# Supplementary material
Source: PubMed Central journal article supplement (PMC395736)
Supplement: gb-2003-5-1-r4-s1.pdf [file gb-2003-5-1-r4-s1.pdf]

## Panel 1, pgs 1-58

| AccessID       | Gene                 | Functional Group | XPRESS Count | d0:d8 ratio | d0:d8 StdDev | Description                                                                                                                                                                                                                                                                                                                                                                                                                                                                      |
|----------------|----------------------|------------------|--------------|-------------|--------------|----------------------------------------------------------------------------------------------------------------------------------------------------------------------------------------------------------------------------------------------------------------------------------------------------------------------------------------------------------------------------------------------------------------------------------------------------------------------------------|
| SW:KGGG_HUMAN  | DGKG                 | 41               | 1            | 10.54       | 0.00         | SW:KGGG_HUMAN P49619 homo sapiens (human). diacylglycerol kinase, gamma (ec 2.7.1.107) (diglyceride kinase) (dkg-gamma) (dag kinase gamma). 5/2000 [MASS=88997]/Diacylglycerol kinase gamma, member of diacylglycerol kinase family, contains EF-hand motifs, zinc finger and ATP-binding site, converts diacylglycerol to phosphatidic acid in a phosphatidylserine-dependent manner, may regulate phospholipid turnover                                                        |
| GP:AB028980_1  | USP24                | 32               | 1            | 9.55        | 0.00         | UBIQUITIN CARBOXYL-TERMINAL HYDROLASE 24 /Member of the ubiquitin carboxyl-terminal hydrolase family 2 that contains a ubiquitin carboxyl-terminal hydrolases family 2 domain, has low similarity to a region of ubiquitin specific protease 9 X chromosome (human USP9X)                                                                                                                                                                                                        |
| PIR2:S12444    | hypothetical/unknown | 45               | 1            | 7.89        | 0.00         | PIR2:S12444 hypothetical protein 458 - human [MASS=49127]/human immunoglobulin lambda genes                                                                                                                                                                                                                                                                                                                                                                                      |
| GPN:AJ278775_1 | VL1                  | 45               | 1            | 7.61        | 0.00         | immunoglobulin light chain variable region (human)                                                                                                                                                                                                                                                                                                                                                                                                                               |
| SW:AT2A_HUMAN  | ATP9A                | 42               | 2            | 5.29        | 2.51         | SW:AT2A_HUMAN O75110 homo sapiens (human). potential phospholipid-transporting atpase iia (ec 3.6.1.-) (fragment). 5/2000 [MASS=116933]/Member of the haloacid dehalogenase or epoxide hydrolase family, has moderate similarity to S. cerevisiae Neo1p, which is an ATPase whose overproduction confers neomycin resistance                                                                                                                                                     |
| GP:AJ002744_1  | GALNT7               | 5, 19            | 1            | 4.00        | 0.00         | GP:AJ002744_1 Homo sapiens mRNA for UDP-GalNAc:polypeptide N-acetylgalactosaminyltransferase 7. [MASS=75402]/UDP-N-acetyl-alpha-D-galactosamine:polypeptide N-acetylgalactosaminyltransferase 7, enzyme that functions in O-glycosylation and is specific for partially glycosylated substrates                                                                                                                                                                                  |
| GP:AF057145_1  | ST14                 | 32               | 1            | 3.98        | 0.00         | (matriptase) (membrane- type serine protease 1) (mt-sp1)/Matriptase, a type 2 integral membrane serine protease, degrades extracellular matrix, activates hepatocyte growth factor (HGF) and urokinase plasminogen activator (PLAU), and may play a role in progression and metastasis of epithelial-derived cancers                                                                                                                                                             |
| SW:PA2M_HUMAN  | PLA2G2A              | 19, 41           | 3            | 3.94        | 1.93         | SW:PA2M_HUMAN P14555 homo sapiens (human). phospholipase a2, membrane associated precursor (ec 3.1.1.4) (phosphatidylcholine 2-acylhydrolase) (group ii phospholipase a2) (non-pancreatic secretory phosph [MASS=16083]/Group IIA phospholipase A2, a secreted member of the phospholipase A2 family that hydrolyzes the phospholipid sn-2 ester bond, plays roles in phospholipid metabolism, host defense, and inflammation; gene loss reported in a sporadic colorectal tumor |
| SW:RDC1_HUMAN  | RDC1                 | 41               | 4            | 3.86        | 1.24         | SW:RDC1_HUMAN P25106 homo sapiens (human). g protein-coupled receptor rdc1 homolog. 7/1998 [MASS=41474]/Chemokine orphan receptor 1, protein with strong similarity to murine Rdc1, which is a member of the G protein-coupled receptor family and related to chemokine receptors of the CXC family, acts as a coreceptor for HIV strains that infect brain cells                                                                                                                |
| SW:SFR7_HUMAN  | SFRS7                | 25, 37, 38       | 2            | 3.66        | 0.49         | SW:SFR7_HUMAN Q16629 homo sapiens (human). splicing factor, arginine/serine-rich 7 (splicing factor 9g8). 5/2000 [MASS=27367]/Splicing factor arginine serine rich 7, a splicing factor of the SR protein family containing an RNA binding domain (RBD) and a serine/arginine (SR) domain that is implicated in alternative pre-mRNA splicing                                                                                                                                    |
| SW:LMG1_HUMAN  | LAMC1                | 6, 16, 31        | 1            | 3.60        | 0.00         | SW:LMG1_HUMAN P11047 homo sapiens (human). laminin gamma-1 chain precursor (laminin b2 chain). 7/1998 [MASS=177607]/Laminin C1, an extracellular matrix glycoprotein that may be involved in cell-matrix adhesion and the regulation of cell shape                                                                                                                                                                                                                               |
| SW:B3A2_HUMAN  | SLC4A2               | 42               | 1            | 3.57        | 0.00         | SW:B3A2_HUMAN P04920 homo sapiens (human). anion exchange protein 2 (non-erythroid band 3-like protein) (bnd3l). 10/1996 [MASS=136814]/Solute carrier family 4 member 2 (anion exchanger 2), a chloride and bicarbonate exchanger that may play a role in pH regulation, binds ankyrin and links the basolateral membrane to the cytoskeleton                                                                                                                                    |
| GP:AK022587_1  | FLJ12525             | 45               | 1            | 3.46        | 0.00         | GP:AK022587_1 Homo sapiens cDNA FLJ12525 fis, clone NT2RM4000030, weakly similar to LAS1 PROTEIN; unnamed protein product. [MASS=83065]/Protein of unknown function, has a region of low similarity to a region of S. cerevisiae Las1p, which is involved in cell morphogenesis, cytoskeletal regulation, and bud formation                                                                                                                                                      |
| SW:NR54_HUMAN  | NONO                 | 25, 37, 38       | 2            | 3.38        | 1.09         | SW:NR54_HUMAN Q15233 homo sapiens (human). 54 kda nuclear ma-binding protein (p54(nrb)) (p54nrb) (55 kda nuclear protein) (nmt55). 5/2000 [MASS=54232]/Non-POU-domain-containing octamer-binding nuclear protein, binds DNA and RNA, and implicated in transcription and pre-mRNA splicing; a fusion partner with TFE3 in papillary renal cell carcinoma                                                                                                                         |
| SW:GPDM_HUMAN  | GPD2                 | 5                | 1            | 3.30        | 0.00         | SW:GPDM_HUMAN P43304 homo sapiens (human). glycerol-3-phosphate dehydrogenase, mitochondrial precursor (ec 1.1.99.5) (gpd-m) (gpdh-m). 5/2000 [MASS=80815]/Mitochondrial glycerol-3-phosphate dehydrogenase, component of the glycerol phosphate shuttle; mutation of the calcium binding domain in the corresponding gene has been found in a patient with type A diabetes                                                                                                      |
| GP:AF002668_1  | DEGS                 | 16, 19, 41       | 1            | 3.29        | 0.00         | GP:AF002668_1 Homo sapiens putative fatty acid desaturase MLD mRNA, complete cds; putative fatty acid desaturase. [MASS=37866]/Degenerative spermatocyte homolog (Drosophila), member of the membrane fatty acid desaturase family, regulates the biosynthesis of the epidermal growth factor receptor (EGFR)                                                                                                                                                                    |
| PIR2:T08789    | CDYL                 | 45               | 1            | 3.26        | 0.00         | PIR2:T08789 hypothetical protein DKFZp586C1622.1 - human (fragment) [MASS=16138]/Homo sapiens testis-specific chromodomain Y-like protein (CDYL) mRNA/Chromodomain protein Y chromosome-like, a ubiquitously-expressed autosomal protein with similarity to chromodomain-containing proteins located on the Y chromosome                                                                                                                                                         |
| SW:SR14_HUMAN  | SRP14                | 36               | 2            | 3.24        | 0.14         | SW:SR14_HUMAN P37108 homo sapiens (human). signal recognition particle 14 kda protein (srp14) (18 kda alu rna binding protein). 5/2000 [MASS=14544]/Signal recognition particle 14 kDa, heterodimer with SRP9 binds Alu-like RNAs, involved in the translocation of newly synthesized proteins across the rough endoplasmic reticulum membrane, may regulate expression and Alu transcript metabolism                                                                            |
| SW:LAM1_HUMAN  | LMNB1                | 11               | 1            | 3.22        | 0.00         | SW:LAM1_HUMAN P20700 homo sapiens (human). lamin b1. 5/2000 [MASS=66277]/Lamin B1, present in the nuclear outer membrane, may be a structural member of the nuclear lamina, cleaved by proteases during apoptosis, targeted by autoantibodies in chronic fatigue syndrome                                                                                                                                                                                                        |

|               |          |                |   |      |      |                                                                                                                                                                                                                                                                                                                                                                                                                                                                                            |
|---------------|----------|----------------|---|------|------|--------------------------------------------------------------------------------------------------------------------------------------------------------------------------------------------------------------------------------------------------------------------------------------------------------------------------------------------------------------------------------------------------------------------------------------------------------------------------------------------|
| GP:AB006537_1 | IL1RAP   | 31, 41         | 1 | 3.20 | 0.00 | GP:AB006537_1 Homo sapiens mRNA for interleukin 1 receptor accessory protein, complete cds. [MASS=65418]/Interleukin-1 receptor accessory protein, a subunit of the interleukin-1 receptor complex, recruits IRAK to the receptor complex in an early stage of interleukin-1 signaling                                                                                                                                                                                                     |
| GP:D63481_1   | SCRIB    | 41             | 1 | 3.09 | 0.00 | GP:D63481_1 Human mRNA for KIAA0147 gene, partial cds; The KIAA0147 gene product is related to adenyl cyclase.. [MASS=166187]/Protein containing PDZ (DHR, GLGF) domains, which target signaling proteins to membranes, contains leucine rich repeats, which mediate protein-protein interactions                                                                                                                                                                                          |
| SW:H33_HUMAN  | H3F3A    | 12             | 1 | 3.08 | 0.00 | SW:H33_HUMAN P06351 homo sapiens (human), mus musculus (mouse), rattus norvegicus (rat), oryctolagus cuniculus (rabbit), gallus gallus (chicken), spisula solidissima (atlantic surf-clam), drosophila mel [MASS=15197]/H3 histone family 3A, a member of the H3 histone family of proteins involved in compaction of DNA into nucleosomes, a replacement histone; expression does not depend on DNA replication                                                                           |
| SW:CAG4_HUMAN | SIAT4A   | 34             | 1 | 2.99 | 0.00 | SW:CAG4_HUMAN Q11201 h cmp-n-acetylneuraminate-beta-galactosamide-alpha-2,3-sialyltransferase (ec 2.4.99.4) (beta-galactoside alpha-2,3-sialyltransferase) (alpha 2,3-st) (gal-nac6s) (gal-beta-1,3-galnac [MASS=39075]/Sialyltransferase 4A (beta-galactoside alpha-2,3-sialyltransferase), member of a sialyltransferase 4 family, catalyzes the transfer of NeuAc from CMP-NeuAc to asialo-fetuin                                                                                       |
| SW:K6PP_HUMAN | PFKP     | 5              | 1 | 2.96 | 0.00 | SW:K6PP_HUMAN Q01813 homo sapiens (human). 6-phosphofructokinase, type c (ec 2.7.1.11) (phosphofructokinase 1) (phosphohexokinase) (phosphofructo-1-kinase isozyme c) (6-phosphofructokinase, platelet typ [MASS=85596]/Platelet-type phosphofructokinase, rate-limiting enzyme of glycolysis that catalyzes the formation of fructose 1,6-bisphosphate from fructose 6-phosphate and ATP; expression may be elevated upon malignant transformation                                        |
| SW:LAMA_HUMAN | LMNA     | 11, 16         | 1 | 2.95 | 0.00 | SW:LAMA_HUMAN P02545 homo sapiens (human). lamin a (70 kda lamin). 5/2000 [MASS=74139]/Lamin A, a structural protein of the nuclear lamina; mutations of the corresponding gene are associated with Emery-Dreifuss muscular dystrophy and partial lipodystrophies                                                                                                                                                                                                                          |
| SW:IF4E_HUMAN | EIF4E    | 35             | 1 | 2.94 | 0.00 | SW:IF4E_HUMAN P06730 homo sapiens (human). eukaryotic translation initiation factor 4e (eif-4e) (eif4e) (mrna cap-binding protein) (eif-4f 25 kda subunit). 5/2000 [MASS=25097]/Eukaryotic translation initiation factor 4E, a subunit of eIF4F, a mRNA cap-binding protein involved in translation initiation, a target of insulin dependent signaling pathway, expression is upregulated in breast carcinomas                                                                            |
| GP:AB000449_1 | VRK1     | 34             | 2 | 2.94 | 1.64 | GP:AB000449_1 Homo sapiens mRNA for VRK1, complete cds. [MASS=45476]/Vaccinia related kinase 1, nuclear serine/threonine kinase that phosphorylates acidic and basic protein substrates, may activate p53 and function in signal transduction, may regulate cellular proliferation, has similarity to vaccinia virus B1R kinase                                                                                                                                                            |
| SW:SBP1_HUMAN | SELENBP1 | 45             | 2 | 2.89 | 0.05 | SW:SBP1_HUMAN Q13228 homo sapiens (human). selenium-binding protein 1. 5/2000 [MASS=52313]/Selenium binding protein 1, may have a role in negative regulation of cell growth; mouse Selenbp1 may play a role in mediating the anticarcinogenic effects of selenium                                                                                                                                                                                                                         |
| SW:LU_HUMAN   | LU       | 6, 41          | 3 | 2.88 | 0.14 | SW:LU_HUMAN P50895 homo sapiens (human). lutheran blood group glycoprotein precursor (b-cam cell surface glycoprotein) (auberger b antigen) (f8/g253 antigen). 11/1997 [MASS=67375]/Precursor of Lutheran blood group glycoprotein and B-CAM, laminin receptors and cell adhesion molecules, have a role in the blood-brain barrier, contribute to vasoocclusion in sickle cell disease and possibly tumorigenesis                                                                         |
| SW:SORC_HUMAN | SRI      | 16, 26, 41, 42 | 2 | 2.86 | 2.11 | SW:SORC_HUMAN P30626 homo sapiens (human). sorcin (22 kda protein) (cp-22) (v19). 11/1997 [MASS=21676]/Sorcin, an EF-hand calcium-binding protein, may be involved in multidrug resistance, a potential modulator of intracellular calcium levels through interaction with the ryanodine receptor                                                                                                                                                                                          |
| GP:AL023881_1 | DECR1    | 26             | 1 | 2.78 | 0.00 | peroxisomal 2,4-dienoyl-CoA reductase /2,4-dienoyl-CoA reductase, an auxiliary beta-oxidation enzyme of the mitochondrion that participates in the metabolism of unsaturated fatty enoyl-CoA esters with double bonds in both odd- and even-numbered positions                                                                                                                                                                                                                             |
| SW:COXG_HUMAN | COX6B    | 18             | 6 | 2.77 | 1.08 | SW:COXG_HUMAN P14854 homo sapiens (human). cytochrome c oxidase polypeptide vib (ec 1.9.3.1) (aed). 11/1997 [MASS=10061]/Cytochrome c oxidase subunit VIb, a putative subunit of cytochrome C oxidase, which couples reduction of oxygen with proton translocation during oxidative phosphorylation                                                                                                                                                                                        |
| SW:FXR1_HUMAN | FXR1     | 16, 24         | 1 | 2.74 | 0.00 | SW:FXR1_HUMAN P51114 homo sapiens (human). fragile x mental retardation syndrome related protein 1. 10/1996 [MASS=69692]/Fragile X mental retardation autosomal homolog 1, binds FMR1, associates with mRNPs and with 60S ribosomal subunits, may have a role in the ribosomal and RNA metabolism of neurons; identified as a scleroderma autoantigen processed during apoptosis                                                                                                           |
| GP:AK024450_1 | LOC89941 | 45             | 1 | 2.73 | 0.00 | GP:AK024450_1 Homo sapiens mRNA for FLJ00042 protein, partial cds; For this clone, GeneMark analysis triggered an alert for spurious CDS split. The result of GeneMark analysis of the nucleotide sequence of this clone i. [MASS=48320]/Protein of unknown function, has a region of low similarity to aplysia Ras-related homolog B (human ARHB), which functions in actin cytoskeleton assembly and is the pharmacological target of certain anti-cancer drugs that inhibit cell growth |
| SW:PSS8_HUMAN | PRSS8    | 45             | 1 | 2.73 | 0.00 | SW:PSS8_HUMAN Q16651 homo sapiens (human). prostatic precursor (ec 3.4.21.-). 7/1998 [MASS=36431]/Protease serine 8 (prostatic), a serine protease that plays a role in regulation of the amiloride-sensitive epithelial sodium channel, may act as a suppressor of invasive prostate and breast cancer, overexpressed in ovarian cancer cells                                                                                                                                             |
| GP:AC005609_7 | PCDHA4   | 6              | 1 | 2.70 | 0.00 | GP:AC005609_7 Homo sapiens chromosome 5, BAC clone 203o13 (LBNL H155), complete sequence. [MASS=84896]/Protocadherin alpha 4, a member of a family of cadherin-like cell adhesion proteins that may have a role in forming neuronal connections in the brain                                                                                                                                                                                                                               |
| SW:NIPM_HUMAN | NDUFS5   | 18             | 2 | 2.69 | 0.02 | SW:NIPM_HUMAN O43920 homo sapiens (human). nadh-ubiquinone oxidoreductase 15 kda subunit (ec 1.6.5.3) (ec 1.6.99.3) (complex i-15 kda) (ci-15 kda). 7/1999 [MASS=12386]/NADH dehydrogenase Fe-S protein 5 (15kD) (NADH-coenzyme Q reductase), putative subunit of NADH-ubiquinone oxidoreductase (complex I), a multiprotein complex that transports electrons from NADH to ubiquinone in the mitochondrial respiratory chain                                                              |

|               |           |                |   |      |      |                                                                                                                                                                                                                                                                                                                                                                                                                                                                                                                                                       |
|---------------|-----------|----------------|---|------|------|-------------------------------------------------------------------------------------------------------------------------------------------------------------------------------------------------------------------------------------------------------------------------------------------------------------------------------------------------------------------------------------------------------------------------------------------------------------------------------------------------------------------------------------------------------|
| SW:ATPQ_HUMAN | ATP5H     | 18             | 3 | 2.67 | 0.53 | SW:ATPQ_HUMAN O75947 homo sapiens (human). atp synthase d chain, mitochondrial (ec 3.6.1.34). 5/2000 [MASS=18360]/Protein with high similarity to subunit d of the mitochondrial H(+)-ATP synthase (rat Atp5jd), which is part of a multisubunit enzyme that catalyzes the synthesis of ATP during oxidative phosphorylation                                                                                                                                                                                                                          |
| SW:PNL1_HUMAN | PNUTL1    | 11, 13         | 2 | 2.64 | 0.07 | SW:PNL1_HUMAN Q99719 homo sapiens (human). peanut-like protein 1 (cell division control related protein 1) (cdcrel-1). 5/2000 [MASS=42777]/Peanut-like (CDCREL-1), member of the septin family of GTP-binding proteins, may be involved in vesicle targeting and fusion, may have a role in velo cardio facial or DiGeorge syndrome; PNUTL1 gene translocations are associated with acute myeloid leukemia                                                                                                                                            |
| GP:AC004957_1 | LOC222217 | 45             | 3 | 2.64 | 0.14 | GP:AC004957_1 Homo sapiens PAC clone RP5-1093O17 from 7q11.23-q21, complete sequence; heterogeneous ribonuclear particle protein A1; similar to P49312 (PID:g1350822); H_DJ1093O17.1. [MASS=33911]                                                                                                                                                                                                                                                                                                                                                    |
| SW:ADDA_HUMAN | ADD1      | 11             | 1 | 2.64 | 0.00 | SW:ADDA_HUMAN P35611 homo sapiens (human). erythrocyte adducin alpha subunit. 7/1998 [MASS=80971]/Adducin 1 alpha, a subunit of the membrane-skeletal adducin complex, may promote assembly of spectrin-actin complexes and regulate ion transport; mutations in the corresponding gene may be associated with hypertension                                                                                                                                                                                                                           |
| SW:Y017_HUMAN | SF3B3     | 25, 31, 37, 38 | 7 | 2.63 | 0.59 | SW:Y017_HUMAN Q15393 homo sapiens (human). hypothetical protein k1aa0017. 5/2000 [MASS=44606]/ Homo sapiens mRNA for SAP 130 spliceosomal protein/Splicing factor 3b subunit 3, a component of the U2 snRNP-associated protein complex SF3b that plays a role in spliceosome assembly, interacts with STAGA and TFTC complexes implicated in DNA repair, chromatin modification, and transcription                                                                                                                                                    |
| SW:TPP1_HUMAN | CLN2      | 19, 32         | 1 | 2.62 | 0.00 | SW:TPP1_HUMAN O14773 homo sapiens (human). tripeptidyl-peptidase i precursor (ec 3.4.14.9) (tpp-i) (tripeptidyl aminopeptidase) (lysosomal pepstatin insensitive protease) (lpic). 5/2000 [MASS=61229]/Tripeptidyl peptidase I (ceroid-lipofuscinosis neuronal 2), a lysosomal serine-type peptidase required for degradation of ATP synthase subunit c (ATP5G1 and ATP5G2); mutations in the corresponding gene cause late infantile neuronal ceroid lipofuscinosis                                                                                  |
| SW:PUR_HUMAN  | PURA      | 15, 29         | 2 | 2.62 | 0.17 | SW:PUR_HUMAN Q00577 homo sapiens (human). transcriptional activator protein pur-alpha (purine-rich single-stranded dna-binding protein alpha). 7/1998 [MASS=34911]/Purine rich element binding protein A, a single-stranded DNA-RNA binding protein implicated in the control of transcription and DNA replication; interacts with HIV Tat protein and JC virus T antigen to modulate host and viral gene expression                                                                                                                                  |
| GP:AC004528_1 | WDR18     | 45             | 1 | 2.62 | 0.00 | GP:AC004528_1 Homo sapiens chromosome 19, cosmid R32184, complete sequence; Hypothetical human protein (partial CDS); CDS constructed from combination of BLASTX, EST matches and Xgrail predictions. N-terminus of protein likely encoded in flanking cosmid R29942. Pr [MASS=47306]/Protein containing four WD domains (WD-40 repeat), which may mediate protein-protein interactions, has a region of low similarity to a region of TATA box binding protein associated factor 2d 100 kD (human TAF5), which functions in transcription initiation |
| GP:AJ001258_1 | NIPSNAP1  | 45             | 1 | 2.60 | 0.00 | GP:AJ001258_1 Homo sapiens mRNA for NIPSNAP1 protein. [MASS=33324]/NIPSNAP C. elegans homolog 1, a member of the NIPSNAP family of proteins, may have a vesicle transport-related function                                                                                                                                                                                                                                                                                                                                                            |
| SW:ATCK_HUMAN | ATP2C1    | 16, 26, 42     | 2 | 2.59 | 0.30 | SW:ATCK_HUMAN P98194 homo sapiens (human). calcium-transporting atpase 2c1 (ec 3.6.1.38) (atp-dependent ca2+ pump pmr1). 5/2000 [MASS=100606]/ATPase (Ca2+ transporting) type 2c member 1, a Ca2+-transporting P-type ATPase involved in Ca2+ homeostasis that may also may play a role in epidermal differentiation; mutations in the gene cause Hailey-Hailey disease, a blistering skin disease                                                                                                                                                    |
| SW:DD17_HUMAN | DDX17     | 25, 37         | 1 | 2.58 | 0.00 | SW:DD17_HUMAN Q92841 homo sapiens (human). probable ma-dependent helicase p72 (dead-box protein p72) (dead box protein 17). 5/2000 [MASS=72371]/DEAD H box protein 17, a member of the DEAD box family of RNA-dependent ATPases and ATP-dependent RNA helicases, a component of an estrogen receptor alpha (ESR) transcriptional coactivator complex                                                                                                                                                                                                  |
| GP:AF085361_1 | MTCH2     | 45             | 5 | 2.58 | 0.98 | GP:AF085361_1 Homo sapiens HSPC032 mRNA, complete cds. [MASS=33331]/mitochondrial carrier homolog 2 /Member of the mitochondrial carrier protein family of membrane transporters, has strong similarity to uncharacterized mouse Mtch2                                                                                                                                                                                                                                                                                                                |
| SW:ADT3_HUMAN | SLC25A6   | 18, 42         | 1 | 2.57 | 0.00 | SW:ADT3_HUMAN P12236 homo sapiens (human). adp,atp carrier protein, liver isoform t2 (adp/atp translocase 3) (adenine nucleotide translocator 3) (ant 3). 11/1995 [MASS=32866]/Solute carrier family 25 member 6 (adenine nucleotide translocator), member of the ADP/ATP translocase family                                                                                                                                                                                                                                                          |
| SW:GRBA_HUMAN | GRB10     | 16, 41         | 3 | 2.55 | 2.22 | SW:GRBA_HUMAN Q13322 homo sapiens (human). growth factor receptor-bound protein 10 (grb10 adaptor protein) (insulin receptor binding protein grb-ir) (k1aa0207). 5/2000 [MASS=67231]/Growth factor receptor bound protein 10, an adaptor protein with PH and SH2 domains that binds to various receptor and cytosolic kinases and may mediate growth factor and Src family kinase signaling; variants may be associated with Russell-Silver Syndrome                                                                                                  |
| SW:ADT2_HUMAN | SLC25A5   | 18, 42         | 8 | 2.53 | 1.17 | SW:ADT2_HUMAN P05141 homo sapiens (human). adp,atp carrier protein, fibroblast isoform (adp/atp translocase 2) (adenine nucleotide translocator 2) (ant 2). 7/1999 [MASS=32895]/Solute carrier family 25 member 5 (adenine nucleotide translocator 2), may mediate the exchange of ADP and ATP between the cytosol and mitochondria, expression is altered in dilated cardiomyopathy                                                                                                                                                                  |
| GP:AF161397_1 | HPCL2     | 19             | 2 | 2.53 | 0.16 | GP:AF161397_1 Homo sapiens HSPC279 mRNA, partial cds. [MASS=64199]/Homo sapiens mRNA for 2-hydroxyphytanoyl-CoA lyase; thiamine pyrophosphate dependent enzyme/2-Hydroxyphytanoyl-CoA lyase (peroxisomal 2-hydroxyphytanoyl-CoA lyase), catalyzes the thiamine pyrophosphate-dependent cleavage of C-C bonds during alpha-oxidation of 3-methyl-branched fatty acids to form formyl-CoA and 2-methyl-branched fatty aldehyde                                                                                                                          |
| SW:DHSA_HUMAN | SDHA      | 5, 18          | 5 | 2.48 | 0.32 | SW:DHSA_HUMAN P31040 homo sapiens (human). succinate dehydrogenase [ubiquinone] flavoprotein subunit, mitochondrial precursor (ec 1.3.5.1) (fp) (flavoprotein subunit of complex ii). 5/2000 [MASS=72692]/Succinate dehydrogenase complex subunit A (flavoprotein), transports electrons from succinate to ubiquinone in the TCA cycle and respiratory chain; gene mutation is associated with Leigh syndrome, which is a complex II respiratory chain deficiency                                                                                     |

|                |        |                |    |      |      |                                                                                                                                                                                                                                                                                                                                                                                                                                                                |
|----------------|--------|----------------|----|------|------|----------------------------------------------------------------------------------------------------------------------------------------------------------------------------------------------------------------------------------------------------------------------------------------------------------------------------------------------------------------------------------------------------------------------------------------------------------------|
| SW:ROU_HUMAN   | HNRPU  | 25, 37         | 29 | 2.48 | 0.62 | SW:ROU_HUMAN Q00839 homo sapiens (human). heterogenous nuclear ribonucleoprotein u (hnnp u) (scaffold attachment factor a) (saf-a). 5/2000 [MASS=90479]/Heterogeneous nuclear ribonucleoprotein U (scaffold attachment factor A), binds RNA, binds EP300 in a complex that binds scaffold-matrix attachment regions of TOP1, involved in chromatin structure, apoptosis, and perhaps RNA processing and transcription                                          |
| SW:ROA1_HUMAN  | HNRPA1 | 24, 25, 37, 38 | 11 | 2.48 | 0.85 | SW:ROA1_HUMAN P09651 homo sapiens (human). heterogeneous nuclear ribonucleoprotein a1 (helix-destabilizing protein) (single-strand binding protein) (hnmp core protein a1). 11/1997 [MASS=38715]/Heterogeneous nuclear ribonucleoprotein A1, an RNA-binding protein involved in mRNA splicing and translational control, undergoes nucleocytoplasmic shuttling possibly for mRNA export and telomerase recruitment; an autoantigen in autoimmune disorders     |
| SWN:POR3_HUMAN | VDAC3  | 42             | 6  | 2.48 | 0.55 | SWN:POR3_HUMAN Q9y277 homo sapiens (human). voltage-dependent anion-selective channel protein 3 (vdac-3) (hvdac3) (outer mitochondrial membrane protein porin 3). 8/2001 [MASS=30659]/Voltage-dependent anion channel 3, may function as a voltage-gated pore of the outer mitochondrial membrane that binds hexokinase and glycerol kinase and transports adenine nucleotides                                                                                 |
| SW:RS2_HUMAN   | RPS2   | 35             | 7  | 2.46 | 1.54 | SW:RS2_HUMAN P15880 homo sapiens (human). 40s ribosomal protein s2 (s4) (llrep3 protein). 10/1996 [MASS=31324]/Ribosomal protein S2, a putative component of the small 40S ribosomal subunit, may bind RNA, upregulated in squamous cell carcinoma and in breast and colon tumors                                                                                                                                                                              |
| SW:PPCM_HUMAN  | PCK2   | 5, 18          | 6  | 2.45 | 1.09 | SW:PPCM_HUMAN Q16822 homo sapiens (human). phosphoenolpyruvate carboxykinase, mitochondrial precursor [gtp] (ec 4.1.1.32) (phosphoenolpyruvate carboxylase) (pepck-m). 7/1999 [MASS=70637]/Phosphoenolpyruvate carboxykinase 2, catalyzes the formation of phosphoenolpyruvate by decarboxylation of oxaloacetate, rate-limiting step of gluconeogenesis                                                                                                       |
| SW:UCRI_HUMAN  | UQCRC1 | 18             | 4  | 2.45 | 0.39 | SW:UCRI_HUMAN P47985 homo sapiens (human). ubiquinol-cytochrome c reductase iron-sulfur subunit, mitochondrial precursor (ec 1.10.2.2) (rieske iron-sulfur protein) (risp). 7/1999 [MASS=29652]/Ubiquinol-cytochrome c reductase Rieske iron-sulfur polypeptide 1, a subunit of cytochrome bc1 complex, which transfers electron from ubiquinol to cytochrome c, located in the mitochondrion; deficient mitochondrial uptake may cause mitochondrial myopathy |
| SW:TOP1_HUMAN  | TOP1   | 12             | 1  | 2.45 | 0.00 | SW:TOP1_HUMAN P11387 homo sapiens (human). dna topoisomerase i (ec 5.99.1.2). 12/1998 [MASS=90754]/DNA topoisomerase I, a monomeric enzyme that relaxes supercoiled DNA and is mutated in camptothecin (CPT)-resistant human leukemia cell lines, a major self-antigen found in patients with systemic sclerosis                                                                                                                                               |
| SW:THIL_HUMAN  | ACAT1  | 18, 19         | 2  | 2.44 | 0.44 | SW:THIL_HUMAN P24752 homo sapiens (human). acetyl-coa acetyltransferase, mitochondrial precursor (ec 2.3.1.9) (acetoacetyl-coa thiolase) (t2). 7/1999 [MASS=45200]/Acetyl-Coenzyme A acetyltransferase 1 (mitochondrial acetoacetyl-coenzyme A thiolase); mutations in the corresponding gene are associated with 3-ketothiolase deficiency                                                                                                                    |
| SW:IBP2_HUMAN  | IGFBP2 | 41             | 6  | 2.43 | 0.38 | SW:IBP2_HUMAN P18065 homo sapiens (human). insulin-like growth factor binding protein 2 precursor (igfbp-2) (ibp-2) (igf-binding protein 2). 12/1998 [MASS=35138]/Insulin like growth factor binding protein 2, binds to and modulates insulin-like growth factor activity, regulates cell proliferation, may be involved in apoptosis; associated with the malignant phenotype, may play a role in prostatic involution                                       |
| GP:AF151809_1  | CGI-51 | 45             | 1  | 2.42 | 0.00 | GP:AF151809_1 Homo sapiens CGI-51 protein mRNA, complete cds. [MASS=52160]/similar to GASTRIN/CHOLECYSTOKININ TYPE BRECEPTOR (CCK-B RECEPTOR) (CCK-BR) (H. sapiens)/Protein of unknown function, has low similarity to uncharacterized C. elegans GOP-3                                                                                                                                                                                                        |
| SW:RS20_HUMAN  | RPS20  | 35             | 1  | 2.42 | 0.00 | SW:RS20_HUMAN P17075 homo sapiens (human), and rattus norvegicus (rat). 40s ribosomal protein s20. 5/2000 [MASS=13373]/Ribosomal protein S20, a putative component of the small 40S ribosomal subunit, may play a role in apoptosis                                                                                                                                                                                                                            |
| SW:UCR2_HUMAN  | UQCRC2 | 18             | 1  | 2.42 | 0.00 | SW:UCR2_HUMAN P22695 homo sapiens (human). ubiquinol-cytochrome c reductase complex core protein 2 precursor (ec 1.10.2.2) (complex iii subunit ii). 7/1999 [MASS=48470]/Ubiquinol-cytochrome c reductase core protein II, a putative ubiquinol-cytochrome c reductase subunit of the mitochondrial cytochrome bc1 complex, likely to play a role in oxidative phosphorylation, may be involved in aerobic respiration                                         |
| SW:TFPI_HUMAN  | TFPI   | 45             | 1  | 2.40 | 0.00 | SW:TFPI_HUMAN P10646 homo sapiens (human). tissue factor pathway inhibitor precursor (tfpi) (lipoprotein- associated coagulation inhibitor) (laci) (extrinsic pathway inhibitor) (epi). 12/1998 [MASS=35015]/Tissue factor pathway inhibitor, a Kunitz-type protease inhibitor that inhibits fibrin clot formation by directly inhibiting factor Xa and indirectly inhibiting the factor VIIa/tissue factor complex                                            |
| SW:ATPA_HUMAN  | ATP5A1 | 18, 42         | 8  | 2.38 | 0.42 | SW:ATPA_HUMAN P25705 homo sapiens (human). atp synthase alpha chain, mitochondrial precursor (ec 3.6.1.34). 12/1998 [MASS=59751]/ATP synthase H+ transporting mitochondrial F1 complex alpha subunit isoform 1 cardiac muscle, part of the synthase enzymatic complex that catalyzes the synthesis of ATP during oxidative phosphorylation                                                                                                                     |
| SW:MAZ_HUMAN   | MAZ    | 19, 29, 41     | 1  | 2.37 | 0.00 | SW:MAZ_HUMAN P56270 homo sapiens (human). myc-associated zinc finger protein (mazi) (purine-binding transcription factor) (pur-1) (zif87) (zif87). 7/1999 [MASS=48608]/MYC-associated zinc finger protein (purine-binding transcription factor), functions both as a positive and a negative regulator of gene expression and may also have roles in initiating and terminating transcription                                                                  |
| GP:AB018266_1  | MATR3  | 11             | 4  | 2.37 | 0.25 | GP:AB018266_1 Homo sapiens mRNA for KIAA0723 protein, complete cds. [MASS=94623]/Homo sapiens matrin 3 mRNA, complete cds/Matrin 3, an acidic protein that is a component of the nuclear matrix                                                                                                                                                                                                                                                                |
| SW:POR1_HUMAN  | VDAC1  | 41, 42         | 28 | 2.36 | 0.34 | SW:POR1_HUMAN P21796 homo sapiens (human). voltage-dependent anion-selective channel protein 1 (hvdac1) (outer mitochondrial membrane protein porin 1) (plasmalemmal porin) (porin 31h) (porin 31hm). 5/2 [MASS=30641]/Voltage-dependent anion channel 1, mitochondrial outer membrane anion channel that mediates apoptotic signals from Bcl-2 (BCL2) and related proteins; deficiency of protein in skeletal muscle causes mitochondrial encephalomyopathy   |

|               |           |                |    |      |      |                                                                                                                                                                                                                                                                                                                                                                                                                                                    |
|---------------|-----------|----------------|----|------|------|----------------------------------------------------------------------------------------------------------------------------------------------------------------------------------------------------------------------------------------------------------------------------------------------------------------------------------------------------------------------------------------------------------------------------------------------------|
| SW:ETFA_HUMAN | ETFA      | 18, 19         | 1  | 2.36 | 0.00 | SW:ETFA_HUMAN P13804 homo sapiens (human). electron transfer flavoprotein alpha-subunit precursor (alpha-ef). 5/2000 [MASS=35080]/Electron transfer flavoprotein alpha subunit, shuttles electrons between flavoprotein dehydrogenases of mitochondrial fatty acid metabolism and ubiquinone oxidoreductase, deficiency associated with Type II glutaricaciduria                                                                                   |
| GP:AF042284_1 | SQRDL     | 45             | 3  | 2.36 | 0.51 | GP:AF042284_1 Homo sapiens unknown mRNA; similar to fission yeast sulfide dehydrogenase. [MASS=49961]/CGI-44 protein (sulfide dehydrogenase like yeast), a putative oxidoreductase homolog of Schizosaccharomyces pombe hmt2                                                                                                                                                                                                                       |
| SW:UCRH_HUMAN | UQCRH     | 18             | 3  | 2.36 | 0.26 | SW:UCRH_HUMAN P07919 homo sapiens (human). ubiquinol-cytochrome c reductase complex 11 kda protein precursor (ec 1.10.2.2) (mitochondrial hinge protein) (cytochrome c1, nonheme 11 kda protein) (complex [MASS=10755]/Ubiquinol-cytochrome c reductase hinge protein, hinges cytochrome c with cytochrome c1 in the mitochondrial respiratory chain, may function to accelerate apoptosis by enhancing cytochrome c release from the mitochondria |
| SW:U2AG_HUMAN | U2AF35    | 25, 37, 38     | 2  | 2.34 | 0.02 | SW:U2AG_HUMAN Q01081 homo sapiens (human). splicing factor u2af 35 kda subunit (u2 auxiliary factor 35 kda subunit) (u2 snrnp auxiliary factor small subunit). 12/1998 [MASS=27872]/U2(RNU2) small nuclear RNA auxiliary factor 1, functions as a pre-mRNA splicing protein, involved in the functional recognition of the 3' splice site AG dinucleotide, interacts with ZNF265 protein involved in alternative splicing                          |
| SW:MIF_HUMAN  | MIF       | 45             | 7  | 2.34 | 1.65 | SW:MIF_HUMAN P14174 homo sapiens (human). macrophage migration inhibitory factor (mif) (glycosylation-inhibiting factor) (gif). 5/2000 [MASS=12345]/Macrophage migration inhibitory factor, an immunoregulatory cytokine involved in monocyte migration and chemotaxis, T cell activation, delayed type hypersensitivity, and the response to lipopolysaccharide, counteracts glucocorticoid suppression                                           |
| GP:AK001714_1 | FLJ10852  | 45             | 2  | 2.32 | 0.41 | GP:AK001714_1 Homo sapiens cDNA FLJ10852 fis, clone NT2RP4001498, weakly similar to ANKYRIN REPEAT-CONTAINING PROTEIN AKR1; unnamed protein product. [MASS=54514]/Protein contains five ankyrin (Ank) repeats, which may mediate protein-protein interactions, and a DHHC-type zinc finger or NEW1 domain                                                                                                                                          |
| SW:GST3_HUMAN | MGST3     | 19, 41         | 2  | 2.31 | 0.83 | SW:GST3_HUMAN O14880 homo sapiens (human). microsomal glutathione s-transferase 3 (ec 2.5.1.18) (microsomal gst-3) (microsomal gst-iii). 5/2000 [MASS=16516]/Microsomal glutathione S-transferase 3, a microsomal membrane protein that has glutathione-dependent transferase and peroxidase activities, member of a family that includes 5-lipoxygenase activating protein (ALOX5AP) and leukotriene-C4 synthase (LTC4S)                          |
| GP:AF151817_1 | LOC51631  | 45             | 1  | 2.31 | 0.00 | GP:AF151817_1 Homo sapiens CGI-59 protein mRNA, complete cds. [MASS=45695]/weakly similar to SPLICING FACTOR, ARGININE/SERINE-RICH 4/Member of the DUF259 protein of unknown function family, has strong similarity to uncharacterized human LUC7L                                                                                                                                                                                                 |
| SW:RFA1_HUMAN | RPA1      | 14, 15, 29, 40 | 1  | 2.30 | 0.00 | SW:RFA1_HUMAN P27694 homo sapiens (human). replication protein a 70 kda dna-binding subunit (rp-a) (rf-a) (replication factor-a protein 1) (single-stranded dna-binding protein). 11/1997 [MASS=68138]/Replication protein A1 (70 kDa), a DNA replication factor A subunit, has roles in DNA replication, recombination, repair, may contribute to latent virus reactivation, inactivated by anti-cancer drug adozelesin                           |
| SW:MDHM_HUMAN | MDH2      | 18             | 27 | 2.29 | 1.04 | SW:MDHM_HUMAN P40926 homo sapiens (human). malate dehydrogenase, mitochondrial precursor (ec 1.1.1.37). 5/2000 [MASS=35531]/Mitochondrial malate dehydrogenase, part of the malate-aspartate shuttle where it putatively catalyzes the oxidation of malate to oxaloacetate                                                                                                                                                                         |
| SW:ES1_HUMAN  | C21orf33  | 45             | 4  | 2.28 | 0.84 | SW:ES1_HUMAN P30042 homo sapiens (human). es1 protein homolog precursor (protein knp-i) (gt335). 5/2000 [MASS=28142]/Protein with similarity to zebrafish ES1 and E. coli SCR-P-27A, highly expressed in skeletal muscle and heart                                                                                                                                                                                                                 |
| SW:Z142_HUMAN | ZNF142    | 45             | 1  | 2.28 | 0.00 | SW:Z142_HUMAN P52746 homo sapiens (human). zinc finger protein 142 (kiaa0236) (ha4654). 5/2000 [MASS=187866]/Zinc finger protein 142, a putative transcription factor, member of the Kruppel zinc-finger protein family                                                                                                                                                                                                                            |
| SW:NB8M_HUMAN | NDUFB7    | 6, 18          | 2  | 2.27 | 0.65 | SW:NB8M_HUMAN P17568 homo sapiens (human). nadh-ubiquinone oxidoreductase b18 subunit (ec 1.6.5.3) (ec 1.6.99.3) (complex i-b18) (ci-b18) (cell adhesion protein sqm1). 7/1998 [MASS=15648]/Subunit of the NADH-ubiquinone oxidoreductase (complex I), a multiprotein complex that transports electrons from NADH to ubiquinone, functions as a cell adhesion molecule with a role in metastasis, may have a role in drug transport                |
| SW:DDX5_HUMAN | DDX5      | 16, 25, 37     | 1  | 2.27 | 0.00 | SW:DDX5_HUMAN P17844 homo sapiens (human). probable ma-dependent helicase p68 (dead-box protein p68) (dead box protein 5). 7/1998 [MASS=69148]/DEAD/H (Asp-Glu-Ala-Asp/His) box polypeptide 5 (RNA helicase 68kD), a ATP-dependent RNA helicase that has ATP-independent RNA renaturation activity and catalyses branch migration, binds estrogen receptor alpha and function as a transcriptional coactivator                                     |
| GP:X92689_1   | GALNAC-T3 | 26, 34, 41     | 3  | 2.26 | 0.17 | GP:X92689_1 Homo sapiens mRNA for UDP-GalNAC:polypeptide N-acetylgalactosaminyl transferase (GalNAC-T3). [MASS=72638]/N-acetylgalactosaminyltransferase T3 (UDP-N-acetyl-alpha-D-galactosamine:polypeptide N-acetylgalactosaminyltransferase 3), enzyme that initiates O-glycosylation; elevated levels may be associated with differentiation of adenocarcinomas                                                                                  |
| GP:U96114_1   | WWP2      | 45             | 1  | 2.25 | 0.00 | GP:U96114_1 Homo sapiens Nedd4-like ubiquitin-protein ligase WWP2 mRNA, complete cds; Nedd4-like ubiquitin-protein ligase; WW domain-containing protein. [MASS=99070]/Atrophin 1 interacting protein 2, putative Nedd4-like ubiquitin ligase, may play a role in the ubiquitination and endocytosis of C1C 5 protein (CLCN5), may be involved in the ubiquitin-dependent degradation of LMP2A and Lyn                                              |
| SW:DHSB_HUMAN | SDHB      | 5, 18          | 1  | 2.24 | 0.00 | SW:DHSB_HUMAN P21912 homo sapiens (human). succinate dehydrogenase [ubiquinone] iron-sulfur protein, mitochondrial precursor (ec 1.3.5.1) (ip) (ip subunit of complex ii). 5/2000 [MASS=31629]/Succinate dehydrogenase complex iron sulfur subunit B, part of an enzyme complex that transports electrons from succinate to ubiquinone in the TCA cycle and aerobic respiratory chain, may be involved in familial pheochromocytoma                |
| GP:AF146192_1 | MRPS30    | 45             | 1  | 2.24 | 0.00 | mitochondrial ribosomal protein S30; PAP protein; programmed cell death 9; bone marrow protein BM04/Mitochondrial ribosomal protein S30 (programmed cell death 9), a putative structural protein of the mitochondrial small 28S ribosomal subunit, may play a role in protein biosynthesis and apoptosis                                                                                                                                           |

|               |          |            |   |      |      |                                                                                                                                                                                                                                                                                                                                                                                                                                                                         |
|---------------|----------|------------|---|------|------|-------------------------------------------------------------------------------------------------------------------------------------------------------------------------------------------------------------------------------------------------------------------------------------------------------------------------------------------------------------------------------------------------------------------------------------------------------------------------|
| SW:CYPM_HUMAN | PPIF     | 33         | 1 | 2.24 | 0.00 | SW:CYPM_HUMAN P30405 homo sapiens (human). peptidyl-prolyl cis-trans isomerase, mitochondrial precursor (ec 5.2.1.8) (ppiase) (rotamase) (cyclophilin). 11/1997 [MASS=22040]/Peptidylprolyl isomerase F (Cyclophilin F), a putative mitochondrial protein that binds the immunosuppressant drug cyclosporin A                                                                                                                                                           |
| SW:UCR1_HUMAN | UQCRC1   | 18         | 8 | 2.24 | 0.43 | SW:UCR1_HUMAN P31930 homo sapiens (human). ubiquinol-cytochrome c reductase complex core protein i precursor (ec 1.10.2.2). 7/1999 [MASS=52619]/Ubiquinol-cytochrome c reductase core protein I, a subunit of the ubiquinol-cytochrome c oxidoreductase component of the mitochondrial respiratory chain, may function as an electron transporter in aerobic respiration and oxidative phosphorylation                                                                  |
| SW:CATA_HUMAN | CAT      | 10         | 3 | 2.24 | 0.12 | SW:CATA_HUMAN P04040 homo sapiens (human). catalase (ec 1.11.1.6). 5/2000 [MASS=59756]/Catalase, a tetrameric hemoprotein that detoxifies H <sub>2</sub> O, part of the oxidative stress response, activity is altered in some forms of cancer and increased during septic shock; gene mutation causes acatalasemia                                                                                                                                                     |
| SW:MA32_HUMAN | C1QBP    | 45         | 9 | 2.23 | 0.22 | SW:MA32_HUMAN Q07021 homo sapiens (human). complement component 1, q subcomponent binding protein, mitochondrial precursor (glycoprotein gc1qbp) (gc1q-r protein) (hyaluronan-binding protein 1) (pre-mrna [MASS=31362]/Complement component 1 q subcomponent binding protein, binds the globular heads of complement subcomponent C1q, interacts with a wide array of proteins, involved in regulation of complement activation, may be associated with sperm motility |
| GP:AF220049_1 | MDS029   | 45         | 3 | 2.22 | 0.51 | GP:AF220049_1 Homo sapiens uncharacterized hematopoietic stem/progenitor cells protein MDS029 mRNA, complete cds. [MASS=12199]/Protein of unknown function, has high similarity to a region of C. elegans KLP-17, which is a C-terminal motor kinesin that is involved in chromosome movement during early embryonic and germ line development                                                                                                                          |
| GP:AF150087_1 | TIMM8A   | 36         | 1 | 2.22 | 0.00 | mitochondrial import inner membrane translocase subunit tim8 b (deafness dystonia protein 2)/Translocase of inner mitochondrial membrane 8 (yeast) homolog A, member of a family of small zinc finger proteins, involved in mitochondrial protein import, may be involved in neurogenesis or X-inactivation; gene mutations cause Mohr Tranebjærg syndrome                                                                                                              |
| SW:NHPX_HUMAN | NHP2L1   | 7, 25, 37  | 2 | 2.21 | 0.20 | SW:NHPX_HUMAN P55769 homo sapiens (human). nhp2/rs6 family protein yel026w homolog (high mobility group-like nuclear protein 2 homolog) (otk27). 5/2000 [MASS=14174]/Non-histone chromosome protein 2 (S. cerevisiae)-like 1, a member of a family of RNP-associated proteins, a component of the spliceosome and rRNA processing machinery, recognizes a shared stem-internal loop-stem structure in its RNA targets                                                   |
| SW:NRP_HUMAN  | NRP1     | 16, 41     | 8 | 2.20 | 1.33 | SW:NRP_HUMAN O14786 homo sapiens (human). neuropilin precursor (vascular endothelial cell growth factor 165 receptor). 5/2000 [MASS=103121]/Neuropilin 1, a receptor for VEGF (165) and the axonal chemorepellent Semaphorin III, involved in organogenesis, axon guidance and angiogenesis, may regulate cell proliferation and response to wounding, upregulated in neuroblastoma vascular endothelium                                                                |
| SW:TISB_HUMAN | BRF1     | 45         | 2 | 2.19 | 0.60 | SW:TISB_HUMAN Q07352 homo sapiens (human). tis11b protein (butyrate response factor 1) (egf-response factor 1) (erf-1). 7/1999 [MASS=36314]/TATA box binding protein-associated factor RNA polymerase III C 90, a subunit of RNA polymerase III transcription factor TFIIIB that is required for transcription of genes encoding tRNA, 5S rRNA, and small nuclear RNAs                                                                                                  |
| SW:RS16_HUMAN | RPS16    | 35         | 8 | 2.18 | 0.76 | SW:RS16_HUMAN P17008 homo sapiens (human), and rattus norvegicus (rat). 40s ribosomal protein s16. 7/1999 [MASS=16314]/Ribosomal protein S16, putative component of the small 40S ribosomal subunit                                                                                                                                                                                                                                                                     |
| SW:NUBM_HUMAN | NDUFV1   | 18         | 7 | 2.18 | 0.99 | SW:NUBM_HUMAN P49821 homo sapiens (human). nadh-ubiquinone oxidoreductase 51 kda subunit precursor (ec 1.6.5.3) (ec 1.6.99.3) (complex i-51kd) (ci-51kd). 5/2000 [MASS=50956]/NADH dehydrogenase ubiquinone flavoprotein 1 (51 kDa), a subunit of NADH-ubiquinone oxidoreductase (Complex I); genetic variants are associated with mitochondrial complex I deficiency, leukodystrophy, and myoclonic epilepsy                                                           |
| SW:MSH3_HUMAN | MSH3     | 14         | 1 | 2.18 | 0.00 | SW:MSH3_HUMAN P20585 homo sapien/Mismatch repair protein 3, dimerizes with MSH2 to form damaged-DNA recognition complex MutS beta, repairs short insertion-deletion loops (2-8 base pairs), may bind PCNA to effect repair, maintains stability of the genome and may suppress tumors (human). dna mismatch repair protein msh3 (divergent upstream protein) (dup) (mismatch repair protein 1) (mrp1). 12/1998 [MASS=127384]                                            |
| PIR2:A54601   | HNRPD    | 25, 37, 39 | 9 | 2.17 | 0.65 | PIR2:A54601 RNA-binding protein AUF1 - human [MASS=31200]/Heterogeneous nuclear ribonucleoprotein D (AU-rich element RNA-binding protein 1 37kD), an RNA and DNA-binding protein which binds to AU-rich elements in the 3' untranslated regions of mRNAs and mediates their degradation                                                                                                                                                                                 |
| GP:AC002540_1 | SLC25A13 | 42         | 1 | 2.16 | 0.00 | GP:AC002540_1 Human BAC clone GS1-25M2 from 7q21-q22, complete sequence; [MASS=25323]/Solute carrier family 25 member 13 (citrin), a calcium-dependent mitochondrial solute transporter that may play a role in urea cycle function; mutation of the corresponding gene result in neonatal, infantile and adult onset forms of type II citrullinemia                                                                                                                    |
| SW:ATPG_HUMAN | ATP5C1   | 18, 42     | 3 | 2.15 | 0.32 | SW:ATPG_HUMAN P36542 homo sapiens (human). atp synthase gamma chain, mitochondrial precursor (ec 3.6.1.34). 5/2000 [MASS=32996]/ATP synthase H+ transporting mitochondrial F1 complex gamma 1, putative component of multisubunit enzyme that synthesizes ATP during oxidative phosphorylation, exists in tissue-specific alternative forms that are spliced in response to acidic conditions                                                                           |
| GP:D26361_1   | KIAA0042 | 45         | 1 | 2.15 | 0.00 | GP:D26361_1 Human mRNA for KIAA0042 gene, complete cds. [MASS=186492]/EST/Protein containing two kinesin motor domains, which bind ATP and microtubules, and two forkhead associated (FHA) domains, which bind phosphopeptides, has a region of moderate similarity to a region of plus-end directed motor kinesin (C. elegans UNC-104)                                                                                                                                 |
| SW:MA2B_HUMAN | MAN2B1   | 5, 34      | 1 | 2.14 | 0.00 | SW:MA2B_HUMAN O00754 homo sapiens (human). lysosomal alpha-mannosidase precursor (ec 3.2.1.24) (mannosidase, alpha b) (lysosomal acid alpha-mannosidase) (laman). 5/2000 [MASS=113673]/Mannosidase alpha class 2B member 1, catalyzes the hydrolysis of alpha-mannoside linkages in glycoprotein catabolism, enzyme activity is inhibited by azafuranose analogs of mannose, deficiency is associated with alpha-mannosidosis                                           |

|                |          |               |    |      |      |                                                                                                                                                                                                                                                                                                                                                                                                                                                                                                                                                                                                                                   |
|----------------|----------|---------------|----|------|------|-----------------------------------------------------------------------------------------------------------------------------------------------------------------------------------------------------------------------------------------------------------------------------------------------------------------------------------------------------------------------------------------------------------------------------------------------------------------------------------------------------------------------------------------------------------------------------------------------------------------------------------|
| GP:AK022590_1  | FLJ12528 | 45            | 1  | 2.13 | 0.00 | GP:AK022590_1 Homo sapiens cDNA FLJ12528 fis, clone NT2RM4000155, moderately similar to THREONYL-TRNA SYNTHETASE, CYTOPLASMIC (EC 6.1.1.3); unnamed protein product. [MASS=66372]/Protein containing a tRNA synthetase class II core domain (G, H, P, S and T), a TGS (ThrRS, GTPase, and SpoT) domain, and an anticodon binding domain, has moderate similarity to threonyl-tRNA synthetase (human TARS)/Protein containing a tRNA synthetase class II core domain (G, H, P, S and T), a TGS (ThrRS, GTPase, and SpoT) domain, and an anticodon binding domain, has moderate similarity to threonyl-tRNA synthetase (human TARS) |
| SW:MRP_HUMAN   | CSRP3    | 16            | 21 | 2.13 | 0.55 | SW:MRP_HUMAN P49006 homo sapiens (human). marcks-related protein (mac-marcks). 12/1998 [MASS=19398]/Cysteine- and glycine-rich protein 3, a zinc-finger LIM domain protein that is an essential regulator of cardiac muscle development, expression is decreased in chronic heart failure                                                                                                                                                                                                                                                                                                                                         |
| SWN:NDR2_HUMAN | NDRG2    | 45            | 2  | 2.12 | 0.01 | SWN:NDR2_HUMAN Q9un36 homo sapiens (human). ndrg2 protein (syld709613 protein). 8/2001 [MASS=39289]/N-myc downstream-regulated gene 2, a member of the Ndr family, which are involved in cell differentiation                                                                                                                                                                                                                                                                                                                                                                                                                     |
| SW:NTF2_HUMAN  | NTF2     | 24            | 2  | 2.12 | 0.23 | SW:NTF2_HUMAN P13662 homo sapiens (human), and rattus norvegicus (rat). nuclear transport factor 2 (ntf-2) (placental protein 15) (pp15). 7/1999 [MASS=14478]/Nuclear transport factor 2, cytosolic protein involved in nuclear import of proteins containing nuclear localization signals mediated by GDP-RAN and nucleoporins                                                                                                                                                                                                                                                                                                   |
| SW:KC2B_HUMAN  | CSNK2B   | 5, 18, 34, 41 | 2  | 2.11 | 0.18 | SW:KC2B_HUMAN P13862 homo sapiens (human), mus musculus (mouse), rattus norvegicus (rat), bos taurus (bovine), sus scrofa (pig), oryctolagus cuniculus (rabbit), and gallus gallus (chicken). casein kinase [MASS=24942]/Casein kinase II beta subunit, regulatory subunit of casein kinase II (CK2), confers stability and specificity to CK2 catalytic subunits, may mediate formation of the tetrameric CK2 complex, and may be involved in heat stress response                                                                                                                                                               |
| GP:D21163_1    | U5-116KD | 25, 37, 38    | 1  | 2.11 | 0.00 | GP:D21163_1 Human mRNA for KIAA0031 gene, complete cds; similar to human elongation factor 2 mRNA (HSEF2).. [MASS=109436]/U5 snRNP-specific protein 116 kD, a spliceosome component with GTPase activity, plays a role in mRNA splicing and processing                                                                                                                                                                                                                                                                                                                                                                            |
| SW:RU17_HUMAN  | SNRP70   | 25, 37, 38    | 3  | 2.11 | 0.26 | SW:RU17_HUMAN P08621 homo sapiens (human). u1 small nuclear ribonucleoprotein 70 kda (u1 snrp 70 kda) (snrp70). 11/1995 [MASS=70081]/U1 small nuclear 70 kDa ribonucleoprotein, involved in pre mRNA splicing, acts as an autoantigen in systemic lupus erythematosus and mixed connective tissue disease                                                                                                                                                                                                                                                                                                                         |
| SW:CY1_HUMAN   | CYC1     | 18            | 2  | 2.10 | 0.00 | SW:CY1_HUMAN P08574 homo sapiens (human). cytochrome c1, heme protein precursor. 7/1999 [MASS=35390]/Cytochrome c1, a member of the cytochrome bc1 complex                                                                                                                                                                                                                                                                                                                                                                                                                                                                        |
| SW:NUPM_HUMAN  | NDUFA8   | 18            | 5  | 2.10 | 0.44 | SW:NUPM_HUMAN P51970 homo sapiens (human). nadh-ubiquinone oxidoreductase 19 kda subunit (ec 1.6.5.3) (ec 1.6.99.3) (complex i-19kd) (ci-19kd) (complex i-pgiv) (ci-pgiv). 5/2000 [MASS=19974]/NADH dehydrogenase ubiquinone 1 alpha subcomplex 8 (19 kDa), a subunit of NADH-ubiquinone oxidoreductase (complex I), a multiprotein complex that transports electrons from NADH to ubiquinone                                                                                                                                                                                                                                     |
| GP:AJ245620_1  | CTL1     | 45            | 1  | 2.08 | 0.00 | GP:AJ245620_1 Homo sapiens CTL1 gene. [MASS=73349]/CDW92 antigen; mutations in the corresponding gene may result in familial dysautonomia                                                                                                                                                                                                                                                                                                                                                                                                                                                                                         |
| SW:DDX6_HUMAN  | DDX6     | 35            | 3  | 2.06 | 0.72 | SW:DDX6_HUMAN P26196 homo sapiens (human). probable atp-dependent rna helicase p54 (oncogene rck) (dead box protein 6). 7/1998 [MASS=54418]/DEAD box protein 6, a member of the DEAD/H box ATP-dependent RNA helicase protein family, may be involved in cell proliferation, upregulated in colorectal adenocarcinoma and colonic adenoma; gene is translocated in a diffuse large B-cell lymphoma                                                                                                                                                                                                                                |
| SW:U2AF_HUMAN  | U2AF65   | 25, 37, 38    | 1  | 2.05 | 0.00 | SW:U2AF_HUMAN P26368 homo sapiens (human). splicing factor u2af 65 kda subunit (u2 auxiliary factor 65 kda subunit) (u2 snrnp auxiliary factor large subunit). 12/1998 [MASS=53501]/U2 small nuclear ribonucleoprotein auxiliary factor (65 kDa), a component of U2 small nucleoprotein auxiliary factor, which is necessary for mRNA splicing, binds to pre-mRNA                                                                                                                                                                                                                                                                 |
| GP:AF043250_1  | PLRG1    | 41            | 1  | 2.05 | 0.00 | Homo sapiens pleiotropic regulator 1 (PLRG1) mRNA/Member of the WD repeat protein family, interacts with a nuclear protein kinase C-beta II isoenzyme that is involved in insulin signaling                                                                                                                                                                                                                                                                                                                                                                                                                                       |
| SW:IDHP_HUMAN  | IDH2     | 5, 18         | 7  | 2.04 | 0.65 | SW:IDHP_HUMAN P48735 homo sapiens (human). isocitrate dehydrogenase [nadp], mitochondrial precursor (ec 1.1.1.42) (oxalosuccinate decarboxylase) (idh) (nadp+-specific icdh) (idp) (icd-m). 2/1996 [MASS=50948]/Isocitrate dehydrogenase 2 (NADP+) mitochondrial, catalyzes the oxidative decarboxylation of isocitrate to form alpha-ketoglutarate                                                                                                                                                                                                                                                                               |
| GP:AK025822_1  | FLJ22169 | 45            | 2  | 2.04 | 0.00 | GP:AK025822_1 Homo sapiens cDNA: FLJ22169 fis, clone HRC00632; unnamed protein product. [MASS=74624]/EST/Protein of unknown function, has low similarity to a region of S. cerevisiae Apg9p, which is required for starvation-induced autophagy                                                                                                                                                                                                                                                                                                                                                                                   |
| SW:SPHM_HUMAN  | SGSH     | 5, 26         | 1  | 2.03 | 0.00 | SW:SPHM_HUMAN P51688 homo sapiens (human). n-sulphoglucosamine sulphohydrolase precursor (ec 3.10.1.1) (sulfoglucosamine sulfamidase) (sulphamidase). 5/2000 [MASS=56695]/N-sulfo-glucosamine sulfohydrolase (sulfamidase), catalyzes the hydrolysis of the N-linked sulfate group from heparan sulfate; mutation of the corresponding gene causes the lysosomal storage disease Sanfilippo A syndrome (mucopolysaccharidosis type IIIA)                                                                                                                                                                                          |
| GP:AF242773_1  | unknown  | 45            | 1  | 2.03 | 0.00 | mesenchymal stem cell protein DSCD75                                                                                                                                                                                                                                                                                                                                                                                                                                                                                                                                                                                              |
| SWN:U123_HUMAN | PHF5A    | 45            | 1  | 2.03 | 0.00 | SWN:U123_HUMAN Q9uh06 homo sapiens (human). hypothetical 12.4 kda protein bk223h9.2. 8/2001 [MASS=12405]/Member of the UPF0123 uncharacterized protein family, has very strong similarity to uncharacterized rat Loc192246                                                                                                                                                                                                                                                                                                                                                                                                        |
| GP:AF007833_1  | ZFP67    | 29            | 1  | 2.03 | 0.00 | GP:AF007833_1 Homo sapiens kruppel-related zinc finger protein hcKrox mRNA, complete cds; zinc-finger transcription factor. [MASS=58218]/c-Krox, a zinc-finger domain-containing transcription factor that regulates transcription from the alpha 1(I) procollagen (COL1A1) and fibronectin (FN1) promoters, may play a role in regulating bone formation                                                                                                                                                                                                                                                                         |

|               |                 |            |    |      |      |                                                                                                                                                                                                                                                                                                                                                                                                                                                                                                                                                                       |
|---------------|-----------------|------------|----|------|------|-----------------------------------------------------------------------------------------------------------------------------------------------------------------------------------------------------------------------------------------------------------------------------------------------------------------------------------------------------------------------------------------------------------------------------------------------------------------------------------------------------------------------------------------------------------------------|
| SW:SMD2_HUMAN | SNRPD2          | 25, 37, 38 | 2  | 2.02 | 0.82 | SW:SMD2_HUMAN P43330 homo sapiens (human). small nuclear ribonucleoprotein sm d2 (snrnp core protein d2) (sm-d2). 10/1996 [MASS=13527]/Small nuclear ribonucleoprotein D2 polypeptide, one of seven common core snRNP proteins involved in snRNP biogenesis and pre-mRNA splicing, autoantigen for anti-Sm antibodies produced by individuals with systemic lupus erythematosus                                                                                                                                                                                       |
| PIR2:B53737   | SLC25A3         | 18, 42     | 21 | 2.02 | 0.42 | PIR2:B53737 phosphate carrier protein precursor, mitochondrial, splice form B - human [MASS=39959]/Mitochondrial phosphate carrier (solute carrier family 25 member 3), catalyzes the transport of phosphate from the cytoplasm to the mitochondrial matrix for ATP synthesis during oxidative phosphorylation                                                                                                                                                                                                                                                        |
| SW:RL24_HUMAN | RPL24           | 35         | 6  | 2.02 | 0.10 | SW:RL24_HUMAN P38663 homo sapiens (human), rattus norvegicus (rat), and bos taurus (bovine). 60s ribosomal protein L24 (L30). 5/2000 [MASS=17779]/Ribosomal protein L24, a putative component of the 60S ribosomal subunit                                                                                                                                                                                                                                                                                                                                            |
| GP:AF277719_1 | C(27)-3BETA-HSD | 26         | 1  | 2.02 | 0.00 | GP:AF277719_1 Homo sapiens 3 beta-hydroxy-delta 5-C27-steroid oxidoreductase mRNA, complete cds. [MASS=40930]/3 beta-hydroxy-delta 5-C27-steroid oxidoreductase, predicted to function in bile acid biosynthesis; variant form is associated with progressive intrahepatic cholestasis                                                                                                                                                                                                                                                                                |
| SW:DRN2_HUMAN | DNASE2          | 25         | 3  | 2.01 | 0.42 | SW:DRN2_HUMAN O00115 homo sapiens (human). deoxyribonuclease ii precursor (ec 3.1.22.1) (dnase ii) (acid dnase) (lysosomal dnase ii) (r31240_2). 7/1999 [MASS=39581]/Deoxyribonuclease II lysosomal, an acid-activated DNA nicking enzyme, may participate in DNA fragmentation during apoptosis, induces apoptotic chromosome condensation when transfected into cell lines                                                                                                                                                                                          |
| SW:RL40_HUMAN | UBA52           | 32, 34, 35 | 3  | 2.00 | 0.50 | SW:RL40_HUMAN P14793 homo sapiens (human), rattus norvegicus (rat), and gallus gallus (chicken). 60s ribosomal protein l40 (cep52). 11/1997 [MASS=6181]/Ubiquitin A-52 residue ribosomal protein fusion product 1, protein consisting of ubiquitin at the N-terminus and ribosomal protein L40 at the C-terminus; the corresponding gene is upregulated in colon cancer but not in gastric cancer                                                                                                                                                                     |
| GP:AL023805_1 | PLCB4           | 19, 41     | 6  | 2.00 | 0.24 | GP:AL023805_1 Human DNA sequence from clone RP4-811H13 on chromosome 20p12. Contains part of the PLCB4 gene for Phospholipase C beta 4, STSs, GSSs and a CpG island, complete sequence; combines with dJ1119D9.2.1 and .2 in Em:AL031652 to form isoforms 5 and 6; may a [MASS=61433]/1-phosphatidylinositol-4,5-bisphosphate phosphodiesterase beta 4/Phospholipase C beta 4, member of a G protein-regulated family of phospholipases that hydrolyze phosphatidylinositol 4,5-bisphosphate to the second messengers inositol 1,4,5-trisphosphate and diacylglycerol |
| SW:CATH_HUMAN | CTSH            | 32         | 1  | 2.00 | 0.00 | SW:CATH_HUMAN P09668 homo sapiens (human). cathepsin h precursor (ec 3.4.22.16). 7/1999 [MASS=37404]/Cathepsin H, a cysteine (thiol) protease, member of a family of lysosomal cysteine proteases involved in a variety of proteolytic processes, may serve as a marker of tumor progression in central nervous system and pancreatic neoplasms                                                                                                                                                                                                                       |
| SW:ETFB_HUMAN | ETFB            | 18, 19     | 2  | 1.99 | 0.48 | SW:ETFB_HUMAN P38117 homo sapiens (human). electron transfer flavoprotein beta-subunit (beta-etf). 5/2000 [MASS=27844]/Electron transfer flavoprotein beta subunit, shuttles electrons between primary flavoprotein dehydrogenases involved in mitochondrial fatty acid metabolism and ubiquinone oxidoreductase; genetic variants are associated with type II glutaric acidemia                                                                                                                                                                                      |
| GP:AB046803_1 | KIAA1583        | 45         | 6  | 1.99 | 0.11 | GP:AB046803_1 Homo sapiens mRNA for KIAA1583 protein, partial cds; Start codon is not identified.. [MASS=46775]/ EST                                                                                                                                                                                                                                                                                                                                                                                                                                                  |
| GP:S69272_1   | SERPINB6        | 45         | 5  | 1.99 | 0.08 | GP:S69272_1 cytoplasmic antiproteinase=38 kda intracellular serine proteinase inhibitor [human, placenta, mRNA, 1465 nt]; 38 kda intracellular serine proteinase inhibitor; This sequence comes from Fig. 1; CAP. [MASS=42590]/Serine proteinase inhibitor clade B member 6 (placental thrombin inhibitor), member of the serine proteinase inhibitor (serpin) superfamily, may play roles in keratinocyte differentiation and platelet activation                                                                                                                    |
| SW:POR2_HUMAN | VDAC2           | 42         | 34 | 1.99 | 0.32 | SW:POR2_HUMAN P45880 homo sapiens (human). voltage-dependent anion-selective channel protein 2 (hvac2) (outer mitochondrial membrane protein porin 2). 5/2000 [MASS=38093]/Voltage-dependent anion channel 2, a voltage-gated pore of the outer mitochondrial membrane, may bind hexokinase                                                                                                                                                                                                                                                                           |
| GP:AL035689_4 | HINT3           | 45         | 1  | 1.98 | 0.00 | GP:AL035689_4 Human DNA sequence from clone RP1-187J11 on chromosome 6q11.1-22.33. Contains the gene for a novel protein similar to S. pombe and S. cerevisiae predicted proteins, the gene for a novel protein similar to protein kinase C inhibitors, the 3' end of th [MASS=20361]/Member of the histidine triad (HIT) family                                                                                                                                                                                                                                      |
| SW:GLYM_HUMAN | SHMT2           | 2          | 8  | 1.98 | 0.70 | SW:GLYM_HUMAN P34897 homo sapiens (human). serine hydroxymethyltransferase, mitochondrial precursor (ec 2.1.2.1) (serine methylase) (glycine hydroxymethyltransferase) (shmt). 5/2000 [MASS=55993]/Serine hydroxymethyltransferase 2 (mitochondrial), a pyridoxal phosphate-dependent enzyme that catalyzes the conversion of serine and tetrahydrofolate to glycine and 5,10-methylenetetrahydrofolate, may play a role in glycine biosynthesis                                                                                                                      |
| GP:U28811_1   | CFR-1           | 6, 36      | 14 | 1.97 | 0.53 | Human cysteine-rich fibroblast growth factor receptor (CFR-1) mRNA/Golgi apparatus protein 1, a cysteine-rich membrane sialoglycoprotein that may be a receptor for fibroblast growth factor (FGF), may be involved in cell adhesion                                                                                                                                                                                                                                                                                                                                  |
| SW:ECHA_HUMAN | HADHA           | 18, 19, 42 | 13 | 1.97 | 0.65 | SW:ECHA_HUMAN P40939 homo sapiens (human). mitochondrial trifunctional enzyme alpha subunit precursor (tp-alpha) [includes: long-chain enoyl-coa hydratase (ec 4.2.1.17); long chain 3-hydroxyacyl-coa deh [MASS=82960]/Mitochondrial long-chain enoyl-CoA hydratase/3-hydroxyacyl-CoA dehydrogenase/3-ketoacyl-CoA thiolase alpha subunit, involved in fatty acid beta-oxidation, mutations are associated with trifunctional protein deficiency and Reye-like syndrome                                                                                              |
| PIR2:A49656   | ZNF147          | 45         | 1  | 1.97 | 0.00 | estrogen-responsive finger protein/Zinc finger protein 147, an estrogen-responsive zinc-finger transcription factor required for estrogen induced cell proliferation and may mediate estrogen action                                                                                                                                                                                                                                                                                                                                                                  |
| GP:AB007867_1 | PLXNB1          | 41         | 1  | 1.97 | 0.00 | GP:AB007867_1 Homo sapiens KIAA0407 mRNA, complete cds. [MASS=232298]/Plexin B1 (plexin 5), a member of the plexin family of semaphorin receptors which are involved in axon guidance, receptor for semaphorin 4D (SEMA4D), functions in RAC and RHO signal transduction pathways and in actin cytoskeleton reorganization                                                                                                                                                                                                                                            |



|               |          |                |    |      |      |                                                                                                                                                                                                                                                                                                                                                                                                                                                                            |
|---------------|----------|----------------|----|------|------|----------------------------------------------------------------------------------------------------------------------------------------------------------------------------------------------------------------------------------------------------------------------------------------------------------------------------------------------------------------------------------------------------------------------------------------------------------------------------|
| SW:COX1_HUMAN | MTCO1    | 18             | 1  | 1.97 | 0.00 | SW:COX1_HUMAN P00395 homo sapiens (human). cytochrome c oxidase polypeptide i (ec 1.9.3.1). 5/2000 [MASS=57041]/Mitochondrial cytochrome c oxidase subunit I, a subunit of complex IV of the mitochondrial respiratory chain; mutations in the corresponding gene may be associated with mitochondrial diseases and acquired idiopathic sideroblastic anemia                                                                                                               |
| SW:MAOM_HUMAN | ME2      | 5, 19          | 2  | 1.96 | 0.04 | SW:MAOM_HUMAN P23368 homo sapiens (human). nad-dependent malic enzyme, mitochondrial precursor (ec 1.1.1.38) (nad-me). 5/2000 [MASS=65444]/Malic enzyme 2, a NAD(+)-dependent mitochondrial form of malic enzyme, catalyzes the oxidative decarboxylation of malate to form pyruvate                                                                                                                                                                                       |
| SW:G732_HUMAN | TACSTD1  | 45             | 22 | 1.96 | 0.30 | SW:G732_HUMAN P16422 homo sapiens major gastrointestinal tumor-associated protein ga733-2 precursor (epithelial cell surface antigen) (epithelial glycoprotein) (egp) (adenocarcinoma-associated antigen) [MASS=34920]/Tumor-associated calcium signal transducer 1 (Epithelial cell adhesion molecule), a surface glycoprotein that mediates homotypic calcium-independent cell adhesion, acts in pancreas morphogenesis, present on most carcinomas                      |
| SW:TDXM_HUMAN | PRDX3    | 10             | 4  | 1.96 | 0.16 | SW:TDXM_HUMAN P30048 homo sapiens (human). mitochondrial thioredoxin-dependent peroxide reductase precursor (antioxidant protein 1) (aop-1) (mer5 protein homolog) (hbc189). 5/2000 [MASS=27693]/Peroxiredoxin 3, a mitochondrial antioxidant protein involved in oxygen and radical metabolism, has an antiapoptotic function, and inactivated by the apoptosis-inducing lectin abrin A                                                                                   |
| GP:U64791_1   | GLG1     | 6, 36          | 1  | 1.95 | 0.00 | GP:U64791_1 Human Golgi membrane sialoglycoprotein MG160 (GLG1) mRNA, complete cds; fibroblast growth factor. [MASS=134593]/Golgi apparatus protein 1, a cysteine-rich membrane sialoglycoprotein that may be a receptor for fibroblast growth factor (FGF), may be involved in cell adhesion                                                                                                                                                                              |
| SW:COPA_HUMAN | COPA     | 43             | 15 | 1.95 | 3.01 | SW:COPA_HUMAN P53621 homo sapiens (human). coatomer alpha subunit (alpha-coat protein) (alpha-cop) (hepcop) (hepcop) [contains: xenin (xenopsin-related peptide); proxenin]. 5/2000 [MASS=138332]/ Coatomer protein complex subunit alpha, involved in transport between the endoplasmic reticulum and the Golgi apparatus, binds to RNA, N-terminal 25 amino acids may be cleaved to release the peptide xenin, which stimulates pancreatic secretion                     |
| SW:ITB1_HUMAN | ITGB1    | 6, 7, 41       | 5  | 1.94 | 0.58 | SW:ITB1_HUMAN P05556 homo sapiens (human). fibronectin receptor beta subunit precursor (integrin beta-1) (cd29) (integrin via-4 beta subunit). 7/1999 [MASS=88465]/Integrin beta 1, involved in extracellular matrix interactions and signal transduction, plays roles in cell adhesion, migration, proliferation and development, may be involved in tumor metastasis                                                                                                     |
| SW:LYAG_HUMAN | GAA      | 5, 18          | 2  | 1.94 | 0.01 | SW:LYAG_HUMAN P10253 homo sapiens (human). lysosomal alpha-glucosidase precursor (ec 3.2.1.20) (acid maltase). 5/2000 [MASS=105338]/Acid alpha-glucosidase, lysosomal alpha-glucosidase that hydrolyzes alpha(1->4) and alpha(1->6) linkages in glycogen during glycogen catabolism; heritable deficiency causes glycogenosis type II or Pompe disease                                                                                                                     |
| PIR2:S78046   | RNASE6   | 25, 39         | 3  | 1.94 | 0.00 | PIR2:S78046 ribonuclease 6 (EC 3.1.27.-) precursor - human [MASS=21941]/Ribonuclease k6, a ribonuclease of the ribonuclease A superfamily, possibly functions in host defense                                                                                                                                                                                                                                                                                              |
| SW:ANK1_HUMAN | ANK1     | 11             | 4  | 1.94 | 0.82 | SW:ANK1_HUMAN P16157 homo sapiens (human). ankyrin 1 (erythrocyte ankyrin) (ankyrin r) (ankyrins 2.1 and 2.2). 5/2000 [MASS=206146]/Ankyrin 1, a cytoskeletal anchor protein that attaches cytoskeletal elements to the plasma membrane; alteration of the corresponding gene is associated with hereditary spherocytosis                                                                                                                                                  |
| GP:AK000501_1 | P17.3    | 45             | 1  | 1.93 | 0.00 | similar to neuronal protein 15.6/Protein of unknown function, has high similarity to uncharacterized mouse Np15.6                                                                                                                                                                                                                                                                                                                                                          |
| SW:ROA3_HUMAN | FBRNP    | 37             | 2  | 1.93 | 0.06 | SW:ROA3_HUMAN P51991 homo sapiens (human). heterogeneous nuclear ribonucleoprotein a3 (hnrp a3) (fbrnp) (d10s102). 7/1999 [MASS=39686]/Protein with similarity to heterogeneous ribonucleoproteins, contains RRM (RNA recognition motif) domains                                                                                                                                                                                                                           |
| PIR2:I55595   | RNPC2    | 25, 37, 38     | 1  | 1.92 | 0.00 | PIR2:I55595 splicing factor - human [MASS=58657]/Splicing factor CC1.3, a novel nuclear protein and putative member of the SR family of alternative splicing factors; target of autoantibodies from a patient with hepatocellular carcinoma                                                                                                                                                                                                                                |
| GP:AF154502_1 | DPP7     | 45             | 2  | 1.90 | 0.01 | Similar to dipeptidyl peptidase 7/Dipeptidyl peptidase 7 (quiescent cell proline dipeptidase), a serine protease that cleaves N-terminal Xaa-Pro dipeptides, member of a family of post proline cleaving exopeptidases, may play a role in inhibition of apoptosis in quiescent lymphocytes                                                                                                                                                                                |
| GP:AF177344_1 | FLJ10581 | 25, 37         | 1  | 1.89 | 0.00 | GP:AF177344_1 Homo sapiens clone HC90 unknown mRNA. [MASS=30998]/ weakly similar to a methyltransferase/Member of the RNA methyltransferase family, which catalyze 2'-O-methylation of ribose groups in R                                                                                                                                                                                                                                                                  |
| PIR2:T09073   | SFRS2IP  | 16, 25, 38, 31 | 1  | 1.89 | 0.00 | PIR2:T09073 splicing factor Sip1 - human [MASS=128875]/Splicing factor arginine serine rich 2 interacting protein, a SR domain family protein that interacts with the RNA polymerase II C-terminal domain and several splicing factors, is essential in mRNA splicing and possibly spliceosome A-complex formation                                                                                                                                                         |
| SW:CNBP_HUMAN | ZNF9     | 19, 29         | 2  | 1.87 | 0.27 | SW:CNBP_HUMAN P20694 homo sapiens (human), and rattus norvegicus (rat). cellular nucleic acid binding protein (cnbp). 11/1997 [MASS=19463]/Zinc-finger protein that binds to sterol regulatory element (SRE) and may function in sterol-mediated repression of genes encoding the low density lipoprotein receptor and enzymes of the cholesterol biosynthetic pathway                                                                                                     |
| SW:ECHB_HUMAN | HADHB    | 18, 19, 42     | 4  | 1.87 | 0.07 | SW:ECHB_HUMAN P55084 homo sapiens (human). trifunctional enzyme beta subunit, mitochondrial precursor (tp-beta) [includes: 3-ketoacyl-coa thiolase (ec 2.3.1.16) (acetyl-coa acyltransferase) (beta-ketothl [MASS=51294]/3-hydroxyacyl-CoA dehydrogenase, 3-ketoacyl-CoA thiolase trifunctional protein beta subunit, involved in fatty acid beta-oxidation; variants are associated with trifunctional protein deficiency, sudden infant death syndrome and liver failure |
| SW:NUAM_HUMAN | NDUFS1   | 18             | 1  | 1.87 | 0.00 | SW:NUAM_HUMAN P28331 homo sapiens (human). nadh-ubiquinone oxidoreductase 75 kda subunit precursor (ec 1.6.5.3) (ec 1.6.99.3) (complex i-75kd) (ci-75kd). 7/1999 [MASS=79574]/NADH-dehydrogenase ubiquinone Fe-S protein 1 (75kd), a multiprotein complex that transports electrons from NADH to ubiquinone, present within the hydrophobic fraction of complex I; genetic variants are associated with mitochondrial complex I deficiency                                 |
| PIR2:A55575   | ANK3     | 11, 43         | 9  | 1.85 | 0.18 | PIR2:A55575 ankyrin 3, long splice form - human [MASS=480403]/Ankyrin 3 (ankyrin G), may link integral membrane proteins to the cytoskeleton, may play a role in localizing sodium channels to the axonal initial segment and nodes of Ranvier, may play a role in vesicle transport                                                                                                                                                                                       |

|                |          |            |   |      |      |                                                                                                                                                                                                                                                                                                                                                                                                                                                                          |
|----------------|----------|------------|---|------|------|--------------------------------------------------------------------------------------------------------------------------------------------------------------------------------------------------------------------------------------------------------------------------------------------------------------------------------------------------------------------------------------------------------------------------------------------------------------------------|
| SWN:JAM1_HUMAN | JAM1     | 6          | 9 | 1.85 | 0.84 | SWN:JAM1_HUMAN Q9y624 homo sapiens (human). junctional adhesion molecule precursor (jam) (platelet adhesion molecule 1) (pam-1) (platelet f11 receptor). 8/2001 [MASS=32583]/Junctional adhesion molecule 1, participates in platelet adhesion and aggregation and may play roles in intracellular signaling, the assembly of tight junctions, and the inflammatory response, may be involved in the pathogenesis of immune thrombocytopenia                             |
| SW:ASNS_HUMAN  | ASNS     | 2          | 1 | 1.85 | 0.00 | SW:ASNS_HUMAN P08243 homo sapiens (human). asparagine synthetase [glutamine-hydrolyzing] (ec 6.3.5.4) (glutamine-dependent asparagine synthetase) (ts11 cell cycle control protein). 2/1996 [MASS=64299]/Asparagine synthase, catalyzes ATP-dependent conversion of aspartate to asparagine using an amine group from glutamine or ammonia, expression is induced upon amino acid and glucose deprivation and induction increases cancer cell resistance to chemotherapy |
| SW:ADT1_HUMAN  | SLC25A4  | 18, 42     | 2 | 1.84 | 0.94 | SW:ADT1_HUMAN P12235 homo sapiens (human). adp,atp carrier protein, heart/skeletal muscle isoform t1 (adp/atp translocase 1) (adenine nucleotide translocator 1) (ant 1). 10/1994 [MASS=33064]/Solute carrier family 25 member 4, an ADP:ATP transporter that may act in mitochondrial genome stability, altered transport capacity due to autoimmune response leads to myocarditis and cardiomyopathy; mutation causes progressive external ophthalmoplegia             |
| GP:AB043007_1  | SDF2L1   | 45         | 2 | 1.84 | 0.06 | GP:AB043007_1 Homo sapiens SDF2L1 mRNA for SDF2 like protein 1, complete cds. [MASS=23511]/Stromal cell-derived factor 2-like 1, a member of the protein-O-mannosyltransferase-rotated abdomen (pmt-rt) family, contains three MIR (protein mannosyltransferase, IP3R and RyR) domains and a C-terminal ER retention signal                                                                                                                                              |
| SW:ADRO_HUMAN  | FDXR     | 18, 19     | 1 | 1.82 | 0.00 | SW:ADRO_HUMAN P22570 homo sapiens (human). nadph:adrenodoxin oxidoreductase precursor (ec 1.18.1.2) (adrenodoxin reductase) (ferredoxin-nadp(+)) reductase). 7/1999 [MASS=53809]/Ferredoxin reductase, mitochondrial flavoprotein that mediates electron transport from NADPH to cytochrome P450scc                                                                                                                                                                      |
| SW:DDX9_HUMAN  | DDX9     | 45         | 2 | 1.82 | 0.00 | SW:DDX9_HUMAN Q08211 homo sapiens (human). atp-dependent rna helicase a (nuclear dna helicase ii) (ndh ii) (dead box protein 9). 12/1998 [MASS=140877]/DEAD box protein 9 (RNA helicase A), ATP-dependent RNA and DNA helicase, involved in HIV replication and transcription, and retroviral mRNA nuclear export; present as an autoantigen in patients with systemic lupus erythematosus                                                                               |
| GP:AB032903_1  | LOC51292 | 10         | 1 | 1.81 | 0.00 | GP:AB032903_1 Homo sapiens GMPR2 mRNA for guanosine monophosphate reductase isolog, complete cds. [MASS=37874]/Guanosine monophosphate reductase, enzyme with a predicted role in purine interconversion                                                                                                                                                                                                                                                                 |
| SW:AGAL_HUMAN  | GLA      | 5, 19      | 1 | 1.80 | 0.00 | SW:BDH_HUMAN P06280 homo sapiens (human). alpha-galactosidase a precursor (ec 3.2.1.22) (melibiase) (alpha-d-galactoside galactohydrolase) (alpha-d-galactosidase a). 7/1998 [MASS=48767]/Alpha-galactosidase A (alpha-D-galactoside galactohydrolase), hydrolyzes glycosphingolipids to release alpha-D-galactosyl residues; mutation of the corresponding gene causes Fabry disease                                                                                    |
| SW:RB48_HUMAN  | RBBP4    | 12, 34     | 1 | 1.80 | 0.00 | SW:RB48_HUMAN Q09028 homo sapiens (human). chromatin assembly factor 1 p48 subunit (caf-1 p48 subunit) (retinoblastoma binding protein p48) (retinoblastoma-binding protein 4) (msi1 protein homolog). 12/ [MASS=47656]/Retinoblastoma binding protein 4, a nuclear protein that forms complexes with a variety of proteins including RB1, HDAC1, BRCA1, E2F, which function in histone acetylation, regulation of cell proliferation, or transcriptional repression     |
| GP:AB039669_1  | ALEX3    | 45         | 4 | 1.80 | 0.19 | GP:AB039669_1 Homo sapiens mRNA for ALEX3, complete cds; similar to ALEX1 protein. [MASS=42501]/a novel human armadillo repeat containing protein/Arm proteins lost in epithelial cancers on chromosome X 3, a member of the ALEX protein family, contains a single armadillo-like (Arm) repeat and N-terminal hydrophobic residues that suggests it may be a membrane-associated protein                                                                                |
| SW:RL44_HUMAN  | RPL44    | 35         | 4 | 1.80 | 0.47 | SW:RL44_HUMAN P09896 homo sapiens (human), rattus norvegicus (rat), mus musculus (mouse), and sus scrofa (pig). 60s ribosomal protein l44 (l36a). 7/1998 [MASS=12310]/Ribosomal protein L44, a component of the 60S ribosomal subunit; has very strong similarity to Rpl36a, which may be part of the peptidyl transferase center                                                                                                                                        |
| GP:AF041483_1  | H2AFY    | 12         | 1 | 1.80 | 0.00 | GP:AF041483_1 Homo sapiens histone macroH2A1.2 mRNA, complete cds. [MASS=39601]/H2A histone family member Y, a histone H2A subtype containing a unique non-histone domain, involved in compaction of DNA into nucleosomes and X chromosome inactivation                                                                                                                                                                                                                  |
| SWN:ZH10_HUMAN | ZNF345   | 45         | 1 | 1.79 | 0.00 | SWN:ZH10_HUMAN Q14585 homo sapiens (human). zinc finger protein hzf10. 8/2001 [MASS=55383]/Zinc finger protein 345, a Kruppel-related zinc protein                                                                                                                                                                                                                                                                                                                       |
| SW:RUXF_HUMAN  | SNRPF    | 25, 37, 38 | 1 | 1.76 | 0.00 | SW:RUXF_HUMAN Q15356 homo sapiens (human). small nuclear ribonucleoprotein f (snrnp-f) (sm protein f). 7/1999 [MASS=9725]/Sm protein F, a spliceosomal snRNA-associated Sm core protein that is involved in the biogenesis of the snRNPs; a target of autoantibodies in patients with the autoimmune disease systemic lupus erythematosus                                                                                                                                |
| GP:AF157317_1  | LOC55829 | 45         | 1 | 1.76 | 0.00 | GP:AF157317_1 Homo sapiens AD-015 protein mRNA, complete cds; protein x 0008. [MASS=22864]/ similar to mouse minor histocompatibility antigen precursor/Protein of unknown function                                                                                                                                                                                                                                                                                      |
| GP:AF161507_1  | MRPL22   | 45         | 1 | 1.76 | 0.00 | GP:AF161507_1 Homo sapiens HSPC158 mRNA, complete cds. [MASS=26192]/mitochondrial ribosomal protein L22/Mitochondrial ribosomal protein L22, a putative structural protein of the mitochondrial large 39S ribosomal subunit, may play a role in protein biosynthesis                                                                                                                                                                                                     |
| SW:BDH_HUMAN   | BDH      | 5          | 4 | 1.76 | 0.25 | SW:BDH_HUMAN Q02338 homo sapiens (human). d-beta-hydroxybutyrate dehydrogenase precursor (ec 1.1.1.30) (bdh) (3-hydroxybutyrate dehydrogenase) (fragment). 12/1998 [MASS=38137]/D-beta-hydroxybutyrate dehydrogenase, a member of the short-chain alcohol dehydrogenase superfamily that requires phosphatidylcholine as an allosteric activator, involved carbohydrate and fatty acid metabolism                                                                        |
| GP:AC003972_1  | RENT1    | 25, 37, 39 | 1 | 1.74 | 0.00 | GP:AC003972_1 Homo sapiens DNA from chromosome 19, cosmid R33485 containing pNORF1, complete sequence; human type 1 RNA helicase; DPS similarity to (U59323) type 1 RNA helicase pNORF1 [Homo sapiens]; Score. [MASS=123036]/regulator of nonsense transcripts 1 (nonsense mrna reducing factor 1) (norf1) (up-frameshift suppressor 1 homolog). 10/2001 [MASS=124345]                                                                                                   |

|               |           |                |    |      |      |                                                                                                                                                                                                                                                                                                                                                                                                                                                                               |
|---------------|-----------|----------------|----|------|------|-------------------------------------------------------------------------------------------------------------------------------------------------------------------------------------------------------------------------------------------------------------------------------------------------------------------------------------------------------------------------------------------------------------------------------------------------------------------------------|
| PIR2:A57099   | PRKDC     | 14, 34, 40     | 13 | 1.74 | 0.27 | PIR2:A57099 DNA-activated protein kinase, catalytic subunit - human [MASS=465428]/DNA-dependent protein kinase catalytic subunit, a DNA-binding protein kinase involved in DNA double-strand break repair and somatic recombination of antibody genes; absence of mouse Prkdc is associated with severe combined immunodeficiency                                                                                                                                             |
| SW:DHB4_HUMAN | HSD17B4   | 19             | 12 | 1.74 | 0.52 | SW:DHB4_HUMAN P51659 homo sapiens (human). estradiol 17 beta-dehydrogenase 4 (ec 1.1.1.62) (17-beta-hsd 4) (17-beta-hydroxysteroid dehydrogenase 4). 11/1997 [MASS=79686]/Type IV 17 beta-hydroxysteroid dehydrogenase, a peroxisomal multifunctional enzyme with estradiol 17 beta-dehydrogenase and D-3 hydroxyacyl CoA dehydratase activities, involved in steroid and bile acid metabolism                                                                                |
| SW:BUB3_HUMAN | BUB3      | 7, 23          | 2  | 1.73 | 0.02 | SW:BUB3_HUMAN O43684 homo sapiens (human). mitotic checkpoint protein bub3. 5/2000 [MASS=37155]/Budding uninhibited by benzimidazoles 3 homolog, involved in the mitotic spindle checkpoint, localization to unattached kinetochores suggests a role in detecting microtubule attachment, required for the localization of BUB1 and BUB1B to kinetochores                                                                                                                     |
| PIR2:I53799   | KTN1      | 43             | 2  | 1.73 | 0.08 | PIR2:I53799 CG1 protein - human [MASS=149611]/human kinectin/Kinectin, functions as a receptor for the microtubule-motor protein kinesin and plays a role in intracellular movement of organelles; mutations in the corresponding gene are associated with childhood papillary thyroid carcinoma                                                                                                                                                                              |
| SW:ATCP_HUMAN | ATP2B1    | 42             | 21 | 1.73 | 0.61 | SW:ATCP_HUMAN P20020 homo sapiens (human). calcium-transporting atpase plasma membrane, isoform 1b (ec 3.6.1.38) (calcium pump) (pmca1b). 5/2000 [MASS=134685]/ATPase Ca++ transporting plasma membrane 1, a member of the P type primary ion transport ATPase family, a housekeeping gene, alternatively spliced isoforms show differential tissue expression; candidate gene for hereditary hearing impairment                                                              |
| SW:CAN1_HUMAN | CAPN1     | 41             | 1  | 1.73 | 0.00 | SW:CAN1_HUMAN P07384 homo sapiens (human). calpain 1, large [catalytic] subunit (ec 3.4.22.17) (calcium-activated neutral proteinase) (canp) (mu-type). 10/1996 [MASS=81890]/Calpain I, catalytic subunit of mu-calpain, a calcium-dependent cysteine (thiol) protease that requires micromolar concentrations of calcium in vitro                                                                                                                                            |
| SW:PCB2_HUMAN | PCBP2     | 37             | 10 | 1.73 | 0.20 | SW:PCB2_HUMAN Q15366 homo sapiens (human). poly(rc)-binding protein 2 (hnmp-e2). 5/2000 [MASS=38580]/Poly(rc)-binding protein 2, poly(rc) and poly(U)-binding protein, involved in the translational regulation of poliovirus, papillomavirus, and hepatitis C virus transcripts                                                                                                                                                                                              |
| PIR2:JW0079   | HNRPDL    | 25, 37         | 1  | 1.72 | 0.00 | PIR2:JW0079 heterogeneous nuclear ribonucleoprotein homolog JKTBP [imported] - human [MASS=33589]/Heterogeneous nuclear ribonucleoprotein D-like, an RNA- and DNA-binding protein that may play a role in mRNA biogenesis                                                                                                                                                                                                                                                     |
| GP:AK024512_1 | FLJ20859  | 45             | 1  | 1.71 | 0.00 | GP:AK024512_1 Homo sapiens cDNA: FLJ20859 fis, clone ADKA01617; unnamed protein product. [MASS=50734]/ probable ATPase/ EST/Protein of unknown function, has low similarity to uncharacterized C. elegans F32A7.4                                                                                                                                                                                                                                                             |
| GP:AF214737_1 | C9orf10   | 45             | 10 | 1.70 | 0.57 | homo sapiens (human). protein c9orf10/EST/Protein of unknown function, has weak similarity to uncharacterized human KIAA1838                                                                                                                                                                                                                                                                                                                                                  |
| SW:GDIB_HUMAN | GDI2      | 43             | 2  | 1.70 | 0.01 | SW:GDIB_HUMAN P50395 homo sapiens (human). rab gdp dissociation inhibitor beta (rab gdi beta) (gdi-2). 7/1998 [MASS=50664]/Guanosine diphosphate dissociation inhibitor 2, one of a family proteins that regulate GDP/GTP cycle and are involved in intracellular vesicular trafficking, associates with RAB1B, RAB5 and RAB6 and may play a role in their intracellular targeting                                                                                            |
| SW:IF2B_HUMAN | EIF2S2    | 35             | 2  | 1.70 | 0.48 | SW:IF2B_HUMAN P20042 homo sapiens (human). eukaryotic translation initiation factor 2 beta subunit (eif-2-beta). 7/1999 [MASS=38400]/Eukaryotic translation initiation factor 2 subunit 2, the beta subunit of eIF2, a translation initiation factor, involved in the initiation of protein synthesis, binds GDP                                                                                                                                                              |
| PIR2:T42692   | LOC221927 | 45             | 1  | 1.69 | 0.00 | PIR2:T42692 hypothetical protein DKFZp434D0428.1 - human (fragment) [MASS=51316]                                                                                                                                                                                                                                                                                                                                                                                              |
| SW:R37A_HUMAN | RPL37A    | 35             | 2  | 1.69 | 0.23 | SW:R37A_HUMAN P12751 homo sapiens (human), rattus norvegicus (rat), and mus musculus (mouse). 60s ribosomal protein l37a. 2/1996 [MASS=10144]/Ribosomal protein L37a, component of the large 60S ribosomal subunit                                                                                                                                                                                                                                                            |
| SW:P60_HUMAN  | HSPD1     | 33             | 22 | 1.69 | 0.31 | SW:P60_HUMAN P10809 homo sapiens (human). mitochondrial matrix protein p1 precursor (p60 lymphocyte protein) (60 kda chaperonin) (heat shock protein 60) (hsp-60) (protein cpn60) (groel protein) (hucha60 [MASS=61055]/Chaperonin 60, mitochondrial matrix protein induced by stress, component of the chaperonin complex that is implicated in mitochondrial protein folding and function, induced by inflammatory and immune responses, and implicated in coronary disease |
| SW:AOPA_HUMAN | MAOA      | 2, 26          | 15 | 1.68 | 0.50 | (human). amine oxidase [flavin-containing] a (ec 1.4.3.4) (monoamine oxidase) (mao-a). 12/1998 [MASS=59682]/Monoamine oxidase A, an enzyme involved in degradation of amine neurotransmitters, may be associated with neuropsychiatric disorders, including impulsive aggression and panic disorder, and Parkinson disease                                                                                                                                                    |
| GP:AF111168_3 | C14orf3   | 45             | 2  | 1.68 | 0.01 | EST/Protein of unknown function, has moderate similarity to uncharacterized C. elegans C01G10.8                                                                                                                                                                                                                                                                                                                                                                               |
| SW:DDX1_HUMAN | DDX1      | 16, 25, 35, 37 | 6  | 1.67 | 0.10 | SW:DDX1_HUMAN Q92499 homo sapiens (human). dead box protein 1 (dead box protein-retinoblastoma) (dbp-rb). 5/2000 [MASS=82432]/DEAD box protein 1, a member of the DEAD-H box ATP-dependent RNA helicase protein family, plays a role in the processing of pre-mRNAs, may interact with CSTF2; corresponding gene is coamplified with MYC in some neuroblastoma and retinoblastoma cell lines                                                                                  |
| GP:AL035413_5 | KIAA0090  | 45             | 1  | 1.67 | 0.00 | GP:AL035413_5 Human DNA sequence from clone RP4-657E11 on chromosome 1p35.1-36.23 Contains 3' part of the CAPZB (capping protein (actin filament) muscle Z-line, beta) gene, genes for aldo-keto reductase family 7 (afatoxin aldehyde reductase) members A2 (AKR7A2) a [MASS=95553]/ EST/Protein of unknown function                                                                                                                                                         |
| SW:FRIH_HUMAN | FTH1      | 26             | 7  | 1.67 | 0.26 | SW:FRIH_HUMAN P02794 homo sapiens (human). ferritin heavy chain (ferritin h subunit). 7/1999 [MASS=21094]/Ferritin heavy polypeptide 1, a ferrioxidase involved in iron storage, heme biosynthesis, cell growth, oxidative stress response, and transcription, may play a role in iron transport, apoptosis, cell differentiation, and response to bacteria                                                                                                                   |

|               |         |               |    |      |      |                                                                                                                                                                                                                                                                                                                                                                                                                                                                                          |
|---------------|---------|---------------|----|------|------|------------------------------------------------------------------------------------------------------------------------------------------------------------------------------------------------------------------------------------------------------------------------------------------------------------------------------------------------------------------------------------------------------------------------------------------------------------------------------------------|
| SW:HCD2_HUMAN | HADH2   | 19            | 4  | 1.67 | 0.12 | SW:HCD2_HUMAN Q99714 homo sapiens (human). 3-hydroxyacyl-coa dehydrogenase type ii (ec 1.1.1.35) (endoplasmic reticulum-associated amyloid beta-peptide binding protein) (short- chain type dehydrogenase/ [MASS=26923]/Hydroxyacyl-Coenzyme A dehydrogenase (type II), catalyzes the oxidation of steroids and alcohols, binds amyloid-beta protein; overexpressed and mediates neurotoxicity of Alzheimer's disease, mutation in the corresponding gene causes hyperinsulinism         |
| GP:U17032_1   | ARHGAP5 | 6, 41         | 1  | 1.66 | 0.00 | GP:U17032_1 Human p190-B (p190-B) mRNA, complete cds; member of the Rho GAP family, [MASS=171569]/Rho GTPase activating protein 5/Rho GTPase-activating protein (GAP) 5, has GAP activity for ARHA, RAC1 and CDC42, which are ras-related GTP binding proteins of the rho subfamily; may be involved in the integrin receptor signaling pathway and in cell adhesion                                                                                                                     |
| SW:PTK7_HUMAN | PTK7    | 34, 41        | 9  | 1.66 | 0.30 | SW:PTK7_HUMAN Q13308 homo sapiens (human). tyrosine-protein kinase-like 7 precursor (colon carcinoma kinase-4) (cck-4). 5/2000 [MASS=118260]/Protein tyrosine kinase 7 (colon carcinoma kinase-4), a glycosylated member of the receptor protein tyrosine kinase family that may be involved in tumorigenesis, likely to be catalytically inactive due to alterations within the RTK consensus sequences                                                                                 |
| SW:ROH1_HUMAN | HNRPH1  | 25, 37        | 4  | 1.66 | 0.22 | SW:ROH1_HUMAN P31943 homo sapiens (human). heterogeneous nuclear ribonucleoprotein h (hnrrp h). 11/1997 [MASS=49229]/Heterogeneous nuclear ribonucleoprotein H1, a pre-mRNA splicing factor that is a component of a complex that mediates post-transcriptional processing of primary transcripts                                                                                                                                                                                        |
| GP:AF161494_1 | MRPL15  | 45            | 3  | 1.66 | 0.06 | GP:AF161494_1 Homo sapiens HSPC145 mRNA, complete cds. [MASS=33420]/mitochondrial ribosomal protein L15/Protein containing a ribosomal protein L15 family amino terminal domain, has a region of moderate similarity to a region of S. cerevisiae Mrpl10p, which is a mitochondrial ribosomal protein of the large subunit (YmL10)                                                                                                                                                       |
| SW:MCM4_HUMAN | MCM4    | 7, 15         | 3  | 1.65 | 0.14 | SW:MCM4_HUMAN P33991 homo sapiens (human). dna replication licensing factor mcm4 (cdc21 homolog) (p1-cdc21). 5/2000 [MASS=96611]/Minichromosome maintenance deficient 4, forms a single stranded ATP-dependent DNA helicase with MCM6 and MCM7, may monitor sites of unreplicated DNA, displacement from replicated chromatin may ensure that DNA is only replicated once per cell cycle                                                                                                 |
| SW:C1TC_HUMAN | MTHFD1  | 26            | 6  | 1.65 | 0.45 | SW:C1TC_HUMAN P11586 h c-1-tetrahydrofolate synthase, cytoplasmic (c1-thf synthase) [includes: methylenetetrahydrofolate dehydrogenase (ec 1.5.1.5); methenyltetrahydrofolate cyclohydrolase (ec 3.5.4.9); [MASS=101428]/C1-Tetrahydrofolate synthase, a trifunctional enzyme with 10-formyltetrahydrofolate synthetase, 5,10-methenyltetrahydrofolate cyclohydrolase, and 5,10-methylenetetrahydrofolate dehydrogenase activities; mutation associated with risk of neural tube disease |
| SW:CUL2_HUMAN | CUL2    | 7, 23, 32     | 1  | 1.64 | 0.00 | SW:CUL2_HUMAN Q13617 homo sapiens (human). cullin homolog 2 (cul-2). 12/1998 [MASS=86956]/Cullin 2, has E3 ubiquitin ligase activity when present in a complex containing von Hippel Lindau tumor suppressor (VHL)- e1ogin B (TCEB2)- e1ogin C (TCEB1); modification by ubiquitin-like protein NEDD8 may be important for VHL tumor suppressor function                                                                                                                                  |
| SW:ROA0_HUMAN | HNRPA0  | 25, 37        | 2  | 1.64 | 0.40 | SW:ROA0_HUMAN Q13151 homo sapiens (human). heterogeneous nuclear ribonucleoprotein a0 (hnrrp a0). 5/2000 [MASS=30841]/Heterogeneous nuclear ribonucleoprotein A0, has triplet repeats, two consensus sequence-type RNA-binding domains, and a glycine-rich auxiliary domain, found in low abundance hnRNP complexes                                                                                                                                                                      |
| SW:RL14_HUMAN | RPL14   | 35            | 23 | 1.63 | 0.47 | SW:RL14_HUMAN P50914 homo sapiens (human). 60s ribosomal protein l14 (cag-isl 7). 12/1998 [MASS=23158]/Ribosomal protein L14, a putative component of the large 60S ribosomal subunit; transcripts can contain either fixed or variable numbers of CAG triplet repeats depending on cell type                                                                                                                                                                                            |
| SW:RL17_HUMAN | RPL17   | 35            | 4  | 1.63 | 0.06 | SW:RL17_HUMAN P18621 homo sapiens (human). 60s ribosomal protein l17 (l23). 5/2000 [MASS=21397]/Ribosomal protein L17, an RNA-binding structural component of the large 60S ribosomal subunit that plays a role in protein biosynthesis                                                                                                                                                                                                                                                  |
| SW:CISY_HUMAN | CS      | 5, 18         | 1  | 1.62 | 0.00 | SW:CISY_HUMAN O75390 homo sapiens (human). citrate synthase, mitochondrial precursor (ec 4.1.3.7). 7/1999 [MASS=51706]/Citrate synthase, converts acetyl-CoA and oxaloacetate into citrate plus CoA in the tricarboxylic acid cycle                                                                                                                                                                                                                                                      |
| SW:DHA4_HUMAN | ALDH3A2 | 16, 19        | 2  | 1.62 | 0.67 | SW:DHA4_HUMAN P51648 homo sapiens (human). fatty aldehyde dehydrogenase (ec 1.2.1.3) (aldehyde dehydrogenase, microsomal) (aldh class 3). 7/1999 [MASS=54848]/Aldehyde dehydrogenase 3 family member A2, catalyzes the oxidation of long chain fatty aldehydes and leukotrienes; mutation of the corresponding gene causes Sjogren Larsson syndrome, a disorder marked by mental retardation, spasticity, and ichthyosis                                                                 |
| SW:HE47_HUMAN | BAT1    | 45            | 3  | 1.62 | 0.23 | SW:HE47_HUMAN Q13838 homo sapiens (human). probable atp-dependent rna helicase p47. 11/1997 [MASS=48991]/HLA-B associated transcript 1, a putative DEAD/H box ATP-dependent RNA helicase, involved in immune response and may negatively regulate inflammation by repressing cytokine production; corresponding gene lies within the major histocompatibility complex                                                                                                                    |
| SW:RL12_HUMAN | RPL12   | 35            | 35 | 1.62 | 0.58 | SW:RL12_HUMAN P30050 homo sapiens (human). 60s ribosomal protein l12. 7/1998 [MASS=17819]/Ribosomal protein L12, a likely RNA-binding structural component of the large 60S ribosomal subunit that plays a role in protein biosynthesis; autoantibodies to ribosomal protein L12 are associated with systemic lupus erythematosus                                                                                                                                                        |
| SW:CATB_HUMAN | CTSB    | 32            | 5  | 1.62 | 0.25 | SW:CATB_HUMAN P07858 homo sapiens (human). cathepsin b precursor (ec 3.4.22.1) (cathepsin b1) (app secretase). 7/1998 [MASS=37808]/Cathepsin B, a cysteine (thiol) protease that degrades cartilage matrix proteins and other proteins, also cleaves APP; commonly overexpressed in tumors, and may be proapoptotic, but also facilitates tumor invasion                                                                                                                                 |
| SW:RFA3_HUMAN | RPA3    | 7, 14, 15, 40 | 2  | 1.61 | 0.19 | SW:RFA3_HUMAN P35244 homo sapiens (human). replication protein a 14 kda subunit (rp-a) (rf-a) (replication factor-a protein 3). 11/1997 [MASS=13569]/Replication protein A 3, a subunit of replication protein A, which is a single-stranded DNA-binding protein complex with roles in DNA replication, repair, and recombination                                                                                                                                                        |

|               |                                           |            |    |      |      |                                                                                                                                                                                                                                                                                                                                                                                                                                                         |
|---------------|-------------------------------------------|------------|----|------|------|---------------------------------------------------------------------------------------------------------------------------------------------------------------------------------------------------------------------------------------------------------------------------------------------------------------------------------------------------------------------------------------------------------------------------------------------------------|
| SW:PXH_HUMAN  | PXF                                       | 19, 36     | 1  | 1.61 | 0.00 | SW:PXH_HUMAN P40855 homo sapiens (human). peroxisomal farnesylated protein (33 kda housekeeping protein). 12/1998 [MASS=32807]/Peroxisomal farnesylated protein, peroxisomal protein that binds several peroxisomal membrane proteins (PMP), involved in early stages of PMP import and peroxisomal biogenesis; deficiency is associated with Zellweger syndrome complementation group J                                                                |
| PIR2:T46250   | sialic acid-specific acetyltransferase II | 45         | 1  | 1.60 | 0.00 | PIR2:T46250 hypothetical protein DKFZp761A051.1 - human (fragment) [MASS=58084]                                                                                                                                                                                                                                                                                                                                                                         |
| GP:AF188611_1 | HSPA5                                     | 33         | 1  | 1.60 | 0.00 | GP:AF188611_1 Homo sapiens BiP protein (HSPA5) mRNA, partial cds; glucose-regulated protein (grp78). [MASS=70931]/Heat shock 70kD protein 5, chaperone and putative ATPase involved in protein folding in the endoplasmic reticulum, induced in the stress response; autoimmunity may be a factor in rheumatoid arthritis                                                                                                                               |
| GP:D89729_1   | XPO1                                      | 24         | 1  | 1.60 | 0.00 | GP:D89729_1 Homo sapiens mRNA for CRM1 protein, complete cds. [MASS=123386]/Exportin 1, a cell cycle-regulated nuclear export receptor, mediates NES containing protein export from the nucleus, also involved in nuclear export of HIV1 RNA, may be required for autophagy                                                                                                                                                                             |
| SW:DLDH_HUMAN | DLD                                       | 5, 18      | 10 | 1.59 | 0.59 | SW:DLDH_HUMAN P09622 homo sapiens (human). dihydroliipoamide dehydrogenase, mitochondrial precursor (ec 1.8.1.4). 5/2000 [MASS=54150]/Dihydroliipoamide dehydrogenase, E3 component of pyruvate dehydrogenase complex, also component of alpha-ketoglutarate dehydrogenase and branched-chain alpha-ketoacid dehydrogenase complexes and the glycine cleavage system                                                                                    |
| SW:AOFB_HUMAN | MAOB                                      | 2, 26      | 1  | 1.59 | 0.00 | SW:AOFB_HUMAN P27338 homo sapiens (human). amine oxidase [flavin-containing] b (ec 1.4.3.4) (monoamine oxidase) (mao-b). 12/1998 [MASS=58763]/Monoamine oxidase B, an oxidase involved in the metabolism of various biologically important amines such as dopamine, requires covalently bound FAD as a cofactor, may play a role in aging and behavior                                                                                                  |
| SW:C166_HUMAN | ALCAM                                     | 6, 41      | 8  | 1.58 | 0.27 | SW:C166_HUMAN Q13740 homo sapiens (human). cd166 antigen precursor (activated leukocyte-cell adhesion molecule) (alcam). 7/1999 [MASS=65132]/Activated leukocyte cell adhesion molecule, an immunoglobulin superfamily member and ligand for CD6, involved in hematopoietic cell adhesion, may play a role in osteogenesis, marker for tumor progression in malignant melanoma                                                                          |
| SW:EP1_HUMAN  | NPC2                                      | 45         | 11 | 1.58 | 0.16 | SW:EP1_HUMAN Q15668 homo sapiens (human), pan troglodytes (chimpanzee), and macaca fascicularis (crab eating macaque) (cynomolgus monkey). epididymal secretory protein e1 precursor (epi-1) (he1) (epidid [MASS=16570]/Neimann-Pick disease type C2 (epididymal secretory protein 1), putative lysosomal protein that may play a role in cholesterol transport; mutations of the corresponding gene cause Niemann-Pick type C2 disease                 |
| SW:PPT_HUMAN  | PPT1                                      | 32, 34     | 7  | 1.57 | 0.39 | SW:PPT_HUMAN P50897 homo sapiens (human). palmitoyl-protein thioesterase precursor (ec 3.1.2.22) (palmitoyl- protein hydrolase). 5/2000 [MASS=34193]/Palmitoyl-protein thioesterase (ceroid-lipofuscinosis, neuronal 1, infantile), catalyzes the hydrolysis of palmitate from S-acetylated cysteine residues, may be involved in apoptosis; gene mutation is detected in infantile neuronal ceroid lipofuscinosis                                      |
| SW:PKBS_HUMAN | BZRP                                      | 19, 36     | 2  | 1.57 | 0.04 | SW:PKBS_HUMAN P30536 homo sapiens (human). peripheral-type benzodiazepine receptor (pbr) (pkbs) (mitochondrial benzodiazepine receptor). 6/1994 [MASS=18779]/Benzodiazepine receptor (peripheral), involved in steroid biosynthesis, cell proliferation, and may contribute to mitochondrial biogenesis and inhibit oxygen radical induced apoptosis; expression, nuclear location may correlate to breast tumor progression                            |
| SW:APE1_HUMAN | APEX                                      | 14, 18, 29 | 13 | 1.57 | 0.38 | SW:APE1_HUMAN P27695 homo sapiens (human). dna-(apurinic or apyrimidinic site) lyase (ec 4.2.99.18) (ap endonuclease 1) (apex nuclease) (apen) (ref-1 protein). 12/1998 [MASS=35423]/Apurinic/apyrimidinic endonuclease 1, multifunctional DNA repair enzyme that coordinates the repair of abasic sites and repair synthesis, acts as a transcription regulator; mutations may correlate with inclusion body myositis and colorectal tumorigenesis     |
| SW:PCP_HUMAN  | PRCP                                      | 45         | 1  | 1.57 | 0.00 | SW:PCP_HUMAN P42785 homo sapiens (human). lysosomal pro-x carboxypeptidase precursor (ec 3.4.16.2) (prolylcarboxypeptidase) (prcp) (proline carboxypeptidase) (angiotensinase c) (lysosomal carboxypeptidase) [MASS=55800]/Prolylcarboxypeptidase (angiotensinase C), a serine carboxypeptidase that catalyzes the cleavage of C-terminal amino acid residues linked to proline; corresponding gene may be a candidate locus for essential hypertension |
| SW:PSS1_HUMAN | PAPSS1                                    | 25, 34     | 1  | 1.56 | 0.00 | SW:PSS1_HUMAN P48651 homo sapiens (human). phosphatidylserine synthase i (serine-exchange enzyme i) (ec 2.7.8.-) (kiaa0024). 11/1997 [MASS=55528]/3'-phosphoadenosine 5'-phosphosulfate synthase 1, bifunctional polypeptide with ATP sulfurylase and adenosine 5'-phosphosulfate kinase activities, required for the synthesis of the sulfonate donor 3'-phosphoadenosine 5'-phosphosulfate                                                            |
| SW:GBI1_HUMAN | GNAI1                                     | 41         | 4  | 1.56 | 0.16 | SW:GBI1_HUMAN P04898 homo sapiens (human), and bos taurus (bovine). guanine nucleotide-binding protein g(i), alpha-1 subunit (adenylate cyclase-inhibiting g alpha protein). 7/1999 [MASS=40230]/Guanine nucleotide binding protein alpha inhibiting activity polypeptide 1 (Gi alpha 1), pertussis toxin-sensitive heterotrimeric G protein subunit downregulated at the membrane by increased cholesterol, mediates adenylyl cyclase inhibition       |
| SW:FXR2_HUMAN | FXR2                                      | 24         | 3  | 1.56 | 0.30 | SW:FXR2_HUMAN P51116 homo sapiens (human). fragile x mental retardation syndrome related protein 2. 10/1996 [MASS=74128]/Fragile X mental retardation gene autosomal homolog 2, binds mRNA, forms homomers or heteromers with FMR1 and FXR1, associates with the 60S ribosomal subunit and with actively translating polyribosomes, shuttles between the cytoplasm and nucleolus                                                                        |
| SW:SMD3_HUMAN | SNRPD3                                    | 25, 37, 38 | 1  | 1.55 | 0.00 | SW:SMD3_HUMAN P43331 homo sapiens (human). small nuclear ribonucleoprotein sm d3 (snrnp core protein d3) (sm-d3). 10/1996 [MASS=13916]/Small nuclear ribonucleoprotein D3, part of a multimeric complex involved in biogenesis of snRNPs and mRNA splicing, interacts with the spinal muscular atrophy disease protein (SMN); autoantigen for antibodies associated with systemic lupus erythematosus                                                   |

|                |               |           |    |      |      |                                                                                                                                                                                                                                                                                                                                                                                                                                                                                                      |
|----------------|---------------|-----------|----|------|------|------------------------------------------------------------------------------------------------------------------------------------------------------------------------------------------------------------------------------------------------------------------------------------------------------------------------------------------------------------------------------------------------------------------------------------------------------------------------------------------------------|
| SW:MIC2_HUMAN  | MIC2          | 6         | 11 | 1.55 | 0.30 | SW:MIC2_HUMAN P14209 homo sapiens (human). t-cell surface glycoprotein e2 precursor (e2 antigen) (cd99) (mic2 protein) (12e7). 5/2000 [MASS=18848]/T-cell surface glycoprotein E2, a cell surface glycoprotein involved in T cell adhesion and apoptosis, activates MAP kinases, may be involved in Golgi-membrane transport, downregulated in EBV-associated Hodgkins disease                                                                                                                       |
| GP:U52111_2    | RPL18A        | 45        | 27 | 1.54 | 0.43 | GP:U52111_2 Homo sapiens X28 region near ALD locus containing dual specificity phosphatase 9 (DUSP9), ribosomal protein L18a (RPL18a), Ca2+/Calmodulin-dependent protein kinase I (CAMKI), creatine transporter (CRTR), CDM protein (CDM), adrenoleukodystrophy protei [MASS=20867]/ribosomal protein L18a/Ribosomal protein L18a, a component of the 60S ribosomal subunit that is likely to play a role in protein synthesis; murine Rpl18a may play a role in squamous cell carcinoma progression |
| SW:MAP4_HUMAN  | MAP4          | 11        | 1  | 1.54 | 0.00 | SW:MAP4_HUMAN P27816 homo sapiens (human). microtubule-associated protein 4. 6/1994 [MASS=121180]/Microtubule-associated protein 4, a microtubule-associated protein that stabilizes microtubules and may regulate microtubule dynamics during mitosis; target of a Poliovirus protease                                                                                                                                                                                                              |
| SW:CAOP_HUMAN  | ACOX1 or ACOX | 18, 19    | 1  | 1.53 | 0.00 | SW:CAOP_HUMAN Q15067 homo sapiens (human). acyl-coenzyme a oxidase, peroxisomal (ec 1.3.3.6) (palmitoyl-coa oxidase) (aox). 11/1997 [MASS=74502]/Peroxisomal acyl-coenzyme A oxidase, catalyzes the first step in very long chain fatty acid beta-oxidation, desaturates acyl-CoA to 2-trans-enoyl-CoA and produces hydrogen peroxide                                                                                                                                                                |
| SW:SMN1_HUMAN  | SMN2          | 45        | 4  | 1.53 | 0.19 | SW:SMN1_HUMAN Q16637 homo sapiens (human). survival motor neuron protein 1. 5/2000 [MASS=31849]/Survival of motor neuron 2 centromeric, involved in neuromuscular function and may be required for neurogenesis; deletion of the corresponding gene is associated with spinal muscular atrophy (SMA) and adult progressive muscular atrophy                                                                                                                                                          |
| SW:FBRL_HUMAN  | FBL           | 37        | 1  | 1.53 | 0.00 | SW:FBRL_HUMAN P22087 homo sapiens (human). fibrillarlin (34 kda nucleolar scleroderma antigen). 7/1999 [MASS=33818]/Fibrillarlin, a nucleolar RNA-binding protein that is involved in ribosomal RNA processing; recognized by antisera from patients with scleroderma autoimmune disease, systemic sclerosis, and other connective tissue diseases                                                                                                                                                   |
| SW:IF34_HUMAN  | EIF3S4        | 35        | 1  | 1.53 | 0.00 | SW:IF34_HUMAN O75821 homo sapiens (human). eukaryotic translation initiation factor 3 subunit 4 (eif-3 delta) (eif3 p44) (eif-3 rna-binding subunit) (eif3 p42). 5/2000 [MASS=35696]/Eukaryotic translation initiation factor 3 subunit 4 (delta 44kD), a component of the eIF-3 translation initiation complex which plays a role in formation of the 40S initiator complex containing methionyl-tRNA and 40S subunit, binds RNA                                                                    |
| SW:RL10_HUMAN  | RPL10         | 35        | 14 | 1.53 | 1.04 | SW:RL10_HUMAN P27635 homo sapiens (human). 60s ribosomal protein l10 (qm protein) (tumor suppressor qm) (laminin receptor homolog). 5/2000 [MASS=24446]/Ribosomal protein L10, a component of the 60S ribosomal subunit; may be involved in the maintenance of the nontumorigenic phenotype in Wilms' microcell hybrid cells                                                                                                                                                                         |
| SW:RO60_HUMAN  | SSA2          | 28        | 2  | 1.53 | 0.01 | SW:RO60_HUMAN P10155 homo sapiens (human). 60 kda ro protein (60 kda ribonucleoprotein ro) (romp) (sjogren syndrome type a antigen (ss-a)). 2/1996 [MASS=60643]/Sjogren syndrome antigen A2, RNA-binding protein that is a component of ribonucleoprotein complexes in association with small cytoplasmic Y RNAs, an autoantigen in systemic rheumatic diseases such as lupus and Sjogren syndrome                                                                                                   |
| SW:H105_HUMAN  | HSP105B       | 10        | 1  | 1.53 | 0.00 | SW:H105_HUMAN Q92598 homo sapiens (human). heat-shock protein 105 kda (heat shock 110 kda protein) (kiaa0201). 5/2000 [MASS=96865]/Heat shock protein (105 kDa), member of the high molecular weight family of heat shock proteins, expression is induced by heat shock and is increased in cancer cells                                                                                                                                                                                             |
| GP:AF013591_1  | SUDD          | 7         | 2  | 1.53 | 0.02 | GP:AF013591_1 Homo sapiens homolog of the Aspergillus nidulans sudD gene product mRNA, complete cds. [MASS=59117]/SudD (suppressor of bimD6 Aspergillus nidulans) homolog, a member of the SUDD family of proteins, has similarity to Aspergillus nidulans SUDD, which is a suppressor of the bimD6 chromosome-spindle attachment defect                                                                                                                                                             |
| SW:RS6_HUMAN   | RPS6          | 35        | 5  | 1.52 | 0.13 | SW:RS6_HUMAN P10660 homo sapiens (human), rattus norvegicus (rat), and mus musculus (mouse). 40s ribosomal protein s6 (phosphoprotein np33). 7/1998 [MASS=28681]/Ribosomal protein S6, structural component of the cytosolic small (40S) ribosomal subunit, functions in RNA binding and protein biosynthesis                                                                                                                                                                                        |
| SW:ROK_HUMAN   | HNRPK         | 25, 37    | 6  | 1.51 | 0.30 | SW:ROK_HUMAN Q07244 homo sapiens (human), and rattus norvegicus (rat). heterogeneous nuclear ribonucleoprotein k (hnmp k) (dc-stretch binding protein) (csbp) (transformation upregulated nuclear protein [MASS=50976]/Heterogeneous nuclear ribonucleoprotein K, a transcription factor which binds to poly(C) of RNA and DNA and is involved in RNA processing, gene transcription and translational controls, may induce apoptosis and play a role in viral infection                             |
| GP:AK001207_1  | PP199         | 45        | 1  | 1.51 | 0.00 | GP:AK001207_1 Homo sapiens cDNA FLJ10345 fis, clone NT2RM2000984; unnamed protein product. [MASS=38193]                                                                                                                                                                                                                                                                                                                                                                                              |
| GPN:AF307137_1 | EHD4          | 45        | 1  | 1.51 | 0.00 | no_description_avail/Esp-15 homology domain-containing 4, may be involved in type VI collagen filament formation or stabilization, contains an N-terminal nucleotide-binding site, a bipartite nuclear localization signal, and a C-terminal EH protein-binding domain                                                                                                                                                                                                                               |
| SW:RL3L_HUMAN  | RPL3L         | 35        | 11 | 1.51 | 0.24 | SW:RL3L_HUMAN Q92901 homo sapiens (human). 60s ribosomal protein l3-like. 11/1997 [MASS=46165]/Ribosomal protein L3-like, a putative RNA-binding ribosome structural protein that plays a role in protein biosynthesis                                                                                                                                                                                                                                                                               |
| SW:PTPF_HUMAN  | LAR           | 6, 34, 41 | 5  | 1.50 | 0.35 | SW:PTPF_HUMAN P10586 homo sapiens (human). lar protein precursor (leukocyte antigen related) (ec 3.1.3.48). 10/1994 [MASS=211845]/Protein tyrosine phosphatase receptor-type F (leukocyte common antigen related), regulates insulin receptor signaling and cell migration, inhibits tumor formation in nude mice                                                                                                                                                                                    |
| SW:NLTP_HUMAN  | SCP2          | 19, 42    | 2  | 1.50 | 0.06 | SW:NLTP_HUMAN P22307 homo sapiens (human). nonspecific lipid-transfer protein precursor (nsl-tp) (sterol carrier protein 2) (scp-2) (sterol carrier protein x) (scp-x) (scpx). 5/2000 [MASS=58994]/Sterol carrier protein 2, catalyzes the exchange of phospholipids between membranes, stimulates cholesterol metabolism and may regulate steroidogenesis; alternative form, SCPX, is a 3 oxoacyl CoA thiolase                                                                                      |
| SW:L130_HUMAN  | LRPPRC        | 45        | 4  | 1.50 | 0.09 | SW:L130_HUMAN P42704 homo sapiens (human). 130 kda leucine-rich protein (lrp 130) (gp130). 10/1996 [MASS=145201]/Leucine-rich PPR-motif containing, a leucine-rich protein associated with multiprotein complexes, binds mRNA and is likely involved in nuclear export of mRNA, may be involved in cytoskeletal organization                                                                                                                                                                         |

|                |          |            |    |      |      |                                                                                                                                                                                                                                                                                                                                                                                                                                                                                      |
|----------------|----------|------------|----|------|------|--------------------------------------------------------------------------------------------------------------------------------------------------------------------------------------------------------------------------------------------------------------------------------------------------------------------------------------------------------------------------------------------------------------------------------------------------------------------------------------|
| SW:RB13_HUMAN  | RAB13    | 6, 21, 43  | 1  | 1.49 | 0.00 | SW:RB13_HUMAN P51153 homo sapiens (human). ras-related protein rab-13. 12/1998 [MASS=22774]/Ras-related GTP-binding protein 13, a putative RAB small monomeric GTPase that is likely to play a role in intracellular protein trafficking and cell adhesion                                                                                                                                                                                                                           |
| GP:AK025859_1  | FLJ22206 | 45         | 1  | 1.49 | 0.00 | GP:AK025859_1 Homo sapiens cDNA: FLJ22206 fis, clone HRC01431; unnamed protein product. [MASS=49620]/Protein containing ten ankyrin (Ank) repeats, which may mediate protein-protein interactions, has moderate similarity to a region of ankyrin 3 (human ANK3, ankyrin G), which may link integral membrane proteins to the cytoskeleton                                                                                                                                           |
| SW:RL18_HUMAN  | RPL18    | 35         | 5  | 1.49 | 0.46 | SW:RL18_HUMAN Q07020 homo sapiens (human). 60s ribosomal protein l18. 5/2000 [MASS=21503]/Ribosomal protein L18, a component of the large 60S ribosomal subunit, a negative regulator of double-stranded RNA-activated protein kinase (PKR) which is involved in control of protein synthesis initiation; gene expression increases in colon cancer                                                                                                                                  |
| PIR2:T17219    | SDFR1    | 45         | 4  | 1.48 | 0.37 | PIR2:T17219 hypothetical protein DKFZp566H1924.1 - human (fragment) [MASS=32002]/Stromal cell derived factor receptor 1, contains an immunoglobulin domain                                                                                                                                                                                                                                                                                                                           |
| SW:MMSA_HUMAN  | MMSDH    | 26         | 2  | 1.48 | 0.10 | SW:MMSA_HUMAN Q02252 homo sapiens (human). methylmalonate-semialdehyde dehydrogenase [acylating] (ec 1.2.1.27) (mmsdh) (fragment). 12/1998 [MASS=46606]/Methylmalonate-semialdehyde dehydrogenase (2-methyl-3-oxopropanoate:NAD+ oxidoreductase (CoA-propanoylating)), a member of the aldehyde dehydrogenase superfamily; deficiency is associated with developmental delay                                                                                                         |
| SW:G6PE_HUMAN  | GDH      | 2          | 1  | 1.48 | 0.00 | SW:G6PE_HUMAN O95479 homo sapiens (human). gdh/6pgl endoplasmic bifunctional protein precursor [includes: glucose 1-dehydrogenase (ec 1.1.1.47) (hexose-6-phosphate dehydrogenase); 6-phosphogluconolactate [MASS=88879]/Glutamate dehydrogenase, catalyzes the reversible deamination of L-glutamate into alpha-ketoglutarate, mitochondrial enzyme with role in neurotransmission; deficiency is associated with neurodegenerative disorders                                       |
| SW:VAB2_HUMAN  | ATP6B2   | 9, 16, 42  | 7  | 1.47 | 0.34 | SW:VAB2_HUMAN P21281 homo sapiens (human). vacuolar atp synthase subunit b, brain isoform (ec 3.6.1.34) (endomembrane proton pump 58 kda subunit) (v-atpase b subunit) (ho57). 7/1999 [MASS=56517]/Vacuolar-type H(+)-ATPase (beta isoform 2), 56 kDa subunit of the ATPase catalytic domain which may assist in transepithelial H+ transport in the kidney, may effect vacuolar acidification, and may play a role in the polarization of osteoclasts                               |
| SWN:CNE3_HUMAN | CPN3     | 19, 43     | 28 | 1.47 | 0.27 | SWN:CNE3_HUMAN O75131 homo sapiens (human). copine iii. 8/2001 [MASS=60131]/Copine III, a member of the copine family of phospholipid binding proteins, contains C2 and integrin A domains, may play a role in membrane trafficking, displays protein kinase activity, however, it does not contain a traditional kinase catalytic domain                                                                                                                                            |
| GP:AB018313_1  | VPS39    | 45         | 1  | 1.47 | 0.00 | GP:AB018313_1 Homo sapiens mRNA for KIAA0770 protein, partial cds. [MASS=83943]/Vam6-Vps39-like, contains a citron homology (CNH) domain and a clathrin heavy chain repeat domain, forms homooligomers and may act as a tethering or docking factor that promotes lysosome clustering and fusion                                                                                                                                                                                     |
| GP:D87453_1    | MRPS27   | 45         | 2  | 1.47 | 0.17 | GP:D87453_1 Human mRNA for KIAA0264 gene, partial cds. [MASS=47798]/Protein of unknown function                                                                                                                                                                                                                                                                                                                                                                                      |
| GP:U16406_1    | HIV      | 45         | 1  | 1.47 | 0.00 | GP:U16406_1 Human immunodeficiency virus type 1 patient 101, clone D, envelope glycoprotein (env) gene, V3 region, partial cds. [MASS=10815]                                                                                                                                                                                                                                                                                                                                         |
| SWN:Z272_HUMAN | ZNF272   | 45         | 1  | 1.47 | 0.00 | SWN:Z272_HUMAN Q14592 homo sapiens (human). zinc finger protein 272 (zinc finger protein hzf8) (fragment). 8/2001 [MASS=19678]/Zinc finger protein 272, a protein that contains tandem zinc fingers, may be involved in hemopoiesis                                                                                                                                                                                                                                                  |
| SW:PYR1_HUMAN  | CAD      | 25         | 6  | 1.47 | 0.46 | SW:PYR1_HUMAN P27708 homo sapiens (human). cad protein [includes: glutamine-dependent carbamoyl-phosphate synthase (ec 6.3.5.5); aspartate carbamoyltransferase (ec 2.1.3.2); dihydroorotase (ec 3.5.2.3)] [MASS=242917]/Carbamoylphosphate synthetase 2-aspartate transcarbamylase-dihydroorotase, a trifunctional enzyme that catalyzes the first three steps of pyrimidine biosynthesis                                                                                           |
| SW:MAPB_HUMAN  | MAP1B    | 11         | 4  | 1.47 | 0.30 | SW:MAPB_HUMAN P46821 homo sapiens (human). microtubule-associated protein 1b [contains: map1 light chain lc1]. 7/1999 [MASS=270620]/MAP1B                                                                                                                                                                                                                                                                                                                                            |
| SW:TPMN_HUMAN  | TPM4     | 11         | 6  | 1.47 | 0.30 | SW:TPMN_HUMAN P12324 homo sapiens (human). tropomyosin, cytoskeletal type (tm30-nm). 7/1999 [MASS=29033]/Tropomyosin 4, a member of a family of actin filament binding proteins involved in a variety of cytoskeletal-related functions; fusion of the gene with ALK has been seen in inflammatory myofibroblastic tumors                                                                                                                                                            |
| SW:CAS_HUMAN   | CSE1L    | 24, 36     | 3  | 1.46 | 0.18 | SW:CAS_HUMAN P55060 homo sapiens (human). cellular apoptosis susceptibility protein. 11/1997 [MASS=110314]/CSE1 chromosome segregation 1-like (yeast), importin-alpha nuclear export receptor, functions in toxin and TNF resistance and apoptosis, may regulate cell proliferation; corresponding gene is amplified in breast and colon carcinoma cell lines                                                                                                                        |
| SW:OBRG_HUMAN  | LEPR     | 18, 41     | 1  | 1.46 | 0.00 | SW:OBRG_HUMAN O15243 homo sapiens (human). leptin receptor gene-related protein (ob-r gene related protein) (ob-rgrp). 7/1999 [MASS=14254]/Leptin receptor, member of the gp130 (IL6ST) cytokine-receptor family, signals through the JAK/STAT cascade and functions in regulation of appetite, body fat, bone formation, and reproduction; mutations in the gene cause obesity and pituitary dysfunction                                                                            |
| SW:KU86_HUMAN  | XRCC5    | 12, 14, 40 | 6  | 1.46 | 0.36 | SW:KU86_HUMAN P13010 h atp-dependent dna helicase ii, 80 kda subunit (lupus ku autoantigen protein p86) (ku86) (ku80) (86 kda subunit of ku antigen) (thyroid-lupus autoantigen) (flaa) (ctc box binding [MASS=82573]/X-ray repair complementing defective repair in Chinese hamster cells 5, binds ds-DNA free ends, binds Ku70 (G22P1) to regulate DNA-PK, involved in DNA repair, V(D)J recombination, cell adhesion, and enzyme activation, may play a role in tumor progression |
| SW:ATNB_HUMAN  | ATP1B1   | 42         | 23 | 1.46 | 0.36 | SW:ATNB_HUMAN P05026 homo sapiens (human). sodium/potassium-transporting atpase beta-1 chain (sodium/potassium-dependent atpase beta-1 subunit). 7/1999 [MASS=35061]/Beta 1 subunit of Na+K+-ATPase, a putative sodium:potassium-exchanging ATPase                                                                                                                                                                                                                                   |

|               |                      |                |    |      |      |                                                                                                                                                                                                                                                                                                                                                                                                                                                                                                                             |
|---------------|----------------------|----------------|----|------|------|-----------------------------------------------------------------------------------------------------------------------------------------------------------------------------------------------------------------------------------------------------------------------------------------------------------------------------------------------------------------------------------------------------------------------------------------------------------------------------------------------------------------------------|
| SW:ACPM_HUMAN | NDUFAB1              | 18             | 3  | 1.46 | 0.23 | SW:ACPM_HUMAN O14561 homo sapiens (human). acyl carrier protein, mitochondrial precursor (acp) (nadh-ubiquinone oxidoreductase 9.6 kda subunit) (ec 1.6.5.3) (ec 1.6.99.3) (ci-sdap). 5/2000 [MASS=14806]/NADH-ubiquinone oxidoreductase subunit of alpha-beta subcomplex 1 (8 kD), a probable acyl carrier component of the multiprotein complex that transports electrons from NADH to ubiquinone, present within the hydrophobic fraction of complex I                                                                   |
| GP:AF037448_1 | NSAP1                | 24, 25, 37, 38 | 4  | 1.45 | 0.22 | GP:AF037448_1 Homo sapiens RRM RNA binding protein Gry-rbp (GRY-RBP) mRNA, complete cds; RRM RNA binding protein; Glycine, arginine and tyrosine-rich at C-terminus. [MASS=69633]/NS1 associated protein 1, component of the ApoB mRNA editosome involved in apolipoprotein B (APOB) mRNA editing, may bind RNA, may play a role in the regulation of mRNA splicing or transport from the nucleus                                                                                                                           |
| GP:AF149418_1 | SLC4A4               | 42             | 1  | 1.45 | 0.00 | GP:AF149418_1 Cryptolagus cuniculus duodenal sodium bicarbonate cotransport protein NBC1 mRNA, complete cds; transmembrane protein; belongs to the functional superfamily of HCO3- transporters; similar to human and mouse pancreatic NBC1 proteins. [MASS=121427]/Solute carrier family 4 (sodium bicarbonate cotransporter) member 4, acts in cellular pH regulation and maintenance of cornea and lens transparency and intraocular pressure; mutations cause proximal renal tubular acidosis with ocular abnormalities |
| SW:TXTP_HUMAN | SLC25A1              | 42             | 2  | 1.45 | 0.00 | SW:TXTP_HUMAN P53007 homo sapiens (human). tricarboxylate transport protein precursor (citrate transport protein) (ctp) (tricarboxylate carrier protein). 5/2000 [MASS=34085]/Solute carrier family 25 (mitochondrial carrier citrate transporter) member 1, a putative mitochondrial membrane citrate transporter; gene is localized to a region deleted in DiGeorge/velocardiofacial syndromes                                                                                                                            |
| SW:PRTP_HUMAN | PPGB                 | 32             | 2  | 1.45 | 0.04 | SW:PRTP_HUMAN P10619 homo sapiens (human). lysosomal protective protein precursor (ec 3.4.16.5) (cathepsin a) (carboxypeptidase c). 12/1998 [MASS=54496]/Protective protein for beta-galactosidase (cathepsin A), has serine carboxypeptidase activity, forms a complex with beta galactosidase (GLB1) and neuraminidase (NEU1), facilitates NEU1 transport and activation; genetic mutation leads to galactosialidosis                                                                                                     |
| SW:KCRU_HUMAN | CKMT1                | 18             | 6  | 1.45 | 0.16 | SW:KCRU_HUMAN P12532 homo sapiens (human). creatine kinase, ubiquitous mitochondrial precursor (ec 2.7.3.2) (u-mtck) (mia-ck) (acidic-type mitochondrial creatine kinase). 7/1999 [MASS=47037]/Mitochondrial creatine kinase 1 (ubiquitous), mitochondrial isoform that has a probable role in the phosphocreatine shuttle, plays a role in energy pathways; inactivation is involved in anthracycline cardiotoxicity                                                                                                       |
| SW:GST1_HUMAN | MGST1                | 10             | 13 | 1.45 | 0.34 | SW:GST1_HUMAN P10620 homo sapiens (human). microsomal glutathione s-transferase 1 (ec 2.5.1.18) (microsomal gst- 1). 5/2000 [MASS=17599]/Microsomal glutathione S-transferase 1, may play a role in protection against oxidative stress                                                                                                                                                                                                                                                                                     |
| SW:RSP4_HUMAN | LAMR1                | 6, 35, 41      | 7  | 1.44 | 0.05 | SW:RSP4_HUMAN P08865 homo sapiens (human). 40s ribosomal protein sa (p40) (34/67 kda laminin receptor) (colon carcinoma laminin-binding protein) (nem/1chd4). 5/2000 [MASS=32854]/Laminin receptor 1, a ribosomal protein of the small 40S ribosomal subunit, plays a role in cancer cell and basement membrane glycoprotein laminin interactions during tumor invasion and metastasis, expression correlates with cancer cell aggressiveness                                                                               |
| GP:U85625_1   | RNASE6PL             | 25, 39         | 3  | 1.44 | 0.04 | GP:U85625_1 Homo sapiens ribonuclease 6 precursor, mRNA, complete cds. [MASS=29481]/Ribonuclease 6 precursor, a putative ribonuclease that plays a role in the negative regulation of proliferation, may be involved in senescence, may be a class II tumor suppressor, downregulated in ovarian cancer and in ovarian cancer cell lines                                                                                                                                                                                    |
| GP:AB033078_1 | SGPL1                | 19, 41         | 2  | 1.44 | 0.06 | GP:AB033078_1 Homo sapiens mRNA for KIAA1252 protein, partial cds; Start codon is not identified.. [MASS=64962]/Protein with strong similarity to sphingosine phosphate lyase 1 (mouse Sgpl1), which is a member of the carbon-carbon lyase subclass of aldehyde-lyases that catalyzes cleavage of sphingosine phosphate and is involved in proliferative signal transduction                                                                                                                                               |
| GP:AL096857_1 | hypothetical protein | 45             | 2  | 1.44 | 0.15 | GP:AL096857_1 Novel human mRNA from chromosome 1, which has similarities to BAT2 genes. [MASS=295830]                                                                                                                                                                                                                                                                                                                                                                                                                       |
| SW:GBLP_HUMAN | GNB2L1               | 41             | 13 | 1.44 | 0.51 | SW:GBLP_HUMAN P25388 homo sapiens (human), mus musculus (mouse), rattus norvegicus (rat), sus scrofa (pig), and gallus gallus guanine nucleotide-binding protein beta subunit-like protein 12.3 (p205) (re [MASS=35077]/Guanine nucleotide binding protein beta 2 related sequence 1, protein kinase C (PKC) anchoring system subunit, homologous to G protein beta subunits, deficit is associated with impaired activation of PKC in the aging brain, contributing to Alzheimers                                          |
| SW:IF39_HUMAN | EIF3S9               | 35             | 5  | 1.44 | 0.20 | SW:IF39_HUMAN P55884 homo sapiens (human). eukaryotic translation initiation factor 3 subunit 9 (eif-3 eta) (eif3 p116) (eif3 p110). 5/2000 [MASS=92492]/Eukaryotic translation initiation factor 3 subunit (EIF3 subunit eta), the 116 kDa subunit of the EIF3 complex that plays a role in protein synthesis initiation                                                                                                                                                                                                   |
| SW:RL2A_HUMAN | RPL27A               | 35             | 7  | 1.44 | 0.56 | SW:RL2A_HUMAN P46776 homo sapiens (human). 60s ribosomal protein l27a. 5/2000 [MASS=16430]/Ribosomal protein L27a, component of the large 60S ribosomal subunit; gene is abnormally expressed in colorectal carcinomas                                                                                                                                                                                                                                                                                                      |
| SW:AAC1_HUMAN | ACTN1                | 11             | 12 | 1.44 | 1.22 | SW:AAC1_HUMAN P12814 homo sapiens (human). alpha-actinin 1, cytoskeletal isoform (f-actin cross linking protein). 11/1997 [MASS=102974]/Alpha-actinin isoform 1, a non-muscle cell actin-binding protein that interacts with collagen (human COL17A1) and functions in actin filament stabilization, may play a role in cell shape control                                                                                                                                                                                  |
| PIR2:T02673   | HNRPR                | 25, 37         | 3  | 1.43 | 0.18 | no_description_avail//Heterogeneous nuclear ribonucleoprotein R, a putative pre-mRNA processing protein that contains three RNA recognition domains and an RGG domain, interacts with survival motor neuron protein and is an autoantigen in autoimmune disease                                                                                                                                                                                                                                                             |
| SW:CTOG_HUMAN | KIAA0097             | 20, 23         | 4  | 1.43 | 0.10 | SW:CTOG_HUMAN Q14008 homo sapiens (human). ch-tog protein (colonic and hepatic tumor over-expressed protein) (kiaa0097). 5/2000 [MASS=225509]/Microtubule-associated protein that promotes rapid plus end microtubule assembly necessary for mitotic spindle assembly                                                                                                                                                                                                                                                       |



|                |          |                    |    |      |      |                                                                                                                                                                                                                                                                                                                                                                                                                            |
|----------------|----------|--------------------|----|------|------|----------------------------------------------------------------------------------------------------------------------------------------------------------------------------------------------------------------------------------------------------------------------------------------------------------------------------------------------------------------------------------------------------------------------------|
| SW:PPOL_HUMAN  | ADPRT    | 10, 12, 14, 29, 34 | 2  | 1.43 | 0.42 | SW:PPOL_HUMAN P09874 homo sapiens (human). poly [adp-ribose] polymerase (ec 2.4.2.30) (parp) (adprt) (nad(+) adp-ribosyltransferase) (poly[adp-ribose] synthetase). 11/1997 [MASS=112953]/ADP-ribosyltransferase, catalyzes formation of ADP-ribose polymers attached to proteins using NAD(+) as substrate in response to DNA damage, modulates chromatin structure and plays a role in DNA repair and apoptosis          |
| GP:AF157325_1  | EPLIN    | 45                 | 5  | 1.43 | 0.39 | GP:AF157325_1 Homo sapiens sterol regulatory element binding protein 3 (SREBP3) mRNA, complete cds. [MASS=51277]/Epithelial protein lost in neoplasm, a component of actin cytoskeleton, exists as alternative splice forms alpha and beta, and contributes to cell growth regulation; downregulation of EPLIN alpha may promote cancer progression                                                                        |
| GP:AF177377_1  | EML4     | 45                 | 1  | 1.43 | 0.00 | GP:AF177377_1 Homo sapiens cytoplasmic protein mRNA, complete cds; 120kDa; strongly overexpressed during mitosis. [MASS=108903]/Restrictedly overexpressed proliferation-associated protein, a cytoplasmic protein containing WD repeats and a serine protease motif, highly expressed only during mitosis                                                                                                                 |
| GP:AK022722_1  | FLJ12660 | 45                 | 1  | 1.43 | 0.00 | GP:AK022722_1 Homo sapiens cDNA FLJ12660 fis, clone NT2RM4002174, moderately similar to MRP PROTEIN; unnamed protein product. [MASS=31130]/Protein of unknown function, has high similarity to uncharacterized C. albicans Orf6.5982p                                                                                                                                                                                      |
| PIR2:I38026    | TRAF4    | 41                 | 2  | 1.43 | 0.18 | PIR2:I38026 MLN 62 protein - human [MASS=53444]/TNF receptor-associated factor 4, a member of a family of proteins that interact with the cytoplasmic domain of TNF receptors, plays a role in apoptosis, may function in TNF-related signal transduction associated with breast cancer                                                                                                                                    |
| SW:AOPP_HUMAN  | PRDX5    | 10                 | 4  | 1.43 | 0.25 | SW:AOPP_HUMAN P30044 homo sapiens (human). putative peroxisomal antioxidant enzyme (liver tissue 2d-page spot 71b). 12/1998 [MASS=16864]/Peroxiredoxin 5, catalyzes the reduction of hydrogen peroxide through Cys sulfhydryl group oxidation and reduction by thioredoxin, may be involved in oxidative stress and inflammatory responses, may contribute to tendon degeneration during aging                             |
| SW:SYN_HUMAN   | NARS     | 2, 35, 37          | 4  | 1.42 | 0.19 | SW:SYN_HUMAN O43776 homo sapiens (human). asparaginyl-trna synthetase, cytoplasmic (ec 6.1.1.22) (asparagine-- trna ligase) (asnrs). 5/2000 [MASS=62943]/Asparaginyl-tRNA synthetase, a class II aminoacyl tRNA synthetase, aminoacylates its cognate tRNAs with asparagine for protein biosynthesis, acts as an autoantigen in patients with inflammatory myopathy in interstitial lung disease                           |
| SW:OCRL_HUMAN  | OCRL     | 16, 19, 41         | 2  | 1.42 | 1.00 | SW:OCRL_HUMAN Q01968 homo sapiens (human). lowe's oculocerebrorenal syndrome protein. 7/1998 [MASS=111485]/Oculocerebrorenal syndrome of Lowe, phosphatidylinositol-4,5-bisphosphate 5-phosphatase, may play a role in intracellular protein trafficking; mutation of the corresponding gene causes Lowe oculocerebrorenal syndrome                                                                                        |
| GP:U52426_1    | STIM1    | 45                 | 5  | 1.42 | 0.34 | GP:U52426_1 Homo sapiens GOK (STIM1) mRNA, complete cds. [MASS=77492]/Stromal interaction molecule 1, a protein involved in both positive and negative control of cell proliferation; loss of expression is associated with rhabdomyosarcoma and may be involved in Beckwith Wiedemann syndrome                                                                                                                            |
| SW:MCP_HUMAN   | MCP      | 44                 | 3  | 1.42 | 0.95 | SW:MCP_HUMAN P15529 homo sapiens (human). membrane cofactor protein precursor (cd46 antigen) (trophoblast leucocyte common antigen) (tlx). 5/2000 [MASS=42248]/Membrane cofactor protein (CD46), a cofactor for factor I-mediated cleavage of C3B and C4B, a T-cell coactivator with signal transduction properties, and a receptor for viruses and bacteria, protects host cells against complement-mediated cytotoxicity |
| GP:AF035959_1  | PPAP2C   | 19                 | 1  | 1.42 | 0.00 | GP:AF035959_1 Homo sapiens type-2 phosphatidic acid phosphatase-gamma (PAP2-g) mRNA, complete cds; phosphatidate phosphohydrolase; phospholipid phosphatase. [MASS=32574]/Phosphatidic acid phosphatase 2c, hydrolyzes phospholipids, may play a role in signal transduction                                                                                                                                               |
| GP:AF055016_1  | CLLD6    | 45                 | 2  | 1.41 | 0.64 | GP:AF055016_1 Homo sapiens clone 24774 unknown mRNA, partial cds. [MASS=23711]/Protein containing a SPRY (SP1a and RYanodine Receptor) domain, has high similarity to uncharacterized C. elegans F18H3.1                                                                                                                                                                                                                   |
| GP:S82470_1    | LENG4    | 45                 | 4  | 1.41 | 0.09 | GP:S82470_1 BB1=malignant cell expression-enhanced gene/tumor progression-enhanced gene [human, UM-UC-9 bladder carcinoma cell line, mRNA, 1897 nt]; malignant cell expression-enhanced gene/tumor progression-enhanced gene; This sequence comes from Fig. 4A. [MASS=38164]/Member of the membrane bound O-acyl transferase (MBOAT) family, which are found in acyltransferase enzymes                                    |
| GPN:AF305686_1 | NJMU-R1  | 45                 | 2  | 1.41 | 0.03 | no_description_avail/Protein of unknown function                                                                                                                                                                                                                                                                                                                                                                           |
| SW:THIO_HUMAN  | TXN      | 41                 | 1  | 1.41 | 0.00 | SW:THIO_HUMAN P10599 homo sapiens (human). thioredoxin (atl-derived factor) (adf) (surface associated sulphhydryl protein) (sasp). 7/1998 [MASS=11606]/Thioredoxin, has dithiol-disulfide oxidoreductase activity and is upregulated in activated monocytes and in established dividing cell lines, promotes neutrophil migration                                                                                          |
| SW:ROM_HUMAN   | HNRPM    | 36                 | 2  | 1.41 | 0.23 | SW:ROM_HUMAN P52272 homo sapiens (human). heterogeneous nuclear ribonucleoprotein m (hnrm p). 10/1996 [MASS=77469]/Heterogeneous nuclear ribonucleoprotein M, initiates recycling of internalized immature thyroglobulin for further processing through the Golgi back to the apical membrane                                                                                                                              |
| SW:EFTU_HUMAN  | TUFM     | 35                 | 8  | 1.41 | 0.11 | SW:EFTU_HUMAN P49411 homo sapiens (human). elongation factor tu, mitochondrial precursor (p43). 12/1998 [MASS=49542]/Tu translation elongation factor (mitochondrial), a putative translation elongation factor, may be involved in protein biosynthesis, upregulated in some tumors                                                                                                                                       |
| SW:EBI2_HUMAN  | EBI2     | 41, 44             | 1  | 1.40 | 0.00 | SW:EBI2_HUMAN P32249 homo sapiens (human). ebv-induced g protein-coupled receptor 2 (ebi2). 7/1998 [MASS=41224]/Epstein-Barr virus induced gene 2, a lymphocyte specific G protein-coupled receptor that may mediate the effects of Epstein-Barr virus on B lymphocytes                                                                                                                                                    |
| GP:AK000512_1  | C1orf27  | 45                 | 1  | 1.40 | 0.00 | GP:AK000512_1 Homo sapiens cDNA FLJ20505 fis, clone KAT09459; unnamed protein product. [MASS=37773]/Protein of unknown function                                                                                                                                                                                                                                                                                            |
| SW:RL30_HUMAN  | RPL30    | 45                 | 27 | 1.40 | 0.25 | SW:RL30_HUMAN P04645 homo sapiens (human), rattus norvegicus (rat), and mus musculus (mouse). 60s ribosomal protein l30. 2/1995 [MASS=12653]/Ribosomal protein L30, a putative component of the large 60S ribosomal subunit                                                                                                                                                                                                |
| SW:LONM_HUMAN  | PRSS15   | 32                 | 4  | 1.40 | 0.68 | SW:LONM_HUMAN P36776 homo sapiens (human). mitochondrial lon protease homolog precursor (ec 3.4.21.-). 11/1995 [MASS=106467]/Protease serine 15, an ATP-dependent mitochondrial peptidase that binds single-stranded DNA and may play a role in the regulation of mitochondrial DNA replication and gene expression                                                                                                        |

|                |           |            |   |      |      |                                                                                                                                                                                                                                                                                                                                                                                                                                                     |
|----------------|-----------|------------|---|------|------|-----------------------------------------------------------------------------------------------------------------------------------------------------------------------------------------------------------------------------------------------------------------------------------------------------------------------------------------------------------------------------------------------------------------------------------------------------|
| SWN:ARVC_HUMAN | ARVCF     | 6          | 4 | 1.40 | 0.33 | SWN:ARVC_HUMAN O00192 homo sapiens (human). armadillo repeat protein deleted in velo-cardio-facial syndrome. 8/2001 [MASS=104642]/Armadillo repeat gene deleted in velocardiocardial syndrome, binds cadherins and may play a role in cell adhesion at the adherens junction; hemizyosity of the corresponding gene is associated with velocardiocardial syndrome                                                                                   |
| GP:AB000095_1  | SPINT1    | 45         | 7 | 1.39 | 0.22 | no_description_avail/Serine protease inhibitor (Kunitz type 1), a Kunitz type serine protease inhibitor that may inhibit hepatocyte growth factor activator (HGFA), involved in the progression of hepatocellular carcinoma, downregulated in colorectal adenocarcinomas                                                                                                                                                                            |
| SW:SAP3_HUMAN  | GM2A      | 19         | 3 | 1.39 | 0.14 | SW:SAP3_HUMAN P17900 homo sapiens (human). ganglioside gm2 activator precursor (cerebroside sulfate activator protein) (shingolipid activator protein 3) (sap-3). 7/1999 [MASS=20822]/GM2 ganglioside activator protein, binds glycolipids and is a cofactor for GM2 ganglioside hydrolysis by beta hexosaminidase A, activates phospholipase D, and inhibits platelet activating factor; mutation of the gene causes GM2-gangliosidosis variant AB |
| SW:UTX_HUMAN   | UTX       | 17         | 1 | 1.39 | 0.00 | SW:UTX_HUMAN O15550 homo sapiens (human). ubiquitously transcribed x chromosome tetratricopeptide repeat protein (ubiquitously transcribed tpr protein on the x chromosome). 7/1999 [MASS=154232]/Protein that has very strong similarity to murine Utx, which contains tetratricopeptide repeats and is widely transcribed; corresponding gene is found on X chromosomes and escapes X-inactivation                                                |
| PIR2:T13159    | E1B-AP5   | 24, 25, 37 | 3 | 1.38 | 0.41 | PIR2:T13159 E1B-55kDa-associated protein - human [MASS=95810]/E1B-55kDa-associated protein 5, a heterogeneous nuclear ribonucleoprotein involved in nucleocytoplasmic transport of adenovirus and cellular mRNAs, binds adenovirus early 1B (E1B-55 kD) protein and may regulate viral oncogenic transformation                                                                                                                                     |
| SW:R10A_HUMAN  | RPL10A    | 16, 35     | 1 | 1.38 | 0.00 | SW:R10A_HUMAN P53025 homo sapiens (human). 60s ribosomal protein l10a (csa-19). 10/1996 [MASS=24859]/Ribosomal protein L10a, a component of the large 60S ribosomal subunit; expression in the thymus is downregulated by cyclosporin-A                                                                                                                                                                                                             |
| GP:D87116_1    | MAP2K3    | 10, 34, 41 | 3 | 1.38 | 0.17 | GP:D87116_1 Human mRNA for MAP kinase kinase 3b ,complete cds; MKK3b. [MASS=39318]/Mitogen activated protein kinase kinase 3, phosphorylates MAP kinase p38, involved in stress and inflammatory responses, senescence, and apoptosis, also has roles in ischemic kidney injury, and H. influenzae infection                                                                                                                                        |
| SW:HEPS_HUMAN  | HPN       | 45         | 2 | 1.38 | 0.65 | SW:HEPS_HUMAN P05981 homo sapiens (human). serine protease hepsin (ec 3.4.21.-) (transmembrane protease, serine 1). 11/1997 [MASS=45011]/Hepsin, a transmembrane serine protease implicated in cell growth control and initiation of blood coagulation; overexpressed in prostate and ovarian tumors                                                                                                                                                |
| SW:R27A_HUMAN  | RPS27A    | 35         | 3 | 1.38 | 0.38 | SW:R27A_HUMAN P14798 homo sapiens (human), and cavia porcellus (guinea pig). 40s ribosomal protein s27a. 5/2000 [MASS=9418]/Ribosomal protein S27a, component of the small ribosomal subunit, consists of ubiquitin at the N-terminus and ribosomal protein S27a at the C-terminus; overexpressed in colon and renal cancers                                                                                                                        |
| SW:ROF_HUMAN   | HNRPF     | 25, 37     | 3 | 1.37 | 0.10 | SW:ROF_HUMAN P52597 homo sapiens (human). heterogeneous nuclear ribonucleoprotein f (hnrfp f). 11/1997 [MASS=45672]/Heterogeneous nuclear ribonucleoprotein F, an RNA binding protein which contains quasi-RRMs (RNA recognition motifs) and plays a role in pre-mRNA splicing                                                                                                                                                                      |
| GP:AC007055_5  | unknown   | 45         | 1 | 1.37 | 0.00 | GP:AC007055_5 Homo sapiens chromosome 14 clone BAC 201F1 map 14q24.3, complete sequence; unknown; This gene is predicted by Genscan and supported by ESTs AA836348 and AI077817. The closes. [MASS=35283]                                                                                                                                                                                                                                           |
| GP:AF030291_1  | MCG4      | 45         | 3 | 1.37 | 0.38 | no_description_avail/Zinc-finger protein-like 1, a putative transcription regulator with zinc-finger-like domains and leucine-zipper-like motifs, expressed strongly (and perhaps exclusively) in the exocrine (but not the endocrine) pancreas                                                                                                                                                                                                     |
| GP:AF059524_1  | RTN3      | 45         | 3 | 1.37 | 0.05 | no_description_avail/Reticulon 3, member of the reticulon (neuroendocrine-specific, NSP) family of proteins that associate with the endoplasmic reticulum, most highly expressed in brain                                                                                                                                                                                                                                                           |
| GP:AJ131186_1  | NMP200    | 45         | 1 | 1.37 | 0.00 | GP:AJ131186_1 Homo sapiens mRNA for nuclear matrix protein NMP200; related to splicing factor PRP19. [MASS=55181]/Protein containing six WD domains (WD-40 repeats), which may mediate protein-protein interactions, has weak similarity to non-snRNP spliceosome component (S. cerevisiae Prp19p), which is involved in mitotic recombination and gene conversion                                                                                  |
| PIR2:T12456    | LOC152502 | 45         | 4 | 1.37 | 0.08 | PIR2:T12456 hypothetical protein DKFZp564M2423.1 - human [MASS=42427]                                                                                                                                                                                                                                                                                                                                                                               |
| SW:RBP2_HUMAN  | RANBP2    | 45         | 3 | 1.37 | 0.58 | SW:RBP2_HUMAN P49792 homo sapiens (human). ran-binding protein 2 (nuclear pore complex protein nup358) (nucleoporin nup358) (358 kda nucleoporin) (p270). 5/2000 [MASS=358218]/RAN binding protein 2, binds RAN-GTP at the cytoplasmic face of nuclear pores, also functions as a chaperone for red and green opsin molecules                                                                                                                       |
| SW:TM21_HUMAN  | TMP21     | 43         | 3 | 1.37 | 0.60 | SW:TM21_HUMAN P49755 homo sapiens (human). transmembrane protein tmp21 precursor (s311i125) (s311i125). 12/1998 [MASS=24976]/Transmembrane protein Mr 21,000, involved in biosynthetic protein transport from the ER to Golgi, regulates Rac-GTP levels through interaction with beta 2-chimaerin (CHN2); corresponding gene is located in the AD3 region mutated in Alzheimer's Disease                                                            |
| GP:AB020880_1  | SART3     | 37         | 5 | 1.37 | 0.17 | GP:AB020880_1 Homo sapiens mRNA for squamous cell carcinoma antigen SART-3, complete cds; squamous cell carcinoma antigen recognized by T cells. [MASS=109935]/Squamous cell carcinoma antigen recognized by T-cells 3, a snRNA binding protein that functions in spliceosome reassembly, acts as a tumor antigen recognized by cytotoxic T lymphocytes, may be a target for immunotherapy in a number of cancers                                   |
| SW:IVD_HUMAN   | IVD       | 2          | 1 | 1.37 | 0.00 | SW:IVD_HUMAN P26440 homo sapiens (human). isovaleryl-coa dehydrogenase precursor (ec 1.3.99.10) (ivd). 7/1998 [MASS=46319]/Mitochondrial isovaleryl-CoA dehydrogenase, catalyzes the conversion of isovaleryl-CoA to 3-methylcrotonyl-CoA in leucine metabolism; deficiency causes isovaleric acidemia                                                                                                                                              |
| SW:KG3B_HUMAN  | GSK3B     | 5, 18, 41  | 1 | 1.36 | 0.00 | SW:KG3B_HUMAN P49841 homo sapiens (human). glycogen synthase kinase-3 beta (ec 2.7.1.37) (gsk-3 beta). 7/1999 [MASS=46768]/Glycogen synthase kinase-3 beta, a serine threonine protein kinase that phosphorylates several cytoplasmic and nuclear proteins, involved in embryonic development, and may hyperphosphorylate tau (MAPT) in                                                                                                             |

|                |          |            |    |      |      |                                                                                                                                                                                                                                                                                                                                                                                                                                                                  |
|----------------|----------|------------|----|------|------|------------------------------------------------------------------------------------------------------------------------------------------------------------------------------------------------------------------------------------------------------------------------------------------------------------------------------------------------------------------------------------------------------------------------------------------------------------------|
| SW:SERA_HUMAN  | PHGDH    | 2, 16      | 44 | 1.36 | 0.41 | SW:SERA_HUMAN O43175 homo sapiens (human). d-3-phosphoglycerate dehydrogenase (ec 1.1.1.95) (pgdh). 7/1999 [MASS=56665]/3-phosphoglycerate dehydrogenase, enzyme that catalyzes the first step of serine biosynthesis which is the oxidation of 3-phosphoglycerate to 3-phosphohydroxypyruvate; mutation of the corresponding gene causes microcephaly, retardation, and seizures                                                                                |
| SW:ECH1_HUMAN  | ECH1     | 18, 19     | 28 | 1.36 | 0.24 | SW:ECH1_HUMAN Q13011 homo sapiens (human). delta3,5-delta2,4-dienoyl-coa isomerase precursor (ec 5.3.3.-). 7/1999 [MASS=35994]/Enoyl Coenzyme A hydratase 1 (peroxisomal), putative enzyme that may play a role in peroxisomal beta-oxidation                                                                                                                                                                                                                    |
| GP:AB046774_1  | KIAA1554 | 45         | 1  | 1.36 | 0.00 | GP:AB046774_1 Homo sapiens mRNA for KIAA1554 protein, partial cds; Start codon is not identified.. [MASS=150426]/Protein containing a C3HC4 type (RING) zinc finger, which may mediate protein-protein interactions                                                                                                                                                                                                                                              |
| GP:AF239727_1  | MRPL39   | 45         | 1  | 1.36 | 0.00 | no_description_avail/Protein of unknown function, has low similarity to a region of threonyl-tRNA synthetases                                                                                                                                                                                                                                                                                                                                                    |
| GP:AJ011129_1  | LOC64148 | 45         | 2  | 1.36 | 0.16 | GP:AJ011129_1 Homo sapiens mRNA for 17kD fetal brain protein; ORF1. [MASS=17218]/Member of the SCP-like extracellular protein family, has moderate similarity to a region of S. cerevisiae Pry3p, which shows daughter-specific expression and may have a role in mating efficiency                                                                                                                                                                              |
| GP:U97519_1    | PODXL    | 45         | 1  | 1.36 | 0.00 | GP:U97519_1 Homo sapiens podocalyxin-like protein mRNA, complete cds. [MASS=55596]/Podocalyxin like, a transmembrane sialomucin that is an L selectin ligand and important for lymphocyte adhesion and homing                                                                                                                                                                                                                                                    |
| GP:AB037108_1  | TPRA40   | 19         | 2  | 1.36 | 0.09 | GP:AB037108_1 Homo sapiens mRNA for seven transmembrane domain orphan receptor, complete cds; seven transmembrane domain containing protein. [MASS=41090]/Protein with strong similarity to murine Tpra40, which is a seven transmembrane domain protein expressed in 3T3 adipocytes, and that has elevated expression in epididymal fat of genetically diabetic and obese mice                                                                                  |
| SW:GL6S_HUMAN  | GNS      | 5          | 5  | 1.36 | 0.20 | SW:GL6S_HUMAN P15586 homo sapiens (human). n-acetylglucosamine-6-sulfatase precursor (ec 3.1.6.14) (g6s) (glucosamine-6-sulfatase). 7/1998 [MASS=62082]/N-acetylglucosamine-6-sulfate sulfatase, an enzyme that hydrolyzes sulfate groups from glycosaminoglycans and is involved in the catabolism of heparan sulfate and keratan sulfate; deficiency causes Sanfilippo disease type D                                                                          |
| GP:AB002377_1  | KIAA0379 | 45         | 4  | 1.35 | 0.17 | no_description_avail/Protein containing many ankyrin (Ank) repeats, which may mediate protein-protein interactions, has low similarity to a region of ankyrin (rat Ank3), which binds Na+/K+-ATPase and links integral membrane proteins to the cytoskeleton                                                                                                                                                                                                     |
| GP:AF078860_1  | MRPL42   | 45         | 2  | 1.35 | 0.14 | GP:AF078860_1 Homo sapiens PTD007 mRNA, complete cds. [MASS=16661]/Mitochondrial ribosomal protein L42, component of the large ribosomal subunit                                                                                                                                                                                                                                                                                                                 |
| GP:AK000325_1  | FLJ20318 | 45         | 2  | 1.35 | 0.22 | GP:AK000325_1 Homo sapiens cDNA FLJ20318 fis, clone HEP08704; unnamed protein product. [MASS=62816]/Protein of unknown function                                                                                                                                                                                                                                                                                                                                  |
| PIR2:T08787    | TES      | 45         | 1  | 1.35 | 0.00 | PIR2:T08787 probable testin DKFZp586B2022.1 - human (fragment) [MASS=15593]/Protein containing three LIM domains, has a region of low similarity to a region of four and a half LIM domains 2 (human FHL2), which is a apoptosis and transcription regulator that is downregulated in rhabdomyosarcoma cell lines                                                                                                                                                |
| SW:Y041_HUMAN  | CENTB2   | 45         | 1  | 1.35 | 0.00 | SW:Y041_HUMAN Q15057 homo sapiens (human). hypothetical protein kiaa0041 (fragment). 7/1999 [MASS=71243]/Centaurin beta 2, a GTPase activating protein for ARF6, stimulated by phosphatidic acid and PIP2, and acts in the cell periphery to affect the actin cytoskeleton                                                                                                                                                                                       |
| GPN:AF191298_1 | VPS35    | 43         | 7  | 1.35 | 0.49 | Homo sapiens, vacuolar protein sorting 35/Maternal-embryonic 3, may be a component of the sorting machinery required for vesicle to Golgi retrieval                                                                                                                                                                                                                                                                                                              |
| PIR2:S33377    | CKAP4    | 43         | 5  | 1.35 | 0.22 | PIR2:S33377 P63 protein - human [MASS=65793]/Cytoskeleton-associated protein 4, type II membrane protein of the endoplasmic reticulum, binds to microtubules and links them to the endoplasmic reticulum, promotes tubulin polymerization and endoplasmic reticulum reorganization                                                                                                                                                                               |
| GP:AK001521_1  | DIP13B   | 41         | 4  | 1.35 | 0.12 | GP:AK001521_1 Homo sapiens cDNA FLJ10659 fis, clone NT2RP2006071; unnamed protein product. [MASS=36277]/Protein with unknown function, has high similarity to a region of APPL, an adaptor protein with a PH domain, a PTB domain and a leucine zipper motif, and which binds to AKT2 and PI3 kinase catalytic subunit p110alpha                                                                                                                                 |
| SW:RLA0_HUMAN  | RPLP0    | 35         | 14 | 1.35 | 0.20 | SW:RLA0_HUMAN P05388 homo sapiens (human). 60s acidic ribosomal protein p0 (I10e). 5/2000 [MASS=34274]/Ribosomal protein P0, acidic phosphoprotein component of the large 60S ribosomal subunit; shows increased expression in hepatocellular and colon carcinomas                                                                                                                                                                                               |
| GP:AB032179_1  | EHM2     | 11         | 1  | 1.35 | 0.00 | GP:AB032179_1 Homo sapiens EHM2 mRNA, complete cds; similar to mouse Ehm2. [MASS=58628]/Protein containing two FERM (Band 4.1) family domains, which link cytoplasmic proteins to membranes, has low similarity to myosin regulatory light chain interacting protein (human MIR), which may be linked to mental retardation                                                                                                                                      |
| SW:OGT1_HUMAN  | OGT      | 26, 34, 41 | 1  | 1.34 | 0.00 | SW:OGT1_HUMAN O15294 homo sapiens (human). udp-n-acetylglucosamine-peptide n-acetylglucosaminyltransferase 100 kda subunit (ec 2.4.1.-) (o-glcnac transferase p100 subunit). 5/2000 [MASS=103012]/O-linked N-acetylglucosamine transferase (UDP-N-acetylglucosamine:polypeptide-N-acetylglucosaminyltransferase), enzyme that functions in O-glycosylation, may be involved in insulin secretion and glucose homeostasis, may play a role in signal transduction |
| PIR2:T08769    | KIAA0747 | 45         | 8  | 1.34 | 0.14 | PIR2:T08769 hypothetical protein DKFZp586K011.1 - human (fragment) [MASS=81441]/Protein with strong similarity to rat Mbc2, which localizes to microsomes and plasma membranes and is expressed ubiquitously                                                                                                                                                                                                                                                     |
| GP:AJ001714_1  | myo9a    | 11         | 1  | 1.34 | 0.00 | GP:AJ001714_1 Homo sapiens mRNA for myosin-IXA. [MASS=90079]/Myosin IXA, a member of the unconventional myosin family that contains a GTPase activating protein (GAP) domain; the corresponding gene is a candidate for Bardet Biedl syndrome, characterized by mental retardation, obesity, and retinitis pigmentosa                                                                                                                                            |
| SW:HMG1_HUMAN  | HMG1     | 12, 40     | 3  | 1.33 | 0.21 | SW:HMG1_HUMAN P09429 homo sapiens (human). high mobility group protein hmg1 (hmg-1). 5/2000 [MASS=24763]/High-mobility group (nonhistone chromosomal) protein 1, induces DNA bending, binds damaged DNA, activates and represses transcription, involved in the DNA damage response and V(D)J recombination, may be a target for therapeutic intervention of sepsis                                                                                              |

|                |          |               |    |      |      |                                                                                                                                                                                                                                                                                                                                                                                                                                                                                       |
|----------------|----------|---------------|----|------|------|---------------------------------------------------------------------------------------------------------------------------------------------------------------------------------------------------------------------------------------------------------------------------------------------------------------------------------------------------------------------------------------------------------------------------------------------------------------------------------------|
| GP:U85946_1    | SEC10L1  | 43            | 5  | 1.33 | 0.11 | GP:U85946_1 Homo sapiens brain secretory protein hSec10p (HSEC10) mRNA, complete cds; similar to S. cerevisiae Sec10p. [MASS=81853]/SEC10 (S. cerevisiae)-like 1, a component of the exocyst complex, involved in the synthesis and delivery of secretory proteins in epithelial cells, involved in the development of epithelial cysts and tubules                                                                                                                                   |
| GPN:AF293383_1 | ABCF1    | 35            | 1  | 1.33 | 0.00 | ATP-binding cassette subfamily F member 1, a member of the ATP-binding cassette family that does not contain a transmembrane domain and may play a role in translation                                                                                                                                                                                                                                                                                                                |
| SW:RS11_HUMAN  | RPS11    | 35            | 8  | 1.33 | 0.07 | SW:RS11_HUMAN P04643 homo sapiens (human), rattus norvegicus (rat), and mus musculus (mouse). 40s ribosomal protein s11. 5/2000 [MASS=18431]/Ribosomal protein S11, putative component of the small 40S ribosomal subunit                                                                                                                                                                                                                                                             |
| PIR2:I59405    | TCEB2    | 29, 31, 32    | 2  | 1.32 | 0.00 | PIR2:I59405 RNA polymerase II transcription factor SIII p18 subunit - human [MASS=13133]/Transcription elongation factor B (SIII) polypeptide 2, a subunit of the elongin complex that facilitates RNA polymerase II elongation, component of a ubiquitin ligase complex that stabilizes and enhances the tumor suppressor action of the VHL protein                                                                                                                                  |
| SW:ERF1_HUMAN  | ETF1     | 35            | 1  | 1.32 | 0.00 | SW:ERF1_HUMAN P46055 homo sapiens (human), mesocricetus auratus (golden hamster), and oryctolagus cuniculus (rabbit). eukaryotic peptide chain release factor subunit 1 (erf1) (tb3-1) (c11 protein). 5/20 [MASS=49031]/ Eukaryotic translation termination factor 1, an RNA binding translation release factor involved in translation termination, expression is increased in H. pylori infected gastric cancer cells; may be candidate gene for certain malignant myeloid diseases |
| SW:RL5_HUMAN   | RPL5     | 35            | 7  | 1.32 | 0.51 | SW:RL5_HUMAN P46777 homo sapiens (human). 60s ribosomal protein l5. 7/1999 [MASS=34317]/Ribosomal protein L5, a putative component of the 60S ribosomal subunit, binds 5S rRNA, undergoes nuclear export, may play a role in rev-mediated HIV-1 RNA nucleocytoplasmic transport; expression is altered in colorectal cancer and astrocytomas                                                                                                                                          |
| SW:DDXY_HUMAN  | DBY      | 16            | 2  | 1.32 | 0.05 | SW:DDXY_HUMAN O15523 homo sapiens (human). dead box protein 3, y-chromosomal. 7/1999 [MASS=73095]/DEAD/H box polypeptide Y chromosome, a putative ATP-dependent RNA helicase, plays a role in spermatogenesis; deletion of the corresponding gene is associated with male infertility                                                                                                                                                                                                 |
| SW:SAP_HUMAN   | PSAP     | 19, 42        | 14 | 1.31 | 0.91 | SW:SAP_HUMAN P07602 h proactivator polypeptide precursor [contains: saposin a (protein a); saposin b (sphingolipid activator protein 1) (sap-1) (dispersin) (sulfatide/gm1 activator); saposin c (co-beta- [MASS=58113]/Prosaposin, precursor of saposins A, B, C, and D which transport gangliosides and activate sphingolipid hydrolysis, stimulates neurite growth and inhibits apoptosis; variants are associated with metachromatic leukodystrophy and Gaucher disease           |
| PIR2:JC5938    | Txnl     | 18, 34, 41    | 2  | 1.31 | 0.01 | PIR2:JC5938 thioredoxin-like protein - human [MASS=32251]/Thioredoxin-like 32, a thioredoxin related protein that has thioredoxin-like reducing activity                                                                                                                                                                                                                                                                                                                              |
| SW:D3D2_HUMAN  | DCI      | 18, 19        | 3  | 1.31 | 0.20 | SW:D3D2_HUMAN P42126 homo sapiens (human). 3,2-trans-enoyl-coa isomerase, mitochondrial precursor (ec 5.3.3.8) (dodecenoyl-coa delta-isomerase). 7/1999 [MASS=32816]/Dodecenoyl-Coenzyme A delta isomerase (3,2 trans-enoyl-Coenzyme A isomerase), catalyzes the isomerization of 3-cis and 3-trans enoyl CoA esters to 2-trans enoyl CoA esters, functions in mitochondrial beta-oxidation of unsaturated fatty acids                                                                |
| GP:AF161380_1  | Mrpl38   | 45            | 1  | 1.31 | 0.00 | GP:AF161380_1 Homo sapiens HSPC262 mRNA, partial cds. [MASS=20619]                                                                                                                                                                                                                                                                                                                                                                                                                    |
| SW:DDX3_HUMAN  | DDX3     | 45            | 14 | 1.31 | 0.36 | SW:DDX3_HUMAN O00571 homo sapiens (human). dead box protein 3 (helicase-like protein 2) (hlp2) (dead box, x isoform). 7/1999 [MASS=73243]/DEAD box protein 3, a member of the DEAD/H box ATP-dependent RNA helicase protein family, interacts with Hepatitis C virus core protein; corresponding gene is found on X chromosomes and escapes X-inactivation                                                                                                                            |
| GP:AF144700_1  | TIMM13A  | 36            | 5  | 1.31 | 0.20 | SW:113A_HUMAN Q9uh8 homo sapiens (human), mus musculus (mouse), and rattus norvegicus (rat), mitochondrial import inner membrane translocase subunit tim13 a. 10/2001 [MASS=10458]/Translocase of the mitochondrial inner membrane 13, a mitochondrial translocase subunit that oligomerizes with DDP1 (human TIMM8A) and mediates the translocation of the Tim23 (human TIM23) precursor across the outer mitochondrial membrane                                                     |
| SW:DHE3_HUMAN  | GLUD1    | 2             | 8  | 1.31 | 0.24 | SW:DHE3_HUMAN P00367 homo sapiens (human). glutamate dehydrogenase 1 precursor (ec 1.4.1.3) (gdh). 5/2000 [MASS=61398]/Glutamate dehydrogenase, catalyzes the reversible deamination of L-glutamate into alpha-ketoglutarate, mitochondrial enzyme with role in neurotransmission; deficiency is associated with neurodegenerative disorders                                                                                                                                          |
| SW:P2BA_HUMAN  | PPP3CA   | 7, 29, 34, 41 | 3  | 1.30 | 0.16 | SW:P2BA_HUMAN Q08209 homo sapiens (human). serine/threonine protein phosphatase 2b catalytic subunit, alpha isoform (ec 3.1.3.16) (calmodulin-dependent calcineurin a subunit, alpha isoform) (cam-prp cat [MASS=58688]/Calcineurin A alpha, catalytic subunit of calcium/calmodulin regulated protein phosphatase, regulates activity of transcription factors involved in signal transduction and growth control                                                                    |
| SW:RCC_HUMAN   | CHC1     | 7, 12, 24     | 2  | 1.30 | 0.00 | SW:RCC_HUMAN P18754 homo sapiens (human). regulator of chromosome condensation (cell cycle regulatory protein). 7/1999 [MASS=44969]/Regulator of chromosome condensation 1, a chromatin-binding protein that functions as a guanine nucleotide exchange factor for RAN, plays roles in nucleocytoplasmic transport, mitotic spindle formation, and nuclear envelope assembly                                                                                                          |
| SW:CPT1_HUMAN  | CPT1A    | 18, 19        | 1  | 1.30 | 0.00 | SW:CPT1_HUMAN P50416 homo sapiens (human). carnitine o-palmitoyltransferase i, mitochondrial liver isoform (ec 2.3.1.21) (cpt i) (cpti-l). 7/1999 [MASS=88429]/Liver carnitine palmitoyltransferase I, enzyme of long-chain fatty acid beta-oxidation pathway; mutations in the corresponding gene are associated with carnitine palmitoyltransferase I deficiency                                                                                                                    |
| GP:AB020694_1  | KIAA0887 | 45            | 2  | 1.30 | 0.00 | GP:AB020694_1 Homo sapiens mRNA for KIAA0887 protein, partial cds. [MASS=52421]/Protein containing a UBX domain, which are found in ubiquitin regulatory proteins                                                                                                                                                                                                                                                                                                                     |
| GP:U47924_19   | C3f      | 45            | 2  | 1.30 | 0.07 | GP:U47924_19 Human chromosome 12p13 sequence, complete sequence; similar to S. cerevisiae ORF YOR175c, encoded by GenBank Accession Number Z75083. [MASS=44122]/Member of the membrane bound O-acyl transferase (MBOAT) family, which are found in acyltransferase enzymes, has strong similarity to uncharacterized mouse Grcc3f                                                                                                                                                     |
| GP:AB037857_1  | PTGFRN   | 41            | 10 | 1.30 | 0.21 | GP:AB037857_1 Homo sapiens mRNA for KIAA1436 protein, partial cds; Start codon is not identified.. [MASS=102996]/Prostaglandin F2 alpha receptor regulatory protein, a putative transmembrane glycoprotein that copurifies with and negatively regulates the prostaglandin F2 alpha receptor by inhibiting ligand-binding                                                                                                                                                             |

|                |                             |            |    |      |      |                                                                                                                                                                                                                                                                                                                                                                                                                                                                                          |
|----------------|-----------------------------|------------|----|------|------|------------------------------------------------------------------------------------------------------------------------------------------------------------------------------------------------------------------------------------------------------------------------------------------------------------------------------------------------------------------------------------------------------------------------------------------------------------------------------------------|
| SW:RL23_HUMAN  | RPL23                       | 35         | 10 | 1.30 | 0.27 | SW:RL23_HUMAN P23131 homo sapiens (human), rattus norvegicus (rat), and sus scrofa (pig). 60s ribosomal protein l23 (l17). 7/1999 [MASS=14865]/Ribosomal protein L23, a putative large ribosomal subunit component that is likely to play a role in protein biosynthesis                                                                                                                                                                                                                 |
| SW:RS21_HUMAN  | RPS21                       | 35         | 3  | 1.30 | 0.29 | SW:RS21_HUMAN P35265 homo sapiens (human), and sus scrofa (pig). 40s ribosomal protein s21. 5/2000 [MASS=9111]/Ribosomal protein S21, component of the small 40S ribosomal subunit                                                                                                                                                                                                                                                                                                       |
| SWN:DUSC_HUMAN | DUSP12                      | 34         | 3  | 1.30 | 0.17 | SWN:DUSC_HUMAN Q9uni6 homo sapiens (human). dual specificity protein phosphatase 12 (ec 3.1.3.48) (ec 3.1.3.16) (dual-specificity tyrosine phosphatase yvh1). 8/2001 [MASS=37687]/Dual specificity phosphatase 12, binds zinc via a zinc-finger motif in the carboxyl terminus, may play a role in cell growth; genetic variants may be associated with cancer susceptibility                                                                                                            |
| SW:AR34_HUMAN  | ARPC2                       | 8, 11      | 2  | 1.29 | 0.38 | SW:AR34_HUMAN O15144 homo sapiens (human). arp2/3 complex 34 kda subunit (p34-arc). 7/1998 [MASS=34333]/Actin related protein 2/3 complex subunit 2, component of the Arp2/3 complex, which is involved in assembly of the actin cytoskeleton, interacts directly with ARPC4, possibly as an early intermediate in Arp2/3 complex formation                                                                                                                                              |
| PIR2:I37405    | GALNT1                      | 26, 34     | 4  | 1.29 | 0.30 | PIR2:I37405 polypeptide N-acetylgalactosaminyltransferase (EC 2.4.1.41) - human [MASS=64733]/N-acetylgalactosaminyltransferase T1, enzyme that initiates O-glycosylation; inhibition affects the sensitivity of tumors cells to immune killer cells                                                                                                                                                                                                                                      |
| SW:BCR_HUMAN   | BCR                         | 10, 34, 41 | 1  | 1.29 | 0.00 | SW:BCR_HUMAN P11274 homo sapiens (human). breakpoint cluster region protein (ec 2.7.1.-). 7/1999 [MASS=142806]/Breakpoint cluster region, GTPase-activating protein for p21rac with serine/threonine kinase activity; translocation of the corresponding gene is associated with Philadelphia chromosome-positive chronic myeloid leukemia                                                                                                                                               |
| GP:AF005888_1  | NOC4                        | 45         | 3  | 1.29 | 0.16 | GP:AF005888_1 Homo sapiens COX4L mRNA, complete cds. [MASS=23773]/Neighbor of COX4, ubiquitously expressed, contains potential binding sites for Sp1 and NRF-2/GABP                                                                                                                                                                                                                                                                                                                      |
| GP:AF116347_1  | SMBP                        | 45         | 5  | 1.29 | 0.23 | SW:T9S3_HUMAN Q9hd45 homo sapiens (human). transmembrane 9 superfamily protein member 3 precursor (sm-11044 binding protein) (ep70-p-iso). 10/2001 [MASS=67888]/SM-11044 binding protein, member of the transmembrane protein 9 superfamily, a predicted integral membrane protein which has functional ligand binding properties                                                                                                                                                        |
| GPN:AL449244_1 | Hypothetical protein PP2447 | 45         | 1  | 1.29 | 0.00 | GPN:AK017745_1 Mus musculus 8 days embryo whole body cDNA, RIKEN full-length enriched library, clone:5730502D15:homolog to human DJ402G11.4 (NOVEL PROTEIN SIMILAR TO C. ELEGANS F38A5.2 (ISOFORM 2)) (FRAGMENT), full insert sequence; data source:SPTR, source key:Q9UG [MASS=46538]                                                                                                                                                                                                   |
| GP:AF020202_1  | UNC13                       | 41         | 3  | 1.29 | 0.09 | GP:AF020202_1 Homo sapiens Munc13 mRNA, complete cds; contains C2 domains; similar to R. norvegicus Munc13-2 encoded by GenBank Accession Number U24071. [MASS=180684]/UNC13 (C. elegans)-like, a diacylglycerol receptor that may function in a PKC-independent, diacylglycerol-activated signaling pathway that induces apoptosis, may be involved in renal cell injury in hyperglycemia                                                                                               |
| SW:TCPQ_HUMAN  | CCT8                        | 33         | 3  | 1.29 | 0.06 | SW:TCPQ_HUMAN P50990 homo sapiens (human). t-complex protein 1, theta subunit (tcp-1-theta) (cct-theta) (kiaa0002). 5/2000 [MASS=59635]/Protein with very strong similarity to murine Mm.17989, which is the theta subunit of the cytosolic chaperonin containing TCP-1 that assists in the proper folding of tubulin, actin and centractin                                                                                                                                              |
| SW:SODC_HUMAN  | SOD1                        | 10         | 5  | 1.29 | 0.18 | SW:SODC_HUMAN P00441 homo sapiens (human). superoxide dismutase [cu-zn] (ec 1.15.1.1). 5/2000 [MASS=15805]/Copper zinc superoxide dismutase, an enzyme that catalyzes the dismutation of the superoxide radical to molecular oxygen and hydrogen peroxide; mutations are associated with some cases of familial amyotrophic lateral sclerosis                                                                                                                                            |
| SW:ATC2_HUMAN  | ATP2B2                      | 6, 16, 42  | 9  | 1.28 | 0.35 | SW:ATC2_HUMAN P16615 h sarcoplasmic/endoplasmic reticulum calcium atpase isoform 2 (ec 3.6.1.38) (calcium pump 2) (serca2) (sr ca(2+)-atpase 2) (calcium- transporting atpase sarcoplasmic reticulum type, [MASS=114757]/Sarcoplasmic reticulum Ca2+-ATPase 2 (slow twitch muscle, cardiac, and nonmuscle form), pumps calcium from the cytoplasm to the ER; reduced activity in the heart is implicated in dilated cardiomyopathy and gene mutations are associated with Darier disease |
| SW:UBCI_HUMAN  | UBE2I                       | 32, 34     | 2  | 1.28 | 0.02 | SW:UBCI_HUMAN P50550 homo sapiens (human), mus musculus (mouse), and xenopus laevis (african clawed frog). ubiquitin-conjugating enzyme e2-18 kda (ec 6.3.2.19) (ubiquitin-protein ligase) (ubiquitin carr [MASS=18007]/Ubiquitin-conjugating enzyme E2I, member of the ubiquitin-conjugating enzyme family that catalyzes the ubiquitination of cellular proteins and marks them for degradation, may play roles in cell cycle progression and repair of TOP1-mediated DNA damage       |
| SW:KAPA_HUMAN  | PRKACA                      | 16, 34, 41 | 2  | 1.28 | 0.55 | SW:KAPA_HUMAN P17612 homo sapiens (human). camp-dependent protein kinase, alpha-catalytic subunit (ec 2.7.1.37) (pka c-alpha). 5/2000 [MASS=40458]/Catalytic subunit C alpha of cAMP-dependent protein kinase, plays a role in transcriptional regulation and may mediate suppression of apoptosis, may also serve as a tumor biomarker; alternative form C alpha 2 may play a role in sperm development                                                                                 |
| GP:AB037855_1  | KIAA1434                    | 45         | 1  | 1.28 | 0.00 | GP:AB037855_1 Homo sapiens mRNA for KIAA1434 protein, partial cds; Start codon is not identified.. [MASS=76634]/Member of the glycerophosphoryl diester phosphodiesterase family, which are involved in lipid metabolism, contains a starch binding domain, which are found in glycosyl hydrolases, has low similarity to uncharacterized C. elegans T05H10.7                                                                                                                            |
| PIR2:T08729    | DKFZp566H073                | 45         | 2  | 1.28 | 0.00 | PIR2:T08729 RING zinc finger protein homolog DKFZp566H073.1 - human (fragment) [MASS=35718]/Protein containing a C3HC4 type (RING) zinc finger and a PA (protease associated) domain, has a region of moderate similarity to a region of RING finger protein 12 (mouse Rnf12), which is a corepressor of LIM that binds to LIM domains                                                                                                                                                   |
| SW:ACON_HUMAN  | ACO2                        | 5, 18      | 1  | 1.27 | 0.00 | SW:ACON_HUMAN Q99798 homo sapiens (human). aconitate hydratase, mitochondrial precursor (ec 4.2.1.3) (citrate hydro-lyase) (aconitase). 5/2000 [MASS=85425]/Aconitase 2 mitochondrial (aconitate hydratase), catalyzes the conversion of citrate to cis-aconitate in the tricarboxylic acid cycle, may be involved in iron homeostasis; deficiency may be associated with lifelong exercise intolerance                                                                                  |

|                |          |               |    |      |      |                                                                                                                                                                                                                                                                                                                                                                                                                                              |
|----------------|----------|---------------|----|------|------|----------------------------------------------------------------------------------------------------------------------------------------------------------------------------------------------------------------------------------------------------------------------------------------------------------------------------------------------------------------------------------------------------------------------------------------------|
| GP:AK000330_1  | FLJ20323 | 45            | 1  | 1.27 | 0.00 | GP:AK000330_1 Homo sapiens cDNA FLJ20323 fis, clone HEP09648; unnamed protein product. [MASS=64016]/Protein containing three WD domains (WD-40 repeats), which likely mediate protein-protein interactions                                                                                                                                                                                                                                   |
| SW:GBB1_HUMAN  | GNB1     | 41            | 27 | 1.27 | 0.26 | SW:GBB1_HUMAN P04901 homo sapiens (human), mus musculus (mouse), bos taurus (bovine), and canis familiaris (dog). guanine nucleotide-binding protein g(i)/g(s)/g(t) beta subunit 1 (transducin beta chain [MASS=37377]/Guanine nucleotide binding protein (G protein) beta 1, a component of heterotrimeric G protein complexes, plays a role in signal transduction                                                                         |
| SW:MDHC_HUMAN  | MDH1     | 18            | 4  | 1.27 | 0.10 | SW:MDHC_HUMAN P40925 homo sapiens (human). malate dehydrogenase, cytoplasmic (ec 1.1.1.37). 5/2000 [MASS=36295]/Cytosolic malate dehydrogenase, part of the malate-aspartate shuttle where it putatively catalyzes the reduction of oxaloacetate to malate                                                                                                                                                                                   |
| GP:AF022728_1  | DTNB     | 11            | 1  | 1.27 | 0.00 | GP:AF022728_1 Homo sapiens beta-dystrobrevin (BDTN) mRNA, complete cds; member of the dystrophin gene family. [MASS=71356]/Beta-dystrobrevin, a member of the dystrobrevin subfamily within the dystrophin family of proteins, part of the syntrophin-associated protein complex                                                                                                                                                             |
| SW:CD81_HUMAN  | CD81     | 6             | 2  | 1.27 | 0.06 | SW:CD81_HUMAN P18582 homo sapiens (human), and pan troglodytes (chimpanzee). cd81 antigen (26 kda cell surface protein tapa-1). 5/2000 [MASS=25809]/CD81 antigen, member of the transmembrane 4 superfamily (TM4SF) that regulates lymphoma cell growth, may be involved in cell motility and the defense response, associates with integrins in the plasma membrane                                                                         |
| SW:THIK_HUMAN  | ACAA1    | 18, 19        | 15 | 1.26 | 0.25 | SW:THIK_HUMAN P09110 homo sapiens (human). 3-ketoacyl-coa thiolase, peroxisomal precursor (ec 2.3.1.16) (beta-ketothiolase) (acetyl-coa acyltransferase) (peroxisomal 3-oxoacyl-coa thiolase). 7/1999 [MASS=44292]/Peroxisomal 3-oxoacyl-coenzyme A thiolase (peroxisomal 3-ketoacyl-Coenzyme A thiolase), functions in peroxisomal beta-oxidation of fatty acids, deficiency is associated with rhizomelic chondrodysplasia punctata (RCDP) |
| GP:AC005788_1  | XPTP     | 45            | 4  | 1.26 | 0.20 | GP:AC005788_1 Homo sapiens chromosome 19, cosmid R26652, complete sequence; protein tyrosine phosphatase sigma. [MASS=157056]                                                                                                                                                                                                                                                                                                                |
| GP:AB028128_1  | DPM3     | 5, 34         | 2  | 1.25 | 0.51 | GP:AB028128_1 Homo sapiens DPM3 mRNA for dolichol-phosphate-mannose synthase, complete cds. [MASS=10080]/Dolichyl-phosphate mannosyltransferase subunit 3 (prostn 1), part of a complex that produces mannosyl donors for glycoconjugate biosynthesis, stabilizes DPM1 and is stabilized by DPM2; expression is associated with a lack of invasive potential in tumors                                                                       |
| SW:SR09_HUMAN  | SRP9     | 35, 36        | 7  | 1.25 | 0.29 | SW:SR09_HUMAN P49458 homo sapiens (human). signal recognition particle 9 kda protein (srp9). 12/1998 [MASS=9981]/Signal recognition particle 9 kDa, a subunit of the signal recognition particle that forms the Alu RNA-binding protein and binds to Alu RNA with SRP14, involved in translocation of newly synthesized proteins across the membrane of the rough ER                                                                         |
| SWN:SYFB_HUMAN | FRSB     | 2, 25, 35, 37 | 4  | 1.25 | 0.44 | SWN:SYFB_HUMAN Q9nsd9 homo sapiens (human). phenylalanyl-trna synthetase beta chain (ec 6.1.1.20) (phenylalanine--trna ligase beta chain) (phers) (protein hspc173). 8/2001 [MASS=66130]/Phenylalanyl-tRNA synthetase beta-subunit, regulatory subunit that forms heterodimers with the catalytic alpha subunit (FARSL), involved in protein synthesis, may play a role in tumorigenic events                                                |
| GP:AB046829_1  | KIAA1609 | 45            | 1  | 1.25 | 0.00 | GP:AB046829_1 Homo sapiens mRNA for KIAA1609 protein, partial cds; Start codon is not identified.. [MASS=52735]/Protein of unknown function                                                                                                                                                                                                                                                                                                  |
| SW:PTPA_HUMAN  | PPP2R4   | 45            | 2  | 1.25 | 0.01 | SW:PTPA_HUMAN P18433 homo sapiens (human). protein-tyrosine phosphatase alpha precursor (ec 3.1.3.48) (r-ptp- alpha). 5/2000 [MASS=90600]/Phosphotyrosyl phosphatase activator, regulatory subunit of protein phosphatase 2A, involved in cell cycle control and may protect against oxidative DNA damage                                                                                                                                    |
| SWN:UNRI_HUMAN | UNRIP    | 45            | 4  | 1.25 | 0.20 | SWN:UNRI_HUMAN Q9y3f4 homo sapiens (human). unr-interacting protein (wd-40 repeat protein pt-wd). 8/2001 [MASS=38438]/Unr-interacting protein, has WD domain, interacts with unr (NR1H2) protein and may function in the transforming growth receptor signaling pathway; upregulated in breast cancer and may contribute to tumor progression                                                                                                |
| GPN:AF279372_1 | ITPK1    | 41            | 3  | 1.25 | 0.11 | GP:BC018192_1 Homo sapiens, inositol 1,3,4-triphosphate 5/6 kinase, clone MGC:21491 IMAGE:3867269, mRNA, complete cds. [MASS=45621]/Inositol 1,3,4-triphosphate 5-6 kinase, phosphorylates Ins(1,3,4)P3 to form Ins(1,3,4,5)P4 and Ins(1,3,4,6)P4, regulates inositol phosphate metabolism; variant form phosphorylates Ins(3,4,5,6)P4 to yield Ins(1,3,4,5,6)P5                                                                             |
| SW:TRA2_HUMAN  | TRAF2    | 41            | 2  | 1.25 | 0.26 | SW:TRA2_HUMAN Q12933 homo sapiens (human). tnfr receptor associated factor 2 (traf2) (tumor necrosis factor type 2 receptor associated protein 3). 5/2000 [MASS=55794]/TNF receptor-associated factor 2, interacts with and mediates tumor necrosis factor signaling through activation of NF-kappaB cascade, functions as an apoptosis inhibitor                                                                                            |
| GP:AF034544_1  | DHCR7    | 19            | 6  | 1.25 | 0.30 | GP:AF034544_1 Homo sapiens delta7-sterol reductase mRNA, complete cds; D7SR. [MASS=54516]/7-dehydrocholesterol reductase, catalyzes the reduction of the C7-C8 (delta 7) double bond of 7-dehydrocholesterol in the last step of cholesterol biosynthesis; mutations in the corresponding gene are associated with Smith-Lemli-Opitz                                                                                                         |
| SW:NPL1_HUMAN  | NAP1L1   | 7, 12, 15     | 1  | 1.24 | 0.00 | SW:NPL1_HUMAN P55209 homo sapiens (human). nucleosome assembly protein 1-like 1 (nap-1 related protein). 10/1996 [MASS=45374]/Nucleosome assembly protein 1-like 1, member of the NAP/SET protein family, binds histones H2A and H2B, a histone chaperone that mediates assembly of nucleosomes, complex with histone acetyltransferase coactivator p300 (EP300) may stimulate transcription                                                 |
| SW:PI52_HUMAN  | PIP5K2A  | 19, 41        | 1  | 1.24 | 0.00 | SW:PI52_HUMAN P48426 homo sapiens (human). phosphatidylinositol-4-phosphate 5-kinase type ii alpha (ec 2.7.1.68) (pip5kii-alpha) (1-phosphatidylinositol-4-phosphate kinase) (ptdins(4)p-5-kinase b isofor [MASS=46193]/Phosphatidylinositol-4-phosphate 5-kinase type II, alpha, a member of a family of kinases responsible for the synthesis of PtdIns(4,5)P2                                                                             |

|                |          |            |    |      |      |                                                                                                                                                                                                                                                                                                                                                                                                                                                                                         |
|----------------|----------|------------|----|------|------|-----------------------------------------------------------------------------------------------------------------------------------------------------------------------------------------------------------------------------------------------------------------------------------------------------------------------------------------------------------------------------------------------------------------------------------------------------------------------------------------|
| SW:DYL1_HUMAN  | PIN      | 11, 16, 26 | 10 | 1.24 | 0.34 | SW:DYL1_HUMAN Q15701 homo sapiens (human), mus musculus (mouse), rattus norvegicus (rat), and oryctolagus cuniculus (rabbit). dynein light chain 1, cytoplasmic (protein inhibitor of neuronal nitric oxid [MASS=10366]/Dynein cytoplasmic light polypeptide (protein inhibitor of nitric oxide synthase), a component of the cytoplasmic dynein motor complex, inhibits neuronal nitric oxide synthase (NOS1), regulates the proapoptotic activity of BCL2-interacting protein BCL2L11 |
| GPN:AB014729_1 | SMAP1    | 45         | 2  | 1.24 | 0.01 | GP:AB014729_1 Homo sapiens mRNA for SMAP-1, complete cds; tetratricopeptide repeat (TPR motif). [MASS=101675]/Protein containing two putative arf GTPase activation (GAP) domains, which have C-4 class zinc fingers, has a region of moderate similarity to a region of centaurin-alpha (human CENTA1), which is a PtdIns(3,4,5)P3-binding protein                                                                                                                                     |
| GPN:AL136131_4 | MRPS18A  | 45         | 1  | 1.24 | 0.00 | GPN:AL136131_4 Human DNA sequence from clone RP1-261G23 on chromosome 6p12.2-21.1 Contains ESTs, STSs, GSSs and CpG islands. Contains the KIAA0110 gene, two novel genes, a novel pseudogene similar to OPA-interacting protein (OIP1), a putative novel gene, and the VE [MASS=22184]/Mitochondrial ribosomal protein S18A, component of the small (28S) ribosomal subunit of mitochondria                                                                                             |
| PIR2:T42646    | KIAA0731 | 45         | 2  | 1.24 | 0.00 | PIR2:T42646 hypothetical protein DKFZp727K171.1 - human (fragment) [MASS=64691]/Protein of unknown function, has a region of moderate similarity to a region of Sjogren syndrome antigen B (human SSB), which is an RNA-binding protein that regulates translation and is associated with Sjogren syndrome and systemic lupus erythematosus                                                                                                                                             |
| SW:COPD_HUMAN  | ARCN1    | 45         | 2  | 1.24 | 0.07 | SW:COPD_HUMAN P48444 homo sapiens (human). coatomer delta subunit (delta-coat protein) (delta-cop) (archain). 11/1997 [MASS=57210]/Archain 1, a putative structural protein that is ubiquitously expressed and may play a role in intracellular protein trafficking                                                                                                                                                                                                                     |
| GP:AF257077_1  | EIF2B3   | 35         | 2  | 1.24 | 0.11 | GP:AF257077_1 Homo sapiens eukaryotic translation initiation factor EIF2B subunit 3 (EIF2B3) mRNA, complete cds; eukaryotic translation initiation factor EIF2Bgamma; guanine nucleotide exchange factor. [MASS=50240]/Eukaryotic translation initiation factor 2B gamma subunit, has a putative role in the initiation of protein synthesis; acts as a cofactor for hepatitis C virus IRES-mediated translation                                                                        |
| SW:ODPX_HUMAN  | PDX1     | 5          | 3  | 1.24 | 0.16 | SW:ODPX_HUMAN O00330 homo sapiens (human). pyruvate dehydrogenase protein x component, mitochondrial precursor (dihydropyruvate dehydrogenase-binding protein of pyruvate dehydrogenase complex) (e3-bind [MASS=54138]/Dihydropyruvate dehydrogenase-binding protein (protein X), lipoyl-containing component of the pyruvate dehydrogenase complex, anchors the dihydropyruvate dehydrogenase (E3) to the dihydropyruvate transacetylase (E2) core, deficiency causes disease          |
| GP:AB033767_1  | C20orf3  | 45         | 1  | 1.23 | 0.00 | GP:AB033767_1 Homo sapiens BSCv mRNA, partial cds; brain-selective and closely mapped on the counter allele of CMAP in cystatin cluster. [MASS=47746]/Member of the strictosidine synthase family, which catalyze the condensation of tryptamine with secologanin to form strictosidine, has low similarity to uncharacterized C. elegans F57C2.5                                                                                                                                       |
| SWN:PM5P_HUMAN | PM5      | 45         | 4  | 1.23 | 0.27 | SWN:PM5P_HUMAN Q15155 homo sapiens (human). protein pm5 precursor. 8/2001 [MASS=134321]/Protein of unknown function, has low similarity to uncharacterized C. elegans C02E11.1                                                                                                                                                                                                                                                                                                          |
| SWN:TALI_HUMAN | TLN      | 45         | 1  | 1.23 | 0.00 | SWN:TALI_HUMAN Q9y490 homo sapiens (human). talin. 8/2001 [MASS=269718]/Talin 1, a component of focal adhesion sites, links integrins to the actin cytoskeleton, binds phospholipids, and mediates other interactions at the cytoplasmic face of cell/matrix contacts, important for cell spreading and motility                                                                                                                                                                        |
| SW:PCB1_HUMAN  | PCBP1    | 37         | 20 | 1.23 | 0.19 | SW:PCB1_HUMAN Q15365 homo sapiens (human). poly(rc)-binding protein 1 (hnmp-e1) (nucleic acid binding protein sub2.3) (alpha-cp1). 5/2000 [MASS=37526]/Poly(rC)-binding protein 1, contains KH RNA-binding domains, binds poly(rC) RNA, acts as a translational repressor and plays a role in mRNA stability                                                                                                                                                                            |
| SW:IF2G_HUMAN  | EIF2S3   | 35         | 22 | 1.23 | 0.22 | SW:IF2G_HUMAN P41091 homo sapiens (human). eukaryotic translation initiation factor 2 gamma subunit (eif-2-gamma). 5/2000 [MASS=50978]/Eukaryotic initiation factor 2G, gamma subunit of the heterotrimeric GTP binding protein involved in recruitment of Met-tRNAi to the 40S ribosomal subunit, activity is regulated by herpes simplex virus type 1 gamma 34.5 and by the cellular GADD34 proteins                                                                                  |
| SW:IF37_HUMAN  | EIF3S7   | 35         | 6  | 1.23 | 0.32 | SW:IF37_HUMAN O15371 homo sapiens (human). eukaryotic translation initiation factor 3 subunit 7 (eif-3 zeta) (eif3 p66). 5/2000 [MASS=63973]/Eukaryotic translation initiation factor 3 subunit 7, mRNA-binding subunit of the translation initiation factor 3 complex, which mediates dissociation of 80S ribosomes and stabilizes initiator Met-tRNAi binding to 40S subunits                                                                                                         |
| SW:RL4_HUMAN   | RPL4     | 35         | 17 | 1.23 | 0.33 | SW:RL4_HUMAN P36578 homo sapiens (human). 60s ribosomal protein L4 (l1). 12/1998 [MASS=47759]/Ribosomal protein L4, a putative component of the large 60S ribosomal subunit, may bind RNA                                                                                                                                                                                                                                                                                               |
| SW:RS17_HUMAN  | RPS17    | 35         | 6  | 1.23 | 0.24 | SW:RS17_HUMAN P08708 homo sapiens (human). 40s ribosomal protein s17. 8/1992 [MASS=15419]/Ribosomal protein S17, component of the small 40S ribosomal subunit                                                                                                                                                                                                                                                                                                                           |
| SW:RS3A_HUMAN  | RPS3A    | 35         | 13 | 1.23 | 0.20 | SW:RS3A_HUMAN P49241 homo sapiens (human), and felis silvestris catus (cat). 40s ribosomal protein s3a. 5/2000 [MASS=29814]/Ribosomal protein S3A (v fos transformation effector), component of the 40S ribosomal subunit, may play roles in apoptosis, cell growth and protein biosynthesis                                                                                                                                                                                            |
| GP:AB020723_1  | KIAA0916 | 7          | 1  | 1.23 | 0.00 | GP:AB020723_1 Homo sapiens mRNA for KIAA0916 protein, partial cds; k06582 cDNA clone for KIAA0916 has a nucleotide substitution at the position 1955 (C- T; nonsense mutation) of the sequence of KIAA0916.. [MASS=134896]/Protein associated with Myc, a putative transcriptional regulator that binds the Myc oncoprotein (human Myc) and may regulate Myc activated transcription, binds and inhibits adenylyl cyclase types I (ADCY1) and V (ADCY6)                                 |
| SW:ODB2_HUMAN  | DBT      | 2          | 1  | 1.23 | 0.00 | SW:ODB2_HUMAN P11182 homo sapiens (human). lipoyamide acyltransferase component of branched-chain alpha-keto acid dehydrogenase complex, mitochondrial precursor (ec 2.3.1.-) (e2) (dihydropyruvate branch [MASS=53487]/Dihydropyruvate branched chain transacylase E2, a subunit of the branched-chain alpha-ketoacid dehydrogenase complex; mutation of the corresponding gene causes type II maple syrup urine disease (branched chain alpha ketoaciduria)                           |

|               |           |                |    |      |      |                                                                                                                                                                                                                                                                                                                                                                                                                                                                           |
|---------------|-----------|----------------|----|------|------|---------------------------------------------------------------------------------------------------------------------------------------------------------------------------------------------------------------------------------------------------------------------------------------------------------------------------------------------------------------------------------------------------------------------------------------------------------------------------|
| SW:INSR_HUMAN | INSR      | 5, 18, 34, 41  | 2  | 1.22 | 0.02 | SW:INSR_HUMAN P06213 homo sapiens (human). insulin receptor precursor (ec 2.7.1.112) (ir). 5/2000 [MASS=156281]/Insulin receptor, a transmembrane receptor protein tyrosine kinase involved in carbohydrate metabolism, energy pathways, and cell growth; gene mutation is associated with insulin-resistant diabetes mellitus and leprechaunism                                                                                                                          |
| SW:PAB1_HUMAN | PABPC1    | 24, 25, 35, 39 | 13 | 1.22 | 0.44 | SW:PAB1_HUMAN P11940 homo sapiens (human). polyadenylate-binding protein 1 (poly(a) binding protein 1) (pabp 1). 7/1998 [MASS=70671]/Poly(A)-binding protein cytoplasmic 1, binds to poly(A) tails of mRNA and plays roles in regulating mRNA stability and translation, also implicated in mRNA transport from the nucleus to the cytoplasm                                                                                                                              |
| GP:AF084523_1 | CREG      | 16, 29         | 1  | 1.22 | 0.00 | GP:AF084523_1 Homo sapiens cellular repressor of E1A-stimulated genes CREG mRNA, complete cds. [MASS=24075]/Repressor of transcriptional activation and transformation by the adenovirus E1A protein, binds the general transcription factor TBP and the tumor suppressor pRb (RB1), involved in transcriptional control of cell growth and differentiation                                                                                                               |
| SW:HS9B_HUMAN | HSPCB     | 10, 33         | 10 | 1.22 | 0.52 | SW:HS9B_HUMAN P08238 homo sapiens (human). heat shock protein hsp 90-beta (hsp 84) (hsp 90). 5/2000 [MASS=83163]/Heat shock 90kD protein 1 beta, involved in regulation of both cytochrome c-dependent apoptosis and antiapoptosis via the Akt/PKB (AKT1) serine-threonine kinase, elevated expression is reported in patients with active systemic lupus erythematosus (SLE)                                                                                             |
| SW:EF12_HUMAN | EEF1A2    | 35             | 6  | 1.22 | 0.11 | SW:EF12_HUMAN Q05639 homo sapiens (human). elongation factor 1-alpha 2 (ef-1-alpha-2) (statin s1). 12/1998 [MASS=50470]/Eukaryotic translation elongation factor 1 alpha 2, a putative translation elongation factor, upregulated in an estrogen receptor-expressing breast carcinoma cell line; mutation in mouse Eef1a2 causes the multiple-defect wasted phenotype                                                                                                     |
| GP:D87684_1   | UBXD2     | 32             | 6  | 1.22 | 0.16 | GP:D87684_1 Homo sapiens mRNA for KIAA0242 protein, partial cds; Start codon is not identified. ha03111 cDNA clone for KIAA0242 has a 94-bp deletion at the region from 573 to 666 of the sequence of KIAA0242; similar to a C.elegans ZK353.8 protein (S44655). [MASS=59094]/Protein containing a UBX domain, which are found in ubiquitin regulatory proteins, has low similarity to uncharacterized C. elegans ZK353.8                                                 |
| SW:NDK6_HUMAN | NME2      | 25             | 1  | 1.22 | 0.00 | SW:NDK6_HUMAN O60361 homo sapiens (human). putative nucleoside diphosphate kinase (ec 2.7.4.6) (ndk) (ndp kinase). 12/1998 [MASS=15529]/Nucleoside diphosphate kinase B, a transcription factor and endodeoxyribonuclease that binds to the Myc promoter, may function in DNA repair, may suppress metastasis in some tumors, displays reduced expression in breast carcinoma cells                                                                                       |
| SW:LMB2_HUMAN | LAMB2     | 6              | 2  | 1.22 | 0.15 | SW:LMB2_HUMAN P55268 homo sapiens (human). laminin beta-2 chain precursor (s-laminin). 7/1999 [MASS=196080]/Laminin beta 2 (s-laminin), a basement membrane protein that forms a heterotrimer with other laminin proteins, mediates cell-matrix adhesion, cell migration, and possibly wound healing; lower expression is associated with Walker Warburg Syndrome                                                                                                         |
| SW:GLCM_HUMAN | GBA       | 5, 19          | 2  | 1.21 | 0.09 | SW:GLCM_HUMAN P04062 homo sapiens (human). glucosylceramidase precursor (ec 3.2.1.45) (beta-glucocerebrosidase) (acid beta-glucosidase) (d-glucosyl-n-acylsphingosine glucohydrolase) (alglucerase) (imigl [MASS=59697]/Acid beta glucosidase (beta-glucocerebrosidase), a lysosomal membrane protein that hydrolyzes glucosylceramide and glucosylsphingosine, may play a role in epidermal differentiation; mutations in the corresponding gene cause Gaucher's disease |
| SW:ER60_HUMAN | ERP60     | 24, 41         | 17 | 1.21 | 0.54 | SW:ER60_HUMAN P30101 homo sapiens (human). probable protein disulfide isomerase er-60 precursor (ec 5.3.4.1) (erp60) (58 kda microsomal protein) (p58) (grp58) (erp57). 7/1998 [MASS=56782]/Glucose regulated 58kDa protein, acts as a protein disulfide isomerase and possibly a protease, involved in folding and maturation of N-linked glycoproteins and MHC class I antigen processing; identified as a sperm antigen in immunological infertility                   |
| GP:AB018790_1 | LOC244373 | 45             | 1  | 1.21 | 0.00 | GP:AB018790_1 Homo sapiens gene, complete cds, similar to Caenorhabditis elegans C42C1.9 gene sequence; similar to Caenorhabditis elegans C42C1.9 gene sequence in GenBank Accession Number AF043695. [MASS=37840]                                                                                                                                                                                                                                                        |
| GP:AF271388_1 | CMAS      | 45             | 3  | 1.21 | 0.16 | GP:AF271388_1 Homo sapiens CMP-N-acetylneuraminic acid synthase mRNA, complete cds. [MASS=48379]/Protein with strong similarity to cytidine monophospho-N-acetylneuraminic acid synthetase (mouse Cmas), which generates the activated sugar nucleotide CMP-N-acetylneuraminic acid for use by sialyltransferases, member of the cytidylyltransferase                                                                                                                     |
| GP:AK002135_1 | FLJ11273  | 45             | 1  | 1.21 | 0.00 | GP:AK002135_1 Homo sapiens cDNA FLJ11273 fis, clone PLACE1009338; unnamed protein product. [MASS=31113]/Protein of unknown function, has high similarity to uncharacterized human MGC5576                                                                                                                                                                                                                                                                                 |
| GP:AF000560_1 | TIP20     | 29             | 2  | 1.21 | 0.57 | GP:AF000560_1 Homo sapiens TTF-I interacting peptide 20 mRNA, partial cds; TIP20; Transcription Termination Factor I Interacting Peptide 20. [MASS=40770]/TTF-I interacting peptide 20, a protein that contains a putative nucleic acid-binding C2H2 type zinc finger domain                                                                                                                                                                                              |
| SW:A2HS_HUMAN | AHSG      | 16             | 4  | 1.21 | 0.13 | SW:A2HS_HUMAN P02765 homo sapiens (human). alpha-2-hs-glycoprotein precursor (fetuin) (alpha-2-z-globulin). 5/2000 [MASS=39325]/Alpha 2-HS-glycoprotein, inhibits insulin receptor (INSR) tyrosine kinase activity and may play roles in bone metabolism, monocyte recruitment, cell death, cell adhesion, and the immune response; genotype may be associated with osteoporosis and stature                                                                              |
| SW:AATM_HUMAN | GOT2      | 2              | 4  | 1.21 | 0.02 | SW:AATM_HUMAN P00505 homo sapiens (human). aspartate aminotransferase, mitochondrial precursor (ec 2.6.1.1) (transaminase a) (glutamate oxaloacetate transaminase-2). 7/1999 [MASS=47476]/Mitochondrial aspartate aminotransferase (glutamic oxaloacetic transaminase), catalyzes the reversible transfer of the amino group from aspartate to 2-oxoglutarate to form oxaloacetate and glutamate                                                                          |
| SW:TRSR_HUMAN | TFRC      | 26, 42         | 2  | 1.20 | 0.12 | SW:TRSR_HUMAN P02786 homo sapiens (human). transferrin receptor protein (tr) (antigen cd71) (t9) (p90). 7/1999 [MASS=84901]/Transferrin receptor, binds and internalizes the iron carrier transferrin, involved in iron homeostasis, important for neurologic development and likely erythropoiesis, expression is deregulated in anemia, hemochromatosis, and Friedreich's ataxia                                                                                        |



|               |          |        |    |      |      |                                                                                                                                                                                                                                                                                                                                                                                                                                                                    |
|---------------|----------|--------|----|------|------|--------------------------------------------------------------------------------------------------------------------------------------------------------------------------------------------------------------------------------------------------------------------------------------------------------------------------------------------------------------------------------------------------------------------------------------------------------------------|
| SW:IPYR_HUMAN | PP       | 26, 27 | 1  | 1.20 | 0.00 | SW:IPYR_HUMAN Q15181 homo sapiens (human). inorganic pyrophosphatase (ec 3.6.1.1) (pyrophosphate phosphohydrolase) (ppase). 5/2000 [MASS=32660]/Inorganic pyrophosphatase, catalyzes the hydrolysis of pyrophosphate to inorganic phosphate                                                                                                                                                                                                                        |
| GP:AB038995_1 | LOC51762 | 45     | 1  | 1.20 | 0.00 | GP:AB038995_1 Homo sapiens mRNA for RAB-8b protein, complete cds. [MASS=23584]/Member of the Ras superfamily of GTP-binding proteins, has very strong similarity to rat Rn.10995 (Rab8b), which is a member of the Rab family of small GTP binding proteins                                                                                                                                                                                                        |
| GP:AK001050_1 | FLJ10188 | 45     | 1  | 1.20 | 0.00 | GP:AK001050_1 Homo sapiens cDNA FLJ10188 fis, clone HEMBA1004693; unnamed protein product. [MASS=30704]/Protein of unknown function                                                                                                                                                                                                                                                                                                                                |
| GP:AK024781_1 | FLJ21128 | 45     | 2  | 1.20 | 0.05 | GP:AK024781_1 Homo sapiens cDNA: FLJ21128 fis, clone CAS06258; unnamed protein product. [MASS=56106]/Member of the YjeF-related protein N-terminus containing family, has weak similarity to uncharacterized C. albicans Orf6.                                                                                                                                                                                                                                     |
| SW:2ABA_HUMAN | PPP2R2A  | 45     | 2  | 1.20 | 0.03 | SW:2ABA_HUMAN Q00007 h serine/threonine protein phosphatase 2a, 55 kda regulatory subunit b, alpha isoform (pp2a, subunit b, b-alpha isoform) (pp2a, subunit b, b55-alpha isoform) (pp2a, subunit b, pr55- [MASS=51692]/Protein phosphatase 2 regulatory subunit B alpha isoform, determines the substrate affinity and regulates the kinetics of protein phosphatase 2, expression is decreased in the hippocampus of Alzheimer's disease patients                |
| SW:VAB1_HUMAN | ATP6B1   | 42     | 2  | 1.20 | 0.08 | SW:VAB1_HUMAN P15313 homo sapiens (human). vacuolar atp synthase subunit b, kidney isoform (ec 3.6.1.34) (endomembrane proton pump 58 kda subunit) (v-atpase b subunit). 5/2000 [MASS=56980]/Vacuolar H+-ATPase proton pump (B1 kidney isoform of the B subunit), mediates distal nephron acid secretion and the interaction between V-ATPase and F-actin; variants are associated with renal tubular acidosis accompanied with sensorineural deafness             |
| GP:AB002313_1 | PLXNB    | 41     | 12 | 1.20 | 0.40 | GP:AB002313_1 Human mRNA for KIAA0315 gene, partial cds. [MASS=205412]/Plexin B2, putative semaphorin receptor that may be involved in mediating cell guidance                                                                                                                                                                                                                                                                                                     |
| SW:RS14_HUMAN | RPS14    | 35     | 3  | 1.20 | 0.12 | SW:RS14_HUMAN P06366 homo sapiens (human), and cricetus griseus (chinese hamster). 40s ribosomal protein s14. 8/1992 [MASS=16273]/Ribosomal protein S14, a putative component of the small 40S ribosomal subunit, may play a role in protein biosynthesis, may bind RNA, upregulated in prostate carcinoma cell lines                                                                                                                                              |
| SW:EPA7_HUMAN | EPHA7    | 34, 41 | 2  | 1.19 | 0.14 | SW:EPA7_HUMAN Q15375 homo sapiens (human). ephrin type-a receptor 7 precursor (ec 2.7.1.112) (tyrosine-protein kinase receptor ehk-3) (epf homology kinase-3) (receptor protein-tyrosine kinase hek11). 5 [MASS=112097]/Ephrin type A receptor 7, an Eph-related receptor tyrosine kinase, interacts with the PDZ domain of the Ras binding protein AF6 (MLLT4), may be involved in cell signaling                                                                 |
| SW:CYP4_HUMAN | PPID     | 31, 33 | 1  | 1.19 | 0.00 | SW:CYP4_HUMAN Q08752 homo sapiens (human). 40 kda peptidyl-prolyl cis-trans isomerase (ec 5.2.1.8) (ppiase) (rotamase) (cyclophilin-40) (cyp-40) (cyclophilin-related protein). 5/2000 [MASS=40764]/Peptidylprolyl isomerase D, cyclosporin A and HSPCA-binding peptidylprolyl isomerase, part of steroid receptor and mitochondrial permeability transition pore complexes, may regulate protein trafficking, steroid receptor signal transduction, and apoptosis |
| GP:AK022956_1 | TBLR1    | 45     | 1  | 1.19 | 0.00 | GP:AK022956_1 Homo sapiens cDNA FLJ12894 fis, clone NT2RP2004170, moderately similar to Homo sapiens mRNA for transducin (beta) like 1 protein; unnamed protein product. [MASS=55569]/Protein with strong similarity to transducin (beta)-like 1 (human TBL1), which binds histone H3 and is part of the SMRT corepressor complex and may be involved in vision and hearing, contains eight WD domains (WD-40 repeats)                                             |
| PIR2:S55474   | LLGL2    | 45     | 1  | 1.19 | 0.00 | PIR2:S55474 Human giant larvae homolog - human [MASS=112908]/Protein with high similarity to lethal giant larvae (Drosophila) homolog 1 (human LLGL1), which is a nonmuscle myosin II heavy chain-associating cytoskeletal protein that may be linked to Smith-Magenis Syndrome, contains three WD domains (WD-40 repeats)                                                                                                                                         |
| SW:1A01_HUMAN | HAAA     | 45     | 4  | 1.19 | 0.02 | SW:1A01_HUMAN P30443 homo sapiens (human). hla class i histocompatibility antigen, a-1 alpha chain precursor. 5/2000 [MASS=40846]/Major histocompatibility complex class I-A, binds antigenic peptides, associates with beta 2-microglobulin (B2M) to form a complex that contributes to self-recognition by cytotoxic T lymphocytes                                                                                                                               |
| SW:GAL1_HUMAN | GALK1    | 5      | 1  | 1.19 | 0.00 | SW:GAL1_HUMAN P51570 homo sapiens (human). galactokinase 1 (ec 2.7.1.6). 5/2000 [MASS=42272]/Galactokinase 1, an essential enzyme for galactose metabolism, catalyzes the ATP-dependent phosphorylation of galactose to produce galactose-1-phosphate, deficiency leads to cataract formation                                                                                                                                                                      |
| PIR2:T00387   | CLASP1   | 7, 23  | 1  | 1.18 | 0.00 | PIR2:T00387 KIAA0622 protein - human (fragment) [MASS=141604]/CLIP-associating protein 1 (Mast), a microtubule-associated protein with a putative role in centrosome separation and organization of the bipolar mitotic spindle                                                                                                                                                                                                                                    |
| SW:COXS_HUMAN | COX17    | 18, 42 | 1  | 1.18 | 0.00 | SW:COXS_HUMAN Q14061 homo sapiens (human). cytochrome c oxidase copper chaperone. 7/1999 [MASS=6784]/Cytochrome c oxidase assembly protein 17, a putative copper binding protein, may function to transport copper to mitochondria for assembly into cytochrome oxidase complex; mutation does not appear to be a common cause of COX deficiency disorders                                                                                                         |
| SW:GBI2_HUMAN | GNAI2    | 16, 41 | 1  | 1.18 | 0.00 | SW:GBI2_HUMAN P04899 homo sapiens (human). guanine nucleotide-binding protein g(i), alpha-2 subunit (adenylate cyclase-inhibiting g alpha protein). 12/1998 [MASS=40320]/G protein alpha subunit i2, a component of pertussis toxin sensitive heterotrimeric G protein complexes that transduces signals to effectors and inhibits adenylate cyclase; mutations in the gene are associated with tachycardia and endocrine tumors                                   |
| SW:RS3_HUMAN  | RPS3     | 45     | 5  | 1.18 | 0.40 | SW:RS3_HUMAN P23396 homo sapiens (human). 40s ribosomal protein s3. 2/1996 [MASS=26688]/Ribosomal protein S3, a putative component of the small 40S ribosomal subunit, has DNA endonuclease activity, endonuclease activity is absent in Xeroderma pigmentosum group D patients, expression is increased in colorectal cancer                                                                                                                                      |
| SW:VATG_HUMAN | ATP6G1   | 45     | 1  | 1.18 | 0.00 | SW:VATG_HUMAN O75348 homo sapiens (human). vacuolar atp synthase subunit g (ec 3.6.1.34) (v-atpase 13 kda subunit) (vacuolar h(+)-atpase subunit g) (vacuolar atp synthase subunit m16). 5/2000 [MASS=13758]/Member of the vacuolar (H+)-ATPase G subunit family, which may couple ATP degradation to H+ translocation, has high similarity to uncharacterized human ATP6G2                                                                                        |

|               |                               |                |    |      |      |                                                                                                                                                                                                                                                                                                                                                                                                                                                                  |
|---------------|-------------------------------|----------------|----|------|------|------------------------------------------------------------------------------------------------------------------------------------------------------------------------------------------------------------------------------------------------------------------------------------------------------------------------------------------------------------------------------------------------------------------------------------------------------------------|
| SW:CATD_HUMAN | CTSD                          | 32             | 17 | 1.18 | 0.28 | SW:CATD_HUMAN P07339 homo sapiens (human). cathepsin d precursor (ec 3.4.23.5). 2/1996 [MASS=44552]/Cathepsin D, a lysosomal aspartyl protease that is induced by estrogen and degrades intracellular and endocytosed proteins, a positive mediator of apoptosis; abnormal expression observed in tumor cell proliferation and metastasis                                                                                                                        |
| PIR2:T00361   | KIAA0678                      | 10             | 3  | 1.18 | 0.16 | PIR2:T00361 hypothetical protein KIAA0678 - human (fragment) [MASS=114535]/Protein containing a DnaJ domain, which are part of chaperone (protein folding) system that mediates interaction with heat shock proteins, has moderate similarity to a region of <i>C. elegans</i> rme-8, which is required for some types of endocytosis                                                                                                                            |
| SW:MYSO_HUMAN | MYH10                         | 10             | 4  | 1.18 | 0.49 | SW:MYSO_HUMAN P35580 homo sapiens (human). myosin heavy chain, nonmuscle type b (cellular myosin heavy chain, type b) (nmhcb). 12/1998 [MASS=228939]/Myosin heavy chain 10 (non-muscle), a putative ATP- and actin-binding motor protein; expression of an alternative splice form is coincident with neuronal cell differentiation                                                                                                                              |
| SW:RS29_HUMAN | RPS29                         | 11, 35         | 1  | 1.17 | 0.00 | SW:RS29_HUMAN P30054 homo sapiens (human), mus musculus (mouse), rattus norvegicus (rat), and bos taurus (bovine). 40s ribosomal protein s29. 5/2000 [MASS=6546]/Ribosomal protein S29, a component of the small 40S ribosomal subunit, contains a zinc finger-like motif, enhances activity of the tumor suppressor Krev-1 (RAP1A)                                                                                                                              |
| SW:PEBP_HUMAN | PBP                           | 11, 16, 19, 26 | 2  | 1.17 | 0.15 | SW:PEBP_HUMAN P30086 homo sapiens (human). phosphatidylethanolamine-binding protein (pebp) (neuropolypeptide h3). 7/1999 [MASS=20926]/Phosphatidylethanolamine-binding protein, binds GTP, may regulate cAMP accumulation, enhance acetylcholine synthesis, and play a role in organizing phospholipids in the myelin sheath                                                                                                                                     |
| GP:AB033011_1 | KIAA1185                      | 45             | 7  | 1.17 | 0.22 | GP:AB033011_1 Homo sapiens mRNA for KIAA1185 protein, partial cds; Start codon is not identified.. [MASS=44499]/Protein containing a leucine rich repeat, which mediates protein-protein interactions, has a region of low similarity to a region of phenylalanyl-tRNA synthetase beta-subunit (human PheHB), which is involved in protein synthesis and possibly tumorigenesis                                                                                  |
| GP:AF151062_1 | LIP5 LYST-interacting protein | 45             | 8  | 1.17 | 0.25 | GP:AF151062_1 Homo sapiens HSPC228 mRNA, complete cds. [MASS=33677]                                                                                                                                                                                                                                                                                                                                                                                              |
| SW:HEXB_HUMAN | HEXB                          | 45             | 6  | 1.17 | 0.22 | SW:HEXB_HUMAN P07686 homo sapiens (human). beta-hexosaminidase beta chain precursor (ec 3.2.1.52) (n-acetyl-beta-glucosaminidase) (beta-n-acetylhexosaminidase) (hexosaminidase a). 5/2000 [MASS=63111]/Hexosaminidase B beta polypeptide, a subunit of a lysosomal enzyme that hydrolyzes the ganglioside GM2; mutations in the gene cause Sandhoff disease, a lysosomal storage disorder                                                                       |
| GP:AB019435_1 | P125                          | 43             | 3  | 1.17 | 0.10 | GP:AB019435_1 Homo sapiens mRNA for putative phospholipase, complete cds; putative. [MASS=111076]/Sec23-interacting protein p125, a proline rich protein containing a phospholipase motif, binds to the COPII vesicle coat protein Sec23p (mouse Sec23a), may play a role in protein transport between the endoplasmic reticulum and Golgi                                                                                                                       |
| GP:AF195951_1 | SRP68                         | 36             | 2  | 1.17 | 0.00 | GP:AF195951_1 Homo sapiens signal recognition particle 68 mRNA, complete cds; SRP68; subunit of signal recognition particle. [MASS=70242]/Signal recognition particle 68kD, a component of the signal recognition particle complex involved in targeting nascent proteins to the ER; corresponding gene maps to a tumor suppression locus associated with breast, esophageal, and ovarian cancers                                                                |
| GP:AB006572_1 | RMP                           | 29             | 1  | 1.17 | 0.00 | GP:AB006572_1 Homo sapiens RMP mRNA for RPB5 mediating protein, complete cds. [MASS=56764]/RPB5-mediating protein, binds to and negatively regulates the function of RNA polymerase II subunit 5 (POLR2E), inhibits transcriptional activation by hepatitis B virus X protein; marker for Reed Sternberg cells in Hodgkin disease                                                                                                                                |
| GP:U97276_1   | Q6                            | 7              | 1  | 1.17 | 0.00 | GP:U97276_1 Homo sapiens quiescin (Q6) mRNA, complete cds, alternatively spliced; alternatively spliced; probable sulfhydryl oxidase; thioredoxin superfamily member. [MASS=82578]/Quiescin Q6, a quiescence-inducible protein that contains 9 quiescin homology zones and has similarity to thioredoxins and <i>S. cerevisiae</i> Erv1p and sulfhydryl oxidases, may play a role in the induction of quiescence                                                 |
| SW:ODPA_HUMAN | PDHA1                         | 5              | 3  | 1.17 | 0.41 | SW:ODPA_HUMAN P08559 homo sapiens (human). pyruvate dehydrogenase e1 component alpha subunit, somatic form, mitochondrial precursor (ec 1.2.4.1) (pdhe1-a type i). 7/1999 [MASS=43296]/E1 alpha subunit of pyruvate dehydrogenase complex, somatic form, oxidatively decarboxylates pyruvate to acetyl-CoA; mutation of the corresponding gene causes the majority of pyruvate dehydrogenase deficiencies                                                        |
| SW:GNT2_HUMAN | MGAT2                         | 5, 34          | 1  | 1.16 | 0.00 | SW:GNT2_HUMAN Q10469 h alpha-1,6-mannosyl-glycoprotein beta-1,2-n- acetylglucosaminyltransferase (ec 2.4.1.143) (n-glycosyl- oligosaccharide-glycoprotein n-acetylglucosaminyltransferase ii) (beta-1,2-n- [MASS=51550]/UDP-N-acetylglucosamine: alpha-6-D-mannoside-beta-1,2- N-acetylglucosaminyltransferase II, catalyzes the conversion of oligomannose to complex N-glycans; activity is reduced or absent in type II congenital disorders of glycosylation |
| GP:AF039689_1 | STUB1                         | 32, 33         | 4  | 1.16 | 0.13 | GP:AF039689_1 Homo sapiens antigen NY-CO-7 (NY-CO-7) mRNA, complete cds; TPR domain protein. [MASS=34791]/STUB1                                                                                                                                                                                                                                                                                                                                                  |
| SW:RAB7_HUMAN | RAB7                          | 21, 43         | 1  | 1.16 | 0.00 | SW:RAB7_HUMAN P51149 homo sapiens (human). ras-related protein rab-7. 7/1998 [MASS=23490]/Ras-related GTP-binding protein 7, a member of the rab family of proteins that is involved in vesicle transport, membrane fusion, and vacuole formation; implicated in Chediak Higashi Syndrome                                                                                                                                                                        |
| SW:NPC1_HUMAN | NPC1                          | 19, 42         | 1  | 1.16 | 0.00 | SW:NPC1_HUMAN O15118 homo sapiens (human). niemann-pick c1 protein precursor. 5/2000 [MASS=142149]/Niemann-Pick disease type C1, a lysosomal sterol transporter involved in cholesterol metabolism; mutation of the corresponding gene causes Niemann-Pick type C1 disease and mutation of mouse Npc1 causes a disease like Niemann-Pick type C1 disease                                                                                                         |
| PIR2:JE0334   | RUVBL1                        | 16, 20, 29, 40 | 3  | 1.16 | 0.14 | PIR2:JE0334 nuclear matrix protein NMP 238 - human [MASS=50228]/RuvB like 1, a member of the TIP49 family of proteins, a nuclear protein which contains ATPase-helicase motifs, may interact with the transactivation domain of c-myc (MYC)                                                                                                                                                                                                                      |
| GP:AL451015_9 | unknown                       | 45             | 1  | 1.16 | 0.00 | GP:AL451015_9 Neurospora crassa DNA linkage group V BAC clone B13020; weak similarity to g-alpha interacting protein, homo sapiens, SWISSPROT:GAIP_HUMAN contains EST gb:AW708419, AW708418, AI330099, AI330098. [MASS=16236]                                                                                                                                                                                                                                    |

|                |                                                 |           |    |      |      |                                                                                                                                                                                                                                                                                                                                                                                                                                                                                                                |
|----------------|-------------------------------------------------|-----------|----|------|------|----------------------------------------------------------------------------------------------------------------------------------------------------------------------------------------------------------------------------------------------------------------------------------------------------------------------------------------------------------------------------------------------------------------------------------------------------------------------------------------------------------------|
| SW:IF2A_HUMAN  | EIF2S1                                          | 35        | 1  | 1.16 | 0.00 | SW:IF2A_HUMAN P05198 homo sapiens (human). eukaryotic translation initiation factor 2 alpha subunit (eif-2- alpha). 7/1999 [MASS=35981]/Eukaryotic translation initiation factor 2 subunit 1 (alpha subunit of eIF2), a translation initiation factor, involved in translational regulation, inhibited by phosphorylation                                                                                                                                                                                      |
| GP:AF308601_1  | NOTCH2                                          | 16        | 2  | 1.16 | 0.06 | GP:AF308601_1 Homo sapiens NOTCH 2 (N2) mRNA, complete cds. [MASS=265404]/Notch (Drosophila) homolog 2, a transcriptional co-activator of the Notch family of receptors, interacts with MAML1, functions in apoptosis induction and possibly in skeletal development, constitutive activation may contribute to neoplastic transformation                                                                                                                                                                      |
| SW:MCM3_HUMAN  | MCM3                                            | 15        | 1  | 1.16 | 0.00 | SW:MCM3_HUMAN P25205 homo sapiens (human). dna replication licensing factor mcm3 (dna polymerase alpha holoenzyme-associated protein p1) (rif beta subunit) (p102 protein) (p1-mcm3). 5/2000 [MASS=90952]/Minichromosome maintenance deficient 3, associates with the DNA polymerase alpha-primase complex, involved in the initiation of DNA replication, selectively degraded during apoptosis                                                                                                               |
| SW:DESP_HUMAN  | DSP                                             | 6, 11, 16 | 7  | 1.15 | 0.13 | SW:DESP_HUMAN P15924 homo sapiens (human). desmoplakin i and ii (dpi and dpii) (fragment). 5/2000 [MASS=201359]/Desmoplakin, a desmosomal plaque protein involved in cell adhesion and tumor migration, cleaved by caspases during desmosomal disruption associated with keratinocyte apoptosis; gene mutation is associated with hereditary palmoplantar keratoderma                                                                                                                                          |
| GPN:AF196479_1 | tRNA 2,2-dimethylguanosine-26 methyltransferase | 45        | 1  | 1.15 | 0.00 | SW:TRM1_HUMAN Q9nxh9 homo sapiens (human). probable n2,n2-dimethylguanosine trna methyltransferase (ec 2.1.1.32) (trna(guanine-26,n2-n2) methyltransferase) (trna 2,2- dimethylguanosine-26 methyltransfer [MASS=72234]                                                                                                                                                                                                                                                                                        |
| SW:COPP_HUMAN  | COPB2                                           | 43        | 5  | 1.15 | 0.22 | SW:COPP_HUMAN P35606 homo sapiens (human). coatomer beta' subunit (beta'-coat protein) (beta'-cop) (p102). 12/1998 [MASS=102356]/Coatomer protein (COP) complex subunit beta 2 (COP beta prime), part of a Golgi coatomer complex that comprises the coat of non-clathrin coated vesicles, likely to play a role in exocytosis                                                                                                                                                                                 |
| GP:AL096767_2  | SBF1                                            | 41        | 1  | 1.15 | 0.00 | GP:AL096767_2 Human DNA sequence from clone 579N16 on chromosome 22. Contains the 3' part of the gene for KIAA0685, the SBF1 gene for SET binding factor 1, a novel gene, ESTs, an STS, GSSs and three putative CpG islands, complete sequence; owing to approximately 7 [MASS=182476]/SET binding factor 1, a pseudo phosphatase that is inactive as a phosphatase and may act as a competitive inhibitor of other protein phosphatases, regulates cellular growth and may have a role in signal transduction |
| SW:NTC1_HUMAN  | NOTCH1                                          | 41        | 1  | 1.15 | 0.00 | SW:NTC1_HUMAN P46531 homo sapiens (human). neurogenic locus notch protein homolog 1 precursor (translocation-associated notch protein tan-1) (fragment). 2/1996 [MASS=260649]/Notch homolog 1, a transcriptional regulator involved in different types of cell proliferation and differentiation (especially blood cells), may play a role in cell cycle control; gene translocation is associated with T-cell leukemia                                                                                        |
| GP:AB015631_1  | TMEM4                                           | 45        | 10 | 1.14 | 0.17 | GP:AB015631_1 Homo sapiens mRNA for type II membrane protein, complete cds, clone:HP10390. [MASS=20652]/Transmembrane protein 4, a putative type II membrane protein                                                                                                                                                                                                                                                                                                                                           |
| GP:AB018270_1  | MYO1D                                           | 45        | 4  | 1.14 | 0.11 | GP:AB018270_1 Homo sapiens mRNA for KIAA0727 protein, partial cds. [MASS=78790]/Protein containing two IQ calmodulin-binding motifs and a myosin head (motor domain), has very strong similarity to a region of rat Myo1c, which is an unconventional Class I myosin heavy chain that binds calmodulin and may be involved in neurogenesis                                                                                                                                                                     |
| GP:AF155658_1  | HSPC117                                         | 45        | 5  | 1.14 | 0.27 | GP:AF155658_1 Homo sapiens putative 55 kDa protein mRNA, complete cds. [MASS=55003]/Member of the uncharacterized protein family UPF0027, has high similarity to uncharacterized C. elegans F16A11.2                                                                                                                                                                                                                                                                                                           |
| GP:AK001718_1  | FLJ10856                                        | 45        | 2  | 1.14 | 0.09 | GP:AK001718_1 Homo sapiens cDNA FLJ10856 fis, clone NT2RP4001547; unnamed protein product. [MASS=40684]/Protein with moderate similarity to S. cerevisiae Cdc50p, which is a protein that functions in cell cycle control, transcription regulation from the Pol II promoter, and is associated with a cell-division-cycle (CDC) phenotype when mutated                                                                                                                                                        |
| PIR2:T00345    | KIAA0590                                        | 45        | 1  | 1.14 | 0.00 | PIR2:T00345 hypothetical protein KIAA0590 - human [MASS=165197]/Protein containing two WD domains (WD-40 repeats), which may mediate protein-protein interactions, has low similarity to C. elegans CHE-11, which is required for normal ciliary development, dauer larva formation, and chemotaxis                                                                                                                                                                                                            |
| GPN:AB047847_1 | COPG2                                           | 43        | 5  | 1.14 | 0.06 | no_description_avail/Coatomer protein complex subunit gamma 2, putative intracellular transporter that may be involved in non-selective vesicle transport                                                                                                                                                                                                                                                                                                                                                      |
| SW:SR19_HUMAN  | SRP19                                           | 36        | 1  | 1.14 | 0.00 | SW:SR19_HUMAN P09132 homo sapiens (human). signal recognition particle 19 kda protein (srp19). 10/1996 [MASS=16156]/Signal recognition particle 19 kDa, a signal recognition particle subunit that binds to 7SL RNA and mediates SRP54 binding to the SRP RNA, may be involved in translocation of newly synthesized proteins across the membrane of the rough ER                                                                                                                                              |
| SW:FRAP_HUMAN  | FRAP1                                           | 7, 14, 40 | 1  | 1.13 | 0.00 | SW:FRAP_HUMAN P42345 homo sapiens (human). fkbp-rapamycin associated protein (frap) (rapamycin target protein). 7/1999 [MASS=288892]/FK506 binding protein 12- rapamycin associated protein 1, serine/threonine and 1-phosphatidylinositol 4-kinase, regulates translation, cell cycle and p53 (TP53) -dependent apoptosis; altered expression is associated with recurrent prostate tumors                                                                                                                    |
| SW:PHB_HUMAN   | PHB                                             | 45        | 1  | 1.13 | 0.00 | SW:PHB_HUMAN P35232 homo sapiens (human). prohibitin. 12/1998 [MASS=29804]/Prohibitin, mitochondrial suppressor of cell proliferation that binds to Rb family members RB1 , RBL1 , and RBL2 , represses E2F-induced transcription; gene is mutated in sporadic breast cancer and expression is elevated in endometrial adenocarcinoma                                                                                                                                                                          |
| SW:RS25_HUMAN  | RPS25                                           | 35        | 4  | 1.13 | 0.24 | SW:RS25_HUMAN P25111 homo sapiens (human), and rattus norvegicus (rat). 40s ribosomal protein s25. 10/1993 [MASS=13742]/Ribosomal protein S25, a putative RNA-binding component of the small 40S ribosomal subunit that may play a role in protein biosynthesis                                                                                                                                                                                                                                                |
| SW:PDI_HUMAN   | P4HB                                            | 34        | 3  | 1.13 | 0.01 | SW:PDI_HUMAN P07237 homo sapiens (human). protein disulfide isomerase precursor (pdi) (ec 5.3.4.1) (prolyl 4- hydroxylase beta subunit) (cellular thyroid hormone binding protein) (p55). 5/2000 [MASS=57116]/Procollagen-proline 2-oxoglutarate 4-dioxygenase (proline 4-hydroxylase) beta polypeptide (protein disulfide isomerase- thyroid hormone binding protein p55), acts as a protein folding catalyst and promotes protein solubility                                                                 |

|               |          |        |    |      |      |                                                                                                                                                                                                                                                                                                                                                                                                                                                                        |
|---------------|----------|--------|----|------|------|------------------------------------------------------------------------------------------------------------------------------------------------------------------------------------------------------------------------------------------------------------------------------------------------------------------------------------------------------------------------------------------------------------------------------------------------------------------------|
| SW:HYEP_HUMAN | EPHX1    | 26     | 6  | 1.13 | 0.03 | SW:HYEP_HUMAN P07099 homo sapiens (human). epoxide hydrolase (ec 3.3.2.3) (microsomal epoxide hydrolase) (epoxide hydratase). 10/1996 [MASS=52949]/Microsomal epoxide hydrolase, hydrates reactive epoxides to form dihydrodiols, detoxifies cytochrome p450-generated epoxides from the metabolism of xenobiotics; polymorphisms of the gene may affect risk of cancer, lung disease, and preeclampsia                                                                |
| SW:CBS_HUMAN  | CBS      | 2      | 1  | 1.13 | 0.00 | SW:CBS_HUMAN P35520 homo sapiens (human). cystathionine beta-synthase (ec 4.2.1.22) (serine sulfhydrase) (beta-thionase). 10/2001 [MASS=60455]/Cystathionine beta-synthase, catalyzes condensation of serine and homocysteine to form cystathionine, thereby removing toxic homocysteine; deficiency causes homocystinuria with associated vascular disease                                                                                                            |
| SW:NSF_HUMAN  | NSF      | 21, 43 | 6  | 1.12 | 0.16 | SW:NSF_HUMAN P46459 homo sapiens (human). vesicular-fusion protein nsf (n-ethylmaleimide-sensitive fusion protein) (nem-sensitive fusion protein). 12/1998 [MASS=82654]/N-ethylmaleimide-sensitive factor, an ATPase involved in membrane fusion during exocytosis                                                                                                                                                                                                     |
| SW:FLRE_HUMAN | BLVRB    | 18, 26 | 3  | 1.12 | 0.12 | SW:FLRE_HUMAN P30043 homo sapiens (human). flavin reductase (ec 1.6.99.1) (fr) (nadh-dependent diaphorase) (nadh-flavin reductase) (flr) (biliverdin reductase b) (ec 1.3.1.24) (bvr-b) (biliverdin-ix b [MASS=21988]/Biliverdin-IX beta reductase (NADPH-flavin reductase), catalyzes the conversion of biliverdin-IX beta to bilirubin-IX beta, the major heme catabolite produced during early fetal development; also has NAD(P)H-linked flavin reductase activity |
| PIR2:T50639   | GPSN2    | 45     | 5  | 1.12 | 0.09 | PIR2:T50639 synaptic glycoprotein SC2, spliced variant [imported] - human [MASS=36061]/Member of the 3-oxo-5-alpha-steroid 4-dehydrogenase family, which are involved in dihydrotestosterone biosynthesis                                                                                                                                                                                                                                                              |
| SW:ATHL_HUMAN | ATP12A   | 42     | 7  | 1.12 | 0.11 | SW:ATHL_HUMAN P54707 homo sapiens (human). potassium-transporting atpase alpha-like chain (ec 3.6.1.36) (proton pump) (non-gastric h+/k+ atpase alpha subunit). 5/2000 [MASS=115511]/Alpha subunit of non-gastric H,K ATPase, the catalytic subunit of the non-gastric nongastric hydrogen:potassium-exchanging ATPase, likely mediates Na+,K+ exchange, activity is pH dependent and sensitive to inhibition by ouabain and vanadate                                  |
| SW:143Z_HUMAN | YWHAZ    | 41     | 4  | 1.12 | 0.63 | SW:143Z_HUMAN P29312 homo sapiens (human), and bos taurus (bovine). 14-3-3 protein zeta/delta (protein kinase c inhibitor protein-1) (kqip-1) (factor activating coenzyme s) (fas). 7/1999 [MASS=27745]/14-3-3 zeta, mediates various signal transduction pathways, including inhibition of protein kinase C and activation of inositol polyphosphate 5-phosphatase, phospholipase A2 activity is questionable; may be associated with Alzheimer's disease             |
| SW:E2BE_HUMAN | EIF2B5   | 35     | 1  | 1.12 | 0.00 | SW:E2BE_HUMAN Q13144 homo sapiens (human). translation initiation factor eif-2b epsilon subunit (eif-2b gdp-gtp exchange factor) (fragment). 7/1999 [MASS=72237]/Translation initiation factor 2B subunit 5 (epsilon, 82kD), putative guanyl-nucleotide exchange factor component of the translation initiation factor 2B complex, predicted to mediate the exchange of GDP bound to translation initiation factor eIF2 for GTP                                        |
| SW:RL9_HUMAN  | RPL9     | 35     | 8  | 1.12 | 0.30 | SW:RL9_HUMAN P32969 homo sapiens (human). 60s ribosomal protein l9. 5/2000 [MASS=21863]/Ribosomal protein L9, putative component of the large 60S ribosomal subunit                                                                                                                                                                                                                                                                                                    |
| SW:RS5_HUMAN  | RPS5     | 35     | 19 | 1.12 | 0.89 | SW:RS5_HUMAN P46782 homo sapiens (human). 40s ribosomal protein s5. 5/2000 [MASS=22777]/Ribosomal protein S5, a component of the 40S ribosomal subunit; gene expression is altered in colorectal carcinoma cells                                                                                                                                                                                                                                                       |
| PIR2:G02520   | PLEC1    | 11     | 7  | 1.12 | 0.19 | PIR2:G02520 plectin - human [MASS=518488]/Plectin 1, a member of the plakin family that crosslinks the cytoskeleton and the plasma membrane in hemidesmosomes and focal contacts; mutation of the corresponding gene causes muscular dystrophy with epidermolysis bullosa simplex (MDEBS)                                                                                                                                                                              |
| SW:NPM_HUMAN  | NPM1     | 25, 37 | 3  | 1.11 | 0.14 | SW:NPM_HUMAN P06748 homo sapiens (human). nucleophosmin (npm) (nucleolar phosphoprotein b23) (numatrin) (nucleolar protein no38). 5/2000 [MASS=32575]/Nucleophosmin (numatrin), a nucleic acid-binding phosphoprotein involved in apoptosis, abundant in tumor cells; gene fusion with anaplastic lymphoma kinase (ALK) is detected in non-Hodgkin's lymphoma and fusion with MLL1 is seen in acute myeloid leukemia                                                   |
| SW:HBP_HUMAN  | HDLBP    | 19, 42 | 3  | 1.11 | 0.27 | SW:HBP_HUMAN Q00341 homo sapiens (human). high density lipoprotein binding protein (hdl-binding protein). 12/1998 [MASS=141440]/High density lipoprotein binding protein, binds and inhibits cleavage of the 3' UTR of vitellogenin mRNA, binds and promotes nuclear export of tRNA, binds high density lipoproteins and may have roles in cholesterol metabolism and atherogenesis                                                                                    |
| GP:AB040882_1 | KIAA1449 | 45     | 1  | 1.11 | 0.00 | GP:AB040882_1 Homo sapiens mRNA for KIAA1449 protein, partial cds; Start codon is not identified.. [MASS=68085]/Protein containing six WD domains (WD-40 repeats), which may mediate protein-protein interactions, has a region of low similarity to a region of platelet-activating factor acetylhydrolase isoform 1b alpha subunit (45kD) (human PAFAH1B1)                                                                                                           |
| GP:AF151069_1 | RPML2    | 45     | 4  | 1.11 | 0.04 | GP:AF151069_1 Homo sapiens HSPC235 mRNA, complete cds. [MASS=40152]/Mitochondrial ribosomal protein L37, putative component of the large subunit (39S) of the mitochondrial ribosome                                                                                                                                                                                                                                                                                   |
| GP:AF226045_1 | MRPS22   | 45     | 1  | 1.11 | 0.00 | GP:AF226045_1 Homo sapiens GK002 (GK002) mRNA, complete cds. [MASS=41280]/Mitochondrial ribosomal protein S22, a putative component of the mitochondrial small 28S ribosomal subunit                                                                                                                                                                                                                                                                                   |
| GP:D42085_1   | KIAA0095 | 45     | 1  | 1.11 | 0.00 | GP:D42085_1 Human mRNA for KIAA0095 gene, complete cds; KIAA0095 gene is related to S.cerevisiae NIC96 gene.. [MASS=93488]/Protein with low similarity to S. cerevisiae Nic96p, which is a nuclear pore protein (nucleoporin) that acts in a complex with S. cerevisiae Nsp1p, Nup57p, and Nup49p                                                                                                                                                                      |
| GP:AB011126_1 | FBP17    | 41     | 1  | 1.11 | 0.00 | GP:AB011126_1 Homo sapiens mRNA for KIAA0554 protein, partial cds. [MASS=77448]/Formin binding protein 17, contains a Src homology 3 (SH3) domain and a Fes/CIP4 homology domain, binds SNX2 and may mediate the assembly of protein signaling complexes; gene is a fusion partner with MLL in acute myelogenous leukemia                                                                                                                                              |
| GP:AF132939_1 | LOC51067 | 35     | 1  | 1.11 | 0.00 | GP:AF132939_1 Homo sapiens CGI-04 protein mRNA, complete cds. [MASS=53063]/Member of the class I tryptophanyl and tyrosyl (W and Y) tRNA synthetase family, has low similarity to tyrosyl-tRNA synthetase mitochondrial (S. cerevisiae Msy1p), which is involved in tyrosyl-tRNA aminoacylation                                                                                                                                                                        |

|                |        |           |    |      |      |                                                                                                                                                                                                                                                                                                                                                                                                                                                                             |
|----------------|--------|-----------|----|------|------|-----------------------------------------------------------------------------------------------------------------------------------------------------------------------------------------------------------------------------------------------------------------------------------------------------------------------------------------------------------------------------------------------------------------------------------------------------------------------------|
| SW:IF38_HUMAN  | EIF3S8 | 35        | 5  | 1.11 | 0.32 | SW:IF38_HUMAN Q99613 homo sapiens (human). eukaryotic translation initiation factor 3 subunit 8 (eif3 p110). 5/2000 [MASS=105344]/Translation initiation factor 3 subunit 8, 110 kDa eIF3 subunit that recruits translation initiation factor 1 (human SUI1) to 40S ribosomes, interacts with viral internal ribosome entry sites, and may be involved in seminoma development                                                                                              |
| SW:RL3_HUMAN   | RPL3   | 35        | 2  | 1.11 | 0.01 | SW:RL3_HUMAN P39023 homo sapiens (human). 60s ribosomal protein l3 (hiv-1 tar ma binding protein b) (tarbp-b). 5/2000 [MASS=45978]/Ribosomal protein L3, component of the large 60S ribosomal subunit; overexpressed in rapidly dividing cells                                                                                                                                                                                                                              |
| SW:TBA1_HUMAN  | TUBA1  | 11        | 36 | 1.11 | 0.28 | SW:TBA1_HUMAN P04687 homo sapiens (human). tubulin alpha-1 chain, brain-specific. 7/1999 [MASS=50158]/Alpha-tubulin, a member of a family of structural proteins that polymerize to form microtubules                                                                                                                                                                                                                                                                       |
| GP:U40572_1    | SNTB2  | 9         | 3  | 1.11 | 0.12 | GP:U40572_1 Human beta2-syntrophin (SNT B2) mRNA, complete cds; contains two pleckstrin homology domains and a domain related to both the tumor discs-large protein and the zonula occludens protein; dystrophin-binding intracellular membrane cytoskeletal protein. [MASS=57950]/Syntrophin beta 2, a membrane-associated protein that binds to dystrophin (DMD) and utrophin-dystrophin related protein (UTRN), may link proteins to the actin cytoskeleton              |
| PIR2:T14762    | ACE2   | 32, 34    | 1  | 1.10 | 0.00 | PIR2:T14762 hypothetical protein DKFZp434A014.1 - human (fragment) [MASS=92341]/Member of the angiotensin-converting enzyme family of dipeptidyl carboxypeptidases                                                                                                                                                                                                                                                                                                          |
| SW:UBPA_HUMAN  | USP10  | 32, 34    | 1  | 1.10 | 0.00 | SW:UBPA_HUMAN Q14694 homo sapiens (human). ubiquitin carboxyl-terminal hydrolase 10 (ec 3.1.2.15) (ubiquitin thiolesterase 10) (ubiquitin-specific processing protease 10) (deubiquitinating enzyme 10) (k [MASS=87134]/Ubiquitin specific protease 10, a member of the ubiquitin-specific cysteine (thiol) protease family, cleaves ubiquitin from ubiquitin-conjugated protein substrates, activity is inhibited upon association with Ras-GAP SH3 domain binding protein |
| SWN:UBPF_HUMAN | USP15  | 32, 34    | 3  | 1.10 | 0.11 | SWN:UBPF_HUMAN Q9y4e8 homo sapiens (human). ubiquitin carboxyl-terminal hydrolase 15 (ec 3.1.2.15) (ubiquitin thiolesterase 15) (ubiquitin-specific processing protease 15) (deubiquitinating enzyme 15) (f [MASS=108965]/Ubiquitin-specific protease 15, a member of the ubiquitin-specific cysteine (thiol) protease family, cleaves ubiquitin from ubiquitin-conjugated protein substrates, may play a role in growth regulation                                         |
| SW:SYI_HUMAN   | IARS   | 2, 35, 37 | 9  | 1.10 | 0.16 | SW:SYI_HUMAN P41252 homo sapiens (human). isoleucyl-trna synthetase, cytoplasmic (ec 6.1.1.5) (isoleucine-trna ligase) (ilers) (irs). 7/1999 [MASS=144959]/Isoleucine-tRNA synthetase, a class I aminoacyl tRNA synthetase, aminoacylates isoleucyl-tRNA with isoleucine for protein biosynthesis, acts as an autoantigen in some autoimmune diseases                                                                                                                       |
| GP:AB011163_1  | KIF1B  | 45        | 1  | 1.10 | 0.00 | GP:AB011163_1 Homo sapiens mRNA for KIAA0591 protein, partial cds. [MASS=151594]/Kinesin family member 1B, a putative motor protein involved in synaptic vesicle transport; mutation of the gene underlies Charcot-Marie-Tooth type 2A peripheral neuropathy                                                                                                                                                                                                                |
| GP:AF272357_1  | NPDC1  | 45        | 2  | 1.10 | 0.01 | GP:AF272357_1 Homo sapiens NPDC1-like protein (NPDC1) mRNA, complete cds; similar to mouse NPDC1. [MASS=34507]/Protein of unknown function, has a region of low similarity to a region of C. elegans CAB-1, which is a component of a neuronal transmission pathway that affects defecation and locomotion                                                                                                                                                                  |
| SW:KNLC_HUMAN  | KLC    | 45        | 1  | 1.10 | 0.00 | SW:KNLC_HUMAN Q07866 homo sapiens (human). kinesin light chain (klc). 10/1996 [MASS=64786]/Kinesin light chain, member of a family of microtubule-associated motor proteins that function in intracellular transport and mitosis; has very strong similarity to murine Klc1, which is abundantly expressed in the axons of sciatic nerve                                                                                                                                    |
| SW:AP50_HUMAN  | AP2M1  | 43        | 3  | 1.10 | 0.08 | SW:AP50_HUMAN P20172 homo sapiens clathrin coat assembly protein ap50 (clathrin coat associated protein ap50) (plasma membrane adaptor ap-2 50 kda protein) (ha2 50 kda subunit) (clathrin assembly protei [MASS=49655]/Medium chain subunit of the clathrin associated protein complex AP2, involved in vesicle transport, endocytosis, and required for V-ATPase complex activity                                                                                         |
| SW:ATCS_HUMAN  | ATP2B4 | 42        | 6  | 1.10 | 0.21 | SW:ATCS_HUMAN P23634 homo sapiens (human). calcium-transporting atpase plasma membrane, isoform 4 (ec 3.6.1.38) (calcium pump) (pmca4). 5/2000 [MASS=133931]/ATPase Ca++ transporting plasma membrane 4, a calcium pump that regulates levels of cytosolic free Ca2+, binds calmodulin                                                                                                                                                                                      |
| PIR1:JC5394    | DJ-1   | 41        | 7  | 1.10 | 0.32 | PIR1:JC5394 DJ-1 protein - human [MASS=19847]/RNA-binding protein regulatory subunit, a putative oncogene that may regulate the androgen receptor, play a role in RAS protein signal transduction, and is predicted to play a role in fertilization                                                                                                                                                                                                                         |
| SW:TF1B_HUMAN  | TIF1B  | 29        | 4  | 1.10 | 0.26 | SW:TF1B_HUMAN Q13263 homo sapiens (human). transcription intermediary factor 1-beta (nuclear corepressor kap-1) (krab-associated protein 1). 7/1999 [MASS=88550]/KRAB associated protein 1, a member of the transcriptional intermediary factor 1 (TIF1) gene family, acts as a transcriptional corepressor to silence heterochromatin, and as a co-activator in association with HP1-type chromodomain-containing proteins                                                 |
| SW:FAAH_HUMAN  | FAAH   | 19        | 3  | 1.10 | 0.22 | SW:FAAH_HUMAN O00519 homo sapiens (human). fatty-acid amide hydrolase (ec 3.1.-.-) (oleamide hydrolase). 5/2000 [MASS=63038]/Fatty acid amide hydrolase, degrades neuromodulatory fatty acid amides, including anandamide, predicted to have a role in a wide variety of physiologic effects such as voluntary movement, pain, sleep, and fertility, may have a role in Parkinson disease                                                                                   |
| SW:PP1A_HUMAN  | PPP1CA | 7, 23, 34 | 2  | 1.09 | 0.03 | SW:PP1A_HUMAN P08129 homo sapiens (human), mus musculus (mouse), rattus norvegicus (rat), and oryctolagus cuniculus (rabbit). serine/threonine protein phosphatase pp1-alpha 1 catalytic subunit (ec 3.1.3 [MASS=37512]/Protein phosphatase 1 catalytic subunit alpha isoform, plays roles in diverse cellular signal transduction processes that involve protein dephosphorylation, regulates of cell growth and apoptosis and may be a tumor suppressor                   |
| SW:KPY1_HUMAN  | PKM2   | 5, 18     | 19 | 1.09 | 0.24 | SW:KPY1_HUMAN P14618 homo sapiens (human). pyruvate kinase, m1 isozyme (ec 2.7.1.40) (pyruvate kinase muscle isozyme) (cytosolic thyroid hormone-binding protein) (ctbhp) (thbp1). 12/1998 [MASS=57747]/Pyruvate kinase muscle (pyruvate kinase 3), glycolytic enzyme that converts phosphoenolpyruvate to pyruvate with phosphorylation of ADP to ATP, exists as M1 and M2 alternative forms, may have roles in viral transformation and cell differentiation              |

|               |                 |                    |    |      |      |                                                                                                                                                                                                                                                                                                                                                                                                                                                                       |
|---------------|-----------------|--------------------|----|------|------|-----------------------------------------------------------------------------------------------------------------------------------------------------------------------------------------------------------------------------------------------------------------------------------------------------------------------------------------------------------------------------------------------------------------------------------------------------------------------|
| SW:CRTC_HUMAN | CALR            | 24, 29             | 21 | 1.09 | 0.26 | SW:CRTC_HUMAN P27797 homo sapiens (human). calreticulin precursor (crp55) (calregulin) (hacbp) (erp60) (52 kda ribonucleoprotein autoantigen ro/ss-a). 7/1998 [MASS=48142]/Calreticulin, an ER-resident Ca2+-binding protein and lectin-binding chaperone involved in protein folding. Ca2+ homeostasis, cell adhesion, and integrin signaling; anti-angiogenic fragment, vasostatin, is a potential anti-cancer agent                                                |
| GP:AF032922_1 | UNC-18C         | 21, 43             | 2  | 1.09 | 0.03 | GP:AF032922_1 Homo sapiens syntaxin 4 binding protein UNC-18c (UNC-18c) mRNA, complete cds. [MASS=67764]/Syntaxin binding protein 3, binds syntaxin 4 (STX4), predicted to be involved in vesicle transport and docking and in neurotransmitter release                                                                                                                                                                                                               |
| SW:STB2_HUMAN | STXBP2          | 21, 43             | 4  | 1.09 | 0.34 | SW:STB2_HUMAN Q15833 homo sapiens (human). syntaxin binding protein 2 (unc-18 homolog 2) (unc-18b). 5/2000 [MASS=66439]/Syntaxin-binding protein 2, a member of the Sec1 family of proteins involved in synaptic transmission and secretion, may be involved in intracellular vesicular transport                                                                                                                                                                     |
| SW:A4_HUMAN   | APP             | 10, 26, 41         | 5  | 1.09 | 0.19 | SW:A4_HUMAN P05067 homo sapiens (human). alzheimer's disease amyloid a4 protein precursor (protease nexin-ii) (pn-ii) (appi) [contains: beta-amyloid protein (beta-app) (a-beta)]. 5/2000 [MASS=86943]/Amyloid beta (A4) precursor protein, cell surface protease inhibitor that reduces copper, deposits of proteolytic peptide products are found in Alzheimer's disease and Down syndrome brains, deficiency is associated with early-onset Alzheimer's disease    |
| GP:AL049795_2 | LOC200081       | 45                 | 2  | 1.09 | 0.06 | GP:AL049795_2 Human DNA sequence from clone RP4-622L5 on chromosome 1p34.2-36.11. Contains the gene for importin alpha 7 (karyopherin), up to six novel genes and the 5' end of the EIF3S2 gene for eukaryotic translation initiation factor 3 beta. Contains ESTs, STSs [MASS=41648]                                                                                                                                                                                 |
| PIR2:T12544   | TBL2            | 45                 | 1  | 1.09 | 0.00 | SW:TBL2_HUMAN Q9y4p3 homo sapiens (human). transducin beta-like 2 protein (ws beta-transducin repeats protein) (ws-betatrp). 10/2001 [MASS=49798]/Protein containing five WD domains (WD-40 repeat), which may mediate protein-protein interactions, has weak similarity to human CIAO1, which interacts with and inhibits Wilms tumor suppressor protein (human WT1) transactivation activity                                                                        |
| GP:AF151858_1 | LOC50999        | 43                 | 2  | 1.09 | 0.01 | GP:AF151858_1 Homo sapiens CGI-100 protein mRNA, complete cds. [MASS=26005]/Protein with high similarity to T1-ST2 receptor binding protein (human IL1RL1LG), which binds to the T1/ST2 receptor (human IL1RL1), member of the emp24 family, which are involved in protein transport from endoplasmic reticulum to Golgi                                                                                                                                              |
| GP:AK022871_1 | TOLLIP          | 41                 | 4  | 1.09 | 0.03 | GP:AK022871_1 Homo sapiens cDNA FLJ12809 fis, clone NT2RP2002408, highly similar to Homo sapiens mRNA for TOLLIP protein; unnamed protein product. [MASS=22813]/Tollip, mediates interleukin-1 receptor signaling through interaction with serine/threonine kinase IRAK, inhibits the activity of IRAK1, inhibits lipopolysaccharide-induced activation of macrophages and TLR2 and TLR4 induced activation of NF-KB                                                  |
| SW:EF2_HUMAN  | EEF2            | 35                 | 39 | 1.09 | 0.20 | SW:EF2_HUMAN P13639 homo sapiens (human). elongation factor 2 (ef-2). 12/1998 [MASS=95338]/Translation elongation factor 2, member of the superfamily of GTP hydrolases, binds ribosomes, catalyzes the translocation step of peptide elongation in protein biosynthesis, target of ADP-ribosylation by diphtheria toxin and Pseudomonas exotoxin                                                                                                                     |
| SW:P4HA_HUMAN | P4HA1           | 34                 | 3  | 1.09 | 0.11 | SW:P4HA_HUMAN P13674 homo sapiens (human). prolyl 4-hydroxylase alpha subunit precursor (ec 1.14.11.2). 11/1997 [MASS=61049]/Proline 4-hydroxylase alpha polypeptide I, catalyzes the hydroxylation of proline to form 4-hydroxyproline in collagens in an oxygen-dependent manner, plays an essential role in collagen synthesis                                                                                                                                     |
| GP:AF203687_1 | PREB            | 29                 | 2  | 1.09 | 0.06 | SWN:PREB_HUMAN Q9hcu5 homo sapiens (human). prolactin regulatory element-binding protein. 3/2002 [MASS=45502]/Prolactin regulatory element binding protein, transcriptional activator, member of the WD-repeat protein family, may have a role in development; chromosomal location of the gene makes this a candidate for the gene mutated in partial trisomy 2p syndrome                                                                                            |
| GP:AF113123_1 | DCXR            | 5                  | 2  | 1.09 | 0.01 | GP:AF113123_1 Homo sapiens carbonyl reductase mRNA, complete cds; CR. [MASS=25913]/Protein with high similarity to murine Cbr2, carbonyl reductase, which is involved in differentiation of adipocytes from adipoblasts, member of the glucose/ribose dehydrogenase family                                                                                                                                                                                            |
| PIR2:T00363   | KIAA0674        | 33, 34             | 2  | 1.08 | 0.12 | PIR2:T00363 hypothetical protein KIAA0674 - human (fragment) [MASS=135179]/Member of the FKBP-type peptidyl-prolyl cis-trans isomerase family                                                                                                                                                                                                                                                                                                                         |
| PIR2:T47172   | CORO1C or CRNN4 | 23, 41             | 5  | 1.08 | 0.38 | PIR2:T47172 hypothetical protein DKFZp762H186.1 - human (fragment) [MASS=55769]/Coronin actin-binding protein 1C, a member of the coronin-like protein family, has five WD repeats and a coiled-coil motif, a putative actin binding protein that may play a role in mitosis, cytokinesis, cell motility, signal transduction, and phagocytosis                                                                                                                       |
| SW:CPT2_HUMAN | CPT2            | 18, 19, 42         | 1  | 1.08 | 0.00 | SW:CPT2_HUMAN P23786 homo sapiens (human). carnitine o-palmitoyltransferase ii, mitochondrial precursor (ec 2.3.1.21) (cpt ii). 5/2000 [MASS=73777]/Carnitine palmitoyltransferase II, a mitochondrial long-chain fatty acid oxidation enzyme; mutations are associated with a lipid metabolism disorder that includes recurrent myopathy with progressive rhabdomyolysis, muscle weakness and myoglobinuria                                                          |
| SW:RAC1_HUMAN | RAC1            | 10, 11, 16, 34, 41 | 18 | 1.08 | 0.53 | SW:RAC1_HUMAN P15154 homo sapiens (human), mus musculus (mouse), and canis familiaris (dog). ras-related c3 botulinum toxin substrate 1 (p21-rac1) (ras-like protein tc25). 12/1998 [MASS=21450]/Ras-related C3 botulinum toxin substrate 1, a monomeric GTPase of the Rho family, involved in transducing signals that regulate proliferation, apoptosis, cytoskeletal organization, and response to oxidative stress, contributes to tumor cell invasiveness        |
| PIR2:T46254   | RAGD            | 45                 | 2  | 1.08 | 0.07 | PIR2:T46254 hypothetical protein DKFZp761H171.1 - human [MASS=28611]/Protein with high similarity to S. cerevisiae Gtr2p, which is a putative small GTPase involved in nucleocytoplasmic transport                                                                                                                                                                                                                                                                    |
| SW:DSR3_HUMAN | DSCR3           | 45                 | 4  | 1.08 | 0.12 | SW:DSR3_HUMAN O14972 homo sapiens (human). down syndrome critical region protein 3. 5/2000 [MASS=33010]/Down syndrome critical region gene 3, a ubiquitously expressed protein; the corresponding gene is located in the Down syndrome critical region of chromosome 21                                                                                                                                                                                               |
| SW:SKP1_HUMAN | SKP1            | 45                 | 3  | 1.08 | 0.12 | SW:SKP1_HUMAN P34991 homo sapiens (human), and cavia porcellus (guinea pig). cyclin a/cdk2-associated protein p19 (rna polymerase ii elongation factor-like protein) (organ of corti protein 2) (ocp-ii pr [MASS=18527]/S-phase kinase-associated protein 1A (p19A), component of Cbf3 kinetochore and SCF (Skp1p-cullin-F-box) complexes which target many cell cycle dependent proteins for ubiquitin-dependent degradation, deregulation may lead to tumorigenesis |

|                |               |               |    |      |      |                                                                                                                                                                                                                                                                                                                                                                                                                                                                                     |
|----------------|---------------|---------------|----|------|------|-------------------------------------------------------------------------------------------------------------------------------------------------------------------------------------------------------------------------------------------------------------------------------------------------------------------------------------------------------------------------------------------------------------------------------------------------------------------------------------|
| SW:TBB1_HUMAN  | TUBB1         | 45            | 22 | 1.08 | 0.36 | SW:TBB1_HUMAN P07437 homo sapiens (human). tubulin beta-1 chain. 7/1999 [MASS=49759]/Protein with high similarity to beta-2 tubulin (rat Tubb2), which plays a role in the response to wounding and possibly in axonal outgrowth and regeneration, member of the tubulin-Ftza family, which are involved in polymer formation                                                                                                                                                       |
| SW:IF4G_HUMAN  | EIF4G1        | 35            | 2  | 1.08 | 0.39 | SW:IF4G_HUMAN Q04637 homo sapiens (human). eukaryotic translation initiation factor 4 gamma (eif-4-gamma) (eif-4g) (eif4g) (p220). 7/1999 [MASS=153361]/Eukaryotic translation initiation factor 4 gamma 1, gamma subunit of eIF4, functions in translation initiation, binds RNA and forms a bridge between the mRNA cap and polyA tail, cleaved during apoptosis and poliovirus infection                                                                                         |
| SW:OXYB_HUMAN  | OSBP          | 19            | 3  | 1.08 | 0.26 | SW:OXYB_HUMAN P22059 homo sapiens (human). oxysterol-binding protein. 11/1995 [MASS=89421]/Oxysterol binding protein, member of a family of intracellular lipid receptors, contains a pleckstrin domain and an oxysterol binding domain, binds oxysterols, may play a role in the regulation of cholesterol metabolism and oxysterol-induced cell death                                                                                                                             |
| SW:ERBB2_HUMAN | ERBB2         | 7, 16, 34, 41 | 5  | 1.07 | 0.09 | SW:ERBB2_HUMAN P04626 homo sapiens (human). receptor protein-tyrosine kinase erbB-2 precursor (ec 2.7.1.112) (p185erbB2) (neu proto-oncogene) (c-erbB-2) (tyrosine kinase-type cell surface receptor her2) [MASS=137910]/Avian erythroblastosis oncogene B 2, a receptor tyrosine kinase and most oncopotent member of the EGF receptor family, heterodimerizes with other EGFRs; overexpression contributes to growth, metastasis and chemoresistance of epithelial-derived tumors |
| SW:H XK1_HUMAN | HK1           | 5, 18         | 5  | 1.07 | 0.11 | SW:H XK1_HUMAN P19367 homo sapiens (human). hexokinase, type i (ec 2.7.1.1) (hk i) (brain form hexokinase). 12/1998 [MASS=102503]/Hexokinase Type I (ATP:D-hexose 6-phosphotransferase), catalyzes ATP-dependent conversion of glucose to glucose 6 phosphate in glycolysis, deficiency may lead to non-spherocytic hemolytic anemia                                                                                                                                                |
| SW:ARF6_HUMAN  | ARF6          | 11, 43        | 2  | 1.07 | 0.05 | SW:ARF6_HUMAN P26438 homo sapiens (human), mus musculus (mouse), and rattus norvegicus (rat). adp-ribosylation factor 6. 12/1998 [MASS=19951]/ADP-ribosylation factor 6, GTP-binding protein that stimulates cholera toxin activity and is involved in endocytosis, exocytosis, membrane trafficking, and possibly regulation of glucose transport                                                                                                                                  |
| GP:AK001243_1  | FLJ10381      | 45            | 1  | 1.07 | 0.00 | GP:AK001243_1 Homo sapiens cDNA FLJ10381 fis, clone NT2RM2002055; unnamed protein product. [MASS=49582]/Protein of unknown function                                                                                                                                                                                                                                                                                                                                                 |
| GPN:AB040462_1 | RTN4          | 45            | 1  | 1.07 | 0.00 | SWN:RTN4_HUMAN Q9nqc3 homo sapiens (human). reticulon 4 (neurite outgrowth inhibitor) (nogo protein) (foocen) (neuroendocrine-specific protein)(nsp) (neuroendocrine specific protein c homolog) (rtn-x) ( [MASS=129931]/Reticulon 4, ligand for RTN4R, inhibits axon regeneration in adult CNS but not PNS, yet peptide derivative NEP1-40 acts as an antagonist and promotes axonal regeneration and may have therapeutic potential                                               |
| PIR2:T46272    | DKFZP564L0864 | 45            | 1  | 1.07 | 0.00 | PIR2:T46272 hypothetical protein DKFZp564L0864.1 - human (fragment) [MASS=20191]/Protein with high similarity to uncharacterized mouse Hiat1                                                                                                                                                                                                                                                                                                                                        |
| SW:COPB_HUMAN  | COPB          | 43            | 1  | 1.07 | 0.00 | SW:COPB_HUMAN P53618 homo sapiens (human). coatomer beta subunit (beta-coat protein) (beta-cop) (fragment). 11/1997 [MASS=33444]/Coatomer protein beta, component of non-clathrin-coated vesicles essential for membrane trafficking, binds to HIV-1 Nef protein                                                                                                                                                                                                                    |
| SWN:SNX3_HUMAN | SNX3          | 43            | 1  | 1.07 | 0.00 | SWN:SNX3_HUMAN O60493 homo sapiens (human). sorting nexin 3 (sdp3 protein). 8/2001 [MASS=18762]/Sorting nexin 3, involved in intracellular protein trafficking                                                                                                                                                                                                                                                                                                                      |
| SW:RS8_HUMAN   | RPS8          | 35            | 9  | 1.07 | 0.56 | SW:RS8_HUMAN P09058 homo sapiens (human), rattus norvegicus (rat), and mus musculus (mouse). 40s ribosomal protein s8. 2/1996 [MASS=24074]/Ribosomal protein S8, component of the small 40S ribosomal subunit                                                                                                                                                                                                                                                                       |
| GP:AF260566_1  | HGS           | 41, 43        | 1  | 1.06 | 0.00 | GP:AF260566_1 Homo sapiens hepatocyte growth factor-regulated tyrosine kinase substrate HRS isoform 2 (HRS) mRNA, complete cds. [MASS=76362]/Hepatocyte growth factor regulated tyrosine kinase substrate, zinc-finger protein with ATPase activity, tyrosine phosphorylated upon growth factor stimulation, involved in endosome trafficking and mediates FOS transcription via cytokine signaling                                                                                 |
| SW:IMB2_HUMAN  | KPNB2         | 24, 36        | 1  | 1.06 | 0.00 | SW:IMB2_HUMAN Q92973 homo sapiens (human). importin beta-2 subunit (karyopherin beta-2 subunit) (transportin) (m9 region interaction protein) (mip). 5/2000 [MASS=101310]/Transportin (karyopherin beta 2), a component of the nuclear pore complex, mediates the import of HNRPA1 by binding the M9 nuclear localization sequence, also binds nuclear Ran GTP and nucleoporin Nup153; may mediate mRNA transport                                                                   |
| GP:AF126782_1  | RETSR1        | 19, 26        | 8  | 1.06 | 0.21 | GP:AF126782_1 Homo sapiens retinal short-chain dehydrogenase/reductase retSDR4 mRNA, complete cds. [MASS=32268]/Short-chain dehydrogenase-reductase 1, catalyzes the NADPH-dependent reduction of all-trans-retinal to retinol, may play a role in visual system phototransduction; the corresponding gene is deleted in many neuroblastoma cell lines with MYCN amplification                                                                                                      |
| SW:HEMZ_HUMAN  | FECH          | 18, 26        | 8  | 1.06 | 0.19 | SW:HEMZ_HUMAN P22830 homo sapiens (human). ferrochelatase precursor (ec 4.99.1.1) (protoheme ferro-lyase) (heme synthetase). 12/1998 [MASS=47834]/Ferrochelatase (protoheme ferrochelatase), catalyzes the final step in the heme biosynthetic pathway by inserting ferrous iron into protoporphyrin IX to form heme; reduced activity and mutations in the corresponding gene are associated with protoporphyria                                                                   |
| GP:AC005154_1  | MGC3077       | 45            | 2  | 1.06 | 0.00 | GP:AC005154_1/Protein of unknown function, has moderate similarity to uncharacterized C. elegans C44B7.7                                                                                                                                                                                                                                                                                                                                                                            |
| GP:AF137372_1  | RAB18         | 45            | 2  | 1.06 | 0.01 | GP:AF137372_1 Homo sapiens ras-related protein RAB18 mRNA, complete cds. MASS=22977/Ras-related GTP-binding protein 18, putative GTP binding protein and GTPase, may be involved in vesicle transport and may play a role in inflammation                                                                                                                                                                                                                                           |
| GP:X87832_1    | PLXNA1        | 45            | 1  | 1.06 | 0.00 | GP:X87832_1 Homo sapiens mRNA for partial NOV/plexin-A1 protein. [MASS=194818]/Plexin A1, acts as a coreceptor with neuropilin (NRP1) for semaphorins, which are signaling molecules controlling cell repulsion                                                                                                                                                                                                                                                                     |
| SW:ANXA_HUMAN  | ANXA10        | 45            | 8  | 1.06 | 0.12 | SW:ANXA_HUMAN P50995 homo sapiens (human). annexin xi (calyculin-associated annexin 50) (cap-50) (56 kda autoantigen). 5/2000 [MASS=54390]/Annexin A10, a liver-specific member of the annexin family of calcium-dependent phospholipid-binding proteins that typically have a role in inositol phosphate metabolism; downregulation correlates with high grade and high stage hepatocellular carcinoma                                                                             |

|                |                              |        |    |      |      |                                                                                                                                                                                                                                                                                                                                                                                                                                                              |
|----------------|------------------------------|--------|----|------|------|--------------------------------------------------------------------------------------------------------------------------------------------------------------------------------------------------------------------------------------------------------------------------------------------------------------------------------------------------------------------------------------------------------------------------------------------------------------|
| SW:YCE7_HUMAN  | Hypothetical protein CGI-147 | 45     | 1  | 1.06 | 0.00 | SW:YCE7_HUMAN Q9y3e5 homo sapiens (human). hypothetical protein cgi-147. 5/2000 [MASS=19194]                                                                                                                                                                                                                                                                                                                                                                 |
| PIR2:I53171    | H-SP1                        | 43     | 1  | 1.06 | 0.00 | PIR2:I53171 pantophysin - human [MASS=28565]/Synaptophysin-like protein (pantophysin), a protein that has similarity to the synaptic vesicle protein synaptophysin (SYP), may play a role in vesicle transport                                                                                                                                                                                                                                               |
| SW:FASA_HUMAN  | TNFSF6                       | 41     | 1  | 1.06 | 0.00 | SW:FASA_HUMAN P25445 homo sapiens (human). fasl receptor precursor (apoptosis-mediating surface antigen fas) (apo-1 antigen) (cd95 antigen). 11/1997 [MASS=37732]/Apoptosis antigen ligand 1, a tumor necrosis factor alpha related cytokine that binds Fas and induces apoptosis, plays important roles in immune system development, immune response and tumorigenesis, may be a prognostic tumor marker                                                   |
| SW:FK38_HUMAN  | FKBP8                        | 41     | 3  | 1.06 | 0.31 | SW:FK38_HUMAN Q14318 homo sapiens (human). 38 kda fk-506 binding protein homolog (fkbp38). 5/2000 [MASS=38408]/FK506 binding protein, member of a subclass of immunophilins, contains tetratricopeptide repeat and a consensus leucine zipper domains                                                                                                                                                                                                        |
| SW:PSD4_HUMAN  | PSMD4                        | 32     | 5  | 1.06 | 0.29 | SW:PSD4_HUMAN P55036 homo sapiens (human). 26s proteasome regulatory subunit s5a (multiubiquitin chain binding protein) (antiseecretory factor-1) (af) (asf). 12/1998 [MASS=40737]/Proteasome 26S subunit non ATPase 4, an antiseecretory factor that is a subunit of the 26S proteasome and may bind to multiubiquitinated proteins; inhibits intestinal fluid secretion induced by cholera toxin                                                           |
| SWN:PSA7_HUMAN | PSMA7                        | 32     | 4  | 1.06 | 0.22 | SWN:PSA7_HUMAN O14818 homo sapiens (human). proteasome subunit alpha type 7 (ec 3.4.99.46) (proteasome subunit rc6-1) (proteasome subunit xapc7). 8/2001 [MASS=27887]/Proteasome (prosome, macropain) subunit (alpha type) 7, a subunit of the 20S core proteasome, a target of hepatitis B virus X protein; may be involved in pathogenesis of pancreatic cancer                                                                                            |
| SW:ODPB_HUMAN  | PDHB                         | 5, 18  | 1  | 1.05 | 0.00 | SW:ODPB_HUMAN P11177 homo sapiens (human). pyruvate dehydrogenase e1 component beta subunit, mitochondrial precursor (ec 1.2.4.1) (pdhe1-b). 7/1999 [MASS=39219]/E1 beta subunit of pyruvate dehydrogenase complex, oxidatively decarboxylates pyruvate to acetyl-CoA                                                                                                                                                                                        |
| SW:PTN1_HUMAN  | PTPN1                        | 34, 41 | 3  | 1.05 | 0.15 | SW:PTN1_HUMAN P18031 homo sapiens (human). protein-tyrosine phosphatase 1b (ec 3.1.3.48) (ptp-1b). 7/1999 [MASS=49967]/Protein tyrosine phosphatase non-receptor type I, likely involved in the negative regulation of insulin receptor signaling, may be associated with type II diabetes and obesity                                                                                                                                                       |
| GP:AJ245621_1  | CTL2                         | 45     | 17 | 1.05 | 0.27 | GP:AJ245621_1 Homo sapiens CTL2 gene. [MASS=80138]/Protein of unknown function, has high similarity to uncharacterized mouse 2210409B01Rik                                                                                                                                                                                                                                                                                                                   |
| GP:Z74021_1    | RPS17L4                      | 45     | 7  | 1.05 | 0.21 | GP:Z74021_1 Human DNA sequence from clone SC22CB-1E7 on chromosome 22 Contains the RPS17L4 gene for Ribosomal protein S17-like 4, exons 1 and 2 of the SLC5A1 gene for solute carrier family 5 (sodium/glucose cotransporter) member 1 (High Affinity Sodium-Glucose C [MASS=15602]                                                                                                                                                                          |
| GPN:AF060511_1 | LOC112473                    | 45     | 1  | 1.05 | 0.00 | GPN:AF060511_1 Homo sapiens clone 016b10 My016 protein mRNA, complete cds.[MASS=10117]                                                                                                                                                                                                                                                                                                                                                                       |
| PIR2:PH0268    | EPPK1                        | 45     | 3  | 1.05 | 0.01 | PIR2:PH0268 epidermal autoantigen 450K (clone pE450-C/D) - human (fragment) [MASS=73263]/Epiplakin 1, a member of the plakin family of proteins that bind to cytoplasmic intermediate filaments; autoantigens to the protein are present in patients with a subepidermal blistering disease that resembles bullous pemphigoid                                                                                                                                |
| GP:U81006_1    | TM9SF2                       | 42     | 3  | 1.05 | 0.06 | GP:U81006_1 Human p76 mRNA, complete cds; predicted molecular weight is 76kD; contains nine potential membrane spanning domains; similar to yeast p24a precursor protein encoded by GenBank Accession Number X67316. [MASS=75776]/Transmembrane 9 superfamily member 2, an endosomal protein with membrane spanning domains, may be a channel or transporter of small molecules                                                                              |
| SW:EF1G_HUMAN  | EEF1G                        | 35     | 7  | 1.05 | 0.15 | SW:EF1G_HUMAN P26641 homo sapiens (human). elongation factor 1-gamma (ef-1-gamma). 5/2000 [MASS=50119]/Eukaryotic elongation factor 1 gamma, a likely translation elongation factor 1 (EF-1) complex component that binds cytoplasmic cysteinyl-tRNA synthetase and possibly EF-1 beta; overexpression in gastric carcinoma correlates with vascular permeation                                                                                              |
| GP:D88435_1    | GAK                          | 7      | 2  | 1.05 | 0.04 | GP:D88435_1 Homo sapiens mRNA for HsGAK, complete cds. [MASS=143165]/Cyclin G-associated kinase, a putative serine/threonine protein kinase that shares homology with tensin and auxilin, may play a role in cell cycle regulation                                                                                                                                                                                                                           |
| SW:KCCD_HUMAN  | CAMK2D                       | 34, 41 | 3  | 1.04 | 0.01 | SW:KCCD_HUMAN Q13557 homo sapiens (human). calcium/calmodulin-dependent protein kinase type ii delta chain (cam-kinase ii delta chain) (ec 2.7.1.123) (camk-ii, delta subunit) (fragment). 5/2000 [MASS=12846]/Calcium/calmodulin-dependent protein kinase II delta, member of the multifunctional CAMKII family involved in Ca2+ regulated processes; alternative form delta 3 is specifically upregulated in the myocardium of patients with heart failure |
| SW:KRCB_HUMAN  | AKT2                         | 34, 41 | 1  | 1.04 | 0.00 | SW:KRCB_HUMAN P31751 homo sapiens (human). rac-beta serine/threonine kinase (ec 2.7.1.-) (rac-pk-beta) (akt2 kinase). 11/1995 [MASS=55769]/v-akt murine thymoma viral oncogene homolog 2, protein kinase that is activated by mitogens and survival factors, may regulate cell proliferation and apoptosis, overexpression is associated with ovarian, breast and pancreatic cancers                                                                         |
| GP:AB002310_1  | UREB1                        | 32, 34 | 3  | 1.04 | 0.06 | GP:AB002310_1 Human mRNA for KIAA0312 gene, partial cds. [MASS=209315]/Protein containing a HECT domain, which may confer ubiquitin-protein ligase activity, has high similarity to a region of S. cerevisiae Tom1p, which is a protein required for the G2/M transition                                                                                                                                                                                     |
| SW:KAP2_HUMAN  | PRKAR2A                      | 16, 41 | 2  | 1.04 | 0.57 | SW:KAP2_HUMAN P13861 homo sapiens (human). camp-dependent protein kinase type ii-alpha regulatory chain. 5/2000 [MASS=45387]/cAMP-dependent Protein kinase A regulatory subunit alpha (type II), binds A-kinase anchoring proteins to mediate holoenzyme localization and plays important roles in sperm motility and in trophoblast cell differentiation                                                                                                    |



|               |                  |            |    |      |      |                                                                                                                                                                                                                                                                                                                                                                                                                                                                                         |
|---------------|------------------|------------|----|------|------|-----------------------------------------------------------------------------------------------------------------------------------------------------------------------------------------------------------------------------------------------------------------------------------------------------------------------------------------------------------------------------------------------------------------------------------------------------------------------------------------|
| GP:AK025520_1 | GOCAP1           | 45         | 3  | 1.04 | 0.22 | GP:AK025520_1 Homo sapiens cDNA: FLJ21867 fis, clone HEP02419; unnamed protein product. [MASS=60579]/Protein with strong similarity to peripheral benzodiazepine receptor associated protein 7 (mouse Pap7), which binds peripheral-type benzodiazepine receptor (Bzrp) and functions in regulation of steroidogenesis, contains an acyl CoA binding domain                                                                                                                             |
| PIR2:T46333   | macrothioredoxin | 45         | 1  | 1.04 | 0.00 | PIR2:T46333 hypothetical protein DKFZp434J1813.1 - human (fragment) [MASS=53778]                                                                                                                                                                                                                                                                                                                                                                                                        |
| SW:LEGU_HUMAN | LGMN             | 45         | 8  | 1.04 | 0.16 | SW:LEGU_HUMAN Q99538 homo sapiens (human). legumin precursor (ec 3.4.22.34) (asparaginyl endopeptidase), 12/1998 [MASS=49411]/Protease cysteine 1 (legumain), a lysosomal cysteine endopeptidase that hydrolyzes asparaginyl bonds, inhibits osteoclast differentiation, may play a role in antigen processing for MHC class II presentation                                                                                                                                            |
| GP:AC006378_1 | BET1             | 43         | 1  | 1.04 | 0.00 | GP:AC006378_1 Homo sapiens BAC clone RP11-45519 from 7q21.2-q22, complete sequence; match to AAB62941.1 (PID:2253426); H_NH0455109.1. [MASS=13289]/S. cerevisiae Bet1 homolog, may be involved in ER to Golgi transport                                                                                                                                                                                                                                                                 |
| SW:ATN1_HUMAN | ATP1A1           | 42         | 54 | 1.04 | 0.22 | SW:ATN1_HUMAN P05023 homo sapiens (human). sodium/potassium-transporting atpase alpha-1 chain precursor (ec 3.6.1.37) (sodium pump) (na+/k+ atpase). 7/1999 [MASS=112896]/Alpha 1 subunit of the Na+-K+-transporting ATPase, required for active transport of sodium in the kidney and other tissues, may function in blood pressure regulation; mutations may be associated with essential hypertension and diabetic neuropathy                                                        |
| GP:AF077032_1 | FLJ10578         | 36         | 5  | 1.04 | 0.27 | GP:AF077032_1 Homo sapiens sec61 homolog mRNA, complete cds. [MASS=52480]/Sec61 alpha form 2, a protein with high similarity to S. cerevisiae Sec61p, which is a component of the Sec61p-Sss1p-Sbh1p complex involved in protein translocation into the endoplasmic reticulum, member of the SecY protein family of protein translocators                                                                                                                                               |
| PIR2:S52920   | ADAM10           | 34         | 9  | 1.04 | 0.18 | PIR2:S52920 disintegrin (EC 3.4.24.-) - human (fragment) [MASS=54380]/A disintegrin and metalloproteinase domain 10, an ADAM family disintegrin domain-containing zinc metalloprotease, acts in ectodomain proteolysis of membrane proteins, cleaves cellular prion protein (PRNP), acts as an alpha secretase on APP                                                                                                                                                                   |
| SW:CYPH_HUMAN | PPIA             | 33         | 15 | 1.04 | 0.29 | SW:CYPH_HUMAN P05092 homo sapiens (human), cercopithecus aethiops (green monkey) (grivet), macaca mulatta (rhesus macaque), and papio anubis peptidyl-prolyl cis-trans isomerase a (ec 5.2.1.8) (ppiase) ( [MASS=17881]/Peptidylprolyl isomerase A (cyclophilin A), mediates immunosuppressant action of cyclosporin A by inhibiting calcineurin phosphatase activity, has nuclease activity, binds to transcription factors, incorporates into HIV-1 virions and regulates infectivity |
| GP:AB002387_1 | MYO6             | 11         | 34 | 1.04 | 0.35 | GP:AB002387_1 Human mRNA for KIAA0389 gene, complete cds. [MASS=148714]/Myosin VI, an unconventional myosin motor protein, may function in membrane trafficking in the secretory and endocytic pathways; mutations in the corresponding gene are associated with deafness                                                                                                                                                                                                               |
| GP:AF020797_1 | HSMU1B           | 36, 43     | 1  | 1.03 | 0.00 | GP:AF020797_1 Homo sapiens AP-mu chain family member mu1B (HSMU1B) mRNA, complete cds. [MASS=48108]/Adaptor-related protein complex 1 mu 2 subunit, involved in protein sorting                                                                                                                                                                                                                                                                                                         |
| SW:MPRD_HUMAN | M6PR             | 36, 43     | 1  | 1.03 | 0.00 | SW:MPRD_HUMAN P20645 homo sapiens (human). cation-dependent mannose-6-phosphate receptor precursor (cd man-6-p receptor) (cd-mpr) (46 kda mannose 6-phosphate receptor) (mpr 46). 5/2000 [MASS=30993]/Cation-dependent mannose-6-phosphate receptor, involved in intracellular sorting and transport of acid hydrolases, transports lysosomal enzymes                                                                                                                                   |
| PIR2:A57017   | ABCE1            | 25, 39     | 5  | 1.03 | 0.03 | PIR2:A57017 RNase L inhibitor - human [MASS=67559]/Ribonuclease L inhibitor, inhibits the nuclease activity and 2-5A binding ability of RNase L, may be induced by HIV-1 to inhibit the 2-5A/RNase L pathway, can inhibit the antiviral activity of interferon when overexpressed                                                                                                                                                                                                       |
| GP:AK002163_1 | FLJ11301         | 45         | 1  | 1.03 | 0.00 | GP:AK002163_1 Homo sapiens cDNA FLJ11301 fis, clone PLACE1009908, weakly similar to HYPOTHETICAL GTP-BINDING PROTEIN IN SEH1-PRP20 INTERGENIC REGION; unnamed protein product. [MASS=73142]/Member of an uncharacterized GTPase family, has moderate similarity to yeast YGL099W, which is required for normal growth, morphology, mating, and sporulation                                                                                                                              |
| PIR2:T00050   | DDEF2            | 45         | 1  | 1.03 | 0.00 | PIR2:T00050 hypothetical protein KIAA0400 - human [MASS=111651]/Development and differentiation enhancing factor 2 (Pyk2 C terminus-associated protein), phosphatidylinositol-4,5-bisphosphate-dependent ARF GTPase activator, binds Src kinases and PYK2 (PTK2B), inhibits paxillin (PXN) recruitment to focal adhesions                                                                                                                                                               |
| SW:ACTY_HUMAN | ACTR1B           | 45         | 1  | 1.03 | 0.00 | SW:ACTY_HUMAN P42025 homo sapiens (human). beta-centractin. 7/1999 [MASS=42293]/Beta contractin, a member of the contractin family of actin-related proteins, a subunit of the dynactin complex which functions in the cytoplasmic dynein-driven organelle movement along microtubules                                                                                                                                                                                                  |
| GP:AF288687_1 | CGI-152          | 42         | 3  | 1.03 | 0.07 | GP:AF288687_1 Homo sapiens CGI-152 protein mRNA, complete cds. [MASS=121110]/Member of the haloacid dehalogenase or epoxide hydrolase family and the E1-E2 (P-type) ATPase family, which are cation transporters, has moderate similarity to S. cerevisiae Spf1p, which functions in cell wall organization and xenobiotic response                                                                                                                                                     |
| SW:CLC3_HUMAN | CLCN3            | 42         | 1  | 1.03 | 0.00 | SW:CLC3_HUMAN P51790 homo sapiens (human). chloride channel protein 3 (clc-3). 7/1998 [MASS=84793]/Chloride channel 3, chloride channel of the voltage-gated family, plays a role in chloride transport, may be responsible for outwardly rectifying chloride currents, regulated by calcium/calmodulin dependent protein kinase II (CAMK2A), binds to SLC9A3R1                                                                                                                         |
| PIR2:G02390   | MDC15            | 6          | 6  | 1.03 | 0.12 | PIR2:G02390 disintegrin-like metalloproteinase MDC15 (EC 3.4.24.-) - human [MASS=87719]/Metargidin, member of the ADAM family of disintegrin domain-containing zinc metalloproteases, interacts specifically with the alphavbeta3 integrin, upregulated in atherosclerotic lesions and increased expression occurs during atrial fibrillation                                                                                                                                           |
| GP:AJ131612_1 | Slc25a10         | 5, 18, 42  | 1  | 1.02 | 0.00 | GP:AJ131612_1 Homo sapiens dic gene, exons 1-11. [MASS=31325]/Solute carrier family 25 member 10 (dicarboxylate carrier), a putative dicarboxylic acid transporter predicted to reside in the inner mitochondrial membrane, may be involved in gluconeogenesis                                                                                                                                                                                                                          |
| GP:AF132941_1 | LOC51068         | 25, 35, 39 | 1  | 1.02 | 0.00 | GP:AF132941_1 Homo sapiens CGI-07 protein mRNA, complete cds. [MASS=57585]/Protein with moderate similarity to S. cerevisiae Nmd3p, which is a protein involved in the nuclear export of 60S ribosomal subunits                                                                                                                                                                                                                                                                         |

|                 |              |            |    |      |      |                                                                                                                                                                                                                                                                                                                                                                                                                                        |
|-----------------|--------------|------------|----|------|------|----------------------------------------------------------------------------------------------------------------------------------------------------------------------------------------------------------------------------------------------------------------------------------------------------------------------------------------------------------------------------------------------------------------------------------------|
| GP:AB037819_1   | RRBP1        | 16, 35, 36 | 7  | 1.02 | 0.13 | GP:AB037819_1 Homo sapiens mRNA for KIAA1398 protein, partial cds; Start codon is not identified.. [MASS=170212]/Ribosome binding protein 1, a putative ribosome receptor, may play a role in protein biosynthesis, appears to be involved in cardiac development, may play a role in cardiac remodeling in heart failure                                                                                                              |
| SW:TDX1_HUMAN   | PRDX1        | 10, 16     | 2  | 1.02 | 0.01 | SW:TDX1_HUMAN P32119 homo sapiens (human). thioredoxin peroxidase 1 (thioredoxin-dependent peroxide reductase 1) (thiol-specific antioxidant protein) (tsa) (prp) (natural killer cell enhancing factor b) [MASS=21892]/Peroxiredoxin 1, oxidative stress-inducible antioxidant protein with peroxidase activity, may have anticytotoxic and antiapoptotic activity and may have a role in cell proliferation                          |
| GP:AF129332_1   | MUM2         | 45         | 1  | 1.02 | 0.00 | GP:AF129332_1 Homo sapiens MUM2 (MUM2) gene, complete cds; similar to Saccharomyces cerevisiae bet5. [MASS=16832]/Protein with low similarity to S. cerevisiae Bet5p, which is a subunit of both the Transport Protein Particle I complex involved in vesicular transport from endoplasmic reticulum to Golgi and the Transport Protein Particle II involved in Golgi trafficking                                                      |
| GP:AK022763_1   | MRPL44       | 45         | 2  | 1.02 | 0.20 | GP:BC012058_1 Homo sapiens, hypothetical protein FLJ12701, clone MGC:19885 IMAGE:4554033, mRNA, complete cds. [MASS=37535]/Protein containing a double-stranded RNA binding domain                                                                                                                                                                                                                                                     |
| GPN:AL109804_12 | KIAA1271     | 45         | 2  | 1.02 | 0.27 | GP:AB033097_1 Homo sapiens mRNA for KIAA1271 protein, partial cds; Start codon is not identified.. [MASS=56670]/Protein of unknown function                                                                                                                                                                                                                                                                                            |
| PIR2:T17237     | DKFZP434P106 | 45         | 1  | 1.02 | 0.00 | PIR2:T17237 hypothetical protein DKFZp434P106.1 - human (fragment) [MASS=28268]/Protein of unknown function, has high similarity to uncharacterized mouse 6330583M11Rik                                                                                                                                                                                                                                                                |
| SW:ANX6_HUMAN   | ANXA6        | 45         | 3  | 1.02 | 0.02 | SW:ANX6_HUMAN P08133 homo sapiens (human). annexin vi (lipocortin vi) (p68) (p70) (protein iii) (chromobindin 20) (67 kda calelectrin) (calphobindin-ii) (cpb-ii). 5/2000 [MASS=75742]/Annexin VI, member of the annexin family of calcium-dependent phospholipid binding proteins that shift between soluble and membrane associated states; involved in the budding of clathrin coated pits and may play a role in tumor suppression |
| SW:DOPD_HUMAN   | DDT          | 26         | 1  | 1.02 | 0.00 | SW:DOPD_HUMAN P30046 homo sapiens (human). d-dopachrome tautomerase (phenylpyruvate tautomerase ii). 5/2000 [MASS=12581]/D-dopachrome tautomerase, a tyrosinase-related zinc metalloenzyme that catalyzes the conversion of D-dopachrome to 5,6-dihydroxyindole in the melanin biosynthetic pathway, specifically expressed in melanin-producing cells, and is a melanoma tumor antigen                                                |
| SW:SPCN_HUMAN   | SPTAN1       | 11         | 2  | 1.02 | 0.35 | SW:SPCN_HUMAN Q13813 homo sapiens (human). spectrin alpha chain, brain (spectrin, non-erythroid alpha chain) (fodrin alpha chain) (sptan1). 11/1997 [MASS=284282]/Non-erythroid alpha-spectrin 1 (alpha-fodrin), a member of a family of actin crosslinking proteins of the membrane-associated cytoskeleton, binds calcium, cleaved during apoptosis, acts as an autoantigen in the development of Sjogren syndrome                   |
| SW:TCPD_HUMAN   | CCT4         | 7, 29, 33  | 4  | 1.01 | 0.17 | SW:TCPD_HUMAN P50991 homo sapiens (human). t-complex protein 1, delta subunit (tcp-1-delta) (cct-delta) (stimulator of tar rna binding). 5/2000 [MASS=57839]/Chaperonin containing T-complex 1 subunit 4 (delta), part of a cytosolic hexadecamer structure involved in ATP-dependent folding of actin, tubulin and other proteins                                                                                                     |
| SW:ENOA_HUMAN   | ENO1         | 5, 18, 29  | 3  | 1.01 | 0.08 | SW:ENOA_HUMAN P06733 homo sapiens (human). alpha enolase (ec 4.2.1.11) (2-phospho-d-glycerate hydro-lyase) (non-neural enolase) (nne) (phosphopyruvate hydratase). 7/1998 [MASS=47038]/Enolase 1 (alpha enolase), converts 2-phospho-D-glycerate to phosphoenolpyruvate in glycolysis, an autoantigen in multiple autoimmune diseases, shorter alternative form c-myc promoter binding protein (MPB1) is a transcriptional repressor   |
| GP:U41806_1     | SQSTM1       | 32, 41     | 4  | 1.01 | 0.21 | GP:U41806_1 Human EBI3-associated protein p60 mRNA, complete cds; EBI3-associated protein. [MASS=47602]/Sequestosome 1 (ubiquitin-binding protein p62), a ubiquitin-binding protein with a zinc finger-like motif, a G protein-binding region and a PEST motif, interacts with several signal transduction pathways, may be involved in endosome to lysosome transport                                                                 |
| SW:RINI_HUMAN   | RNH          | 25, 39     | 1  | 1.01 | 0.00 | SW:RINI_HUMAN P13489 homo sapiens (human). placental ribonuclease inhibitor (ribonuclease/angiogenin inhibitor) (rai) (ri). 12/1998 [MASS=49842]/Ribonuclease and angiogenin inhibitor, tightly binds and inhibits alkaline and neutral ribonucleases and angiogenin, functions in mRNA degradation and inhibition of HT-29 human colon adenocarcinoma cell binding to angiogenin (ANG)                                                |
| SW:SYK_HUMAN    | KARS         | 2, 35, 37  | 7  | 1.01 | 0.18 | SW:SYK_HUMAN Q15046 homo sapiens (human). lysyl-trna synthetase (ec 6.1.1.6) (lysine--trna ligase) (lysr) (kiaa0070). 7/1998 [MASS=68034]/Lysyl-tRNA synthetase, a class II aminoacyl tRNA synthetase, aminoacylates its cognate tRNAs with lysine for protein biosynthesis, packaged into HIV virions, exists as cytoplasmic and mitochondrial alternative forms                                                                      |
| GP:AK023618_1   | NDRG3        | 45         | 2  | 1.01 | 0.10 | GP:AK023618_1 Homo sapiens cDNA FLJ13556 fis, clone PLACE1007705, moderately similar to Mus musculus mRNA for Ndr1 related protein Ndr3; unnamed protein product. [MASS=31484]/Protein with high similarity to human NDRG1, which is induced by nickel, homocysteine, 2-mercaptoethanol, and tunicamycin and is induced during colon carcinoma cell line differentiation                                                               |
| SW:TBA4_HUMAN   | TUBA4        | 45         | 25 | 1.01 | 0.25 | SW:TBA4_HUMAN P05215 homo sapiens (human), macaca fascicularis (crab eating macaque) (cynomolgus monkey), and mus musculus (mouse). tubulin alpha-4 chain. 7/1999 [MASS=49924]/Member of the tubulin-FtzA family, which are involved in polymer formation, has strong similarity to a region of mouse Tuba6, which is a structural protein that polymerizes to form microtubules                                                       |
| SW:IEFS_HUMAN   | STIP1        | 42         | 5  | 1.01 | 0.17 | SW:IEFS_HUMAN P31948 homo sapiens (human). transformation-sensitive protein ief ssp 3521. 10/1996 [MASS=62639]/Stress-induced phosphoprotein 1, a cochaperone that inhibits protein folding and may stabilize a heat shock protein complex on the lysosomal membrane, contains nine TPR (tetratricopeptide repeat) domains, which may mediate protein-protein interactions                                                             |
| SW:SRD6_HUMAN   | PGRMC2       | 41         | 1  | 1.01 | 0.00 | SW:SRD6_HUMAN O15173 homo sapiens (human). steroid receptor protein dg6. 5/2000 [MASS=23818]/Progesterone receptor membrane component 2, putative transmembrane steroid hormone receptor, preferentially expressed in placenta                                                                                                                                                                                                         |

|               |                        |           |    |      |      |                                                                                                                                                                                                                                                                                                                                                                                                                                                                                        |
|---------------|------------------------|-----------|----|------|------|----------------------------------------------------------------------------------------------------------------------------------------------------------------------------------------------------------------------------------------------------------------------------------------------------------------------------------------------------------------------------------------------------------------------------------------------------------------------------------------|
| GP:AF112214_1 | RPL13                  | 35        | 1  | 1.01 | 0.00 | GP:AF112214_1 Homo sapiens ribosomal protein L13 mRNA, complete cds; RPL13. [MASS=19917]/Ribosomal protein L13, putative component of the 60S ribosomal subunit, expressed at higher levels in benign breast lesions than in carcinomas                                                                                                                                                                                                                                                |
| SW:PON2_HUMAN | PON2                   | 26        | 1  | 1.01 | 0.00 | SW:PON2_HUMAN Q15165 homo sapiens (human). serum paraoxonase/arylesterase 2 (ec 3.1.1.2) (ec 3.1.8.1) (pon 2) (serum arylalkylphosphatase 2) (a-esterase 2) (aromatic esterase 2). 7/1999 [MASS=39398]/Paraoxonase 2 (arylesterase 2), an antioxidant that protects low density lipoprotein against peroxidation, member of a family of proteins that hydrolyze toxic organophosphates; gene mutations are associated with an increased risk of coronary heart disease                 |
| SW:G19P_HUMAN | PRKCSH                 | 5         | 3  | 1.01 | 0.47 | SW:G19P_HUMAN P14314 homo sapiens (human). protein kinase c substrate, 80 kda protein, heavy chain (pkcsh) (80k-h protein). 7/1999 [MASS=59296]/Protein kinase C substrate 80K-H, acidic protein that is phosphorylated by type I and II protein kinase C, may play a role in fibroblast growth factor and Ras signal transduction, may be a receptor for advanced glycation end products                                                                                              |
| SW:DIAC_HUMAN | CTBS                   | 5, 32     | 1  | 1.00 | 0.00 | SW:DIAC_HUMAN Q01459 homo sapiens (human). di-n-acetylchitobiase precursor (ec 3.2.1.-). 7/1999 [MASS=43760]/Chitobiase (di-N-acetylchitobiase), a lysosomal glycosidase involved in the degradation of asparagine-linked glycoproteins                                                                                                                                                                                                                                                |
| SW:KPB1_HUMAN | PHKA1                  | 5, 18     | 3  | 1.00 | 0.09 | SW:KPB1_HUMAN P46020 homo sapiens (human). phosphorylase b kinase alpha regulatory chain, skeletal muscle isoform (phosphorylase kinase alpha m subunit). 2/1996 [MASS=137338]/Phosphorylase kinase regulatory subunit alpha-1 (muscle), which phosphorylates and thereby activates muscle-specific glycogen phosphorylase (PYGM); mutations in the corresponding gene are associated with muscle glycogenosis, a glycogen storage disease                                             |
| SW:TPIS_HUMAN | TPI1                   | 5, 16, 18 | 9  | 1.00 | 0.18 | SW:TPIS_HUMAN P00938 homo sapiens (human), and pan troglodytes (chimpanzee). triosephosphate isomerase (ec 5.3.1.1) (tim). 7/1998 [MASS=26538]/Triosephosphate isomerase 1, catalyzes the reversible interconversion of glyceraldehyde 3-phosphate and dihydroxyacetone phosphate in glycolysis; variant forms cause hemolytic anemia and neurodegeneration; variant form is an antigen on melanoma cells                                                                              |
| GP:AB020697_1 | DDX30                  | 45        | 1  | 1.00 | 0.00 | GP:AB020697_1 Homo sapiens mRNA for KIAA0890 protein, complete cds. [MASS=133938]/Protein containing two helicase conserved C-terminal domains and four double-stranded RNA binding domains, 6), has a region of low similarity to a region of S. pombe Cdc28p, which is an ATP-dependent RNA helicase involved in cell cycle progression                                                                                                                                              |
| GP:AK022827_1 | FLJ12765               | 45        | 1  | 1.00 | 0.00 | GP:AK022827_1 Homo sapiens cDNA FLJ12765 fis, clone NT2RP2001511, moderately similar to Homo sapiens putative RNA-binding protein Q99 mRNA; unnamed protein product. [MASS=97330]/Protein with high similarity to C. elegans ALG-1, which is a piwi-related protein involved in the production of siRNA (small temporal RNA) of LIN-4, contains a PAZ (Piwi, Argonaud and Zwillie) domain, which may mediate protein-protein interactions                                              |
| GP:U25756_1   | Ki nuclear autoantigen | 45        | 1  | 1.00 | 0.00 | GP:U25756_1 Human Ki nuclear autoantigen gene, partial cds; region of similarity to Ki nuclear autoantigen mRNA sequence, GenBank Accession Number U11292. [MASS=6323]                                                                                                                                                                                                                                                                                                                 |
| SW:CYTC_HUMAN | CST3                   | 45        | 2  | 1.00 | 0.03 | SW:CYTC_HUMAN P01034 homo sapiens (human). cystatin c precursor (neuroendocrine basic polypeptide) (gamma-trace) (post-gamma-globulin). 5/2000 [MASS=15799]/Cystatin C, a cysteine protease inhibitor regulated by TGFβ1, may have roles in vascular remodeling and disease; mutations in the gene cause hereditary cystatin C amyloid angiopathy, in which amyloid aggregates form in the brain                                                                                       |
| GP:AC006942_1 | ADTAA                  | 43        | 5  | 1.00 | 0.28 | GP:AC006942_1 Homo sapiens chromosome 19, cosmid R31181, complete sequence CLATHRIN ASSEMBLY PROTEIN COMPLEX 2 ALPHA-A LARGE CHAIN); Non-consensus splice junction found at position 18996. [MASS=90046]/Adaptor-related protein complex 2 alpha 1 subunit, component of the clathrin adaptor complex, involved in vesicle transport                                                                                                                                                   |
| SW:CD59_HUMAN | CD59                   | 41        | 8  | 1.00 | 0.26 | SW:CD59_HUMAN P13987 homo sapiens (human). cd59 glycoprotein precursor (membrane attack complex inhibition factor) (macif) (mac-inhibitory protein) (mac-ip) (mem43 antigen) (protectin) (membrane inhibit [MASS=14177]/CD59 antigen (protectin), plasma membrane-secreted protein, inhibits formation of the membrane attack complex and protects against complement-mediated cell lysis, acts as a T-cell co-activator, may contribute to tumor cell escape from immune surveillance |
| SW:RL32_HUMAN | RPL32                  | 35        | 7  | 1.00 | 0.12 | SW:RL32_HUMAN P02433 homo sapiens (human), mus musculus (mouse), and rattus norvegicus (rat). 60s ribosomal protein l32. 6/1994 [MASS=15729]/Ribosomal protein L32, an RNA-binding structural component of the large 60S ribosomal subunit that is likely to play a role in protein biosynthesis                                                                                                                                                                                       |
| SW:TPP2_HUMAN | TPP2                   | 32        | 5  | 1.00 | 0.14 | SW:TPP2_HUMAN P29144 homo sapiens (human). tripeptidyl-peptidase ii (ec 3.4.14.10) (tpp ii) (tripeptidyl aminopeptidase). 11/1997 [MASS=138449]/Tripeptidyl peptidase II, a serine exopeptidase that may provide an alternative, non-proteasomal mechanism for protein turnover, participates in the apoptotic pathway activated by Shigella, upregulated in Burkitt's lymphoma cells overexpressing MYC                                                                               |
| SW:ARP2_HUMAN | ACTR2                  | 8, 11, 34 | 5  | 0.99 | 0.15 | SW:ARP2_HUMAN O15142 homo sapiens (human). actin-like protein 2. 7/1999 [MASS=44761]/Actin-related protein 2 homolog, a component of the Arp2/3 protein complex, which is involved in actin filament nucleation and polymerization, may form the nucleation interface with the pointed end of the actin filament                                                                                                                                                                       |
| SW:TERA_HUMAN | VCP                    | 7, 43     | 41 | 0.99 | 0.20 | SW:TERA_HUMAN P55072 homo sapiens (human). transitional endoplasmic reticulum atpase (ter atpase) (15s mg(2+)-atpase p97 subunit) (valosin containing protein) (vcp) [contains: valosin]. 7/1999 [MASS=89322]/Valosin-containing protein, a putative clathrin-binding ATPase involved in cell cycle control, ubiquitin-dependent protein degradation, and JAK-STAT signaling, may be involved in DNA repair via BRCA1, may be involved in receptor-mediated endocytosis                |
| SW:EFA5_HUMAN | EFNA5                  | 6, 41     | 1  | 0.99 | 0.00 | SW:EFA5_HUMAN P52803 homo sapiens (human). ephrin-a5 precursor (eph-related receptor tyrosine kinase ligand 7) (lerk-7) (al-1). 5/2000 [MASS=26297]/Ephrin A5, a ligand of Eph-related receptor tyrosine kinases that is attached to the membrane via glycosylphosphatidylinositol linkage and is developmentally regulated in the brain, and may play a role during neurogenesis                                                                                                      |

|               |               |                   |    |      |      |                                                                                                                                                                                                                                                                                                                                                                                                                                                                  |
|---------------|---------------|-------------------|----|------|------|------------------------------------------------------------------------------------------------------------------------------------------------------------------------------------------------------------------------------------------------------------------------------------------------------------------------------------------------------------------------------------------------------------------------------------------------------------------|
| SW:PUR6_HUMAN | PAICS         | 25, 26            | 7  | 0.99 | 0.09 | SW:PUR6_HUMAN P22234 homo sapiens (human). multifunctional protein ade2 [includes: phosphoribosylaminoimidazole-succinocarboxamide synthase (ec 6.3.2.6) (saicar synthetase); phosphoribosylaminoimidazol [MASS=47079]/SAICAR (phosphoribosylaminoimidazole-succinocarboxamide) synthetase and AIR (phosphoribosylaminoimidazole) carboxylase, a bifunctional protein required for de novo purine biosynthesis                                                   |
| SW:ASAH_HUMAN | ASAH          | 16, 19            | 1  | 0.99 | 0.00 | SW:ASAH_HUMAN Q13510 homo sapiens (human). acid ceramidase precursor (ec 3.5.1.23) (acylsphingosine deacylase) (n-acylsphingosine amidohydrolase) (ac) (putative 32 kda heart protein) (php32). 5/2000 [MASS=44650]/N-acylsphingosine deacylase amidohydrolase (acid ceramidase), catalyzes hydrolysis of ceramide to sphingosine and free fatty acid, inhibits apoptosis, upregulated in prostate cancer, deficiency is associated with Farber disease          |
| GP:AB014555_1 | HIP12         | 45                | 1  | 0.99 | 0.00 | GP:AB014555_1 Homo sapiens mRNA for KIAA0655 protein, partial cds. [MASS=120902]/Huntingtin interacting protein 1 related protein, putative actin-binding protein predicted to be involved in actin polymerization, interacts with HIP1 but not Huntingtin (HD)                                                                                                                                                                                                  |
| GP:AB037773_1 | KIAA1352      | 45                | 8  | 0.99 | 0.20 | GP:AB037773_1 Homo sapiens mRNA for KIAA1352 protein, partial cds; Start codon is not identified.. [MASS=138362]/                                                                                                                                                                                                                                                                                                                                                |
| PIR2:I52882   | RCD-8         | 45                | 2  | 0.99 | 0.02 | PIR2:I52882 autoantigen - human [MASS=131858]/Protein of unknown function                                                                                                                                                                                                                                                                                                                                                                                        |
| PIR2:T46375   | DKFZp434D1319 | 45                | 1  | 0.99 | 0.00 | PIR2:T46375 hypothetical protein DKFZp434D1319.1 - human [MASS=49166]                                                                                                                                                                                                                                                                                                                                                                                            |
| SW:ADB1_HUMAN | AP1B1         | 43                | 20 | 0.99 | 0.27 | SW:ADB1_HUMAN Q10567 homo sapiens (human). beta-adaptin 1 (plasma membrane adaptor ha2/ap2 adaptor beta subunit) (clathrin assembly protein complex 2 beta large chain) (ap105a). 7/1999 [MASS=104607]/Adaptor-related protein complex 1 beta 1, likely participates in clathrin-coated vesicle endocytosis and intracellular receptor transport; loss is associated with meningioma tumors                                                                      |
| SW:TCPA_HUMAN | CCT1          | 33                | 8  | 0.99 | 0.36 | SW:TCPA_HUMAN P17987 homo sapiens (human). t-complex protein 1, alpha subunit (tcp-1-alpha) (cct-alpha). 5/2000 [MASS=60344]/T-complex 1, subunit of the cytosolic chaperonin containing TCP-1 (CCT), may assist in the proper folding of tubulin, and may be involved in the response to chemical stressors                                                                                                                                                     |
| SW:PRS4_HUMAN | PSMC1         | 32                | 12 | 0.99 | 0.17 | SW:PRS4_HUMAN Q03527 homo sapiens (human). 26s protease regulatory subunit 4 (p26s4). 12/1998 [MASS=49185]/Proteasome 26S subunit ATPase 1, an ATPase subunit of the 26S proteasome multicatalytic protease complex, may play a role in ubiquitin-dependent protein degradation, interacts with the papilloma virus oncoprotein E7                                                                                                                               |
| SW:HS9A_HUMAN | HSPCA         | 31                | 7  | 0.99 | 0.41 | SW:HS9A_HUMAN P07900 homo sapiens (human). heat shock protein hsp 90-alpha (hsp 86). 5/2000 [MASS=84543]/Heat shock 90kD protein 1 alpha, a molecular chaperone that mediates protein folding, activates MAPK1, MAPK3, and caspase, may regulate a G protein-coupled receptor signaling pathway, may promote the proliferation of breast cancer cells                                                                                                            |
| SW:RAPA_HUMAN | RAP1A         | 7, 41             | 1  | 0.98 | 0.00 | SW:RAPA_HUMAN P10113 homo sapiens (human), rattus norvegicus (rat), and bos taurus (bovine). ras-related protein rap-1a (c21kg) (krev-1 protein) (gtp-binding protein smg-p21a) (g-22k). 12/1998 [MASS=20987]/RAP1A member of RAS oncogene family (Ras-related protein 1a), a member of the Ras superfamily of low molecular weight GTPases that is involved in cell cycle control and negative regulation of cellular proliferation, acts as a tumor suppressor |
| SW:RAN_HUMAN  | RAN           | 7, 15, 23, 24, 41 | 3  | 0.98 | 0.04 | SW:RAN_HUMAN P17080 homo sapiens (human). gtp-binding nuclear protein ran (tc4). 12/1998 [MASS=24354]/RAN, member of the ras family of GTP binding proteins, couples completion of DNA synthesis to mitosis and induces mitotic spindle formation, involved in nuclear transport of RNA and proteins, interacts with polyglutamate repeats of the androgen receptor                                                                                              |
| SW:DYNA_HUMAN | DCTN1         | 4, 7, 23          | 1  | 0.98 | 0.00 | SW:DYNA_HUMAN Q14203 homo sapiens (human). dynactin, 150 kda isoform (150 kda dynein-associated polypeptide) (dp-150) (dap-150) (p150-glued) (p135) (fragment). 5/2000 [MASS=140784]/Dynactin 1 ((p150, Glued (Drosophila) homolog), microtubule associated protein, interacts with HsEg5 (KNSL1), may play a role in cell division, level is reduced in apoptotic cells                                                                                         |
| SW:LYN_HUMAN  | LYN           | 34, 41            | 2  | 0.98 | 0.02 | SW:LYN_HUMAN P07948 homo sapiens (human). tyrosine-protein kinase lyn (ec 2.7.1.112). 5/2000 [MASS=58443]/ protein tyrosine kinase, a non-receptor tyrosine kinase important in cytokine receptor- and IgE receptor-mediated signal transduction, regulates cell adhesion and apoptosis, plays a role in platelet activation and inflammatory responses                                                                                                          |
| SW:CAZ2_HUMAN | CAPZA2        | 11, 31            | 1  | 0.98 | 0.00 | SW:CAZ2_HUMAN P47755 homo sapiens (human). f-actin capping protein alpha-2 subunit (capz). 12/1998 [MASS=32949]/Capping protein Z-line (alpha 2), subunit of an actin-binding protein that may play a role in cell motility; corresponding gene is amplified in malignant gliomas and may be involved in tumorigenesis                                                                                                                                           |
| GP:AB037728_1 | KIAA1307      | 45                | 2  | 0.98 | 0.03 | GP:AB037728_1 Homo sapiens mRNA for KIAA1307 protein, partial cds; Start codon is not identified.. [MASS=186192]/Protein containing two putative zinc finger in N-recognition domains                                                                                                                                                                                                                                                                            |
| GP:AJ293573_1 | CEZANNE       | 45                | 1  | 0.98 | 0.00 | GP:AJ293573_1 Homo sapiens mRNA for zinc finger protein Cezanne (CEZANNE gene). [MASS=94401]/of unknown function, has a region of low similarity to a region of tumor necrosis factor alpha-induced protein 3 (mouse Tnfaip3), which is a cytoplasmic protein that blocks NF-kappaB activation and inhibits Tnf -induced apoptosis and necrosis                                                                                                                  |
| GP:AK025999_1 | E2-230K       | 45                | 1  | 0.98 | 0.00 | GP:AK025999_1 Homo sapiens cDNA: FLJ22346 fis, clone HRC06158; unnamed protein product. [MASS=81877]/Member of the ubiquitin-conjugating enzyme (E2) family, which catalyze the covalent attachment of ubiquitin to target proteins, has a region of moderate similarity to a region of mouse Birc6, which is a ubiquitin-conjugating enzyme                                                                                                                     |
| PIR2:G01447   | C5ORF8        | 45                | 3  | 0.98 | 0.04 | PIR2:G01447 GP36b glycoprotein - human [MASS=40229]/Protein of unknown function, has moderate similarity to a region of human LMAN1, which is a mannose-binding lectin involved in the traffic of glycoproteins between endoplasmic reticulum and the Golgi apparatus, and associated with a coagulation disorder                                                                                                                                                |
| SW:SP02_HUMAN | DLG3          | 45                | 1  | 0.98 | 0.00 | SW:SP02_HUMAN Q92796 homo sapiens (human). presynaptic protein sap102 (synapse-associated protein 102) (neuroendocrine-dlg) (ne-dlg). 5/2000 [MASS=90344]/Discs large (Drosophila) homolog 3 (neuroendocrine-dlg), putative guanylate kinase, inhibits cell proliferation, acts in neuronal cell adhesion, may facilitate neoplasm development or progression; corresponding gene is upregulated in ovarian carcinomas                                           |
| SW:SPC1_HUMAN | KIAA0102      | 45                | 3  | 0.98 | 0.03 | SW:SPC1_HUMAN Q15005 homo sapiens (human). microsomal signal peptidase 25 kda subunit (ec 3.4.-.-) (spc25) (kiaa0102). 5/2000 [MASS=25003]/Protein of unknown function                                                                                                                                                                                                                                                                                           |

|                |          |                |    |      |      |                                                                                                                                                                                                                                                                                                                                                                                                                                                                                      |
|----------------|----------|----------------|----|------|------|--------------------------------------------------------------------------------------------------------------------------------------------------------------------------------------------------------------------------------------------------------------------------------------------------------------------------------------------------------------------------------------------------------------------------------------------------------------------------------------|
| SW:TGT_HUMAN   | TGT      | 45             | 6  | 0.98 | 0.19 | SW:TGT_HUMAN P54578 homo sapiens (human). queuine trna-ribosyltransferase (ec 2.4.2.29) (trna-guanine transglycosylase) (guanine insertion enzyme). 5/2000 [MASS=55938]/trna-guanine transglycosylase, catalyses the exchange of queuine for guanine in the first position of the anticodon of tRNAs for asparagine, aspartic acid, histidine and tyrosine                                                                                                                           |
| SW:VE1_HPV14   | E1       | 44             | 1  | 0.98 | 0.00 | SW:VE1_HPV14 P36721 human papillomavirus type 14. replication protein e1. 7/1998 [MASS=69302]/ATP-DEPENDENT DNA HELICASE REQUIRED FOR INITIATION OF VIRAL DNA REPLICATION. IT FORMS A COMPLEX WITH THE VIRAL E2 PROTEIN. THE E1-E2 COMPLEX BINDS TO THE REPLICATION ORIGIN WHICH CONTAINS BINDING SITES FOR BOTH PROTEINS                                                                                                                                                            |
| SWN:SU12_HUMAN | GC20     | 35             | 4  | 0.98 | 0.06 | SWN:SU12_HUMAN Q9unq9 homo sapiens (human). protein translation factor sui1 homolog a121. 8/2001 [MASS=12745]/Translation factor sui1 homolog, a translation initiation factor, plays a role in initiating translation, may modulate translation initiation during periods of cell stress such as UV-induced and endoplasmic reticulum stress                                                                                                                                        |
| SW:C211_HUMAN  | PTTG1IP  | 24             | 2  | 0.98 | 0.03 | SW:C211_HUMAN P53801 homo sapiens (human). putative surface glycoprotein c21orf1 precursor (c21orf3). 7/1999 [MASS=20324]/Pituitary tumor-transforming gene 1 interacting protein, binds to pituitary tumor-transforming gene (PTTG1) and may promote nuclear translocation of PPTG1 to the nucleus                                                                                                                                                                                  |
| SW:DREB_HUMAN  | DBN1     | 11             | 1  | 0.98 | 0.00 | SW:DREB_HUMAN Q16643 homo sapiens (human). drebrin e. 7/1998 [MASS=71425]/Drebrin 1, developmentally regulated actin-binding protein expressed in brain, levels are reduced in Alzheimer's patients                                                                                                                                                                                                                                                                                  |
| SW:K6PL_HUMAN  | PFKL     | 5, 18          | 8  | 0.97 | 0.17 | SW:K6PL_HUMAN P17858 homo sapiens (human). 6-phosphofructokinase, liver type (ec 2.7.1.11) (phosphofructokinase 1) (phosphohexokinase) (phosphofructo-1-kinase isozyme b). 10/1996 [MASS=85148]/Liver phosphofructokinase, catalyses the phosphorylation of fructose-6-phosphate to fructose-1,6-bisphosphate in glycolysis, deficiency is linked to glycogenesis type VII while overexpression may lead to the cognitive disabilities of Down's syndrome                            |
| SW:PRO1_HUMAN  | PFN1     | 11, 41         | 4  | 0.97 | 0.39 | SW:PRO1_HUMAN P07737 homo sapiens (human). profilin i. 12/1998 [MASS=14923]/Profilin I, a protein that regulates actin polymerization in response to extracellular signals and may suppress breast cancer cell tumorigenicity                                                                                                                                                                                                                                                        |
| SW:MK01_HUMAN  | MAPK1    | 10, 34, 41, 42 | 1  | 0.97 | 0.00 | SW:MK01_HUMAN P28482 homo sapiens (human). mitogen-activated protein kinase 1 (ec 2.7.1.-) (extracellular signal-regulated kinase 2) (erk2) (mitogen-activated protein kinase 2) (map kinase 2) (mapk 2) [MASS=41390]/Mitogen-activated protein kinase 1, a serine-threonine kinase effector of the RAS-MAP kinase pathway, translocates to the nucleus to mediate transcription when activated, involved in the regulation of cell growth, differentiation, migration and apoptosis |
| GP:AK023834_1  | FLJ13772 | 45             | 1  | 0.97 | 0.00 | GP:AK023834_1 Homo sapiens cDNA FLJ13772 fis, clone PLACE4000300; unnamed protein product. [MASS=72580]/Protein of unknown function                                                                                                                                                                                                                                                                                                                                                  |
| PIR2:T47160    | RAB14    | 45             | 6  | 0.97 | 0.25 | PIR2:T47160 hypothetical protein DKFZp762K0911.1 - human [MASS=23897]/Ras-related GTP-binding protein 14, putative GTP binding protein and GTPase, induced in lung fibroblasts in response to endothelin treatment                                                                                                                                                                                                                                                                   |
| SW:LYII_HUMAN  | CD36L2   | 45             | 2  | 0.97 | 0.07 | SW:LYII_HUMAN Q14108 homo sapiens (human). lysosome membrane protein ii (limp ii) (85 kda lysosomal membrane sialoglycoprotein) (lgp85) (cd36 antigen-like 2). 7/1998 [MASS=54159]/Lysosomal integral membrane protein II, a lysosomal membrane sialoglycoprotein with similarity to CD36 antigen                                                                                                                                                                                    |
| GP:AF092130_1  | MADHIP   | 41             | 1  | 0.97 | 0.00 | GP:AF092130_1 Homo sapiens GTP-binding protein Sara mRNA, complete cds. [MASS=22410]/Mothers against decapentaplegic homolog interacting protein receptor activation anchor (Smad anchor for receptor activation), an early endosomal protein involved in activin- and TGF beta-mediated Smad activation, binds phosphatidylinositol 3-phosphate                                                                                                                                     |
| PIR2:S29815    | P2RY4    | 41             | 1  | 0.97 | 0.00 | PIR2:S29815 N-ras upstream protein NRU - human [MASS=88885]/Pyrimidinergic receptor P2Y4, a G protein-coupled nucleotide receptor activated by UTP and ATP and insensitive to inhibition by suramin, signals through stimulation of phosphoinositide hydrolysis and elevation of intracellular calcium                                                                                                                                                                               |
| SW:PRCI_HUMAN  | PSMA6    | 32             | 12 | 0.97 | 0.27 | SW:PRCI_HUMAN P34062 homo sapiens (human), and rattus norvegicus (rat). proteasome iota chain (ec 3.4.99.46) (macropain iota chain) (multicatalytic endopeptidase complex iota chain) (27 kda prosomal pro [MASS=27399]/Proteasome subunit alpha type 6, a member of the alpha type prosomal gene family, part of a multicatalytic protease complex involved in cellular protein degradation; also binds RNA specifically                                                            |
| SW:ICLN_HUMAN  | CLNS1A   | 42             | 1  | 0.96 | 0.00 | SW:ICLN_HUMAN P54105 homo sapiens (human). chloride conductance regulatory protein icln (chloride channel, nucleotide sensitive 1a) (chloride ion current inducer protein) (clci) (reticulocyte picln). 12 [MASS=26215]/Chloride channel nucleotide-sensitive 1A, a putative chloride channel regulator, binds beta-actin, may regulate chloride transport and cell volume (especially in young red blood cells), may play a role in aqueous humor formation in the eye              |
| PIR2:I38176    | RAGA     | 41             | 1  | 0.96 | 0.00 | PIR2:I38176 ras-related GTPase rag, splice form A [imported] - human [MASS=36566]/Ras-related GTP binding protein, a GTP-binding protein that lacks GTPase activity, interacts with RAGC (GTR2), RAGD, and the adenovirus 14.7 kDa E3 protein, may be part of the tumor necrosis factor alpha (TNF) signaling pathway                                                                                                                                                                |
| SW:IF5A_HUMAN  | EIF5A    | 35             | 4  | 0.96 | 0.06 | SW:IF5A_HUMAN P10159 homo sapiens (human). initiation factor 5a (eif-5a) (eif-4d) (rev binding factor). 5/2000 [MASS=16701]/Eukaryotic initiation factor 5A, a translation initiation factor, also an HIV-1 transactivator protein Rev cofactor that exports viral mRNA from the nucleus                                                                                                                                                                                             |
| SW:RM03_HUMAN  | MRPL3    | 35             | 1  | 0.96 | 0.00 | SW:RM03_HUMAN P09001 homo sapiens (human). mitochondrial 60s ribosomal protein l3. 8/1992 [MASS=38633]/Mitochondrial ribosomal protein L3, a likely component of the large mitochondrial 60S ribosomal subunit, may be involved in mRNA binding to the ribosome, can interact with the 3' UTR of hepatitis C; elevated levels are associated with hepatocarcinoma                                                                                                                    |
| SW:TCPH_HUMAN  | CCT7     | 7, 33          | 2  | 0.95 | 0.10 | SW:TCPH_HUMAN Q99832 homo sapiens (human). t-complex protein 1, eta subunit (tcp-1-eta) (cct-eta) (hiv-1 nef interacting protein). 7/1998 [MASS=59367]/Chaperonin containing T-complex polypeptide-1 (TCP1) subunit 7, the eta subunit of the chaperonin containing complex (CCT), plays a role in protein folding and in the response to chemical stress, may be required for proper folding of cyclin E                                                                            |

|                |               |               |    |      |      |                                                                                                                                                                                                                                                                                                                                                                                                                                      |
|----------------|---------------|---------------|----|------|------|--------------------------------------------------------------------------------------------------------------------------------------------------------------------------------------------------------------------------------------------------------------------------------------------------------------------------------------------------------------------------------------------------------------------------------------|
| SW:APP2_HUMAN  | APLP2         | 7, 16, 41     | 2  | 0.95 | 0.08 | SW:APP2_HUMAN Q06481 homo sapiens (human), amyloid-like protein 2 precursor (amyloid protein homolog) (apph) (cde-box binding protein) (cdebp). 5/2000 [MASS=86956]/Amyloid precursor-like protein 2, a nuclear protein which may contribute to neurogenesis and cell cycle control                                                                                                                                                  |
| SW:RHOA_HUMAN  | ARHA          | 7, 11, 41     | 37 | 0.95 | 0.25 | SW:RHOA_HUMAN P06749 homo sapiens (human), and bos taurus (bovine), transforming protein rhoa (h12). 7/1998 [MASS=21768]/Ras homolog gene family member A, monomeric GTPase of the Rho family that mediates cell surface receptor and integrin signaling, induces actin stress fiber and focal adhesion formation, activity may contribute to cellular transformation and tumor invasion                                             |
| PIR2:T46270    | FLNB          | 11, 41        | 12 | 0.95 | 0.39 | PIR2:T46270 hypothetical protein DKFZp564N1563.1 - human (fragment) [MASS=77321]/Filamin B (beta, actin-binding protein-278), may be involved in actin cytoskeleton organization through interaction with the cytoplasmic domain of glycoprotein Ib alpha (GP1BA) and mediation of thyrotropin-induced actin microfilament disruption                                                                                                |
| SW:SYV_HUMAN   | VAR52         | 1, 35, 37     | 4  | 0.95 | 0.14 | SW:SYV_HUMAN P26640 homo sapiens (human), valyl-trna synthetase (ec 6.1.1.9) (valine--trna ligase) (valrs). 2/1996 [MASS=140377]/Valyl-tRNA synthetase 2, a putative class I tRNA sythetase, predicted to function in aminoacylation of valyl tRNAs for protein biosynthesis                                                                                                                                                         |
| GP:AB032993_1  | GRIPAP1       | 45            | 1  | 0.95 | 0.00 | GP:AB032993_1 Homo sapiens mRNA for KIAA1167 protein, partial cds; Start codon is not identified.; hj01786 cDNA clone for KIAA1167 has 1412-bp and 708-bp insertions (may be introns) after the positions 850 and 2258 of the sequence of KIAA1167, respectively.. [MASS=95259]/Protein of unknown function/Protein of unknown function                                                                                              |
| GP:AJ245820_1  | psk-1         | 45            | 1  | 0.95 | 0.00 | GP:AJ245820_1 Homo sapiens mRNA for type I transmembrane receptor (psk-1 gene). [MASS=92455]/Protein with high similarity to murine Sez6, which is expressed in the brain and may play a role in seizure, contains five sushi or short consensus repeat domains, which are found in complement and adhesion proteins, and an extracellular CUB domain                                                                                |
| GPN:AL512750_1 | FLJ11127      | 45            | 1  | 0.95 | 0.00 | GP:BC011524_1 Homo sapiens, Similar to hypothetical protein, clone MGC:8793 IMAGE:3872837, mRNA, complete cds. [MASS=42196]/Protein of unknown function, has moderate similarity to uncharacterized human LOC90268                                                                                                                                                                                                                   |
| GP:D87930_1    | PPP1R12A      | 41            | 3  | 0.95 | 0.13 | GP:D87930_1 Homo sapiens mRNA for myosin phosphatase target subunit 1 (MYPT1); MYPT1. [MASS=115281]/Myosin phosphatase target subunit 1, a signal transducer that is involved in Rho-mediated regulation of myosin light chain dephosphorylation, may function in muscle contraction                                                                                                                                                 |
| SW:IMD2_HUMAN  | IMPDH2        | 25            | 8  | 0.95 | 0.32 | SW:IMD2_HUMAN P12268 homo sapiens (human), inosine-5'-monophosphate dehydrogenase 2 (ec 1.1.1.205) (imp dehydrogenase 2) (impdh-ii) (impd 2). 5/2000 [MASS=55805]/Inosine monophosphate dehydrogenase type 2, catalyzes the oxidation of inosine monophosphate to xanthosine monophosphate in GTP biosynthesis, required for T cell activation, a target for immunosuppressive and anticancer chemotherapy                           |
| SW:ODO1_HUMAN  | OGDH          | 5, 18         | 9  | 0.94 | 0.18 | SW:ODO1_HUMAN Q02218 homo sapiens (human), 2-oxoglutarate dehydrogenase e1 component, mitochondrial precursor (ec 1.2.4.2) (alpha-ketoglutarate dehydrogenase), 7/1999 [MASS=113475]/2-Oxoglutarate dehydrogenase (alpha-ketoglutarate dehydrogenase), E1 component of the complex that converts alpha-ketoglutarate to succinyl coenzyme A in the Krebs cycle; deficiency has been observed in Alzheimer and Parkinson disease      |
| SW:SYQ_HUMAN   | QARS          | 2, 25, 35, 37 | 2  | 0.94 | 0.20 | SW:SYQ_HUMAN P47897 homo sapiens (human), glutaminyl-trna synthetase (ec 6.1.1.18) (glutamine--trna ligase) (glnrs). 5/2000 [MASS=87799]/Glutaminyl-tRNA synthetase, aminoacylates cognate tRNAs with glutamine for protein biosynthesis, also suppresses FAS (TNFRSF6)-mediated apoptosis by inhibiting ASK1 (MAP3K5) kinase activity, contains N-terminal appended and C-terminal catalytic domains                                |
| GP:AC005067_2  | NPD007        | 45            | 2  | 0.94 | 0.17 | GP:AC005067_2 Homo sapiens BAC clone CTB-122E10 from 7q11.23-q21.1, complete sequence; Supported by Human EST H08032.1 (NID:g872854), mouse EST AA870042.1 (NID:g2965487), and genscan; H_RG122E10.2b. [MASS=39202]/Member of the rhomboid family of integral membrane proteins                                                                                                                                                      |
| GP:AF226054_1  | GK001         | 45            | 2  | 0.94 | 0.01 | GP:AF226054_1 Homo sapiens GK001 (GK001) mRNA, complete cds. [MASS=55816]/Protein of unknown function, has moderate similarity to uncharacterized C. elegans ZK1058.4                                                                                                                                                                                                                                                                |
| PIR2:T47174    | CORO1B        | 45            | 3  | 0.94 | 0.18 | PIR2:T47174 hypothetical protein DKFZp762I166.1 - human (fragment) [MASS=31436]/Protein with high similarity to coronin 1a (human CORO1A), which is an actin-binding protein that binds to phagocyte oxidases and may transport them to the phagosome membrane, contains three WD domains (WD-40 repeat)                                                                                                                             |
| SW:S23A_HUMAN  | SEC23A        | 43            | 5  | 0.94 | 0.18 | SW:S23A_HUMAN Q15436 homo sapiens (human), protein transport protein sec23 homolog isoform a. 11/1997 [MASS=86147]/Sec23 homolog A, a putative intracellular transporter that plays a role in protein trafficking, interacts with SEC24B and SEC24C                                                                                                                                                                                  |
| GP:AK022853_1  | NTT73         | 42            | 1  | 0.94 | 0.00 | GP:AK022853_1 Homo sapiens cDNA FLJ12791 fis, clone NT2RP2001991, highly similar to SODIUM- AND CHLORIDE-DEPENDENT TRANSPORTER NTT73; unnamed protein product. [MASS=32264]/Orphan transporter V7-3, a member of the sodium:neurotransmitter symporter family with an unknown substrate specificity, predominantly expressed in neuronal tissues                                                                                     |
| SWN:E2BD_HUMAN | DKFZP586J0119 | 35            | 2  | 0.94 | 0.19 | SWN:E2BD_HUMAN Q9ui10 homo sapiens (human), translation initiation factor eif-2b delta subunit (eif-2b gdp-gtp exchange factor). 8/2001 [MASS=57599]/Protein with strong similarity to eukaryotic translation initiation factor 2B delta subunit (rat Eif2b), which is a guanine nucleotide-exchange factor subunit of eIF-2B that mediates inhibition of eIF-2B, member of the initiation factor 2 subunit family                   |
| SW:CYPB_HUMAN  | PPIB          | 33            | 15 | 0.94 | 0.20 | SW:CYPB_HUMAN P23284 homo sapiens (human), peptidyl-prolyl cis-trans isomerase b precursor (ec 5.2.1.8) (ppiase) (rotamase) (cyclophilin b) (s-cyclophilin) (scylp) (cyp-s1). 7/1999 [MASS=22742]/Cyclophilin B, a peptidyl prolyl cis-trans isomerase that binds to and is inhibited by the immunosuppressive drug cyclosporin A, plays a role in protein folding, binds to the human immunodeficiency virus type I Gag polyprotein |

|                |          |                |    |      |      |                                                                                                                                                                                                                                                                                                                                                                                                                                                                                      |
|----------------|----------|----------------|----|------|------|--------------------------------------------------------------------------------------------------------------------------------------------------------------------------------------------------------------------------------------------------------------------------------------------------------------------------------------------------------------------------------------------------------------------------------------------------------------------------------------|
| SW:ACTB_HUMAN  | ACTB     | 11             | 32 | 0.94 | 0.59 | SW:ACTB_HUMAN P02570 homo sapiens (human), mus musculus (mouse), rattus norvegicus (rat), bos taurus (bovine), ovis aries (sheep), equus caballus (horse), trichosurus vulpecula (brush-tailed possum), an [MASS=41737]/Beta actin, a non-muscle cell actin that is the site of action for cytochalasin B effects on cell motility and also inhibits phospholipase D activity; mutation of the gene is associated with neutrophil dysfunction and recurrent infections               |
| SW:DHAG_HUMAN  | ALDH9A1  | 5              | 1  | 0.94 | 0.00 | SW:DHAG_HUMAN P49189 homo sapiens (human). aldehyde dehydrogenase, e3 isozyme (ec 1.2.1.3) (gamma-aminobutyraldehyde dehydrogenase) (ec 1.2.1.19) (r-aminobutyraldehyde dehydrogenase). 5/2000 [MASS=53533]/Gamma-aminobutyraldehyde dehydrogenase (aldehyde dehydrogenase 9, subfamily A1), member of NAD(P)(+)-dependent aldehyde dehydrogenase family, catalyzes the dehydrogenation of gamma-aminobutyraldehyde, may regulate carnitine biosynthesis                             |
| SW:PGK1_HUMAN  | PGK1     | 5, 18          | 16 | 0.93 | 0.18 | SW:PGK1_HUMAN P00558 homo sapiens (human). phosphoglycerate kinase 1 (ec 2.7.2.3) (primer recognition protein 2) (prp 2). 7/1999 [MASS=44597]/Phosphoglycerate kinase 1, catalyzes conversion of 1,3-diphosphoglycerate to 3-phosphoglycerate in glycolysis, forming one molecule of ATP; PGK1 gene transcription is induced by hypoxia and mutation is associated with non-spherocytic hemolytic anemia                                                                             |
| GPN:AB025194_1 | HD-PTP   | 34, 41         | 1  | 0.93 | 0.00 | GP:AB025194_1 Homo sapiens mRNA for protein tyrosine phosphatase HD-PTP, complete cds. [MASS=178974]/Member of the protein-tyrosine phosphatase family, has a region of strong similarity to a region of protein tyrosine phosphatase TD14 (rat Ptpn23), which is a putative tyrosine phosphatase that associates with cytoplasmic vesicles when overexpressed                                                                                                                       |
| GP:AC005545_2  | AP3D1    | 26, 43         | 2  | 0.93 | 0.18 | GP:AC005545_2 Homo sapiens chromosome 19, cosmid R26634, complete sequence; vesicle coat component, similar to alpha and gamma adaptins. [MASS=121170]/Adaptor-related protein complex 3 delta 1 subunit, a component of the AP-3 complex, involved in intracellular vesicle transport                                                                                                                                                                                               |
| SW:CST1_HUMAN  | CSTF1    | 25, 37         | 1  | 0.93 | 0.00 | SW:CST1_HUMAN Q05048 homo sapiens (human). cleavage stimulation factor, 50 kda subunit (cstf 50 kda subunit) (cf-1 50 kda subunit). 7/1998 [MASS=48358]/Cleavage stimulation factor subunit 1, the 50 kDa subunit of the cleavage stimulation factor complex required for pre-mRNA polyadenylation and 3'-end cleavage, interacts with BARD1 and the C-terminal domain of the RNA polymerase II large subunit                                                                        |
| SWN:STX8_HUMAN | STX8     | 21, 23, 42, 43 | 1  | 0.93 | 0.00 | SWN:STX8_HUMAN Q9unk0 homo sapiens (human). syntaxin 8. 8/2001 [MASS=26907]/Syntaxin 8, member of the soluble NSF attachment protein receptor (SNARE) family, plays a role in endosome trafficking, may mediate vesicle docking and fusion, may regulate CFTR -mediated chloride currents                                                                                                                                                                                            |
| GP:AK021647_1  | MPPE1    | 45             | 1  | 0.93 | 0.00 | GP:AK021647_1 Homo sapiens cDNA FLJ11585 fis, clone HEMBA1003692; unnamed protein product. [MASS=16310]/Metallophosphoesterase 1, a putative transmembrane phosphoesterase expressed only in brain                                                                                                                                                                                                                                                                                   |
| SW:EF1B_HUMAN  | EEF1B1   | 45             | 3  | 0.93 | 0.05 | SW:EF1B_HUMAN P24534 homo sapiens (human). elongation factor 1-beta (ef-1-beta). 6/1994 [MASS=24633]/Eukaryotic translation elongation factor 1 beta 2, putative component of the eukaryotic translation elongation complex                                                                                                                                                                                                                                                          |
| SW:PPAL_HUMAN  | ACP2     | 45             | 1  | 0.93 | 0.00 | SW:PPAL_HUMAN P11117 homo sapiens (human). lysosomal acid phosphatase precursor (ec 3.1.3.2) (lap). 12/1992 [MASS=48344]/Lysosomal acid phosphatase, a tartrate-inhibitable lysosomal enzyme; mice lacking Acp2 are more susceptible to seizures                                                                                                                                                                                                                                     |
| PIR2:S69890    | MIG2     | 7              | 2  | 0.93 | 0.03 | PIR2:S69890 mitogen inducible gene mig-2 - human [MASS=81993]/Mitogen inducible 2, a mitogen-induced protein that may be involved in cell cycle control and cell proliferation                                                                                                                                                                                                                                                                                                       |
| SW:GDE_HUMAN   | AGL      | 5, 18          | 18 | 0.92 | 0.22 | SW:GDE_HUMAN P35573 homo sapiens (human). glycogen debranching enzyme (glycogen debrancher) [includes: 4-alpha-glucanotransferase (ec 2.4.1.25) (oligo-1,4-1,4-glycantransferase); amylo-1,6-glucosidase [MASS=172497]/Glycogen debranching enzyme, (amylo-1,6-glucosidase 4-alpha-glycanotransferase), catalyzes glycantransferase and glucosidase activities required for glycogen degradation; mutations and dysregulation are associated with type III glycogen storage diseases |
| SW:SYEP_HUMAN  | EPRS     | 2, 35, 37      | 23 | 0.92 | 0.84 | SW:SYEP_HUMAN P07814 homo sapiens (human). multifunctional aminoacyl-trna synthetase [includes: glutamyl-trna synthetase (ec 6.1.1.17) (glutamate--trna ligase); prolyl-trna synthetase (ec 6.1.1.15) (pro [MASS=163026]/Glutamyl-prolyl-trna synthetase, a bifunctional enzyme with two functionally separable domains, one that aminoacylates prolyl-tRNA with proline and another that is believed to aminoacylate glutamyl-tRNA with glutamate for protein biosynthesis          |
| GP:AF151793_1  | AIP1     | 11, 41         | 8  | 0.92 | 0.09 | GP:AF151793_1 Homo sapiens ALG-2 interacting protein 1 (AIP1) mRNA, complete cds. [MASS=96079]/Protein with very strong similarity to murine Mm.28049, which interacts with the activin type IIA receptor and signaling molecule Smad3, has very strong similarity to rat Rn.29998, which is a synaptic scaffolding protein, contains PDZ and WW domains                                                                                                                             |
| SW:UTRO_HUMAN  | UTRN     | 11, 16         | 7  | 0.92 | 0.24 | SW:UTRO_HUMAN P46939 homo sapiens (human). utrophin (dystrophin-related protein 1) (drp1) (drp). 7/1999 [MASS=394494]/Utrophin, a membrane-associated protein that interacts with cytoskeletal proteins, associated with muscle and neuromuscular junction development and cell adhesion, may partially compensate for dystrophin (DMD) deficiency in Duchenne's muscular dystrophy                                                                                                  |
| GPN:AF130092_1 | KIAA1049 | 45             | 4  | 0.92 | 0.08 | GP:AF130092_1 Homo sapiens clone FLB9715 PRO2620 mRNA, complete cds; predicted protein of HQ2620. [MASS=53655]/Protein of unknown function, has low similarity to uncharacterized S. pombe Spac1142.01p                                                                                                                                                                                                                                                                              |
| SW:CN37_HUMAN  | CNP      | 45             | 14 | 0.92 | 0.15 | SW:CN37_HUMAN P09543 homo sapiens (human). 2',3'-cyclic nucleotide 3'-phosphodiesterase (ec 3.1.4.37) (cnp) (cnpase). 5/2000 [MASS=47579]/2'3'-Cyclic nucleotide 3' phosphodiesterase, a myelin-associated phosphodiesterase that is involved in regulation of central nervous system myelination                                                                                                                                                                                    |
| SW:ACTZ_HUMAN  | ACTR1A   | 43             | 7  | 0.92 | 0.04 | SW:ACTZ_HUMAN P42024 homo sapiens (human), mus musculus (mouse), and canis familiaris (dog). alpha-centractin (centractin) (centrosome-associated actin homolog) (actin-rpv) (arp1). 7/1999 [MASS=42614]/Actin-related protein 1, a component of the dynactin complex involved in transport along microtubules, associates with centrophilin NUMA1 at nuclear envelope breakdown, expression is significantly reduced in Down syndrome fetal brain                                   |

|               |          |                   |    |      |      |                                                                                                                                                                                                                                                                                                                                                                                                                                                                                                                                                                |
|---------------|----------|-------------------|----|------|------|----------------------------------------------------------------------------------------------------------------------------------------------------------------------------------------------------------------------------------------------------------------------------------------------------------------------------------------------------------------------------------------------------------------------------------------------------------------------------------------------------------------------------------------------------------------|
| GP:AF284422_1 | LOC56996 | 42                | 1  | 0.92 | 0.00 | GP:AF284422_1 Homo sapiens cation-chloride cotransporter-interacting protein mRNA, complete cds; cation-chloride cotransporter family; CIP1; 96.2 kDa; predicted to contain 12 transmembrane domains and cytoplasmic N- and C-termini. [MASS=96171]/Cation-chloride cotransporter-interacting protein 1, inhibits Na <sup>+</sup> -K <sup>+</sup> -Cl <sup>-</sup> cotransporter 1-mediated transport activity, may modulate cation-chloride cotransporter activity or kinetics through heterodimer formation                                                  |
| SW:MOT4_HUMAN | SLC16A3  | 42                | 1  | 0.92 | 0.00 | SW:MOT4_HUMAN O15374 homo sapiens (human). monocarboxylate transporter 4 (mct 4), 5/2000 [MASS=54022]/Monocarboxylate transporter, member of a family of proton-linked monocarboxylate transporters, may transport monocarboxylates such as lactate across the plasma membrane                                                                                                                                                                                                                                                                                 |
| GP:AC002306_1 | EDG4     | 41                | 1  | 0.92 | 0.00 | GP:AC002306_1 Homo sapiens DNA from chromosome 19-cosmid R33799, genomic sequence, complete sequence; hypothetical human G-protein coupled receptor on 19p; hypothetical human protein with BLASTX similarity to G protein-coupled receptor Rec1.3 [Mus musculus], (U4823 [MASS=39084]/Endothelial differentiation lysophosphatidic acid (LPA) G protein-coupled receptor 4, activated by saturated and unsaturated LPA, elevates intracellular Ca <sup>2+</sup> and cAMP levels, activates MAP kinase, may mediate LPA-induced tumor growth in ovarian cancer |
| SW:GBB2_HUMAN | GNB2     | 41                | 23 | 0.92 | 0.22 | SW:GBB2_HUMAN P11016 homo sapiens (human). guanine nucleotide-binding protein g(i)(g(s)/g(t) beta subunit 2 (transducin beta chain 2). 5/2000 [MASS=37331]/Guanine nucleotide binding protein beta 2, component of heterotrimeric G protein complexes that transduce signals from G protein-coupled receptors to intracellular effectors, complex with Ggamma mediates inhibition of N- and PQ-type calcium channels                                                                                                                                           |
| GP:Y18206_1   | PPP1R6   | 36                | 1  | 0.92 | 0.00 | GP:Y18206_1 Homo sapiens mRNA for protein phosphatase 1 (PPP1R6). [MASS=32559]/Protein phosphatase 1 regulatory 6, glycogen targeting subunit of protein phosphatase 1, functions in glycogen metabolism in muscle                                                                                                                                                                                                                                                                                                                                             |
| SW:TCPG_HUMAN | CCT3     | 33                | 7  | 0.92 | 0.12 | SW:TCPG_HUMAN P49368 homo sapiens (human). t-complex protein 1, gamma subunit (tcp-1-gamma) (cct-gamma). 12/1998 [MASS=60331]/Cytosolic chaperonin containing TCP-1 (CCT) gamma subunit, may act as a chaperonin and assist in the proper folding of tubulin, actin, and contractin                                                                                                                                                                                                                                                                            |
| SW:143T_HUMAN | YWHAQ    | 7, 41, 43         | 3  | 0.91 | 0.05 | SW:143T_HUMAN P27348 homo sapiens (human). 14-3-3 protein tau (14-3-3 protein theta) (14-3-3 protein t-cell) (hs1 protein). 11/1997 [MASS=27764]/14-3-3 theta (14-3-3 tau in T-cells), may modulate T-cell signaling and cytokine expression through interaction with and inhibition of protein kinase C and phosphatidylinositol 3-kinase, may promote cell survival during amyotrophic lateral sclerosis (ALS)                                                                                                                                               |
| GP:AB006534_1 | SPINT2   | 7, 41             | 1  | 0.91 | 0.00 | GP:AB006534_1 Homo sapiens mRNA for hepatocyte growth factor activator inhibitor type 2, complete cds. [MASS=28169]/Serine protease inhibitor Kunitz type 2 (bikunin), inhibits hepatocyte growth factor activator (HGFA) and serine proteases involved in coagulation and fibrinolysis, overexpressed in pancreatic cancer, may play roles in urolithiasis and glioma progression                                                                                                                                                                             |
| SW:ITA5_HUMAN | ITGA5    | 6, 41             | 2  | 0.91 | 0.03 | SW:ITA5_HUMAN P08648 homo sapiens (human). integrin alpha-5 precursor (fibronectin receptor alpha subunit) (integrin alpha-f) (vla-5) (cd49e). 7/1999 [MASS=114508]/Integrin alpha 5, acts as a receptor for fibronectin, mediates binding of the cell to the extracellular matrix, involved in cell migration and trophoblast invasion; upregulation is associated with metastatic melanomas and carcinomas                                                                                                                                                   |
| GP:U66669_1   | HIBCH    | 2, 19             | 1  | 0.91 | 0.00 | GP:U66669_1 Homo sapiens 3-hydroxyisobutyryl-coenzyme A hydrolase mRNA, complete cds. [MASS=42908]/Beta-hydroxyisobutyryl-coenzyme A hydrolase, enzyme that hydrolyzes 3-hydroxyisobutyryl CoA, an intermediate of valine catabolism                                                                                                                                                                                                                                                                                                                           |
| SW:KIME_HUMAN | MVK      | 19, 34            | 1  | 0.91 | 0.00 | SW:KIME_HUMAN Q03426 homo sapiens (human). mevalonate kinase (ec 2.7.1.36) (mk). 7/1999 [MASS=42451]/Mevalonate kinase (mevalonic aciduria), a peroxisomal enzyme involved in isoprenoid and cholesterol biosynthesis; mutations in the corresponding gene cause mevalonic aciduria, hyperimmunoglobulinemia D and periodic fever syndrome                                                                                                                                                                                                                     |
| GP:AB015798_1 | HSJ2     | 10, 33            | 1  | 0.91 | 0.00 | GP:AB015798_1 Homo sapiens HSJ2 mRNA for DnaJ homolog, complete cds; DnaJ homologue HSJ2a. [MASS=36087]/DnaJ homolog subfamily A member 1, heat shock protein, expressed in many tissues                                                                                                                                                                                                                                                                                                                                                                       |
| SW:BTF3_HUMAN | BTF3     | 29                | 1  | 0.91 | 0.00 | SW:BTF3_HUMAN P20290 homo sapiens (human). transcription factor btf3 (rna polymerase b transcription factor 3). 12/1998 [MASS=22168]/Basic transcription factor 3, a general transcription factor that forms a stable complex with RNA polymerase II and is required for transcriptional initiation by RNA polymerase II, and may be a substrate for protein kinase CK2 (CSNK2B)                                                                                                                                                                               |
| SW:TBB2_HUMAN | TUBB2    | 11                | 30 | 0.91 | 0.31 | SW:TBB2_HUMAN P05217 homo sapiens (human). tubulin beta-2 chain. 7/1999 [MASS=49831]/Tubulin beta 2, a member of the tubulin family of structural proteins that polymerizes to form microtubules, soluble form binds nuclear envelope, may serve as a marker for prostate adenocarcinoma                                                                                                                                                                                                                                                                       |
| SW:RHOG_HUMAN | ARHG     | 7, 41             | 5  | 0.90 | 0.29 | SW:RHOG_HUMAN P35238 homo sapiens (human), and cricetus cricetus (black-bellied hamster). rho-related gtp-binding protein rhog. 11/1995 [MASS=21309]/Aplysia ras-related homolog G (RhoG), a Ras-related GTP-binding protein of the rho-subfamily which regulates reorganization of the actin cytoskeleton and may be involved in the regulation of cholesterol excretion in patients with Tangier disease                                                                                                                                                     |
| SW:TCPB_HUMAN | CCT2     | 7, 33             | 5  | 0.90 | 0.26 | SW:TCPB_HUMAN P78371 homo sapiens (human). t-complex protein 1, beta subunit (tcp-1-beta) (cct-beta). 7/1999 [MASS=57488]/Chaperonin containing T-complex polypeptide-1 (TCP1) subunit 2, the beta subunit of the chaperonin containing complex (CCT), plays a role in the folding of cytosolic proteins, may be required for the proper folding of cyclin E                                                                                                                                                                                                   |
| SW:G25B_HUMAN | CDC42    | 7, 23, 34, 41, 43 | 13 | 0.90 | 0.13 | SW:G25B_HUMAN P21181 homo sapiens (human), mus musculus (mouse), and bos taurus (bovine). g25k gtp-binding protein, brain isoform (gp) (cdc42 homolog). 12/1998 [MASS=21311]/Cell division cycle 42 (GTP binding protein 25kD), Rho GTPase involved in actin cytoskeleton organization, cell migration, cell cycle progression and apoptosis, downregulated in fibroblasts and macrophages from patients with Tangiers disease                                                                                                                                 |



|               |          |                    |    |      |      |                                                                                                                                                                                                                                                                                                                                                                                                                                                            |
|---------------|----------|--------------------|----|------|------|------------------------------------------------------------------------------------------------------------------------------------------------------------------------------------------------------------------------------------------------------------------------------------------------------------------------------------------------------------------------------------------------------------------------------------------------------------|
| SW:VPP1_HUMAN | ATP6N1   | 36, 42             | 3  | 0.90 | 0.19 | SW:VPP1_HUMAN Q93050 homo sapiens (human). clathrin-coated vesicle/synaptic vesicle proton pump 116 kda subunit (ec 3.6.1.34) (vacuolar proton pump subunit 1). 12/1998 [MASS=95751]/ATPase (H+ transporting lysosomal (vacuolar proton pump) noncatalytic accessory protein 1A (110/116 kDa), a component of a multisubunit enzyme which couples ATP hydrolysis to proton translocation                                                                   |
| SW:UB5A_HUMAN | UBE2D1   | 32, 34             | 2  | 0.90 | 0.01 | SW:UB5A_HUMAN P51668 homo sapiens (human). ubiquitin-conjugating enzyme e2-17 kda 1 (ec 6.3.2.19) (ubiquitin- protein ligase) (ubiquitin carrier protein) (e2(17)kb 1). 12/1998 [MASS=16602]/Ubiquitin-conjugating enzyme E2D1, member of the ubiquitin-conjugating enzyme subfamily that catalyzes the ubiquitination of cellular proteins and marks them for degradation, acts with the ubiquitin protein ligase E6AP (UBE3A) to ubiquitinate p53 (TP53) |
| GP:AF250859_1 | MGAT1.2  | 45                 | 1  | 0.90 | 0.00 | GP:AF250859_1 Homo sapiens UDP-GlcNAc:alpha-3-D-mannoside b1,2-N-acetylglucosaminyltransferase I.2 (MGAT1.2) mRNA, partial cds; glycosyltransferase; similar to b1,2-N-acetylglucosaminyltransferase I; GnTI.2. [MASS=65499]/O-linked mannose beta1,2-N-acetylglucosaminyltransferase, has specific activity for alpha-linked terminal Man residues and is predicted to be involved in glycoprotein metabolism                                             |
| SW:ROH2_HUMAN | HNRPH2   | 45                 | 1  | 0.90 | 0.00 | SW:ROH2_HUMAN P55795 homo sapiens (human). heterogeneous nuclear ribonucleoprotein h' (hnrp h') (ftp-3). 11/1997 [MASS=49264]/Heterogeneous nuclear ribonucleoprotein H2, a putative heterogeneous nuclear ribonucleoprotein that contains three repeats that resemble the RNA recognition motif (RRM)                                                                                                                                                     |
| GP:AF004563_1 | STXBP1   | 21, 43             | 4  | 0.89 | 0.26 | GP:AF004563_1 Homo sapiens hUNC18b alternatively-spliced mRNA, complete cds; alternatively-spliced; similar to rat n-Sec1. [MASS=68736]/Syntaxin-binding protein 1, binds syntaxins, may be involved in synaptic vesicle exocytosis                                                                                                                                                                                                                        |
| GP:AF128536_1 | PACSIN2  | 11, 43             | 4  | 0.89 | 0.45 | GP:AF128536_1 Homo sapiens cytoplasmic phosphoprotein PACSIN2 mRNA, complete cds; related to PACSIN1; contains CDC15 N-terminal domain, 3 EH domain-binding NPF motifs, and a C-terminal SH3 domain. [MASS=55905]/Protein kinase C and casein kinase substrate in neurons 2, member of the PACSIN family of cytoplasmic adapter proteins, may function to organize the actin cytoskeleton and regulate vesicular traffic                                   |
| GP:AF236056_1 | GP73     | 45                 | 3  | 0.89 | 0.04 | GP:AF236056_1 Homo sapiens golgi membrane protein GP73 mRNA, complete cds. [MASS=45202]/Golgi phosphoprotein 2, an integral membrane Golgi protein that is epithelial cell-specific in healthy liver, upregulated in hepatocytes in both nonviral- and viral-associated liver disease including adult giant-cell hepatitis                                                                                                                                 |
| GP:AF284574_1 | NIT2     | 45                 | 1  | 0.89 | 0.00 | GP:AF284574_1 Homo sapiens Nit protein 2 (NIT2) mRNA, complete cds; Nit2; similar to the Nit domains of Caenorhabditis elegans NitFhit and Drosophila melanogaster NitFhit. [MASS=30608]/NIT2                                                                                                                                                                                                                                                              |
| GP:AK022868_1 | FLJ12806 | 45                 | 1  | 0.89 | 0.00 | GP:AK022868_1 Homo sapiens cDNA FLJ12806 fis, clone NT2RP2002235; unnamed protein product. [MASS=34951]/Protein of unknown function                                                                                                                                                                                                                                                                                                                        |
| PIR2:T46298   | FLJ14362 | 45                 | 1  | 0.89 | 0.00 | PIR2:T46298 hypothetical protein DKFZp4341110.1 - human (fragment) [MASS=18088]                                                                                                                                                                                                                                                                                                                                                                            |
| SW:FA5_HUMAN  | F5       | 45                 | 1  | 0.89 | 0.00 | SW:FA5_HUMAN P12259 homo sapiens (human). coagulation factor v precursor (activated protein c cofactor). 11/1997 [MASS=251701]/Coagulation factor V, a cofactor in the prothrombinase complex that plays a role in the regulation of blood coagulation; alterations of corresponding gene are associated with activated protein C (APC) resistance, parahemophilia, and thrombosis                                                                         |
| SW:SR72_HUMAN | SRP72    | 45                 | 1  | 0.89 | 0.00 | SW:SR72_HUMAN O76094 homo sapiens (human). signal recognition particle 72 kda protein (srp72). 12/1998 [MASS=74475]/Signal recognition particle 72, a ribonucleoprotein that undergoes cleavage by caspase during apoptosis; protein is an autoantigen in patients with dermatomyositis and systemic lupus erythematosus                                                                                                                                   |
| SW:VATX_HUMAN | ATP6D    | 42                 | 2  | 0.89 | 0.03 | SW:VATX_HUMAN Q02547 homo sapiens (human). vacuolar atp synthase subunit ac39 (ec 3.6.1.34) (v-atpase ac39 subunit) (32 kda accessory protein) (p39). 11/1997 [MASS=31704]/Vacuolar H+-ATPase proton pump (subunit D), an accessory subunit in the peripheral catalytic V1 complex, may be involved in coupling ATP hydrolysis (V1 complex) and proton transport (V0 complex)                                                                              |
| GP:AB002382_1 | CTNND1   | 6, 11, 41          | 18 | 0.88 | 0.31 | GP:AB002382_1 Human mRNA for KIAA0384 gene, complete cds. [MASS=104952]/Catenin delta 1, a member of the catenin family of cadherin-binding proteins that link cadherins to the cytoskeleton, acts in cell signaling, plays a role in cell migration, loss of expression is correlated with bladder, colorectal and other cancer                                                                                                                           |
| GP:AB009398_1 | PSMD13   | 32, 34             | 5  | 0.88 | 0.24 | GP:AB009398_1 Homo sapiens mRNA for 26S proteasome subunit p40.5, complete cds. [MASS=42945]/Proteasome (prosome, macropain) 26S subunit (non-ATPase, 13), a subunit of the PA700 regulatory complex of the 26S proteasome                                                                                                                                                                                                                                 |
| PIR2:T46412   | NEDD4    | 26, 29, 32, 34, 42 | 1  | 0.88 | 0.00 | PIR2:T46412 ubiquitin--protein ligase (EC 6.3.2.19) NEDD4 - human (fragment) [MASS=95283]/Neural cell precursor expressed developmentally downregulated 4, ubiquitin-protein ligase with multiple WW domains, binds to and reduces the activity of epithelial sodium channels, may play a role in neural differentiation, regulated by kinase SGK                                                                                                          |
| GP:AF044670_1 | VAP33    | 21, 31, 43         | 2  | 0.88 | 0.24 | GP:AF044670_1 Homo sapiens 33 kDa Vamp-associated protein (VAP33) mRNA, complete cds; VAP-33. [MASS=27318]/Vesicle-associated membrane protein (VAMP)-associated protein A, binds v-SNAREs, t-SNAREs, VAPB, and VAMP, predicted to be involved in vesicle transport and fusion                                                                                                                                                                             |
| PIR2:B55053   | SCYE1    | 2, 35, 41          | 9  | 0.88 | 0.07 | PIR2:B55053 endothelial monocyte-activating protein II precursor - human [MASS=34254]/Endothelial monocyte activating polypeptide II, a proinflammatory cytokine that interacts with ATP synthase and inhibits endothelial cell growth, released during apoptosis, may sensitize tumors to killing by tumor necrosis factor alpha (TNF)                                                                                                                    |
| GP:AB037856_1 | FENS-1   | 45                 | 3  | 0.88 | 0.16 | GP:AB037856_1 Homo sapiens mRNA for KIAA1435 protein, partial cds; Start codon is not identified.. [MASS=46908]/Protein containing two FYVE zinc finger domains, which bind phosphatidylinositol 3-phosphate, and 12 WD domains (WD-40 repeats), has a region of low similarity to a region of F-box/WD-repeat protein (C. elegans LIN-23), which regulates cell proliferation                                                                             |
| GP:AK022499_1 | FLJ00365 | 45                 | 1  | 0.88 | 0.00 | GP:AK022499_1 Homo sapiens cDNA FLJ12437 fis, clone NT2RM1000118, weakly similar to CALCINEURIN B SUBUNIT; unnamed protein product. [MASS=26041]                                                                                                                                                                                                                                                                                                           |

|               |        |            |    |      |      |                                                                                                                                                                                                                                                                                                                                                                                                                                                                       |
|---------------|--------|------------|----|------|------|-----------------------------------------------------------------------------------------------------------------------------------------------------------------------------------------------------------------------------------------------------------------------------------------------------------------------------------------------------------------------------------------------------------------------------------------------------------------------|
| SW:EF1D_HUMAN | EEF1D  | 45         | 2  | 0.88 | 0.01 | SW:EF1D_HUMAN P29692 homo sapiens (human). elongation factor 1-delta (ef-1-delta). 6/1994 [MASS=31221]/Eukaryotic translation elongation factor 1 delta, a guanine nucleotide exchange protein that gets hyperphosphorylated in cells infected with herpesviruses, binds HIV-1 protein Tat and causes a reduction of host mRNA translation efficiency                                                                                                                 |
| GP:AF087020_1 | PZR    | 41         | 12 | 0.88 | 0.08 | GP:AF087020_1 Homo sapiens protein zero related protein (PZR) mRNA, complete cds; immunoglobulin superfamily member. [MASS=29082]/Myelin protein zero-like 1, a member of the immunoglobulin superfamily that is a concanavalin A (ConA) receptor, mediates ConA and c-Src (SRC) signaling, may be a plasma membrane anchor for SHP-2 (PTPN11) type I, contains two ITIM motifs                                                                                       |
| SW:RL8_HUMAN  | RPL8   | 35         | 4  | 0.88 | 0.57 | SW:RL8_HUMAN P25120 homo sapiens (human), rattus norvegicus (rat), and mus musculus (mouse). 60s ribosomal protein l8. 5/2000 [MASS=28025]/Ribosomal protein L8, putative component of the large 60S ribosomal subunit                                                                                                                                                                                                                                                |
| GP:D38048_1   | PSMB7  | 32         | 1  | 0.88 | 0.00 | GP:D38048_1 Human mRNA for proteasome subunit z, complete cds. [MASS=29965]/Proteasome (prosome, macropain) subunit beta 7, a subunit of the 26S proteasome, replaced by PSMB10 upon interferon gamma (IFNG) stimulation                                                                                                                                                                                                                                              |
| SW:PRC8_HUMAN | PSMA3  | 32         | 2  | 0.88 | 0.06 | SW:PRC8_HUMAN P25788 homo sapiens (human). proteasome component c8 (ec 3.4.99.46) (macropain subunit c8) (multicatalytic endopeptidase complex subunit c8). 12/1998 [MASS=28302]/Proteasome subunit alpha type 3, the C8 subunit of the 20S core proteasome, which is a multicatalytic proteinase complex involved in cellular protein degradation; expression is increased in skeletal muscle of slim AIDS patients                                                  |
| SW:KCRB_HUMAN | CKB    | 18         | 3  | 0.88 | 0.26 | SW:KCRB_HUMAN P12277 homo sapiens (human). creatine kinase, b chain (ec 2.7.3.2) (b-ck). 7/1999 [MASS=42644]/Brain creatine kinase, involved in energy homeostasis, expression is elevated in some forms of cancer; CK-MB is a dimer of subunits CKM and CKB, and is an important serum marker for acute myocardial infarction                                                                                                                                        |
| SW:ANX7_HUMAN | ANXA7  | 21, 42     | 4  | 0.87 | 0.02 | SW:ANX7_HUMAN P20073 homo sapiens (human). annexin vii (synexin). 5/2000 [MASS=50316]/Annexin A7 (synexin), a calcium-dependent GTPase that acts as a voltage-dependent calcium channel, interaction with galectin 3 (LGALS3) suggests roles in apoptosis and exocytosis, may function as a tumor suppressor                                                                                                                                                          |
| SW:SYM_HUMAN  | MARS   | 2, 35, 37  | 9  | 0.87 | 0.18 | SW:SYM_HUMAN P56192 homo sapiens (human). methionyl-trna synthetase (ec 6.1.1.10) (methionine--trna ligase) (metrs). 12/1998 [MASS=101129]/Methionine-tRNA synthetase, putative tRNA synthetase that is predicted to aminoacylate its cognate tRNAs with methionine for protein biosynthesis. required for rRNA synthesis in the nucleolus                                                                                                                            |
| PIR2:T08753   | E46L   | 45         | 2  | 0.87 | 0.13 | PIR2:T08753 hypothetical protein DKFZp586H2219.1 - human [MASS=53489]/Protein of unknown function, has strong similarity to uncharacterized rat Sca10                                                                                                                                                                                                                                                                                                                 |
| GP:AF124145_1 | AMFR   | 41         | 1  | 0.87 | 0.00 | GP:AF124145_1 Homo sapiens autocrine motility factor receptor (AMFR) mRNA, complete cds. [MASS=73022]/Autocrine motility factor receptor, a cell surface transmembrane glycoprotein involved in cell motility signaling and metastasis, acts as a ubiquitin ligase involved in protein degradation, associated with tumor progression in various carcinomas                                                                                                           |
| SW:SERC_HUMAN | PSA    | 2          | 2  | 0.87 | 0.15 | SW:SERC_HUMAN Q9y617 homo sapiens (human). phosphoserine aminotransferase (ec 2.6.1.52) (psat). 5/2000 [MASS=35189]/Member of the aminotransferases class-V family of pyridoxal-phosphate-dependent enzymes, has moderate similarity to S. cerevisiae Ser1p, which is a 3-phosphoserine transaminase involved in synthesis of serine from 3-phosphoglycerate                                                                                                          |
| SW:GPS1_HUMAN | GPS1   | 7, 34, 41  | 4  | 0.86 | 0.12 | SW:GPS1_HUMAN Q13098 homo sapiens (human). g protein pathway suppressor 1 (gps1 protein) (mfh protein). 11/1997 [MASS=53372]/G protein pathway suppressor 1, suppressor of G protein and MAP kinase-mediated signaling pathways                                                                                                                                                                                                                                       |
| SW:ENOB_HUMAN | ENO3   | 5, 18      | 4  | 0.86 | 0.13 | SW:ENOB_HUMAN P13929 homo sapiens (human). beta enolase (ec 4.2.1.11) (2-phospho-d-glycerate hydro-lyase) (skeletal muscle enolase) (mse). 7/1998 [MASS=46856]/Enolase 3 (muscle-specific enolase, beta enolase), a putative enolase which catalyzes the conversion of 2-phospho-D-glycerate to phosphoenolpyruvate in muscle glycolysis, deficiency is associated with exercise intolerance and myalgias                                                             |
| SW:MPRI_HUMAN | IGF2R  | 36, 41, 43 | 76 | 0.86 | 0.21 | SW:MPRI_HUMAN P11717 homo sapiens (human). cation-independent mannose-6-phosphate receptor precursor (ci man-6-p receptor) (ci-mpr) (insulin-like growth factor ii receptor) (300 kda mannose 6-phosphate [MASS=274309]/Insulin-like growth factor II receptor, functions in transport of mannose 6-phosphate-containing lysosomal enzymes and IGF-II maturation and clearance, mediates granzyme B-induced apoptosis, putative tumor suppressor                      |
| SW:HIP_HUMAN  | ST13   | 29, 33     | 5  | 0.86 | 0.10 | SW:HIP_HUMAN P50502 homo sapiens (human). hsc70-interacting protein (progesterone receptor-associated p48 protein) (putative tumor suppressor st13). 5/2000 [MASS=41332]/Suppression of tumorigenicity 13 (Hsp70-interacting protein), acts as an Hsc70 cochaperone, contains tetratricopeptide repeats, participates in protein complex assembly, heat shock response, and lysosomal transport; downregulated in colorectal carcinoma                                |
| SW:DNJ2_HUMAN | DNAJA1 | 10, 33     | 1  | 0.86 | 0.00 | SW:DNJ2_HUMAN P31689 homo sapiens (human). dnaj protein homolog 2 (hsj-2). 7/1999 [MASS=44868]/DnaJ homolog subfamily A member 1, heat shock protein, expressed in many tissues                                                                                                                                                                                                                                                                                       |
| SW:ADB_HUMAN  | AP2B1  | 43         | 5  | 0.86 | 0.14 | SW:ADB_HUMAN P21851 homo sapiens (human), rattus norvegicus (rat), and bos taurus (bovine). beta-adaptin (plasma membrane adaptor ha2/ap2 adaptin beta subunit) (clathrin assembly protein complex 2 beta [MASS=104553]/Adaptor-related protein complex 2 beta 1 subunit, a large subunit of the AP2 adaptor complex, involved in clathrin coat assembly at the plasma membrane; may bind to the transmembrane envelope protein of HIV-1 and HTLV retroviruses        |
| PIR1:I38908   | DDB1   | 14         | 2  | 0.86 | 0.03 | SW:DDB1_HUMAN Q16531 h dna damage binding protein 1 (damage-specific dna binding protein 1) (ddb p127 subunit) (ddba) (uv-damaged dna-binding protein 1) (uv-ddb 1) (xeroderma pigmentosum group e complem [MASS=126968]/Damage-specific DNA-binding protein 1, larger subunit of a complex that recognizes and binds damaged DNA and stimulates repair, not essential for DNA repair; deficiencies are associated with xeroderma pigmentosum complementation group E |

|               |          |            |    |      |      |                                                                                                                                                                                                                                                                                                                                                                                                                                                                 |
|---------------|----------|------------|----|------|------|-----------------------------------------------------------------------------------------------------------------------------------------------------------------------------------------------------------------------------------------------------------------------------------------------------------------------------------------------------------------------------------------------------------------------------------------------------------------|
| GP:AF144074_1 | G2AN     | 5          | 3  | 0.86 | 0.05 | GP:AF144074_1 Homo sapiens glucosidase II alpha subunit mRNA, complete cds; similar to sequences encoded by GenBank Accession Numbers D42041 and U92793. [MASS=109438]/Alpha glucosidase II (alpha neutral subunit), trims alpha(1,3)-linked glucose from Glc(3)Man(9)GlcNAc(2) structures, localizes to the endoplasmic                                                                                                                                        |
| SW:G3P2_HUMAN | GAPD     | 5, 14, 18  | 2  | 0.85 | 0.01 | SW:G3P2_HUMAN P04406 homo sapiens (human). glyceraldehyde 3-phosphate dehydrogenase, liver (ec 1.2.1.12). 7/1999 [MASS=35922]/Glyceraldehyde-3-phosphate dehydrogenase, catalyzes reversible oxidation and phosphorylation of glyceraldehyde-3-phosphate to 1,3-diphosphoglycerate in glycolysis, involved in apoptosis, may play a role in neurodegeneration in diseases like Alzheimer's                                                                      |
| SW:KPC1_HUMAN | PRKCB1   | 34, 41     | 1  | 0.85 | 0.00 | SW:KPC1_HUMAN P05771 homo sapiens (human). protein kinase c, beta-i type (ec 2.7.1.-) (pkc-beta-1). 7/1999 [MASS=76839]/Protein kinase C beta 1, conventional PKC expressed as beta I and beta II forms, beta II mediates G2/M phase transition, mitotic nuclear envelope breakdown, neutrophil NADPH oxidase assembly; rat Prkcb1 activity is enhanced in diabetes mellitus                                                                                    |
| GP:U45976_1   | PICALM   | 31, 43     | 1  | 0.85 | 0.00 | GP:U45976_1 Human clathrin assembly protein lymphoid myeloid leukemia (CALM) mRNA, complete cds. [MASS=70695]/Phosphatidylinositol binding clathrin assembly protein, binds to clathrin heavy chain (CLTC) and plays a role in coated pit internalization; rearrangements in the corresponding gene are associated with acute lymphoblastic and acute myeloid leukemias                                                                                         |
| SWN:P23_HUMAN | p23      | 19, 41     | 2  | 0.85 | 0.01 | SWN:P23_HUMAN Q15185 homo sapiens (human). telomerase-binding protein p23 (hsp90 co-chaperone) (progesterone receptor complex p23). 8/2001 [MASS=18697]/Inactive progesterone receptor (23kD), cochaperone with prostaglandin E synthase activity that is a component of the unstimulated progesterone receptor complex and that enhances receptor complex formation through interactions with Hsp90 (HSPCA)                                                    |
| SW:ABP2_HUMAN | FLNA     | 11, 41     | 11 | 0.85 | 0.11 | SW:ABP2_HUMAN P21333 homo sapiens (human). endothelial actin-binding protein (abp-280) (nonmuscle filamin) (filamin 1). 11/1997 [MASS=280761]/Filamin A (alpha), an actin crosslinking phosphoprotein involved in actin cytoskeletal organization, signal transduction, and mechanical stimulus response, may contribute to cell adhesion; genetic mutations are associated with periventricular heterotopia                                                    |
| GP:AB037807_1 | KIAA1386 | 45         | 1  | 0.85 | 0.00 | GP:AB037807_1 Homo sapiens mRNA for KIAA1386 protein, partial cds; Start codon is not identified.. [MASS=135444]/Protein containing ankyrin repeats, an IBR domain, which are found in zinc finger proteins, and a C3HC4 type (RING) zinc finger, which may mediate protein-protein interactions                                                                                                                                                                |
| SW:PRC2_HUMAN | PSMA1    | 32         | 4  | 0.85 | 0.05 | SW:PRC2_HUMAN P25786 homo sapiens (human). proteasome component c2 (ec 3.4.99.46) (macropain subunit c2) (proteasome nu chain) (multicatalytic endopeptidase complex subunit c2) (30 kda prosomal protein) [MASS=29556]/Alpha type 1 proteasome (prosome, macropain) subunit , a component of a multicatalytic proteinase complex that is involved in cellular protein degradation                                                                              |
| SW:G6PI_HUMAN | GPI      | 5          | 2  | 0.85 | 0.01 | SW:G6PI_HUMAN P06744 homo sapiens (human). glucose-6-phosphate isomerase (gpi) (ec 5.3.1.9) (phosphoglucose isomerase) (pgi) (phosphohexose isomerase) (phi) (neuroleukin) (nlk). 5/2000 [MASS=63189]/Glucose phosphate isomerase, plays a role in glycolysis and gluconeogenesis, tumor-secreted form (neuroleukin) acts as an autocrine factor to stimulate motility, invasion and metastasis of cancer cells; deficiency is associated with hemolytic anemia |
| SW:CALX_HUMAN | CANX     | 33, 36, 43 | 4  | 0.84 | 0.04 | SW:CALX_HUMAN P27824 homo sapiens (human). calnexin precursor (major histocompatibility complex class i antigen-binding protein p88) (p90) (ip90). 11/1995 [MASS=67568]/Calnexin, a calcium and lectin binding protein that functions as a chaperone in the endoplasmic reticulum, involved in protein folding and secretion, mediates retention of misfolded proteins in the endoplasmic reticulum                                                             |
| SW:ER53_HUMAN | LMAN1    | 33, 36, 43 | 2  | 0.84 | 0.00 | SW:ER53_HUMAN P49257 homo sapiens (human). ergic-53 protein precursor (er-golgi intermediate compartment 53 kda protein) (gp58) (mr60) (lectin, mannose-binding 1). 7/1998 [MASS=57563]/Mannose-binding lectin 1, involved in the traffic of glycoproteins between endoplasmic reticulum and the Golgi apparatus; mutations of the corresponding gene is associated with combined factor V and VIII coagulation deficiency                                      |
| SW:SYR_HUMAN  | RARS     | 2, 35, 37  | 7  | 0.84 | 0.08 | SW:SYR_HUMAN P54136 homo sapiens (human). arginyl-trna synthetase (ec 6.1.1.19) (arginine--trna ligase) (argrs). 5/2000 [MASS=74977]/Arginyl-tRNA synthetase, aminoacylates its cognate tRNAs with arginine for protein biosynthesis                                                                                                                                                                                                                            |
| GP:AF068297_1 | HDCMD45P | 45         | 2  | 0.84 | 0.14 | GP:AF068297_1 Homo sapiens HDCMD45P mRNA, partial cds. [MASS=17895]                                                                                                                                                                                                                                                                                                                                                                                             |
| PIR2:JC6524   | PSMD11   | 32         | 3  | 0.84 | 0.08 | PIR2:JC6524 26S proteasome regulatory complex chain p44.5 - human [MASS=47464]/Subunit 9 of the 26S proteasome (proteasome 26S subunit non-ATPase 11), a non-ATPase subunit of the 19S regulatory unit of the 26S proteasome complex, confers ATP dependency to the 26S proteasome, which mediates ubiquitin-dependent protein degradation                                                                                                                      |
| SW:ENPL_HUMAN | TRA1     | 10         | 5  | 0.84 | 0.11 | SW:ENPL_HUMAN P14625 homo sapiens (human). endoplasmic precursor (94 kda glucose-regulated protein) (grp94) (gp96 homolog) (tumor rejection antigen 1). 10/1996 [MASS=92469]/Tumor rejection antigen 1, a putative molecular chaperone that may play roles in protein folding, cytoprotection, the immune response, and the heat shock and stress responses; vaccination with TRA1 elicits immune responses to cancer                                           |
| GP:U59435_1   | PA2G4    | 7          | 7  | 0.84 | 0.18 | GP:U59435_1 Human cell cycle protein p38-2G4 homolog (hG4-1) mRNA, complete cds. [MASS=43813]/Proliferation associated 2G4, interacts with the juxtamembrane domain of ERBB3, dissociates from ERBB3 and translocates from the cytoplasm to the nucleus following treatment with heregulin                                                                                                                                                                      |
| GP:AB002323_1 | DNCH1    | 7, 23      | 8  | 0.83 | 0.29 | GP:AB002323_1 Human mRNA for KIAA0325 gene, partial cds. [MASS=238445]/Dynein cytoplasmic heavy chain 1, a member of a family of dynein ATPases that function as motor proteins, plays a role in mitotic spindle formation                                                                                                                                                                                                                                      |
| PIR2:T03842   | SKB1     | 7, 23      | 5  | 0.83 | 0.18 | PIR2:T03842 fission yeast Skb1 protein homolog - human [MASS=72786]/Protein arginine methyltransferase 5, methylates target proteins on arginine residues, may inhibit mitosis                                                                                                                                                                                                                                                                                  |
| SW:ITA6_HUMAN | ITGA6    | 6, 41      | 3  | 0.83 | 0.04 | SW:ITA6_HUMAN P23229 homo sapiens (human). integrin alpha-6 precursor (via-6) (cd49f). 5/2000 [MASS=119462]/Integrin alpha 6, a laminin receptor and component of hemidesmosomes, participates in the maintenance of epidermal integrity; gene mutations are responsible for epidermolysis bullosa and overexpression is correlated with carcinoma invasiveness                                                                                                 |

|                |            |               |   |      |      |                                                                                                                                                                                                                                                                                                                                                                                                                                                                                                 |
|----------------|------------|---------------|---|------|------|-------------------------------------------------------------------------------------------------------------------------------------------------------------------------------------------------------------------------------------------------------------------------------------------------------------------------------------------------------------------------------------------------------------------------------------------------------------------------------------------------|
| SW:SRC_HUMAN   | SRC        | 34, 41        | 1 | 0.83 | 0.00 | SW:SRC_HUMAN P12931 homo sapiens (human). proto-oncogene tyrosine-protein kinase src (ec 2.7.1.112) (p60-src) (c-src). 5/2000 [MASS=59704]/V-src avian sarcoma viral oncogene homolog (Schmidt-Ruppin A-2), tyrosine kinase involved in cell proliferation, cell adhesion, and cytoskeletal organization, implicated in the progression of colon cancer and certain breast tumors                                                                                                               |
| SWN:ENT1_HUMAN | ENT1       | 25, 42        | 1 | 0.83 | 0.00 | SWN:ENT1_HUMAN Q99808 homo sapiens (human). equilibrative nucleoside transporter 1 (equilibrative nitrobenzylmercaptapurine riboside-sensitive nucleoside transporter) (equilibrative nbmpr-sensitive nucleoside transporter) (equilibrative nucleoside transporter) (equilibrative nucleoside carrier family 29 member 1), functions in the transport of physiologic nucleosides and chemotherapeutic nucleoside analog drugs, inhibited by nitrobenzylthioinosine, dipyrindamole, and dilazep |
| SW:SYA_HUMAN   | AARS       | 2, 25, 35, 37 | 1 | 0.83 | 0.00 | SW:SYA_HUMAN P49588 homo sapiens (human). alanyl-trna synthetase (ec 6.1.1.7) (alanine--trna ligase) (alars). 7/1998 [MASS=106801]/Alanyl-tRNA synthetase, aminoacylates its cognate tRNA with alanine for protein biosynthesis, acts as an autoantigen in patients with polymyositis                                                                                                                                                                                                           |
| GP:AF293335_1  | KIAA1967   | 45            | 2 | 0.83 | 0.01 | GP:AF293335_1 Homo sapiens p30 DBC mRNA, complete cds; putative protein from MH0802201. [MASS=30451]                                                                                                                                                                                                                                                                                                                                                                                            |
| GP:AK000303_1  | FLJ20296   | 45            | 3 | 0.83 | 0.03 | GP:AK000303_1 Homo sapiens cDNA FLJ20296 fis, clone HEP05890; unnamed protein product. [MASS=36853]/Protein of unknown function                                                                                                                                                                                                                                                                                                                                                                 |
| GPN:AF193795_1 | VPS29      | 45            | 2 | 0.83 | 0.04 | PIR2:JC7515 vesicle protein sorting 29 protein - human [MASS=20506]/Vacuolar sorting protein 29, putative transporter that may play a role in retrograde transport from endosomes to the trans-Golgi network                                                                                                                                                                                                                                                                                    |
| PIR2:T46292    | BAG3       | 45            | 1 | 0.83 | 0.00 | PIR2:T46292 hypothetical protein DKFZp434E0610.1 - human (fragment) [MASS=65841]/BCL2-associated athanogene 3, interacts with the Hsc70 ATPase domain to regulate its chaperone activity, interacts with BCL2 to modulate cellular antiapoptosis, and participates in the EGF signaling pathway                                                                                                                                                                                                 |
| GP:D31886_1    | RAB3GAP    | 43            | 3 | 0.83 | 0.11 | GP:D31886_1 Human mRNA for KIAA0066 gene, partial cds. [MASS=110524]/RAB3 GTPase-activating protein, GTPase-activating protein specific for lipid-modified members of the Rab3 subfamily, may influence calcium-dependent exocytosis of synaptic vesicles                                                                                                                                                                                                                                       |
| SW:DRS1_HUMAN  | PECI       | 19            | 9 | 0.83 | 0.22 | SW:DRS1_HUMAN O75521 homo sapiens (human). dbi-related protein 1 (drs-1). 5/2000 [MASS=40151]/Peroxisomal D3,D2-enoyl-CoA isomerase, catalyzes the isomerization of 3-cis-octenoyl-CoA to 2-trans-octenoyl-CoAm, a step in the beta oxidation of fatty acids in peroxisomes                                                                                                                                                                                                                     |
| SW:ITMA_HUMAN  | ITM2A      | 16            | 1 | 0.83 | 0.00 | SW:ITMA_HUMAN O43736 homo sapiens (human). integral membrane protein 2a (e25 protein). 5/2000 [MASS=29741]/Integral membrane protein 2, a putative type II integral membrane protein with a leucine zipper motif                                                                                                                                                                                                                                                                                |
| SW:SC13_HUMAN  | SEC13L1    | 45            | 3 | 0.82 | 0.02 | SW:SC13_HUMAN P55735 homo sapiens (human). sec13-related protein. 7/1998 [MASS=35569]/SEC13 (S. cerevisiae)-like 1, a serine- and threonine-rich WD40 repeat-containing protein that plays a role in protein transport from the endoplasmic reticulum to the Golgi                                                                                                                                                                                                                              |
| GP:U70735_1    | MOV34-34KD | 41            | 1 | 0.82 | 0.00 | GP:U70735_1 Homo sapiens 34 kDa Mov34 homolog mRNA, complete cds; similar to Mov34. [MASS=33576]/COP9 subunit 6, putative translation initiation factor and a subunit of COP9 signalosome, which mediates p53 (human TP53) degradation, may be involved in G2-M phase transition of cell cycle                                                                                                                                                                                                  |
| SW:BASI_HUMAN  | BSG        | 41            | 2 | 0.82 | 0.00 | SW:BASI_HUMAN P35613 homo sapiens (human). basigin precursor (leukocyte activation antigen m6) (collagenase stimulatory factor) (extracellular matrix metalloproteinase inducer) (emmprin) (5f7) (cd147 an [MASS=29221]/Basigin (OK blood group), a cyclophilin receptor of the immunoglobulin family, enhances cancer progression by increasing the production and activation of MMP2 and enhances infectivity of HIV 1 virions                                                                |
| SW:PRC5_HUMAN  | PSC5       | 32            | 2 | 0.82 | 0.03 | SW:PRC5_HUMAN P20618 homo sapiens (human). proteasome component c5 (ec 3.4.99.46) (macropain subunit c5) (proteasome gamma chain) (multicatalytic endopeptidase complex subunit c5). 11/1997 [MASS=26489]/Proteasome subunit alpha type 5 (ZETA), component of the 20S catalytic core proteasome that is involved in cellular protein degradation, has ribonuclease activity                                                                                                                    |
| PIR2:S71460    | PRPS1      | 25            | 2 | 0.82 | 0.12 | PIR2:S71460 ribose-phosphate pyrophosphokinase (EC 2.7.6.1) 39K regulatory chain - human [MASS=39480]/Phosphoribosyl pyrophosphate (PRPP) synthetase 1, generates PRPP, which is required for de novo purine and pyrimidine biosynthesis; mutations causing superactivity are associated with gout and neurological impairment                                                                                                                                                                  |
| SW:ARS1_HUMAN  | ASNA1      | 24            | 1 | 0.82 | 0.00 | SW:ARS1_HUMAN O43681 homo sapiens (human). arsenical pump-driving atpase (ec 3.6.1.-) (arsenite-translocating atpase) (arsenical resistance atpase) (arsa) (asna-i). 5/2000 [MASS=38793]/Arsenite transporter ATP-binding homolog 1, a soluble putative arsenite transporter with similarity to bacterial arsA that has ATPase activity, may function in nucleocytoplasmic transport of a nucleolar component, and is stimulated by arsenite                                                    |
| SW:LCB2_HUMAN  | SPTLC2     | 19            | 1 | 0.82 | 0.00 | SW:LCB2_HUMAN O15270 homo sapiens (human). serine palmitoyltransferase 2 (ec 2.3.1.50) (long chain base biosynthesis protein 2) (lcb 2) (serine-palmitoyl-coa transferase 2) (spt 2) (kiaa0526). 5/2000 [MASS=62924]/Serine palmitoyltransferase long chain base subunit 2, member of the aminolevulinate synthase superfamily, catalyzes the first step in ceramide formation, involved in epidermal cell response to UV exposure and in leukemia cell ectopside-induced apoptosis             |
| SW:DYN2_HUMAN  | DNM2       | 7, 23, 43     | 1 | 0.81 | 0.00 | SW:DYN2_HUMAN P50570 homo sapiens (human). dynamin 2. 10/1996 [MASS=98018]/Dynamin II, member of a family of 100-kD guanosine triphosphatases, regulates budding of endocytic vesicles at the plasma membrane and may function in the formation of transport vesicles at the trans-Golgi                                                                                                                                                                                                        |
| SW:Y253_HUMAN  | NCSTN      | 32, 41        | 2 | 0.81 | 0.05 | SW:Y253_HUMAN Q92542 homo sapiens (human). hypothetical protein kiaa0253 (fragment). 7/1998 [MASS=78280]/Nicastrin, a transmembrane glycoprotein that may be required for the assembly and transport of presenilin complex that processes amyloid precursor protein (APP), may play a role in notch signaling and abnormal APP processing in Alzheimer disease                                                                                                                                  |

|                |                         |               |    |      |      |                                                                                                                                                                                                                                                                                                                                                                                                                  |
|----------------|-------------------------|---------------|----|------|------|------------------------------------------------------------------------------------------------------------------------------------------------------------------------------------------------------------------------------------------------------------------------------------------------------------------------------------------------------------------------------------------------------------------|
| GP:AC003956_1  | Acetolactate synthase   | 45            | 5  | 0.81 | 0.28 | GP:AC003956_1 Homo sapiens DNA from chromosome 19, cosmid R34078, complete sequence; human homolog of acetolactate synthase; DPS similarity to Accession: gi 1730288 (U61263) acetolactate synthase homolog [Homo sapiens. [MASS=67868]                                                                                                                                                                          |
| GP:U06631_1    | H326                    | 45            | 2  | 0.81 | 0.07 | GP:U06631_1 Human (H326) mRNA, complete cds; homologous to mouse gene PC326:GenBank Accession Number M95564. [MASS=66385]/Protein containing seven WD domains (WD-40 repeats), which may mediate protein-protein interactions, has a region of low similarity to a region of breakpoint cluster region protein uterine leiomyoma 2 (human BCRP2), which may have a housekeeping function                         |
| SW:ME18_HUMAN  | ZNF144                  | 45            | 1  | 0.81 | 0.00 | SW:ME18_HUMAN P35227 homo sapiens (human). dna-binding protein mel-18 (zinc finger protein 144). 11/1995 [MASS=37788]/Zinc finger protein 144, member of the Drosophila polycomb gene group, contains a helix-loop-helix like structure and a proline and serine-rich region, putative transcription factor that may be involved in hematopoiesis                                                                |
| GP:AJ131245_1  | SEC24B                  | 43            | 1  | 0.81 | 0.00 | GP:AJ131245_1 Homo sapiens mRNA for Sec24 protein (Sec24B isoform). [MASS=137789]/SEC24 related gene family member B, a member of the SEC24 family of vesicle trafficking proteins, interacts with SEC23A, predicted to be localized to COPII-coated vesicles and to be involved in the export of proteins from the endoplasmic reticulum                                                                        |
| SW:PRSC_HUMAN  | PSMD7                   | 32            | 2  | 0.81 | 0.00 | SW:PRSC_HUMAN P51665 homo sapiens (human). 26s proteasome regulatory subunit s12 (proteasome subunit p40) (mov34 protein). 11/1997 [MASS=37060]/Proteasome (prosome, macropain) 26S subunit non-ATPase 7, a putative regulatory subunit of the 26S proteasome; mutation of the mouse Psdm7 gene results in recessive embryonic lethality                                                                         |
| SW:PSD1_HUMAN  | PSMD1                   | 32            | 11 | 0.81 | 0.20 | SW:PSD1_HUMAN Q99460 homo sapiens (human). 26s proteasome regulatory subunit s1 (p112). 12/1998 [MASS=105866]/Proteasome (prosome, macropain) 26S subunit (non-ATPase, 1), a regulatory subunit of the 26S proteasome                                                                                                                                                                                            |
| SW:AMD2_HUMAN  | AMPD2                   | 25            | 1  | 0.81 | 0.00 | SW:AMD2_HUMAN Q01433 homo sapiens (human). amp deaminase 2 (ec 3.5.4.6) (amp deaminase isoform I). 11/1997 [MASS=88198]/Adenosine monophosphate deaminase 2 (isoform L), catalyzes the deamination of adenosine monophosphate to form inosine monophosphate in purine nucleotide metabolism                                                                                                                      |
| SW:LCFA_HUMAN  | FACL1                   | 19            | 14 | 0.81 | 0.13 | SW:LCFA_HUMAN P41215 homo sapiens (human). long-chain-fatty-acid-coa ligase 1 (ec 6.2.1.3) (long-chain acyl-coa synthetase 1) (lacs 1) (palmitoyl-coa ligase). 10/1996 [MASS=78348]/Long chain fatty acid-Coenzyme A ligase (palmitoyl-CoA ligase), a member of the long chain acyl-CoA synthetase family required for lipid synthesis and fatty acid degradation                                                |
| SW:EZRI_HUMAN  | VIL2                    | 6, 11, 36     | 1  | 0.80 | 0.00 | SW:EZRI_HUMAN P15311 homo sapiens (human). ezrin (p81) (cytovillin) (villin-2). 12/1998 [MASS=69268]/Villin 2 (ezrin), a member of the band 4.1 superfamily, links the cytoskeleton to the plasma membrane and thereby regulates cell adhesion and cortical morphogenesis, may play a role in rheumatoid arthritis and retinal degeneration                                                                      |
| GP:AF151867_1  | INTEGRAL TYPE I PROTEIN | 45            | 2  | 0.80 | 0.07 | GP:AF151867_1 Homo sapiens CGI-109 protein mRNA, complete cds. [MASS=24354                                                                                                                                                                                                                                                                                                                                       |
| GPN:AB041832_1 | WBP11                   | 45            | 1  | 0.80 | 0.00 | 1 Homo sapiens mRNA for nuclear protein containing a WW domain (Npw38), complete cds. [MASS=30472]/Npw38-binding protein, interacts with the WW domain of Npw38 (PQBP1), binds poly(rG) and G-rich single-stranded DNA, interacts with nuclear or perinuclear filaments and may play a role in regulation of pre-mRNA processing                                                                                 |
| SW:PSD2_HUMAN  | PSMD2                   | 32            | 1  | 0.80 | 0.00 | SW:PSD2_HUMAN Q13200 homo sapiens (human). 26s proteasome regulatory subunit s2 (p97) (tumor necrosis factor type 1 receptor associated protein 2) (55.11 protein). 7/1999 [MASS=100200]/Proteasome 26S non-ATPase subunit 2, a subunit of the 26S proteasome, likely involved in ubiquitin-dependent proteolysis, binds the type 1 tumor necrosis factor receptor (TNFRSF1A) and may function in TNFR signaling |
| SW:PUR8_HUMAN  | ADSL                    | 25            | 2  | 0.80 | 0.00 | SW:PUR8_HUMAN P30566 homo sapiens (human). adenylosuccinate lyase (ec 4.3.2.2) (adenylosuccinase) (asl) (asase). 5/2000 [MASS=54889]/Adenylosuccinate lyase, catalyzes two steps in adenosine monophosphate biosynthesis; deficiency is associated with psychomotor retardation, epilepsy, and autism                                                                                                            |
| SW:CTNB_HUMAN  | CTNNB1                  | 6, 11, 29, 41 | 19 | 0.79 | 0.26 | SW:CTNB_HUMAN P35222 homo sapiens (human). beta-catenin. 2/1996 [MASS=85497]/Beta catenin, links cadherins to the cytoskeleton, may act as a component of the Wnt signal transduction pathway transmitting nuclear signals via a complex with LEF1 and TCF transcription factors; mutations in the gene are associated with various cancers                                                                      |
| SW:CC4H_HUMAN  | LRBA                    | 45            | 1  | 0.79 | 0.00 | SW:CC4H_HUMAN P50851 homo sapiens (human). cdc4-like protein (fragment). 7/1998 [MASS=213599]/Lipopolysaccharide-responsive and beige-like anchor, a putative protein-binding protein that contains WD-like repeats and a BEACH (BEige And CHS) domain, may play a role in vesicle transport                                                                                                                     |
| SW:G100_HUMAN  | ADRM1                   | 45            | 4  | 0.79 | 0.06 | SW:G100_HUMAN Q16186 homo sapiens (human). 110 kDa cell membrane glycoprotein. 11/1997 [MASS=42167]/Cell membrane glycoprotein 110 kDa, putative integral plasma membrane glycoprotein, putative tumor antigen and is expressed on human gastric carcinoma cells; upregulated in response to IFNgamma (IFNG)                                                                                                     |
| SW:LMO6_HUMAN  | LMO6                    | 45            | 1  | 0.79 | 0.00 | SW:LMO6_HUMAN O43900 homo sapiens (human). lim-only protein 6 (triple lim domain protein 6). 12/1998 [MASS=46098]/LIM domain only 6, a member of the LIM family of proteins which are involved in regulating development, protein-protein interactions and perhaps binding to nucleic acids, contains three LIM domains                                                                                          |
| SW:ATHA_HUMAN  | ATP4A                   | 42            | 2  | 0.79 | 0.08 | SW:ATHA_HUMAN P20648 homo sapiens (human). potassium-transporting atpase alpha chain (ec 3.6.1.36) (proton pump) (gastric h+/k+ atpase alpha subunit). 5/2000 [MASS=114091]/H+/K+ transporting ATPase alpha polypeptide, a putative gastric heterodimeric proton pump responsible for acidification of the stomach lumen                                                                                         |
| SW:PRCD_HUMAN  | PSMB6                   | 32            | 1  | 0.79 | 0.00 | SW:PRCD_HUMAN P28072 homo sapiens (human). proteasome delta chain precursor (ec 3.4.99.46) (macropain delta chain) (multicatalytic endopeptidase complex delta chain) (proteasome subunit y). 5/2000 [MASS=25316]/Proteasome (prosome, macropain) subunit beta 6 (proteasome delta), putative endopeptidase down-regulated by interferon gamma, may be involved in proteolysis and peptidolysis                  |
| GP:AB008567_1  | SPTBN2                  | 11            | 4  | 0.79 | 0.03 | GP:AB008567_1 Homo sapiens mRNA for beta-spectrin III, complete cds. [MASS=271295]/Beta III spectrin, member of a family of actin-cross linking proteins of the membrane-associated cytoskeleton, associates with Golgi and cytoplasmic vesicles                                                                                                                                                                 |

|                |        |            |    |      |      |                                                                                                                                                                                                                                                                                                                                                                                                                                                                                  |
|----------------|--------|------------|----|------|------|----------------------------------------------------------------------------------------------------------------------------------------------------------------------------------------------------------------------------------------------------------------------------------------------------------------------------------------------------------------------------------------------------------------------------------------------------------------------------------|
| GN:AF239156_1  | PDF1A  | 45         | 1  | 0.79 | 0.00 | GN:AF239156_1 Homo sapiens peptide deformylase-like protein mRNA, complete cds; huPD. [MASS=27013]/                                                                                                                                                                                                                                                                                                                                                                              |
| SW:P2AA_HUMAN  | PPP2CA | 7, 34, 41  | 7  | 0.78 | 0.11 | SW:P2AA_HUMAN P05323 homo sapiens (human), oryctolagus cuniculus (rabbit), sus scrofa (pig), and bos taurus (bovine). serine/threonine protein phosphatase 2a, catalytic subunit, alpha isoform (ec 3.1.3. [MASS=35594]/Protein phosphatase 2 catalytic subunit alpha, a catalytic subunit of protein phosphatase 2A involved in regulating diverse cellular processes via protein phosphorylation                                                                               |
| SW:FKB1_HUMAN  | FKBP1A | 7, 33, 41  | 2  | 0.78 | 0.00 | SW:FKB1_HUMAN P20071 homo sapiens (human), and oryctolagus cuniculus (rabbit). fk506-binding protein (fkbp-12) (peptidyl-prolyl cis-trans isomerase) (ec 5.2.1.8) (ppiase) (rotamase) (immunophilin fkbp12 [MASS=11820]/FK506-binding protein 1A, peptidyl prolyl cis-trans isomerase, modulates the Ca2+-release activity of ryanodine receptors, complex with FK506 inhibits calcineurin-dependent lymphokine gene transcription and mediates FK506 immunosuppressive activity |
| GP:AF306723_1  | JUP    | 6, 11, 29  | 1  | 0.78 | 0.00 | GP:BC000441_1 Homo sapiens, junction plakoglobin, clone MGC:8404 IMAGE:2820715, mRNA, complete cds. [MASS=81727]/Junction plakoglobin (gamma catenin), links cell-cell adhesion molecules with the cytoskeleton, involved in desmosome organization, cell adhesion, cell proliferation, apoptosis; loss of heterozygosity is associated with breast and ovarian tumors                                                                                                           |
| GP:AB011145_1  | ERp44  | 45         | 9  | 0.78 | 0.13 | GP:AB011145_1 Homo sapiens mRNA for KIAA0573 protein, partial cds. [MASS=51859]/Member of the thioredoxin family, which are small enzymes involved in redox reactions, has low similarity to S. cerevisiae Pdi1p, which is a protein disulfide isomerase and oxidoreductase                                                                                                                                                                                                      |
| SW:GC5L_HUMAN  | GCN5L1 | 45         | 1  | 0.78 | 0.00 | SW:GC5L_HUMAN P78537 homo sapiens (human). gcn5-like protein 1 (rt14 protein). 7/1999 [MASS=14311]/General control of amino acid synthesis-like 1 (yeast), a widely expressed protein that may be a transcriptional activator                                                                                                                                                                                                                                                    |
| GP:AF091079_1  | YKT6   | 43         | 1  | 0.78 | 0.00 | GP:AF091079_1 Homo sapiens clone 560 SNARE protein Ykt6 mRNA, partial cds. [MASS=21607]/Homolog of S. cerevisiae Ykt6p, which is a v-SNARE required for ER to Golgi transport, likely involved in trafficking proteins from the ER to the Golgi                                                                                                                                                                                                                                  |
| SW:CLH1_HUMAN  | CLTC   | 43         | 49 | 0.78 | 0.44 | SW:CLH1_HUMAN Q00610 homo sapiens (human). clathrin heavy chain 1 (clh-17) (kiaa0034). 5/2000 [MASS=191615]/Clathrin heavy polypeptide c, involved in endocytosis, may bind to endocytic proteins through an LLDLD consensus sequence, interacts with huntingtin interacting protein 1 (HIP1), amino terminus folds into a seven-bladed beta-propeller                                                                                                                           |
| SW:EF11_HUMAN  | EEF1A1 | 35         | 11 | 0.78 | 0.11 | SW:EF11_HUMAN P04720 homo sapiens (human), and oryctolagus cuniculus (rabbit). elongation factor 1-alpha 1 (ef-1-alpha-1) (elongation factor tu) (ef-tu). 12/1998 [MASS=50141]/Eukaryotic translation elongation factor 1 alpha 1, involved in cytoskeletal rearrangement, has putative roles in translational elongation and senescence and GTP binding; possibly involved in diabetes, Fely syndrome, and HIV life cycle                                                       |
| SW:PP1B_HUMAN  | PPP1CB | 34         | 1  | 0.78 | 0.00 | SW:PP1B_HUMAN P37140 homo sapiens (human), rattus norvegicus (rat), mus musculus (mouse), oryctolagus cuniculus (rabbit), and gallus gallus (chicken). serine/threonine protein phosphatase pp1-beta catal [MASS=37187]/Protein phosphatase 1 catalytic subunit beta isoform, subunit of a serine-threonine phosphatase that regulates many metabolic processes                                                                                                                  |
| SW:PRXS_HUMAN  | PSMC6  | 32         | 5  | 0.78 | 0.18 | SW:PRXS_HUMAN Q92524 homo sapiens (human). 26s protease regulatory subunit s10b (proteasome subunit p42). 12/1998 [MASS=44161]/Proteasome (prosome, macropain) 26S subunit ATPase 6, part of both PA700 and PA700-dependent complexes, which regulate intracellular protease activity, may be involved in spermatogenesis                                                                                                                                                        |
| GP:AB011159_1  | NCKAP1 | 16         | 7  | 0.78 | 0.08 | GP:AB011159_1 Homo sapiens mRNA for KIAA0587 protein, complete cds. [MASS=129517]/NCK-associated protein 1, may play a role in regulating beta secretase activity in processing of beta APP, and may play a role in suppressing apoptosis; downregulated in patients with sporadic Alzheimer disease                                                                                                                                                                             |
| SW:GBAK_HUMAN  | GNAI3  | 41, 42, 43 | 4  | 0.77 | 0.10 | SW:GBAK_HUMAN P08754 homo sapiens (human). guanine nucleotide-binding protein g(k), alpha subunit (g(i) alpha-3). 11/1997 [MASS=40401]/G protein alpha i3 subunit, a component of pertussis toxin sensitive heterotrimeric G protein complexes, transduces signals from G protein-coupled receptors to intracellular effectors, inhibits forskolin-stimulated cAMP production                                                                                                    |
| SW:RAB2_HUMAN  | RAB2   | 21, 43     | 5  | 0.77 | 0.05 | SW:RAB2_HUMAN P08886 homo sapiens (human), and canis familiaris (dog). ras-related protein rab-2. 10/1994 [MASS=23546]/Ras-related GTP-binding protein 2, a GTPase which plays a role in vesicle transport from the ER to the Golgi complex; overexpression in nonmalignant peripheral blood lymphocytes is associated with Searzy syndrome                                                                                                                                      |
| SW:SYD_HUMAN   | DARS   | 2, 35, 37  | 4  | 0.77 | 0.15 | SW:SYD_HUMAN P14868 homo sapiens (human). aspartyl-trna synthetase (ec 6.1.1.12) (aspartate-trna ligase) (asprs). 11/1997 [MASS=57192]/Aspartyl-tRNA synthetase, a class II aminoacyl tRNA synthetase that aminoacylates its cognate tRNA with aspartate for protein biosynthesis, associates with a multisynthetase complex, N-terminus may aid interaction with elongation factor 1 alpha                                                                                      |
| SW:IQGA_HUMAN  | IQGAP1 | 11, 41     | 4  | 0.77 | 0.09 | SW:IQGA_HUMAN P46940 homo sapiens (human). ras gtpase-activating-like protein iqgap1 (p195) (kiaa0051). 7/1999 [MASS=189252]/IQ motif-containing GTPase activating protein 1, an actin-associated calmodulin (CALM1)-regulated protein that serves as an effector for CDC42 and RAC1, modulates E-cadherin (CDH1)-mediation cellular adhesion, upregulated in colon carcinomas                                                                                                   |
| SW:DAG1_HUMAN  | DAG1   | 11, 16, 31 | 1  | 0.77 | 0.00 | SW:DAG1_HUMAN Q14118 homo sapiens (human). dystroglycan precursor (dystrophin-associated glycoprotein 1) [contains: alpha-dystroglycan (alpha-dg); beta-dystroglycan (beta-dg)]. 5/2000 [MASS=97581]/Dystroglycan 1, component of a dystrophin-associated glycoprotein complex that binds laminin, may link the extracellular matrix and cytoskeleton, may play a role in synaptic function; deficiency is involved in the pathogenesis of muscular dystrophies                  |
| PIR2:T13152    | WDR1   | 45         | 5  | 0.77 | 0.06 | SW:WDR1_HUMAN O75083 homo sapiens (human). wd-repeat protein 1 (actin interacting protein 1) (nori-1). 10/2001 [MASS=66194]/WD repeat domain 1, contains WD40 repeats which are believed to be involved in protein-protein interactions, may bind actin, and may be involved in hearing                                                                                                                                                                                          |
| SWN:DB83_HUMAN | DB83   | 45         | 1  | 0.77 | 0.00 | SWN:DB83_HUMAN P57088 homo sapiens (human). db83 protein. 8/2001 [MASS=27951]/Member of the UPF0121 uncharacterized protein family, has very strong similarity to uncharacterized rat LOC59303                                                                                                                                                                                                                                                                                   |

|                |          |            |    |      |      |                                                                                                                                                                                                                                                                                                                                                                                                                                                                 |
|----------------|----------|------------|----|------|------|-----------------------------------------------------------------------------------------------------------------------------------------------------------------------------------------------------------------------------------------------------------------------------------------------------------------------------------------------------------------------------------------------------------------------------------------------------------------|
| SW:TCPZ_HUMAN  | CCT6A    | 33         | 3  | 0.77 | 0.08 | SW:TCPZ_HUMAN P40227 homo sapiens (human). t-complex protein 1, zeta subunit (tcp-1-zeta) (cct-zeta) (cct-zeta-1) (tcp20) (htr3). 7/1999 [MASS=58024]/Chaperonin containing T-complex 1 subunit 6A (zeta), part of a cytosolic hexadecamer structure involved in ATP-dependent folding of actin, tubulin and other proteins, decreased activity may result in misfolded tubulin aggregates in Alzheimers disease                                                |
| SW:TDX2_HUMAN  | PRDX2    | 10         | 8  | 0.77 | 0.16 | SW:TDX2_HUMAN Q06830 homo sapiens (human). thioredoxin peroxidase 2 (thioredoxin-dependent peroxide reductase 2) (proliferation-associated protein pag) (natural killer cell enhancing factor a) (nkef-a). [MASS=22110]/Peroxiredoxin 2, a thioredoxin peroxidase member of the AhpC-TSA family, acts as an antioxidant, enhances natural killer activity, may be involved in erythrocyte differentiation, exists as a membrane-associated form in erythrocytes |
| SW:IMB1_HUMAN  | KPNB1    | 24, 36     | 1  | 0.76 | 0.00 | SW:IMB1_HUMAN Q14974 homo sapiens (human). importin beta-1 subunit (karyopherin beta-1 subunit) (nuclear factor p97) (importin 90). 12/1998 [MASS=97234]/Importin beta (karyopherin beta 1), a subunit of the NLS (nuclear localization signal) receptor complex, binds to the nuclear pore complex and mediates translocation of the importin alpha-NLS complex into the nucleus                                                                               |
| SW:CAPB_HUMAN  | CAPZB    | 11, 31     | 8  | 0.76 | 0.13 | SW:CAPB_HUMAN P47756 homo sapiens (human). f-actin capping protein beta subunit (capz). 5/2000 [MASS=30629]/Capping protein Z-lineta beta 1, a subunit of an actin-binding protein that caps the barbed end of actin filaments and regulates actin polymerization dynamics, may have a role in cell motility                                                                                                                                                    |
| GP:AB046798_1  | KIAA1578 | 45         | 1  | 0.76 | 0.00 | GP:AB046798_1 Homo sapiens mRNA for KIAA1578 protein, partial cds; Start codon is not identified.. [MASS=132841]                                                                                                                                                                                                                                                                                                                                                |
| GP:AF151840_1  | ARSDR1   | 45         | 26 | 0.76 | 0.45 | GP:AF167438_1 Homo sapiens androgen-regulated short-chain dehydrogenase/reductase 1 (ARSDR1) mRNA, complete cds; short-chain dehydrogenase/reductase family member./Member of the short-chain dehydrogenase-reductase family, has moderate similarity to a region of WW domain-containing oxidoreductase (mouse Wwox), which is an apoptosis activator                                                                                                          |
| GP:AF155652_1  | PCMF     | 45         | 1  | 0.76 | 0.00 | GP:AF155652_1 Human potassium channel modulatory factor mRNA; PCMF. [MASS=41973]/Protein containing a ZZ zinc finger and a C2H2 type zinc finger domain, which bind nucleic acids, has high similarity to uncharacterized mouse 1700094M07Rik                                                                                                                                                                                                                   |
| SW:CL11_HUMAN  | CLIC1    | 42         | 1  | 0.76 | 0.00 | SW:CL11_HUMAN O00299 homo sapiens (human). chloride intracellular channel protein 1 (nuclear chloride ion channel 27) (ncc27) (p64 clcp). 5/2000 [MASS=26924]/Chloride intracellular channel 1 (nuclear chloride channel-27), an intracellular chloride channel that localizes predominantly to the nucleus, member of the glutathione transferase structural family                                                                                            |
| SW:MLEN_HUMAN  | MYL6     | 11         | 11 | 0.76 | 0.10 | SW:MLEN_HUMAN P16475 homo sapiens (human), bos taurus (bovine), and sus scrofa (pig). myosin light chain alkali, non-muscle isoform (mlc3nm) (lc17a) (lc17-nm). 5/2000 [MASS=16799]/Myosin alkali light chain smooth muscle and non-muscle, a member of the family of alkali myosin light chains, which play a role in the interaction between myosin and actin, intracellular vesicle movement, cytokinesis and cell location                                  |
| SWN:LAD1_HUMAN | LAD1     | 11         | 1  | 0.76 | 0.00 | SWN:LAD1_HUMAN O00515 homo sapiens (human). ladinin 1 (lad-1) (120 kda linear iga bullous dermatosis antigen) (97 kda linear iga bullous dermatosis antigen) (linear iga disease antigen homolog) (lada). 8 [MASS=57157]/Ladinin 1, an anchoring filament protein that is a component of basement membranes, recognized by circulating IgA autoantibodies in linear IgA disease, which is a blistering skin disease, may maintain dermal epidermal cohesion     |
| SW:ITAV_HUMAN  | ITGAV    | 6, 16, 41  | 1  | 0.75 | 0.00 | SW:ITAV_HUMAN P06756 homo sapiens (human). vitronectin receptor alpha subunit precursor (integrin alpha-v) (cd51). 12/1998 [MASS=116052]/Alpha V subunit integrin, a subunit of the vitronectin receptor that is involved in cell-matrix interactions, chemotaxis, phagocytosis and angiogenesis, may contribute to the tumorigenicity of cutaneous malignant melanoma and invasive breast cancer                                                               |
| SW:PRS7_HUMAN  | PSMC2    | 32, 44     | 7  | 0.75 | 0.17 | SW:PRS7_HUMAN P35998 homo sapiens (human). 26s protease regulatory subunit 7 (mss1 protein). 11/1997 [MASS=48634]/26S protease regulatory subunit 7, ATPase subunit of the 26S proteasome, interacts with Tat protein, may be involved in cell cycle control and has a role in the activation of human immunodeficiency virus-1 (HIV-1) gene transcription                                                                                                      |
| PIR2:T46299    | TREX1    | 45         | 1  | 0.75 | 0.00 | PIR2:T46299 hypothetical protein DKFZp434J0310.1 - human [MASS=38923]/Three prime repair exonuclease 1, member of the exonuclease family, displays 3'-5' exodeoxyribonuclease activity and may be involved in DNA repair                                                                                                                                                                                                                                        |
| SW:WFS1_HUMAN  | WFS1     | 18         | 1  | 0.75 | 0.00 | SW:WFS1_HUMAN O76024 homo sapiens (human). wolframin. 5/2000 [MASS=100306]/Wolfram syndrome 1 (wolframin), may play a role in islet beta cell and neuron survival, may influence normal hearing and vision; gene mutation is detected in Wolfram syndrome and some types of hearing loss and may influence type 2 diabetes susceptibility                                                                                                                       |
| SW:AR21_HUMAN  | ARPC3    | 8, 11      | 1  | 0.74 | 0.00 | SW:AR21_HUMAN O15145 homo sapiens (human). arp2/3 complex 21 kda subunit (p21-arc). 12/1998 [MASS=20547]/Actin related protein 2/3 complex subunit 3 (21 kDa), a component of the Arp2/3 complex, may participate in the regulation of actin polymerization, may have a role in the protrusion of lamellipodia, has an essential function in at least HeLa cells                                                                                                |
| SW:KCCB_HUMAN  | CAMK2B   | 34, 41     | 2  | 0.74 | 0.09 | SW:KCCB_HUMAN Q13554 homo sapiens (human). calcium/calmodulin-dependent protein kinase type ii beta chain (cam-kinase ii beta chain) (ec 2.7.1.123) (camk-ii, beta subunit) (fragment). 5/2000 [MASS=15141]/Calcium calmodulin-dependent protein kinase II beta subunit, putative roles in signal transduction and cell growth, increased expression may play a role in schizophrenia; variant forms of the corresponding gene are expressed in tumor cells     |
| SW:SN23_HUMAN  | SNAP23   | 21, 43     | 2  | 0.74 | 0.06 | SW:SN23_HUMAN O00161 homo sapiens (human). synaptosomal associated protein 23 (snap-23) (vesicle-membrane fusion protein snap-23). 5/2000 [MASS=23354]/Synaptosomal-associated protein 23, a member of the SNARE family of proteins that regulate membrane fusion during exocytosis, a t-SNARE that binds to syntaxins and is involved in docking and fusion of transport vesicles during exocytosis                                                            |
| SW:RB3D_HUMAN  | RAB3D    | 16, 21, 43 | 1  | 0.74 | 0.00 | SW:RB3D_HUMAN O95716 homo sapiens (human). ras-related protein rab-3d. 5/2000 [MASS=24267]/Ras-related GTP-binding protein 3d, putative small monomeric GTP-binding protein and GTPase that plays a role in regulated secretion                                                                                                                                                                                                                                 |

|                |          |           |    |      |      |                                                                                                                                                                                                                                                                                                                                                                                                                                                                                         |
|----------------|----------|-----------|----|------|------|-----------------------------------------------------------------------------------------------------------------------------------------------------------------------------------------------------------------------------------------------------------------------------------------------------------------------------------------------------------------------------------------------------------------------------------------------------------------------------------------|
| GP:AB008515_1  | RanBPM   | 11, 31    | 1  | 0.74 | 0.00 | GP:AB008515_1 Homo sapiens mRNA for RanBPM, complete cds. [MASS=55082]/Ran-binding protein 9, plays a role in microtubule nucleation, interacts specifically with RAN guanosine triphosphatase and mediates Ran-dependent centrosomal function                                                                                                                                                                                                                                          |
| GP:AB040887_1  | ZNF291   | 45        | 1  | 0.74 | 0.00 | GP:AB040887_1 Homo sapiens mRNA for KIAA1454 protein, partial cds; Start codon is not identified.. [MASS=142702]/Protein of unknown function                                                                                                                                                                                                                                                                                                                                            |
| GPN:AB047846_1 | LOC51137 | 43        | 7  | 0.74 | 0.24 | SW:COPG_HUMAN Q9y678 homo sapiens (human). coatomer gamma subunit (gamma-coat protein) (gamma-cop). 10/2001 [MASS=97718]/Coatomer protein complex subunit gamma 1, a subunit of the coat of COP I-coated vesicles, predicted to be involved in retrograde Golgi to endoplasmic reticulum transport, contains two clathrin-associated adaptin N-terminal domains                                                                                                                         |
| SW:CLD7_HUMAN  | CLDN7    | 6         | 1  | 0.74 | 0.00 | SW:CLD7_HUMAN O95471 homo sapiens (human). claudin-7. 5/2000 [MASS=22390]/Claudin 7, a putative integral membrane protein which may be involved in tight junction formation                                                                                                                                                                                                                                                                                                             |
| SW:RS4_HUMAN   | RPS4X    | 7, 35     | 3  | 0.73 | 0.14 | SW:RS4_HUMAN P12750 homo sapiens (human), rattus norvegicus (rat), mus musculus (mouse), mesocricetus auratus (golden hamster), and felis silvestris catus (cat). 40s ribosomal protein s4, x isoform (sin [MASS=29467]/Ribosomal protein S4 X-linked, a component of the small 40S ribosomal subunit with roles in translation, cell cycle, and cell proliferation; gene is X-linked but escapes X inactivation, and may therefore contribute to haploinsufficiency in Turner syndrome |
| SW:PLAK_HUMAN  | DP3      | 6, 11, 29 | 12 | 0.73 | 0.19 | SW:PLAK_HUMAN P14923 homo sapiens (human). junction plakoglobin (desmoplakin iii). 11/1997 [MASS=81498]/Junction plakoglobin (gamma catenin), links cell-cell adhesion molecules with the cytoskeleton, involved in desmosome organization, cell adhesion, cell proliferation, apoptosis; loss of heterozygosity is associated with breast and ovarian tumors                                                                                                                           |
| SW:UGS1_HUMAN  | GYS1     | 5, 18     | 5  | 0.73 | 0.15 | SW:UGS1_HUMAN P13807 homo sapiens (human). glycogen [starch] synthase, muscle (ec 2.4.1.11). 5/2000 [MASS=83786]/Glycogen synthase 1 (muscle), catalyzes transfer of a glucosyl residue from UDP-glucose to glycogen, stimulated by insulin, Acipimox and Flouxetine; mutations in the corresponding gene may be associated with non-insulin-dependent diabetes mellitus                                                                                                                |
| SW:RB35_HUMAN  | RAB35    | 21, 43    | 1  | 0.73 | 0.00 | SW:RB35_HUMAN Q15286 homo sapiens (human). ras-related protein rab-35 (rab-1c) (gtp-binding protein ray). 5/2000 [MASS=23025]/Ras-related GTP-binding protein 35, member of the Rab family of GTP-binding proteins, may function in vesicular transport                                                                                                                                                                                                                                 |
| GP:AB020637_1  | KIAA0830 | 45        | 1  | 0.73 | 0.00 | GP:AB020637_1 Homo sapiens mRNA for KIAA0830 protein, partial cds. [MASS=57202]/Protein of unknown function                                                                                                                                                                                                                                                                                                                                                                             |
| SW:KINH_HUMAN  | KIF5B    | 43        | 2  | 0.73 | 0.05 | SW:KINH_HUMAN P33176 homo sapiens (human). kinesin heavy chain (ubiquitous kinesin heavy chain) (ukhc). 7/1999 [MASS=109685]/Kinesin family member 5B (kinesin heavy chain), a microtubule-associated motor protein that may function in intracellular organelle transport and may play a role in susceptibility and resistance                                                                                                                                                         |
| SW:GFA1_HUMAN  | GFPT1    | 5, 18     | 5  | 0.72 | 0.06 | SW:GFA1_HUMAN Q06210 homo sapiens (human). glucosamine--fructose-6-phosphate aminotransferase [isomerizing] 1 (ec 2.6.1.16) (hexosephosphate aminotransferase 1) (d-fructose-6- phosphate amidotransferase [MASS=76616]/Glutamine-fructose-6-phosphate transaminase 1, catalyzes the first step in glucosamine formation, modulates glucose flux and functions in development of insulin resistance, upregulation in kidney associated with diabetic nephropathy                        |
| GP:AF144748_1  | ENTPD2   | 45        | 1  | 0.72 | 0.00 | SW:ENP2_HUMAN Q9y513 homo sapiens (human). ectonucleoside triphosphate diphosphohydrolase 2 (ec 3.6.1.3) (ntpase2) (ecto-atpase) (cd39 antigen-like 1). 10/2001 [MASS=53665]/Ectonucleoside triphosphate diphosphohydrolase 2, a member of the CD39-like family that functions as a ecto-ATPase                                                                                                                                                                                         |
| GP:AK023914_1  | FLJ13852 | 45        | 2  | 0.72 | 0.00 | GP:AK023914_1 Homo sapiens cDNA FLJ13852 fis, clone THYRO1000934, weakly similar to PYRROLINE-5-CARBOXYLATE REDUCTASE (EC 1.5.1.2); unnamed protein product. [MASS=28663]/Protein with high similarity to pyrroline-5-carboxylate reductase 1 (human PYCR1), which catalyzes the NAD(P)H dependent reduction of pyrroline-5-carboxylate to proline, member of the delta 1-pyrroline-5-carboxylate reductase (P5CR) family                                                               |
| SW:AMP1_HUMAN  | KIAA0094 | 45        | 1  | 0.72 | 0.00 | SW:AMP1_HUMAN P53582 homo sapiens (human). putative methionine aminopeptidase 1 (ec 3.4.11.18) (metap 1) (peptidase m 1) (kiaa0094) (fragment). 11/1997 [MASS=44046]/Methionine aminopeptidase 1, metallopeptidase that cleaves N-terminal methionine when the adjacent residue is small and uncharged, enzymatic activity may not be inhibited by the angiogenesis inhibitor fungal fumagillin                                                                                         |
| GP:AB018358_1  | KIAA0905 | 41        | 3  | 0.72 | 0.10 | GP:AB018358_1 Homo sapiens mRNA for ABP125, complete cds; This sequence is a product of alternative splicing of human ABP130. [MASS=129053]/Secretion 31 homolog, a putative component of the COPII coat of secretory pathway vesicles involved in endoplasmic reticulum to Golgi transport, plays a role in intracellular protein trafficking                                                                                                                                          |
| SW:RGP1_HUMAN  | RANGAP1  | 41        | 1  | 0.72 | 0.00 | SW:RGP1_HUMAN P46060 homo sapiens (human). ran-gtpase activating protein 1. 7/1999 [MASS=63542]/Ran GTPase activating protein 1, a GTPase activator for ras family GTP binding protein RAN, ubiquitin-like SUMO-1 modification results in localization to the nuclear pore complex, required for nuclear protein import when bound to RANBP2                                                                                                                                            |
| SW:IF32_HUMAN  | TRIP1    | 35        | 3  | 0.72 | 0.09 | SW:IF32_HUMAN Q13347 homo sapiens (human). eukaryotic translation initiation factor 3 subunit 2 (eif-3 beta) (eif3 p36) (tgf-beta receptor interacting protein 1) (trip-1). 5/2000 [MASS=36502]/Eukaryotic translation initiation factor 3 subunit 2, an eIF3 subunit with a predicted role in translation initiation, binds transforming growth factor beta receptor II (TGFB2) and acts as a modulator of TGFB2 signaling pathways                                                    |
| GP:AF177171_1  | TMOD3    | 11        | 2  | 0.72 | 0.00 | GP:AF177171_1 Homo sapiens tropomodulin 3 (TMOD3) mRNA, complete cds. [MASS=39581]/Tropomodulin 3, putative actin-capping protein for the slow-growing end of filamentous actin, expressed ubiquitously                                                                                                                                                                                                                                                                                 |
| SW:CTN1_HUMAN  | CTNNA1   | 6, 11, 41 | 27 | 0.71 | 0.19 | SW:CTN1_HUMAN P35221 homo sapiens (human). alpha-1 catenin (cadherin-associated protein) (alpha e-catenin). 11/1997 [MASS=100071]/Catenin alpha 1 (cadherin-associated protein); binds cadherins and links them with the actin cytoskeleton                                                                                                                                                                                                                                             |



|               |                                       |            |    |      |      |                                                                                                                                                                                                                                                                                                                                                                                                                                           |
|---------------|---------------------------------------|------------|----|------|------|-------------------------------------------------------------------------------------------------------------------------------------------------------------------------------------------------------------------------------------------------------------------------------------------------------------------------------------------------------------------------------------------------------------------------------------------|
| GP:AB032997_1 | KIAA1171                              | 45         | 3  | 0.71 | 0.13 | GP:AB032997_1 Homo sapiens mRNA for KIAA1171 protein, partial cds; Start codon is not identified.; hh05501 cDNA clone for KIAA1171 has 960-bp and 414-bp insertions (may be introns) after the positions 1275 and 1339 of the sequence of KIAA1171, respectively.. [MASS=66540]/Protein of unknown function                                                                                                                               |
| GP:D87438_1   | KIAA0251                              | 45         | 1  | 0.71 | 0.00 | GP:D87438_1 Human mRNA for KIAA0251 gene, partial cds; Similar to a C.elegans protein in cosmid C14H10. [MASS=90027]/Protein containing two pyridoxal-dependent group II decarboxylase conserved domains, which bind pyridoxal-phosphate groups, has strong similarity to uncharacterized mouse Kiaa0251-hp                                                                                                                               |
| GP:AF091035_1 | RAB21                                 | 41         | 2  | 0.71 | 0.00 | GP:AF091035_1 Homo sapiens GTP-binding protein RAB21 (RAB21) mRNA, complete cds. [MASS=24348]/Ras related GTP binding protein, member of the Rab subfamily of the Ras superfamily of small GTP binding proteins, may be involved in apically directed vesicle-mediated transport in polarized intestinal epithelium                                                                                                                       |
| SW:NEP_HUMAN  | MME                                   | 32         | 34 | 0.71 | 0.19 | SW:NEP_HUMAN P08473 homo sapiens (human). neprilysin (ec 3.4.24.11) (neutral endopeptidase) (nep) (enkephalinase) (common acute lymphocytic leukemia antigen) (calla) (neutral endopeptidase 24.11) (cd10) [MASS=85383]/Enkephalinase; membrane zinc metalloendopeptidase, may inactivate peptide hormones                                                                                                                                |
| SW:CP51_HUMAN | CYP51                                 | 19         | 3  | 0.71 | 0.04 | SW:CP51_HUMAN Q16850 homo sapiens (human). cytochrome p450 51 (ec 1.14.14.1) (cyp1) (p4501) (sterol 14-alpha demethylase) (lanosterol 14-alpha demethylase) (ldm) (p450-14dm). 5/2000 [MASS=56806]/Lanosterol 14-alpha-demethylase (sterol 14alpha-demethylase); cytochrome P450 enzyme involved in sterol biosynthesis                                                                                                                   |
| SW:MYSN_HUMAN | MYH9                                  | 11         | 26 | 0.71 | 0.26 | SW:MYSN_HUMAN P35579 homo sapiens (human). myosin heavy chain, nonmuscle type a (cellular myosin heavy chain, type a) (nmhmc-a). 12/1998 [MASS=226532]/Non-muscle myosin heavy chain 9; motor protein that provides force for muscle contraction, cytokinesis and phagocytosis; contains an ATPase head domain and a rod-like tail domain                                                                                                 |
| SW:ALFA_HUMAN | ALDOA                                 | 5          | 4  | 0.71 | 0.25 | SW:ALFA_HUMAN P04075 homo sapiens (human). fructose-bisphosphate aldolase a (ec 4.1.2.13) (muscle-type aldolase). 5/2000 [MASS=39289]/Aldolase A (fructose-bisphosphate aldolase); reversibly cleaves FBP into DHAP and GAP in glycolysis                                                                                                                                                                                                 |
| GP:AF227905_1 | UGCGL1                                | 33, 34     | 1  | 0.70 | 0.00 | GP:AF227905_1 Homo sapiens UDP-glucose:glycoprotein glucosyltransferase 1 precursor, mRNA, complete cds; HUGT1. [MASS=177190]/UDP-glucose:glycoprotein glucosyltransferase; transfers glucose from UDP-glucose to improperly folded glycoproteins                                                                                                                                                                                         |
| SW:RHOB_HUMAN | ARHB                                  | 11, 41     | 6  | 0.70 | 0.04 | SW:RHOB_HUMAN P01121 homo sapiens (human), mus musculus (mouse), and rattus norvegicus (rat). transforming protein rhob (h6). 12/1998 [MASS=22123]/Ras-related GTP binding protein of the rho subfamily, member B; may regulate assembly of actin stress fibers and focal adhesions; very strongly similar to murine Arhb                                                                                                                 |
| GP:AB040884_1 | OSBPL8                                | 45         | 1  | 0.70 | 0.00 | GP:AB040884_1 Homo sapiens mRNA for KIAA1451 protein, partial cds; Start codon is not identified.. [MASS=56449]/Member of the oxysterol-binding protein (OSBP) family, which are involved in sterol biosynthesis and possibly regulation, contains a pleckstrin homology (PH) domain, has a region of moderate similarity to S. cerevisiae Osh7p                                                                                          |
| GP:U21252_1   | anti-colorectal carcinoma heavy chain | 45         | 1  | 0.70 | 0.00 | GP:U21252_1 Human rearranged Ig gamma heavy chain V region (VH3-JH4b) mRNA, partial cds, clone JGpFv3-06 VH; from VH3 family gene and JH4b. [MASS=13752]                                                                                                                                                                                                                                                                                  |
| GP:AF038535_1 | SYT7                                  | 43         | 1  | 0.70 | 0.00 | GP:AF038535_1 Homo sapiens synaptotagmin VII mRNA, partial cds; similar to rat synaptotagmin VII. [MASS=47195]/Very strongly similar to synaptotagmin 7 (Rn.10193); may be a phospholipid-binding calcium sensor protein                                                                                                                                                                                                                  |
| SW:SYG_HUMAN  | GARS                                  | 2, 35, 37  | 1  | 0.69 | 0.00 | SW:SYG_HUMAN P41250 homo sapiens (human). glycyl-tRNA synthetase (ec 6.1.1.14) (glycine--trna ligase) (glyrs). 10/1996 [MASS=77531]/Glycyl-tRNA synthetase; functions in protein biosynthesis, aminoacylates its cognate tRNAs with phenylalanine/Glycyl-tRNA synthetase, a class II aminoacyl-tRNA synthetase that catalyzes aminoacylation of its cognate tRNA with glycine for protein biosynthesis; an autoantigen in dermatomyositis |
| GP:AB012191_1 | NEDD8                                 | 16, 32, 34 | 2  | 0.69 | 0.04 | GP:AB012191_1 Homo sapiens mRNA for Nedd8-conjugating enzyme hUbc12, complete cds. [MASS=20900]/Neurally expressed developmentally down-regulated 8, an ubiquitin-like protein that conjugates to CUL proteins to activate ubiquitin ligase complex dependent ubiquitination, possibly involved in cell cycle regulation                                                                                                                  |
| PIR2:T46394   | DKFZP434H0820                         | 45         | 5  | 0.69 | 0.17 | PIR2:T46394 hypothetical protein DKFZp434H0820.1 - human (fragment) [MASS=78344]/Protein of unknown function, has moderate similarity to uncharacterized human C1ORF24                                                                                                                                                                                                                                                                    |
| SW:9123_HUMAN | TCTE1L                                | 45         | 3  | 0.69 | 0.07 | SW:9123_HUMAN P51808 homo sapiens (human). protein 91/23. 11/1997 [MASS=13062]/T-complex-associated-testis-expressed 1-like, protein with similarity to murine Tctex1, which is a dynein light chain expressed in retina and in germ cells of the testis                                                                                                                                                                                  |
| SW:S23B_HUMAN | SEC23B                                | 43         | 1  | 0.69 | 0.00 | SW:S23B_HUMAN Q15437 homo sapiens (human). protein transport protein sec23 homolog isoform b. 11/1997 [MASS=86470]/Member of the SEC23 family of vesicle trafficking proteins                                                                                                                                                                                                                                                             |
| SW:RAC3_HUMAN | RAC3                                  | 41         | 2  | 0.69 | 0.00 | SW:RAC3_HUMAN O14658 homo sapiens (human). ras-related c3 botulinum toxin substrate 3 (p21-rac3). 12/1998 [MASS=21379]/Ras-related C3 botulinum toxin substrate 3, a Rho family GTPase involved in integrin signaling via alphaIIb-beta3 (ITGA2B, ITGB3), binds CIB1, regulates cell-matrix adhesion and may activate the JNK pathway and stimulate tumor cell growth                                                                     |
| SW:RIB1_HUMAN | RPN1                                  | 34         | 1  | 0.69 | 0.00 | SW:RIB1_HUMAN P04843 homo sapiens (human). dolichyl-diphosphooligosaccharide--protein glycosyltransferase 67 kda subunit precursor (ec 2.4.1.119) (ribophorin i). 7/1999 [MASS=68569]/Ribophorin I, a putative subunit of oligosaccharyltransferase involved in transcription initiation and possibly protein retention in the endoplasmic reticulum                                                                                      |
| PIR2:T17218   | DKFZP434P1750                         | 45         | 1  | 0.68 | 0.00 | PIR2:T17218 hypothetical protein DKFZp434P1750.1 - human [MASS=26577]/Protein of unknown function, has moderate similarity to a region of EBP50-PDZ interactor of 64 kD (human EPI64), which is a putative RAB GTPase activator that binds the PDZ domains of ERM-binding phosphoprotein 50 (SLC9A3R1) and E3KARP (SLC9A3R2)                                                                                                              |

|               |          |        |    |      |      |                                                                                                                                                                                                                                                                                                                                                                                                                                              |
|---------------|----------|--------|----|------|------|----------------------------------------------------------------------------------------------------------------------------------------------------------------------------------------------------------------------------------------------------------------------------------------------------------------------------------------------------------------------------------------------------------------------------------------------|
| SW:DYJ2_HUMAN | DNCL12   | 45     | 4  | 0.68 | 0.10 | SW:DYJ2_HUMAN O43237 homo sapiens (human). dynein light intermediate chain 2, cytosolic (lic53/55) (lic-2). 7/1998 [MASS=54099]/Cytosolic dynein light intermediate chain 2, a putative subunit of cytoplasmic dynein that may have ATPase activity                                                                                                                                                                                          |
| SW:TCPE_HUMAN | CCT5     | 33     | 4  | 0.68 | 0.14 | SW:TCPE_HUMAN P48643 homo sapiens (human). t-complex protein 1, epsilon subunit (tcp-1-epsilon) (cct-epsilon) (kiaa0098). 11/1997 [MASS=59671]/Chaperonin containing T-complex 1 subunit 5 (epsilon), part of a cytosolic hexadecamer structure involved in ATP-dependent folding of actin, tubulin and other proteins, binds Epstein-Barr Virus-encoded EBNA3 and may mediate its initial folding                                           |
| GP:AB002366_1 | KIAA0368 | 45     | 1  | 0.67 | 0.00 | GP:AB002366_1 Human mRNA for KIAA0368 gene, partial cds. [MASS=159478]/Protein of unknown function, has low similarity to a region of <i>S. cerevisiae</i> Ecm29p, which is involved in cell wall structure or biosynthesis                                                                                                                                                                                                                  |
| SW:ZO1_HUMAN  | TJP1     | 45     | 1  | 0.67 | 0.00 | SW:ZO1_HUMAN Q07157 homo sapiens (human). tight junction protein zo-1 (zona occludens 1 protein) (tight junction protein 1). 5/2000 [MASS=194723]/Tight junction protein 1, component of the blood brain barrier that may play roles in the organization and attachment of tight junction components, cellular differentiation, placental development, breast cancer progression, and pancreatic cancer                                      |
| SW:RL7A_HUMAN | RPL7A    | 35     | 1  | 0.67 | 0.00 | SW:RL7A_HUMAN P11518 homo sapiens (human), and rattus norvegicus (rat). 60s ribosomal protein l7a (surfeit locus protein 3) (pla-x polypeptide). 7/1999 [MASS=29864]/Ribosomal protein L7a (surfeit-3), a putative component of the 60S ribosomal subunit, likely to be involved in protein biosynthesis and in colorectal carcinogenesis; trk-2h fusion oncogene in breast cancer cells comprises a fragment of RPL7A fused to TRK          |
| SW:HD_HUMAN   | HD       | 16     | 1  | 0.67 | 0.00 | SW:HD_HUMAN P42858 homo sapiens (human). huntingtin (huntington's disease protein) (hd protein). 12/1998 [MASS=347860]/Huntingtin, antiapoptotic protein, may be involved in intracellular transport; mutations in the gene cause Huntington disease and result in the production of a protein that interferes with transcription and proteasome-mediated protein degradation                                                                |
| SW:TDXN_HUMAN | PRDX4    | 34, 41 | 5  | 0.66 | 0.19 | SW:TDXN_HUMAN Q13162 homo sapiens (human). thioredoxin peroxidase ao372 (thioredoxin-dependent peroxide reductase a0372) (antioxidant enzyme aoe372) (aoe37-2). 7/1999 [MASS=30540]/Peroxiredoxin 4, a thioredoxin dependent peroxidase that is regulated by interactions with other thiol peroxidases, may mediate hydrogen peroxide activation of NF-kappaB by modulating phosphorylation of cytoplasmic I kappa B-alpha (NFKBIA)          |
| SW:PRS8_HUMAN | SUG1}    | 29, 32 | 9  | 0.66 | 0.15 | SW:PRS8_HUMAN P47210 homo sapiens (human). 26s protease regulatory subunit 8 (proteasome subunit p45) (thyroid hormone receptor interacting protein 1) (trip1). 11/1997 [MASS=45653]/ATPase subunit 5 of the 26S proteasome, which is a multicatalytic proteinase complex involved in cellular protein degradation; may also function as a transcriptional modulator                                                                         |
| SW:STB3_HUMAN | STXB3    | 21, 43 | 6  | 0.66 | 0.15 | SW:STB3_HUMAN O00186 homo sapiens (human). syntaxin binding protein 3 (unc-18 homolog 3) (unc-18c) (unc-18-3). 5/2000 [MASS=67574]/Syntaxin binding protein 3, binds syntaxin 4 (STX4), predicted to be involved in vesicle transport and docking and in neurotransmitter release                                                                                                                                                            |
| SW:CLH2_HUMAN | CLTCL1   | 16, 43 | 10 | 0.66 | 0.15 | SW:CLH2_HUMAN P53675 homo sapiens (human). clathrin heavy chain 2 (clh-22). 5/2000 [MASS=187030]/Clathrin heavy polypeptide-like 1, may play roles in vesicle budding and in cytoskeleton-dependent trans-Golgi network membrane sorting; gene is among those deleted in velocardiofacial and DiGeorge syndromes, and is a fusion partner with ALK in lymphoma                                                                               |
| GP:D38549_1   | CYFIP1   | 45     | 2  | 0.66 | 0.11 | GP:D38549_1 Human mRNA for KIAA0068 gene, partial cds; ha1025 is new. [MASS=147136]/Cytosolic FMRP interacting protein 1, a member of the CYFIP protein family, binds F-actin and active, GTP-bound RAC1, predicted to play a role in membrane ruffling formation and may be necessary for neuronal structure development or maintenance                                                                                                     |
| GP:U86782_1   | POH1     | 32     | 3  | 0.66 | 0.19 | GP:U86782_1 Human 26S proteasome-associated pad1 homolog (POH1) mRNA, complete cds; human homolog of fission yeast pad1. [MASS=34577]/26S proteasome-associated pad1 homolog, a subunit of the 26S proteasome, confers multidrug resistance and resistance to ultraviolet light when overexpressed                                                                                                                                           |
| SW:AR41_HUMAN | ARPC1B   | 8, 11  | 4  | 0.65 | 0.18 | SW:AR41_HUMAN O15143 homo sapiens (human). arp2/3 complex 41 kda subunit (p41-arc). 12/1998 [MASS=40950]/Actin related protein 2/3 complex 1A, component of the Arp2/3 complex, interacts directly with an ARPC4 and ARPC5 heterodimer, may have a role in Arp2/3 complex assembly or maintenance, may regulate complex activity or intracellular distribution                                                                               |
| PIR2:T08684   | KIAA1265 | 45     | 1  | 0.65 | 0.00 | PIR2:T08684 hypothetical protein DKFZp564L2123.1 - human (fragment) [MASS=60751]/Member of the ZIP zinc transporter family, which may be metal transporters, has moderate similarity to uncharacterized human LIV-1                                                                                                                                                                                                                          |
| SW:2AAA_HUMAN | PPP2R1A  | 45     | 1  | 0.65 | 0.00 | SW:2AAA_HUMAN P30153 homo sapiens (human). serine/threonine protein phosphatase 2a, 65 kda regulatory subunit a, alpha isoform (pp2a, subunit a, pr65-alpha isoform) (pp2a, subunit a, r1-alpha isoform) ([MASS=65092]/Protein phosphatase 2 regulatory subunit A alpha isoform, a regulatory subunit of the PP2 enzyme complex, binds CTLA-4 (Cd152), CD28 and RelA (RELA); mutations in the gene are occasionally detected in cancer cells |
| SW:DYI2_HUMAN | DNCI2    | 45     | 3  | 0.65 | 0.01 | SW:DYI2_HUMAN Q13409 homo sapiens (human). dynein intermediate chain 2, cytosolic (dh ic-2) (cytoplasmic dynein intermediate chain 2) (fragment). 5/2000 [MASS=39236]/Protein with strong similarity to cytoplasmic dynein intermediate polypeptide 2 (rat Dnci2), which may interact with p150Glued (rat Dctn1) subunit of dynactin                                                                                                         |
| SW:IF2P_HUMAN | IF2      | 35     | 2  | 0.65 | 0.02 | SW:IF2P_HUMAN O60841 homo sapiens (human). translation initiation factor if-2. 5/2000 [MASS=138755]/Translation initiation factor, member of the Tu elongation factor family, has moderate similarity to yeast YAL035W translation initiation factor 2 (eIF2)                                                                                                                                                                                |
| GP:AF003521_1 | JAG2     | 16     | 1  | 0.65 | 0.00 | GP:AF003521_1 Homo sapiens Jagged 2 mRNA, complete cds; ligand for Notch receptor; Contains EGF repeats and DSL domain. [MASS=133394]/Jagged 2, a Notch receptor ligand that may coordinate differentiation among progenitors adopting identical cell fates, plays a role in hair cell development in the cochlea                                                                                                                            |
| SW:DIA1_HUMAN | DIAPH1   | 11     | 2  | 0.65 | 0.08 | SW:DIA1_HUMAN O60610 homo sapiens (human). diaphanous protein homolog 1. 5/2000 [MASS=138979]/Diaphanous, contains profilin and rho binding domains and possibly regulates actin polymerization in inner ear hair cells; mutation of the gene is associated with nonsyndromal-postlingual deafness                                                                                                                                           |

|               |           |                   |   |      |      |                                                                                                                                                                                                                                                                                                                                                                                                                                                                                                                                                                                                                                                      |
|---------------|-----------|-------------------|---|------|------|------------------------------------------------------------------------------------------------------------------------------------------------------------------------------------------------------------------------------------------------------------------------------------------------------------------------------------------------------------------------------------------------------------------------------------------------------------------------------------------------------------------------------------------------------------------------------------------------------------------------------------------------------|
| GP:AK026010_1 | FLJ22357  | 45                | 3 | 0.64 | 0.02 | GP:AK026010_1 Homo sapiens cDNA: FLJ22357 fis, clone HRC06404; unnamed protein product. [MASS=97371]/Member of the rhomboid family of integral membrane proteins, has high similarity to uncharacterized human FLJ22341                                                                                                                                                                                                                                                                                                                                                                                                                              |
| GP:AB014718_1 | TNFRSF10B | 41                | 2 | 0.64 | 0.10 | GP:AB014718_1 Homo sapiens DR5 gene, exon 9 and complete cds. [MASS=47894]/Tumor necrosis factor receptor superfamily member 10b, receptor that binds the ligand TRAIL (TNFSF10), induces apoptosis through interaction with FADD and activation of caspase 8 (CASP8), loss of apoptotic function is associated with cancer                                                                                                                                                                                                                                                                                                                          |
| SW:EGFR_HUMAN | EGFR      | 7, 11, 34, 41, 43 | 2 | 0.62 | 0.00 | SW:EGFR_HUMAN P00533 homo sapiens (human). epidermal growth factor receptor precursor (ec 2.7.1.112). 12/1998 [MASS=134277]/Epidermal growth factor receptor, a receptor protein tyrosine kinase that binds epidermal growth factor (EGF) and transforming growth factor alpha (TGFA), involved in cell proliferation and differentiation, implicated in tumor invasion and metastasis                                                                                                                                                                                                                                                               |
| SW:HS71_HUMAN | HSPA1A    | 10, 25, 39        | 6 | 0.62 | 0.14 | SW:HS71_HUMAN P08107 homo sapiens (human). heat shock 70 kda protein 1 (hsp70.1) (hsp70-1/hsp70-2). 5/2000 [MASS=70052]/Heat shock 70 kDa protein 1A, a member of the HSP70 chaperone family involved in protein folding, translocation, and complex assembly, blocks AU-rich mRNA decay by nuclear sequestering of AU-rich binding protein, may contribute to celiac disease                                                                                                                                                                                                                                                                        |
| PIR2:T46901   | PTD004    | 45                | 4 | 0.62 | 0.09 | PIR2:T46901 hypothetical protein DKFzP761C10121.1 - human [MASS=44684]/Protein with high similarity to GTP-binding proteins                                                                                                                                                                                                                                                                                                                                                                                                                                                                                                                          |
| SW:CYSR_HUMAN | CSRP1     | 45                | 5 | 0.62 | 0.05 | SW:CYSR_HUMAN P21291 homo sapiens (human). cysteine-rich protein 1 (crp1) (crp). 7/1999 [MASS=20436]/Cysteine and glycine-rich protein, a two zinc finger/LIM domain protein which interacts with alpha actinin (ACTN1); capable of homodimerization, may also be a DNA-binding protein                                                                                                                                                                                                                                                                                                                                                              |
| SW:XIP_HUMAN  | HBXIP     | 45                | 1 | 0.62 | 0.00 | SW:XIP_HUMAN O43504 homo sapiens (human). hepatitis b virus x interacting protein (hbv-interacting protein) (hbv x interacting protein). 5/2000 [MASS=9614]/Hepatitis B virus x-interacting protein, an antiviral response protein that interacts with hepatitis B virus protein x (HBx), inhibits hepatitis B viral replication and disrupts the viral life cycle by negatively regulating HBx transactivation activity                                                                                                                                                                                                                             |
| GP:AF001628_1 | AbiBP4    | 41                | 2 | 0.62 | 0.01 | GP:AF001628_1 Homo sapiens interactor protein AbiBP4 (AbiBP4) mRNA, complete cds; member of the Abl interactor protein family; contains an SH3 domain and an SH3 binding domain. [MASS=49305]/Spectrin SH3 domain binding protein 1, has an SH3 domain, binds SH3 domains of EPS8, ABL1, and spectrin (SPTA1), acts in pinocytosis, inhibits cell proliferation; fusion of the corresponding gene with the MLL gene is linked to acute myelogenous leukemia                                                                                                                                                                                          |
| SW:MRP4_HUMAN | MRP4      | 10, 42            | 2 | 0.61 | 0.03 | SW:MRP4_HUMAN O15439 homo sapiens (human). multidrug resistance-associated protein 4 (fragment). 5/2000 [MASS=18448]/Multidrug resistance protein 4, a member of the ATP-binding cassette transporter superfamily, transports cAMP, cGMP, and estradiol 17-beta-D-glucuronide, acts as a multidrug efflux pump, may be involved in cellular detoxification and xenobiotic resistance/Multidrug resistance protein 4, a member of the ATP-binding cassette transporter superfamily, transports cAMP, cGMP, and estradiol 17-beta-D-glucuronide, acts as a multidrug efflux pump, may be involved in cellular detoxification and xenobiotic resistance |
| GP:AC004839_2 | BAP29     | 45                | 3 | 0.61 | 0.01 | GP:AC004839_2 [MASS=28320/B-cell antigen receptor-associated protein 29, protein with strong similarity to murine Bcap29p, a B-cell receptor-associated protein that associates preferentially with IgD and weakly with IgM]                                                                                                                                                                                                                                                                                                                                                                                                                         |
| GP:AF126181_1 | MAGED2    | 45                | 1 | 0.61 | 0.00 | SW:MGD2_HUMAN Q9unf1 homo sapiens (human). melanoma-associated antigen d2 (mage-d2 antigen) (breast cancer associated gene 1 protein) (bcg-1) (11b6). 10/2001 [MASS=64954]/Member of the MAGE (melanoma antigen-encoding gene) family, which are expressed in a variety of tumors, has moderate similarity to neurotrophin-receptor interacting MAGE homolog (rat Maged1), which positively regulates LNGFR-mediated apoptosis                                                                                                                                                                                                                       |
| SW:AOP2_HUMAN | AOP2      | 10                | 3 | 0.61 | 0.03 | SW:AOP2_HUMAN P30041 homo sapiens (human). antioxidant protein 2 (ec 1.11.1.7) (24 kda protein) (liver 2d page spot 40) (red blood cells page spot 12). 12/1998 [MASS=24904]/Protein with strong similarity to anti-oxidant proteins, member of the AhpC/TSA family                                                                                                                                                                                                                                                                                                                                                                                  |
| SW:CAP1_HUMAN | CAP       | 9, 41             | 1 | 0.60 | 0.00 | SW:CAP1_HUMAN Q01518 homo sapiens (human). adenyllyl cyclase-associated protein 1 (cap 1). 10/1996 [MASS=51673]/Adenyllyl cyclase-associated protein 1, putative homolog of bifunctional S. cerevisiae Srv2p, C-terminus mediates actin binding and may play a role in regulating cell growth and morphogenesis, the N-terminal domain may bind and/or regulate adenyllyl cyclase                                                                                                                                                                                                                                                                    |
| SW:NC5R_HUMAN | DIA1      | 18, 42            | 2 | 0.60 | 0.02 | SW:NC5R_HUMAN P00387 homo sapiens (human). nadh-cytochrome b5 reductase (ec 1.6.2.2) (b5r). 11/1997 [MASS=34104]/NADH-dependent cytochrome b5 reductase (diaphorase), soluble erythrocyte-specific form functions in methemoglobin reduction, ubiquitous membrane-bound form functions in lipid metabolism; mutations in the gene cause methemoglobinemia types I and II                                                                                                                                                                                                                                                                             |
| PIR2:JC1365   | FKBP2     | 33                | 3 | 0.60 | 0.14 | PIR2:JC1365 FK506/rapamycin-binding protein FKBP13 precursor - human [MASS=15649]/FK506-binding protein 2 (FKBP13), an ER membrane-associated member of a family of peptidyl-prolyl cis-trans isomerases that bind the macrolide immunosuppressant drugs FK506 and rapamycin, does not play a role in the immunosuppressant action of FK506                                                                                                                                                                                                                                                                                                          |
| SW:PRCZ_HUMAN | PSMA5     | 32                | 4 | 0.60 | 0.04 | SW:PRCZ_HUMAN P28066 homo sapiens (human). proteasome zeta chain (ec 3.4.99.46) (macropain zeta chain) (multicatalytic endopeptidase complex zeta chain). 7/1999 [MASS=26469]/Proteasome subunit alpha type 5 (ZETA), component of the 20S catalytic core proteasome that is involved in cellular protein degradation, has ribonuclease activity                                                                                                                                                                                                                                                                                                     |
| SW:RAPB_HUMAN | RAP1B     | 7, 41             | 2 | 0.59 | 0.04 | SW:RAPB_HUMAN P09526 homo sapiens (human), and bos taurus (bovine). ras-related protein rap-1b (gtp-binding protein smg p21b). 7/1993 [MASS=20825]/Ras related protein 1b, member of the Ras superfamily of low molecular weight GTP-binding proteins, regulates cell cycle progression and cellular proliferation, may play a role in cAMP-responsive tumorigenesis                                                                                                                                                                                                                                                                                 |

|                |          |            |   |      |      |                                                                                                                                                                                                                                                                                                                                                                                                                                                                                    |
|----------------|----------|------------|---|------|------|------------------------------------------------------------------------------------------------------------------------------------------------------------------------------------------------------------------------------------------------------------------------------------------------------------------------------------------------------------------------------------------------------------------------------------------------------------------------------------|
| SW:MOES_HUMAN  | MSN      | 6, 11, 41  | 1 | 0.59 | 0.00 | SW:MOES_HUMAN P26038 homo sapiens (human). moesin (membrane-organizing extension spike protein). 6/1994 [MASS=67689]/Moesin, putative receptor that may link the cytoskeleton and plasma membrane and play roles in microvillus assembly and cell morphogenesis, may be an autoantigen in rheumatoid arthritis and may play a role in impaired brain development in Down syndrome                                                                                                  |
| GP:AF024636_1  | STK24    | 34, 41     | 1 | 0.59 | 0.00 | GP:AF024636_1 Homo sapiens STE20-like kinase 3 (mst-3) mRNA, complete cds; protein serine/threonine kinase; similar to yeast STE20. [MASS=47941]/Serine-threonine kinase 24 (Ste20 yeast homolog), member of the SPS1 subgroup of the STE20-like protein family, a serine-threonine kinase that prefers manganese as a cofactor and uses either GTP or ATP as a phosphate donor                                                                                                    |
| GP:AB011173_1  | KIAA0601 | 25         | 1 | 0.59 | 0.00 | GP:AB011173_1 Homo sapiens mRNA for KIAA0601 protein, partial cds. [MASS=96760]/KIAA0601 protein, a riboflavin-binding protein, member of a FAD dependent enzyme superfamily, component of the HDAC1 histone deacetylase complex, may be involved in gene silencing via covalent chromatin modification                                                                                                                                                                            |
| SW:HS74_HUMAN  | HSPA4    | 10         | 3 | 0.59 | 0.16 | heat shock 70 kda protein 4 (heat shock 70-related protein app-2/Heat shock 70kD protein 4, putative ATP-binding molecular chaperone and member of the HSP110 family, binds RNA, may play a role in stress response and RNA stability                                                                                                                                                                                                                                              |
| SW:ARP3_HUMAN  | ACTR3    | 8, 11      | 6 | 0.58 | 0.13 | SW:ARP3_HUMAN P32391 homo sapiens (human), and bos taurus (bovine). actin-like protein 3 (actin-2). 7/1999 [MASS=47371]/Actin-related protein 3 homolog, a component of the Arp2/3 protein complex, which is involved in actin cytoskeleton organization and biogenesis and may have a role in cell motility                                                                                                                                                                       |
| PIR2:T13151    | CD2AP    | 11, 31, 41 | 3 | 0.58 | 0.01 | PIR2:T13151 adapter protein CMS - human [MASS=71451]/CMS: an adapter molecule involved in cytoskeletal rearrangements/CD2-associated protein, an adaptor that may play a role in kidney function and mediate cytoskeletal rearrangement; mouse Cd2ap is associated with congenital nephrotic syndrome and possibly Nail-Patella syndrome nephropathy and polycystic kidney disease                                                                                                 |
| PIR2:A53016    | MYO5A    | 11, 16, 43 | 1 | 0.58 | 0.00 | PIR2:A53016 myosin heavy chain VA - human (fragment) [MASS=96052]/Class V myosin (Myoxin), a member of the myosin family of proteins, a motor protein that may be involved in vesicle transport and epidermal differentiation; mutation of the corresponding gene is associated with Griscelli syndrome                                                                                                                                                                            |
| SW:MRP1_HUMAN  | ABCC1    | 10, 26, 42 | 4 | 0.58 | 0.08 | SW:MRP1_HUMAN P33527 homo sapiens (human). multidrug resistance-associated protein 1. 5/2000 [MASS=171561]/ATP-binding cassette subfamily C member 1 (multiple drug resistance protein 1), an ATP-binding cassette transporter that acts as a multidrug efflux pump conferring resistance to lipophilic drugs and chemotherapeutic agents                                                                                                                                          |
| GP:AK024639_1  | FLJ20986 | 45         | 1 | 0.58 | 0.00 | GP:AK024639_1 Homo sapiens cDNA: FLJ20986 fis, clone CAE01156; unnamed protein product. [MASS=69591]/ contains a domain similar to a hydrolase/ PROBABLE CATION-TRANSPORTING ATPASE/Member of the haloacid dehalogenase or epoxide hydrolase family, has weak similarity to a region of sodium- and potassium-transporting ATPase alpha 4 (rat Atp1a4), which is an ATPase that is sensitive to inhibition by ouabain and vanadate                                                 |
| PIR2:JE0350    | AGR2     | 45         | 1 | 0.58 | 0.00 | PIR2:JE0350 Anterior gradient-2 - human [MASS=19979]/hAG-2, the human homologue of the Xenopus laevis cement gland gene XAG-2, is coexpressed with estrogen receptor in breast cancer cell lines/Anterior gradient 2 (Xenopus laevis) homolog, putative protein coexpressed with estrogen receptor in some breast cancer cell lines, expression in a colon carcinoma cell line may be regulated by the peroxisome proliferator-activated receptor gamma (PPARG)                    |
| SW:ARGR_HUMAN  | ARMET    | 45         | 7 | 0.58 | 0.09 | SW:ARGR_HUMAN P55145 homo sapiens (human). arginine-rich protein. 10/1996 [MASS=26906]/A gene from human chromosomal band 3p21.1 encodes a highly conserved arginine-rich protein and is mutated in renal cell carcinomas/Arginine-rich mutated in early stage tumors, may be involved in cell growth or maintenance; point mutations of the gene are seen in renal cell carcinoma, pancreatic cancer, squamous cell carcinoma and other cancers of the lung, breast, and prostate |
| SW:NSDL_HUMAN  | NSDHL    | 19         | 6 | 0.58 | 0.16 | SW:NSDL_HUMAN Q15738 homo sapiens (human). nad(p)-dependent steroid dehydrogenase-like protein (h105e3 protein). 5/2000 [MASS=41900]/NAD(P)H steroid dehydrogenase-like protein, a 3 beta-hydroxysteroid dehydrogenase that functions in cholesterol biosynthesis; mutations in the corresponding gene cause CHILD syndrome                                                                                                                                                        |
| GP:AB029025_1  | KIAA1102 | 45         | 3 | 0.57 | 0.05 | GP:AB029025_1 Homo sapiens mRNA for KIAA1102 protein, partial cds. [MASS=95613]/ contains a LIM domain/ EST/Protein containing a LIM domain, which may mediate protein-protein interactions                                                                                                                                                                                                                                                                                        |
| GP:AB033001_1  | FLJ10209 | 45         | 2 | 0.57 | 0.10 | GP:AB033001_1 Homo sapiens mRNA for KIAA1175 protein, partial cds; Start codon is not identified.. [MASS=70419]/ human homologue of cytosolic sorting protein PACS-1a/Cytosolic sorting protein 1, may control the subcellular localization of proteins between the Golgi and endosomal compartments; may play a role in the pathogenesis of HIV-1                                                                                                                                 |
| GP:AF112227_1  | TDE1     | 45         | 1 | 0.57 | 0.00 | The human TDE gene homologue: localization to 20q13.1-13.3 and variable expression in human tumor cell lines and tissue/membrane protein/Tumor differentially expressed 1, a putative membrane protein that is overexpressed in lung tumors and colorectal tumor cells                                                                                                                                                                                                             |
| SW:ATND_HUMAN  | ATP1B3   | 42         | 3 | 0.57 | 0.07 | SW:ATND_HUMAN P54709 homo sapiens (human). sodium/potassium-transporting atpase beta-3 chain (sodium/potassium-dependent atpase beta-3 subunit) (atpb-3). 7/1999 [MASS=31513]/ATPase (Na+/K+ transporting beta 3 subunit), proposed to actively transport sodium and potassium across the cell membrane to produce electrochemical gradients                                                                                                                                       |
| SW:RB4A_HUMAN  | RAB4A    | 21, 43     | 1 | 0.56 | 0.00 | SW:RB4A_HUMAN P20338 homo sapiens (human). ras-related protein rab-4a. 10/1996 [MASS=23902]/GTP-binding protein, a member of the rab family of proteins, involved in early endosome trafficking and receptor recycling                                                                                                                                                                                                                                                             |
| GPN:AF217190_1 | DDX36    | 45         | 2 | 0.56 | 0.00 | contains a DEXDc, DEAD-like helicases superfamily domains/Member of the DEAD or DEAH box ATP-dependent RNA helicase family, contains two helicase conserved C-terminal domains, has low similarity to C. elegans MOG-4, which is involved in oogenesis and development/                                                                                                                                                                                                            |

|                |          |            |    |      |      |                                                                                                                                                                                                                                                                                                                                                                                                                                                                                                              |
|----------------|----------|------------|----|------|------|--------------------------------------------------------------------------------------------------------------------------------------------------------------------------------------------------------------------------------------------------------------------------------------------------------------------------------------------------------------------------------------------------------------------------------------------------------------------------------------------------------------|
| SW:PLSL_HUMAN  | LCP1     | 45         | 2  | 0.56 | 0.05 | SW:PLSL_HUMAN P13796 homo sapiens (human). I-plastin (lymphocyte cytosolic protein 1) (lcp-1) (lc64p). 11/1997 [MASS=70289]/Lymphocyte cytosolic protein 1, member of the fibrin family, binds calcium and bundles actin, binds to the Ca2+ binding protein grancalcin (GCA), binds to the HLA-DR53 molecule, which is linked to autoimmune diseases; may contribute to tumorigenesis                                                                                                                        |
| GP:AF100757_1  | COPS4    | 41         | 2  | 0.56 | 0.00 | GP:AF100757_1 Homo sapiens COP9 complex subunit 4 mRNA, complete cds. [MASS=46198]/COP9 (constitutive photomorphogenic Arabidopsis homolog) subunit 4, a subunit of a complex related to the 26S proteasome regulatory complex, and possibly involved in regulating protein degradation                                                                                                                                                                                                                      |
| SW:SNAA_HUMAN  | NAPA     | 32         | 3  | 0.56 | 0.01 | SW:SNAA_HUMAN P54920 homo sapiens (human). alpha-soluble nsf attachment protein (snap-alpha). 5/2000 [MASS=33247]/N-ethylmaleimide-sensitive factor (NSF) attachment protein alpha, binds SNARE complexes and recruits NSF to form the 20s fusion particle, stimulates NSF ATPase activity promoting SNARE complex disassembly and exocytosis, functions in intra-Golgi transport                                                                                                                            |
| SW:DEST_HUMAN  | DSTN     | 11         | 14 | 0.56 | 0.22 | SW:DEST_HUMAN P18282 homo sapiens (human), and sus scrofa (pig). destrin (actin depolymerizing factor) (adf). 11/1997 [MASS=18506]/Actin depolymerizing factor, a member of the ADF/cofilin family that binds to actin and is predicted to depolymerize F-actin by altering filament tilt and twist; present in rod-like inclusions within neurons in the brains of Alzheimer's patients                                                                                                                     |
| SW:MYSA_HUMAN  | MYH6     | 11         | 1  | 0.56 | 0.00 | SW:MYSA_HUMAN P13533 homo sapiens (human). myosin heavy chain, cardiac muscle alpha isoform. 7/1998 [MASS=223690]/Cardiac myosin heavy chain 6, a putative structural component of muscle, may be required for heart development and function; mutation of corresponding gene is associated with familial hypertrophic cardiomyopathy                                                                                                                                                                        |
| SW:LDLR_HUMAN  | LDLR     | 19, 36, 43 | 3  | 0.55 | 0.04 | SW:LDLR_HUMAN P01130 homo sapiens (human). low-density lipoprotein receptor precursor (ldl receptor). 5/2000 [MASS=95376]/Low density lipoprotein receptor, mediates uptake of low density lipoproteins, involved in lipid metabolism; gene variations are associated with familial hypercholesterolemia, hypertension, atherosclerosis, and coronary artery disease                                                                                                                                         |
| SW:COF1_HUMAN  | CFL1     | 11, 24, 41 | 14 | 0.55 | 0.21 | SW:COF1_HUMAN P23528 homo sapiens (human). cofilin, non-muscle isoform. 11/1997 [MASS=18502]/Non-muscle cofilin, an actin-binding protein that assists translocation of actin from the cytoplasm to the nucleus; inactivation through phosphorylation by LIM-kinase leads to actin depolymerization                                                                                                                                                                                                          |
| GPN:AF060225_1 | KIAA1607 | 45         | 2  | 0.54 | 0.04 | LYST-interacting protein LIP5;"Interactions of the Chediak-Higashi lysosomal-trafficking regulator protein with SNARE complex and signal transduction proteins"; dopamine responsive protein DRG-1/Protein containing a beige or BEACH domain and five WD domains (WD-40 repeats), has a region of moderate similarity to a region of lysosomal trafficking regulator protein (mouse Lyst), which is required for vesicular transport to and from lysosomes                                                  |
| GP:AK022489_1  | MYO1B    | 11         | 1  | 0.54 | 0.00 | GP:AK022489_1 Homo sapiens cDNA FLJ12427 fis, clone MAMMA1003127, highly similar to MYOSIN I ALPHA; unnamed protein product. [MASS=31145]/Myosin IB, a member of the unconventional myosin family of motor ATPases                                                                                                                                                                                                                                                                                           |
| SW:UBCC_HUMAN  | UBE2N    | 7, 32, 34  | 1  | 0.53 | 0.00 | SW:UBCC_HUMAN Q16781 homo sapiens (human). ubiquitin-conjugating enzyme e2-17 kda (ec 6.3.2.19) (ubiquitin- protein ligase) (ubiquitin carrier protein) (ubc13). 7/1999 [MASS=17138]/Ubiquitin-conjugating enzyme E2N (yeast UBC13 homolog), forms heterodimers with ubiquitin-conjugating enzyme E2 variants 1 or 2 (UBE2V1, UBE2V2), and catalyzes formation of unique lysine 63-linked polyubiquitin chains involved in I kappaB kinase activation                                                        |
| SW:VINC_HUMAN  | VCL      | 6, 11      | 2  | 0.53 | 0.02 | SW:VINC_HUMAN P18206 homo sapiens (human). vinculin. 12/1998 [MASS=116591]/Vinculin, a cytoskeletal protein that localizes to focal adhesions of cell-cell and cell-matrix junctions, also functions as a tumor suppressor; deficiency of alternate cardiac form, metavinculin, is associated with idiopathic dilated cardiomyopathy                                                                                                                                                                         |
| SW:GLNA_HUMAN  | GLUL     | 2, 26      | 1  | 0.53 | 0.00 | SW:GLNA_HUMAN P15104 homo sapiens (human). glutamine synthetase (ec 6.3.1.2) (glutamate--ammonia ligase). 12/1998 [MASS=42064]/Glutamine synthase, catalyzes the condensation of glutamate and ammonia to form glutamine, may clear L-glutamate from synapses, reduced expression in the brain and abnormal presence in cerebral spinal fluid is associated with Alzheimer disease                                                                                                                           |
| SW:ESTD_HUMAN  | ESD      | 26         | 1  | 0.53 | 0.00 | SW:ESTD_HUMAN P10768 homo sapiens (human). esterase d (ec 3.1.1.1). 5/2000 [MASS=31463]/Esterase D (formylglutathione hydrolase), a carboxylesterase that may be involved in detoxification                                                                                                                                                                                                                                                                                                                  |
| PIR2:A59253    | MYO1C    | 11         | 4  | 0.53 | 0.05 | myosin I beta/Myosin IC, member of a family of ATPase motor proteins, predicted to participate in actin filament organization at the plasma membrane, may show ATP-independent actin filament binding, interacts with CBL                                                                                                                                                                                                                                                                                    |
| SW:AAAT_HUMAN  | SLC1A5   | 42         | 4  | 0.52 | 0.12 | SW:AAAT_HUMAN Q15758 homo sapiens (human). neutral amino acid transporter b(0) (atb(0)). 12/1998 [MASS=56621]/Solute carrier family 1 member 5, a sodium-dependent neutral amino acid transporter that comprises the amino acid transport system B(0), acts as a cell-surface receptor for RD114/simian type D                                                                                                                                                                                               |
| SW:GLYG_HUMAN  | GYG      | 5, 18      | 6  | 0.51 | 0.11 | SW:GLYG_HUMAN P46976 homo sapiens (human). glycogenin-1 (ec 2.4.1.186). 7/1999 [MASS=37347]/Glycogenin (glycogenin glucosyltransferase), autocatalytic and self-glucosylating enzyme that primes de novo glycogen synthesis                                                                                                                                                                                                                                                                                  |
| SW:SYTC_HUMAN  | TARS     | 2, 35, 37  | 4  | 0.51 | 0.06 | SW:SYTC_HUMAN P26639 homo sapiens (human). threonyl-trna synthetase, cytoplasmic (ec 6.1.1.3) (threonine--trna ligase) (thrrs). 6/1994 [MASS=82124]/Threonyl-tRNA synthetase, a class II aminoacyl tRNA synthetase which aminoacylates its cognate tRNAs with threonine for protein synthesis, autoantigen in several autoimmune disorders                                                                                                                                                                   |
| PIR2:JC4775    | DNAJC3   | 10, 35, 41 | 2  | 0.51 | 0.27 | PIR2:JC4775 p58k protein - human [MASS=57580]/The 58,000-dalton cellular inhibitor of the interferon-induced double-stranded RNA-activated protein kinase (PKR) is a member of the tetratricopeptide repeat family of proteins/DnaJ (Hsp40) homolog subfamily C member 3 (protein kinase inhibitor p58), a member of the tetratricopeptide repeat family of proteins that may act as a cochaperone that inhibits the activity of double-stranded RNA-dependent protein kinase (PRKR)                         |
| SW:ANX4_HUMAN  | ANXA4    | 45         | 7  | 0.51 | 0.06 | SW:ANX4_HUMAN P09525 homo sapiens (human). annexin iv (lipocortin iv) (endonexin i) (chromobindin 4) (protein ii) (p32.5) (placental anticoagulant protein ii) (pap-ii) (pp4-x) (35-beta calcimedlin) (carb [MASS=35752]/ membrane aggregation/Annexin IV, a calcium-dependent phospholipid-binding protein involved in regulation of transmembrane conductance and endocytosis, inhibits phospholipase A2, and has in vitro anticoagulation activity, may confer paclitaxel resistance to cancer cell lines |

|               |          |            |    |      |      |                                                                                                                                                                                                                                                                                                                                                                                                                                                                                                                                                                                                               |
|---------------|----------|------------|----|------|------|---------------------------------------------------------------------------------------------------------------------------------------------------------------------------------------------------------------------------------------------------------------------------------------------------------------------------------------------------------------------------------------------------------------------------------------------------------------------------------------------------------------------------------------------------------------------------------------------------------------|
| SW:ADG_HUMAN  | ADTG     | 43         | 4  | 0.51 | 0.13 | SW:ADG_HUMAN O43747 homo sapiens (human). gamma-adaptin (golgi adaptor ha1/ap1 adaptin gamma subunit) (clathrin assembly protein complex 1 gamma large chain). 7/1999 [MASS=91592]/Adaptor-related protein complex 1 gamma 1 subunit, promotes the formation of clathrin coated vesicles and pits for intracellular transport; deletion of the corresponding gene occurs in Wilm's tumor, prostate adenocarcinomas, and hepatocellular carcinomas                                                                                                                                                             |
| GP:AB007851_1 | PRPSAP2  | 25         | 4  | 0.51 | 0.10 | GP:AB007851_1 Homo sapiens mRNA for 41-kDa phosphoribosylpyrophosphate synthetase-associated protein, complete cds. [MASS=40926]/Phosphoribosyl pyrophosphate synthetase-associated protein 2, a component of phosphoribosylpyrophosphate (PRPP) synthetase that is related to the other components of PRPP synthetase (PRPS1, PRPS2 and PRPSAP1)                                                                                                                                                                                                                                                             |
| SW:RB3B_HUMAN | RAB3B    | 21, 43     | 2  | 0.50 | 0.00 | SW:RB3B_HUMAN P20337 homo sapiens (human). ras-related protein rab-3b. 10/1994 [MASS=24760]/Ras-related GTP-binding protein 3b, a GTP-binding protein and GTPase that is involved in exocytosis                                                                                                                                                                                                                                                                                                                                                                                                               |
| GP:AF061258_1 | LIM      | 41         | 1  | 0.50 | 0.00 | GP:AF061258_1 Homo sapiens LIM protein mRNA, complete cds. [MASS=64028]/ similar to rat protein kinase C-binding enigma/Enigma homolog, contains LIM domains, binds oncoprotein Ret and may bind protein kinase C, may mediate Ret mitogenic signaling                                                                                                                                                                                                                                                                                                                                                        |
| GPN:U48734_1  | ACTN4    | 11         | 8  | 0.50 | 0.03 | alpha-actinin 4 (non-muscle alpha-actinin 4) (f-actin cross linking protein)/Alpha-actinin, a non-muscle cell actin-binding protein that has a role in endocytosis; a tumor suppressor, prognostic marker for breast cancer and mutations in the gene cause familial focal segmental glomerulosclerosis                                                                                                                                                                                                                                                                                                       |
| SW:PROC_HUMAN | PYCR1    | 2          | 1  | 0.50 | 0.00 | SW:PROC_HUMAN P32322 homo sapiens (human). pyrroline-5-carboxylate reductase (ec 1.5.1.2) (p5cr) (p5c reductase). 7/1999 [MASS=33375]/Pyrroline-5-carboxylate reductase 1, catalyzes the NAD(P)H dependent reduction of pyrroline-5-carboxylate to proline in the final step of proline synthesis, may also function NADP+ production in erythrocytes                                                                                                                                                                                                                                                         |
| SW:PHS3_HUMAN | PYGB     | 5, 18      | 10 | 0.48 | 0.06 | SW:PHS3_HUMAN P11216 homo sapiens (human). glycogen phosphorylase, brain form (ec 2.4.1.1). 10/1996 [MASS=96683]/Brain glycogen phosphorylase, catalyzes the rate-limiting step in glycogen catabolism, activated by AMP and phosphorylation, may play a role in intestinal development; associated with gastric carcinomas displaying a differentiated intestinal phenotype                                                                                                                                                                                                                                  |
| PIR2:T00261   | KIAA0603 | 45         | 2  | 0.48 | 0.01 | PIR2:T00261 hypothetical protein KIAA0603 - human [MASS=146606]/ contains a Phosphotyrosine-binding domain, phosphotyrosine-interaction (PI) domain; PTB/PI domain structure similar to those of pleckstrin homology (PH) and IRS-1-like PTB domains. / contains a TBC, TBC domain. Identification of a TBC domain in GYP6_YEAST and GYP7_YEAST, which are GTPase activator proteins of yeast Ypt6 and Ypt7, imply that these domains are GTPase activator proteins of Rab-like small GTPases/KIAA0603 gene product, contains a TBC domain similar to that found in the deubiquitinating enzyme USP6 oncogene |
| SW:B2MG_HUMAN | B2M      | 45         | 6  | 0.48 | 0.08 | SW:B2MG_HUMAN P01884 homo sapiens (human), pan troglodytes (chimpanzee), and gorilla gorilla gorilla (lowland gorilla). beta-2-microglobulin precursor. 5/2000 [MASS=13715]/Beta 2-microglobulin, component of class I major histocompatibility antigen that bind and present antigenic peptides to cytotoxic T lymphocytes (CTLs), major component of hemodialysis-associated amyloid fibrils, associated with cancer progression                                                                                                                                                                            |
| SW:CRP2_HUMAN | CRIP2    | 45         | 1  | 0.48 | 0.00 | SW:CRP2_HUMAN P52943 homo sapiens (human). cysteine-rich protein 2 (crp2) (esp1 protein). 11/1997 [MASS=22493]/ CONTAINS 2 LIM DOMAINS. THE LIM DOMAIN BINDS 2 ZINC IONS                                                                                                                                                                                                                                                                                                                                                                                                                                      |
| GP:AB029020_1 | VDU1     | 32         | 1  | 0.48 | 0.00 | GP:AB029020_1 Homo sapiens mRNA for KIAA1097 protein, partial cds. [MASS=110942]/ Similar to ubiquitin specific protease 20/Member of the ubiquitin carboxyl-terminal hydrolase family 2, contains a ubiquitin carboxyl-terminal hydrolases family 2 domain and a Zn-finger in ubiquitin-hydrolases and other proteins domain, has a region of low similarity to a region of human USP4                                                                                                                                                                                                                       |
| SW:AAK1_HUMAN | PRKAA1   | 34, 41     | 2  | 0.47 | 0.00 | SW:AAK1_HUMAN Q13131 homo sapiens (human). 5'-amp-activated protein kinase, catalytic alpha-1 chain (ec 2.7.1.-) (ampk alpha-1 chain) (fragment). 7/1999 [MASS=19837]/AMP-activated protein kinase (alpha 1 catalytic subunit), a metabolic sensor of AMP levels, may have roles in signal transduction, may regulate the cystic fibrosis transmembrane conductance regulator (CFTR)                                                                                                                                                                                                                          |
| GP:AF015926_1 | SLC9A3R1 | 31, 36, 42 | 1  | 0.47 | 0.00 | Solute carrier family 9 isoform 3 regulatory factor 1 (sodium-hydrogen exchanger-regulatory factor), a cytoskeleton-linking protein that forms multiprotein complexes with members of the Ezrin-Radixin-Moesin family via two PDZ domains                                                                                                                                                                                                                                                                                                                                                                     |
| PIR2:A49674   | FLII     | 45         | 2  | 0.47 | 0.04 | PIR2:A49674 flightless-I homolog - human (fragment) [MASS=144620]/Flightless I homolog (Drosophila), actin binding protein of the gelsolin family, interacts with other proteins including the repressor LRRFIP1, may function in signal transduction; gene maps within Smith Magenis syndrome microdeletion critical region                                                                                                                                                                                                                                                                                  |
| GP:AB018298_1 | SEC24D   | 43         | 1  | 0.47 | 0.00 | sec24-related protein D (human)/Protein with high similarity to SEC24 (S. cerevisiae) related gene family member C (human SEC24C), which is a putative COPII vesicle coat protein that forms a complex with Sec23Ap (human SEC23) and functions in ER-Golgi transport                                                                                                                                                                                                                                                                                                                                         |
| SW:ATS1_HUMAN | ADAMTS1  | 41         | 5  | 0.47 | 0.18 | SW:ATS1_HUMAN Q9uhi8 homo sapiens (human). adam-ts 1 precursor (ec 3.4.24.-) (a disintegrin and metalloproteinase with thrombospondin motifs 1) (adamts-1) (adam-ts1) (meth-1). 5/2000 [MASS=103498]/A disintegrin metalloproteinase with a thrombospondin type 1 motif 1, a putative heparin-binding metalloproteinase that inhibits endothelial cell proliferation, involved in angiogenesis; mouse Adamts1 may play a role in the pathogenesis of cancer cachexia                                                                                                                                          |
| PIR2:JC6523   | PSMD12   | 32         | 1  | 0.47 | 0.00 | PIR2:JC6523 26S proteasome regulatory complex chain p55 - human [MASS=52904]/Proteasome (prosome, macropain) 26S subunit (non-ATPase, 12), a regulatory subunit of the 26S proteasome                                                                                                                                                                                                                                                                                                                                                                                                                         |
| GP:U83668_1   | TUBB4Q   | 11         | 1  | 0.47 | 0.00 | GP:U83668_1 Human beta-tubulin (TUB4q) gene, complete cds. [MASS=48377]/Protein of beta-tubulin subfamily, has similarity to beta2-tubulin (TUBB2), may have a role in the pathogenesis of facioscapulohumeral muscular dystrophy (FSHD1)                                                                                                                                                                                                                                                                                                                                                                     |

|                |          |           |   |      |      |                                                                                                                                                                                                                                                                                                                                                                                                                                                                                                           |
|----------------|----------|-----------|---|------|------|-----------------------------------------------------------------------------------------------------------------------------------------------------------------------------------------------------------------------------------------------------------------------------------------------------------------------------------------------------------------------------------------------------------------------------------------------------------------------------------------------------------|
| PIR2:T17320    | unknown  | 45        | 2 | 0.46 | 0.04 | PIR2:T17320 hypothetical protein DKFZp564J0863.1 - human (fragment) [MASS=61969]/ similar to Mus musculus ARL-6 interacting protein-2 (Aip-2)/ similar to GBP, Guanylate-binding protein, N-terminal domain. Transcription of the anti-viral guanylate-binding protein (GBP) is induced by interferon-gamma during macrophage induction. This family contains GBP1 and GPB2, both GTPases capable of binding GTP, GDP and GMP.                                                                            |
| SW:HS7C_HUMAN  | HSPA8    | 33        | 6 | 0.46 | 0.06 | SW:HS7C_HUMAN P11142 homo sapiens (human). heat shock cognate 71 kda protein. 12/1998 [MASS=70898]/Heat shock 70kD protein 8, a constitutively expressed member of the heat shock HSP70 family of molecular chaperones; expression is elevated in the hearts of patients with hypertrophic cardiomyopathy                                                                                                                                                                                                 |
| SW:LDHM_HUMAN  | LDHA     | 5         | 5 | 0.46 | 0.14 | SW:LDHM_HUMAN P00338 homo sapiens (human). l-lactate dehydrogenase m chain (ec 1.1.1.27) (ldh-a). 2/1996 [MASS=36558]/Lactate dehydrogenase muscle subunit, catalyzes the reversible NAD-dependent interconversion of pyruvate to L-lactate in glycolysis; mutations in the corresponding gene cause LDH-A deficiency                                                                                                                                                                                     |
| GP:U85992_1    | unknown  | 45        | 1 | 0.45 | 0.00 | GP:U85992_1 Human clone IMAGE:35527 unknown protein mRNA, partial cds. [MASS=19006]/ similar to ryanodine receptor, calcium release channel                                                                                                                                                                                                                                                                                                                                                               |
| SW:Y274_HUMAN  | SAC3     | 42        | 1 | 0.45 | 0.00 | SW:Y274_HUMAN Q92562 homo sapiens (human). hypothetical protein k1aa0274. 7/1998 [MASS=103635]/Protein containing two Sac1 homology domains, has a region of low similarity to suppressor of actin 1 (rat Sacm1), which is an integral membrane lipid phosphatase that acts on PI 3 phosphate, PI 4 phosphate, and PI 3,5 bisphosphate                                                                                                                                                                    |
| GP:AB015019_1  | BAIAP2   | 16        | 1 | 0.45 | 0.00 | GP:AB015019_1 Homo sapiens mRNA for BAP2-alpha protein, complete cds; BAI-associated protein 2(BAP2) -alpha; alternative splicing: see also AB015020. [MASS=57359]/Brain-specific angiogenesis inhibitor 1-associated protein 2, interacts with cytoplasmic portion of BAI1, may be a substrate for INSR, involved in cytoskeletal organization and lamellipodia and filopodia formation                                                                                                                  |
| SW:ACLY_HUMAN  | ACLY     | 5, 19, 25 | 6 | 0.44 | 0.09 | SW:ACLY_HUMAN P53396 homo sapiens (human). atp-citrate (pro-s-)-lyase (ec 4.1.3.8) (citrate cleavage enzyme). 10/1996 [MASS=121420]/ATP citrate lyase, catalyzes the formation of acetyl-CoA and oxaloacetate from citrate and CoA with the concomitant hydrolysis of ATP to ADP and phosphate, involved in cholesterol and fatty acid synthesis, nutritionally regulated                                                                                                                                 |
| SW:COMT_HUMAN  | COMT     | 26        | 4 | 0.44 | 0.19 | SW:COMT_HUMAN P21964 homo sapiens (human). catechol o-methyltransferase, membrane-bound form (ec 2.1.1.6) (mb-comt) [contains: catechol o-methyltransferase, soluble form (s-comt)]. 5/2000 [MASS=30037]/Catechol-O-methyltransferase, a methyltransferase involved in the degradation of catecholamine neurotransmitters and catechol drugs, variant forms are associated with increased risks for obsessive-compulsive disorder and schizophrenia                                                       |
| SW:SNAG_HUMAN  | NAPG     | 21, 43    | 2 | 0.43 | 0.31 | SW:SNAG_HUMAN Q99747 homo sapiens (human). gamma-soluble nsf attachment protein (snap-gamma). 7/1999 [MASS=34746]/N-ethylmaleimide-sensitive factor (NSF) attachment protein gamma, member of a family of proteins involved in membrane fusion during exocytosis, may have roles in platelet exocytosis and in the attachment of mitochondria to the cytoskeleton                                                                                                                                         |
| GP:AB040955_1  | KIAA1522 | 45        | 1 | 0.43 | 0.00 | GP:AB040955_1 Homo sapiens mRNA for KIAA1522 protein, partial cds; Start codon is not identified. fh14706 cDNA clone for KIAA1522 has a 241-bp deletion at the position between 1701 and 1943 of the sequence of KIAA1522.. [MASS=107934]/Protein of unknown function, has a region of weak similarity to a region of heavy polypeptide of neurofilament (mouse Nfh), which is a cytoskeleton structural protein that may regulate axon caliber, synaptic transmission and intermediate filament assembly |
| PIR2:S71949    | ADAM12   | 45        | 4 | 0.43 | 0.01 | PIR2:S71949 metalloproteinase 12 (EC 3.4.24.-) precursor - human [MASS=72759]/Meltrin alpha, member of the metalloproteinase-disintegrin family, metalloproteinase involved in cell adhesion and muscle cell differentiation and fusion                                                                                                                                                                                                                                                                   |
| SW:SAH2_HUMAN  | AHCYL1   | 26        | 2 | 0.43 | 0.04 | SW:SAH2_HUMAN O43865 homo sapiens (human). putative adenosylhomocysteinase (ec 3.3.1.1) (s-adenosyl-l-homocysteine hydrolase) (adohcycase). 12/1998 [MASS=55628]/Protein with high similarity to s-adenosylhomocysteine hydrolase (mouse Ahcy), which reversably converts S-adenosylhomocysteine to adenosine and homocysteine and may be associated with epilepsy, member of the S-adenosylhomocysteine hydrolase family                                                                                 |
| GP:AC011001_19 | unknown  | 45        | 1 | 0.41 | 0.00 | GP:AC011001_19 Arabidopsis thaliana chromosome I BAC F4H5 genomic sequence, complete sequence; Putative membrane protein; Similar to predicted proteins in yeast, human and Drosophila. Predicted to be a membrane protein. [MASS=130186]/similar to GASTRIN/CHOLECYSTOKININ TYPE B RECEPTOR (CCK-B RECEPTOR) (CCK-BR)                                                                                                                                                                                    |
| SW:FLOH_HUMAN  | SLC19A2  | 42        | 3 | 0.41 | 0.05 | SW:FLOH_HUMAN O60779 homo sapiens (human). folate-like transporter dj206d15.1 on chromosome 1 (fragment). 7/1999 [MASS=52323]/Solute carrier family 19 member 2, functions as a thiamine transporter; mutations in the gene are associated with thiamine responsive megaloblastic anemia (TRMA) often combined with diabetes mellitus and deafness                                                                                                                                                        |
| SW:COA1_HUMAN  | ACACA    | 19        | 2 | 0.41 | 0.05 | SW:COA1_HUMAN Q13085 homo sapiens (human). acetyl-coa carboxylase 1 (ec 6.4.1.2) (acc-alpha) [includes: biotin carboxylase (ec 6.3.4.14)]. 7/1999 [MASS=265040]/Acetyl-Coenzyme A carboxylase alpha, catalyzes the rate-limiting step in long-chain fatty acid biogenesis; deficiency leads to defects in fatty acid synthesis                                                                                                                                                                            |
| SW:RS12_HUMAN  | RPS12    | 35        | 2 | 0.40 | 0.09 | SW:RS12_HUMAN P25398 homo sapiens (human). 40s ribosomal protein s12. 5/2000 [MASS=14395]/Ribosomal protein S12, a component of the small 40S ribosomal subunit; overexpressed in colorectal cancer                                                                                                                                                                                                                                                                                                       |
| GP:AB020706_1  | AP2A2    | 45        | 1 | 0.38 | 0.00 | GP:AB020706_1 Homo sapiens mRNA for KIAA0899 protein, partial cds. [MASS=102986]/ADAPTER-RELATED PROTEIN COMPLEX 2 ALPHA 2 SUBUNIT/Alpha-adaptin-C, a protein that interacts with the polyglutamine-containing protein called huntingtin (HD) which is associated with Huntington's disease                                                                                                                                                                                                               |
| GP:AJ239387_1  | IGHV     | 45        | 1 | 0.37 | 0.00 | GP:AJ239387_1 Homo sapiens mRNA for immunoglobulin heavy chain variable region, ID 81; ID 81. [MASS=13150]                                                                                                                                                                                                                                                                                                                                                                                                |
| SW:ERG7_HUMAN  | LSS      | 19        | 1 | 0.37 | 0.00 | SW:ERG7_HUMAN P48449 homo sapiens (human). lanosterol synthase (ec 5.4.99.7) (oxidosqualene-lanosterol cyclase) (2,3-epoxysqualene-lanosterol cyclase) (osc). 5/2000 [MASS=83309]/Lanosterol synthase, catalyzes the cyclization of (S)-2,3-oxidosqualene forming lanosterol in sterol biosynthesis                                                                                                                                                                                                       |
| SW:PHS2_HUMAN  | PYGM     | 5, 18     | 1 | 0.36 | 0.00 | SW:PHS2_HUMAN P11217 homo sapiens (human). glycogen phosphorylase, muscle form (ec 2.4.1.1) (myophosphorylase). 5/2000 [MASS=97092]/Muscle glycogen phosphorylase, participates in glycogen catabolism; mutation of corresponding gene is associated with McArdle disease                                                                                                                                                                                                                                 |

|                |          |                |    |      |      |                                                                                                                                                                                                                                                                                                                                                                                                                                                                                      |
|----------------|----------|----------------|----|------|------|--------------------------------------------------------------------------------------------------------------------------------------------------------------------------------------------------------------------------------------------------------------------------------------------------------------------------------------------------------------------------------------------------------------------------------------------------------------------------------------|
| SW:HPS1_HUMAN  | ABHD2    | 16             | 1  | 0.36 | 0.00 | SW:HPS1_HUMAN P08910 homo sapiens (human). protein phps1-2. 11/1997 [MASS=48315]/Member of the alpha/beta hydrolase fold family, has a region with weak similarity to a region of <i>S. cerevisiae</i> Eht1p (alcohol acyl transferase)                                                                                                                                                                                                                                              |
| SW:DHSO_HUMAN  | SORD     | 5              | 11 | 0.36 | 0.09 | SW:DHSO_HUMAN Q00796 homo sapiens (human). sorbitol dehydrogenase (ec 1.1.1.14) (l-iditol 2-dehydrogenase). 7/1999 [MASS=38165]/Sorbitol dehydrogenase, an enzyme of the polyol pathway which catalyzes the conversion of sorbitol to fructose; may be involved in the development of diabetic complications; deficiency may be associated with some forms of congenital cataracts                                                                                                   |
| GP:AK026904_1  | FLJ23251 | 45             | 2  | 0.35 | 0.01 | contains a repeated domain in ubiquitin activating enzyme E1 and members of the bacterial ThiF/MoeB/HesA family/Member of the UBA-THIF-type NAD-FAD binding fold family, has a region of low similarity to a region of <i>S. pombe</i> Uba2p, which is required for the activation of the ubiquitin-like <i>S. pombe</i> Ubl2p for conjugation to other enzymes                                                                                                                      |
| SW:RRAS_HUMAN  | RRAS     | 41             | 3  | 0.35 | 0.01 | SW:RRAS_HUMAN P10301 homo sapiens (human). ras-related protein r-ras (p23). 11/1997 [MASS=23480]/Related RAS viral oncogene homolog, inhibits apoptosis through BCL2 or Bcl-xl (BCL2L1), mediates myoblast differentiation, acts as a downstream effector of GRF2 in the activation of JNK, enhances cell-matrix adhesion by modulating integrins                                                                                                                                    |
| GP:AJ245222_1  | IGHV3-7  | 45             | 1  | 0.34 | 0.00 | GP:AJ245222_1 Homo sapiens mRNA for immunoglobulin gamma heavy chain variable region, partial, clone 2A-3G17. [MASS=13498]                                                                                                                                                                                                                                                                                                                                                           |
| SW:FAS_HUMAN   | FASN     | 19             | 90 | 0.34 | 0.15 | SW:FAS_HUMAN P49327 homo sapiens (human). fatty acid synthase (ec 2.3.1.85) [includes: ec 2.3.1.38; ec 2.3.1.39; ec 2.3.1.41; ec 1.1.1.100; ec 4.2.1.61; ec 1.3.1.10; ec 3.1.2.14]. 7/1999 [MASS=273102]/Fatty acid synthase, multifunctional enzyme that synthesizes fatty acids from dietary proteins and carbohydrates; increased expression is associated with tumor growth and development, expression may serve as a prognostic maker for breast cancer                        |
| SWN:AKT3_HUMAN | AKT3     | 34, 41         | 1  | 0.33 | 0.00 | SWN:AKT3_HUMAN Q9y243 homo sapiens (human). rac-gamma serine/threonine protein kinase (ec 2.7.1.-) (rac-pk-gamma) (protein kinase akt-3) (protein kinase b, gamma) (pkb gamma). 8/2001 [MASS=55775]/Protein kinase B gamma, a serine/threonine protein kinase that is activated by growth factors and 3-phosphoinositide; insulin-induced activity is upregulated in estrogen receptor negative breast cancer and androgen insensitive prostate carcinoma                            |
| SW:IMA1_HUMAN  | KPNA1    | 24, 25, 36, 40 | 1  | 0.33 | 0.00 | SW:IMA1_HUMAN P52294 homo sapiens (human). importin alpha-1 subunit (karyopherin alpha-1 subunit) (srp1-beta) (rag cohort protein 2) (nucleoprotein interactor 1) (npi-1). 12/1998 [MASS=60307]/Karyopherin alpha (importin alpha), a subunit of the nuclear localization sequence (NLS) receptor complex that binds to and mediates the nuclear import of RAG1 and STAT1                                                                                                            |
| GP:AK025588_1  | EPS8R2   | 45             | 3  | 0.33 | 0.04 | GP:AK025588_1 Homo sapiens cDNA: FLJ21935 fis, clone HEP04373; unnamed protein product. [MASS=83792]/ contains a SH3 domain/ similar to epidermal growth factor receptor pathway substrate 8 /Protein containing an Src homology 3 (SH3) domain, which bind proline-rich peptides, has moderate similarity to human EPS8, which is tyrosine-phosphorylated by epidermal growth factor receptor (human EGFR) and enhances EGF -dependent mitogenic signals                            |
| SW:ACDV_HUMAN  | ACADVL   | 18, 19         | 1  | 0.32 | 0.00 | SW:ACDV_HUMAN P49748 homo sapiens (human). acyl-coa dehydrogenase, very-long-chain specific, mitochondrial precursor (ec 1.3.99.-) (vlcad). 5/2000 [MASS=70390]/Very long chain acyl-coenzyme A dehydrogenase, oxidizes straight chain acyl-CoAs in the initial step of fatty acid beta-oxidation, severe deficiency results in infant cardiomyopathy with high mortality, mild deficiency results in hypoketotic hypoglycemia                                                       |
| SW:TNRC_HUMAN  | LTBR     | 41             | 1  | 0.32 | 0.00 | SW:TNRC_HUMAN P36941 homo sapiens (human). lymphotoxin-beta receptor precursor (tumor necrosis factor receptor 2 related protein) (tumor necrosis factor c receptor). 11/1997 [MASS=46709]/Lymphotoxin beta receptor, member of the tumor necrosis factor receptor family that specifically binds lymphotoxin-alpha/beta heterotrimers and mediates cytotoxic responses, may be involved in lymph gland development or organization                                                  |
| SW:143E_HUMAN  | YWHAE    | 41             | 1  | 0.31 | 0.00 | SW:143E_HUMAN P42655 homo sapiens (human), mus musculus (mouse), rattus norvegicus (rat), bos taurus (bovine), and ovis aries 14-3-3 protein epsilon (mitochondrial import stimulation factor I subunit) ( [MASS=29174]/14-3-3 epsilon, may regulate the cell cycle by binding cdc25 phosphatases and linking cell cycle machinery with mitogenic signaling, binds DNA topoisomerase II alpha (TOP2A), prevents TOP2A binding of DNA and renders cells resistant to anticancer drugs |
| SW:RIN1_HUMAN  | RIN1     | 41             | 1  | 0.31 | 0.00 | SW:RIN1_HUMAN Q13671 homo sapiens (human). ras interaction/interference protein 1 (ras inhibitor jc99) (fragment). 11/1997 [MASS=52857]/Ras inhibitor 1, inhibits Ras (HRAS) - mediated transformation and may be regulated by serine phosphorylation and 14-3-3 protein binding; augments BCR-ABL oncogenic activity and is amplified in some oral squamous cell carcinomas                                                                                                         |
| GP:AK022527_1  | FLJ12465 | 45             | 2  | 0.30 | 0.05 | GP:AK022527_1 Homo sapiens cDNA FLJ12465 fis, clone NT2RM1000802; unnamed protein product. [MASS=103079] similar to Peptidase_C2, Calpain family cysteine protease/A Novel Gene ' Niban ' Upregulated in Renal Carcinogenesis/Protein of unknown function, has high similarity to uncharacterized rat Niban                                                                                                                                                                          |
| GP:D89053_1    | FACL3    | 19             | 13 | 0.29 | 0.13 | fatty-acid-Coenzyme A ligase, long-chain 3 /Fatty acid Coenzyme A ligase long chain 3, a putative long-chain fatty-acyl-CoA synthetase that may function in lipid synthesis and fatty acid degradation                                                                                                                                                                                                                                                                               |
| SW:FKB5_HUMAN  | FKBP5    | 33, 41         | 1  | 0.28 | 0.00 | SW:FKB5_HUMAN Q13451 homo sapiens 51 kda fk506-binding protein (fkbp51) (peptidyl-prolyl cis-trans isomerase) (ec 5.2.1.8) (ppiase) (rotamase) (54 kda progesterone receptor-associated immunophilin) (fkb [MASS=51212]/FK506-binding protein 5, a peptidylprolyl cis-trans isomerase and member of the immunophilin family of FK506-binding proteins, forms a progesterone receptor complex with Hsp90 and p23, serves as a chaperone and mediates inhibition of calcineurin        |
| SW:TRFL_HUMAN  | LTF      | 26, 42         | 2  | 0.28 | 0.03 | SW:TRFL_HUMAN P02788 homo sapiens (human). lactotransferrin precursor (lactoferrin). 7/1999 [MASS=78338]/Lactotransferrin, a member of the transferrin family, transports iron in extracellular fluid and may have serine protease activity, has antimicrobial, antifungal, and antiviral activity, potential therapeutic or diagnostic target for autoimmune diseases                                                                                                               |



|                |          |        |    |      |      |                                                                                                                                                                                                                                                                                                                                                                                                                                                                                                                                                                                                                                                                                                                        |
|----------------|----------|--------|----|------|------|------------------------------------------------------------------------------------------------------------------------------------------------------------------------------------------------------------------------------------------------------------------------------------------------------------------------------------------------------------------------------------------------------------------------------------------------------------------------------------------------------------------------------------------------------------------------------------------------------------------------------------------------------------------------------------------------------------------------|
| SW:TRAL_HUMAN  | HSP75    | 10, 33 | 1  | 0.28 | 0.00 | SW:TRAL_HUMAN Q12931 homo sapiens (human). tumor necrosis factor type 1 receptor associated protein (trap-1) (fragment). 5/2000 [MASS=75342]/Heat shock protein 75, member of the HSP90 family of molecular chaperones, binds and refolds denatured retinoblastoma (RB1) protein during M phase and after heat shock, binds the intracellular domain of tumor necrosis factor receptor type 1                                                                                                                                                                                                                                                                                                                          |
| GP:AB037745_1  | KIAA1324 | 45     | 1  | 0.28 | 0.00 | GP:AB037745_1 Homo sapiens mRNA for KIAA1324 protein, partial cds; Start codon is not identified.. [MASS=63365]                                                                                                                                                                                                                                                                                                                                                                                                                                                                                                                                                                                                        |
| GPN:AL136939_1 | ELOVL2   | 45     | 1  | 0.28 | 0.00 | [FUNCTION] AFFECTS PLASMA MEMBRANE H+-ATPASE ACTIVITY. MAY ACT ON A GLUCOSE-SIGNALING PATHWAY THAT CONTROLS THE EXPRESSION OF SEVERAL GENES THAT ARE TRANSCRIPTIONALLY REGULATED BY GLUCOSE SUCH AS PMA1,HXT3 AND SNF3.[SUBCELLULAR LOCATION] INTEGRAL MEMBRANE PROTEIN (PROBABLE).[SIMILARITY] BELONGS TO GNS1/SUR4/YJL196C/C40H1.4 FAMILY./Elongation of very long chain fatty acids-like 2, protein with strong similarity to murine Ssc2, which is a member of a family of enzymes involved in tissue specific biosynthesis of very long chain fatty acids and sphingolipids                                                                                                                                       |
| SW:DIMH_HUMAN  | DHCR24   | 45     | 2  | 0.28 | 0.00 | diminuto-like protein /24-dehydrocholesterol reductase, catalyzes the reduction of the delta (24) double bond of sterols in cholesterol biosynthesis, blocks apoptosis after oxidative stress and APP -induced toxicity; gene mutation is detected in desmosterolosis                                                                                                                                                                                                                                                                                                                                                                                                                                                  |
| GPN:Y14436_1   | PPAP2A   | 16, 19 | 2  | 0.27 | 0.02 | type-2 phosphatidic acid phosphatase alpha-1 /Phosphatidic acid phosphatase type 2a, catalyzes the dephosphorylation of various lipid phosphates, regulates the level of lipid phosphates which are involved in signal transduction                                                                                                                                                                                                                                                                                                                                                                                                                                                                                    |
| PIR2:T34532    | MICAL    | 45     | 1  | 0.27 | 0.00 | PIR2:T34532 hypothetical protein DKFZp434B1517.1 - human (fragment) [MASS=71502]CH, Calponin homology domain; Actin binding domains present in duplicate at the N-termini of spectrin-like proteins (including dystrophin, alpha-actinin/LIM, Zinc binding domain present in Lin-11, Isl-1, Mec-3.; Zinc-binding domain family. Some LIM domains bind protein partners via tyrosine-containing motifs. LIM domains are found in many key regulators of developmental pathways/Protein containing a calponin homology (CH) domain and LIM domains, has a region of moderate similarity to a region of beta spectrin (beta-fodrin, human SPTB), which is a component of the erythrocyte membrane-associated cytoskeleton |
| SW:41_HUMAN    | EPB41    | 11     | 2  | 0.27 | 0.00 | SW:41_HUMAN P11171 homo sapiens (human). protein 4.1 (band 4.1) (p4.1). 5/2000 [MASS=93239]/Erythrocyte membrane protein band 4.1, maintains cell shape by linking glycophorin C (GYPC) and band 3 proteins with the spectrin (SPTA1)-based cytoskeletal network; mutations in the corresponding gene are associated with hereditary elliptocytosis                                                                                                                                                                                                                                                                                                                                                                    |
| SW:IMB3_HUMAN  | KPNB3    | 24, 36 | 1  | 0.26 | 0.00 | SW:IMB3_HUMAN O00410 homo sapiens (human). importin beta-3 subunit (karyopherin beta-3 subunit) (ran-binding protein 5). 12/1998 [MASS=123630]/Karyopherin beta 3, a subunit of the nuclear localization signal receptor complex and plays a role in nuclear import of ribosomal proteins; inhibited by interaction with hepatitis C virus nonstructural protein 5A                                                                                                                                                                                                                                                                                                                                                    |
| GP:U35146_1    | KKIAMRE  | 16, 41 | 2  | 0.26 | 0.06 | GP:U35146_1 Human p56 protein kinase (KKIAMRE), complete cds; similar to human p42 KKIALRE gene, GenBank Accession Number X66358; these protein kinases have mutually exclusive expression in testis (p56 KKIAMRE) and ovary (p42 KKIALRE). [MASS=56019]/Cyclin-dependent kinase-like 2, putative protein kinase whose activity is stimulated by epidermal growth factor (EGF), may play a role in sex differentiation                                                                                                                                                                                                                                                                                                 |
| SW:NDR1_HUMAN  | NDRG1    | 10     | 4  | 0.26 | 0.05 | SW:NDR1_HUMAN Q92597 homo sapiens (human). ndrg1 protein (differentiation-related gene 1 protein) (drg1) (reducing agents and tunicamycin-responsive protein) (rtp) (nickel- specific induction protein ca [MASS=42835]/N-myc downstream regulated gene 1, induced by nickel, homocysteine, 2-mercaptoethanol, and tunicamycin, involved in cellular differentiation and negative control of cell proliferation, downregulated in a variety of cancers                                                                                                                                                                                                                                                                 |
| SW:PRCE_HUMAN  | PSMB5    | 32, 34 | 2  | 0.25 | 0.00 | SW:PRCE_HUMAN P28074 homo sapiens (human). proteasome epsilon chain precursor (ec 3.4.99.46) (macropain epsilon chain) (multicatalytic endopeptidase complex epsilon chain) (proteasome subunit x) (protea [MASS=22897]/Proteasome (prosome, macropain) subunit beta type 5, which is a multicatalytic proteinase complex involved in cellular protein degradation and antigen processing; may be competitively inhibited by the HIV1 protease inhibitor Ritonavir                                                                                                                                                                                                                                                     |
| SW:PROS_HUMAN  | KLK3     | 45     | 17 | 0.25 | 0.13 | SW:PROS_HUMAN P07288 homo sapiens (human). prostate specific antigen precursor (ec 3.4.21.77) (psa) (gamma-seminoprotein) (semenogelase) (seminin) (p-30 antigen). 7/1999 [MASS=28741]/Kallikrein 3, (prostate specific antigen), serine protease, dissolves seminal coagulum, may play a role in regulation of cell growth, may be involved in prostate cancer invasion and metastasis, used as marker to test for and monitor prostate cancer                                                                                                                                                                                                                                                                        |
| SW:FDFT_HUMAN  | FDFT1    | 19     | 1  | 0.22 | 0.00 | SW:FDFT_HUMAN P37268 homo sapiens (human). farnesyl-diphosphate farnesyltransferase (ec 2.5.1.21) (squalene synthetase) (sqs) (ss) (fpp:fpp farnesyltransferase). 10/1996 [MASS=48115]/Squalene synthase (farnesyl-diphosphate farnesyltransferase 1), catalyzes the conversion of farnesyl diphosphate to squalene in cholesterol biosynthesis, may be a potential target for cholesterol lowering therapy                                                                                                                                                                                                                                                                                                            |
| GP:AK000542_1  | FLJ20535 | 45     | 1  | 0.20 | 0.00 | GP:AK000542_1 Homo sapiens cDNA FLJ20535 fis, clone KAT11013; unnamed protein product. [MASS=75854] contains a Tetratricopeptide repeats Domain/Protein containing three TPR (tetratricopeptide repeat) domains, which may mediate protein-protein interactions                                                                                                                                                                                                                                                                                                                                                                                                                                                        |
| SW:CD9_HUMAN   | CD9      | 45     | 2  | 0.20 | 0.00 | SW:CD9_HUMAN P21926 homo sapiens (human). cd9 antigen (p24) (leukocyte antigen mic3) (motility-related protein) (mrp-1). 7/1999 [MASS=25285]/ CD9                                                                                                                                                                                                                                                                                                                                                                                                                                                                                                                                                                      |
| GP:AF029684_1  | IKKB     | 34, 41 | 1  | 0.19 | 0.00 | inhibitor of nuclear factor kappa b kinase beta subunit/Serine kinase that is a subunit of the I kappaB kinase (IKK) complex, phosphorylates I kappaB and activates NF-kappaB (RELA), activated by kinases NIK (MAP3K14) and MEKK1 (MAP3K1)                                                                                                                                                                                                                                                                                                                                                                                                                                                                            |
| PIR2:I38346    | TTN      | 11     | 1  | 0.18 | 0.00 | PIR2:I38346 elastic titin - human (fragment) [MASS=883024]/Titin, a large sarcomeric protein that extends from the I band to the Z disk of sarcomeres, maintains resting tension in muscle                                                                                                                                                                                                                                                                                                                                                                                                                                                                                                                             |
| GP:AC005278_12 | F15K9.12 | 45     | 1  | 0.17 | 0.00 | GP:AC005278_12 Arabidopsis thaliana chromosome 1 BAC F15K9 sequence, complete sequence; Contains similarity to transcription initiation factor IIE, alpha subunit gb X63468 from Homo sapiens.. [MASS=57306]                                                                                                                                                                                                                                                                                                                                                                                                                                                                                                           |

|                                                                                                      |                |    |    |      |      |                                                                                                                                                                                                                                                                                                                                                                                                                         |
|------------------------------------------------------------------------------------------------------|----------------|----|----|------|------|-------------------------------------------------------------------------------------------------------------------------------------------------------------------------------------------------------------------------------------------------------------------------------------------------------------------------------------------------------------------------------------------------------------------------|
| <b>GPN:AF099989_1</b>                                                                                | <b>STK39</b>   | 34 | 2  | 0.13 | 0.00 | STE20/SPS1-RELATED PROLINE-ALANINE RICH PROTEIN KINASE (STE-20RELATED KINASE) (DCHT) /Ste-20-related protein kinase, member of the STE20/SPS1 family, a serine/threonine kinase, activates p38 kinase, may respond to stress activated signals                                                                                                                                                                          |
| <b>SW:TMS2_HUMAN</b>                                                                                 | <b>TMPRSS2</b> | 45 | 10 | 0.12 | 0.05 | SW:TMS2_HUMAN O15393 homo sapiens (human). transmembrane protease, serine 2 (ec 3.4.21.-). 7/1998 [MASS=53847]/Transmembrane protease serine 2 (epitheliasin), a putative serine endopeptidase with transmembrane, LDLRA (LDL receptor class A) and SRCR (scavenger receptor cysteine-rich) domains; highly expressed in androgen-dependent prostate cancer                                                             |
| <b>SW:KLK2_HUMAN</b>                                                                                 | <b>KLK2</b>    | 32 | 1  | 0.12 | 0.00 | SW:KLK2_HUMAN P20151 homo sapiens (human). glandular kallikrein 2 precursor (ec 3.4.21.35) (tissue kallikrein) (prostate) (hgk-1). 10/1996 [MASS=28671]/Kallikrein 2, arginine selective serine protease, involved in activation of PSA (KLK3), may activate urokinase type plasminogen activator (PLAU), used as a marker with PSA (KLK3) to help discriminate between prostate cancer and benign prostate hyperplasia |
|                                                                                                      |                |    |    |      |      |                                                                                                                                                                                                                                                                                                                                                                                                                         |
| Bold Italics represents ICAT™ reagent labeled proteins that have ICAT™ reagent ratios = or > 4-fold. |                |    |    |      |      |                                                                                                                                                                                                                                                                                                                                                                                                                         |

| AccessID      | Gene    | Functional Group | XPRESS Count | d0:d8 ratio | d0:d8 StdDev | Description                                                                                                                                                                                                                                                                                                                                                                                                                                                                   |
|---------------|---------|------------------|--------------|-------------|--------------|-------------------------------------------------------------------------------------------------------------------------------------------------------------------------------------------------------------------------------------------------------------------------------------------------------------------------------------------------------------------------------------------------------------------------------------------------------------------------------|
| SW:PROS_HUMAN | KLK3    | 45               | 17           | 0.25        | 0.13         | SW:PROS_HUMAN P07288 homo sapiens (human). prostate specific antigen precursor (ec 3.4.21.77) (psa) (gamma-seminoprotein) (semenogelase) (seminin) (p-30 antigen). 7/1999 [MASS=28741]/Kallikrein 3, (prostate specific antigen), serine protease, dissolves seminal coagulum, may play a role in regulation of cell growth, may be involved in prostate cancer invasion and metastasis, used as marker to test for and monitor prostate cancer                               |
| SW:TMS2_HUMAN | TMPRSS2 | 45               | 10           | 0.12        | 0.05         | SW:TMS2_HUMAN O15393 homo sapiens (human). transmembrane protease, serine 2 (ec 3.4.21.-). 7/1998 [MASS=53847]/Transmembrane protease serine 2 (epitheliasin), a putative serine endopeptidase with transmembrane, LDLRA (LDL receptor class A) and SRCR (scavenger receptor cysteine-rich) domains; highly expressed in androgen-dependent prostate cancer                                                                                                                   |
| SW:FAS_HUMAN  | FASN    | 19               | 90           | 0.34        | 0.15         | SW:FAS_HUMAN P49327 homo sapiens (human). fatty acid synthase (ec 2.3.1.85) [includes: ec 2.3.1.38; ec 2.3.1.39; ec 2.3.1.41; ec 1.1.1.100; ec 4.2.1.61; ec 1.3.1.10; ec 3.1.2.14]. 7/1999 [MASS=273102]/Fatty acid synthase, multifunctional enzyme that synthesizes fatty acids from dietary proteins and carbohydrates; increased expression is associated with tumor growth and development, expression may serve as a prognostic maker for breast cancer                 |
| SW:LDLR_HUMAN | LDLR    | 19, 36, 43       | 3            | 0.55        | 0.04         | SW:LDLR_HUMAN P01130 homo sapiens (human). low-density lipoprotein receptor precursor (ldl receptor). 5/2000 [MASS=95376]/Low density lipoprotein receptor, mediates uptake of low density lipoproteins, involved in lipid metabolism; gene variations are associated with familial hypercholesterolemia, hypertension, atherosclerosis, and coronary artery disease                                                                                                          |
| SW:CTNB_HUMAN | CTNNB1  | 6, 11, 29, 41    | 19           | 0.79        | 0.26         | SW:CTNB_HUMAN P35222 homo sapiens (human). beta-catenin. 2/1996 [MASS=85497]/Beta catenin, links cadherins to the cytoskeleton, may act as a component of the Wnt signal transduction pathway transmitting nuclear signals via a complex with LEF1 and TCF transcription factors; mutations in the gene are associated with various cancers                                                                                                                                   |
| SW:P60_HUMAN  | HSPD1   | 33               | 22           | 1.69        | 0.31         | SW:P60_HUMAN P10809 homo sapiens (human). mitochondrial matrix protein p1 precursor (p60 lymphocyte protein) (60 kda chaperonin) (heat shock protein 60) (hsp-60) (protein cpn60) (groel protein) (hucha60 [MASS=61055]/Chaperonin 60, mitochondrial matrix protein induced by stress, component of the chaperonin complex that is implicated in mitochondrial protein folding and function, induced by inflammatory and immune responses, and implicated in coronary disease |

Panel 3, pg 60

| AccessID      | Gene   | Peptide                          | XPRESS | Description                                                                                                                                                                                                                                                                                                                                                                                                |
|---------------|--------|----------------------------------|--------|------------------------------------------------------------------------------------------------------------------------------------------------------------------------------------------------------------------------------------------------------------------------------------------------------------------------------------------------------------------------------------------------------------|
| GP:AF024636_1 | STK24  | K.MKDIPKRPFSQC*LSTIISPLFAELKEK.S | 0.59   | GP:AF024636_1 Homo sapiens STE20-like kinase 3 (mst-3) mRNA, complete cds; protein serine/threonine kinase; similar to yeast STE20. [MASS=47941]/Serine-threonine kinase 24 (Ste20 yeast homolog), member of the SPS1 subgroup of the STE20-like protein family, a serine-threonine kinase that prefers manganese as a cofactor and uses either GTP or ATP as a phosphate donor                            |
| SW:FASA_HUMAN | TNFSF6 | N.LEGLHHDGQFC*HKPC*PPGER.K       | 1.06   | SW:FASA_HUMAN P25445 homo sapiens (human). fasl receptor precursor (apoptosis-mediating surface antigen fas) (apo-1 antigen) (cd95 antigen). 11/1997 [MASS=37732]/Apoptosis antigen ligand 1, a tumor necrosis factor alpha related cytokine that binds Fas and induces apoptosis, plays important roles in immune system development, immune response and tumorigenesis, may be a prognostic tumor marker |

| Cellular Process             | Gene  | Functional Group | XPRESS Count | d0:d8 ratio | d0:d8 StdDev |
|------------------------------|-------|------------------|--------------|-------------|--------------|
| <b>Aging</b>                 |       |                  |              |             |              |
| SW:SYV_HUMAN                 | VAR52 | 1                | 4            | 0.95        | 0.14         |
| <b>Amino Acid Metabolism</b> |       |                  |              |             |              |
| SW:PROC_HUMAN                | PYCR1 | 2                | 1            | 0.50        | 0.00         |
| SW:SYTC_HUMAN                | TARS  | 2                | 4            | 0.51        | 0.06         |
| SW:GLNA_HUMAN                | GLUL  | 2                | 1            | 0.53        | 0.00         |
| SW:SYG_HUMAN                 | GARS  | 2                | 1            | 0.69        | 0.00         |
| SW:SYD_HUMAN                 | DARS  | 2                | 4            | 0.77        | 0.15         |
| SW:SYA_HUMAN                 | AARS  | 2                | 1            | 0.83        | 0.00         |
| SW:SYR_HUMAN                 | RARS  | 2                | 7            | 0.84        | 0.08         |
| SW:SYM_HUMAN                 | MARS  | 2                | 9            | 0.87        | 0.18         |
| SW:SERC_HUMAN                | PSA   | 2                | 2            | 0.87        | 0.15         |
| PIR2:B55053                  | SCYE1 | 2                | 9            | 0.88        | 0.07         |
| GP:U66669_1                  | HIBCH | 2                | 1            | 0.91        | 0.00         |
| SW:SYEP_HUMAN                | EPRS  | 2                | 23           | 0.92        | 0.84         |
| SW:SYQ_HUMAN                 | QARS  | 2                | 2            | 0.94        | 0.20         |
| SW:SYK_HUMAN                 | KARS  | 2                | 7            | 1.01        | 0.18         |
| SW:SYI_HUMAN                 | IARS  | 2                | 9            | 1.10        | 0.16         |

|                                |       |   |    |      |      |
|--------------------------------|-------|---|----|------|------|
| SW:CBS_HUMAN                   | CBS   | 2 | 1  | 1.13 | 0.00 |
| SW:AATM_HUMAN                  | GOT2  | 2 | 4  | 1.21 | 0.02 |
| SW:ODB2_HUMAN                  | DBT   | 2 | 1  | 1.23 | 0.00 |
| SWN:SYFB_HUMAN                 | FRSB  | 2 | 4  | 1.25 | 0.44 |
| SW:DHE3_HUMAN                  | GLUD1 | 2 | 8  | 1.31 | 0.24 |
| SW:SERA_HUMAN                  | PHGDH | 2 | 44 | 1.36 | 0.41 |
| SW:IVD_HUMAN                   | IVD   | 2 | 1  | 1.37 | 0.00 |
| SW:SYN_HUMAN                   | NARS  | 2 | 4  | 1.42 | 0.19 |
| SW:G6PE_HUMAN                  | GDH   | 2 | 1  | 1.48 | 0.00 |
| SW:AOFB_HUMAN                  | MAOB  | 2 | 1  | 1.59 | 0.00 |
| SW:AOFA_HUMAN                  | MAOA  | 2 | 15 | 1.68 | 0.50 |
| SW:ASNS_HUMAN                  | ASNS  | 2 | 1  | 1.85 | 0.00 |
| SW:GLYM_HUMAN                  | SHMT2 | 2 | 8  | 1.98 | 0.70 |
| <b>Axonal Transport</b>        |       |   |    |      |      |
| SW:DYNA_HUMAN                  | DCTN1 | 4 | 1  | 0.98 | 0.00 |
| <b>Carbohydrate Metabolism</b> |       |   |    |      |      |
| SW:PHS2_HUMAN                  | PYGM  | 5 | 1  | 0.36 | 0.00 |

|               |         |   |    |      |      |
|---------------|---------|---|----|------|------|
| SW:DHSO_HUMAN | SORD    | 5 | 11 | 0.36 | 0.09 |
| SW:ACLY_HUMAN | ACLY    | 5 | 6  | 0.44 | 0.09 |
| SW:LDHM_HUMAN | LDHA    | 5 | 5  | 0.46 | 0.14 |
| SW:PHS3_HUMAN | PYGB    | 5 | 10 | 0.48 | 0.06 |
| SW:GLYG_HUMAN | GYG     | 5 | 6  | 0.51 | 0.11 |
| SW:ALFA_HUMAN | ALDOA   | 5 | 4  | 0.71 | 0.25 |
| SW:GFA1_HUMAN | GFPT1   | 5 | 5  | 0.72 | 0.06 |
| SW:UGS1_HUMAN | GYS1    | 5 | 5  | 0.73 | 0.15 |
| SW:G3P2_HUMAN | GAPD    | 5 | 2  | 0.85 | 0.01 |
| SW:G6PI_HUMAN | GPI     | 5 | 2  | 0.85 | 0.01 |
| SW:ENOB_HUMAN | ENO3    | 5 | 4  | 0.86 | 0.13 |
| GP:AF144074_1 | G2AN    | 5 | 3  | 0.86 | 0.05 |
| SW:GDE_HUMAN  | AGL     | 5 | 18 | 0.92 | 0.22 |
| SW:PGK1_HUMAN | PGK1    | 5 | 16 | 0.93 | 0.18 |
| SW:DHAG_HUMAN | ALDH9A1 | 5 | 1  | 0.94 | 0.00 |
| SW:ODO1_HUMAN | OGDH    | 5 | 9  | 0.94 | 0.18 |

|               |          |   |    |      |      |
|---------------|----------|---|----|------|------|
| SW:K6PL_HUMAN | PFKL     | 5 | 8  | 0.97 | 0.17 |
| SW:DIAC_HUMAN | CTBS     | 5 | 1  | 1.00 | 0.00 |
| SW:KPB1_HUMAN | PHKA1    | 5 | 3  | 1.00 | 0.09 |
| SW:TPIS_HUMAN | TPI1     | 5 | 9  | 1.00 | 0.18 |
| SW:ENOA_HUMAN | ENO1     | 5 | 3  | 1.01 | 0.08 |
| SW:G19P_HUMAN | PRKCSH   | 5 | 3  | 1.01 | 0.47 |
| GP:AJ131612_1 | Slc25a10 | 5 | 1  | 1.02 | 0.00 |
| SW:ODPB_HUMAN | PDHB     | 5 | 1  | 1.05 | 0.00 |
| SW:HXX1_HUMAN | HK1      | 5 | 5  | 1.07 | 0.11 |
| GP:AF113123_1 | DCXR     | 5 | 2  | 1.09 | 0.01 |
| SW:KPY1_HUMAN | PKM2     | 5 | 19 | 1.09 | 0.24 |
| SW:GNT2_HUMAN | MGAT2    | 5 | 1  | 1.16 | 0.00 |
| SW:ODPA_HUMAN | PDHA1    | 5 | 3  | 1.17 | 0.41 |
| SW:GAL1_HUMAN | GALK1    | 5 | 1  | 1.19 | 0.00 |
| SW:GLCM_HUMAN | GBA      | 5 | 2  | 1.21 | 0.09 |
| SW:INSR_HUMAN | INSR     | 5 | 2  | 1.22 | 0.02 |



|               |        |   |    |      |      |
|---------------|--------|---|----|------|------|
| SW:ODPX_HUMAN | PDX1   | 5 | 3  | 1.24 | 0.16 |
| GP:AB028128_1 | DPM3   | 5 | 2  | 1.25 | 0.51 |
| SW:ACON_HUMAN | ACO2   | 5 | 1  | 1.27 | 0.00 |
| SW:GL6S_HUMAN | GNS    | 5 | 5  | 1.36 | 0.20 |
| SW:KG3B_HUMAN | GSK3B  | 5 | 1  | 1.36 | 0.00 |
| SW:DLDH_HUMAN | DLD    | 5 | 10 | 1.59 | 0.59 |
| SW:CISY_HUMAN | CS     | 5 | 1  | 1.62 | 0.00 |
| SW:BDH_HUMAN  | BDH    | 5 | 4  | 1.76 | 0.25 |
| SW:AGAL_HUMAN | GLA    | 5 | 1  | 1.80 | 0.00 |
| SW:LYAG_HUMAN | GAA    | 5 | 2  | 1.94 | 0.01 |
| SW:MAOM_HUMAN | ME2    | 5 | 2  | 1.96 | 0.04 |
| SW:SPHM_HUMAN | SGSH   | 5 | 1  | 2.03 | 0.00 |
| SW:IDHP_HUMAN | IDH2   | 5 | 7  | 2.04 | 0.65 |
| SW:KC2B_HUMAN | CSNK2B | 5 | 2  | 2.11 | 0.18 |
| SW:MA2B_HUMAN | MAN2B1 | 5 | 1  | 2.14 | 0.00 |
| SW:DHSB_HUMAN | SDHB   | 5 | 1  | 2.24 | 0.00 |

|                      |        |   |    |      |      |
|----------------------|--------|---|----|------|------|
| SW:PPCM_HUMAN        | PCK2   | 5 | 6  | 2.45 | 1.09 |
| SW:DHSA_HUMAN        | SDHA   | 5 | 5  | 2.48 | 0.32 |
| SW:K6PP_HUMAN        | PFKP   | 5 | 1  | 2.96 | 0.00 |
| SW:GPDM_HUMAN        | GPD2   | 5 | 1  | 3.30 | 0.00 |
| GP:AJ002744_1        | GALNT7 | 5 | 1  | 4.00 | 0.00 |
| <b>Cell Adhesion</b> |        |   |    |      |      |
| SW:VINC_HUMAN        | VCL    | 6 | 2  | 0.53 | 0.02 |
| SW:MOES_HUMAN        | MSN    | 6 | 1  | 0.59 | 0.00 |
| SW:CTN1_HUMAN        | CTNNA1 | 6 | 27 | 0.71 | 0.19 |
| SW:PLAK_HUMAN        | DP3    | 6 | 12 | 0.73 | 0.19 |
| SW:CLD7_HUMAN        | CLDN7  | 6 | 1  | 0.74 | 0.00 |
| SW:ITAV_HUMAN        | ITGAV  | 6 | 1  | 0.75 | 0.00 |
| GP:AF306723_1        | JUP    | 6 | 1  | 0.78 | 0.00 |
| SW:CTNB_HUMAN        | CTNNB1 | 6 | 19 | 0.79 | 0.26 |
| SW:EZRI_HUMAN        | VIL2   | 6 | 1  | 0.80 | 0.00 |
| SW:ITA6_HUMAN        | ITGA6  | 6 | 3  | 0.83 | 0.04 |
| GP:AB002382_1        | CTNND1 | 6 | 18 | 0.88 | 0.31 |
| SW:ITA5_HUMAN        | ITGA5  | 6 | 2  | 0.91 | 0.03 |

|                |         |   |    |      |      |
|----------------|---------|---|----|------|------|
| SW:EFA5_HUMAN  | EFNA5   | 6 | 1  | 0.99 | 0.00 |
| PIR2:G02390    | MDC15   | 6 | 6  | 1.03 | 0.12 |
| SW:DESP_HUMAN  | DSP     | 6 | 7  | 1.15 | 0.13 |
| SW:LMB2_HUMAN  | LAMB2   | 6 | 2  | 1.22 | 0.15 |
| SW:CD81_HUMAN  | CD81    | 6 | 2  | 1.27 | 0.06 |
| SW:ATC2_HUMAN  | ATP2B2  | 6 | 9  | 1.28 | 0.35 |
| SWN:ARVC_HUMAN | ARVCF   | 6 | 4  | 1.40 | 0.33 |
| SW:RSP4_HUMAN  | LAMR1   | 6 | 7  | 1.44 | 0.05 |
| SW:RB13_HUMAN  | RAB13   | 6 | 1  | 1.49 | 0.00 |
| SW:PTPF_HUMAN  | LAR     | 6 | 5  | 1.50 | 0.35 |
| SW:MIC2_HUMAN  | MIC2    | 6 | 11 | 1.55 | 0.30 |
| SW:C166_HUMAN  | ALCAM   | 6 | 8  | 1.58 | 0.27 |
| GP:U17032_1    | ARHGAP5 | 6 | 1  | 1.66 | 0.00 |
| SWN:JAM1_HUMAN | JAM1    | 6 | 9  | 1.85 | 0.84 |
| SW:ITB1_HUMAN  | ITGB1   | 6 | 5  | 1.94 | 0.58 |
| GP:U64791_1    | GLG1    | 6 | 1  | 1.95 | 0.00 |
| GP:U28811_1    | CFR-1   | 6 | 14 | 1.97 | 0.53 |

|                           |        |   |   |      |      |
|---------------------------|--------|---|---|------|------|
| SW:NB8M_HUMAN             | NDUFB7 | 6 | 2 | 2.27 | 0.65 |
| GP:AC005609_7             | PCDHA4 | 6 | 1 | 2.70 | 0.00 |
| SW:LU_HUMAN               | LU     | 6 | 3 | 2.88 | 0.14 |
| SW:LMG1_HUMAN             | LAMC1  | 6 | 1 | 3.60 | 0.00 |
| <b>Cell Cycle Control</b> |        |   |   |      |      |
| SW:UBCC_HUMAN             | UBE2N  | 7 | 1 | 0.53 | 0.00 |
| SW:RAPB_HUMAN             | RAP1B  | 7 | 2 | 0.59 | 0.04 |
| SW:EGFR_HUMAN             | EGFR   | 7 | 2 | 0.62 | 0.00 |
| SW:RS4_HUMAN              | RPS4X  | 7 | 3 | 0.73 | 0.14 |
| SW:FKB1_HUMAN             | FKBP1A | 7 | 2 | 0.78 | 0.00 |
| SW:P2AA_HUMAN             | PPP2CA | 7 | 7 | 0.78 | 0.11 |
| SW:DYN2_HUMAN             | DNM2   | 7 | 1 | 0.81 | 0.00 |
| GP:AB002323_1             | DNCH1  | 7 | 8 | 0.83 | 0.29 |
| PIR2:T03842               | SKB1   | 7 | 5 | 0.83 | 0.18 |
| GP:U59435_1               | PA2G4  | 7 | 7 | 0.84 | 0.18 |
| SW:GPS1_HUMAN             | GPS1   | 7 | 4 | 0.86 | 0.12 |
| SW:RHOG_HUMAN             | ARHG   | 7 | 5 | 0.90 | 0.29 |
| SW:TCPB_HUMAN             | CCT2   | 7 | 5 | 0.90 | 0.26 |

|                |        |   |    |      |      |
|----------------|--------|---|----|------|------|
| SW:G25B_HUMAN  | CDC42  | 7 | 13 | 0.90 | 0.13 |
| GP:AB006534_1  | SPINT2 | 7 | 1  | 0.91 | 0.00 |
| SW:143T_HUMAN  | YWHAQ  | 7 | 3  | 0.91 | 0.05 |
| PIR2:S69890    | MIG2   | 7 | 2  | 0.93 | 0.03 |
| SW:APP2_HUMAN  | APLP2  | 7 | 2  | 0.95 | 0.08 |
| SW:RHOA_HUMAN  | ARHA   | 7 | 37 | 0.95 | 0.25 |
| SW:TCPH_HUMAN  | CCT7   | 7 | 2  | 0.95 | 0.10 |
| SW:DYNA_HUMAN  | DCTN1  | 7 | 1  | 0.98 | 0.00 |
| SW:RAN_HUMAN   | RAN    | 7 | 3  | 0.98 | 0.04 |
| SW:RAPA_HUMAN  | RAP1A  | 7 | 1  | 0.98 | 0.00 |
| SW:TERA_HUMAN  | VCP    | 7 | 41 | 0.99 | 0.20 |
| SW:TCPD_HUMAN  | CCT4   | 7 | 4  | 1.01 | 0.17 |
| GP:D88435_1    | GAK    | 7 | 2  | 1.05 | 0.04 |
| SW:ERBB2_HUMAN | ERBB2  | 7 | 5  | 1.07 | 0.09 |
| SW:PP1A_HUMAN  | PPP1CA | 7 | 2  | 1.09 | 0.03 |
| SW:FRAP_HUMAN  | FRAP1  | 7 | 1  | 1.13 | 0.00 |
| GP:U97276_1    | Q6     | 7 | 1  | 1.17 | 0.00 |

|                        |          |   |   |      |      |
|------------------------|----------|---|---|------|------|
| PIR2:T00387            | CLASP1   | 7 | 1 | 1.18 | 0.00 |
| GP:AB020723_1          | KIAA0916 | 7 | 1 | 1.23 | 0.00 |
| SW:NPL1_HUMAN          | NAP1L1   | 7 | 1 | 1.24 | 0.00 |
| SW:RCC_HUMAN           | CHC1     | 7 | 2 | 1.30 | 0.00 |
| SW:P2BA_HUMAN          | PPP3CA   | 7 | 3 | 1.30 | 0.16 |
| GP:AF013591_1          | SUDD     | 7 | 2 | 1.53 | 0.02 |
| SW:RFA3_HUMAN          | RPA3     | 7 | 2 | 1.61 | 0.19 |
| SW:CUL2_HUMAN          | CUL2     | 7 | 1 | 1.64 | 0.00 |
| SW:MCM4_HUMAN          | MCM4     | 7 | 3 | 1.65 | 0.14 |
| SW:BUB3_HUMAN          | BUB3     | 7 | 2 | 1.73 | 0.02 |
| SW:ITB1_HUMAN          | ITGB1    | 7 | 5 | 1.94 | 0.58 |
| SW:NHPX_HUMAN          | NHP2L1   | 7 | 2 | 2.21 | 0.20 |
| <b>Cell Elongation</b> |          |   |   |      |      |
| SW:ARP3_HUMAN          | ACTR3    | 8 | 6 | 0.58 | 0.13 |
| SW:AR41_HUMAN          | ARPC1B   | 8 | 4 | 0.65 | 0.18 |
| SW:AR21_HUMAN          | ARPC3    | 8 | 1 | 0.74 | 0.00 |
| SW:ARP2_HUMAN          | ACTR2    | 8 | 5 | 0.99 | 0.15 |

|                      |        |    |   |      |      |
|----------------------|--------|----|---|------|------|
| SW:AR34_HUMAN        | ARPC2  | 8  | 2 | 1.29 | 0.38 |
| <b>Cell Polarity</b> |        |    |   |      |      |
| SW:CAP1_HUMAN        | CAP    | 9  | 1 | 0.60 | 0.00 |
| GP:U40572_1          | SNTB2  | 9  | 3 | 1.11 | 0.12 |
| SW:VAB2_HUMAN        | ATP6B2 | 9  | 7 | 1.47 | 0.34 |
| <b>Cell Stress</b>   |        |    |   |      |      |
| SW:NDR1_HUMAN        | NDRG1  | 10 | 4 | 0.26 | 0.05 |
| SW:TRAL_HUMAN        | HSP75  | 10 | 1 | 0.28 | 0.00 |
| PIR2:JC4775          | DNAJC3 | 10 | 2 | 0.51 | 0.27 |
| SW:MRP1_HUMAN        | ABCC1  | 10 | 4 | 0.58 | 0.08 |
| SW:HS74_HUMAN        | HSPA4  | 10 | 3 | 0.59 | 0.16 |
| SW:AOP2_HUMAN        | AOP2   | 10 | 3 | 0.61 | 0.03 |
| SW:MRP4_HUMAN        | MRP4   | 10 | 2 | 0.61 | 0.03 |
| SW:HS71_HUMAN        | HSPA1A | 10 | 6 | 0.62 | 0.14 |
| SW:TDX2_HUMAN        | PRDX2  | 10 | 8 | 0.77 | 0.16 |
| SW:ENPL_HUMAN        | TRA1   | 10 | 5 | 0.84 | 0.11 |
| SW:DNJ2_HUMAN        | DNAJA1 | 10 | 1 | 0.86 | 0.00 |

|                       |          |    |    |      |      |
|-----------------------|----------|----|----|------|------|
| GP:AB015798_1         | HSJ2     | 10 | 1  | 0.91 | 0.00 |
| SW:MK01_HUMAN         | MAPK1    | 10 | 1  | 0.97 | 0.00 |
| SW:TDX1_HUMAN         | PRDX1    | 10 | 2  | 1.02 | 0.01 |
| SW:RAC1_HUMAN         | RAC1     | 10 | 18 | 1.08 | 0.53 |
| SW:A4_HUMAN           | APP      | 10 | 5  | 1.09 | 0.19 |
| PIR2:T00361           | KIAA0678 | 10 | 3  | 1.18 | 0.16 |
| SW:MYSO_HUMAN         | MYH10    | 10 | 4  | 1.18 | 0.49 |
| SW:HS9B_HUMAN         | HSPCB    | 10 | 10 | 1.22 | 0.52 |
| SW:BCR_HUMAN          | BCR      | 10 | 1  | 1.29 | 0.00 |
| SW:SODC_HUMAN         | SOD1     | 10 | 5  | 1.29 | 0.18 |
| GP:D87116_1           | MAP2K3   | 10 | 3  | 1.38 | 0.17 |
| SW:PPOL_HUMAN         | ADPRT    | 10 | 2  | 1.43 | 0.42 |
| SW:AOPP_HUMAN         | PRDX5    | 10 | 4  | 1.43 | 0.25 |
| SW:GST1_HUMAN         | MGST1    | 10 | 13 | 1.45 | 0.34 |
| SW:H105_HUMAN         | HSP105B  | 10 | 1  | 1.53 | 0.00 |
| GP:AB032903_1         | LOC51292 | 10 | 1  | 1.81 | 0.00 |
| SW:TDXM_HUMAN         | PRDX3    | 10 | 4  | 1.96 | 0.16 |
| SW:CATA_HUMAN         | CAT      | 10 | 3  | 2.24 | 0.12 |
| <b>Cell Structure</b> |          |    |    |      |      |



|               |        |    |    |      |      |
|---------------|--------|----|----|------|------|
| PIR2:I38346   | TTN    | 11 | 1  | 0.18 | 0.00 |
| SW:41_HUMAN   | EPB41  | 11 | 2  | 0.27 | 0.00 |
| GP:U83668_1   | TUBB4Q | 11 | 1  | 0.47 | 0.00 |
| GPN:U48734_1  | ACTN4  | 11 | 8  | 0.50 | 0.03 |
| PIR2:A59253   | MYO1C  | 11 | 4  | 0.53 | 0.05 |
| SW:VINC_HUMAN | VCL    | 11 | 2  | 0.53 | 0.02 |
| GP:AK022489_1 | MYO1B  | 11 | 1  | 0.54 | 0.00 |
| SW:COF1_HUMAN | CFL1   | 11 | 14 | 0.55 | 0.21 |
| SW:DEST_HUMAN | DSTN   | 11 | 14 | 0.56 | 0.22 |
| SW:MYSA_HUMAN | MYH6   | 11 | 1  | 0.56 | 0.00 |
| SW:ARP3_HUMAN | ACTR3  | 11 | 6  | 0.58 | 0.13 |
| PIR2:T13151   | CD2AP  | 11 | 3  | 0.58 | 0.01 |
| PIR2:A53016   | MYO5A  | 11 | 1  | 0.58 | 0.00 |
| SW:MOES_HUMAN | MSN    | 11 | 1  | 0.59 | 0.00 |
| SW:EGFR_HUMAN | EGFR   | 11 | 2  | 0.62 | 0.00 |
| SW:AR41_HUMAN | ARPC1B | 11 | 4  | 0.65 | 0.18 |
| SW:DIA1_HUMAN | DIAPH1 | 11 | 2  | 0.65 | 0.08 |
| SW:RHOB_HUMAN | ARHB   | 11 | 6  | 0.70 | 0.04 |
| SW:CTN1_HUMAN | CTNNA1 | 11 | 27 | 0.71 | 0.19 |
| SW:MYSN_HUMAN | MYH9   | 11 | 26 | 0.71 | 0.26 |
| GP:AF177171_1 | TMOD3  | 11 | 2  | 0.72 | 0.00 |

|                |         |    |    |      |      |
|----------------|---------|----|----|------|------|
| SW:PLAK_HUMAN  | DP3     | 11 | 12 | 0.73 | 0.19 |
| SW:AR21_HUMAN  | ARPC3   | 11 | 1  | 0.74 | 0.00 |
| GP:AB008515_1  | RanBPM  | 11 | 1  | 0.74 | 0.00 |
| SW:CAPB_HUMAN  | CAPZB   | 11 | 8  | 0.76 | 0.13 |
| SWN:LAD1_HUMAN | LAD1    | 11 | 1  | 0.76 | 0.00 |
| SW:MLEN_HUMAN  | MYL6    | 11 | 11 | 0.76 | 0.10 |
| SW:DAG1_HUMAN  | DAG1    | 11 | 1  | 0.77 | 0.00 |
| SW:IQGA_HUMAN  | IQGAP1  | 11 | 4  | 0.77 | 0.09 |
| GP:AF306723_1  | JUP     | 11 | 1  | 0.78 | 0.00 |
| SW:CTNB_HUMAN  | CTNNB1  | 11 | 19 | 0.79 | 0.26 |
| GP:AB008567_1  | SPTBN2  | 11 | 4  | 0.79 | 0.03 |
| SW:EZRI_HUMAN  | VIL2    | 11 | 1  | 0.80 | 0.00 |
| SW:ABP2_HUMAN  | FLNA    | 11 | 11 | 0.85 | 0.11 |
| GP:AB002382_1  | CTNND1  | 11 | 18 | 0.88 | 0.31 |
| GP:AF128536_1  | PACSIN2 | 11 | 4  | 0.89 | 0.45 |
| SW:TBB2_HUMAN  | TUBB2   | 11 | 30 | 0.91 | 0.31 |
| GP:AF151793_1  | AIP1    | 11 | 8  | 0.92 | 0.09 |

|               |        |    |    |      |      |
|---------------|--------|----|----|------|------|
| SW:UTRO_HUMAN | UTRN   | 11 | 7  | 0.92 | 0.24 |
| SW:ACTB_HUMAN | ACTB   | 11 | 32 | 0.94 | 0.59 |
| SW:RHOA_HUMAN | ARHA   | 11 | 37 | 0.95 | 0.25 |
| PIR2:T46270   | FLNB   | 11 | 12 | 0.95 | 0.39 |
| SW:PRO1_HUMAN | PFN1   | 11 | 4  | 0.97 | 0.39 |
| SW:CAZ2_HUMAN | CAPZA2 | 11 | 1  | 0.98 | 0.00 |
| SW:DREB_HUMAN | DBN1   | 11 | 1  | 0.98 | 0.00 |
| SW:ARP2_HUMAN | ACTR2  | 11 | 5  | 0.99 | 0.15 |
| SW:SPCN_HUMAN | SPTAN1 | 11 | 2  | 1.02 | 0.35 |
| GP:AB002387_1 | MYO6   | 11 | 34 | 1.04 | 0.35 |
| SW:ARF6_HUMAN | ARF6   | 11 | 2  | 1.07 | 0.05 |
| SW:RAC1_HUMAN | RAC1   | 11 | 18 | 1.08 | 0.53 |
| SW:TBA1_HUMAN | TUBA1  | 11 | 36 | 1.11 | 0.28 |
| PIR2:G02520   | PLEC1  | 11 | 7  | 1.12 | 0.19 |
| SW:DESP_HUMAN | DSP    | 11 | 7  | 1.15 | 0.13 |
| SW:PEBP_HUMAN | PBP    | 11 | 2  | 1.17 | 0.15 |
| SW:RS29_HUMAN | RPS29  | 11 | 1  | 1.17 | 0.00 |
| SW:DYL1_HUMAN | PIN    | 11 | 10 | 1.24 | 0.34 |
| GP:AF022728_1 | DTNB   | 11 | 1  | 1.27 | 0.00 |

|                                       |        |    |    |      |      |
|---------------------------------------|--------|----|----|------|------|
| SW:AR34_HUMAN                         | ARPC2  | 11 | 2  | 1.29 | 0.38 |
| GP:AJ001714_1                         | MYO9A  | 11 | 1  | 1.34 | 0.00 |
| GP:AB032179_1                         | EHM2   | 11 | 1  | 1.35 | 0.00 |
| SW:AAC1_HUMAN                         | ACTN1  | 11 | 12 | 1.44 | 1.22 |
| SW:MAPB_HUMAN                         | MAP1B  | 11 | 4  | 1.47 | 0.30 |
| SW:TPMN_HUMAN                         | TPM4   | 11 | 6  | 1.47 | 0.30 |
| SW:MAP4_HUMAN                         | MAP4   | 11 | 1  | 1.54 | 0.00 |
| PIR2:A55575                           | ANK3   | 11 | 9  | 1.85 | 0.18 |
| SW:ANK1_HUMAN                         | ANK1   | 11 | 4  | 1.94 | 0.82 |
| GP:AB018266_1                         | MATR3  | 11 | 4  | 2.37 | 0.25 |
| SW:ADDA_HUMAN                         | ADD1   | 11 | 1  | 2.64 | 0.00 |
| SW:PNL1_HUMAN                         | PNUTL1 | 11 | 2  | 2.64 | 0.07 |
| SW:LAMA_HUMAN                         | LMNA   | 11 | 1  | 2.95 | 0.00 |
| SW:LAM1_HUMAN                         | LMNB1  | 11 | 1  | 3.22 | 0.00 |
| <b>Chromatin/Chromosome Structure</b> |        |    |    |      |      |
| SW:NPL1_HUMAN                         | NAP1L1 | 12 | 1  | 1.24 | 0.00 |
| SW:RCC_HUMAN                          | CHC1   | 12 | 2  | 1.30 | 0.00 |
| SW:HMG1_HUMAN                         | HMG1   | 12 | 3  | 1.33 | 0.21 |
| SW:PPOL_HUMAN                         | ADPRT  | 12 | 2  | 1.43 | 0.42 |

|                    |        |    |    |      |      |
|--------------------|--------|----|----|------|------|
| SW:KU86_HUMAN      | XRCC5  | 12 | 6  | 1.46 | 0.36 |
| GP:AF041483_1      | H2AFY  | 12 | 1  | 1.80 | 0.00 |
| SW:RB48_HUMAN      | RBBP4  | 12 | 1  | 1.80 | 0.00 |
| SW:TOP1_HUMAN      | TOP1   | 12 | 1  | 2.45 | 0.00 |
| SW:H33_HUMAN       | H3F3A  | 12 | 1  | 3.08 | 0.00 |
| <b>Cytokinesis</b> |        |    |    |      |      |
| SW:PNL1_HUMAN      | PNUTL1 | 13 | 2  | 2.64 | 0.07 |
| <b>DNA Repair</b>  |        |    |    |      |      |
| SW:G3P2_HUMAN      | GAPD   | 14 | 2  | 0.85 | 0.01 |
| PIR1:I38908        | DDB1   | 14 | 2  | 0.86 | 0.03 |
| SW:FRAP_HUMAN      | FRAP1  | 14 | 1  | 1.13 | 0.00 |
| SW:PPOL_HUMAN      | ADPRT  | 14 | 2  | 1.43 | 0.42 |
| SW:KU86_HUMAN      | XRCC5  | 14 | 6  | 1.46 | 0.36 |
| SW:APE1_HUMAN      | APEX   | 14 | 13 | 1.57 | 0.38 |
| SW:RFA3_HUMAN      | RPA3   | 14 | 2  | 1.61 | 0.19 |
| PIR2:A57099        | PRKDC  | 14 | 13 | 1.74 | 0.27 |
| SW:MSH3_HUMAN      | MSH3   | 14 | 1  | 2.18 | 0.00 |

|                        |         |    |    |      |      |
|------------------------|---------|----|----|------|------|
| SW:RFA1_HUMAN          | RPA1    | 14 | 1  | 2.30 | 0.00 |
| <b>DNA Synthesis</b>   |         |    |    |      |      |
| SW:RAN_HUMAN           | RAN     | 15 | 3  | 0.98 | 0.04 |
| SW:MCM3_HUMAN          | MCM3    | 15 | 1  | 1.16 | 0.00 |
| SW:NPL1_HUMAN          | NAP1L1  | 15 | 1  | 1.24 | 0.00 |
| SW:RFA3_HUMAN          | RPA3    | 15 | 2  | 1.61 | 0.19 |
| SW:MCM4_HUMAN          | MCM4    | 15 | 3  | 1.65 | 0.14 |
| SW:RFA1_HUMAN          | RPA1    | 15 | 1  | 2.30 | 0.00 |
| SW:PUR_HUMAN           | PURA    | 15 | 2  | 2.62 | 0.17 |
| <b>Differentiation</b> |         |    |    |      |      |
| GP:U35146_1            | KKIAMRE | 16 | 2  | 0.26 | 0.06 |
| GPN:Y14436_1           | PPAP2A  | 16 | 2  | 0.27 | 0.02 |
| SW:HPS1_HUMAN          | ABHD2   | 16 | 1  | 0.36 | 0.00 |
| GP:AB015019_1          | BAIAP2  | 16 | 1  | 0.45 | 0.00 |
| PIR2:A53016            | MYO5A   | 16 | 1  | 0.58 | 0.00 |
| GP:AF003521_1          | JAG2    | 16 | 1  | 0.65 | 0.00 |
| SW:CLH2_HUMAN          | CLTCL1  | 16 | 10 | 0.66 | 0.15 |
| SW:HD_HUMAN            | HD      | 16 | 1  | 0.67 | 0.00 |
| GP:AB012191_1          | NEDD8   | 16 | 2  | 0.69 | 0.04 |

|               |         |    |    |      |      |
|---------------|---------|----|----|------|------|
| SW:RB3D_HUMAN | RAB3D   | 16 | 1  | 0.74 | 0.00 |
| SW:ITAV_HUMAN | ITGAV   | 16 | 1  | 0.75 | 0.00 |
| SW:DAG1_HUMAN | DAG1    | 16 | 1  | 0.77 | 0.00 |
| GP:AB011159_1 | NCKAP1  | 16 | 7  | 0.78 | 0.08 |
| SW:ITMA_HUMAN | ITM2A   | 16 | 1  | 0.83 | 0.00 |
| SW:UTRO_HUMAN | UTRN    | 16 | 7  | 0.92 | 0.24 |
| SW:APP2_HUMAN | APLP2   | 16 | 2  | 0.95 | 0.08 |
| SW:ASAH_HUMAN | ASAH    | 16 | 1  | 0.99 | 0.00 |
| SW:TPIS_HUMAN | TPI1    | 16 | 9  | 1.00 | 0.18 |
| SW:TDX1_HUMAN | PRDX1   | 16 | 2  | 1.02 | 0.01 |
| GP:AB037819_1 | RRBP1   | 16 | 7  | 1.02 | 0.13 |
| SW:KAP2_HUMAN | PRKAR2A | 16 | 2  | 1.04 | 0.57 |
| SW:ERB2_HUMAN | ERBB2   | 16 | 5  | 1.07 | 0.09 |
| SW:RAC1_HUMAN | RAC1    | 16 | 18 | 1.08 | 0.53 |
| SW:DESP_HUMAN | DSP     | 16 | 7  | 1.15 | 0.13 |
| GP:AF308601_1 | NOTCH2  | 16 | 2  | 1.16 | 0.06 |
| PIR2:JE0334   | RUVBL1  | 16 | 3  | 1.16 | 0.14 |
| SW:PEBP_HUMAN | PBP     | 16 | 2  | 1.17 | 0.15 |

|               |         |    |    |      |      |
|---------------|---------|----|----|------|------|
| SW:GBI2_HUMAN | GNAI2   | 16 | 1  | 1.18 | 0.00 |
| SW:A2HS_HUMAN | AHSG    | 16 | 4  | 1.21 | 0.13 |
| GP:AF084523_1 | CREG    | 16 | 1  | 1.22 | 0.00 |
| SW:DYL1_HUMAN | PIN     | 16 | 10 | 1.24 | 0.34 |
| SW:KAPA_HUMAN | PRKACA  | 16 | 2  | 1.28 | 0.55 |
| SW:ATC2_HUMAN | ATP2B2  | 16 | 9  | 1.28 | 0.35 |
| SW:DDXY_HUMAN | DBY     | 16 | 2  | 1.32 | 0.05 |
| SW:SERA_HUMAN | PHGDH   | 16 | 44 | 1.36 | 0.41 |
| SW:R10A_HUMAN | RPL10A  | 16 | 1  | 1.38 | 0.00 |
| SW:OCRL_HUMAN | OCRL    | 16 | 2  | 1.42 | 1.00 |
| SW:VAB2_HUMAN | ATP6B2  | 16 | 7  | 1.47 | 0.34 |
| SW:DHA4_HUMAN | ALDH3A2 | 16 | 2  | 1.62 | 0.67 |
| SW:DDX1_HUMAN | DDX1    | 16 | 6  | 1.67 | 0.10 |
| PIR2:T09073   | SFRS2IP | 16 | 1  | 1.89 | 0.00 |
| SW:MRP_HUMAN  | CSRP3   | 16 | 21 | 2.13 | 0.55 |
| SW:NRP_HUMAN  | NRP1    | 16 | 8  | 2.20 | 1.33 |



|                            |        |    |    |      |      |
|----------------------------|--------|----|----|------|------|
| SW:DDX5_HUMAN              | DDX5   | 16 | 1  | 2.27 | 0.00 |
| SW:GRBA_HUMAN              | GRB10  | 16 | 3  | 2.55 | 2.22 |
| SW:ATCK_HUMAN              | ATP2C1 | 16 | 2  | 2.59 | 0.30 |
| SW:FXR1_HUMAN              | FXR1   | 16 | 1  | 2.74 | 0.00 |
| SW:SORC_HUMAN              | SRI    | 16 | 2  | 2.86 | 2.11 |
| SW:LAMA_HUMAN              | LMNA   | 16 | 1  | 2.95 | 0.00 |
| GP:AF002668_1              | DEGS   | 16 | 1  | 3.29 | 0.00 |
| SW:LMG1_HUMAN              | LAMC1  | 16 | 1  | 3.60 | 0.00 |
| <b>Dosage Compensation</b> |        |    |    |      |      |
| SW:UTX_HUMAN               | UTX    | 17 | 1  | 1.39 | 0.00 |
| <b>Energy Generation</b>   |        |    |    |      |      |
| SW:ACDV_HUMAN              | ACADVL | 18 | 1  | 0.32 | 0.00 |
| SW:PHS2_HUMAN              | PYGM   | 18 | 1  | 0.36 | 0.00 |
| SW:PHS3_HUMAN              | PYGB   | 18 | 10 | 0.48 | 0.06 |
| SW:GLYG_HUMAN              | GYG    | 18 | 6  | 0.51 | 0.11 |
| SW:NC5R_HUMAN              | DIA1   | 18 | 2  | 0.60 | 0.02 |
| SW:GFA1_HUMAN              | GFPT1  | 18 | 5  | 0.72 | 0.06 |
| SW:UGS1_HUMAN              | GYS1   | 18 | 5  | 0.73 | 0.15 |

|                |          |    |    |      |      |
|----------------|----------|----|----|------|------|
| SW:WFS1_HUMAN  | WFS1     | 18 | 1  | 0.75 | 0.00 |
| SW:G3P2_HUMAN  | GAPD     | 18 | 2  | 0.85 | 0.01 |
| SW:ENOB_HUMAN  | ENO3     | 18 | 4  | 0.86 | 0.13 |
| SW:KCRB_HUMAN  | CKB      | 18 | 3  | 0.88 | 0.26 |
| SW:GDE_HUMAN   | AGL      | 18 | 18 | 0.92 | 0.22 |
| SW:PGK1_HUMAN  | PGK1     | 18 | 16 | 0.93 | 0.18 |
| SW:ODO1_HUMAN  | OGDH     | 18 | 9  | 0.94 | 0.18 |
| SW:K6PL_HUMAN  | PFKL     | 18 | 8  | 0.97 | 0.17 |
| SW:KPB1_HUMAN  | PHKA1    | 18 | 3  | 1.00 | 0.09 |
| SW:TPIS_HUMAN  | TPI1     | 18 | 9  | 1.00 | 0.18 |
| SW:ENOA_HUMAN  | ENO1     | 18 | 3  | 1.01 | 0.08 |
| GP:AJ131612_1  | Slc25a10 | 18 | 1  | 1.02 | 0.00 |
| SW:ODPB_HUMAN  | PDHB     | 18 | 1  | 1.05 | 0.00 |
| SW:HEMZ_HUMAN  | FECH     | 18 | 8  | 1.06 | 0.19 |
| SW:H XK1_HUMAN | HK1      | 18 | 5  | 1.07 | 0.11 |
| SW:CPT2_HUMAN  | CPT2     | 18 | 1  | 1.08 | 0.00 |

|               |               |    |    |      |      |
|---------------|---------------|----|----|------|------|
| SW:KPY1_HUMAN | PKM2          | 18 | 19 | 1.09 | 0.24 |
| SW:FLRE_HUMAN | BLVRB         | 18 | 3  | 1.12 | 0.12 |
| SW:COXS_HUMAN | COX17         | 18 | 1  | 1.18 | 0.00 |
| SW:INSR_HUMAN | INSR          | 18 | 2  | 1.22 | 0.02 |
| SW:THIK_HUMAN | ACAA1         | 18 | 15 | 1.26 | 0.25 |
| SW:MDHC_HUMAN | MDH1          | 18 | 4  | 1.27 | 0.10 |
| SW:ACON_HUMAN | ACO2          | 18 | 1  | 1.27 | 0.00 |
| SW:CPT1_HUMAN | CPT1A         | 18 | 1  | 1.30 | 0.00 |
| SW:D3D2_HUMAN | DCI           | 18 | 3  | 1.31 | 0.20 |
| PIR2:JC5938   | Txnl          | 18 | 2  | 1.31 | 0.01 |
| SW:ECH1_HUMAN | ECH1          | 18 | 28 | 1.36 | 0.24 |
| SW:KG3B_HUMAN | GSK3B         | 18 | 1  | 1.36 | 0.00 |
| SW:KCRU_HUMAN | CKMT1         | 18 | 6  | 1.45 | 0.16 |
| SW:ACPM_HUMAN | NDUFAB1       | 18 | 3  | 1.46 | 0.23 |
| SW:OBRG_HUMAN | LEPR          | 18 | 1  | 1.46 | 0.00 |
| SW:CAOP_HUMAN | ACOX1 or ACOX | 18 | 1  | 1.53 | 0.00 |
| SW:APE1_HUMAN | APEX          | 18 | 13 | 1.57 | 0.38 |

|               |         |    |    |      |      |
|---------------|---------|----|----|------|------|
| SW:DLDH_HUMAN | DLD     | 18 | 10 | 1.59 | 0.59 |
| SW:CISY_HUMAN | CS      | 18 | 1  | 1.62 | 0.00 |
| SW:ADRO_HUMAN | FDXR    | 18 | 1  | 1.82 | 0.00 |
| SW:ADT1_HUMAN | SLC25A4 | 18 | 2  | 1.84 | 0.94 |
| SW:NUAM_HUMAN | NDUFS1  | 18 | 1  | 1.87 | 0.00 |
| SW:ECHB_HUMAN | HADHB   | 18 | 4  | 1.87 | 0.07 |
| SW:LYAG_HUMAN | GAA     | 18 | 2  | 1.94 | 0.01 |
| SW:COX1_HUMAN | MTCO1   | 18 | 1  | 1.97 | 0.00 |
| SW:ECHA_HUMAN | HADHA   | 18 | 13 | 1.97 | 0.65 |
| SW:ETFB_HUMAN | ETFB    | 18 | 2  | 1.99 | 0.48 |
| PIR2:B53737   | SLC25A3 | 18 | 21 | 2.02 | 0.42 |
| SW:IDHP_HUMAN | IDH2    | 18 | 7  | 2.04 | 0.65 |
| SW:CY1_HUMAN  | CYC1    | 18 | 2  | 2.10 | 0.00 |
| SW:NUPM_HUMAN | NDUFA8  | 18 | 5  | 2.10 | 0.44 |
| SW:KC2B_HUMAN | CSNK2B  | 18 | 2  | 2.11 | 0.18 |
| SW:ATPG_HUMAN | ATP5C1  | 18 | 3  | 2.15 | 0.32 |

|               |         |    |    |      |      |
|---------------|---------|----|----|------|------|
| SW:NUBM_HUMAN | NDUFV1  | 18 | 7  | 2.18 | 0.99 |
| SW:UCR1_HUMAN | UQCRC1  | 18 | 8  | 2.24 | 0.43 |
| SW:DHSB_HUMAN | SDHB    | 18 | 1  | 2.24 | 0.00 |
| SW:NB8M_HUMAN | NDUFB7  | 18 | 2  | 2.27 | 0.65 |
| SW:MDHM_HUMAN | MDH2    | 18 | 27 | 2.29 | 1.04 |
| SW:UCRH_HUMAN | UQCRH   | 18 | 3  | 2.36 | 0.26 |
| SW:ETFA_HUMAN | ETFA    | 18 | 1  | 2.36 | 0.00 |
| SW:ATPA_HUMAN | ATP5A1  | 18 | 8  | 2.38 | 0.42 |
| SW:UCR2_HUMAN | UQCRC2  | 18 | 1  | 2.42 | 0.00 |
| SW:THIL_HUMAN | ACAT1   | 18 | 2  | 2.44 | 0.44 |
| SW:UCRI_HUMAN | UQCRES1 | 18 | 4  | 2.45 | 0.39 |
| SW:PPCM_HUMAN | PCK2    | 18 | 6  | 2.45 | 1.09 |
| SW:DHSA_HUMAN | SDHA    | 18 | 5  | 2.48 | 0.32 |
| SW:ADT2_HUMAN | SLC25A5 | 18 | 8  | 2.53 | 1.17 |
| SW:ADT3_HUMAN | SLC25A6 | 18 | 1  | 2.57 | 0.00 |
| SW:ATPQ_HUMAN | ATP5H   | 18 | 3  | 2.67 | 0.53 |

|                                          |        |    |    |      |      |
|------------------------------------------|--------|----|----|------|------|
| SW:NIPM_HUMAN                            | NDUFS5 | 18 | 2  | 2.69 | 0.02 |
| SW:COXG_HUMAN                            | COX6B  | 18 | 6  | 2.77 | 1.08 |
| <b>Lipid, Fat, and Sterol Metabolism</b> |        |    |    |      |      |
| SW:FDFT_HUMAN                            | FDFT1  | 19 | 1  | 0.22 | 0.00 |
| GPN:Y14436_1                             | PPAP2A | 19 | 2  | 0.27 | 0.02 |
| GP:D89053_1                              | FACL3  | 19 | 13 | 0.29 | 0.13 |
| SW:ACDV_HUMAN                            | ACADVL | 19 | 1  | 0.32 | 0.00 |
| SW:FAS_HUMAN                             | FASN   | 19 | 90 | 0.34 | 0.15 |
| SW:ERG7_HUMAN                            | LSS    | 19 | 1  | 0.37 | 0.00 |
| SW:COA1_HUMAN                            | ACACA  | 19 | 2  | 0.41 | 0.05 |
| SW:ACLY_HUMAN                            | ACLY   | 19 | 6  | 0.44 | 0.09 |
| SW:LDLR_HUMAN                            | LDLR   | 19 | 3  | 0.55 | 0.04 |
| SW:NSDL_HUMAN                            | NSDHL  | 19 | 6  | 0.58 | 0.16 |
| SW:CP51_HUMAN                            | CYP51  | 19 | 3  | 0.71 | 0.04 |
| SW:LCFA_HUMAN                            | FACL1  | 19 | 14 | 0.81 | 0.13 |
| SW:LCB2_HUMAN                            | SPTLC2 | 19 | 1  | 0.82 | 0.00 |
| SW:DRS1_HUMAN                            | PECI   | 19 | 9  | 0.83 | 0.22 |
| SWN:P23_HUMAN                            | p23    | 19 | 2  | 0.85 | 0.01 |

|               |         |    |    |      |      |
|---------------|---------|----|----|------|------|
| SW:KIME_HUMAN | MVK     | 19 | 1  | 0.91 | 0.00 |
| GP:U66669_1   | HIBCH   | 19 | 1  | 0.91 | 0.00 |
| SW:ASAH_HUMAN | ASAH    | 19 | 1  | 0.99 | 0.00 |
| GP:AF126782_1 | RETSR1  | 19 | 8  | 1.06 | 0.21 |
| SW:OXYB_HUMAN | OSBP    | 19 | 3  | 1.08 | 0.26 |
| SW:CPT2_HUMAN | CPT2    | 19 | 1  | 1.08 | 0.00 |
| SW:FAAH_HUMAN | FAAH    | 19 | 3  | 1.10 | 0.22 |
| SW:HBP_HUMAN  | HDLBP   | 19 | 3  | 1.11 | 0.27 |
| SW:NPC1_HUMAN | NPC1    | 19 | 1  | 1.16 | 0.00 |
| SW:PEBP_HUMAN | PBP     | 19 | 2  | 1.17 | 0.15 |
| SW:GLCM_HUMAN | GBA     | 19 | 2  | 1.21 | 0.09 |
| SW:PI52_HUMAN | PIP5K2A | 19 | 1  | 1.24 | 0.00 |
| GP:AF034544_1 | DHCR7   | 19 | 6  | 1.25 | 0.30 |
| SW:THIK_HUMAN | ACAA1   | 19 | 15 | 1.26 | 0.25 |
| SW:CPT1_HUMAN | CPT1A   | 19 | 1  | 1.30 | 0.00 |
| SW:D3D2_HUMAN | DCI     | 19 | 3  | 1.31 | 0.20 |

|                |               |    |    |      |      |
|----------------|---------------|----|----|------|------|
| SW:SAP_HUMAN   | PSAP          | 19 | 14 | 1.31 | 0.91 |
| GP:AB037108_1  | TPRA40        | 19 | 2  | 1.36 | 0.09 |
| SW:ECH1_HUMAN  | ECH1          | 19 | 28 | 1.36 | 0.24 |
| SW:SAP3_HUMAN  | GM2A          | 19 | 3  | 1.39 | 0.14 |
| GP:AF035959_1  | PPAP2C        | 19 | 1  | 1.42 | 0.00 |
| SW:OCRL_HUMAN  | OCRL          | 19 | 2  | 1.42 | 1.00 |
| GP:AB033078_1  | SGPL1         | 19 | 2  | 1.44 | 0.06 |
| SWN:CNE3_HUMAN | CPN3          | 19 | 28 | 1.47 | 0.27 |
| SW:NLTP_HUMAN  | SCP2          | 19 | 2  | 1.50 | 0.06 |
| SW:CAOP_HUMAN  | ACOX1 or ACOX | 19 | 1  | 1.53 | 0.00 |
| SW:PKBS_HUMAN  | BZRP          | 19 | 2  | 1.57 | 0.04 |
| SW:PXF_HUMAN   | PXF           | 19 | 1  | 1.61 | 0.00 |
| SW:DHA4_HUMAN  | ALDH3A2       | 19 | 2  | 1.62 | 0.67 |
| SW:HCD2_HUMAN  | HADH2         | 19 | 4  | 1.67 | 0.12 |
| SW:DHB4_HUMAN  | HSD17B4       | 19 | 12 | 1.74 | 0.52 |
| SW:AGAL_HUMAN  | GLA           | 19 | 1  | 1.80 | 0.00 |
| SW:ADRO_HUMAN  | FDXR          | 19 | 1  | 1.82 | 0.00 |



|                |         |    |    |      |      |
|----------------|---------|----|----|------|------|
| SW:ECHB_HUMAN  | HADHB   | 19 | 4  | 1.87 | 0.07 |
| SW:CNBP_HUMAN  | ZNF9    | 19 | 2  | 1.87 | 0.27 |
| SW:MAOM_HUMAN  | ME2     | 19 | 2  | 1.96 | 0.04 |
| SW:ECHA_HUMAN  | HADHA   | 19 | 13 | 1.97 | 0.65 |
| SW:ETFB_HUMAN  | ETFB    | 19 | 2  | 1.99 | 0.48 |
| GP:AL023805_1  | PLCB4   | 19 | 6  | 2.00 | 0.24 |
| SW:GST3_HUMAN  | MGST3   | 19 | 2  | 2.31 | 0.83 |
| SW:ETFA_HUMAN  | ETFA    | 19 | 1  | 2.36 | 0.00 |
| SW:MAZ_HUMAN   | MAZ     | 19 | 1  | 2.37 | 0.00 |
| SW:THIL_HUMAN  | ACAT1   | 19 | 2  | 2.44 | 0.44 |
| GP:AF161397_1  | HPCL2   | 19 | 2  | 2.53 | 0.16 |
| SW:TPP1_HUMAN  | CLN2    | 19 | 1  | 2.62 | 0.00 |
| GP:AF002668_1  | DEGS    | 19 | 1  | 3.29 | 0.00 |
| SW:PA2M_HUMAN  | PLA2G2A | 19 | 3  | 3.94 | 1.93 |
| GP:AJ002744_1  | GALNT7  | 19 | 1  | 4.00 | 0.00 |
| <b>Meiosis</b> |         |    |    |      |      |

|                        |          |    |   |      |      |
|------------------------|----------|----|---|------|------|
| PIR2:JE0334            | RUVBL1   | 20 | 3 | 1.16 | 0.14 |
| SW:CTOG_HUMAN          | KIAA0097 | 20 | 4 | 1.43 | 0.10 |
| <b>Membrane Fusion</b> |          |    |   |      |      |
| SW:SNAG_HUMAN          | NAPG     | 21 | 2 | 0.43 | 0.31 |
| SW:RB3B_HUMAN          | RAB3B    | 21 | 2 | 0.50 | 0.00 |
| SW:RB4A_HUMAN          | RAB4A    | 21 | 1 | 0.56 | 0.00 |
| SW:STB3_HUMAN          | STXBP3   | 21 | 6 | 0.66 | 0.15 |
| SW:RB35_HUMAN          | RAB35    | 21 | 1 | 0.73 | 0.00 |
| SW:SN23_HUMAN          | SNAP23   | 21 | 2 | 0.74 | 0.06 |
| SW:RB3D_HUMAN          | RAB3D    | 21 | 1 | 0.74 | 0.00 |
| SW:RAB2_HUMAN          | RAB2     | 21 | 5 | 0.77 | 0.05 |
| SW:ANX7_HUMAN          | ANXA7    | 21 | 4 | 0.87 | 0.02 |
| GP:AF044670_1          | VAP33    | 21 | 2 | 0.88 | 0.24 |
| GP:AF004563_1          | STXBP1   | 21 | 4 | 0.89 | 0.26 |
| SWN:STX8_HUMAN         | STX8     | 21 | 1 | 0.93 | 0.00 |
| GP:AF032922_1          | UNC-18C  | 21 | 2 | 1.09 | 0.03 |
| SW:STB2_HUMAN          | STXBP2   | 21 | 4 | 1.09 | 0.34 |
| SW:NSF_HUMAN           | NSF      | 21 | 6 | 1.12 | 0.16 |
| SW:RAB7_HUMAN          | RAB7     | 21 | 1 | 1.16 | 0.00 |
| SW:RB13_HUMAN          | RAB13    | 21 | 1 | 1.49 | 0.00 |
| <b>Mitosis</b>         |          |    |   |      |      |
| SW:DYN2_HUMAN          | DNM2     | 23 | 1 | 0.81 | 0.00 |
| GP:AB002323_1          | DNCH1    | 23 | 8 | 0.83 | 0.29 |

|                                      |               |    |    |      |      |
|--------------------------------------|---------------|----|----|------|------|
| PIR2:T03842                          | SKB1          | 23 | 5  | 0.83 | 0.18 |
| SW:G25B_HUMAN                        | CDC42         | 23 | 13 | 0.90 | 0.13 |
| SWN:STX8_HUMAN                       | STX8          | 23 | 1  | 0.93 | 0.00 |
| SW:DYNA_HUMAN                        | DCTN1         | 23 | 1  | 0.98 | 0.00 |
| SW:RAN_HUMAN                         | RAN           | 23 | 3  | 0.98 | 0.04 |
| PIR2:T47172                          | CORO1C or CRN | 23 | 5  | 1.08 | 0.38 |
| SW:PP1A_HUMAN                        | PPP1CA        | 23 | 2  | 1.09 | 0.03 |
| PIR2:T00387                          | CLASP1        | 23 | 1  | 1.18 | 0.00 |
| SW:CTOG_HUMAN                        | KIAA0097      | 23 | 4  | 1.43 | 0.10 |
| SW:CUL2_HUMAN                        | CUL2          | 23 | 1  | 1.64 | 0.00 |
| SW:BUB3_HUMAN                        | BUB3          | 23 | 2  | 1.73 | 0.02 |
| <b>Nuclear-Cytoplasmic Transport</b> |               |    |    |      |      |
| SW:IMB3_HUMAN                        | KPNB3         | 24 | 1  | 0.26 | 0.00 |
| SW:IMA1_HUMAN                        | KPNA1         | 24 | 1  | 0.33 | 0.00 |
| SW:COF1_HUMAN                        | CFL1          | 24 | 14 | 0.55 | 0.21 |
| SW:IMB1_HUMAN                        | KPNB1         | 24 | 1  | 0.76 | 0.00 |
| SW:ARS1_HUMAN                        | ASNA1         | 24 | 1  | 0.82 | 0.00 |
| SW:C211_HUMAN                        | PTTG1IP       | 24 | 2  | 0.98 | 0.03 |

|                              |         |    |    |      |      |
|------------------------------|---------|----|----|------|------|
| SW:RAN_HUMAN                 | RAN     | 24 | 3  | 0.98 | 0.04 |
| SW:IMB2_HUMAN                | KPNB2   | 24 | 1  | 1.06 | 0.00 |
| SW:CRTC_HUMAN                | CALR    | 24 | 21 | 1.09 | 0.26 |
| SW:ER60_HUMAN                | ERP60   | 24 | 17 | 1.21 | 0.54 |
| SW:PAB1_HUMAN                | PABPC1  | 24 | 13 | 1.22 | 0.44 |
| SW:RCC_HUMAN                 | CHC1    | 24 | 2  | 1.30 | 0.00 |
| PIR2:T13159                  | E1B-AP5 | 24 | 3  | 1.38 | 0.41 |
| GP:AF037448_1                | NSAP1   | 24 | 4  | 1.45 | 0.22 |
| SW:CAS_HUMAN                 | CSE1L   | 24 | 3  | 1.46 | 0.18 |
| SW:FXR2_HUMAN                | FXR2    | 24 | 3  | 1.56 | 0.30 |
| GP:D89729_1                  | XPO1    | 24 | 1  | 1.60 | 0.00 |
| SW:NTF2_HUMAN                | NTF2    | 24 | 2  | 2.12 | 0.23 |
| SW:ROA1_HUMAN                | HNRPA1  | 24 | 11 | 2.48 | 0.85 |
| SW:FXR1_HUMAN                | FXR1    | 24 | 1  | 2.74 | 0.00 |
| <b>Nucleotide Metabolism</b> |         |    |    |      |      |
| SW:IMA1_HUMAN                | KPNA1   | 25 | 1  | 0.33 | 0.00 |
| SW:ACLY_HUMAN                | ACLY    | 25 | 6  | 0.44 | 0.09 |

|                |          |    |   |      |      |
|----------------|----------|----|---|------|------|
| GP:AB007851_1  | PRPSAP2  | 25 | 4 | 0.51 | 0.10 |
| GP:AB011173_1  | KIAA0601 | 25 | 1 | 0.59 | 0.00 |
| SW:HS71_HUMAN  | HSPA1A   | 25 | 6 | 0.62 | 0.14 |
| SW:PUR8_HUMAN  | ADSL     | 25 | 2 | 0.80 | 0.00 |
| SW:AMD2_HUMAN  | AMPD2    | 25 | 1 | 0.81 | 0.00 |
| PIR2:S71460    | PRPS1    | 25 | 2 | 0.82 | 0.12 |
| SW:SYA_HUMAN   | AARS     | 25 | 1 | 0.83 | 0.00 |
| SWN:ENT1_HUMAN | ENT1     | 25 | 1 | 0.83 | 0.00 |
| SW:CST1_HUMAN  | CSTF1    | 25 | 1 | 0.93 | 0.00 |
| SW:SYQ_HUMAN   | QARS     | 25 | 2 | 0.94 | 0.20 |
| SW:IMD2_HUMAN  | IMPDH2   | 25 | 8 | 0.95 | 0.32 |
| SW:PUR6_HUMAN  | PAICS    | 25 | 7 | 0.99 | 0.09 |
| SW:RINI_HUMAN  | RNH      | 25 | 1 | 1.01 | 0.00 |
| GP:AF132941_1  | LOC51068 | 25 | 1 | 1.02 | 0.00 |
| PIR2:A57017    | ABCE1    | 25 | 5 | 1.03 | 0.03 |
| SW:NPM_HUMAN   | NPM1     | 25 | 3 | 1.11 | 0.14 |
| SW:NDK6_HUMAN  | NME2     | 25 | 1 | 1.22 | 0.00 |

|                |          |    |    |      |      |
|----------------|----------|----|----|------|------|
| SW:PAB1_HUMAN  | PABPC1   | 25 | 13 | 1.22 | 0.44 |
| SWN:SYFB_HUMAN | FRSB     | 25 | 4  | 1.25 | 0.44 |
| SW:ROF_HUMAN   | HNRPF    | 25 | 3  | 1.37 | 0.10 |
| PIR2:T13159    | E1B-AP5  | 25 | 3  | 1.38 | 0.41 |
| PIR2:T02673    | HNRPR    | 25 | 3  | 1.43 | 0.18 |
| GP:U85625_1    | RNASE6PL | 25 | 3  | 1.44 | 0.04 |
| GP:AF037448_1  | NSAP1    | 25 | 4  | 1.45 | 0.22 |
| SW:PYR1_HUMAN  | CAD      | 25 | 6  | 1.47 | 0.46 |
| SW:ROK_HUMAN   | HNRPK    | 25 | 6  | 1.51 | 0.30 |
| SW:SMD3_HUMAN  | SNRPD3   | 25 | 1  | 1.55 | 0.00 |
| SW:PSS1_HUMAN  | PAPSS1   | 25 | 1  | 1.56 | 0.00 |
| SW:ROA0_HUMAN  | HNRPA0   | 25 | 2  | 1.64 | 0.40 |
| SW:ROH1_HUMAN  | HNRPH1   | 25 | 4  | 1.66 | 0.22 |
| SW:DDX1_HUMAN  | DDX1     | 25 | 6  | 1.67 | 0.10 |
| PIR2:JW0079    | HNRPDL   | 25 | 1  | 1.72 | 0.00 |
| GP:AC003972_1  | RENT1    | 25 | 1  | 1.74 | 0.00 |
| SW:RUXF_HUMAN  | SNRPF    | 25 | 1  | 1.76 | 0.00 |
| GP:AF177344_1  | FLJ10581 | 25 | 1  | 1.89 | 0.00 |

|               |          |    |    |      |      |
|---------------|----------|----|----|------|------|
| PIR2:T09073   | SFRS2IP  | 25 | 1  | 1.89 | 0.00 |
| PIR2:I55595   | RNPC2    | 25 | 1  | 1.92 | 0.00 |
| PIR2:S78046   | RNASE6   | 25 | 3  | 1.94 | 0.00 |
| SW:DRN2_HUMAN | DNASE2   | 25 | 3  | 2.01 | 0.42 |
| SW:SMD2_HUMAN | SNRPD2   | 25 | 2  | 2.02 | 0.82 |
| SW:U2AF_HUMAN | U2AF65   | 25 | 1  | 2.05 | 0.00 |
| GP:D21163_1   | U5-116KD | 25 | 1  | 2.11 | 0.00 |
| SW:RU17_HUMAN | SNRP70   | 25 | 3  | 2.11 | 0.26 |
| PIR2:A54601   | HNRPD    | 25 | 9  | 2.17 | 0.65 |
| SW:NHPX_HUMAN | NHP2L1   | 25 | 2  | 2.21 | 0.20 |
| SW:DDX5_HUMAN | DDX5     | 25 | 1  | 2.27 | 0.00 |
| SW:U2AG_HUMAN | U2AF35   | 25 | 2  | 2.34 | 0.02 |
| SW:ROU_HUMAN  | HNRPU    | 25 | 29 | 2.48 | 0.62 |
| SW:ROA1_HUMAN | HNRPA1   | 25 | 11 | 2.48 | 0.85 |
| SW:DD17_HUMAN | DDX17    | 25 | 1  | 2.58 | 0.00 |
| SW:Y017_HUMAN | SF3B3    | 25 | 7  | 2.63 | 0.59 |
| SW:NR54_HUMAN | NONO     | 25 | 2  | 3.38 | 1.09 |
| SW:SFR7_HUMAN | SFRS7    | 25 | 2  | 3.66 | 0.49 |

| Other Metabolism |         |    |   |      |      |
|------------------|---------|----|---|------|------|
| SW:TRFL_HUMAN    | LTF     | 26 | 2 | 0.28 | 0.03 |
| SW:SAH2_HUMAN    | AHCYL1  | 26 | 2 | 0.43 | 0.04 |
| SW:COMT_HUMAN    | COMT    | 26 | 4 | 0.44 | 0.19 |
| SW:ESTD_HUMAN    | ESD     | 26 | 1 | 0.53 | 0.00 |
| SW:GLNA_HUMAN    | GLUL    | 26 | 1 | 0.53 | 0.00 |
| SW:MRP1_HUMAN    | ABCC1   | 26 | 4 | 0.58 | 0.08 |
| PIR2:T46412      | NEDD4   | 26 | 1 | 0.88 | 0.00 |
| GP:AC005545_2    | AP3D1   | 26 | 2 | 0.93 | 0.18 |
| SW:PUR6_HUMAN    | PAICS   | 26 | 7 | 0.99 | 0.09 |
| SW:PON2_HUMAN    | PON2    | 26 | 1 | 1.01 | 0.00 |
| SW:DOPD_HUMAN    | DDT     | 26 | 1 | 1.02 | 0.00 |
| SW:HEMZ_HUMAN    | FECH    | 26 | 8 | 1.06 | 0.19 |
| GP:AF126782_1    | RETSDR1 | 26 | 8 | 1.06 | 0.21 |
| SW:A4_HUMAN      | APP     | 26 | 5 | 1.09 | 0.19 |
| SW:FLRE_HUMAN    | BLVRB   | 26 | 3 | 1.12 | 0.12 |
| SW:HYEP_HUMAN    | EPHX1   | 26 | 6 | 1.13 | 0.03 |



|               |                 |    |    |      |      |
|---------------|-----------------|----|----|------|------|
| SW:PEBP_HUMAN | PBP             | 26 | 2  | 1.17 | 0.15 |
| SW:IPYR_HUMAN | PP              | 26 | 1  | 1.20 | 0.00 |
| SW:TRSR_HUMAN | TFRC            | 26 | 2  | 1.20 | 0.12 |
| SW:DYL1_HUMAN | PIN             | 26 | 10 | 1.24 | 0.34 |
| PIR2:I37405   | GALNT1          | 26 | 4  | 1.29 | 0.30 |
| SW:OGT1_HUMAN | OGT             | 26 | 1  | 1.34 | 0.00 |
| SW:MMSA_HUMAN | MMSDH           | 26 | 2  | 1.48 | 0.10 |
| SW:AOFB_HUMAN | MAOB            | 26 | 1  | 1.59 | 0.00 |
| SW:C1TC_HUMAN | MTHFD1          | 26 | 6  | 1.65 | 0.45 |
| SW:FRIH_HUMAN | FTH1            | 26 | 7  | 1.67 | 0.26 |
| SW:AOFB_HUMAN | MAOA            | 26 | 15 | 1.68 | 0.50 |
| GP:AF277719_1 | C(27)-3BETA-HSD | 26 | 1  | 2.02 | 0.00 |
| SW:SPHM_HUMAN | SGSH            | 26 | 1  | 2.03 | 0.00 |
| GP:X92689_1   | GALNAC-T3       | 26 | 3  | 2.26 | 0.17 |
| SW:ATCK_HUMAN | ATP2C1          | 26 | 2  | 2.59 | 0.30 |
| GP:AL023881_1 | DECR1           | 26 | 1  | 2.78 | 0.00 |
| SW:SORC_HUMAN | SRI             | 26 | 2  | 2.86 | 2.11 |
|               |                 |    |    |      |      |

| Phosphate Metabolism  |        |    |    |      |      |
|-----------------------|--------|----|----|------|------|
| SW:IPYR_HUMAN         | PP     | 27 | 1  | 1.20 | 0.00 |
| Pol III Transcription |        |    |    |      |      |
| SW:RO60_HUMAN         | SSA2   | 28 | 2  | 1.53 | 0.01 |
| Pol II Transcription  |        |    |    |      |      |
| SW:PRS8_HUMAN         | SUG1   | 29 | 9  | 0.66 | 0.15 |
| SW:PLAK_HUMAN         | DP3    | 29 | 12 | 0.73 | 0.19 |
| GP:AF306723_1         | JUP    | 29 | 1  | 0.78 | 0.00 |
| SW:CTNB_HUMAN         | CTNNB1 | 29 | 19 | 0.79 | 0.26 |
| SW:HIP_HUMAN          | ST13   | 29 | 5  | 0.86 | 0.10 |
| PIR2:T46412           | NEDD4  | 29 | 1  | 0.88 | 0.00 |
| SW:BTF3_HUMAN         | BTF3   | 29 | 1  | 0.91 | 0.00 |
| SW:ENOA_HUMAN         | ENO1   | 29 | 3  | 1.01 | 0.08 |
| SW:TCPD_HUMAN         | CCT4   | 29 | 4  | 1.01 | 0.17 |
| GP:AF203687_1         | PREB   | 29 | 2  | 1.09 | 0.06 |
| SW:CRTC_HUMAN         | CALR   | 29 | 21 | 1.09 | 0.26 |
| SW:TF1B_HUMAN         | TIF1B  | 29 | 4  | 1.10 | 0.26 |
| PIR2:JE0334           | RUVBL1 | 29 | 3  | 1.16 | 0.14 |
| GP:AB006572_1         | RMP    | 29 | 1  | 1.17 | 0.00 |

|                                 |          |    |    |      |      |
|---------------------------------|----------|----|----|------|------|
| GP:AF000560_1                   | TIP20    | 29 | 2  | 1.21 | 0.57 |
| GP:AF084523_1                   | CREG     | 29 | 1  | 1.22 | 0.00 |
| SW:P2BA_HUMAN                   | PPP3CA   | 29 | 3  | 1.30 | 0.16 |
| PIR2:I59405                     | TCEB2    | 29 | 2  | 1.32 | 0.00 |
| SW:PPOL_HUMAN                   | ADPRT    | 29 | 2  | 1.43 | 0.42 |
| SW:APE1_HUMAN                   | APEX     | 29 | 13 | 1.57 | 0.38 |
| SW:CNBP_HUMAN                   | ZNF9     | 29 | 2  | 1.87 | 0.27 |
| GP:AF007833_1                   | ZFP67    | 29 | 1  | 2.03 | 0.00 |
| SW:RFA1_HUMAN                   | RPA1     | 29 | 1  | 2.30 | 0.00 |
| SW:MAZ_HUMAN                    | MAZ      | 29 | 1  | 2.37 | 0.00 |
| SW:PUR_HUMAN                    | PURA     | 29 | 2  | 2.62 | 0.17 |
| <b>Protein Complex Assembly</b> |          |    |    |      |      |
| GP:AF015926_1                   | SLC9A3R1 | 31 | 1  | 0.47 | 0.00 |
| PIR2:T13151                     | CD2AP    | 31 | 3  | 0.58 | 0.01 |
| GP:AB008515_1                   | RanBPM   | 31 | 1  | 0.74 | 0.00 |
| SW:CAPB_HUMAN                   | CAPZB    | 31 | 8  | 0.76 | 0.13 |
| SW:DAG1_HUMAN                   | DAG1     | 31 | 1  | 0.77 | 0.00 |
| GP:U45976_1                     | PICALM   | 31 | 1  | 0.85 | 0.00 |

|                            |         |    |   |      |      |
|----------------------------|---------|----|---|------|------|
| GP:AF044670_1              | VAP33   | 31 | 2 | 0.88 | 0.24 |
| SW:CAZ2_HUMAN              | CAPZA2  | 31 | 1 | 0.98 | 0.00 |
| SW:HS9A_HUMAN              | HSPCA   | 31 | 7 | 0.99 | 0.41 |
| SW:CYP4_HUMAN              | PPID    | 31 | 1 | 1.19 | 0.00 |
| PIR2:I59405                | TCEB2   | 31 | 2 | 1.32 | 0.00 |
| PIR2:T09073                | SFRS2IP | 31 | 1 | 1.89 | 0.00 |
| SW:Y017_HUMAN              | SF3B3   | 31 | 7 | 2.63 | 0.59 |
| GP:AB006537_1              | IL1RAP  | 31 | 1 | 3.20 | 0.00 |
| SW:LMG1_HUMAN              | LAMC1   | 31 | 1 | 3.60 | 0.00 |
| <b>Protein Degradation</b> |         |    |   |      |      |
| SW:KLK2_HUMAN              | KLK2    | 32 | 1 | 0.12 | 0.00 |
| SW:PRCE_HUMAN              | PSMB5   | 32 | 2 | 0.25 | 0.00 |
| PIR2:JC6523                | PSMD12  | 32 | 1 | 0.47 | 0.00 |
| GP:AB029020_1              | VDU1    | 32 | 1 | 0.48 | 0.00 |
| SW:UBCC_HUMAN              | UBE2N   | 32 | 1 | 0.53 | 0.00 |
| SW:SNAA_HUMAN              | NAPA    | 32 | 3 | 0.56 | 0.01 |
| SW:PRCZ_HUMAN              | PSMA5   | 32 | 4 | 0.60 | 0.04 |
| GP:U86782_1                | POH1    | 32 | 3 | 0.66 | 0.19 |

|               |        |    |    |      |      |
|---------------|--------|----|----|------|------|
| SW:PRS8_HUMAN | SUG1   | 32 | 9  | 0.66 | 0.15 |
| GP:AB012191_1 | NEDD8  | 32 | 2  | 0.69 | 0.04 |
| SW:NEP_HUMAN  | MME    | 32 | 34 | 0.71 | 0.19 |
| SW:PRS7_HUMAN | PSMC2  | 32 | 7  | 0.75 | 0.17 |
| SW:PRXS_HUMAN | PSMC6  | 32 | 5  | 0.78 | 0.18 |
| SW:PRCD_HUMAN | PSMB6  | 32 | 1  | 0.79 | 0.00 |
| SW:PSD2_HUMAN | PSMD2  | 32 | 1  | 0.80 | 0.00 |
| SW:PRSC_HUMAN | PSMD7  | 32 | 2  | 0.81 | 0.00 |
| SW:PSD1_HUMAN | PSMD1  | 32 | 11 | 0.81 | 0.20 |
| SW:Y253_HUMAN | NCSTN  | 32 | 2  | 0.81 | 0.05 |
| SW:PRC5_HUMAN | PSC5   | 32 | 2  | 0.82 | 0.03 |
| PIR2:JC6524   | PSMD11 | 32 | 3  | 0.84 | 0.08 |
| SW:PRC2_HUMAN | PSMA1  | 32 | 4  | 0.85 | 0.05 |
| GP:D38048_1   | PSMB7  | 32 | 1  | 0.88 | 0.00 |
| SW:PRC8_HUMAN | PSMA3  | 32 | 2  | 0.88 | 0.06 |
| GP:AB009398_1 | PSMD13 | 32 | 5  | 0.88 | 0.24 |
| PIR2:T46412   | NEDD4  | 32 | 1  | 0.88 | 0.00 |
| SW:UB5A_HUMAN | UBE2D1 | 32 | 2  | 0.90 | 0.01 |

|                |        |    |    |      |      |
|----------------|--------|----|----|------|------|
| SW:PRCI_HUMAN  | PSMA6  | 32 | 12 | 0.97 | 0.27 |
| SW:PRS4_HUMAN  | PSMC1  | 32 | 12 | 0.99 | 0.17 |
| SW:TPP2_HUMAN  | TPP2   | 32 | 5  | 1.00 | 0.14 |
| SW:DIAC_HUMAN  | CTBS   | 32 | 1  | 1.00 | 0.00 |
| GP:U41806_1    | SQSTM1 | 32 | 4  | 1.01 | 0.21 |
| GP:AB002310_1  | UREB1  | 32 | 3  | 1.04 | 0.06 |
| SW:PSD4_HUMAN  | PSMD4  | 32 | 5  | 1.06 | 0.29 |
| SWN:PSA7_HUMAN | PSMA7  | 32 | 4  | 1.06 | 0.22 |
| PIR2:T14762    | ACE2   | 32 | 1  | 1.10 | 0.00 |
| SW:UBPA_HUMAN  | USP10  | 32 | 1  | 1.10 | 0.00 |
| SWN:UBPF_HUMAN | USP15  | 32 | 3  | 1.10 | 0.11 |
| GP:AF039689_1  | STUB1  | 32 | 4  | 1.16 | 0.13 |
| SW:CATD_HUMAN  | CTSD   | 32 | 17 | 1.18 | 0.28 |
| GP:D87684_1    | UBXD2  | 32 | 6  | 1.22 | 0.16 |
| SW:UBCI_HUMAN  | UBE2I  | 32 | 2  | 1.28 | 0.02 |
| PIR2:I59405    | TCEB2  | 32 | 2  | 1.32 | 0.00 |
| SW:LONM_HUMAN  | PRSS15 | 32 | 4  | 1.40 | 0.68 |
| SW:PRTP_HUMAN  | PPGB   | 32 | 2  | 1.45 | 0.04 |

|                        |        |    |   |      |      |
|------------------------|--------|----|---|------|------|
| SW:PPT_HUMAN           | PPT1   | 32 | 7 | 1.57 | 0.39 |
| SW:CATB_HUMAN          | CTSB   | 32 | 5 | 1.62 | 0.25 |
| SW:CUL2_HUMAN          | CUL2   | 32 | 1 | 1.64 | 0.00 |
| SW:CATH_HUMAN          | CTSH   | 32 | 1 | 2.00 | 0.00 |
| SW:RL40_HUMAN          | UBA52  | 32 | 3 | 2.00 | 0.50 |
| SW:TPP1_HUMAN          | CLN2   | 32 | 1 | 2.62 | 0.00 |
| GP:AF057145_1          | ST14   | 32 | 1 | 3.98 | 0.00 |
| GP:AB028980_1          | USP24  | 32 | 1 | 9.55 | 0.00 |
| <b>Protein Folding</b> |        |    |   |      |      |
| SW:TRAL_HUMAN          | HSP75  | 33 | 1 | 0.28 | 0.00 |
| SW:FKB5_HUMAN          | FKBP5  | 33 | 1 | 0.28 | 0.00 |
| SW:HS7C_HUMAN          | HSPA8  | 33 | 6 | 0.46 | 0.06 |
| PIR2:JC1365            | FKBP2  | 33 | 3 | 0.60 | 0.14 |
| SW:TCPE_HUMAN          | CCT5   | 33 | 4 | 0.68 | 0.14 |
| GP:AF227905_1          | UGCGL1 | 33 | 1 | 0.70 | 0.00 |
| SW:TCPZ_HUMAN          | CCT6A  | 33 | 3 | 0.77 | 0.08 |
| SW:FKB1_HUMAN          | FKBP1A | 33 | 2 | 0.78 | 0.00 |

|               |          |    |    |      |      |
|---------------|----------|----|----|------|------|
| SW:CALX_HUMAN | CANX     | 33 | 4  | 0.84 | 0.04 |
| SW:ER53_HUMAN | LMAN1    | 33 | 2  | 0.84 | 0.00 |
| SW:DNJ2_HUMAN | DNAJA1   | 33 | 1  | 0.86 | 0.00 |
| SW:HIP_HUMAN  | ST13     | 33 | 5  | 0.86 | 0.10 |
| SW:TCPB_HUMAN | CCT2     | 33 | 5  | 0.90 | 0.26 |
| GP:AB015798_1 | HSJ2     | 33 | 1  | 0.91 | 0.00 |
| SW:TCPG_HUMAN | CCT3     | 33 | 7  | 0.92 | 0.12 |
| SW:CYPB_HUMAN | PPIB     | 33 | 15 | 0.94 | 0.20 |
| SW:TCPH_HUMAN | CCT7     | 33 | 2  | 0.95 | 0.10 |
| SW:TCPA_HUMAN | CCT1     | 33 | 8  | 0.99 | 0.36 |
| SW:TCPD_HUMAN | CCT4     | 33 | 4  | 1.01 | 0.17 |
| SW:CYPH_HUMAN | PPIA     | 33 | 15 | 1.04 | 0.29 |
| PIR2:T00363   | KIAA0674 | 33 | 2  | 1.08 | 0.12 |
| GP:AF039689_1 | STUB1    | 33 | 4  | 1.16 | 0.13 |
| SW:CYP4_HUMAN | PPID     | 33 | 1  | 1.19 | 0.00 |
| SW:HS9B_HUMAN | HSPCB    | 33 | 10 | 1.22 | 0.52 |
| SW:TCPQ_HUMAN | CCT8     | 33 | 3  | 1.29 | 0.06 |
| GP:AF188611_1 | HSPA5    | 33 | 1  | 1.60 | 0.00 |



|                             |        |    |    |      |      |
|-----------------------------|--------|----|----|------|------|
| SW:P60_HUMAN                | HSPD1  | 33 | 22 | 1.69 | 0.31 |
| SW:CYPM_HUMAN               | PPIF   | 33 | 1  | 2.24 | 0.00 |
| <b>Protein Modification</b> |        |    |    |      |      |
| GPN:AF099989_1              | STK39  | 34 | 2  | 0.13 | 0.00 |
| GP:AF029684_1               | IKKB   | 34 | 1  | 0.19 | 0.00 |
| SW:PRCE_HUMAN               | PSMB5  | 34 | 2  | 0.25 | 0.00 |
| SWN:AKT3_HUMAN              | AKT3   | 34 | 1  | 0.33 | 0.00 |
| SW:AAK1_HUMAN               | PRKAA1 | 34 | 2  | 0.47 | 0.00 |
| SW:UBCC_HUMAN               | UBE2N  | 34 | 1  | 0.53 | 0.00 |
| GP:AF024636_1               | STK24  | 34 | 1  | 0.59 | 0.00 |
| SW:EGFR_HUMAN               | EGFR   | 34 | 2  | 0.62 | 0.00 |
| SW:TDXN_HUMAN               | PRDX4  | 34 | 5  | 0.66 | 0.19 |
| SW:RIB1_HUMAN               | RPN1   | 34 | 1  | 0.69 | 0.00 |
| GP:AB012191_1               | NEDD8  | 34 | 2  | 0.69 | 0.04 |
| GP:AF227905_1               | UGCGL1 | 34 | 1  | 0.70 | 0.00 |
| SW:KCCB_HUMAN               | CAMK2B | 34 | 2  | 0.74 | 0.09 |
| SW:PP1B_HUMAN               | PPP1CB | 34 | 1  | 0.78 | 0.00 |

|                |        |    |    |      |      |
|----------------|--------|----|----|------|------|
| SW:P2AA_HUMAN  | PPP2CA | 34 | 7  | 0.78 | 0.11 |
| SW:SRC_HUMAN   | SRC    | 34 | 1  | 0.83 | 0.00 |
| SW:KPC1_HUMAN  | PRKCB1 | 34 | 1  | 0.85 | 0.00 |
| SW:GPS1_HUMAN  | GPS1   | 34 | 4  | 0.86 | 0.12 |
| GP:AB009398_1  | PSMD13 | 34 | 5  | 0.88 | 0.24 |
| PIR2:T46412    | NEDD4  | 34 | 1  | 0.88 | 0.00 |
| SW:UB5A_HUMAN  | UBE2D1 | 34 | 2  | 0.90 | 0.01 |
| SW:G25B_HUMAN  | CDC42  | 34 | 13 | 0.90 | 0.13 |
| SW:KIME_HUMAN  | MVK    | 34 | 1  | 0.91 | 0.00 |
| GPN:AB025194_1 | HD-PTP | 34 | 1  | 0.93 | 0.00 |
| SW:MK01_HUMAN  | MAPK1  | 34 | 1  | 0.97 | 0.00 |
| SW:LYN_HUMAN   | LYN    | 34 | 2  | 0.98 | 0.02 |
| SW:ARP2_HUMAN  | ACTR2  | 34 | 5  | 0.99 | 0.15 |
| PIR2:S52920    | ADAM10 | 34 | 9  | 1.04 | 0.18 |
| SW:KCCD_HUMAN  | CAMK2D | 34 | 3  | 1.04 | 0.01 |
| SW:KRCB_HUMAN  | AKT2   | 34 | 1  | 1.04 | 0.00 |
| GP:AB002310_1  | UREB1  | 34 | 3  | 1.04 | 0.06 |

|                |          |    |    |      |      |
|----------------|----------|----|----|------|------|
| SW:PTN1_HUMAN  | PTPN1    | 34 | 3  | 1.05 | 0.15 |
| SW:ERBB2_HUMAN | ERBB2    | 34 | 5  | 1.07 | 0.09 |
| SW:RAC1_HUMAN  | RAC1     | 34 | 18 | 1.08 | 0.53 |
| PIR2:T00363    | KIAA0674 | 34 | 2  | 1.08 | 0.12 |
| SW:P4HA_HUMAN  | P4HA1    | 34 | 3  | 1.09 | 0.11 |
| SW:PP1A_HUMAN  | PPP1CA   | 34 | 2  | 1.09 | 0.03 |
| PIR2:T14762    | ACE2     | 34 | 1  | 1.10 | 0.00 |
| SW:UBPA_HUMAN  | USP10    | 34 | 1  | 1.10 | 0.00 |
| SWN:UBPF_HUMAN | USP15    | 34 | 3  | 1.10 | 0.11 |
| SW:PDI_HUMAN   | P4HB     | 34 | 3  | 1.13 | 0.01 |
| SW:GNT2_HUMAN  | MGAT2    | 34 | 1  | 1.16 | 0.00 |
| SW:EPA7_HUMAN  | EPHA7    | 34 | 2  | 1.19 | 0.14 |
| SW:INSR_HUMAN  | INSR     | 34 | 2  | 1.22 | 0.02 |
| GP:AB028128_1  | DPM3     | 34 | 2  | 1.25 | 0.51 |
| SW:UBCL_HUMAN  | UBE2I    | 34 | 2  | 1.28 | 0.02 |
| SW:KAPA_HUMAN  | PRKACA   | 34 | 2  | 1.28 | 0.55 |
| SW:BCR_HUMAN   | BCR      | 34 | 1  | 1.29 | 0.00 |

|                |           |    |    |      |      |
|----------------|-----------|----|----|------|------|
| PIR2:I37405    | GALNT1    | 34 | 4  | 1.29 | 0.30 |
| SWN:DUSC_HUMAN | DUSP12    | 34 | 3  | 1.30 | 0.17 |
| SW:P2BA_HUMAN  | PPP3CA    | 34 | 3  | 1.30 | 0.16 |
| PIR2:JC5938    | Txnl      | 34 | 2  | 1.31 | 0.01 |
| SW:OGT1_HUMAN  | OGT       | 34 | 1  | 1.34 | 0.00 |
| GP:D87116_1    | MAP2K3    | 34 | 3  | 1.38 | 0.17 |
| SW:PPOL_HUMAN  | ADPRT     | 34 | 2  | 1.43 | 0.42 |
| SW:PTPF_HUMAN  | LAR       | 34 | 5  | 1.50 | 0.35 |
| SW:PSS1_HUMAN  | PAPSS1    | 34 | 1  | 1.56 | 0.00 |
| SW:PPT_HUMAN   | PPT1      | 34 | 7  | 1.57 | 0.39 |
| SW:PTK7_HUMAN  | PTK7      | 34 | 9  | 1.66 | 0.30 |
| PIR2:A57099    | PRKDC     | 34 | 13 | 1.74 | 0.27 |
| SW:RB48_HUMAN  | RBBP4     | 34 | 1  | 1.80 | 0.00 |
| SW:RL40_HUMAN  | UBA52     | 34 | 3  | 2.00 | 0.50 |
| SW:KC2B_HUMAN  | CSNK2B    | 34 | 2  | 2.11 | 0.18 |
| SW:MA2B_HUMAN  | MAN2B1    | 34 | 1  | 2.14 | 0.00 |
| GP:X92689_1    | GALNAC-T3 | 34 | 3  | 2.26 | 0.17 |

|                          |        |    |    |      |      |
|--------------------------|--------|----|----|------|------|
| GP:AB000449_1            | VRK1   | 34 | 2  | 2.94 | 1.64 |
| SW:CAG4_HUMAN            | SIAT4A | 34 | 1  | 2.99 | 0.00 |
| <b>Protein Synthesis</b> |        |    |    |      |      |
| SW:RS12_HUMAN            | RPS12  | 35 | 2  | 0.40 | 0.09 |
| PIR2:JC4775              | DNAJC3 | 35 | 2  | 0.51 | 0.27 |
| SW:SYTC_HUMAN            | TARS   | 35 | 4  | 0.51 | 0.06 |
| SW:IF2P_HUMAN            | IF2    | 35 | 2  | 0.65 | 0.02 |
| SW:RL7A_HUMAN            | RPL7A  | 35 | 1  | 0.67 | 0.00 |
| SW:SYG_HUMAN             | GARS   | 35 | 1  | 0.69 | 0.00 |
| SW:IF32_HUMAN            | TRIP1  | 35 | 3  | 0.72 | 0.09 |
| SW:RS4_HUMAN             | RPS4X  | 35 | 3  | 0.73 | 0.14 |
| SW:SYD_HUMAN             | DARS   | 35 | 4  | 0.77 | 0.15 |
| SW:EF11_HUMAN            | EEF1A1 | 35 | 11 | 0.78 | 0.11 |
| SW:SYA_HUMAN             | AARS   | 35 | 1  | 0.83 | 0.00 |
| SW:SYR_HUMAN             | RARS   | 35 | 7  | 0.84 | 0.08 |
| SW:SYM_HUMAN             | MARS   | 35 | 9  | 0.87 | 0.18 |
| SW:RL8_HUMAN             | RPL8   | 35 | 4  | 0.88 | 0.57 |
| PIR2:B55053              | SCYE1  | 35 | 9  | 0.88 | 0.07 |
| SW:SYEP_HUMAN            | EPRS   | 35 | 23 | 0.92 | 0.84 |

|                |               |    |    |      |      |
|----------------|---------------|----|----|------|------|
| SWN:E2BD_HUMAN | DKFZP586J0119 | 35 | 2  | 0.94 | 0.19 |
| SW:SYQ_HUMAN   | QARS          | 35 | 2  | 0.94 | 0.20 |
| SW:SYV_HUMAN   | VAR52         | 35 | 4  | 0.95 | 0.14 |
| SW:IF5A_HUMAN  | EIF5A         | 35 | 4  | 0.96 | 0.06 |
| SW:RM03_HUMAN  | MRPL3         | 35 | 1  | 0.96 | 0.00 |
| SWN:SU12_HUMAN | GC20          | 35 | 4  | 0.98 | 0.06 |
| SW:RL32_HUMAN  | RPL32         | 35 | 7  | 1.00 | 0.12 |
| GP:AF112214_1  | RPL13         | 35 | 1  | 1.01 | 0.00 |
| SW:SYK_HUMAN   | KARS          | 35 | 7  | 1.01 | 0.18 |
| GP:AB037819_1  | RRBP1         | 35 | 7  | 1.02 | 0.13 |
| GP:AF132941_1  | LOC51068      | 35 | 1  | 1.02 | 0.00 |
| SW:EF1G_HUMAN  | EEF1G         | 35 | 7  | 1.05 | 0.15 |
| SW:RS8_HUMAN   | RPS8          | 35 | 9  | 1.07 | 0.56 |
| SW:IF4G_HUMAN  | EIF4G1        | 35 | 2  | 1.08 | 0.39 |
| SW:EF2_HUMAN   | EEF2          | 35 | 39 | 1.09 | 0.20 |
| SW:SY1_HUMAN   | IARS          | 35 | 9  | 1.10 | 0.16 |
| GP:AF132939_1  | LOC51067      | 35 | 1  | 1.11 | 0.00 |
| SW:IF38_HUMAN  | EIF3S8        | 35 | 5  | 1.11 | 0.32 |
| SW:RL3_HUMAN   | RPL3          | 35 | 2  | 1.11 | 0.01 |

|                |        |    |    |      |      |
|----------------|--------|----|----|------|------|
| SW:E2BE_HUMAN  | EIF2B5 | 35 | 1  | 1.12 | 0.00 |
| SW:RL9_HUMAN   | RPL9   | 35 | 8  | 1.12 | 0.30 |
| SW:RS5_HUMAN   | RPS5   | 35 | 19 | 1.12 | 0.89 |
| SW:RS25_HUMAN  | RPS25  | 35 | 4  | 1.13 | 0.24 |
| SW:IF2A_HUMAN  | EIF2S1 | 35 | 1  | 1.16 | 0.00 |
| SW:RS29_HUMAN  | RPS29  | 35 | 1  | 1.17 | 0.00 |
| SW:RS14_HUMAN  | RPS14  | 35 | 3  | 1.20 | 0.12 |
| SW:EF12_HUMAN  | EEF1A2 | 35 | 6  | 1.22 | 0.11 |
| SW:PAB1_HUMAN  | PABPC1 | 35 | 13 | 1.22 | 0.44 |
| SW:IF2G_HUMAN  | EIF2S3 | 35 | 22 | 1.23 | 0.22 |
| SW:IF37_HUMAN  | EIF3S7 | 35 | 6  | 1.23 | 0.32 |
| SW:RL4_HUMAN   | RPL4   | 35 | 17 | 1.23 | 0.33 |
| SW:RS17_HUMAN  | RPS17  | 35 | 6  | 1.23 | 0.24 |
| SW:RS3A_HUMAN  | RPS3A  | 35 | 13 | 1.23 | 0.20 |
| GP:AF257077_1  | EIF2B3 | 35 | 2  | 1.24 | 0.11 |
| SWN:SYFB_HUMAN | FRSB   | 35 | 4  | 1.25 | 0.44 |
| SW:SR09_HUMAN  | SRP9   | 35 | 7  | 1.25 | 0.29 |
| SW:RL23_HUMAN  | RPL23  | 35 | 10 | 1.30 | 0.27 |
| SW:RS21_HUMAN  | RPS21  | 35 | 3  | 1.30 | 0.29 |
| SW:ERF1_HUMAN  | ETF1   | 35 | 1  | 1.32 | 0.00 |

|                |        |    |    |      |      |
|----------------|--------|----|----|------|------|
| SW:RL5_HUMAN   | RPL5   | 35 | 7  | 1.32 | 0.51 |
| GPN:AF293383_1 | ABCF1  | 35 | 1  | 1.33 | 0.00 |
| SW:RS11_HUMAN  | RPS11  | 35 | 8  | 1.33 | 0.07 |
| SW:RLA0_HUMAN  | RPLP0  | 35 | 14 | 1.35 | 0.20 |
| SW:R27A_HUMAN  | RPS27A | 35 | 3  | 1.38 | 0.38 |
| SW:R10A_HUMAN  | RPL10A | 35 | 1  | 1.38 | 0.00 |
| SW:EFTU_HUMAN  | TUFM   | 35 | 8  | 1.41 | 0.11 |
| SW:SYN_HUMAN   | NARS   | 35 | 4  | 1.42 | 0.19 |
| SW:IF39_HUMAN  | EIF3S9 | 35 | 5  | 1.44 | 0.20 |
| SW:RL2A_HUMAN  | RPL27A | 35 | 7  | 1.44 | 0.56 |
| SW:RSP4_HUMAN  | LAMR1  | 35 | 7  | 1.44 | 0.05 |
| SW:RL18_HUMAN  | RPL18  | 35 | 5  | 1.49 | 0.46 |
| SW:RL3L_HUMAN  | RPL3L  | 35 | 11 | 1.51 | 0.24 |
| SW:RS6_HUMAN   | RPS6   | 35 | 5  | 1.52 | 0.13 |
| SW:IF34_HUMAN  | EIF3S4 | 35 | 1  | 1.53 | 0.00 |
| SW:RL10_HUMAN  | RPL10  | 35 | 14 | 1.53 | 1.04 |
| SW:RL12_HUMAN  | RPL12  | 35 | 35 | 1.62 | 0.58 |
| SW:RL14_HUMAN  | RPL14  | 35 | 23 | 1.63 | 0.47 |
| SW:RL17_HUMAN  | RPL17  | 35 | 4  | 1.63 | 0.06 |
| SW:DDX1_HUMAN  | DDX1   | 35 | 6  | 1.67 | 0.10 |
| SW:R37A_HUMAN  | RPL37A | 35 | 2  | 1.69 | 0.23 |



|                              |          |    |    |      |      |
|------------------------------|----------|----|----|------|------|
| SW:IF2B_HUMAN                | EIF2S2   | 35 | 2  | 1.70 | 0.48 |
| SW:RL44_HUMAN                | RPL44    | 35 | 4  | 1.80 | 0.47 |
| SW:RL40_HUMAN                | UBA52    | 35 | 3  | 2.00 | 0.50 |
| SW:RL24_HUMAN                | RPL24    | 35 | 6  | 2.02 | 0.10 |
| SW:DDX6_HUMAN                | DDX6     | 35 | 3  | 2.06 | 0.72 |
| SW:RS16_HUMAN                | RPS16    | 35 | 8  | 2.18 | 0.76 |
| SW:RS20_HUMAN                | RPS20    | 35 | 1  | 2.42 | 0.00 |
| SW:RS2_HUMAN                 | RPS2     | 35 | 7  | 2.46 | 1.54 |
| SW:IF4E_HUMAN                | EIF4E    | 35 | 1  | 2.94 | 0.00 |
| <b>Protein Translocation</b> |          |    |    |      |      |
| SW:IMB3_HUMAN                | KPNB3    | 36 | 1  | 0.26 | 0.00 |
| SW:IMA1_HUMAN                | KPNA1    | 36 | 1  | 0.33 | 0.00 |
| GP:AF015926_1                | SLC9A3R1 | 36 | 1  | 0.47 | 0.00 |
| SW:LDLR_HUMAN                | LDLR     | 36 | 3  | 0.55 | 0.04 |
| SW:IMB1_HUMAN                | KPNB1    | 36 | 1  | 0.76 | 0.00 |
| SW:EZRI_HUMAN                | VIL2     | 36 | 1  | 0.80 | 0.00 |
| SW:CALX_HUMAN                | CANX     | 36 | 4  | 0.84 | 0.04 |
| SW:ER53_HUMAN                | LMAN1    | 36 | 2  | 0.84 | 0.00 |
| SW:MPRI_HUMAN                | IGF2R    | 36 | 76 | 0.86 | 0.21 |

|               |          |    |    |      |      |
|---------------|----------|----|----|------|------|
| SW:VPP1_HUMAN | ATP6N1   | 36 | 3  | 0.90 | 0.19 |
| GP:Y18206_1   | PPP1R6   | 36 | 1  | 0.92 | 0.00 |
| GP:AB037819_1 | RRBP1    | 36 | 7  | 1.02 | 0.13 |
| GP:AF020797_1 | HSMU1B   | 36 | 1  | 1.03 | 0.00 |
| SW:MPRD_HUMAN | M6PR     | 36 | 1  | 1.03 | 0.00 |
| GP:AF077032_1 | FLJ10578 | 36 | 5  | 1.04 | 0.27 |
| SW:IMB2_HUMAN | KPNB2    | 36 | 1  | 1.06 | 0.00 |
| SW:SR19_HUMAN | SRP19    | 36 | 1  | 1.14 | 0.00 |
| GP:AF195951_1 | SRP68    | 36 | 2  | 1.17 | 0.00 |
| SW:SR09_HUMAN | SRP9     | 36 | 7  | 1.25 | 0.29 |
| GP:AF144700_1 | TIMM13A  | 36 | 5  | 1.31 | 0.20 |
| SW:ROM_HUMAN  | HNRPM    | 36 | 2  | 1.41 | 0.23 |
| SW:CAS_HUMAN  | CSE1L    | 36 | 3  | 1.46 | 0.18 |
| SW:PKBS_HUMAN | BZRP     | 36 | 2  | 1.57 | 0.04 |
| SW:PXF_HUMAN  | PXF      | 36 | 1  | 1.61 | 0.00 |
| GP:U64791_1   | GLG1     | 36 | 1  | 1.95 | 0.00 |
| GP:U28811_1   | CFR-1    | 36 | 14 | 1.97 | 0.53 |
| GP:AF150087_1 | TIMM8A   | 36 | 1  | 2.22 | 0.00 |

|                                     |       |    |    |      |      |
|-------------------------------------|-------|----|----|------|------|
| SW:SR14_HUMAN                       | SRP14 | 36 | 2  | 3.24 | 0.14 |
| <b>RNA Processing/Modifications</b> |       |    |    |      |      |
| SW:SYTC_HUMAN                       | TARS  | 37 | 4  | 0.51 | 0.06 |
| SW:SYG_HUMAN                        | GARS  | 37 | 1  | 0.69 | 0.00 |
| SW:SYD_HUMAN                        | DARS  | 37 | 4  | 0.77 | 0.15 |
| SW:SYA_HUMAN                        | AARS  | 37 | 1  | 0.83 | 0.00 |
| SW:SYR_HUMAN                        | RARS  | 37 | 7  | 0.84 | 0.08 |
| SW:SYM_HUMAN                        | MARS  | 37 | 9  | 0.87 | 0.18 |
| SW:SYEP_HUMAN                       | EPRS  | 37 | 23 | 0.92 | 0.84 |
| SW:CST1_HUMAN                       | CSTF1 | 37 | 1  | 0.93 | 0.00 |
| SW:SYQ_HUMAN                        | QARS  | 37 | 2  | 0.94 | 0.20 |
| SW:SYV_HUMAN                        | VARS2 | 37 | 4  | 0.95 | 0.14 |
| SW:SYK_HUMAN                        | KARS  | 37 | 7  | 1.01 | 0.18 |
| SW:SYI_HUMAN                        | IARS  | 37 | 9  | 1.10 | 0.16 |
| SW:NPM_HUMAN                        | NPM1  | 37 | 3  | 1.11 | 0.14 |
| SW:PCB1_HUMAN                       | PCBP1 | 37 | 20 | 1.23 | 0.19 |
| SWN:SYFB_HUMAN                      | FRSB  | 37 | 4  | 1.25 | 0.44 |
| GP:AB020880_1                       | SART3 | 37 | 5  | 1.37 | 0.17 |

|               |          |    |    |      |      |
|---------------|----------|----|----|------|------|
| SW:ROF_HUMAN  | HNRPF    | 37 | 3  | 1.37 | 0.10 |
| PIR2:T13159   | E1B-AP5  | 37 | 3  | 1.38 | 0.41 |
| SW:SYN_HUMAN  | NARS     | 37 | 4  | 1.42 | 0.19 |
| PIR2:T02673   | HNRPR    | 37 | 3  | 1.43 | 0.18 |
| GP:AF037448_1 | NSAP1    | 37 | 4  | 1.45 | 0.22 |
| SW:ROK_HUMAN  | HNRPK    | 37 | 6  | 1.51 | 0.30 |
| SW:FBRL_HUMAN | FBL      | 37 | 1  | 1.53 | 0.00 |
| SW:SMD3_HUMAN | SNRPD3   | 37 | 1  | 1.55 | 0.00 |
| SW:ROA0_HUMAN | HNRPA0   | 37 | 2  | 1.64 | 0.40 |
| SW:ROH1_HUMAN | HNRPH1   | 37 | 4  | 1.66 | 0.22 |
| SW:DDX1_HUMAN | DDX1     | 37 | 6  | 1.67 | 0.10 |
| PIR2:JW0079   | HNRPDL   | 37 | 1  | 1.72 | 0.00 |
| SW:PCB2_HUMAN | PCBP2    | 37 | 10 | 1.73 | 0.20 |
| GP:AC003972_1 | RENT1    | 37 | 1  | 1.74 | 0.00 |
| SW:RUXF_HUMAN | SNRPF    | 37 | 1  | 1.76 | 0.00 |
| GP:AF177344_1 | FLJ10581 | 37 | 1  | 1.89 | 0.00 |
| PIR2:I55595   | RNPC2    | 37 | 1  | 1.92 | 0.00 |
| SW:ROA3_HUMAN | FBRNP    | 37 | 2  | 1.93 | 0.06 |
| SW:SMD2_HUMAN | SNRPD2   | 37 | 2  | 2.02 | 0.82 |

|                     |          |    |    |      |      |
|---------------------|----------|----|----|------|------|
| SW:U2AF_HUMAN       | U2AF65   | 37 | 1  | 2.05 | 0.00 |
| GP:D21163_1         | U5-116KD | 37 | 1  | 2.11 | 0.00 |
| SW:RU17_HUMAN       | SNRP70   | 37 | 3  | 2.11 | 0.26 |
| PIR2:A54601         | HNRPD    | 37 | 9  | 2.17 | 0.65 |
| SW:NHPX_HUMAN       | NHP2L1   | 37 | 2  | 2.21 | 0.20 |
| SW:DDX5_HUMAN       | DDX5     | 37 | 1  | 2.27 | 0.00 |
| SW:U2AG_HUMAN       | U2AF35   | 37 | 2  | 2.34 | 0.02 |
| SW:ROU_HUMAN        | HNRPU    | 37 | 29 | 2.48 | 0.62 |
| SW:ROA1_HUMAN       | HNRPA1   | 37 | 11 | 2.48 | 0.85 |
| SW:DD17_HUMAN       | DDX17    | 37 | 1  | 2.58 | 0.00 |
| SW:Y017_HUMAN       | SF3B3    | 37 | 7  | 2.63 | 0.59 |
| SW:NR54_HUMAN       | NONO     | 37 | 2  | 3.38 | 1.09 |
| SW:SFR7_HUMAN       | SFRS7    | 37 | 2  | 3.66 | 0.49 |
| <b>RNA Splicing</b> |          |    |    |      |      |
| GP:AF037448_1       | NSAP1    | 38 | 4  | 1.45 | 0.22 |
| SW:SMD3_HUMAN       | SNRPD3   | 38 | 1  | 1.55 | 0.00 |
| SW:RUXF_HUMAN       | SNRPF    | 38 | 1  | 1.76 | 0.00 |

|                     |          |    |    |      |      |
|---------------------|----------|----|----|------|------|
| PIR2:T09073         | SFRS2IP  | 38 | 1  | 1.89 | 0.00 |
| PIR2:I55595         | RNPC2    | 38 | 1  | 1.92 | 0.00 |
| SW:SMD2_HUMAN       | SNRPD2   | 38 | 2  | 2.02 | 0.82 |
| SW:U2AF_HUMAN       | U2AF65   | 38 | 1  | 2.05 | 0.00 |
| GP:D21163_1         | U5-116KD | 38 | 1  | 2.11 | 0.00 |
| SW:RU17_HUMAN       | SNRP70   | 38 | 3  | 2.11 | 0.26 |
| SW:U2AG_HUMAN       | U2AF35   | 38 | 2  | 2.34 | 0.02 |
| SW:ROA1_HUMAN       | HNRPA1   | 38 | 11 | 2.48 | 0.85 |
| SW:Y017_HUMAN       | SF3B3    | 38 | 7  | 2.63 | 0.59 |
| SW:NR54_HUMAN       | NONO     | 38 | 2  | 3.38 | 1.09 |
| SW:SFR7_HUMAN       | SFRS7    | 38 | 2  | 3.66 | 0.49 |
| <b>RNA Turnover</b> |          |    |    |      |      |
| SW:HS71_HUMAN       | HSPA1A   | 39 | 6  | 0.62 | 0.14 |
| SW:RINI_HUMAN       | RNH      | 39 | 1  | 1.01 | 0.00 |
| GP:AF132941_1       | LOC51068 | 39 | 1  | 1.02 | 0.00 |
| PIR2:A57017         | ABCE1    | 39 | 5  | 1.03 | 0.03 |
| SW:PAB1_HUMAN       | PABPC1   | 39 | 13 | 1.22 | 0.44 |
| GP:U85625_1         | RNASE6PL | 39 | 3  | 1.44 | 0.04 |

|                            |         |    |    |      |      |
|----------------------------|---------|----|----|------|------|
| GP:AC003972_1              | RENT1   | 39 | 1  | 1.74 | 0.00 |
| PIR2:S78046                | RNASE6  | 39 | 3  | 1.94 | 0.00 |
| PIR2:A54601                | HNRPD   | 39 | 9  | 2.17 | 0.65 |
| <b>Recombination</b>       |         |    |    |      |      |
| SW:IMA1_HUMAN              | KPNA1   | 40 | 1  | 0.33 | 0.00 |
| SW:FRAP_HUMAN              | FRAP1   | 40 | 1  | 1.13 | 0.00 |
| PIR2:JE0334                | RUVBL1  | 40 | 3  | 1.16 | 0.14 |
| SW:HMG1_HUMAN              | HMG1    | 40 | 3  | 1.33 | 0.21 |
| SW:KU86_HUMAN              | XRCC5   | 40 | 6  | 1.46 | 0.36 |
| SW:RFA3_HUMAN              | RPA3    | 40 | 2  | 1.61 | 0.19 |
| PIR2:A57099                | PRKDC   | 40 | 13 | 1.74 | 0.27 |
| SW:RFA1_HUMAN              | RPA1    | 40 | 1  | 2.30 | 0.00 |
| <b>Signal Transduction</b> |         |    |    |      |      |
| GP:AF029684_1              | IKKB    | 41 | 1  | 0.19 | 0.00 |
| GP:U35146_1                | KKIAMRE | 41 | 2  | 0.26 | 0.06 |
| SW:FKBP5_HUMAN             | FKBP5   | 41 | 1  | 0.28 | 0.00 |
| SW:143E_HUMAN              | YWHAE   | 41 | 1  | 0.31 | 0.00 |

|                |         |    |    |      |      |
|----------------|---------|----|----|------|------|
| SW:RIN1_HUMAN  | RIN1    | 41 | 1  | 0.31 | 0.00 |
| SW:TNRC_HUMAN  | LTBR    | 41 | 1  | 0.32 | 0.00 |
| SWN:AKT3_HUMAN | AKT3    | 41 | 1  | 0.33 | 0.00 |
| SW:RRAS_HUMAN  | RRAS    | 41 | 3  | 0.35 | 0.01 |
| SW:ATS1_HUMAN  | ADAMTS1 | 41 | 5  | 0.47 | 0.18 |
| SW:AAK1_HUMAN  | PRKAA1  | 41 | 2  | 0.47 | 0.00 |
| GP:AF061258_1  | LIM     | 41 | 1  | 0.50 | 0.00 |
| PIR2:JC4775    | DNAJC3  | 41 | 2  | 0.51 | 0.27 |
| SW:COF1_HUMAN  | CFL1    | 41 | 14 | 0.55 | 0.21 |
| GP:AF100757_1  | COPS4   | 41 | 2  | 0.56 | 0.00 |
| PIR2:T13151    | CD2AP   | 41 | 3  | 0.58 | 0.01 |
| GP:AF024636_1  | STK24   | 41 | 1  | 0.59 | 0.00 |
| SW:RAPB_HUMAN  | RAP1B   | 41 | 2  | 0.59 | 0.04 |
| SW:MOES_HUMAN  | MSN     | 41 | 1  | 0.59 | 0.00 |
| SW:CAP1_HUMAN  | CAP     | 41 | 1  | 0.60 | 0.00 |
| GP:AF001628_1  | AbiBP4  | 41 | 2  | 0.62 | 0.01 |



|               |           |    |    |      |      |
|---------------|-----------|----|----|------|------|
| SW:EGFR_HUMAN | EGFR      | 41 | 2  | 0.62 | 0.00 |
| GP:AB014718_1 | TNFRSF10B | 41 | 2  | 0.64 | 0.10 |
| SW:TDXN_HUMAN | PRDX4     | 41 | 5  | 0.66 | 0.19 |
| SW:RAC3_HUMAN | RAC3      | 41 | 2  | 0.69 | 0.00 |
| SW:RHOB_HUMAN | ARHB      | 41 | 6  | 0.70 | 0.04 |
| GP:AF091035_1 | RAB21     | 41 | 2  | 0.71 | 0.00 |
| SW:CTN1_HUMAN | CTNNA1    | 41 | 27 | 0.71 | 0.19 |
| GP:AB018358_1 | KIAA0905  | 41 | 3  | 0.72 | 0.10 |
| SW:RGP1_HUMAN | RANGAP1   | 41 | 1  | 0.72 | 0.00 |
| SW:KCCB_HUMAN | CAMK2B    | 41 | 2  | 0.74 | 0.09 |
| SW:ITAV_HUMAN | ITGAV     | 41 | 1  | 0.75 | 0.00 |
| SW:IQGA_HUMAN | IQGAP1    | 41 | 4  | 0.77 | 0.09 |
| SW:GBAK_HUMAN | GNAI3     | 41 | 4  | 0.77 | 0.10 |
| SW:P2AA_HUMAN | PPP2CA    | 41 | 7  | 0.78 | 0.11 |
| SW:FKB1_HUMAN | FKBP1A    | 41 | 2  | 0.78 | 0.00 |
| SW:CTNB_HUMAN | CTNNB1    | 41 | 19 | 0.79 | 0.26 |
| SW:Y253_HUMAN | NCSTN     | 41 | 2  | 0.81 | 0.05 |

|               |            |    |    |      |      |
|---------------|------------|----|----|------|------|
| GP:U70735_1   | MOV34-34KD | 41 | 1  | 0.82 | 0.00 |
| SW:BASI_HUMAN | BSG        | 41 | 2  | 0.82 | 0.00 |
| SW:SRC_HUMAN  | SRC        | 41 | 1  | 0.83 | 0.00 |
| SW:ITA6_HUMAN | ITGA6      | 41 | 3  | 0.83 | 0.04 |
| SW:ABP2_HUMAN | FLNA       | 41 | 11 | 0.85 | 0.11 |
| SWN:P23_HUMAN | p23        | 41 | 2  | 0.85 | 0.01 |
| SW:KPC1_HUMAN | PRKCB1     | 41 | 1  | 0.85 | 0.00 |
| SW:GPS1_HUMAN | GPS1       | 41 | 4  | 0.86 | 0.12 |
| SW:MPRI_HUMAN | IGF2R      | 41 | 76 | 0.86 | 0.21 |
| GP:AF124145_1 | AMFR       | 41 | 1  | 0.87 | 0.00 |
| GP:AF087020_1 | PZR        | 41 | 12 | 0.88 | 0.08 |
| GP:AB002382_1 | CTNND1     | 41 | 18 | 0.88 | 0.31 |
| PIR2:B55053   | SCYE1      | 41 | 9  | 0.88 | 0.07 |
| SW:RHOG_HUMAN | ARHG       | 41 | 5  | 0.90 | 0.29 |
| SW:G25B_HUMAN | CDC42      | 41 | 13 | 0.90 | 0.13 |
| SW:ITA5_HUMAN | ITGA5      | 41 | 2  | 0.91 | 0.03 |

|                |          |    |    |      |      |
|----------------|----------|----|----|------|------|
| GP:AB006534_1  | SPINT2   | 41 | 1  | 0.91 | 0.00 |
| SW:143T_HUMAN  | YWHAQ    | 41 | 3  | 0.91 | 0.05 |
| GP:AC002306_1  | EDG4     | 41 | 1  | 0.92 | 0.00 |
| SW:GBB2_HUMAN  | GNB2     | 41 | 23 | 0.92 | 0.22 |
| GP:AF151793_1  | AIP1     | 41 | 8  | 0.92 | 0.09 |
| GPN:AB025194_1 | HD-PTP   | 41 | 1  | 0.93 | 0.00 |
| GP:D87930_1    | PPP1R12A | 41 | 3  | 0.95 | 0.13 |
| PIR2:T46270    | FLNB     | 41 | 12 | 0.95 | 0.39 |
| SW:RHOA_HUMAN  | ARHA     | 41 | 37 | 0.95 | 0.25 |
| SW:APP2_HUMAN  | APLP2    | 41 | 2  | 0.95 | 0.08 |
| PIR2:I38176    | RAGA     | 41 | 1  | 0.96 | 0.00 |
| GP:AF092130_1  | MADHIP   | 41 | 1  | 0.97 | 0.00 |
| PIR2:S29815    | P2RY4    | 41 | 1  | 0.97 | 0.00 |
| SW:MK01_HUMAN  | MAPK1    | 41 | 1  | 0.97 | 0.00 |
| SW:PRO1_HUMAN  | PFN1     | 41 | 4  | 0.97 | 0.39 |
| SW:LYN_HUMAN   | LYN      | 41 | 2  | 0.98 | 0.02 |
| SW:RAPA_HUMAN  | RAP1A    | 41 | 1  | 0.98 | 0.00 |

|                |               |    |    |      |      |
|----------------|---------------|----|----|------|------|
| SW:RAN_HUMAN   | RAN           | 41 | 3  | 0.98 | 0.04 |
| SW:EFA5_HUMAN  | EFNA5         | 41 | 1  | 0.99 | 0.00 |
| SW:CD59_HUMAN  | CD59          | 41 | 8  | 1.00 | 0.26 |
| SW:SRD6_HUMAN  | PGRMC2        | 41 | 1  | 1.01 | 0.00 |
| GP:U41806_1    | SQSTM1        | 41 | 4  | 1.01 | 0.21 |
| SW:KAP2_HUMAN  | PRKAR2A       | 41 | 2  | 1.04 | 0.57 |
| SW:KCCD_HUMAN  | CAMK2D        | 41 | 3  | 1.04 | 0.01 |
| SW:KRCB_HUMAN  | AKT2          | 41 | 1  | 1.04 | 0.00 |
| SW:PTN1_HUMAN  | PTPN1         | 41 | 3  | 1.05 | 0.15 |
| SW:FASA_HUMAN  | TNFSF6        | 41 | 1  | 1.06 | 0.00 |
| SW:FK38_HUMAN  | FKBP8         | 41 | 3  | 1.06 | 0.31 |
| GP:AF260566_1  | HGS           | 41 | 1  | 1.06 | 0.00 |
| SW:ERBB2_HUMAN | ERBB2         | 41 | 5  | 1.07 | 0.09 |
| SW:RAC1_HUMAN  | RAC1          | 41 | 18 | 1.08 | 0.53 |
| PIR2:T47172    | CORO1C or CRN | 41 | 5  | 1.08 | 0.38 |
| GP:AK022871_1  | TOLLIP        | 41 | 4  | 1.09 | 0.03 |

|                |         |    |    |      |      |
|----------------|---------|----|----|------|------|
| SW:A4_HUMAN    | APP     | 41 | 5  | 1.09 | 0.19 |
| PIR1:JC5394    | DJ-1    | 41 | 7  | 1.10 | 0.32 |
| GP:AB011126_1  | FBP17   | 41 | 1  | 1.11 | 0.00 |
| SW:143Z_HUMAN  | YWHAZ   | 41 | 4  | 1.12 | 0.63 |
| GP:AL096767_2  | SBF1    | 41 | 1  | 1.15 | 0.00 |
| SW:NTC1_HUMAN  | NOTCH1  | 41 | 1  | 1.15 | 0.00 |
| SW:GBI2_HUMAN  | GNAI2   | 41 | 1  | 1.18 | 0.00 |
| SW:EPA7_HUMAN  | EPHA7   | 41 | 2  | 1.19 | 0.14 |
| GP:AB002313_1  | PLXNB   | 41 | 12 | 1.20 | 0.40 |
| SW:ER60_HUMAN  | ERP60   | 41 | 17 | 1.21 | 0.54 |
| SW:INSR_HUMAN  | INSR    | 41 | 2  | 1.22 | 0.02 |
| SW:PI52_HUMAN  | PIP5K2A | 41 | 1  | 1.24 | 0.00 |
| GPN:AF279372_1 | ITPK1   | 41 | 3  | 1.25 | 0.11 |
| SW:TRA2_HUMAN  | TRAF2   | 41 | 2  | 1.25 | 0.26 |
| SW:GBB1_HUMAN  | GNB1    | 41 | 27 | 1.27 | 0.26 |
| SW:KAPA_HUMAN  | PRKACA  | 41 | 2  | 1.28 | 0.55 |
| GP:AF020202_1  | UNC13   | 41 | 3  | 1.29 | 0.09 |

|               |        |    |    |      |      |
|---------------|--------|----|----|------|------|
| SW:BCR_HUMAN  | BCR    | 41 | 1  | 1.29 | 0.00 |
| GP:AB037857_1 | PTGFRN | 41 | 10 | 1.30 | 0.21 |
| SW:P2BA_HUMAN | PPP3CA | 41 | 3  | 1.30 | 0.16 |
| PIR2:JC5938   | TxnI   | 41 | 2  | 1.31 | 0.01 |
| SW:OGT1_HUMAN | OGT    | 41 | 1  | 1.34 | 0.00 |
| GP:AK001521_1 | DIP13B | 41 | 4  | 1.35 | 0.12 |
| SW:KG3B_HUMAN | GSK3B  | 41 | 1  | 1.36 | 0.00 |
| GP:D87116_1   | MAP2K3 | 41 | 3  | 1.38 | 0.17 |
| SW:EBI2_HUMAN | EBI2   | 41 | 1  | 1.40 | 0.00 |
| SW:THIO_HUMAN | TXN    | 41 | 1  | 1.41 | 0.00 |
| SW:OCRL_HUMAN | OCRL   | 41 | 2  | 1.42 | 1.00 |
| PIR2:I38026   | TRAF4  | 41 | 2  | 1.43 | 0.18 |
| SW:GBLP_HUMAN | GNB2L1 | 41 | 13 | 1.44 | 0.51 |
| GP:AB033078_1 | SGPL1  | 41 | 2  | 1.44 | 0.06 |
| SW:RSP4_HUMAN | LAMR1  | 41 | 7  | 1.44 | 0.05 |
| SW:OBRG_HUMAN | LEPR   | 41 | 1  | 1.46 | 0.00 |
| SW:PTPF_HUMAN | LAR    | 41 | 5  | 1.50 | 0.35 |
| SW:GBI1_HUMAN | GNAI1  | 41 | 4  | 1.56 | 0.16 |

|               |           |    |    |      |      |
|---------------|-----------|----|----|------|------|
| SW:C166_HUMAN | ALCAM     | 41 | 8  | 1.58 | 0.27 |
| SW:PTK7_HUMAN | PTK7      | 41 | 9  | 1.66 | 0.30 |
| GP:U17032_1   | ARHGAP5   | 41 | 1  | 1.66 | 0.00 |
| SW:CAN1_HUMAN | CAPN1     | 41 | 1  | 1.73 | 0.00 |
| SW:ITB1_HUMAN | ITGB1     | 41 | 5  | 1.94 | 0.58 |
| GP:AB007867_1 | PLXNB1    | 41 | 1  | 1.97 | 0.00 |
| GP:AL023805_1 | PLCB4     | 41 | 6  | 2.00 | 0.24 |
| GP:AF043250_1 | PLRG1     | 41 | 1  | 2.05 | 0.00 |
| SW:KC2B_HUMAN | CSNK2B    | 41 | 2  | 2.11 | 0.18 |
| SW:NRP_HUMAN  | NRP1      | 41 | 8  | 2.20 | 1.33 |
| GP:X92689_1   | GALNAC-T3 | 41 | 3  | 2.26 | 0.17 |
| SW:GST3_HUMAN | MGST3     | 41 | 2  | 2.31 | 0.83 |
| SW:POR1_HUMAN | VDAC1     | 41 | 28 | 2.36 | 0.34 |
| SW:MAZ_HUMAN  | MAZ       | 41 | 1  | 2.37 | 0.00 |
| SW:IBP2_HUMAN | IGFBP2    | 41 | 6  | 2.43 | 0.38 |
| SW:GRBA_HUMAN | GRB10     | 41 | 3  | 2.55 | 2.22 |

|                                 |          |    |   |       |      |
|---------------------------------|----------|----|---|-------|------|
| SW:SORC_HUMAN                   | SRI      | 41 | 2 | 2.86  | 2.11 |
| SW:LU_HUMAN                     | LU       | 41 | 3 | 2.88  | 0.14 |
| GP:D63481_1                     | SCRIB    | 41 | 1 | 3.09  | 0.00 |
| GP:AB006537_1                   | IL1RAP   | 41 | 1 | 3.20  | 0.00 |
| GP:AF002668_1                   | DEGS     | 41 | 1 | 3.29  | 0.00 |
| SW:RDC1_HUMAN                   | RDC1     | 41 | 4 | 3.86  | 1.24 |
| SW:PA2M_HUMAN                   | PLA2G2A  | 41 | 3 | 3.94  | 1.93 |
| SW:KDGG_HUMAN                   | DGKG     | 41 | 1 | 10.54 | 0.00 |
| <b>Small Molecule Transport</b> |          |    |   |       |      |
| SW:TRFL_HUMAN                   | LTF      | 42 | 2 | 0.28  | 0.03 |
| SW:FLOH_HUMAN                   | SLC19A2  | 42 | 3 | 0.41  | 0.05 |
| SW:Y274_HUMAN                   | SAC3     | 42 | 1 | 0.45  | 0.00 |
| GP:AF015926_1                   | SLC9A3R1 | 42 | 1 | 0.47  | 0.00 |
| SW:AAAT_HUMAN                   | SLC1A5   | 42 | 4 | 0.52  | 0.12 |
| SW:ATND_HUMAN                   | ATP1B3   | 42 | 3 | 0.57  | 0.07 |
| SW:MRP1_HUMAN                   | ABCC1    | 42 | 4 | 0.58  | 0.08 |
| SW:NC5R_HUMAN                   | DIA1     | 42 | 2 | 0.60  | 0.02 |
| SW:MRP4_HUMAN                   | MRP4     | 42 | 2 | 0.61  | 0.03 |



|                |          |    |   |      |      |
|----------------|----------|----|---|------|------|
| SW:CL11_HUMAN  | CLIC1    | 42 | 1 | 0.76 | 0.00 |
| SW:GBAK_HUMAN  | GNAI3    | 42 | 4 | 0.77 | 0.10 |
| SW:ATHA_HUMAN  | ATP4A    | 42 | 2 | 0.79 | 0.08 |
| SWN:ENT1_HUMAN | ENT1     | 42 | 1 | 0.83 | 0.00 |
| SW:ANX7_HUMAN  | ANXA7    | 42 | 4 | 0.87 | 0.02 |
| PIR2:T46412    | NEDD4    | 42 | 1 | 0.88 | 0.00 |
| SW:VATX_HUMAN  | ATP6D    | 42 | 2 | 0.89 | 0.03 |
| SW:VPP1_HUMAN  | ATP6N1   | 42 | 3 | 0.90 | 0.19 |
| GP:AF284422_1  | LOC56996 | 42 | 1 | 0.92 | 0.00 |
| SW:MOT4_HUMAN  | SLC16A3  | 42 | 1 | 0.92 | 0.00 |
| SWN:STX8_HUMAN | STX8     | 42 | 1 | 0.93 | 0.00 |
| GP:AK022853_1  | NTT73    | 42 | 1 | 0.94 | 0.00 |
| SW:ICLN_HUMAN  | CLNS1A   | 42 | 1 | 0.96 | 0.00 |
| SW:MK01_HUMAN  | MAPK1    | 42 | 1 | 0.97 | 0.00 |
| SW:IEFS_HUMAN  | STIP1    | 42 | 5 | 1.01 | 0.17 |
| GP:AJ131612_1  | Slc25a10 | 42 | 1 | 1.02 | 0.00 |
| GP:AF288687_1  | CGI-152  | 42 | 3 | 1.03 | 0.07 |

|               |         |    |    |      |      |
|---------------|---------|----|----|------|------|
| SW:CLC3_HUMAN | CLCN3   | 42 | 1  | 1.03 | 0.00 |
| SW:ATN1_HUMAN | ATP1A1  | 42 | 54 | 1.04 | 0.22 |
| GP:U81006_1   | TM9SF2  | 42 | 3  | 1.05 | 0.06 |
| SW:CPT2_HUMAN | CPT2    | 42 | 1  | 1.08 | 0.00 |
| SW:ATCS_HUMAN | ATP2B4  | 42 | 6  | 1.10 | 0.21 |
| SW:HBP_HUMAN  | HDLBP   | 42 | 3  | 1.11 | 0.27 |
| SW:ATHL_HUMAN | ATP12A  | 42 | 7  | 1.12 | 0.11 |
| SW:NPC1_HUMAN | NPC1    | 42 | 1  | 1.16 | 0.00 |
| SW:COXS_HUMAN | COX17   | 42 | 1  | 1.18 | 0.00 |
| SW:VAB1_HUMAN | ATP6B1  | 42 | 2  | 1.20 | 0.08 |
| SW:TRSR_HUMAN | TFRC    | 42 | 2  | 1.20 | 0.12 |
| SW:ATC2_HUMAN | ATP2B2  | 42 | 9  | 1.28 | 0.35 |
| SW:SAP_HUMAN  | PSAP    | 42 | 14 | 1.31 | 0.91 |
| GP:AF149418_1 | SLC4A4  | 42 | 1  | 1.45 | 0.00 |
| SW:TXTP_HUMAN | SLC25A1 | 42 | 2  | 1.45 | 0.00 |
| SW:ATNB_HUMAN | ATP1B1  | 42 | 23 | 1.46 | 0.36 |

|                |          |    |    |      |      |
|----------------|----------|----|----|------|------|
| SW:VAB2_HUMAN  | ATP6B2   | 42 | 7  | 1.47 | 0.34 |
| SW:NLTP_HUMAN  | SCP2     | 42 | 2  | 1.50 | 0.06 |
| SW:ATCP_HUMAN  | ATP2B1   | 42 | 21 | 1.73 | 0.61 |
| SW:ADT1_HUMAN  | SLC25A4  | 42 | 2  | 1.84 | 0.94 |
| SW:ECHB_HUMAN  | HADHB    | 42 | 4  | 1.87 | 0.07 |
| SW:ECHA_HUMAN  | HADHA    | 42 | 13 | 1.97 | 0.65 |
| SW:POR2_HUMAN  | VDAC2    | 42 | 34 | 1.99 | 0.32 |
| PIR2:B53737    | SLC25A3  | 42 | 21 | 2.02 | 0.42 |
| SW:ATPG_HUMAN  | ATP5C1   | 42 | 3  | 2.15 | 0.32 |
| GP:AC002540_1  | SLC25A13 | 42 | 1  | 2.16 | 0.00 |
| SW:POR1_HUMAN  | VDAC1    | 42 | 28 | 2.36 | 0.34 |
| SW:ATPA_HUMAN  | ATP5A1   | 42 | 8  | 2.38 | 0.42 |
| SWN:POR3_HUMAN | VDAC3    | 42 | 6  | 2.48 | 0.55 |
| SW:ADT2_HUMAN  | SLC25A5  | 42 | 8  | 2.53 | 1.17 |
| SW:ADT3_HUMAN  | SLC25A6  | 42 | 1  | 2.57 | 0.00 |
| SW:ATCK_HUMAN  | ATP2C1   | 42 | 2  | 2.59 | 0.30 |
| SW:SORC_HUMAN  | SRI      | 42 | 2  | 2.86 | 2.11 |

|                            |          |    |    |      |      |
|----------------------------|----------|----|----|------|------|
| SW:B3A2_HUMAN              | SLC4A2   | 42 | 1  | 3.57 | 0.00 |
| SW:AT2A_HUMAN              | ATP9A    | 42 | 2  | 5.29 | 2.51 |
| <b>Vesicular Transport</b> |          |    |    |      |      |
| SW:SNAG_HUMAN              | NAPG     | 43 | 2  | 0.43 | 0.31 |
| GP:AB018298_1              | SEC24D   | 43 | 1  | 0.47 | 0.00 |
| SW:RB3B_HUMAN              | RAB3B    | 43 | 2  | 0.50 | 0.00 |
| SW:ADG_HUMAN               | ADTG     | 43 | 4  | 0.51 | 0.13 |
| SW:LDLR_HUMAN              | LDLR     | 43 | 3  | 0.55 | 0.04 |
| SW:RB4A_HUMAN              | RAB4A    | 43 | 1  | 0.56 | 0.00 |
| PIR2:A53016                | MYO5A    | 43 | 1  | 0.58 | 0.00 |
| SW:EGFR_HUMAN              | EGFR     | 43 | 2  | 0.62 | 0.00 |
| SW:STB3_HUMAN              | STXBP3   | 43 | 6  | 0.66 | 0.15 |
| SW:CLH2_HUMAN              | CLTCL1   | 43 | 10 | 0.66 | 0.15 |
| SW:S23B_HUMAN              | SEC23B   | 43 | 1  | 0.69 | 0.00 |
| GP:AF038535_1              | SYT7     | 43 | 1  | 0.70 | 0.00 |
| SW:KINH_HUMAN              | KIF5B    | 43 | 2  | 0.73 | 0.05 |
| SW:RB35_HUMAN              | RAB35    | 43 | 1  | 0.73 | 0.00 |
| GPN:AB047846_1             | LOC51137 | 43 | 7  | 0.74 | 0.24 |
| SW:SN23_HUMAN              | SNAP23   | 43 | 2  | 0.74 | 0.06 |
| SW:RB3D_HUMAN              | RAB3D    | 43 | 1  | 0.74 | 0.00 |

|               |         |    |    |      |      |
|---------------|---------|----|----|------|------|
| SW:RAB2_HUMAN | RAB2    | 43 | 5  | 0.77 | 0.05 |
| SW:GBAK_HUMAN | GNAI3   | 43 | 4  | 0.77 | 0.10 |
| GP:AF091079_1 | YKT6    | 43 | 1  | 0.78 | 0.00 |
| SW:CLH1_HUMAN | CLTC    | 43 | 49 | 0.78 | 0.44 |
| GP:AJ131245_1 | SEC24B  | 43 | 1  | 0.81 | 0.00 |
| SW:DYN2_HUMAN | DNM2    | 43 | 1  | 0.81 | 0.00 |
| GP:D31886_1   | RAB3GAP | 43 | 3  | 0.83 | 0.11 |
| SW:CALX_HUMAN | CANX    | 43 | 4  | 0.84 | 0.04 |
| SW:ER53_HUMAN | LMAN1   | 43 | 2  | 0.84 | 0.00 |
| GP:U45976_1   | PICALM  | 43 | 1  | 0.85 | 0.00 |
| SW:ADB_HUMAN  | AP2B1   | 43 | 5  | 0.86 | 0.14 |
| SW:MPRI_HUMAN | IGF2R   | 43 | 76 | 0.86 | 0.21 |
| GP:AF044670_1 | VAP33   | 43 | 2  | 0.88 | 0.24 |
| GP:AF128536_1 | PACSIN2 | 43 | 4  | 0.89 | 0.45 |
| GP:AF004563_1 | STXBP1  | 43 | 4  | 0.89 | 0.26 |
| SW:G25B_HUMAN | CDC42   | 43 | 13 | 0.90 | 0.13 |
| SW:143T_HUMAN | YWHAQ   | 43 | 3  | 0.91 | 0.05 |

|                |          |    |    |      |      |
|----------------|----------|----|----|------|------|
| SW:ACTZ_HUMAN  | ACTR1A   | 43 | 7  | 0.92 | 0.04 |
| SWN:STX8_HUMAN | STX8     | 43 | 1  | 0.93 | 0.00 |
| GP:AC005545_2  | AP3D1    | 43 | 2  | 0.93 | 0.18 |
| SW:S23A_HUMAN  | SEC23A   | 43 | 5  | 0.94 | 0.18 |
| SW:ADB1_HUMAN  | AP1B1    | 43 | 20 | 0.99 | 0.27 |
| SW:TERA_HUMAN  | VCP      | 43 | 41 | 0.99 | 0.20 |
| GP:AC006942_1  | ADTAA    | 43 | 5  | 1.00 | 0.28 |
| GP:AF020797_1  | HSMU1B   | 43 | 1  | 1.03 | 0.00 |
| SW:MPRD_HUMAN  | M6PR     | 43 | 1  | 1.03 | 0.00 |
| GP:AC006378_1  | BET1     | 43 | 1  | 1.04 | 0.00 |
| PIR2:I53171    | H-SP1    | 43 | 1  | 1.06 | 0.00 |
| GP:AF260566_1  | HGS      | 43 | 1  | 1.06 | 0.00 |
| SW:COPB_HUMAN  | COPB     | 43 | 1  | 1.07 | 0.00 |
| SWN:SNX3_HUMAN | SNX3     | 43 | 1  | 1.07 | 0.00 |
| SW:ARF6_HUMAN  | ARF6     | 43 | 2  | 1.07 | 0.05 |
| GP:AF151858_1  | LOC50999 | 43 | 2  | 1.09 | 0.01 |
| GP:AF032922_1  | UNC-18C  | 43 | 2  | 1.09 | 0.03 |
| SW:STB2_HUMAN  | STXBP2   | 43 | 4  | 1.09 | 0.34 |
| SW:AP50_HUMAN  | AP2M1    | 43 | 3  | 1.10 | 0.08 |
| SW:NSF_HUMAN   | NSF      | 43 | 6  | 1.12 | 0.16 |

|                         |         |    |    |      |      |
|-------------------------|---------|----|----|------|------|
| GPN:AB047847_1          | COPG2   | 43 | 5  | 1.14 | 0.06 |
| SW:COPP_HUMAN           | COPB2   | 43 | 5  | 1.15 | 0.22 |
| SW:RAB7_HUMAN           | RAB7    | 43 | 1  | 1.16 | 0.00 |
| GP:AB019435_1           | P125    | 43 | 3  | 1.17 | 0.10 |
| GP:U85946_1             | SEC10L1 | 43 | 5  | 1.33 | 0.11 |
| GPN:AF191298_1          | VPS35   | 43 | 7  | 1.35 | 0.49 |
| PIR2:S33377             | CKAP4   | 43 | 5  | 1.35 | 0.22 |
| SW:TM21_HUMAN           | TMP21   | 43 | 3  | 1.37 | 0.60 |
| SWN:CNE3_HUMAN          | CPN3    | 43 | 28 | 1.47 | 0.27 |
| SW:RB13_HUMAN           | RAB13   | 43 | 1  | 1.49 | 0.00 |
| SW:GDIB_HUMAN           | GDI2    | 43 | 2  | 1.70 | 0.01 |
| PIR2:I53799             | KTN1    | 43 | 2  | 1.73 | 0.08 |
| PIR2:A55575             | ANK3    | 43 | 9  | 1.85 | 0.18 |
| SW:COPA_HUMAN           | COPA    | 43 | 15 | 1.95 | 3.01 |
| <b>Virulence</b>        |         |    |    |      |      |
| SW:PRS7_HUMAN           | PSMC2   | 44 | 7  | 0.75 | 0.17 |
| SW:VE1_HP14             | E1      | 44 | 1  | 0.98 | 0.00 |
| SW:EBI2_HUMAN           | EBI2    | 44 | 1  | 1.40 | 0.00 |
| SW:MCP_HUMAN            | MCP     | 44 | 3  | 1.42 | 0.95 |
| <b>Unknown Function</b> |         |    |    |      |      |

|                |          |    |    |      |      |
|----------------|----------|----|----|------|------|
| SW:TMS2_HUMAN  | TMPRSS2  | 45 | 10 | 0.12 | 0.05 |
| GP:AC005278_12 | F15K9.12 | 45 | 1  | 0.17 | 0.00 |
| GP:AK000542_1  | FLJ20535 | 45 | 1  | 0.20 | 0.00 |
| SW:CD9_HUMAN   | CD9      | 45 | 2  | 0.20 | 0.00 |
| SW:PROS_HUMAN  | KLK3     | 45 | 17 | 0.25 | 0.13 |
| PIR2:T34532    | MICAL    | 45 | 1  | 0.27 | 0.00 |
| GP:AB037745_1  | KIAA1324 | 45 | 1  | 0.28 | 0.00 |
| GPN:AL136939_1 | ELOVL2   | 45 | 1  | 0.28 | 0.00 |
| SW:DIMH_HUMAN  | DHCR24   | 45 | 2  | 0.28 | 0.00 |
| GP:AK022527_1  | FLJ12465 | 45 | 2  | 0.30 | 0.05 |
| GP:AK025588_1  | EPS8R2   | 45 | 3  | 0.33 | 0.04 |
| GP:AJ245222_1  | IGHV3-7  | 45 | 1  | 0.34 | 0.00 |
| GP:AK026904_1  | FLJ23251 | 45 | 2  | 0.35 | 0.01 |
| GP:AJ239387_1  | IGHV     | 45 | 1  | 0.37 | 0.00 |
| GP:AB020706_1  | AP2A2    | 45 | 1  | 0.38 | 0.00 |
| GP:AC011001_19 | unknown  | 45 | 1  | 0.41 | 0.00 |
| GP:AB040955_1  | KIAA1522 | 45 | 1  | 0.43 | 0.00 |
| PIR2:S71949    | ADAM12   | 45 | 4  | 0.43 | 0.01 |
| GP:U85992_1    | unknown  | 45 | 1  | 0.45 | 0.00 |



|                |          |    |   |      |      |
|----------------|----------|----|---|------|------|
| PIR2:T17320    | unknown  | 45 | 2 | 0.46 | 0.04 |
| PIR2:A49674    | FLII     | 45 | 2 | 0.47 | 0.04 |
| SW:CRP2_HUMAN  | CRIP2    | 45 | 1 | 0.48 | 0.00 |
| PIR2:T00261    | KIAA0603 | 45 | 2 | 0.48 | 0.01 |
| SW:B2MG_HUMAN  | B2M      | 45 | 6 | 0.48 | 0.08 |
| SW:ANX4_HUMAN  | ANXA4    | 45 | 7 | 0.51 | 0.06 |
| GPN:AF060225_1 | KIAA1607 | 45 | 2 | 0.54 | 0.04 |
| GPN:AF217190_1 | DDX36    | 45 | 2 | 0.56 | 0.00 |
| SW:PLSL_HUMAN  | LCP1     | 45 | 2 | 0.56 | 0.05 |
| GP:AF112227_1  | TDE1     | 45 | 1 | 0.57 | 0.00 |
| GP:AB029025_1  | KIAA1102 | 45 | 3 | 0.57 | 0.05 |
| GP:AB033001_1  | FLJ10209 | 45 | 2 | 0.57 | 0.10 |
| GP:AK024639_1  | FLJ20986 | 45 | 1 | 0.58 | 0.00 |
| PIR2:JE0350    | AGR2     | 45 | 1 | 0.58 | 0.00 |
| SW:ARGR_HUMAN  | ARMET    | 45 | 7 | 0.58 | 0.09 |
| GP:AF126181_1  | MAGED2   | 45 | 1 | 0.61 | 0.00 |
| GP:AC004839_2  | BAP29    | 45 | 3 | 0.61 | 0.01 |

|               |                     |    |   |      |      |
|---------------|---------------------|----|---|------|------|
| SW:XIP_HUMAN  | HBXIP               | 45 | 1 | 0.62 | 0.00 |
| SW:CYSR_HUMAN | CSRP1               | 45 | 5 | 0.62 | 0.05 |
| PIR2:T46901   | PTD004              | 45 | 4 | 0.62 | 0.09 |
| GP:AK026010_1 | FLJ22357            | 45 | 3 | 0.64 | 0.02 |
| PIR2:T08684   | KIAA1265            | 45 | 1 | 0.65 | 0.00 |
| SW:2AAA_HUMAN | PPP2R1A             | 45 | 1 | 0.65 | 0.00 |
| SW:DYI2_HUMAN | DNCI2               | 45 | 3 | 0.65 | 0.01 |
| GP:D38549_1   | CYFIP1              | 45 | 2 | 0.66 | 0.11 |
| GP:AB002366_1 | KIAA0368            | 45 | 1 | 0.67 | 0.00 |
| SW:ZO1_HUMAN  | TJP1                | 45 | 1 | 0.67 | 0.00 |
| PIR2:T17218   | DKFZP434P1750       | 45 | 1 | 0.68 | 0.00 |
| SW:DYJ2_HUMAN | DNCLI2              | 45 | 4 | 0.68 | 0.10 |
| SW:9123_HUMAN | TCTE1L              | 45 | 3 | 0.69 | 0.07 |
| PIR2:T46394   | DKFZP434H0820       | 45 | 5 | 0.69 | 0.17 |
| GP:AB040884_1 | OSBPL8              | 45 | 1 | 0.70 | 0.00 |
| GP:U21252_1   | anti-colorectal car | 45 | 1 | 0.70 | 0.00 |
| GP:D87438_1   | KIAA0251            | 45 | 1 | 0.71 | 0.00 |
| GP:AB032997_1 | KIAA1171            | 45 | 3 | 0.71 | 0.13 |
| GP:AF144748_1 | ENTPD2              | 45 | 1 | 0.72 | 0.00 |
| GP:AK023914_1 | FLJ13852            | 45 | 2 | 0.72 | 0.00 |
| SW:AMP1_HUMAN | KIAA0094            | 45 | 1 | 0.72 | 0.00 |

|                |                    |    |    |      |      |
|----------------|--------------------|----|----|------|------|
| GP:AB020637_1  | KIAA0830           | 45 | 1  | 0.73 | 0.00 |
| GP:AB040887_1  | ZNF291             | 45 | 1  | 0.74 | 0.00 |
| PIR2:T46299    | TREX1              | 45 | 1  | 0.75 | 0.00 |
| GP:AB046798_1  | KIAA1578           | 45 | 1  | 0.76 | 0.00 |
| GP:AF155652_1  | PCMF               | 45 | 1  | 0.76 | 0.00 |
| GP:AF151840_1  | ARSDR1             | 45 | 26 | 0.76 | 0.45 |
| SWN:DB83_HUMAN | DB83               | 45 | 1  | 0.77 | 0.00 |
| PIR2:T13152    | WDR1               | 45 | 5  | 0.77 | 0.06 |
| SW:GC5L_HUMAN  | GCN5L1             | 45 | 1  | 0.78 | 0.00 |
| GP:AB011145_1  | ERp44              | 45 | 9  | 0.78 | 0.13 |
| SW:CC4H_HUMAN  | LRBA               | 45 | 1  | 0.79 | 0.00 |
| SW:LMO6_HUMAN  | LMO6               | 45 | 1  | 0.79 | 0.00 |
| GPN:AF239156_1 | PDF1A              | 45 | 1  | 0.79 | 0.00 |
| SW:G100_HUMAN  | ADRM1              | 45 | 4  | 0.79 | 0.06 |
| GPN:AB041832_1 | WBP11              | 45 | 1  | 0.80 | 0.00 |
| GP:AF151867_1  | INTEGRAL TYPE      | 45 | 2  | 0.80 | 0.07 |
| SW:ME18_HUMAN  | ZNF144             | 45 | 1  | 0.81 | 0.00 |
| GP:U06631_1    | H326               | 45 | 2  | 0.81 | 0.07 |
| GP:AC003956_1  | Acetolactate synth | 45 | 5  | 0.81 | 0.28 |
| SW:SC13_HUMAN  | SEC13L1            | 45 | 3  | 0.82 | 0.02 |
| PIR2:T46292    | BAG3               | 45 | 1  | 0.83 | 0.00 |
| GP:AF293335_1  | KIAA1967           | 45 | 2  | 0.83 | 0.01 |
| GP:AK000303_1  | FLJ20296           | 45 | 3  | 0.83 | 0.03 |
| GPN:AF193795_1 | VPS29              | 45 | 2  | 0.83 | 0.04 |
| GP:AF068297_1  | HDCMD45P           | 45 | 2  | 0.84 | 0.14 |
| GP:AB037807_1  | KIAA1386           | 45 | 1  | 0.85 | 0.00 |
| PIR2:T08753    | E46L               | 45 | 2  | 0.87 | 0.13 |

|                |          |    |    |      |      |
|----------------|----------|----|----|------|------|
| GP:AK022499_1  | FLJ00365 | 45 | 1  | 0.88 | 0.00 |
| SW:EF1D_HUMAN  | EEF1D    | 45 | 2  | 0.88 | 0.01 |
| GP:AB037856_1  | FENS-1   | 45 | 3  | 0.88 | 0.16 |
| GP:AF284574_1  | NIT2     | 45 | 1  | 0.89 | 0.00 |
| GP:AK022868_1  | FLJ12806 | 45 | 1  | 0.89 | 0.00 |
| PIR2:T46298    | FLJ14362 | 45 | 1  | 0.89 | 0.00 |
| SW:FA5_HUMAN   | F5       | 45 | 1  | 0.89 | 0.00 |
| SW:SR72_HUMAN  | SRP72    | 45 | 1  | 0.89 | 0.00 |
| GP:AF236056_1  | GP73     | 45 | 3  | 0.89 | 0.04 |
| GP:AF250859_1  | MGAT1.2  | 45 | 1  | 0.90 | 0.00 |
| SW:ROH2_HUMAN  | HNRPH2   | 45 | 1  | 0.90 | 0.00 |
| GPN:AF130092_1 | KIAA1049 | 45 | 4  | 0.92 | 0.08 |
| SW:CN37_HUMAN  | CNP      | 45 | 14 | 0.92 | 0.15 |
| GP:AK021647_1  | MPPE1    | 45 | 1  | 0.93 | 0.00 |
| SW:PPAL_HUMAN  | ACP2     | 45 | 1  | 0.93 | 0.00 |
| SW:EF1B_HUMAN  | EEF1B1   | 45 | 3  | 0.93 | 0.05 |
| GP:AF226054_1  | GK001    | 45 | 2  | 0.94 | 0.01 |
| GP:AC005067_2  | NPD007   | 45 | 2  | 0.94 | 0.17 |
| PIR2:T47174    | CORO1B   | 45 | 3  | 0.94 | 0.18 |
| GP:AB032993_1  | GRIPAP1  | 45 | 1  | 0.95 | 0.00 |
| GP:AJ245820_1  | psk-1    | 45 | 1  | 0.95 | 0.00 |
| GPN:AL512750_1 | FLJ11127 | 45 | 1  | 0.95 | 0.00 |
| GP:AK023834_1  | FLJ13772 | 45 | 1  | 0.97 | 0.00 |

|               |                    |    |    |      |      |
|---------------|--------------------|----|----|------|------|
| SW:LYII_HUMAN | CD36L2             | 45 | 2  | 0.97 | 0.07 |
| PIR2:T47160   | RAB14              | 45 | 6  | 0.97 | 0.25 |
| GP:AJ293573_1 | CEZANNE            | 45 | 1  | 0.98 | 0.00 |
| GP:AK025999_1 | E2-230K            | 45 | 1  | 0.98 | 0.00 |
| SW:SP02_HUMAN | DLG3               | 45 | 1  | 0.98 | 0.00 |
| GP:AB037728_1 | KIAA1307           | 45 | 2  | 0.98 | 0.03 |
| SW:SPC1_HUMAN | KIAA0102           | 45 | 3  | 0.98 | 0.03 |
| PIR2:G01447   | C5ORF8             | 45 | 3  | 0.98 | 0.04 |
| SW:TGT_HUMAN  | TGT                | 45 | 6  | 0.98 | 0.19 |
| GP:AB014555_1 | HIP12              | 45 | 1  | 0.99 | 0.00 |
| PIR2:T46375   | DKFZp434D1319      | 45 | 1  | 0.99 | 0.00 |
| PIR2:I52882   | RCD-8              | 45 | 2  | 0.99 | 0.02 |
| GP:AB037773_1 | KIAA1352           | 45 | 8  | 0.99 | 0.20 |
| GP:AB020697_1 | DDX30              | 45 | 1  | 1.00 | 0.00 |
| GP:AK022827_1 | FLJ12765           | 45 | 1  | 1.00 | 0.00 |
| GP:U25756_1   | Ki nuclear autoant | 45 | 1  | 1.00 | 0.00 |
| SW:CYTC_HUMAN | CST3               | 45 | 2  | 1.00 | 0.03 |
| GP:AK023618_1 | NDRG3              | 45 | 2  | 1.01 | 0.10 |
| SW:TBA4_HUMAN | TUBA4              | 45 | 25 | 1.01 | 0.25 |
| GP:AF129332_1 | MUM2               | 45 | 1  | 1.02 | 0.00 |
| PIR2:T17237   | DKFZP434P106       | 45 | 1  | 1.02 | 0.00 |
| SW:ANX6_HUMAN | ANXA6              | 45 | 3  | 1.02 | 0.02 |

|                 |                    |    |    |      |      |
|-----------------|--------------------|----|----|------|------|
| GP:AK022763_1   | MRPL44             | 45 | 2  | 1.02 | 0.20 |
| GPN:AL109804_12 | KIAA1271           | 45 | 2  | 1.02 | 0.27 |
| GP:AK002163_1   | FLJ11301           | 45 | 1  | 1.03 | 0.00 |
| PIR2:T00050     | DDEF2              | 45 | 1  | 1.03 | 0.00 |
| SW:ACTY_HUMAN   | ACTR1B             | 45 | 1  | 1.03 | 0.00 |
| PIR2:T46333     | macrothioredoxin   | 45 | 1  | 1.04 | 0.00 |
| SW:LEGU_HUMAN   | LGMN               | 45 | 8  | 1.04 | 0.16 |
| GP:AK025520_1   | GOCAP1             | 45 | 3  | 1.04 | 0.22 |
| GPN:AF060511_1  | LOC112473          | 45 | 1  | 1.05 | 0.00 |
| PIR2:PH0268     | EPPK1              | 45 | 3  | 1.05 | 0.01 |
| GP:Z74021_1     | RPS17L4            | 45 | 7  | 1.05 | 0.21 |
| GP:AJ245621_1   | CTL2               | 45 | 17 | 1.05 | 0.27 |
| GP:AC005154_1   | MGC3077            | 45 | 2  | 1.06 | 0.00 |
| GP:X87832_1     | PLXNA1             | 45 | 1  | 1.06 | 0.00 |
| SW:YCE7_HUMAN   | Hypothetical prote | 45 | 1  | 1.06 | 0.00 |
| GP:AF137372_1   | RAB18              | 45 | 2  | 1.06 | 0.01 |
| SW:ANXA_HUMAN   | ANXA10             | 45 | 8  | 1.06 | 0.12 |
| GP:AK001243_1   | FLJ10381           | 45 | 1  | 1.07 | 0.00 |
| GPN:AB040462_1  | RTN4               | 45 | 1  | 1.07 | 0.00 |
| PIR2:T46272     | DKFZP564L0864      | 45 | 1  | 1.07 | 0.00 |
| PIR2:T46254     | RAGD               | 45 | 2  | 1.08 | 0.07 |
| SW:DSR3_HUMAN   | DSCR3              | 45 | 4  | 1.08 | 0.12 |
| SW:SKP1_HUMAN   | SKP1               | 45 | 3  | 1.08 | 0.12 |
| SW:TBB1_HUMAN   | TUBB1              | 45 | 22 | 1.08 | 0.36 |

|                |                   |    |    |      |      |
|----------------|-------------------|----|----|------|------|
| PIR2:T12544    | TBL2              | 45 | 1  | 1.09 | 0.00 |
| GP:AL049795_2  | LOC200081         | 45 | 2  | 1.09 | 0.06 |
| GP:AB011163_1  | KIF1B             | 45 | 1  | 1.10 | 0.00 |
| SW:KNLC_HUMAN  | KLC               | 45 | 1  | 1.10 | 0.00 |
| GP:AF272357_1  | NPDC1             | 45 | 2  | 1.10 | 0.01 |
| GP:AB040882_1  | KIAA1449          | 45 | 1  | 1.11 | 0.00 |
| GP:AF226045_1  | MRPS22            | 45 | 1  | 1.11 | 0.00 |
| GP:D42085_1    | KIAA0095          | 45 | 1  | 1.11 | 0.00 |
| GP:AF151069_1  | RPML2             | 45 | 4  | 1.11 | 0.04 |
| PIR2:T50639    | GPSN2             | 45 | 5  | 1.12 | 0.09 |
| SW:PHB_HUMAN   | PHB               | 45 | 1  | 1.13 | 0.00 |
| PIR2:T00345    | KIAA0590          | 45 | 1  | 1.14 | 0.00 |
| GP:AK001718_1  | FLJ10856          | 45 | 2  | 1.14 | 0.09 |
| GP:AB018270_1  | MYO1D             | 45 | 4  | 1.14 | 0.11 |
| GP:AB015631_1  | TMEM4             | 45 | 10 | 1.14 | 0.17 |
| GP:AF155658_1  | HSPC117           | 45 | 5  | 1.14 | 0.27 |
| GPN:AF196479_1 | tRNA 2,2-dimethyl | 45 | 1  | 1.15 | 0.00 |
| GP:AL451015_9  | unknown           | 45 | 1  | 1.16 | 0.00 |
| GP:AB033011_1  | KIAA1185          | 45 | 7  | 1.17 | 0.22 |
| SW:HEXB_HUMAN  | HEXB              | 45 | 6  | 1.17 | 0.22 |
| GP:AF151062_1  | LIP5 LYST-interac | 45 | 8  | 1.17 | 0.25 |
| SW:VATG_HUMAN  | ATP6G1            | 45 | 1  | 1.18 | 0.00 |

|                |           |    |   |      |      |
|----------------|-----------|----|---|------|------|
| SW:RS3_HUMAN   | RPS3      | 45 | 5 | 1.18 | 0.40 |
| GP:AK022956_1  | TBLR1     | 45 | 1 | 1.19 | 0.00 |
| PIR2:S55474    | LLGL2     | 45 | 1 | 1.19 | 0.00 |
| SW:1A01_HUMAN  | HAAA      | 45 | 4 | 1.19 | 0.02 |
| GP:AB038995_1  | LOC51762  | 45 | 1 | 1.20 | 0.00 |
| GP:AK001050_1  | FLJ10188  | 45 | 1 | 1.20 | 0.00 |
| SW:2ABA_HUMAN  | PPP2R2A   | 45 | 2 | 1.20 | 0.03 |
| GP:AK024781_1  | FLJ21128  | 45 | 2 | 1.20 | 0.05 |
| GP:AB018790_1  | LOC244373 | 45 | 1 | 1.21 | 0.00 |
| GP:AK002135_1  | FLJ11273  | 45 | 1 | 1.21 | 0.00 |
| GP:AF271388_1  | CMAS      | 45 | 3 | 1.21 | 0.16 |
| GP:AB033767_1  | C20orf3   | 45 | 1 | 1.23 | 0.00 |
| SWN:TALI_HUMAN | TLN       | 45 | 1 | 1.23 | 0.00 |
| SWN:PM5P_HUMAN | PM5       | 45 | 4 | 1.23 | 0.27 |
| GPN:AL136131_4 | MRPS18A   | 45 | 1 | 1.24 | 0.00 |
| PIR2:T42646    | KIAA0731  | 45 | 2 | 1.24 | 0.00 |
| GPN:AB014729_1 | SMAP1     | 45 | 2 | 1.24 | 0.01 |
| SW:COPD_HUMAN  | ARCN1     | 45 | 2 | 1.24 | 0.07 |
| GP:AB046829_1  | KIAA1609  | 45 | 1 | 1.25 | 0.00 |
| SW:PTPA_HUMAN  | PPP2R4    | 45 | 2 | 1.25 | 0.01 |
| SWN:UNRI_HUMAN | UNRIP     | 45 | 4 | 1.25 | 0.20 |



|                |                    |    |    |      |      |
|----------------|--------------------|----|----|------|------|
| GP:AC005788_1  | XPTP               | 45 | 4  | 1.26 | 0.20 |
| GP:AK000330_1  | FLJ20323           | 45 | 1  | 1.27 | 0.00 |
| GP:AB037855_1  | KIAA1434           | 45 | 1  | 1.28 | 0.00 |
| PIR2:T08729    | DKFZp566H073       | 45 | 2  | 1.28 | 0.00 |
| GPN:AL449244_1 | Hypothetical prote | 45 | 1  | 1.29 | 0.00 |
| GP:AF005888_1  | NOC4               | 45 | 3  | 1.29 | 0.16 |
| GP:AF116347_1  | SMBP               | 45 | 5  | 1.29 | 0.23 |
| GP:AB020694_1  | KIAA0887           | 45 | 2  | 1.30 | 0.00 |
| GP:U47924_19   | C3f                | 45 | 2  | 1.30 | 0.07 |
| GP:AF161380_1  | Mrpl38             | 45 | 1  | 1.31 | 0.00 |
| SW:DDX3_HUMAN  | DDX3               | 45 | 14 | 1.31 | 0.36 |
| PIR2:T08769    | KIAA0747           | 45 | 8  | 1.34 | 0.14 |
| PIR2:T08787    | TES                | 45 | 1  | 1.35 | 0.00 |
| SW:Y041_HUMAN  | CENTB2             | 45 | 1  | 1.35 | 0.00 |
| GP:AF078860_1  | MRPL42             | 45 | 2  | 1.35 | 0.14 |
| GP:AB002377_1  | KIAA0379           | 45 | 4  | 1.35 | 0.17 |
| GP:AK000325_1  | FLJ20318           | 45 | 2  | 1.35 | 0.22 |
| GP:AB046774_1  | KIAA1554           | 45 | 1  | 1.36 | 0.00 |
| GP:AF239727_1  | MRPL39             | 45 | 1  | 1.36 | 0.00 |
| GP:U97519_1    | PODXL              | 45 | 1  | 1.36 | 0.00 |
| GP:AJ011129_1  | LOC64148           | 45 | 2  | 1.36 | 0.16 |
| GP:AC007055_5  | unknown            | 45 | 1  | 1.37 | 0.00 |
| GP:AJ131186_1  | NMP200             | 45 | 1  | 1.37 | 0.00 |
| GP:AF059524_1  | RTN3               | 45 | 3  | 1.37 | 0.05 |
| PIR2:T12456    | LOC152502          | 45 | 4  | 1.37 | 0.08 |
| GP:AF030291_1  | MCG4               | 45 | 3  | 1.37 | 0.38 |

|                |                    |    |    |      |      |
|----------------|--------------------|----|----|------|------|
| SW:RBP2_HUMAN  | RANBP2             | 45 | 3  | 1.37 | 0.58 |
| SW:HEPS_HUMAN  | HPN                | 45 | 2  | 1.38 | 0.65 |
| GP:AB000095_1  | SPINT1             | 45 | 7  | 1.39 | 0.22 |
| GP:AK000512_1  | C1orf27            | 45 | 1  | 1.40 | 0.00 |
| SW:RL30_HUMAN  | RPL30              | 45 | 27 | 1.40 | 0.25 |
| GPN:AF305686_1 | NJMU-R1            | 45 | 2  | 1.41 | 0.03 |
| GP:S82470_1    | LENG4              | 45 | 4  | 1.41 | 0.09 |
| GP:AF055016_1  | CLLD6              | 45 | 2  | 1.41 | 0.64 |
| GP:U52426_1    | STIM1              | 45 | 5  | 1.42 | 0.34 |
| GP:AF177377_1  | EML4               | 45 | 1  | 1.43 | 0.00 |
| GP:AK022722_1  | FLJ12660           | 45 | 1  | 1.43 | 0.00 |
| GP:AF157325_1  | EPLIN              | 45 | 5  | 1.43 | 0.39 |
| GP:AL096857_1  | hypothetical prote | 45 | 2  | 1.44 | 0.15 |
| GP:AB018313_1  | VPS39              | 45 | 1  | 1.47 | 0.00 |
| SWN:Z272_HUMAN | ZNF272             | 45 | 1  | 1.47 | 0.00 |
| GP:U16406_1    | HIV                | 45 | 1  | 1.47 | 0.00 |
| GP:D87453_1    | MRPS27             | 45 | 2  | 1.47 | 0.17 |
| PIR2:T17219    | SDFR1              | 45 | 4  | 1.48 | 0.37 |
| GP:AK025859_1  | FLJ22206           | 45 | 1  | 1.49 | 0.00 |
| SW:L130_HUMAN  | LRPPRC             | 45 | 4  | 1.50 | 0.09 |
| GP:AK001207_1  | PP199              | 45 | 1  | 1.51 | 0.00 |
| GPN:AF307137_1 | EHD4               | 45 | 1  | 1.51 | 0.00 |
| SW:SMN1_HUMAN  | SMN2               | 45 | 4  | 1.53 | 0.19 |
| GP:U52111_2    | RPL18A             | 45 | 27 | 1.54 | 0.43 |

|                |                      |    |    |      |      |
|----------------|----------------------|----|----|------|------|
| SW:PCP_HUMAN   | PRCP                 | 45 | 1  | 1.57 | 0.00 |
| SW:EP1_HUMAN   | NPC2                 | 45 | 11 | 1.58 | 0.16 |
| PIR2:T46250    | sialic acid-specific | 45 | 1  | 1.60 | 0.00 |
| SW:HE47_HUMAN  | BAT1                 | 45 | 3  | 1.62 | 0.23 |
| GP:AF161494_1  | MRPL15               | 45 | 3  | 1.66 | 0.06 |
| GP:AL035413_5  | KIAA0090             | 45 | 1  | 1.67 | 0.00 |
| GP:AF111168_3  | C14orf3              | 45 | 2  | 1.68 | 0.01 |
| PIR2:T42692    | LOC221927            | 45 | 1  | 1.69 | 0.00 |
| GP:AF214737_1  | C9orf10              | 45 | 10 | 1.70 | 0.57 |
| GP:AK024512_1  | FLJ20859             | 45 | 1  | 1.71 | 0.00 |
| GP:AF157317_1  | LOC55829             | 45 | 1  | 1.76 | 0.00 |
| GP:AF161507_1  | MRPL22               | 45 | 1  | 1.76 | 0.00 |
| SWN:ZH10_HUMAN | ZNF345               | 45 | 1  | 1.79 | 0.00 |
| GP:AB039669_1  | ALEX3                | 45 | 4  | 1.80 | 0.19 |
| SW:DDX9_HUMAN  | DDX9                 | 45 | 2  | 1.82 | 0.00 |
| GP:AB043007_1  | SDF2L1               | 45 | 2  | 1.84 | 0.06 |
| GP:AF154502_1  | DPP7                 | 45 | 2  | 1.90 | 0.01 |
| GP:AK000501_1  | P17.3                | 45 | 1  | 1.93 | 0.00 |
| SW:G732_HUMAN  | TACSTD1              | 45 | 22 | 1.96 | 0.30 |
| PIR2:A49656    | ZNF147               | 45 | 1  | 1.97 | 0.00 |
| GP:AL035689_4  | HINT3                | 45 | 1  | 1.98 | 0.00 |
| GP:S69272_1    | SERPINB6             | 45 | 5  | 1.99 | 0.08 |
| GP:AB046803_1  | KIAA1583             | 45 | 6  | 1.99 | 0.11 |
| GP:AF242773_1  | hypothetical unkn    | 45 | 1  | 2.03 | 0.00 |

|                |          |    |   |      |      |
|----------------|----------|----|---|------|------|
| SWN:U123_HUMAN | PHF5A    | 45 | 1 | 2.03 | 0.00 |
| GP:AK025822_1  | FLJ22169 | 45 | 2 | 2.04 | 0.00 |
| GP:AJ245620_1  | CTL1     | 45 | 1 | 2.08 | 0.00 |
| SWN:NDR2_HUMAN | NDRG2    | 45 | 2 | 2.12 | 0.01 |
| GP:AK022590_1  | FLJ12528 | 45 | 1 | 2.13 | 0.00 |
| GP:D26361_1    | KIAA0042 | 45 | 1 | 2.15 | 0.00 |
| SW:TISB_HUMAN  | BRF1     | 45 | 2 | 2.19 | 0.60 |
| GP:AF220049_1  | MDS029   | 45 | 3 | 2.22 | 0.51 |
| SW:MA32_HUMAN  | C1QBP    | 45 | 9 | 2.23 | 0.22 |
| GP:AF146192_1  | MRPS30   | 45 | 1 | 2.24 | 0.00 |
| GP:U96114_1    | WWP2     | 45 | 1 | 2.25 | 0.00 |
| SW:Z142_HUMAN  | ZNF142   | 45 | 1 | 2.28 | 0.00 |
| SW:ES1_HUMAN   | C21orf33 | 45 | 4 | 2.28 | 0.84 |
| GP:AF151817_1  | LOC51631 | 45 | 1 | 2.31 | 0.00 |
| GP:AK001714_1  | FLJ10852 | 45 | 2 | 2.32 | 0.41 |
| SW:MIF_HUMAN   | MIF      | 45 | 7 | 2.34 | 1.65 |
| GP:AF042284_1  | SQRDL    | 45 | 3 | 2.36 | 0.51 |
| SW:TFPI_HUMAN  | TFPI     | 45 | 1 | 2.40 | 0.00 |
| GP:AF151809_1  | CGI-51   | 45 | 1 | 2.42 | 0.00 |

|                |                   |    |   |      |      |
|----------------|-------------------|----|---|------|------|
| GP:AF085361_1  | MTCH2             | 45 | 5 | 2.58 | 0.98 |
| GP:AJ001258_1  | NIPSNAP1          | 45 | 1 | 2.60 | 0.00 |
| GP:AC004528_1  | WDR18             | 45 | 1 | 2.62 | 0.00 |
| GP:AC004957_1  | LOC222217         | 45 | 3 | 2.64 | 0.14 |
| GP:AK024450_1  | LOC89941          | 45 | 1 | 2.73 | 0.00 |
| SW:PSS8_HUMAN  | PRSS8             | 45 | 1 | 2.73 | 0.00 |
| SW:SBP1_HUMAN  | SELENBP1          | 45 | 2 | 2.89 | 0.05 |
| PIR2:T08789    | CDYL              | 45 | 1 | 3.26 | 0.00 |
| GP:AK022587_1  | FLJ12525          | 45 | 1 | 3.46 | 0.00 |
| GPN:AJ278775_1 | VL1               | 45 | 1 | 7.61 | 0.00 |
| PIR2:S12444    | hypothetical unkn | 45 | 1 | 7.89 | 0.00 |

| Description                                                                                                                                                                                                                                                                                                                                                                                                                                                                 |
|-----------------------------------------------------------------------------------------------------------------------------------------------------------------------------------------------------------------------------------------------------------------------------------------------------------------------------------------------------------------------------------------------------------------------------------------------------------------------------|
| SW:SYV_HUMAN P26640 homo sapiens (human). valyl-trna synthetase (ec 6.1.1.9) (valine--trna ligase) (valrs). 2/1996 [MASS=140377]/Valyl-tRNA synthetase 2, a putative class I tRNA sythetase, predicted to function in aminoacylation of valyl tRNAs for protein biosynthesis                                                                                                                                                                                                |
| SW:PROC_HUMAN P32322 homo sapiens (human). pyrroline-5-carboxylate reductase (ec 1.5.1.2) (p5cr) (p5c reductase). 7/1999 [MASS=33375]/Pyrroline-5-carboxylate reductase 1, catalyzes the NAD(P)H dependent reduction of pyrroline-5-carboxylate to proline in the final step of proline synthesis, may also function NADP+ production in erythrocytes                                                                                                                       |
| SW:SYTC_HUMAN P26639 homo sapiens (human). threonyl-trna synthetase, cytoplasmic (ec 6.1.1.3) (threonine--trna ligase) (thrrs). 6/1994 [MASS=82124]/Threonyl-tRNA synthetase, a class II aminoacyl tRNA synthetase which aminoacylates its cognate tRNAs with threonine for protein synthesis, autoantigen in several autoimmune disorders                                                                                                                                  |
| SW:GLNA_HUMAN P15104 homo sapiens (human). glutamine synthetase (ec 6.3.1.2) (glutamate--ammonia ligase). 12/1998 [MASS=42064]/Glutamine synthase, catalyzes the condensation of glutamate and ammonia to form glutamine, may clear L-glutamate from synapses, reduced expression in the brain and abnormal presence in cerebral spinal fluid is associated with Alzheimer disease                                                                                          |
| SW:SYG_HUMAN P41250 homo sapiens (human). glycyl-trna synthetase (ec 6.1.1.14) (glycine--trna ligase) (glyrs). 10/1996 [MASS=77531]/Glycyl-tRNA synthetase; functions in protein biosynthesis, aminoacylates its cognate tRNAs with phenylalanine/Glycyl-tRNA synthetase, a class II aminoacyl-tRNA synthetase that catalyzes aminoacylation of its cognate tRNA with glycine for protein biosynthesis; an autoantigen in dermatomyositis                                   |
| SW:SYD_HUMAN P14868 homo sapiens (human). aspartyl-trna synthetase (ec 6.1.1.12) (aspartate--trna ligase) (asprs). 11/1997 [MASS=57192]/Aspartyl-tRNA synthetase, a class II aminoacyl tRNA synthetase that aminoacylates its cognate tRNA with aspartate for protein biosynthesis, associates with a multisynthetase complex, N-terminus may aid interaction with elongation factor 1 alpha                                                                                |
| SW:SYA_HUMAN P49588 homo sapiens (human). alanyl-trna synthetase (ec 6.1.1.7) (alanine--trna ligase) (alars). 7/1998 [MASS=106801]/Alanyl-tRNA synthetase, aminoacylates its cognate tRNA with alanine for protein biosynthesis, acts as an autoantigen in patients with polymyositis                                                                                                                                                                                       |
| SW:SYR_HUMAN P54136 homo sapiens (human). arginyl-trna synthetase (ec 6.1.1.19) (arginine--trna ligase) (argrs). 5/2000 [MASS=74977]/Arginyl-tRNA synthetase, aminoacylates its cognate tRNAs with arginine for protein biosynthesis                                                                                                                                                                                                                                        |
| SW:SYM_HUMAN P56192 homo sapiens (human). methionyl-trna synthetase (ec 6.1.1.10) (methionine--trna ligase) (metrs). 12/1998 [MASS=101129]/Methionine-tRNA synthetase, putative tRNA synthetase that is predicted to aminoacylate its cognate tRNAs with methionine for protein biosynthesis, required for rRNA synthesis in the nucleolus                                                                                                                                  |
| SW:SERC_HUMAN Q9y617 homo sapiens (human). phosphoserine aminotransferase (ec 2.6.1.52) (psat). 5/2000 [MASS=35189]/Member of the aminotransferases class-V family of pyridoxal-phosphate-dependent enzymes, has moderate similarity to S. cerevisiae Ser1p, which is a 3-phosphoserine transaminase involved in synthesis of serine from 3-phosphoglycerate                                                                                                                |
| PIR2:B55053 endothelial monocyte-activating protein II precursor - human [MASS=34254]/Endothelial monocyte activating polypeptide II, a proinflammatory cytokine that interacts with ATP synthase and inhibits endothelial cell growth, released during apoptosis, may sensitize tumors to killing by tumor necrosis factor alpha (TNF)                                                                                                                                     |
| GP:U66669_1 Homo sapiens 3-hydroxyisobutyryl-coenzyme A hydrolase mRNA, complete cds. [MASS=42908]/Beta-hydroxyisobutyryl-coenzyme A hydrolase, enzyme that hydrolyzes 3-hydroxyisobutyryl CoA, an intermediate of valine catabolism                                                                                                                                                                                                                                        |
| SW:SYEP_HUMAN P07814 homo sapiens (human). multifunctional aminoacyl-trna synthetase [includes: glutamyl-trna synthetase (ec 6.1.1.17) (glutamate--trna ligase); prolyl-trna synthetase (ec 6.1.1.15) (pro [MASS=163026]/Glutamyl-prolyl-tRNA synthetase, a bifunctional enzyme with two functionally separable domains, one that aminoacylates prolyl-tRNA with proline and another that is believed to aminoacylate glutamyl-tRNA with glutamate for protein biosynthesis |
| SW:SYQ_HUMAN P47897 homo sapiens (human). glutaminyl-trna synthetase (ec 6.1.1.18) (glutamine--trna ligase) (glnrS). 5/2000 [MASS=87799]/Glutaminyl-tRNA synthetase, aminoacylates cognate tRNAs with glutamine for protein biosynthesis, also suppresses FAS (TNFRSF6)-mediated apoptosis by inhibiting ASK1 (MAP3K5) kinase activity, contains N-terminal appended and C-terminal catalytic domains                                                                       |
| SW:SYK_HUMAN Q15046 homo sapiens (human). lysyl-trna synthetase (ec 6.1.1.6) (lysine--trna ligase) (lyrs) (kiaa0070). 7/1998 [MASS=68034]/Lysyl-tRNA synthetase, a class II aminoacyl tRNA synthetase, aminoacylates its cognate tRNAs with lysine for protein biosynthesis, packaged into HIV virions, exists as cytoplasmic and mitochondrial alternative forms                                                                                                           |
| SW:SYI_HUMAN P41252 homo sapiens (human). isoleucyl-trna synthetase, cytoplasmic (ec 6.1.1.5) (isoleucine--trna ligase) (ilers) (irs). 7/1999 [MASS=144959]/Isoleucine-tRNA synthetase, a class I aminoacyl tRNA synthetase, aminoacylates isoleucyl-tRNA with isoleucine for protein biosynthesis, acts as an autoantigen in some autoimmune diseases                                                                                                                      |

|                                                                                                                                                                                                                                                                                                                                                                                                                                                                                 |
|---------------------------------------------------------------------------------------------------------------------------------------------------------------------------------------------------------------------------------------------------------------------------------------------------------------------------------------------------------------------------------------------------------------------------------------------------------------------------------|
| <p>SW:CBS_HUMAN P35520 homo sapiens (human). cystathionine beta-synthase (ec 4.2.1.22) (serine sulfhydrase) (beta-thionase). 10/2001 [MASS=60455]/Cystathionine beta-synthase, catalyzes condensation of serine and homocysteine to form cystathionine, thereby removing toxic homocysteine; deficiency causes homocystinuria with associated vascular disease</p>                                                                                                              |
| <p>SW:AATM_HUMAN P00505 homo sapiens (human). aspartate aminotransferase, mitochondrial precursor (ec 2.6.1.1) (transaminase a) (glutamate oxaloacetate transaminase-2). 7/1999 [MASS=47476]/Mitochondrial aspartate aminotransferase (glutamic oxaloacetic transaminase), catalyzes the reversible transfer of the amino group from aspartate to 2-oxoglutarate to form oxaloacetate and glutamate</p>                                                                         |
| <p>SW:ODB2_HUMAN P11182 homo sapiens (human). lipoamide acyltransferase component of branched-chain alpha-keto acid dehydrogenase complex, mitochondrial precursor (ec 2.3.1.-) (e2) (dihydrolipoamide branch [MASS=53487]/Dihydrolipoamide branched chain transacylase E2, a subunit of the branched-chain alpha-ketoacid dehydrogenase complex; mutation of the corresponding gene causes type II maple syrup urine disease (branched chain alpha ketoaciduria)</p>           |
| <p>SWN:SYFB_HUMAN Q9nsd9 homo sapiens (human). phenylalanyl-trna synthetase beta chain (ec 6.1.1.20) (phenylalanine--trna ligase beta chain) (phers) (protein hspc173). 8/2001 [MASS=66130]/Phenylalanyl-tRNA synthetase beta-subunit, regulatory subunit that forms heterodimers with the catalytic alpha subunit (FARSL), involved in protein synthesis, may play a role in tumorigenic events</p>                                                                            |
| <p>SW:DHE3_HUMAN P00367 homo sapiens (human). glutamate dehydrogenase 1 precursor (ec 1.4.1.3) (gdh). 5/2000 [MASS=61398]/Glutamate dehydrogenase, catalyzes the reversible deamination of L-glutamate into alpha-ketoglutarate, mitochondrial enzyme with role in neurotransmission; deficiency is associated with neurodegenerative disorders</p>                                                                                                                             |
| <p>SW:SERA_HUMAN O43175 homo sapiens (human). d-3-phosphoglycerate dehydrogenase (ec 1.1.1.95) (pgdh). 7/1999 [MASS=56665]/3-phosphoglycerate dehydrogenase, enzyme that catalyzes the first step of serine biosynthesis which is the oxidation of 3-phosphoglycerate to 3-phosphohydroxypyruvate; mutation of the corresponding gene causes microcephaly, retardation, and seizures</p>                                                                                        |
| <p>SW:IVD_HUMAN P26440 homo sapiens (human). isovaleryl-coa dehydrogenase precursor (ec 1.3.99.10) (ivd). 7/1998 [MASS=46319]/Mitochondrial isovaleryl-CoA dehydrogenase, catalyzes the conversion of isovaleryl-CoA to 3-methylcrotonyl-CoA in leucine metabolism; deficiency causes isovaleric acidemia</p>                                                                                                                                                                   |
| <p>SW:SYN_HUMAN O43776 homo sapiens (human). asparaginyl-trna synthetase, cytoplasmic (ec 6.1.1.22) (asparagine--trna ligase) (asnrs). 5/2000 [MASS=62943]/Asparaginyl-tRNA synthetase, a class II aminoacyl tRNA synthetase, aminoacylates its cognate tRNAs with asparagine for protein biosynthesis, acts as an autoantigen in patients with inflammatory myopathy in interstitial lung disease</p>                                                                          |
| <p>SW:G6PE_HUMAN O95479 homo sapiens (human). gdh/6pgl endoplasmic bifunctional protein precursor [includes: glucose 1-dehydrogenase (ec 1.1.1.47) (hexose-6-phosphate dehydrogenase); 6-phosphogluconolactone dehydrogenase [MASS=88879]/Glutamate dehydrogenase, catalyzes the reversible deamination of L-glutamate into alpha-ketoglutarate, mitochondrial enzyme with role in neurotransmission; deficiency is associated with neurodegenerative disorders</p>             |
| <p>SW:AOFB_HUMAN P27338 homo sapiens (human). amine oxidase [flavin-containing] b (ec 1.4.3.4) (monoamine oxidase) (mao-b). 12/1998 [MASS=58763]/Monoamine oxidase B, an oxidase involved in the metabolism of various biologically important amines such as dopamine, requires covalently bound FAD as a cofactor, may play a role in aging and behavior</p>                                                                                                                   |
| <p>(human). amine oxidase [flavin-containing] a (ec 1.4.3.4) (monoamine oxidase) (mao-a). 12/1998 [MASS=59682]/Monoamine oxidase A, an enzyme involved in degradation of amine neurotransmitters, may be associated with neuropsychiatric disorders, including impulsive aggression and panic disorder, and Parkinson disease</p>                                                                                                                                               |
| <p>SW:ASNS_HUMAN P08243 homo sapiens (human). asparagine synthetase [glutamine-hydrolyzing] (ec 6.3.5.4) (glutamine-dependent asparagine synthetase) (ts11 cell cycle control protein). 2/1996 [MASS=64299]/Asparagine synthase, catalyzes ATP-dependent conversion of aspartate to asparagine using an amine group from glutamine or ammonia, expression is induced upon amino acid and glucose deprivation and induction increases cancer cell resistance to chemotherapy</p> |
| <p>SW:GLYM_HUMAN P34897 homo sapiens (human). serine hydroxymethyltransferase, mitochondrial precursor (ec 2.1.2.1) (serine methylase) (glycine hydroxymethyltransferase) (shmt). 5/2000 [MASS=55993]/Serine hydroxymethyltransferase 2 (mitochondrial), a pyridoxal phosphate-dependent enzyme that catalyzes the conversion of serine and tetrahydrofolate to glycine and 5,10-methylenetetrahydrofolate, may play a role in glycine biosynthesis</p>                         |
|                                                                                                                                                                                                                                                                                                                                                                                                                                                                                 |
| <p>SW:DYNA_HUMAN Q14203 homo sapiens (human). dynactin, 150 kda isoform (150 kda dynein-associated polypeptide) (dp-150) (dap-150) (p150-glued) (p135) (fragment). 5/2000 [MASS=140784]/Dynactin 1 ((p150, Glued (Drosophila) homolog), microtubule associated protein, interacts with HsEg5 (KNSL1), may play a role in cell division, level is reduced in apoptotic cells</p>                                                                                                 |
|                                                                                                                                                                                                                                                                                                                                                                                                                                                                                 |
| <p>SW:PHS2_HUMAN P11217 homo sapiens (human). glycogen phosphorylase, muscle form (ec 2.4.1.1) (myophosphorylase). 5/2000 [MASS=97092]/Muscle glycogen phosphorylase, participates in glycogen catabolism; mutation of corresponding gene is associated with McArdle disease</p>                                                                                                                                                                                                |

|                                                                                                                                                                                                                                                                                                                                                                                                                                                                                      |
|--------------------------------------------------------------------------------------------------------------------------------------------------------------------------------------------------------------------------------------------------------------------------------------------------------------------------------------------------------------------------------------------------------------------------------------------------------------------------------------|
| SW:DHSO_HUMAN Q00796 homo sapiens (human). sorbitol dehydrogenase (ec 1.1.1.14) (l-iditol 2-dehydrogenase). 7/1999 [MASS=38165]/Sorbitol dehydrogenase, an enzyme of the polyol pathway which catalyzes the conversion of sorbitol to fructose; may be involved in the development of diabetic complications; deficiency may be associated with some forms of congenital cataracts                                                                                                   |
| SW:ACLY_HUMAN P53396 homo sapiens (human). atp-citrate (pro-s-)-lyase (ec 4.1.3.8) (citrate cleavage enzyme). 10/1996 [MASS=121420]/ATP citrate lyase, catalyzes the formation of acetyl-CoA and oxaloacetate from citrate and CoA with the concomitant hydrolysis of ATP to ADP and phosphate, involved in cholesterol and fatty acid synthesis, nutritionally regulated                                                                                                            |
| SW:LDHM_HUMAN P00338 homo sapiens (human). l-lactate dehydrogenase m chain (ec 1.1.1.27) (ldh-a). 2/1996 [MASS=36558]/Lactate dehydrogenase muscle subunit, catalyzes the reversible NAD-dependent interconversion of pyruvate to L-lactate in glycolysis; mutations in the corresponding gene cause LDH-A deficiency                                                                                                                                                                |
| SW:PHS3_HUMAN P11216 homo sapiens (human). glycogen phosphorylase, brain form (ec 2.4.1.1). 10/1996 [MASS=96683]/Brain glycogen phosphorylase, catalyzes the rate-limiting step in glycogen catabolism, activated by AMP and phosphorylation, may play a role in intestinal development; associated with gastric carcinomas displaying a differentiated intestinal phenotype                                                                                                         |
| SW:GLYG_HUMAN P46976 homo sapiens (human). glycogenin-1 (ec 2.4.1.186). 7/1999 [MASS=37347]Glycogenin (glycogenin glucosyltransferase), autocatalytic and self-glucosylating enzyme that primes de novo glycogen synthesis                                                                                                                                                                                                                                                           |
| SW:ALFA_HUMAN P04075 homo sapiens (human). fructose-bisphosphate aldolase a (ec 4.1.2.13) (muscle-type aldolase). 5/2000 [MASS=39289]/Aldolase A (fructose-bisphosphate aldolase); reversibly cleaves FBP into DHAP and GAP in glycolysis                                                                                                                                                                                                                                            |
| SW:GFA1_HUMAN Q06210 homo sapiens (human). glucosamine--fructose-6-phosphate aminotransferase [isomerizing] 1 (ec 2.6.1.16) (hexosephosphate aminotransferase 1) (d-fructose-6- phosphate amidotransferase [MASS=76616]/Glutamine-fructose-6-phosphate transaminase 1, catalyzes the first step in glucosamine formation, modulates glucose flux and functions in development of insulin resistance, upregulation in kidney associated with diabetic nephropathy                     |
| SW:UGS1_HUMAN P13807 homo sapiens (human). glycogen [starch] synthase, muscle (ec 2.4.1.11). 5/2000 [MASS=83786]/Glycogen synthase 1 (muscle), catalyzes transfer of a glucosyl residue from UDP-glucose to glycogen, stimulated by insulin, Acipimox and Flouxetine; mutations in the corresponding gene may be associated with non-insulin-dependent diabetes mellitus                                                                                                             |
| SW:G3P2_HUMAN P04406 homo sapiens (human). glyceraldehyde 3-phosphate dehydrogenase, liver (ec 1.2.1.12). 7/1999 [MASS=35922]/Glyceraldehyde-3-phosphate dehydrogenase, catalyzes reversible oxidation and phosphorylation of glyceraldehyde-3-phosphate to 1,3-diphosphoglycerate in glycolysis, involved in apoptosis, may play a role in neurodegeneration in diseases like Alzheimer's                                                                                           |
| SW:G6PI_HUMAN P06744 homo sapiens (human). glucose-6-phosphate isomerase (gpi) (ec 5.3.1.9) (phosphoglucose isomerase) (pgi) (phosphohexose isomerase) (phi) (neuroleukin) (nlk). 5/2000 [MASS=63189]/Glucose phosphate isomerase, plays a role in glycolysis and gluconeogenesis, tumor-secreted form (neuroleukin) acts as an autocrine factor to stimulate motility, invasion and metastasis of cancer cells; deficiency is associated with hemolytic anemia                      |
| SW:ENOB_HUMAN P13929 homo sapiens (human). beta enolase (ec 4.2.1.11) (2-phospho-d-glycerate hydro-lyase) (skeletal muscle enolase) (mse). 7/1998 [MASS=46856]/Enolase 3 (muscle-specific enolase, beta enolase), a putative enolase which catalyzes the conversion of 2-phospho-D-glycerate to phosphoenolpyruvate in muscle glycolysis, deficiency is associated with exercise intolerance and myalgias                                                                            |
| GP:AF144074_1 Homo sapiens glucosidase II alpha subunit mRNA, complete cds; similar to sequences encoded by GenBank Accession Numbers D42041 and U92793. [MASS=109438]/Alpha glucosidase II (alpha neutral subunit), trims alpha(1,3)-linked glucose from Glc(3)Man(9)GlcNAc(2) structures, localizes to the endoplasmic                                                                                                                                                             |
| SW:GDE_HUMAN P35573 homo sapiens (human). glycogen debranching enzyme (glycogen debrancher) [includes: 4-alpha-glucanotransferase (ec 2.4.1.25) (oligo-1,4-1,4-glucontransferase); amylo-1,6-glucosidase [MASS=172497]/Glycogen debranching enzyme, (amylo-1,6-glucosidase 4-alpha-glucanotransferase), catalyzes glycantransferase and glucosidase activities required for glycogen degradation; mutations and dysregulation are associated with type III glycogen storage diseases |
| SW:PGK1_HUMAN P00558 homo sapiens (human). phosphoglycerate kinase 1 (ec 2.7.2.3) (primer recognition protein 2) (prp 2). 7/1999 [MASS=44597]/Phosphoglycerate kinase 1, catalyzes conversion of 1,3-diphosphoglycerate to 3-phosphoglycerate in glycolysis, forming one molecule of ATP; PGK1 gene transcription is induced by hypoxia and mutation is associated with non-spherocytic hemolytic anemia                                                                             |
| SW:DHAG_HUMAN P49189 homo sapiens (human). aldehyde dehydrogenase, e3 isozyme (ec 1.2.1.3) (gamma-aminobutyraldehyde dehydrogenase) (ec 1.2.1.19) (r-aminobutyraldehyde dehydrogenase). 5/2000 [MASS=53533]/Gamma-aminobutyraldehyde dehydrogenase (aldehyde dehydrogenase 9, subfamily A1), member of NAD(P)(+)-dependent aldehyde dehydrogenase family, catalyzes the dehydrogenation of gamma-aminobutyraldehyde, may regulate carnitine biosynthesis                             |
| SW:ODO1_HUMAN Q02218 homo sapiens (human). 2-oxoglutarate dehydrogenase e1 component, mitochondrial precursor (ec 1.2.4.2) (alpha-ketoglutarate dehydrogenase). 7/1999 [MASS=113475]/2-Oxoglutarate dehydrogenase (alpha-ketoglutarate dehydrogenase), E1 component of the complex that converts alpha-ketoglutarate to succinyl coenzyme A in the Krebs cycle; deficiency has been observed in Alzheimer and Parkinson disease                                                      |



|                                                                                                                                                                                                                                                                                                                                                                                                                                                                                  |
|----------------------------------------------------------------------------------------------------------------------------------------------------------------------------------------------------------------------------------------------------------------------------------------------------------------------------------------------------------------------------------------------------------------------------------------------------------------------------------|
| <p>SW:K6PL_HUMAN P17858 homo sapiens (human). 6-phosphofructokinase, liver type (ec 2.7.1.11) (phosphofructokinase 1) (phosphohexokinase) (phosphofructo-1-kinase isozyme b). 10/1996 [MASS=85148]/Liver phosphofructokinase, catalyses the phosphorylation of fructose-6-phosphate to fructose-1,6-bisphosphate in glycolysis, deficiency is linked to glycogenesis type VII while overexpression may lead to the cognitive diabilites of Down's syndrome</p>                   |
| <p>SW:DIAC_HUMAN Q01459 homo sapiens (human). di-n-acetylchitobiase precursor (ec 3.2.1.-). 7/1999 [MASS=43760]/Chitobiase (di-N-acetylchitobiase), a lysosomal glycosidase involved in the degradadon of asparagine-linked glycoproteins</p>                                                                                                                                                                                                                                    |
| <p>SW:KPB1_HUMAN P46020 homo sapiens (human). phosphorylase b kinase alpha regulatory chain, skeletal muscle isoform (phosphorylase kinase alpha m subunit). 2/1996 [MASS=137338]/Phosphorylase kinase regulatory subunit alpha-1 (muscle), which phosphorylates and thereby activates muscle-specific glycogen phosphorylase (PYGM); mutations in the corresponding gene are associated with muscle glycogenesis, a glycogen storage disease</p>                                |
| <p>SW:TPIS_HUMAN P00938 homo sapiens (human), and pan troglodytes (chimpanzee). triosephosphate isomerase (ec 5.3.1.1) (tim). 7/1998 [MASS=26538]/Triosephosphate isomerase 1, catalyzes the reversible interconversion of glyceraldehyde 3-phosphate and dihydroxyacetone phosphate in glycolysis; variant forms cause hemolytic anemia and neurodegeneration; variant form is an antigen on melanoma cells</p>                                                                 |
| <p>SW:ENOA_HUMAN P06733 homo sapiens (human). alpha enolase (ec 4.2.1.11) (2-phospho-d-glycerate hydro-lyase) (non-neural enolase) (nne) (phosphopyruvate hydratase). 7/1998 [MASS=47038]/Enolase 1 (alpha enolase), converts 2-phospho-D-glycerate to phosphoenolpyruvate in glycolysis, an autoantigen in multiple autoimmune diseases, shorter alternative form c-myc promoter binding protein (MPB1) is a transcriptional repressor</p>                                      |
| <p>SW:G19P_HUMAN P14314 homo sapiens (human). protein kinase c substrate, 80 kda protein, heavy chain (pkcsh) (80k-h protein). 7/1999 [MASS=59296]/Protein kinase C substrate 80K-H, acidic protein that is phosphorylated by type I and II protein kinase C, may play a role in fibroblast growth factor and Ras signal transduction, may be a receptor for advanced glycation end products</p>                                                                                 |
| <p>GP:AJ131612_1 Homo sapiens dic gene, exons 1-11. [MASS=31325]/Solute carrier family 25 member 10 (dicarboxylate carrier), a putative dicarboxylic acid transporter predicted to reside in the inner mitochondrial membrane, may be involved in gluconeogenesis</p>                                                                                                                                                                                                            |
| <p>SW:ODPB_HUMAN P11177 homo sapiens (human). pyruvate dehydrogenase e1 component beta subunit, mitochondrial precursor (ec 1.2.4.1) (pdhe1-b). 7/1999 [MASS=39219]/E1 beta subunit of pyruvate dehydrogenase complex, oxidatively decarboxylates pyruvate to acetyl-CoA</p>                                                                                                                                                                                                     |
| <p>SW:H XK1_HUMAN P19367 homo sapiens (human). hexokinase, type i (ec 2.7.1.1) (hk i) (brain form hexokinase). 12/1998 [MASS=102503]/Hexokinase Type I (ATP:D-hexose 6-phosphotransferase), catalyzes ATP-dependent conversion of glucose to glucose 6 phosphate in glycolysis, deficiency may lead to non-spherocytic hemolytic anemia</p>                                                                                                                                      |
| <p>GP:AF113123_1 Homo sapiens carbonyl reductase mRNA, complete cds; CR. [MASS=25913]/Protein with high similarity to murine Cbr2, carbonyl reductase, which is involved in differentiation of adipocytes from adipoblasts, member of the glucose/ribitol dehydrogenase family</p>                                                                                                                                                                                               |
| <p>SW:KPY1_HUMAN P14618 homo sapiens (human). pyruvate kinase, m1 isozyme (ec 2.7.1.40) (pyruvate kinase muscle isozyme) (cytosolic thyroid hormone-binding protein) (cthbp) (thbp1). 12/1998 [MASS=57747]/Pyruvate kinase muscle (pyruvate kinase 3), glycolytic enzyme that converts phosphoenolpyruvate to pyruvate with phosphorylation of ADP to ATP, exists as M1 and M2 alternative forms, may have roles in viral transformation and cell differentiation</p>            |
| <p>SW:GNT2_HUMAN Q10469 h alpha-1,6-mannosyl-glycoprotein beta-1,2-n- acetylglucosaminyltransferase (ec 2.4.1.143) (n-glycosyl- oligosaccharide-glycoprotein n-acetylglucosaminyltransferase ii) (beta-1,2-n- [MASS=51550]/UDP-N-acetylglucosamine: alpha-6-D-mannoside-beta-1,2- N-acetylglucosaminyltransferase II, catalyzes the conversion of oligomannose to complex N-glycans; activity is reduced or absent in type II congenital disorders of glycosylation</p>          |
| <p>SW:ODPA_HUMAN P08559 homo sapiens (human). pyruvate dehydrogenase e1 component alpha subunit, somatic form, mitochondrial precursor (ec 1.2.4.1) (pdhe1-a type i). 7/1999 [MASS=43296]/E1 alpha subunit of pyruvate dehydrogenase complex, somatic form, oxidatively decarboxylates pyruvate to acetyl-CoA; mutation of the corresponding gene causes the majority of pyruvate dehydrogenase deficiencies</p>                                                                 |
| <p>SW:GAL1_HUMAN P51570 homo sapiens (human). galactokinase 1 (ec 2.7.1.6). 5/2000 [MASS=42272]/Galactokinase 1, an essential enzyme for galactose metabolism, catalyzes the ATP-dependent phosphorylation of galactose to produce galactose-1-phosphate, deficiency leads to cataract formation</p>                                                                                                                                                                             |
| <p>SW:GLCM_HUMAN P04062 homo sapiens (human). glucosylceramidase precursor (ec 3.2.1.45) (beta-glucocerebrosidase) (acid beta-glucosidase) (d-glucosyl-n-acylsphingosine glucohydrolase) (alglucerase) (imigl [MASS=59697]/Acid beta glucosidase (beta-glucocerebrosidase), a lysosomal membrane protein that hydrolyzes glucosylceramide and glucosylsphingosine, may play a role in epidermal differentiation; mutations in the corresponding gene cause Gaucher's disease</p> |
| <p>SW:INSR_HUMAN P06213 homo sapiens (human). insulin receptor precursor (ec 2.7.1.112) (ir). 5/2000 [MASS=156281]/Insulin receptor, a transmembrane receptor protein tyrosine kinase involved in carbohydrate metabolism, energy pathways, and cell growth; gene mutation is associated with insulin-resistant diabetes mellitus and leprechaunism</p>                                                                                                                          |

|                                                                                                                                                                                                                                                                                                                                                                                                                                                                                           |
|-------------------------------------------------------------------------------------------------------------------------------------------------------------------------------------------------------------------------------------------------------------------------------------------------------------------------------------------------------------------------------------------------------------------------------------------------------------------------------------------|
| <p>SW:ODPX_HUMAN O00330 homo sapiens (human). pyruvate dehydrogenase protein x component, mitochondrial precursor (dihydrolipoamide dehydrogenase-binding protein of pyruvate dehydrogenase complex) (e3-bind [MASS=54138]/Dihydrolipoamide dehydrogenase-binding protein (protein X), lipoyl-containing component of the pyruvate dehydrogenase complex, anchors the dihydrolipoamide dehydrogenase (E3) to the dihydrolipoamide transacetylase (E2) core, deficiency causes disease</p> |
| <p>GP:AB028128_1 Homo sapiens DPM3 mRNA for dolichol-phosphate-mannose synthase, complete cds. [MASS=10080]/Dolichyl-phosphate mannosyltransferase subunit 3 (prostin 1), part of a complex that produces mannosyl donors for glycoconjugate biosynthesis, stabilizes DPM1 and is stabilized by DPM2; expression is associated with a lack of invasive potential in tumors</p>                                                                                                            |
| <p>SW:ACON_HUMAN Q99798 homo sapiens (human). aconitate hydratase, mitochondrial precursor (ec 4.2.1.3) (citrate hydrolyase) (aconitase). 5/2000 [MASS=85425]/Aconitase 2 mitochondrial (aconitate hydratase), catalyzes the conversion of citrate to cis-aconitate in the tricarboxylic acid cycle, may be involved in iron homeostasis; deficiency may be associated with lifelong exercise intolerance</p>                                                                             |
| <p>SW:GL6S_HUMAN P15586 homo sapiens (human). n-acetylglucosamine-6-sulfatase precursor (ec 3.1.6.14) (g6s) (glucosamine-6-sulfatase). 7/1998 [MASS=62082]/N-acetylglucosamine-6-sulfate sulfatase, an enzyme that hydrolyzes sulfate groups from glycosaminoglycans and is involved in the catabolism of heparan sulfate and keratan sulfate; deficiency causes Sanfilippo disease type D</p>                                                                                            |
| <p>SW:KG3B_HUMAN P49841 homo sapiens (human). glycogen synthase kinase-3 beta (ec 2.7.1.37) (gsk-3 beta). 7/1999 [MASS=46768]/Glycogen synthase kinase-3 beta, a serine threonine protein kinase that phosphorylates several cytoplasmic and nuclear proteins, involved in embryonic development, and may hyperphosphorylate tau (MAPT) in</p>                                                                                                                                            |
| <p>SW:DLDH_HUMAN P09622 homo sapiens (human). dihydrolipoamide dehydrogenase, mitochondrial precursor (ec 1.8.1.4). 5/2000 [MASS=54150]/Dihydrolipoamide dehydrogenase, E3 component of pyruvate dehydrogenase complex, also component of alpha-ketoglutarate dehydrogenase and branched-chain alpha-ketoacid dehydrogenase complexes and the glycine cleavage system</p>                                                                                                                 |
| <p>SW:CISY_HUMAN O75390 homo sapiens (human). citrate synthase, mitochondrial precursor (ec 4.1.3.7). 7/1999 [MASS=51706]/Citrate synthase, converts acetyl-CoA and oxaloacetate into citrate plus CoA in the tricarboxylic acid cycle</p>                                                                                                                                                                                                                                                |
| <p>SW:BDH_HUMAN Q02338 homo sapiens (human). d-beta-hydroxybutyrate dehydrogenase precursor (ec 1.1.1.30) (bdh) (3-hydroxybutyrate dehydrogenase) (fragment). 12/1998 [MASS=38137]/D-beta-hydroxybutyrate dehydrogenase, a member of the short-chain alcohol dehydrogenase superfamily that requires phosphatidylcholine as an allosteric activator, involved carbohydrate and fatty acid metabolism</p>                                                                                  |
| <p>SW:BDH_HUMAN P06280 homo sapiens (human). alpha-galactosidase a precursor (ec 3.2.1.22) (melibiase) (alpha-d-galactoside galactohydrolase) (alpha-d-galactosidase a). 7/1998 [MASS=48767]/Alpha-galactosidase A (alpha-D-galactoside galactohydrolase), hydrolyzes glycosphingolipids to release alpha-D-galactosyl residues; mutation of the corresponding gene causes Fabry disease</p>                                                                                              |
| <p>SW:LYAG_HUMAN P10253 homo sapiens (human). lysosomal alpha-glucosidase precursor (ec 3.2.1.20) (acid maltase). 5/2000 [MASS=105338]/Acid alpha-glucosidase, lysosomal alpha-glucosidase that hydrolyzes alpha(1-&gt;4) and alpha(1-&gt;6) linkages in glycogen during glycogen catabolism; heritable deficiency causes glycogenosis type II or Pompe disease</p>                                                                                                                       |
| <p>SW:MAOM_HUMAN P23368 homo sapiens (human). nad-dependent malic enzyme, mitochondrial precursor (ec 1.1.1.38) (nad-me). 5/2000 [MASS=65444]/Malic enzyme 2, a NAD(+)-dependent mitochondrial form of malic enzyme, catalyzes the oxidative decarboxylation of malate to form pyruvate</p>                                                                                                                                                                                               |
| <p>SW:SPHM_HUMAN P51688 homo sapiens (human). n-sulphoglucosamine sulphohydrolase precursor (ec 3.10.1.1) (sulfolglucosamine sulfamidase) (sulphamidase). 5/2000 [MASS=56695]/N-sulfolglucosamine sulphohydrolase (sulfamidase), catalyzes the hydrolysis of the N-linked sulfate group from heparan sulfate; mutation of the corresponding gene causes the lysosomal storage disease Sanfilippo A syndrome (mucopolysaccharidosis type IIIA)</p>                                         |
| <p>SW:IDHP_HUMAN P48735 homo sapiens (human). isocitrate dehydrogenase [nadp], mitochondrial precursor (ec 1.1.1.42) (oxalosuccinate decarboxylase) (idh) (nadp+-specific icdh) (idp) (icd-m). 2/1996 [MASS=50948]/Isocitrate dehydrogenase 2 (NADP+) mitochondrial, catalyzes the oxidative decarboxylation of isocitrate to form alpha-ketoglutarate</p>                                                                                                                                |
| <p>SW:KC2B_HUMAN P13862 homo sapiens (human), mus musculus (mouse), rattus norvegicus (rat), bos taurus (bovine), sus scrofa (pig), oryctolagus cuniculus (rabbit), and gallus gallus (chicken). casein kinase [MASS=24942]/Casein kinase II beta subunit, regulatory subunit of casein kinase II (CK2), confers stability and specificity to CK2 catalytic subunits, may mediate formation of the tetrameric CK2 complex, and may be involved in heat stress response</p>                |
| <p>SW:MA2B_HUMAN O00754 homo sapiens (human). lysosomal alpha-mannosidase precursor (ec 3.2.1.24) (mannosidase, alpha b) (lysosomal acid alpha-mannosidase) (laman). 5/2000 [MASS=113673]/Mannosidase alpha class 2B member 1, catalyzes the hydrolysis of alpha-mannoside linkages in glycoprotein catabolism, enzyme activity is inhibited by azafuranose analogs of mannose, deficiency is associated with alpha-mannosidosis</p>                                                      |
| <p>SW:DHSB_HUMAN P21912 homo sapiens (human). succinate dehydrogenase [ubiquinone] iron-sulfur protein, mitochondrial precursor (ec 1.3.5.1) (ip) (ip subunit of complex ii). 5/2000 [MASS=31629]/Succinate dehydrogenase complex iron sulfur subunit B, part of an enzyme complex that transports electrons from succinate to ubiquinone in the TCA cycle and aerobic respiratory chain, may be involved in familial pheochromocytoma</p>                                                |

|                                                                                                                                                                                                                                                                                                                                                                                                                                                                   |
|-------------------------------------------------------------------------------------------------------------------------------------------------------------------------------------------------------------------------------------------------------------------------------------------------------------------------------------------------------------------------------------------------------------------------------------------------------------------|
| SW:PPCM_HUMAN Q16822 homo sapiens (human). phosphoenolpyruvate carboxykinase, mitochondrial precursor [gtp] (ec 4.1.1.32) (phosphoenolpyruvate carboxylase) (pepck-m). 7/1999 [MASS=70637]/Phosphoenolpyruvate carboxykinase 2, catalyzes the formation of phosphoenolpyruvate by decarboxylation of oxaloacetate, rate-limiting step of gluconeogenesis                                                                                                          |
| SW:DHSA_HUMAN P31040 homo sapiens (human). succinate dehydrogenase [ubiquinone] flavoprotein subunit, mitochondrial precursor (ec 1.3.5.1) (fp) (flavoprotein subunit of complex ii). 5/2000 [MASS=72692]/Succinate dehydrogenase complex subunit A (flavoprotein), transports electrons from succinate to ubiquinone in the TCA cycle and respiratory chain; gene mutation is associated with Leigh syndrome, which is a complex II respiratory chain deficiency |
| SW:K6PP_HUMAN Q01813 homo sapiens (human). 6-phosphofructokinase, type c (ec 2.7.1.11) (phosphofructokinase 1) (phosphohexokinase) (phosphofructo-1-kinase isozyme c) (6-phosphofructokinase, platelet typ [MASS=85596]/Platelet-type phosphofructokinase, rate-limiting enzyme of glycolysis that catalyzes the formation of fructose 1,6-bisphosphate from fructose 6-phosphate and ATP; expression may be elevated upon malignant transformation               |
| SW:GPDM_HUMAN P43304 homo sapiens (human). glycerol-3-phosphate dehydrogenase, mitochondrial precursor (ec 1.1.99.5) (gpd-m) (gpdh-m). 5/2000 [MASS=80815]/Mitochondrial glycerol-3-phosphate dehydrogenase, component of the glycerol phosphate shuttle; mutation of the calcium binding domain in the corresponding gene has been found in a patient with type A diabetes                                                                                       |
| GP:AJ002744_1 Homo sapiens mRNA for UDP-GalNAc:polypeptide N-acetylgalactosaminyltransferase 7. [MASS=75402]/UDP-N-acetyl-alpha-D-galactosamine:polypeptide N-acetylgalactosaminyltransferase 7, enzyme that functions in O-glycosylation and is specific for partially glycosylated substrates                                                                                                                                                                   |
| SW:VINC_HUMAN P18206 homo sapiens (human). vinculin. 12/1998 [MASS=116591]/Vinculin, a cytoskeletal protein that localizes to focal adhesions of cell-cell and cell-matrix junctions, also functions as a tumor suppressor; deficiency of alternate cardiac form, metavinculin, is associated with idiopathic dilated cardiomyopathy                                                                                                                              |
| SW:MOES_HUMAN P26038 homo sapiens (human). moesin (membrane-organizing extension spike protein). 6/1994 [MASS=67689]/Moesin, putative receptor that may link the cytoskeleton and plasma membrane and play roles in microvillus assembly and cell morphogenesis, may be an autoantigen in rheumatoid arthritis and may play a role in impaired brain development in Down syndrome                                                                                 |
| SW:CTN1_HUMAN P35221 homo sapiens (human). alpha-1 catenin (cadherin-associated protein) (alpha e-catenin). 11/1997 [MASS=100071]/Catenin alpha 1 (cadherin-associated protein); binds cadherins and links them with the actin cytoskeleton                                                                                                                                                                                                                       |
| SW:PLAK_HUMAN P14923 homo sapiens (human). junction plakoglobin (desmoplakin iii). 11/1997 [MASS=81498]/Junction plakoglobin (gamma catenin), links cell-cell adhesion molecules with the cytoskeleton, involved in desmosome organization, cell adhesion, cell proliferation, apoptosis; loss of heterozygosity is associated with breast and ovarian tumors                                                                                                     |
| SW:CLD7_HUMAN O95471 homo sapiens (human). claudin-7. 5/2000 [MASS=22390]/Claudin 7, a putative integral membrane protein which may be involved in tight junction formation                                                                                                                                                                                                                                                                                       |
| SW:ITAV_HUMAN P06756 homo sapiens (human). vitronectin receptor alpha subunit precursor (integrin alpha-v) (cd51). 12/1998 [MASS=116052]/Alpha V subunit integrin, a subunit of the vitronectin receptor that is involved in cell-matrix interactions, chemotaxis, phagocytosis and angiogenesis, may contribute to the tumorigenicity of cutaneous malignant melanoma and invasive breast cancer                                                                 |
| GP:BC000441_1 Homo sapiens, junction plakoglobin, clone MGC:8404 IMAGE:2820715, mRNA, complete cds. [MASS=81727]/Junction plakoglobin (gamma catenin), links cell-cell adhesion molecules with the cytoskeleton, involved in desmosome organization, cell adhesion, cell proliferation, apoptosis; loss of heterozygosity is associated with breast and ovarian tumors                                                                                            |
| SW:CTNB_HUMAN P35222 homo sapiens (human). beta-catenin. 2/1996 [MASS=85497]/Beta catenin, links cadherins to the cytoskeleton, may act as a component of the Wnt signal transduction pathway transmitting nuclear signals via a complex with LEF1 and TCF transcription factors; mutations in the gene are associated with various cancers                                                                                                                       |
| SW:EZRI_HUMAN P15311 homo sapiens (human). ezrin (p81) (cytovillin) (villin-2). 12/1998 [MASS=69268]/Villin 2 (ezrin), a member of the band 4.1 superfamily, links the cytoskeleton to the plasma membrane and thereby regulates cell adhesion and cortical morphogenesis, may play a role in rheumatoid arthritis and retinal degeneration                                                                                                                       |
| SW:ITA6_HUMAN P23229 homo sapiens (human). integrin alpha-6 precursor (v1a-6) (cd49f). 5/2000 [MASS=119462]/Integrin alpha 6, a laminin receptor and component of hemidesmosomes, participates in the maintenance of epidermal integrity; gene mutations are responsible for epidermolysis bullosa and overexpression is correlated with carcinoma invasiveness                                                                                                   |
| GP:AB002382_1 Human mRNA for KIAA0384 gene, complete cds. [MASS=104952]/Catenin delta 1, a member of the catenin family of cadherin-binding proteins that link cadherins to the cytoskeleton, acts in cell signaling, plays a role in cell migration, loss of expression is correlated with bladder, colorectal and other cancer                                                                                                                                  |
| SW:ITA5_HUMAN P08648 homo sapiens (human). integrin alpha-5 precursor (fibronectin receptor alpha subunit) (integrin alpha-f) (v1a-5) (cd49e). 7/1999 [MASS=114508]/Integrin alpha 5, acts as a receptor for fibronectin, mediates binding of the cell to the extracellular matrix, involved in cell migration and trophoblast invasion; upregulation is associated with metastatic melanomas and carcinomas                                                      |

|                                                                                                                                                                                                                                                                                                                                                                                                                                                                                          |
|------------------------------------------------------------------------------------------------------------------------------------------------------------------------------------------------------------------------------------------------------------------------------------------------------------------------------------------------------------------------------------------------------------------------------------------------------------------------------------------|
| SW:EFA5_HUMAN P52803 homo sapiens (human). ephrin-a5 precursor (eph-related receptor tyrosine kinase ligand 7) (lerk-7) (al-1). 5/2000 [MASS=26297]/Ephrin A5, a ligand of Eph-related receptor tyrosine kinases that is attached to the membrane via glycosylphosphatidylinositol linkage and is developmentally regulated in the brain, and may play a role during neurogenesis                                                                                                        |
| PIR2:G02390 disintegrin-like metalloproteinase MDC15 (EC 3.4.24.-) - human [MASS=87719]/Metargidin, member of the ADAM family of disintegrin domain-containing zinc metalloproteases, interacts specifically with the alphavbeta3 integrin, upregulated in atherosclerotic lesions and increased expression occurs during atrial fibrillation                                                                                                                                            |
| SW:DESP_HUMAN P15924 homo sapiens (human). desmoplakin i and ii (dpi and dpii) (fragment). 5/2000 [MASS=201359]/Desmoplakin, a desmosomal plaque protein involved in cell adhesion and tumor migration, cleaved by caspases during desmosomal disruption associated with keratinocyte apoptosis; gene mutation is associated with hereditary palmoplantar keratoderma                                                                                                                    |
| SW:LMB2_HUMAN P55268 homo sapiens (human). laminin beta-2 chain precursor (s-laminin). 7/1999 [MASS=196080]/Laminin beta 2 (s-laminin), a basement membrane protein that forms a heterotrimer with other laminin proteins, mediates cell-matrix adhesion, cell migration, and possibly wound healing; lower expression is associated with Walker Warburg Syndrome                                                                                                                        |
| SW:CD81_HUMAN P18582 homo sapiens (human), and pan troglodytes (chimpanzee). cd81 antigen (26 kda cell surface protein tapa-1). 5/2000 [MASS=25809]/CD81 antigen, member of the transmembrane 4 superfamily (TM4SF) that regulates lymphoma cell growth, may be involved in cell motility and the defense response, associates with integrins in the plasma membrane                                                                                                                     |
| SW:ATC2_HUMAN P16615 h sarcoplasmic/endoplasmic reticulum calcium atpase isoform 2 (ec 3.6.1.38) (calcium pump 2) (serca2) (sr ca(2+)-atpase 2) (calcium- transporting atpase sarcoplasmic reticulum type, [MASS=114757]/Sarcoplasmic reticulum Ca2+-ATPase 2 (slow twitch muscle, cardiac, and nonmuscle form), pumps calcium from the cytoplasm to the ER; reduced activity in the heart is implicated in dilated cardiomyopathy and gene mutations are associated with Darier disease |
| SWN:ARVC_HUMAN O00192 homo sapiens (human). armadillo repeat protein deleted in velo-cardio-facial syndrome. 8/2001 [MASS=104642]/Armadillo repeat gene deleted in velocardiocardial syndrome, binds cadherins and may play a role in cell adhesion at the adherens junction; hemizyosity of the corresponding gene is associated with velocardiocardial syndrome                                                                                                                        |
| SW:RSP4_HUMAN P08865 homo sapiens (human). 40s ribosomal protein sa (p40) (34/67 kda laminin receptor) (colon carcinoma laminin-binding protein) (nem/1chd4). 5/2000 [MASS=32854]/Laminin receptor 1, a ribosomal protein of the small 40S ribosomal subunit, plays a role in cancer cell and basement membrane glycoprotein laminin interactions during tumor invasion and metastasis, expression correlates with cancer cell aggressiveness                                            |
| SW:RB13_HUMAN P51153 homo sapiens (human). ras-related protein rab-13. 12/1998 [MASS=22774]/Ras-related GTP-binding protein 13, a putative RAB small monomeric GTPase that is likely to play a role in intracellular protein trafficking and cell adhesion                                                                                                                                                                                                                               |
| SW:PTPF_HUMAN P10586 homo sapiens (human). lar protein precursor (leukocyte antigen related) (ec 3.1.3.48). 10/1994 [MASS=211845]/Protein tyrosine phosphatase receptor-type F (leukocyte common antigen related), regulates insulin receptor signaling and cell migration, inhibits tumor formation in nude mice                                                                                                                                                                        |
| SW:MIC2_HUMAN P14209 homo sapiens (human). t-cell surface glycoprotein e2 precursor (e2 antigen) (cd99) (mic2 protein) (12e7). 5/2000 [MASS=18848]/T-cell surface glycoprotein E2, a cell surface glycoprotein involved in T cell adhesion and apoptosis, activates MAP kinases, may be involved in Golgi-membrane transport, downregulated in EBV-associated Hodgkins disease                                                                                                           |
| SW:C166_HUMAN Q13740 homo sapiens (human). cd166 antigen precursor (activated leukocyte-cell adhesion molecule) (alcam). 7/1999 [MASS=65132]/Activated leukocyte cell adhesion molecule, an immunoglobulin superfamily member and ligand for CD6, involved in hematopoietic cell adhesion, may play a role in osteogenesis, marker for tumor progression in malignant melanoma                                                                                                           |
| GP:U17032_1 Human p190-B (p190-B) mRNA, complete cds; member of the Rho GAP family. [MASS=171569]/Rho GTPase activating protein 5/Rho GTPase-activating protein (GAP) 5, has GAP activity for ARHA, RAC1 and CDC42, which are ras-related GTP binding proteins of the rho subfamily; may be involved in the integrin receptor signaling pathway and in cell adhesion                                                                                                                     |
| SWN:JAM1_HUMAN Q9y624 homo sapiens (human). junctional adhesion molecule precursor (jam) (platelet adhesion molecule 1) (pam-1) (platelet f11 receptor). 8/2001 [MASS=32583]/Junctional adhesion molecule 1, participates in platelet adhesion and aggregation and may play roles in intracellular signaling, the assembly of tight junctions, and the inflammatory response, may be involved in the pathogenesis of immune thrombocytopenia                                             |
| SW:ITB1_HUMAN P05556 homo sapiens (human). fibronectin receptor beta subunit precursor (integrin beta-1) (cd29) (integrin via-4 beta subunit). 7/1999 [MASS=88465]/Integrin beta 1, involved in extracellular matrix interactions and signal transduction, plays roles in cell adhesion, migration, proliferation and development, may be involved in tumor metastasis                                                                                                                   |
| GP:U64791_1 Human Golgi membrane sialoglycoprotein MG160 (GLG1) mRNA, complete cds; fibroblast growth factor. [MASS=134593]/Golgi apparatus protein 1, a cysteine-rich membrane sialoglycoprotein that may be a receptor for fibroblast growth factor (FGF), may be involved in cell adhesion                                                                                                                                                                                            |
| Human cysteine-rich fibroblast growth factor receptor (CFR-1) mRNA/Golgi apparatus protein 1, a cysteine-rich membrane sialoglycoprotein that may be a receptor for fibroblast growth factor (FGF), may be involved in cell adhesion                                                                                                                                                                                                                                                     |

|                                                                                                                                                                                                                                                                                                                                                                                                                                                                                                                                                                                                                                                                                                                       |
|-----------------------------------------------------------------------------------------------------------------------------------------------------------------------------------------------------------------------------------------------------------------------------------------------------------------------------------------------------------------------------------------------------------------------------------------------------------------------------------------------------------------------------------------------------------------------------------------------------------------------------------------------------------------------------------------------------------------------|
| <p>SW:NB8M_HUMAN P17568 homo sapiens (human). nadh-ubiquinone oxidoreductase b18 subunit (ec 1.6.5.3) (ec 1.6.99.3) (complex i-b18) (ci-b18) (cell adhesion protein sqm1). 7/1998 [MASS=15648]/Subunit of the NADH-ubiquinone oxidoreductase (complex I), a multiprotein complex that transports electrons from NADH to ubiquinone, functions as a cell adhesion molecule with a role in metastasis, may have a role in drug transport</p> <p>GP:AC005609_7 Homo sapiens chromosome 5, BAC clone 203o13 (LBNL H155), complete sequence.</p> <p>[MASS=84896]/Protocadherin alpha 4, a member of a family of cadherin-like cell adhesion proteins that may have a role in forming neuronal connections in the brain</p> |
| <p>SW:LU_HUMAN P50895 homo sapiens (human). lutheran blood group glycoprotein precursor (b-cam cell surface glycoprotein) (auberger b antigen) (f8/g253 antigen). 11/1997 [MASS=67375]/Precursor of Lutheran blood group glycoprotein and B-CAM, laminin receptors and cell adhesion molecules, have a role in the blood-brain barrier, contribute to vasoocclusion in sickle cell disease and possibly tumorigenesis</p> <p>SW:LMG1_HUMAN P11047 homo sapiens (human). laminin gamma-1 chain precursor (laminin b2 chain). 7/1998 [MASS=177607]/Laminin C1, an extracellular matrix glycoprotein that may be involved in cell-matrix adhesion and the regulation of cell shape</p>                                   |
|                                                                                                                                                                                                                                                                                                                                                                                                                                                                                                                                                                                                                                                                                                                       |
| <p>SW:UBCC_HUMAN Q16781 homo sapiens (human). ubiquitin-conjugating enzyme e2-17 kda (ec 6.3.2.19) (ubiquitin- protein ligase) (ubiquitin carrier protein) (ubc13). 7/1999 [MASS=17138]/Ubiquitin-conjugating enzyme E2N (yeast UBC13 homolog), forms heterodimers with ubiquitin-conjugating enzyme E2 variants 1 or 2 (UBE2V1, UBE2V2), and catalyzes formation of unique lysine 63-linked polyubiquitin chains involved in IkkappaB kinase activation</p>                                                                                                                                                                                                                                                          |
| <p>SW:RAPB_HUMAN P09526 homo sapiens (human), and bos taurus (bovine). ras-related protein rap-1b (gtp-binding protein smg p21b). 7/1993 [MASS=20825]/Ras related protein 1b, member of the Ras superfamily of low molecular weight GTP-binding proteins, regulates cell cycle progression and cellular proliferation, may play a role in cAMP-responsive tumorigenesis</p>                                                                                                                                                                                                                                                                                                                                           |
| <p>SW:EGFR_HUMAN P00533 homo sapiens (human). epidermal growth factor receptor precursor (ec 2.7.1.112). 12/1998 [MASS=134277]/Epidermal growth factor receptor, a receptor protein tyrosine kinase that binds epidermal growth factor (EGF) and transforming growth factor alpha (TGFA), involved in cell proliferation and differentiation, implicated in tumor invasion and metastasis</p>                                                                                                                                                                                                                                                                                                                         |
| <p>SW:RS4_HUMAN P12750 homo sapiens (human), rattus norvegicus (rat), mus musculus (mouse), mesocricetus auratus (golden hamster), and felis silvestris catus (cat). 40s ribosomal protein s4, x isoform (sin [MASS=29467]/Ribosomal protein S4 X-linked, a component of the small 40S ribosomal subunit with roles in translation, cell cycle, and cell proliferation; gene is X-linked but escapes X inactivation, and may therefore contribute to haploinsufficiency in Turner syndrome</p>                                                                                                                                                                                                                        |
| <p>SW:FKB1_HUMAN P20071 homo sapiens (human), and oryctolagus cuniculus (rabbit). fk506-binding protein (fkbp-12) (peptidyl-prolyl cis-trans isomerase) (ec 5.2.1.8) (ppiase) (rotamase) (immunophilin fkbp12 [MASS=11820]/FK506-binding protein 1A, peptidyl prolyl cis-trans isomerase, modulates the Ca2+-release activity of ryanodine receptors, complex with FK506 inhibits calcineurin-dependent lymphokine gene transcription and mediates FK506 immunosuppressive activity</p>                                                                                                                                                                                                                               |
| <p>SW:P2AA_HUMAN P05323 homo sapiens (human), oryctolagus cuniculus (rabbit), sus scrofa (pig), and bos taurus (bovine). serine/threonine protein phosphatase 2a, catalytic subunit, alpha isoform (ec 3.1.3. [MASS=35594]/Protein phosphatase 2 catalytic subunit alpha, a catalytic subunit of protein phosphatase 2A involved in regulating diverse cellular processes via protein phosphorylation</p>                                                                                                                                                                                                                                                                                                             |
| <p>SW:DYN2_HUMAN P50570 homo sapiens (human). dynamin 2. 10/1996 [MASS=98018]/Dynamin II, member of a family of 100-kD guanosine triphosphatases, regulates budding of endocytic vesicles at the plasma membrane and may function in the formation of transport vesicles at the trans-Golgi</p>                                                                                                                                                                                                                                                                                                                                                                                                                       |
| <p>GP:AB002323_1 Human mRNA for KIAA0325 gene, partial cds. [MASS=238445]/Dynein cytoplasmic heavy chain 1, a member of a family of dynein ATPases that function as motor proteins, plays a role in mitotic spindle formation</p>                                                                                                                                                                                                                                                                                                                                                                                                                                                                                     |
| <p>PIR2:T03842 fission yeast Skb1 protein homolog - human [MASS=72786]/Protein arginine methyltransferase 5, methylates target proteins on arginine residues, may inhibit mitosis</p>                                                                                                                                                                                                                                                                                                                                                                                                                                                                                                                                 |
| <p>GP:U59435_1 Human cell cycle protein p38-2G4 homolog (hG4-1) mRNA, complete cds. [MASS=43813]/Proliferation associated 2G4, interacts with the juxtamembrane domain of ERBB3, dissociates from ERBB3 and translocates from the cytoplasm to the nucleus following treatment with heregulin</p>                                                                                                                                                                                                                                                                                                                                                                                                                     |
| <p>SW:GPS1_HUMAN Q13098 homo sapiens (human). g protein pathway suppressor 1 (gps1 protein) (mfh protein). 11/1997 [MASS=53372]/G protein pathway suppressor 1, suppressor of G protein and MAP kinase-mediated signaling pathways</p>                                                                                                                                                                                                                                                                                                                                                                                                                                                                                |
| <p>SW:RHOG_HUMAN P35238 homo sapiens (human), and cricetus cricetus (black-bellied hamster). rho-related gtp-binding protein rhog. 11/1995 [MASS=21309]/Aplysia ras-related homolog G (RhoG), a Ras-related GTP-binding protein of the rho-subfamily which regulates reorganization of the actin cytoskeleton and may be involved in the regulation of cholesterol excretion in patients with Tangier disease</p>                                                                                                                                                                                                                                                                                                     |
| <p>SW:TCPB_HUMAN P78371 homo sapiens (human). t-complex protein 1, beta subunit (tcp-1-beta) (cct-beta). 7/1999 [MASS=57488]/Chaperonin containing T-complex polypeptide-1 (TCP1) subunit 2, the beta subunit of the chaperonin containing complex (CCT), plays a role in the folding of cytosolic proteins, may be required for the proper folding of cyclin E</p>                                                                                                                                                                                                                                                                                                                                                   |

|                                                                                                                                                                                                                                                                                                                                                                                                                                                                                           |
|-------------------------------------------------------------------------------------------------------------------------------------------------------------------------------------------------------------------------------------------------------------------------------------------------------------------------------------------------------------------------------------------------------------------------------------------------------------------------------------------|
| <p>SW:G25B_HUMAN P21181 homo sapiens (human), mus musculus (mouse), and bos taurus (bovine). g25k gtp-binding protein, brain isoform (gp) (cdc42 homolog). 12/1998 [MASS=21311]/Cell division cycle 42 (GTP binding protein 25kD), Rho GTPase involved in actin cytoskeleton organization, cell migration, cell cycle progression and apoptosis, downregulated in fibroblasts and macrophages from patients with Tangiers disease</p>                                                     |
| <p>GP:AB006534_1 Homo sapiens mRNA for hepatocyte growth factor activator inhibitor type 2, complete cds. [MASS=28169]/Serine protease inhibitor Kunitz type 2 (bikunin), inhibits hepatocyte growth factor activator (HGFA) and serine proteases involved in coagulation and fibrinolysis, overexpressed in pancreatic cancer, may play roles in urolithiasis and glioma progression</p>                                                                                                 |
| <p>SW:143T_HUMAN P27348 homo sapiens (human). 14-3-3 protein tau (14-3-3 protein theta) (14-3-3 protein t-cell) (hs1 protein). 11/1997 [MASS=27764]/14-3-3 theta (14-3-3 tau in T-cells), may modulate T-cell signaling and cytokine expression through interaction with and inhibition of protein kinase C and phosphatidylinositol 3-kinase, may promote cell survival during amyotrophic lateral sclerosis (ALS)</p>                                                                   |
| <p>PIR2:S69890 mitogen inducible gene mig-2 - human [MASS=81993]/Mitogen inducible 2, a mitogen-induced protein that may be involved in cell cycle control and cell proliferation</p>                                                                                                                                                                                                                                                                                                     |
| <p>SW:APP2_HUMAN Q06481 homo sapiens (human). amyloid-like protein 2 precursor (amyloid protein homolog) (apph) (cdeibox binding protein) (cdebp). 5/2000 [MASS=86956]/Amyloid precursor-like protein 2, a nuclear protein which may contribute to neurogenesis and cell cycle control</p>                                                                                                                                                                                                |
| <p>SW:RHOA_HUMAN P06749 homo sapiens (human), and bos taurus (bovine). transforming protein rhoa (h12). 7/1998 [MASS=21768]/Ras homolog gene family member A, monomeric GTPase of the Rho family that mediates cell surface receptor and integrin signaling, induces actin stress fiber and focal adhesion formation, activity may contribute to cellular transformation and tumor invasion</p>                                                                                           |
| <p>SW:TCPH_HUMAN Q99832 homo sapiens (human). t-complex protein 1, eta subunit (tcp-1-eta) (cct-eta) (hiv-1 nef interacting protein). 7/1998 [MASS=59367]/Chaperonin containing T-complex polypeptide-1 (TCP1) subunit 7, the eta subunit of the chaperonin containing complex (CCT), plays a role in protein folding and in the response to chemical stress, may be required for proper folding of cyclin E</p>                                                                          |
| <p>SW:DYNA_HUMAN Q14203 homo sapiens (human). dynactin, 150 kda isoform (150 kda dynein-associated polypeptide) (dp-150) (dap-150) (p150-glued) (p135) (fragment). 5/2000 [MASS=140784]/Dynactin 1 ((p150, Glued (Drosophila) homolog), microtubule associated protein, interacts with HsEg5 (KNSL1), may play a role in cell division, level is reduced in apoptotic cells</p>                                                                                                           |
| <p>SW:RAN_HUMAN P17080 homo sapiens (human). gtp-binding nuclear protein ran (tc4). 12/1998 [MASS=24354]/RAN, member of the ras family of GTP binding proteins, couples completion of DNA synthesis to mitosis and induces mitotic spindle formation, involved in nuclear transport of RNA and proteins, interacts with polyglutamate repeats of the androgen receptor</p>                                                                                                                |
| <p>SW:RAPA_HUMAN P10113 homo sapiens (human), rattus norvegicus (rat), and bos taurus (bovine). ras-related protein rap-1a (c21kg) (krev-1 protein) (gtp-binding protein smg-p21a) (g-22k). 12/1998 [MASS=20987]/RAP1A member of RAS oncogene family (Ras-related protein 1a), a member of the Ras superfamily of low molecular weight GTPases that is involved in cell cycle control and negative regulation of cellular proliferation, acts as a tumor suppressor</p>                   |
| <p>SW:TERA_HUMAN P55072 homo sapiens (human). transitional endoplasmic reticulum atpase (ter atpase) (15s mg(2+)-atpase p97 subunit) (valosin containing protein) (vcp) [contains: valosin]. 7/1999 [MASS=89322]/Valosin-containing protein, a putative clathrin-binding ATPase involved in cell cycle control, ubiquitin-dependent protein degradation, and JAK-STAT signaling, may be involved in DNA repair via BRCA1, may be involved in receptor-mediated endocytosis</p>            |
| <p>SW:TCPD_HUMAN P50991 homo sapiens (human). t-complex protein 1, delta subunit (tcp-1-delta) (cct-delta) (stimulator of tar rna binding). 5/2000 [MASS=57839]/Chaperonin containing T-complex 1 subunit 4 (delta), part of a cytosolic hexadecamer structure involved in ATP-dependent folding of actin, tubulin and other proteins</p>                                                                                                                                                 |
| <p>GP:D88435_1 Homo sapiens mRNA for HsGAK, complete cds. [MASS=143165]/Cyclin G-associated kinase, a putative serine/threonine protein kinase that shares homology with tensin and auxilin, may play a role in cell cycle regulation</p>                                                                                                                                                                                                                                                 |
| <p>SW:ERB2_HUMAN P04626 homo sapiens (human). receptor protein-tyrosine kinase erbB-2 precursor (ec 2.7.1.112) (p185erbB2) (neu proto-oncogene) (c-erbB-2) (tyrosine kinase-type cell surface receptor her2) [MASS=137910]/Avian erythroblastosis oncogene B 2, a receptor tyrosine kinase and most oncopotent member of the EGF receptor family, heterodimerizes with other EGFRs; overexpression contributes to growth, metastasis and chemoresistance of epithelial-derived tumors</p> |
| <p>SW:PP1A_HUMAN P08129 homo sapiens (human), mus musculus (mouse), rattus norvegicus (rat), and oryctolagus cuniculus (rabbit). serine/threonine protein phosphatase pp1-alpha 1 catalytic subunit (ec 3.1.3 [MASS=37512]/Protein phosphatase 1 catalytic subunit alpha isoform, plays roles in diverse cellular signal transduction processes that involve protein dephosphorylation, regulates of cell growth and apoptosis and may be a tumor suppressor</p>                          |
| <p>SW:FRAP_HUMAN P42345 homo sapiens (human). fkbp-rapamycin associated protein (frap) (rapamycin target protein). 7/1999 [MASS=288892]/FK506 binding protein 12-rapamycin associated protein 1, serine/threonine and 1-phosphatidylinositol 4-kinase, regulates translation, cell cycle and p53 (TP53) -dependent apoptosis; altered expression is associated with recurrent prostate tumors</p>                                                                                         |
| <p>GP:U97276_1 Homo sapiens quiescinc (Q6) mRNA, complete cds, alternatively spliced; alternatively spliced; probable sulfhydryl oxidase; thioredoxin superfamily member. [MASS=82578]/Quiescinc Q6, a quiescence-inducible protein that contains 9 quiescinc homology zones and has similarity to thioredoxins and S. cerevisiae Erv1p and sulfhydryl oxidases, may play a role in the induction of quiescence</p>                                                                       |

|                                                                                                                                                                                                                                                                                                                                                                                                                                                      |
|------------------------------------------------------------------------------------------------------------------------------------------------------------------------------------------------------------------------------------------------------------------------------------------------------------------------------------------------------------------------------------------------------------------------------------------------------|
| PIR2:T00387 KIAA0622 protein - human (fragment) [MASS=141604]/CLIP-associating protein 1 (Mast), a microtubule-associated protein with a putative role in centrosome separation and organization of the bipolar mitotic spindle                                                                                                                                                                                                                      |
| GP:AB020723_1 Homo sapiens mRNA for KIAA0916 protein, partial cds; k06582 cDNA clone for KIAA0916 has a nucleotide substitution at the position 1955 (C- T; nonsense mutation) of the sequence of KIAA0916. [MASS=134896]/Protein associated with Myc, a putative transcriptional regulator that binds the Myc oncoprotein (human Myc) and may regulate Myc activated transcription, binds and inhibits adenyl cyclase types I (ADCY1) and V (ADCY6) |
| SW:NPL1_HUMAN P55209 homo sapiens (human). nucleosome assembly protein 1-like 1 (nap-1 related protein). 10/1996 [MASS=45374]/Nucleosome assembly protein 1-like 1, member of the NAP/SET protein family, binds histones H2A and H2B, a histone chaperone that mediates assembly of nucleosomes, complex with histone acetyltransferase coactivator p300 (EP300) may stimulate transcription                                                         |
| SW:RCC_HUMAN P18754 homo sapiens (human). regulator of chromosome condensation (cell cycle regulatory protein). 7/1999 [MASS=44969]/Regulator of chromosome condensation 1, a chromatin-binding protein that functions as a guanine nucleotide exchange factor for RAN, plays roles in nucleocytoplasmic transport, mitotic spindle formation, and nuclear envelope assembly                                                                         |
| SW:P2BA_HUMAN Q08209 homo sapiens (human). serine/threonine protein phosphatase 2b catalytic subunit, alpha isoform (ec 3.1.3.16) (calmodulin-dependent calcineurin a subunit, alpha isoform) (cam-prp cat [MASS=58688]/Calcineurin A alpha, catalytic subunit of calcium/calmodulin regulated protein phosphatase, regulates activity of transcription factors involved in signal transduction and growth control                                   |
| GP:AF013591_1 Homo sapiens homolog of the Aspergillus nidulans sudD gene product mRNA, complete cds. [MASS=59117]/SudD (suppressor of bimD6 Aspergillus nidulans) homolog, a member of the SUDD family of proteins, has similarity to Aspergillus nidulans SUDD, which is a suppressor of the bimD6 chromosome-spindle attachment defect                                                                                                             |
| SW:RFA3_HUMAN P35244 homo sapiens (human). replication protein a 14 kda subunit (rp-a) (rf-a) (replication factor-a protein 3). 11/1997 [MASS=13569]/Replication protein A 3, a subunit of replication protein A, which is a single-stranded DNA-binding protein complex with roles in DNA replication, repair, and recombination                                                                                                                    |
| SW:CUL2_HUMAN Q13617 homo sapiens (human). cullin homolog 2 (cul-2). 12/1998 [MASS=86956]/Cullin 2, has E3 ubiquitin ligase activity when present in a complex containing von Hippel Lindau tumor suppressor (VHL)- elogin B (TCEB2)- elogin C (TCEB1); modification by ubiquitin-like protein NEDD8 may be important for VHL tumor suppressor function                                                                                              |
| SW:MCM4_HUMAN P33991 homo sapiens (human). dna replication licensing factor mcm4 (cdc21 homolog) (p1-cdc21). 5/2000 [MASS=96611]/Minichromosome maintenance deficient 4, forms a single stranded ATP-dependent DNA helicase with MCM6 and MCM7, may monitor sites of unreplicated DNA, displacement from replicated chromatin may ensure that DNA is only replicated once per cell cycle                                                             |
| SW:BUB3_HUMAN O43684 homo sapiens (human). mitotic checkpoint protein bub3. 5/2000 [MASS=37155]/Budding uninhibited by benzimidazoles 3 homolog, involved in the mitotic spindle checkpoint, localization to unattached kinetochores suggests a role in detecting microtubule attachment, required for the localization of BUB1 and BUB1B to kinetochores                                                                                            |
| SW:ITB1_HUMAN P05556 homo sapiens (human). fibronectin receptor beta subunit precursor (integrin beta-1) (cd29) (integrin $\alpha$ -4 beta subunit). 7/1999 [MASS=88465]/Integrin beta 1, involved in extracellular matrix interactions and signal transduction, plays roles in cell adhesion, migration, proliferation and development, may be involved in tumor metastasis                                                                         |
| SW:NHPX_HUMAN P55769 homo sapiens (human). nhp2/rs6 family protein yel026w homolog (high mobility group-like nuclear protein 2 homolog) (otk27). 5/2000 [MASS=14174]/Non-histone chromosome protein 2 (S. cerevisiae)-like 1, a member of a family of RNP-associated proteins, a component of the spliceosome and rRNA processing machinery, recognizes a shared stem-internal loop-stem structure in its RNA targets                                |
|                                                                                                                                                                                                                                                                                                                                                                                                                                                      |
| SW:ARP3_HUMAN P32391 homo sapiens (human), and bos taurus (bovine). actin-like protein 3 (actin-2). 7/1999 [MASS=47371]/Actin-related protein 3 homolog, a component of the Arp2/3 protein complex, which is involved in actin cytoskeleton organization and biogenesis and may have a role in cell motility                                                                                                                                         |
| SW:AR41_HUMAN O15143 homo sapiens (human). arp2/3 complex 41 kda subunit (p41-arc). 12/1998 [MASS=40950]/Actin related protein 2/3 complex 1A, component of the Arp2/3 complex, interacts directly with an ARPC4 and ARPC5 heterodimer, may have a role in Arp2/3 complex assembly or maintenance, may regulate complex activity or intracellular distribution                                                                                       |
| SW:AR21_HUMAN O15145 homo sapiens (human). arp2/3 complex 21 kda subunit (p21-arc). 12/1998 [MASS=20547]/Actin related protein 2/3 complex subunit 3 (21 kDa), a component of the Arp2/3 complex, may participate in the regulation of actin polymerization, may have a role in the protrusion of lamellipodia, has an essential function in at least HeLa cells                                                                                     |
| SW:ARP2_HUMAN O15142 homo sapiens (human). actin-like protein 2. 7/1999 [MASS=44761]/Actin-related protein 2 homolog, a component of the Arp2/3 protein complex, which is involved in actin filament nucleation and polymerization, may form the nucleation interface with the pointed end of the actin filament                                                                                                                                     |

|                                                                                                                                                                                                                                                                                                                                                                                                                                                                                                                                                                                                                                                             |
|-------------------------------------------------------------------------------------------------------------------------------------------------------------------------------------------------------------------------------------------------------------------------------------------------------------------------------------------------------------------------------------------------------------------------------------------------------------------------------------------------------------------------------------------------------------------------------------------------------------------------------------------------------------|
| <p>SW:AR34_HUMAN O15144 homo sapiens (human). arp2/3 complex 34 kda subunit (p34-arc). 7/1998 [MASS=34333]/Actin related protein 2/3 complex subunit 2, component of the Arp2/3 complex, which is involved in assembly of the actin cytoskeleton, interacts directly with ARPC4, possibly as an early intermediate in Arp2/3 complex formation</p>                                                                                                                                                                                                                                                                                                          |
| <p>SW:CAP1_HUMAN Q01518 homo sapiens (human). adenylyl cyclase-associated protein 1 (cap 1). 10/1996 [MASS=51673]/Adenylyl cyclase-associated protein 1, putative homolog of bifunctional <i>S. cerevisiae</i> Srv2p, C-terminus mediates actin binding and may play a role in regulating cell growth and morphogenesis, the N-terminal domain may bind and/or regulate adenylyl cyclase</p>                                                                                                                                                                                                                                                                |
| <p>GP:U40572_1 Human beta2-syntrophin (SNT B2) mRNA, complete cds; contains two pleckstrin homology domains and a domain related to both the tumor discs-large protein and the zonula occludens protein; dystrophin-binding intracellular membrane cytoskeletal protein. [MASS=57950]/Syntrophin beta 2, a membrane-associated protein that binds to dystrophin (DMD) and utrophin-dystrophin related protein (UTRN), may link proteins to the actin cytoskeleton</p>                                                                                                                                                                                       |
| <p>SW:VAB2_HUMAN P21281 homo sapiens (human). vacuolar atp synthase subunit b, brain isoform (ec 3.6.1.34) (endomembrane proton pump 58 kda subunit) (v-atpase b subunit) (ho57). 7/1999 [MASS=56517]/Vacuolar-type H(+)-ATPase (beta isoform 2), 56 kDa subunit of the ATPase catalytic domain which may assist in transepithelial H+ transport in the kidney, may effect vacuolar acidification, and may play a role in the polarization of osteoclasts</p>                                                                                                                                                                                               |
| <p>SW:NDR1_HUMAN Q92597 homo sapiens (human). ndrg1 protein (differentiation-related gene 1 protein) (drg1) (reducing agents and tunicamycin-responsive protein) (rtp) (nickel- specific induction protein ca [MASS=42835]/N-myc downstream regulated gene 1, induced by nickel, homocysteine, 2-mercaptoethanol, and tunicamycin, involved in cellular differentiation and negative control of cell proliferation, downregulated in a variety of cancers</p>                                                                                                                                                                                               |
| <p>SW:TRAL_HUMAN Q12931 homo sapiens (human). tumor necrosis factor type 1 receptor associated protein (trap-1) (fragment). 5/2000 [MASS=75342]/Heat shock protein 75, member of the HSP90 family of molecular chaperones, binds and refolds denatured retinoblastoma (RB1) protein during M phase and after heat shock, binds the intracellular domain of tumor necrosis factor receptor type 1</p>                                                                                                                                                                                                                                                        |
| <p>PIR2:JC4775 p58k protein - human [MASS=57580]/The 58,000-dalton cellular inhibitor of the interferon-induced double-stranded RNA-activated protein kinase (PKR) is a member of the tetratricopeptide repeat family of proteins/DnaJ (Hsp40) homolog subfamily C member 3 (protein kinase inhibitor p58), a member of the tetratricopeptide repeat family of proteins that may act as a cochaperone that inhibits the activity of double-stranded RNA-dependent protein kinase (PRKR)</p>                                                                                                                                                                 |
| <p>SW:MRP1_HUMAN P33527 homo sapiens (human). multidrug resistance-associated protein 1. 5/2000 [MASS=171561]/ATP-binding cassette subfamily C member 1 (multiple drug resistance protein 1), an ATP-binding cassette transporter that acts as a multidrug efflux pump conferring resistance to lipophilic drugs and chemotherapeutic agents</p>                                                                                                                                                                                                                                                                                                            |
| <p>heat shock 70 kda protein 4 (heat shock 70-related protein app-2/Heat shock 70kD protein 4, putative ATP-binding molecular chaperone and member of the HSP110 family, binds RNA, may play a role in stress response and RNA stability</p>                                                                                                                                                                                                                                                                                                                                                                                                                |
| <p>SW:AOP2_HUMAN P30041 homo sapiens (human). antioxidant protein 2 (ec 1.11.1.7) (24 kda protein) (liver 2d page spot 40) (red blood cells page spot 12). 12/1998 [MASS=24904]/Protein with strong similarity to anti-oxidant proteins, member of the AhpC/TSA family</p>                                                                                                                                                                                                                                                                                                                                                                                  |
| <p>SW:MRP4_HUMAN O15439 homo sapiens (human). multidrug resistance-associated protein 4 (fragment). 5/2000 [MASS=18448]/Multidrug resistance protein 4, a member of the ATP-binding cassette transporter superfamily, transports cAMP, cGMP, and estradiol 17-beta-D-glucuronide, acts as a multidrug efflux pump, may be involved in cellular detoxification and xenobiotic resistance/Multidrug resistance protein 4, a member of the ATP-binding cassette transporter superfamily, transports cAMP, cGMP, and estradiol 17-beta-D-glucuronide, acts as a multidrug efflux pump, may be involved in cellular detoxification and xenobiotic resistance</p> |
| <p>SW:HS71_HUMAN P08107 homo sapiens (human). heat shock 70 kda protein 1 (hsp70.1) (hsp70-1/hsp70-2). 5/2000 [MASS=70052]/Heat shock 70 kDa protein 1A, a member of the HSP70 chaperone family involved in protein folding, translocation, and complex assembly, blocks AU-rich mRNA decay by nuclear sequestering of AU-rich binding protein, may contribute to celiac disease</p>                                                                                                                                                                                                                                                                        |
| <p>SW:TDX2_HUMAN Q06830 homo sapiens (human). thioredoxin peroxidase 2 (thioredoxin-dependent peroxide reductase 2) (proliferation-associated protein pag) (natural killer cell enhancing factor a) (nkef-a). [MASS=22110]/Peroxiredoxin 2, a thioredoxin peroxidase member of the AhpC-TSA family, acts as an antioxidant, enhances natural killer activity, may be involved in erythrocyte differentiation, exists as a membrane-associated form in erythrocytes</p>                                                                                                                                                                                      |
| <p>SW:ENPL_HUMAN P14625 homo sapiens (human). endoplasmic precursor (94 kda glucose-regulated protein) (grp94) (gp96 homolog) (tumor rejection antigen 1). 10/1996 [MASS=92469]/Tumor rejection antigen 1, a putative molecular chaperone that may play roles in protein folding, cytoprotection, the immune response, and the heat shock and stress responses; vaccination with TRA1 elicits immune responses to cancer</p>                                                                                                                                                                                                                                |
| <p>SW:DNJ2_HUMAN P31689 homo sapiens (human). dnaJ protein homolog 2 (hsj-2). 7/1999 [MASS=44868]/DnaJ homolog subfamily A member 1, heat shock protein, expressed in many tissues</p>                                                                                                                                                                                                                                                                                                                                                                                                                                                                      |



|                                                                                                                                                                                                                                                                                                                                                                                                                                                                                      |
|--------------------------------------------------------------------------------------------------------------------------------------------------------------------------------------------------------------------------------------------------------------------------------------------------------------------------------------------------------------------------------------------------------------------------------------------------------------------------------------|
| GP:AB015798_1 Homo sapiens HSJ2 mRNA for DnaJ homolog, complete cds; DnaJ homologue HSJ2a. [MASS=36087]/DnaJ homolog subfamily A member 1, heat shock protein, expressed in many tissues                                                                                                                                                                                                                                                                                             |
| SW:MK01_HUMAN P28482 homo sapiens (human). mitogen-activated protein kinase 1 (ec 2.7.1.-) (extracellular signal-regulated kinase 2) (erk2) (mitogen-activated protein kinase 2) (map kinase 2) (mapk 2) [MASS=41390]/Mitogen-activated protein kinase 1, a serine-threonine kinase effector of the RAS-MAP kinase pathway, translocates to the nucleus to mediate transcription when activated, involved in the regulation of cell growth, differentiation, migration and apoptosis |
| SW:TDX1_HUMAN P32119 homo sapiens (human). thioredoxin peroxidase 1 (thioredoxin-dependent peroxide reductase 1) (thiol-specific antioxidant protein) (tsa) (prp) (natural killer cell enhancing factor b) [MASS=21892]/Peroxiredoxin 1, oxidative stress-inducible antioxidant protein with peroxidase activity, may have anticytotoxic and antiapoptotic activity and may have a role in cell proliferation                                                                        |
| SW:RAC1_HUMAN P15154 homo sapiens (human), mus musculus (mouse), and canis familiaris (dog). ras-related c3 botulinum toxin substrate 1 (p21-rac1) (ras-like protein tc25). 12/1998 [MASS=21450]/Ras-related C3 botulinum toxin substrate 1, a monomeric GTPase of the Rho family, involved in transducing signals that regulate proliferation, apoptosis, cytoskeletal organization, and response to oxidative stress, contributes to tumor cell invasiveness                       |
| SW:A4_HUMAN P05067 homo sapiens (human). alzheimer's disease amyloid a4 protein precursor (protease nexin-ii) (pn-ii) (appi) [contains: beta-amyloid protein (beta-app) (a-beta)]. 5/2000 [MASS=86943]/Amyloid beta (A4) precursor protein, cell surface protease inhibitor that reduces copper, deposits of proteolytic peptide products are found in Alzheimer's disease and Down syndrome brains, deficiency is associated with early-onset Alzheimer's disease                   |
| PIR2:T00361 hypothetical protein KIAA0678 - human (fragment) [MASS=114535]/Protein containing a DnaJ domain, which are part of chaperone (protein folding) system that mediates interaction with heat shock proteins, has moderate similarity to a region of <i>C. elegans</i> rme-8, which is required for some types of endocytosis                                                                                                                                                |
| SW:MYO10_HUMAN P35580 homo sapiens (human). myosin heavy chain, nonmuscle type b (cellular myosin heavy chain, type b) (nmhc-b). 12/1998 [MASS=228939]/Myosin heavy chain 10 (non-muscle), a putative ATP- and actin-binding motor protein; expression of an alternative splice form is coincident with neuronal cell differentiation                                                                                                                                                |
| SW:HS9B_HUMAN P08238 homo sapiens (human). heat shock protein hsp 90-beta (hsp 84) (hsp 90). 5/2000 [MASS=83163]/Heat shock 90kD protein 1 beta, involved in regulation of both cytochrome c-dependent apoptosis and antiapoptosis via the Akt/PKB (AKT1) serine-threonine kinase, elevated expression is reported in patients with active systemic lupus erythematosus (SLE)                                                                                                        |
| SW:BCR_HUMAN P11274 homo sapiens (human). breakpoint cluster region protein (ec 2.7.1.-). 7/1999 [MASS=142806]/Breakpoint cluster region, GTPase-activating protein for p21rac with serine/threonine kinase activity; translocation of the corresponding gene is associated with Philadelphia chromosome-positive chronic myeloid leukemia                                                                                                                                           |
| SW:SODC_HUMAN P00441 homo sapiens (human). superoxide dismutase [cu-zn] (ec 1.15.1.1). 5/2000 [MASS=15805]/Copper zinc superoxide dismutase, an enzyme that catalyzes the dismutation of the superoxide radical to molecular oxygen and hydrogen peroxide; mutations are associated with some cases of familial amyotrophic lateral sclerosis                                                                                                                                        |
| GP:D87116_1 Human mRNA for MAP kinase kinase 3b ,complete cds; MKK3b. [MASS=39318]/Mitogen activated protein kinase kinase 3, phosphorylates MAP kinase p38, involved in stress and inflammatory responses, senescence, and apoptosis, also has roles in ischemic kidney injury, and H. influenzae infection                                                                                                                                                                         |
| SW:PPOL_HUMAN P09874 homo sapiens (human). poly [adp-ribose] polymerase (ec 2.4.2.30) (parp) (adprt) (nad(+) adp-ribosyltransferase) (poly[adp-ribose] synthetase). 11/1997 [MASS=112953]/ADP-ribosyltransferase, catalyzes formation of ADP ribose polymers attached to proteins using NAD(+) as substrate in response to DNA damage, modulates chromatin structure and plays a role in DNA repair and apoptosis                                                                    |
| SW:AOPP_HUMAN P30044 homo sapiens (human). putative peroxisomal antioxidant enzyme (liver tissue 2d-page spot 71b). 12/1998 [MASS=16864]/Peroxiredoxin 5, catalyzes the reduction of hydrogen peroxide through Cys sulfhydryl group oxidation and reduction by thioredoxin, may be involved in oxidative stress and inflammatory responses, may contribute to tendon degeneration during aging                                                                                       |
| SW:GST1_HUMAN P10620 homo sapiens (human). microsomal glutathione s-transferase 1 (ec 2.5.1.18) (microsomal gst- 1). 5/2000 [MASS=17599]/Microsomal glutathione S-transferase 1, may play a role in protection against oxidative stress                                                                                                                                                                                                                                              |
| SW:H105_HUMAN Q92598 homo sapiens (human). heat-shock protein 105 kda (heat shock 110 kda protein) (kiaa0201). 5/2000 [MASS=96865]/Heat shock protein (105 kDa), member of the high molecular weight family of heat shock proteins, expression is induced by heat shock and is increased in cancer cells                                                                                                                                                                             |
| GP:AB032903_1 Homo sapiens GMPR2 mRNA for guanosine monophosphate reductase isolog, complete cds. [MASS=37874]/Guanosine monophosphate reductase, enzyme with a predicted role in purine interconversion                                                                                                                                                                                                                                                                             |
| SW:TDXM_HUMAN P30048 homo sapiens (human). mitochondrial thioredoxin-dependent peroxide reductase precursor (antioxidant protein 1) (aop-1) (mer5 protein homolog) (hbc189). 5/2000 [MASS=27693]/Peroxiredoxin 3, a mitochondrial antioxidant protein involved in oxygen and radical metabolism, has an antiapoptotic function, and inactivated by the apoptosis-inducing lectin abrin A                                                                                             |
| SW:CATA_HUMAN P04040 homo sapiens (human). catalase (ec 1.11.1.6). 5/2000 [MASS=59756]/Catalase, a tetrameric hemoprotein that detoxifies H2O2, part of the oxidative stress response, activity is altered in some forms of cancer and increased during septic shock; gene mutation causes acatalasemia                                                                                                                                                                              |

|                                                                                                                                                                                                                                                                                                                                                                                          |
|------------------------------------------------------------------------------------------------------------------------------------------------------------------------------------------------------------------------------------------------------------------------------------------------------------------------------------------------------------------------------------------|
| PIR2:I38346 elastic titin - human (fragment) [MASS=883024]/Titin, a large sarcomeric protein that extends from the I band to the Z disk of sarcomeres, maintains resting tension in muscle                                                                                                                                                                                               |
| SW:41_HUMAN P11171 homo sapiens (human). protein 4.1 (band 4.1) (p4.1). 5/2000 [MASS=93239]/Erythrocyte membrane protein band 4.1, maintains cell shape by linking glycophorin C (GYPC) and band 3 proteins with the spectrin (SPTA1)-based cytoskeletal network; mutations in the corresponding gene are associated with hereditary elliptocytosis                                      |
| GP:U83668_1 Human beta-tubulin (TUB4q) gene, complete cds. [MASS=48377]/Protein of beta-tubulin subfamily, has similarity to beta2-tubulin (TUBB2), may have a role in the pathogenesis of facioscapulohumeral muscular dystrophy (FSHD1)                                                                                                                                                |
| alpha-actinin 4 (non-muscle alpha-actinin 4) (f-actin cross linking protein)/Alpha-actinin, a non-muscle cell actin-binding protein that has a role in endocytosis; a tumor suppressor, prognostic marker for breast cancer and mutations in the gene cause familial focal segmental glomerulosclerosis                                                                                  |
| myosin I beta/Myosin IC, member of a family of ATPase motor proteins, predicted to participate in actin filament organization at the plasma membrane, may show ATP-independent actin filament binding, interacts with CBL                                                                                                                                                                |
| SW:VINC_HUMAN P18206 homo sapiens (human). vinculin. 12/1998 [MASS=116591]/Vinculin, a cytoskeletal protein that localizes to focal adhesions of cell-cell and cell-matrix junctions, also functions as a tumor suppressor; deficiency of alternate cardiac form, metavinculin, is associated with idiopathic dilated cardiomyopathy                                                     |
| GP:AK022489_1 Homo sapiens cDNA FLJ12427 fis, clone MAMMA1003127, highly similar to MYOSIN I ALPHA; unnamed protein product. [MASS=31145]/Myosin IB, a member of the unconventional myosin family of motor ATPases                                                                                                                                                                       |
| SW:COF1_HUMAN P23528 homo sapiens (human). cofilin, non-muscle isoform. 11/1997 [MASS=18502]/Non-muscle cofilin, an actin-binding protein that assists translocation of actin from the cytoplasm to the nucleus; inactivation through phosphorylation by LIM-kinase leads to actin depolymerization                                                                                      |
| SW:DEST_HUMAN P18282 homo sapiens (human), and sus scrofa (pig). destrin (actin depolymerizing factor) (adf). 11/1997 [MASS=18506]/Actin depolymerizing factor, a member of the ADF/cofilin family that binds to actin and is predicted to depolymerize F-actin by altering filament tilt and twist; present in rod-like inclusions within neurons in the brains of Alzheimer's patients |
| SW:MYSA_HUMAN P13533 homo sapiens (human). myosin heavy chain, cardiac muscle alpha isoform. 7/1998 [MASS=223690]/Cardiac myosin heavy chain 6, a putative structural component of muscle, may be required for heart development and function; mutation of corresponding gene is associated with familial hypertrophic cardiomyopathy                                                    |
| SW:ARP3_HUMAN P32391 homo sapiens (human), and bos taurus (bovine). actin-like protein 3 (actin-2). 7/1999 [MASS=47371]/Actin-related protein 3 homolog, a component of the Arp2/3 protein complex, which is involved in actin cytoskeleton organization and biogenesis and may have a role in cell motility                                                                             |
| PIR2:T13151 adapter protein CMS - human [MASS=71451]/CMS: an adapter molecule involved in cytoskeletal rearrangements/CD2-associated protein, an adaptor that may play a role in kidney function and mediate cytoskeletal rearrangement; mouse Cd2ap is associated with congenital nephrotic syndrome and possibly Nail-Patella syndrome nephropathy and polycystic kidney disease       |
| PIR2:A53016 myosin heavy chain VA - human (fragment) [MASS=96052]/Class V myosin (Myoxin), a member of the myosin family of proteins, a motor protein that may be involved in vesicle transport and epidermal differentiation; mutation of the corresponding gene is associated with Griscelli syndrome                                                                                  |
| SW:MOES_HUMAN P26038 homo sapiens (human). moesin (membrane-organizing extension spike protein). 6/1994 [MASS=67689]/Moesin, putative receptor that may link the cytoskeleton and plasma membrane and play roles in microvillus assembly and cell morphogenesis, may be an autoantigen in rheumatoid arthritis and may play a role in impaired brain development in Down syndrome        |
| SW:EGFR_HUMAN P00533 homo sapiens (human). epidermal growth factor receptor precursor (ec 2.7.1.12). 12/1998 [MASS=134277]/Epidermal growth factor receptor, a receptor protein tyrosine kinase that binds epidermal growth factor (EGF) and transforming growth factor alpha (TGFA), involved in cell proliferation and differentiation, implicated in tumor invasion and metastasis    |
| SW:AR41_HUMAN O15143 homo sapiens (human). arp2/3 complex 41 kda subunit (p41-arc). 12/1998 [MASS=40950]/Actin related protein 2/3 complex 1A, component of the Arp2/3 complex, interacts directly with an ARPC4 and ARPC5 heterodimer, may have a role in Arp2/3 complex assembly or maintenance, may regulate complex activity or intracellular distribution                           |
| SW:DIA1_HUMAN O60610 homo sapiens (human). diaphanous protein homolog 1. 5/2000 [MASS=138979]/Diaphanous, contains profilin and rho binding domains and possibly regulates actin polymerization in inner ear hair cells; mutation of the gene is associated with nonsyndromal-postlingual deafness                                                                                       |
| SW:RHOB_HUMAN P01121 homo sapiens (human), mus musculus (mouse), and rattus norvegicus (rat). transforming protein rhob (h6). 12/1998 [MASS=22123]/Ras-related GTP binding protein of the rho subfamily, member B; may regulate assembly of actin stress fibers and focal adhesions; very strongly similar to murine Arhb                                                                |
| SW:CTN1_HUMAN P35221 homo sapiens (human). alpha-1 catenin (cadherin-associated protein) (alpha e-catenin). 11/1997 [MASS=100071]/Catenin alpha 1 (cadherin-associated protein); binds cadherins and links them with the actin cytoskeleton                                                                                                                                              |
| SW:MYSN_HUMAN P35579 homo sapiens (human). myosin heavy chain, nonmuscle type a (cellular myosin heavy chain, type a) (nmhc-a). 12/1998 [MASS=226532]/Non-muscle myosin heavy chain 9; motor protein that provides force for muscle contraction, cytokinesis and phagocytosis; contains an ATPase head domain and a rod-like tail domain                                                 |
| GP:AF177171_1 Homo sapiens tropomodulin 3 (TMOD3) mRNA, complete cds. [MASS=39581]/Tropomodulin 3, putative actin-capping protein for the slow-growing end of filamentous actin, expressed ubiquitously                                                                                                                                                                                  |

|                                                                                                                                                                                                                                                                                                                                                                                                                                                                 |
|-----------------------------------------------------------------------------------------------------------------------------------------------------------------------------------------------------------------------------------------------------------------------------------------------------------------------------------------------------------------------------------------------------------------------------------------------------------------|
| SW:PLAK_HUMAN P14923 homo sapiens (human). junction plakoglobin (desmoplakin iii). 11/1997 [MASS=81498]/Junction plakoglobin (gamma catenin), links cell-cell adhesion molecules with the cytoskeleton, involved in desmosome organization, cell adhesion, cell proliferation, apoptosis; loss of heterozygosity is associated with breast and ovarian tumors                                                                                                   |
| SW:AR21_HUMAN O15145 homo sapiens (human). arp2/3 complex 21 kda subunit (p21-arc). 12/1998 [MASS=20547]/Actin related protein 2/3 complex subunit 3 (21 kDa), a component of the Arp2/3 complex, may participate in the regulation of actin polymerization, may have a role in the protrusion of lamellipodia, has an essential function in at least HeLa cells                                                                                                |
| GP:AB008515_1 Homo sapiens mRNA for RanBPM, complete cds. [MASS=55082]/Ran-binding protein 9, plays a role in microtubule nucleation, interacts specifically with RAN guanosine triphosphatase and mediates Ran-dependent centrosomal function                                                                                                                                                                                                                  |
| SW:CAPB_HUMAN P47756 homo sapiens (human). f-actin capping protein beta subunit (capz). 5/2000 [MASS=30629]/Capping protein Z-line beta 1, a subunit of an actin-binding protein that caps the barbed end of actin filaments and regulates actin polymerization dynamics, may have a role in cell motility                                                                                                                                                      |
| SWN:LAD1_HUMAN O00515 homo sapiens (human). ladinin 1 (lad-1) (120 kda linear iga bullous dermatosis antigen) (97 kda linear iga bullous dermatosis antigen) (linear iga disease antigen homolog) (lada). 8 [MASS=57157]/Ladinin 1, an anchoring filament protein that is a component of basement membranes, recognized by circulating IgA autoantibodies in linear IgA disease, which is a blistering skin disease, may maintain dermal epidermal cohesion     |
| SW:MLEN_HUMAN P16475 homo sapiens (human), bos taurus (bovine), and sus scrofa (pig). myosin light chain alkali, non-muscle isoform (mlc3nm) (lc17a) (lc17-nm). 5/2000 [MASS=16799]/Myosin alkali light chain smooth muscle and non-muscle, a member of the family of alkali myosin light chains, which play a role in the interaction between myosin and actin, intracellular vesicle movement, cytokinesis and cell location                                  |
| SW:DAG1_HUMAN Q14118 homo sapiens (human). dystroglycan precursor (dystrophin-associated glycoprotein 1) [contains: alpha-dystroglycan (alpha-dg); beta-dystroglycan (beta-dg)]. 5/2000 [MASS=97581]/Dystroglycan 1, component of a dystrophin-associated glycoprotein complex that binds laminin, may link the extracellular matrix and cytoskeleton, may play a role in synaptic function; deficiency is involved in the pathogenesis of muscular dystrophies |
| SW:IQGA_HUMAN P46940 homo sapiens (human). ras gtpase-activating-like protein iqgap1 (p195) (kiaa0051). 7/1999 [MASS=189252]/IQ motif-containing GTPase activating protein 1, an actin-associated calmodulin (CALM1)-regulated protein that serves as an effector for CDC42 and RAC1, modulates E-cadherin (CDH1)-mediation cellular adhesion, upregulated in colon carcinomas                                                                                  |
| GP:BC000441_1 Homo sapiens, junction plakoglobin, clone MGC:8404 IMAGE:2820715, mRNA, complete cds. [MASS=81727]/Junction plakoglobin (gamma catenin), links cell-cell adhesion molecules with the cytoskeleton, involved in desmosome organization, cell adhesion, cell proliferation, apoptosis; loss of heterozygosity is associated with breast and ovarian tumors                                                                                          |
| SW:CTNB_HUMAN P35222 homo sapiens (human). beta-catenin. 2/1996 [MASS=85497]/Beta catenin, links cadherins to the cytoskeleton, may act as a component of the Wnt signal transduction pathway transmitting nuclear signals via a complex with LEF1 and TCF transcription factors; mutations in the gene are associated with various cancers                                                                                                                     |
| GP:AB008567_1 Homo sapiens mRNA for beta-spectrin III, complete cds. [MASS=271295]/Beta III spectrin, member of a family of actin-cross linking proteins of the membrane-associated cytoskeleton, associates with Golgi and cytoplasmic vesicles                                                                                                                                                                                                                |
| SW:EZR1_HUMAN P15311 homo sapiens (human). ezrin (p81) (cytovillin) (villin-2). 12/1998 [MASS=69268]/Villin 2 (ezrin), a member of the band 4.1 superfamily, links the cytoskeleton to the plasma membrane and thereby regulates cell adhesion and cortical morphogenesis, may play a role in rheumatoid arthritis and retinal degeneration                                                                                                                     |
| SW:ABP2_HUMAN P21333 homo sapiens (human). endothelial actin-binding protein (abp-280) (nonmuscle filamin) (filamin 1). 11/1997 [MASS=280761]/Filamin A (alpha), an actin crosslinking phosphoprotein involved in actin cytoskeletal organization, signal transduction, and mechanical stimulus response, may contribute to cell adhesion; genetic mutations are associated with periventricular heterotopia                                                    |
| GP:AB002382_1 Human mRNA for KIAA0384 gene, complete cds. [MASS=104952]/Catenin delta 1, a member of the catenin family of cadherin-binding proteins that link cadherins to the cytoskeleton, acts in cell signaling, plays a role in cell migration, loss of expression is correlated with bladder, colorectal and other cancer                                                                                                                                |
| GP:AF128536_1 Homo sapiens cytoplasmic phosphoprotein PACSIN2 mRNA, complete cds; related to PACSIN1; contains CDC15 N-terminal domain, 3 EH domain-binding NPF motifs, and a C-terminal SH3 domain. [MASS=55905]/Protein kinase C and casein kinase substrate in neurons 2, member of the PACSIN family of cytoplasmic adapter proteins, may function to organize the actin cytoskeleton and regulate vesicular traffic                                        |
| SW:TBB2_HUMAN P05217 homo sapiens (human). tubulin beta-2 chain. 7/1999 [MASS=49831]/Tubulin beta 2, a member of the tubulin family of structural proteins that polymerizes to form microtubules, soluble form binds nuclear envelope, may serve as a marker for prostate adenocarcinoma                                                                                                                                                                        |
| GP:AF151793_1 Homo sapiens ALG-2 interacting protein 1 (AIP1) mRNA, complete cds. [MASS=96079]/Protein with very strong similarity to murine Mm.28049, which interacts with the activin type IIA receptor and signaling molecule Smad3, has very strong similarity to rat Rn.29998, which is a synaptic scaffolding protein, contains PDZ and WW domains                                                                                                        |

|                                                                                                                                                                                                                                                                                                                                                                                                                                                                                                |
|------------------------------------------------------------------------------------------------------------------------------------------------------------------------------------------------------------------------------------------------------------------------------------------------------------------------------------------------------------------------------------------------------------------------------------------------------------------------------------------------|
| <p>SW:UTRO_HUMAN P46939 homo sapiens (human). utrophin (dystrophin-related protein 1) (drp1) (drp). 7/1999 [MASS=394494]/Utrophin, a membrane-associated protein that interacts with cytoskeletal proteins, associated with muscle and neuromuscular junction development and cell adhesion, may partially compensate for dystrophin (DMD) deficiency in Duchenne's muscular dystrophy</p>                                                                                                     |
| <p>SW:ACTB_HUMAN P02570 homo sapiens (human), mus musculus (mouse), rattus norvegicus (rat), bos taurus (bovine), ovis aries (sheep), equus caballus (horse), trichosurus vulpecula (brush-tailed possum), an [MASS=41737]/Beta actin, a non-muscle cell actin that is the site of action for cytochalasin B effects on cell motility and also inhibits phospholipase D activity; mutation of the gene is associated with neutrophil dysfunction and recurrent infections</p>                  |
| <p>SW:RHOA_HUMAN P06749 homo sapiens (human), and bos taurus (bovine). transforming protein rhoa (h12). 7/1998 [MASS=21768]/Ras homolog gene family member A, monomeric GTPase of the Rho family that mediates cell surface receptor and integrin signaling, induces actin stress fiber and focal adhesion formation, activity may contribute to cellular transformation and tumor invasion</p>                                                                                                |
| <p>PIR2:T46270 hypothetical protein DKFZp564N1563.1 - human (fragment) [MASS=77321]/Filamin B (beta, actin-binding protein-278), may be involved in actin cytoskeleton organization through interaction with the cytoplasmic domain of glycoprotein Ib alpha (GP1BA) and mediation of thyrotropin-induced actin microfilament disruption</p>                                                                                                                                                   |
| <p>SW:PRO1_HUMAN P07737 homo sapiens (human). profilin i. 12/1998 [MASS=14923]/Profilin I, a protein that regulates actin polymerization in response to extracellular signals and may suppress breast cancer cell tumorigenicity</p>                                                                                                                                                                                                                                                           |
| <p>SW:CAZ2_HUMAN P47755 homo sapiens (human). f-actin capping protein alpha-2 subunit (capz). 12/1998 [MASS=32949]/Capping protein Z-line (alpha 2), subunit of an actin-binding protein that may play a role in cell motility; corresponding gene is amplified in malignant gliomas and may be involved in tumorigenesis</p>                                                                                                                                                                  |
| <p>SW:DREB_HUMAN Q16643 homo sapiens (human). drebrin e. 7/1998 [MASS=71425]/Drebrin 1, developmentally regulated actin-binding protein expressed in brain, levels are reduced in Alzheimer's patients</p>                                                                                                                                                                                                                                                                                     |
| <p>SW:ARP2_HUMAN O15142 homo sapiens (human). actin-like protein 2. 7/1999 [MASS=44761]/Actin-related protein 2 homolog, a component of the Arp2/3 protein complex, which is involved in actin filament nucleation and polymerization, may form the nucleation interface with the pointed end of the actin filament</p>                                                                                                                                                                        |
| <p>SW:SPCN_HUMAN Q13813 homo sapiens (human). spectrin alpha chain, brain (spectrin, non-erythroid alpha chain) (fodrin alpha chain) (sptan1). 11/1997 [MASS=284282]/Non-erythroid alpha-spectrin 1 (alpha-fodrin), a member of a family of actin crosslinking proteins of the membrane-associated cytoskeleton, binds calcium, cleaved during apoptosis, acts as an autoantigen in the development of Sjogren syndrome</p>                                                                    |
| <p>GP:AB002387_1 Human mRNA for KIAA0389 gene, complete cds. [MASS=148714]/Myosin VI, an unconventional myosin motor protein, may function in membrane trafficking in the secretory and endocytic pathways; mutations in the corresponding gene are associated with deafness</p>                                                                                                                                                                                                               |
| <p>SW:ARF6_HUMAN P26438 homo sapiens (human), mus musculus (mouse), and rattus norvegicus (rat). adp-ribosylation factor 6. 12/1998 [MASS=19951]/ADP-ribosylation factor 6, GTP-binding protein that stimulates cholera toxin activity and is involved in endocytosis, exocytosis, membrane trafficking, and possibly regulation of glucose transport</p>                                                                                                                                      |
| <p>SW:RAC1_HUMAN P15154 homo sapiens (human), mus musculus (mouse), and canis familiaris (dog). ras-related c3 botulinum toxin substrate 1 (p21-rac1) (ras-like protein tc25). 12/1998 [MASS=21450]/Ras-related C3 botulinum toxin substrate 1, a monomeric GTPase of the Rho family, involved in transducing signals that regulate proliferation, apoptosis, cytoskeletal organization, and response to oxidative stress, contributes to tumor cell invasiveness</p>                          |
| <p>SW:TBA1_HUMAN P04687 homo sapiens (human). tubulin alpha-1 chain, brain-specific. 7/1999 [MASS=50158]/Alpha-tubulin, a member of a family of structural proteins that polymerize to form microtubules</p>                                                                                                                                                                                                                                                                                   |
| <p>PIR2:G02520 plectin - human [MASS=518488]/Plectin 1, a member of the plakin family that crosslinks the cytoskeleton and the plasma membrane in hemidesmosomes and focal contacts; mutation of the corresponding gene causes muscular dystrophy with epidermolysis bullosa simplex (MDEBS)</p>                                                                                                                                                                                               |
| <p>SW:DESP_HUMAN P15924 homo sapiens (human). desmoplakin i and ii (dpi and dpii) (fragment). 5/2000 [MASS=201359]/Desmoplakin, a desmosomal plaque protein involved in cell adhesion and tumor migration, cleaved by caspases during desmosomal disruption associated with keratinocyte apoptosis; gene mutation is associated with hereditary palmoplantar keratoderma</p>                                                                                                                   |
| <p>SW:PEBP_HUMAN P30086 homo sapiens (human). phosphatidylethanolamine-binding protein (pebp) (neuropolypeptide h3). 7/1999 [MASS=20926]/Phosphatidylethanolamine-binding protein, binds GTP, may regulate cAMP accumulation, enhance acetylcholine synthesis, and play a role in organizing phospholipids in the myelin sheath</p>                                                                                                                                                            |
| <p>SW:RS29_HUMAN P30054 homo sapiens (human), mus musculus (mouse), rattus norvegicus (rat), and bos taurus (bovine). 40s ribosomal protein s29. 5/2000 [MASS=6546]/Ribosomal protein S29, a component of the small 40S ribosomal subunit, contains a zinc finger-like motif, enhances activity of the tumor suppressor Krev-1 (RAP1A)</p>                                                                                                                                                     |
| <p>SW:DYL1_HUMAN Q15701 homo sapiens (human), mus musculus (mouse), rattus norvegicus (rat), and oryctolagus cuniculus (rabbit). dynein light chain 1, cytoplasmic (protein inhibitor of neuronal nitric oxid [MASS=10366]/Dynein cytoplasmic light polypeptide (protein inhibitor of nitric oxide synthase), a component of the cytoplasmic dynein motor complex, inhibits neuronal nitric oxide synthase (NOS1), regulates the proapoptotic activity of BCL2-interacting protein BCL2L11</p> |
| <p>GP:AF022728_1 Homo sapiens beta-dystrobrevin (BDTN) mRNA, complete cds; member of the dystrophin gene family. [MASS=71356]/Beta-dystrobrevin, a member of the dystrobrevin subfamily within the dystrophin family of proteins, part of the syntrophin-associated protein complex</p>                                                                                                                                                                                                        |

|                                                                                                                                                                                                                                                                                                                                                                                                                   |
|-------------------------------------------------------------------------------------------------------------------------------------------------------------------------------------------------------------------------------------------------------------------------------------------------------------------------------------------------------------------------------------------------------------------|
| SW:AR34_HUMAN O15144 homo sapiens (human). arp2/3 complex 34 kda subunit (p34-arc). 7/1998 [MASS=34333]/Actin related protein 2/3 complex subunit 2, component of the Arp2/3 complex, which is involved in assembly of the actin cytoskeleton, interacts directly with ARPC4, possibly as an early intermediate in Arp2/3 complex formation                                                                       |
| GP:AJ001714_1 Homo sapiens mRNA for myosin-IXA. [MASS=90079]/Myosin IXA, a member of the unconventional myosin family that contains a GTPase activating protein (GAP) domain; the corresponding gene is a candidate for Bardet Biedl syndrome, characterized by mental retardation, obesity, and retinitis pigmentosa                                                                                             |
| GP:AB032179_1 Homo sapiens EHM2 mRNA, complete cds; similar to mouse Ehm2. [MASS=58628]/Protein containing two FERM (Band 4.1) family domains, which link cytoplasmic proteins to membranes, has low similarity to myosin regulatory light chain interacting protein (human MIR), which may be linked to mental retardation                                                                                       |
| SW:AAC1_HUMAN P12814 homo sapiens (human). alpha-actinin 1, cytoskeletal isoform (f-actin cross linking protein). 11/1997 [MASS=102974]/Alpha-actinin isoform 1, a non-muscle cell actin-binding protein that interacts with collagen (human COL17A1) and functions in actin filament stabilization, may play a role in cell shape control                                                                        |
| SW:MAPB_HUMAN P46821 homo sapiens (human). microtubule-associated protein 1b [contains: map1 light chain lc1]. 7/1999 [MASS=270620]/MAP1B                                                                                                                                                                                                                                                                         |
| SW:TPMN_HUMAN P12324 homo sapiens (human). tropomyosin, cytoskeletal type (tm30-nm). 7/1999 [MASS=29033]/Tropomyosin 4, a member of a family of actin filament binding proteins involved in a variety of cytoskeletal-related functions; fusion of the gene with ALK has been seen in inflammatory myofibroblastic tumors                                                                                         |
| SW:MAP4_HUMAN P27816 homo sapiens (human). microtubule-associated protein 4. 6/1994 [MASS=121180]/Microtubule-associated protein 4, a microtubule-associated protein that stabilizes microtubules and may regulate microtubule dynamics during mitosis; target of a Poliovirus protease                                                                                                                           |
| PIR2:A55575 ankyrin 3, long splice form - human [MASS=480403]/Ankyrin 3 (ankyrin G), may link integral membrane proteins to the cytoskeleton, may play a role in localizing sodium channels to the axonal initial segment and nodes of Ranvier, may play a role in vesicle transport                                                                                                                              |
| SW:ANK1_HUMAN P16157 homo sapiens (human). ankyrin 1 (erythrocyte ankyrin) (ankyrin r) (ankyrins 2.1 and 2.2). 5/2000 [MASS=206146]/Ankyrin 1, a cytoskeletal anchor protein that attaches cytoskeletal elements to the plasma membrane; alteration of the corresponding gene is associated with hereditary spherocytosis                                                                                         |
| GP:AB018266_1 Homo sapiens mRNA for KIAA0723 protein, complete cds. [MASS=94623]/Homo sapiens matrin 3 mRNA, complete cds/Matrin 3, an acidic protein that is a component of the nuclear matrix                                                                                                                                                                                                                   |
| SW:ADDA_HUMAN P35611 homo sapiens (human). erythrocyte adducin alpha subunit. 7/1998 [MASS=80971]/Adducin 1 alpha, a subunit of the membrane-skeletal adducin complex, may promote assembly of spectrin-actin complexes and regulate ion transport; mutations in the corresponding gene may be associated with hypertension                                                                                       |
| SW:PNL1_HUMAN Q99719 homo sapiens (human). peanut-like protein 1 (cell division control related protein 1) (cdcrel-1). 5/2000 [MASS=42777]/Peanut-like (CDCREL-1), member of the septin family of GTP-binding proteins, may be involved in vesicle targeting and fusion, may have a role in velo cardio facial or DiGeorge syndrome; PNUTL1 gene translocations are associated with acute myeloid leukemia        |
| SW:LAMA_HUMAN P02545 homo sapiens (human). lamin a (70 kda lamin). 5/2000 [MASS=74139]/Lamin A, a structural protein of the nuclear lamina; mutations of the corresponding gene are associated with Emery-Dreifuss muscular dystrophy and partial lipodystrophies                                                                                                                                                 |
| SW:LAM1_HUMAN P20700 homo sapiens (human). lamin b1. 5/2000 [MASS=66277]/Lamin B1, present in the nuclear outer membrane, may be a structural member of the nuclear lamina, cleaved by proteases during apoptosis, targeted by autoantibodies in chronic fatigue syndrome                                                                                                                                         |
|                                                                                                                                                                                                                                                                                                                                                                                                                   |
| SW:NPL1_HUMAN P55209 homo sapiens (human). nucleosome assembly protein 1-like 1 (nap-1 related protein). 10/1996 [MASS=45374]/Nucleosome assembly protein 1-like 1, member of the NAP/SET protein family, binds histones H2A and H2B, a histone chaperone that mediates assembly of nucleosomes, complex with histone acetyltransferase coactivator p300 (EP300) may stimulate transcription                      |
| SW:RCC_HUMAN P18754 homo sapiens (human). regulator of chromosome condensation (cell cycle regulatory protein). 7/1999 [MASS=44969]/Regulator of chromosome condensation 1, a chromatin-binding protein that functions as a guanine nucleotide exchange factor for RAN, plays roles in nucleocytoplasmic transport, mitotic spindle formation, and nuclear envelope assembly                                      |
| SW:HMG1_HUMAN P09429 homo sapiens (human). high mobility group protein hmg1 (hmg-1). 5/2000 [MASS=24763]/High-mobility group (nonhistone chromosomal) protein 1, induces DNA bending, binds damaged DNA, activates and represses transcription, involved in the DNA damage response and V(D)J recombination, may be a target for therapeutic intervention of sepsis                                               |
| SW:PPOL_HUMAN P09874 homo sapiens (human). poly [adp-ribose] polymerase (ec 2.4.2.30) (parp) (adprt) (nad(+) adp-ribosyltransferase) (poly[adp-ribose] synthetase). 11/1997 [MASS=112953]/ADP-ribosyltransferase, catalyzes formation of ADP ribose polymers attached to proteins using NAD(+) as substrate in response to DNA damage, modulates chromatin structure and plays a role in DNA repair and apoptosis |

|                                                                                                                                                                                                                                                                                                                                                                                                                                                                                              |
|----------------------------------------------------------------------------------------------------------------------------------------------------------------------------------------------------------------------------------------------------------------------------------------------------------------------------------------------------------------------------------------------------------------------------------------------------------------------------------------------|
| <p>SW:KU86_HUMAN P13010 h atp-dependent dna helicase ii, 80 kda subunit (lupus ku autoantigen protein p86) (ku86) (ku80) (86 kda subunit of ku antigen) (thyroid- lupus autoantigen) (tlaa) (ctc box binding [MASS=82573]/X-ray repair complementing defective repair in Chinese hamster cells 5, binds ds-DNA free ends, binds Ku70 (G22P1) to regulate DNA-PK, involved in DNA repair, V(D)J recombination, cell adhesion, and enzyme activation, may play a role in tumor progression</p> |
| <p>GP:AF041483_1 Homo sapiens histone macroH2A1.2 mRNA, complete cds. [MASS=39601]/H2A histone family member Y, a histone H2A subtype containing a unique non-histone domain, involved in compaction of DNA into nucleosomes and X chromosome inactivation</p>                                                                                                                                                                                                                               |
| <p>SW:RB48_HUMAN Q09028 homo sapiens (human). chromatin assembly factor 1 p48 subunit (caf-1 p48 subunit) (retinoblastoma binding protein p48) (retinoblastoma-binding protein 4) (msi1 protein homolog). 12/ [MASS=47656]/Retinoblastoma binding protein 4, a nuclear protein that forms complexes with a variety of proteins including RB1, HDAC1, BRCA1, E2F, which function in histone acetylation, regulation of cell proliferation, or transcriptional repression</p>                  |
| <p>SW:TOP1_HUMAN P11387 homo sapiens (human). dna topoisomerase i (ec 5.99.1.2). 12/1998 [MASS=90754]/DNA topoisomerase I, a monomeric enzyme that relaxes supercoiled DNA and is mutated in camptothecin (CPT)-resistant human leukemia cell lines, a major self-antigen found in patients with systemic sclerosis</p>                                                                                                                                                                      |
| <p>SW:H33_HUMAN P06351 homo sapiens (human), mus musculus (mouse), rattus norvegicus (rat), oryctolagus cuniculus (rabbit), gallus gallus (chicken), spisula solidissima (atlantic surf-clam), drosophila mel [MASS=15197]/H3 histone family 3A, a member of the H3 histone family of proteins involved in compaction of DNA into nucleosomes, a replacement histone; expression does not depend on DNA replication</p>                                                                      |
|                                                                                                                                                                                                                                                                                                                                                                                                                                                                                              |
| <p>SW:PNL1_HUMAN Q99719 homo sapiens (human). peanut-like protein 1 (cell division control related protein 1) (cdcrel-1). 5/2000 [MASS=42777]/Peanut-like (CDCREL-1), member of the septin family of GTP-binding proteins, may be involved in vesicle targeting and fusion, may have a role in velo cardio facial or DiGeorge syndrome; PNUTL1 gene translocations are associated with acute myeloid leukemia</p>                                                                            |
|                                                                                                                                                                                                                                                                                                                                                                                                                                                                                              |
| <p>SW:G3P2_HUMAN P04406 homo sapiens (human). glyceraldehyde 3-phosphate dehydrogenase, liver (ec 1.2.1.12). 7/1999 [MASS=35922]/Glyceraldehyde-3-phosphate dehydrogenase, catalyzes reversible oxidation and phosphorylation of glyceraldehyde-3-phosphate to 1,3-diphosphoglycerate in glycolysis, involved in apoptosis, may play a role in neurodegeneration in diseases like Alzheimer's</p>                                                                                            |
| <p>SW:DDB1_HUMAN Q16531 h dna damage binding protein 1 (damage-specific dna binding protein 1) (ddb p127 subunit) (daba) (uv-damaged dna-binding protein 1) (uv-ddb 1) (xeroderma pigmentosum group e complem [MASS=126968]/Damage-specific DNA-binding protein 1, larger subunit of a complex that recognizes and binds damaged DNA and stimulates repair, not essential for DNA repair, deficiencies are associated with xeroderma pigmentosum complementation group E</p>                 |
| <p>SW:FRAP_HUMAN P42345 homo sapiens (human). fkbp-rapamycin associated protein (frap) (rapamycin target protein). 7/1999 [MASS=288892]/FK506 binding protein 12-rapamycin associated protein 1, serine/threonine and 1-phosphatidylinositol 4-kinase, regulates translation, cell cycle and p53 (TP53) -dependent apoptosis; altered expression is associated with recurrent prostate tumors</p>                                                                                            |
| <p>SW:PPOL_HUMAN P09874 homo sapiens (human). poly [adp-ribose] polymerase (ec 2.4.2.30) (parp) (adprt) (nad(+) adp-ribosyltransferase) (poly[adp-ribose] synthetase). 11/1997 [MASS=112953]/ADP-ribosyltransferase, catalyzes formation of ADP ribose polymers attached to proteins using NAD(+) as substrate in response to DNA damage, modulates chromatin structure and plays a role in DNA repair and apoptosis</p>                                                                     |
| <p>SW:KU86_HUMAN P13010 h atp-dependent dna helicase ii, 80 kda subunit (lupus ku autoantigen protein p86) (ku86) (ku80) (86 kda subunit of ku antigen) (thyroid- lupus autoantigen) (tlaa) (ctc box binding [MASS=82573]/X-ray repair complementing defective repair in Chinese hamster cells 5, binds ds-DNA free ends, binds Ku70 (G22P1) to regulate DNA-PK, involved in DNA repair, V(D)J recombination, cell adhesion, and enzyme activation, may play a role in tumor progression</p> |
| <p>SW:APE1_HUMAN P27695 homo sapiens (human). dna-(apurinic or apyrimidinic site) lyase (ec 4.2.99.18) (ap endonuclease 1) (apex nuclease) (apen) (ref-1 protein). 12/1998 [MASS=35423]/Apurinic/apyrimidinic endonuclease 1, multifunctional DNA repair enzyme that coordinates the repair of abasic sites and repair synthesis, acts as a transcription regulator; mutations may correlate with inclusion body myositis and colorectal tumorigenesis</p>                                   |
| <p>SW:RFA3_HUMAN P35244 homo sapiens (human). replication protein a 14 kda subunit (rp-a) (rf-a) (replication factor-a protein 3). 11/1997 [MASS=13569]/Replication protein A 3, a subunit of replication protein A, which is a single-stranded DNA-binding protein complex with roles in DNA replication, repair, and recombination</p>                                                                                                                                                     |
| <p>PIR2:A57099 DNA-activated protein kinase, catalytic subunit - human [MASS=465428]/DNA-dependent protein kinase catalytic subunit, a DNA-binding protein kinase involved in DNA double-strand break repair and somatic recombination of antibody genes; absence of mouse Prkdc is associated with severe combined immunodeficiency</p>                                                                                                                                                     |
| <p>SW:MSH3_HUMAN P20585 homo sapien/Mismatch repair protein 3, dimerizes with MSH2 to form damaged-DNA recognition complex MutS beta, repairs short insertion-deletion loops (2-8 base pairs), may bind PCNA to effect repair, maintains stability of the genome and may suppress tumorss (human). dna mismatch repair protein msh3 (divergent upstream protein) (dup) (mismatch repair protein 1) (mrp1). 12/1998 [MASS=127384]</p>                                                         |

|                                                                                                                                                                                                                                                                                                                                                                                                                                 |
|---------------------------------------------------------------------------------------------------------------------------------------------------------------------------------------------------------------------------------------------------------------------------------------------------------------------------------------------------------------------------------------------------------------------------------|
| <p>SW:RFA1_HUMAN P27694 homo sapiens (human). replication protein a 70 kda dna-binding subunit (rp-a) (rf-a) (replication factor-a protein 1) (single-stranded dna-binding protein). 11/1997 [MASS=68138]/Replication protein A1 (70 kDa), a DNA replication factor A subunit, has roles in DNA replication, recombination, repair, may contribute to latent virus reactivation, inactivated by anti-cancer drug adozelesin</p> |
|                                                                                                                                                                                                                                                                                                                                                                                                                                 |
| <p>SW:RAN_HUMAN P17080 homo sapiens (human). gtp-binding nuclear protein ran (tc4). 12/1998 [MASS=24354]/RAN, member of the ras family of GTP binding proteins, couples completion of DNA synthesis to mitosis and induces mitotic spindle formation, involved in nuclear transport of RNA and proteins, interacts with polyglutamate repeats of the androgen receptor</p>                                                      |
| <p>SW:MCM3_HUMAN P25205 homo sapiens (human). dna replication licensing factor mcm3 (dna polymerase alpha holoenzyme-associated protein p1) (rif beta subunit) (p102 protein) (p1-mcm3). 5/2000 [MASS=90952]/Minichromosome maintenance deficient 3, associates with the DNA polymerase alpha-primase complex, involved in the initiation of DNA replication, selectively degraded during apoptosis</p>                         |
| <p>SW:NPL1_HUMAN P55209 homo sapiens (human). nucleosome assembly protein 1-like 1 (nap-1 related protein). 10/1996 [MASS=45374]/Nucleosome assembly protein 1-like 1, member of the NAP/SET protein family, binds histones H2A and H2B, a histone chaperone that mediates assembly of nucleosomes, complex with histone acetyltransferase coactivator p300 (EP300) may stimulate transcription</p>                             |
| <p>SW:RFA3_HUMAN P35244 homo sapiens (human). replication protein a 14 kda subunit (rp-a) (rf-a) (replication factor-a protein 3). 11/1997 [MASS=13569]/Replication protein A 3, a subunit of replication protein A, which is a single-stranded DNA-binding protein complex with roles in DNA replication, repair, and recombination</p>                                                                                        |
| <p>SW:MCM4_HUMAN P33991 homo sapiens (human). dna replication licensing factor mcm4 (cdc21 homolog) (p1-cdc21). 5/2000 [MASS=96611]/Minichromosome maintenance deficient 4, forms a single stranded ATP-dependent DNA helicase with MCM6 and MCM7, may monitor sites of unreplicated DNA, displacement from replicated chromatin may ensure that DNA is only replicated once per cell cycle</p>                                 |
| <p>SW:RFA1_HUMAN P27694 homo sapiens (human). replication protein a 70 kda dna-binding subunit (rp-a) (rf-a) (replication factor-a protein 1) (single-stranded dna-binding protein). 11/1997 [MASS=68138]/Replication protein A1 (70 kDa), a DNA replication factor A subunit, has roles in DNA replication, recombination, repair, may contribute to latent virus reactivation, inactivated by anti-cancer drug adozelesin</p> |
| <p>SW:PUR_HUMAN Q00577 homo sapiens (human). transcriptional activator protein pur-alpha (purine-rich single- stranded dna-binding protein alpha). 7/1998 [MASS=34911]/Purine rich element binding protein A, a single-stranded DNA-RNA binding protein implicated in the control of transcription and DNA replication; interacts with HIV Tat protein and JC virus T antigen to modulate host and viral gene expression</p>    |
|                                                                                                                                                                                                                                                                                                                                                                                                                                 |
| <p>GP:U35146_1 Human p56 protein kinase (KKIAMRE), complete cds; similar to human p42 KKIALRE gene, GenBank Accession Number X66358; these protein kinases have mutually exclusive expression in testis (p56 KKIAMRE) and ovary (p42 KKIALRE). [MASS=56019]/Cyclin-dependent kinase-like 2, putative protein kinase whose activity is stimulated by epidermal growth factor (EGF), may play a role in sex differentiation</p>   |
| <p>type-2 phosphatidic acid phosphatase alpha-1 /Phosphatidic acid phosphatase type 2a, catalyzes the dephosphorylation of various lipid phosphates, regulates the level of lipid phosphates which are involved in signal transduction</p>                                                                                                                                                                                      |
| <p>SW:HPS1_HUMAN P08910 homo sapiens (human). protein phps1-2. 11/1997 [MASS=48315]/Member of the alpha/beta hydrolase fold family, has a region with weak similarity to a region of <i>S. cerevisiae</i> Eht1p (alcohol acyl transferase)</p>                                                                                                                                                                                  |
| <p>GP:AB015019_1 Homo sapiens mRNA for BAP2-alpha protein, complete cds; BAI-associated protein 2(BAP2) -alpha; alternative splicing: see also AB015020. [MASS=57359]/Brain-specific angiogenesis inhibitor 1-associated protein 2, interacts with cytoplasmic portion of BAI1, may be a substrate for INSR, involved in cytoskeletal organization and lamellipodia and filopodia formation</p>                                 |
| <p>PIR2:A53016 myosin heavy chain VA - human (fragment) [MASS=96052]/Class V myosin (Myoxin), a member of the myosin family of proteins, a motor protein that may be involved in vesicle transport and epidermal differentiation; mutation of the corresponding gene is associated with Griscelli syndrome</p>                                                                                                                  |
| <p>GP:AF003521_1 Homo sapiens Jagged 2 mRNA, complete cds; ligand for Notch receptor; Contains EGF repeats and DSL domain. [MASS=133394]/Jagged 2, a Notch receptor ligand that may coordinate differentiation among progenitors adopting identical cell fates, plays a role in hair cell development in the cochlea</p>                                                                                                        |
| <p>SW:CLH2_HUMAN P53675 homo sapiens (human). clathrin heavy chain 2 (clh-22). 5/2000 [MASS=187030]/Clathrin heavy polypeptide-like 1, may play roles in vesicle budding and in cytoskeleton-dependent trans-Golgi network membrane sorting; gene is among those deleted in velocardiofacial and DiGeorge syndromes, and is a fusion partner with ALK in lymphoma</p>                                                           |
| <p>SW:HD_HUMAN P42858 homo sapiens (human). huntingtin (huntington's disease protein) (hd protein). 12/1998 [MASS=347860]/Huntingtin, antiapoptotic protein, may be involved in intracellular transport; mutations in the gene cause Huntington disease and result in the production of a protein that interferes with transcription and proteasome-mediated protein degradation</p>                                            |
| <p>GP:AB012191_1 Homo sapiens mRNA for Nedd8-conjugating enzyme hUbc12, complete cds. [MASS=20900]/Neurally expressed developmentally down-regulated 8, an ubiquitin-like protein that conjugates to CUL proteins to activate ubiquitin ligase complex dependent ubiquitination, possibly involved in cell cycle regulation</p>                                                                                                 |

|                                                                                                                                                                                                                                                                                                                                                                                                                                                                                    |
|------------------------------------------------------------------------------------------------------------------------------------------------------------------------------------------------------------------------------------------------------------------------------------------------------------------------------------------------------------------------------------------------------------------------------------------------------------------------------------|
| SW:RB3D_HUMAN O95716 homo sapiens (human). ras-related protein rab-3d. 5/2000 [MASS=24267]/Ras-related GTP-binding protein 3d, putative small monomeric GTP-binding protein and GTPase that plays a role in regulated secretion                                                                                                                                                                                                                                                    |
| SW:ITAV_HUMAN P06756 homo sapiens (human). vitronectin receptor alpha subunit precursor (integrin alpha-v) (cd51). 12/1998 [MASS=116052]/Alpha V subunit integrin, a subunit of the vitronectin receptor that is involved in cell-matrix interactions, chemotaxis, phagocytosis and angiogenesis, may contribute to the tumorigenicity of cutaneous malignant melanoma and invasive breast cancer                                                                                  |
| SW:DAG1_HUMAN Q14118 homo sapiens (human). dystroglycan precursor (dystrophin-associated glycoprotein 1) [contains: alpha-dystroglycan (alpha-dg); beta-dystroglycan (beta- dg)]. 5/2000 [MASS=97581]/Dystroglycan 1, component of a dystrophin-associated glycoprotein complex that binds laminin, may link the extracellular matrix and cytoskeleton, may play a role in synaptic function; deficiency is involved in the pathogenesis of muscular dystrophies                   |
| GP:AB011159_1 Homo sapiens mRNA for KIAA0587 protein, complete cds. [MASS=129517]/NCK-associated protein 1, may play a role in regulating beta secretase activity in processing of beta APP, and may play a role in suppressing apoptosis; downregulated in patients with sporadic Alzheimer disease                                                                                                                                                                               |
| SW:ITMA_HUMAN O43736 homo sapiens (human). integral membrane protein 2a (e25 protein). 5/2000 [MASS=29741]/Integral membrane protein 2, a putative type II integral membrane protein with a leucine zipper motif                                                                                                                                                                                                                                                                   |
| SW:UTRO_HUMAN P46939 homo sapiens (human). utrophin (dystrophin-related protein 1) (drp1) (drp). 7/1999 [MASS=394494]/Utrophin, a membrane-associated protein that interacts with cytoskeletal proteins, associated with muscle and neuromuscular junction development and cell adhesion, may partially compensate for dystrophin (DMD) deficiency in Duchenne's muscular dystrophy                                                                                                |
| SW:APP2_HUMAN Q06481 homo sapiens (human). amyloid-like protein 2 precursor (amyloid protein homolog) (apph) (cdeibox binding protein) (cdebp). 5/2000 [MASS=86956]/Amyloid precursor-like protein 2, a nuclear protein which may contribute to neurogenesis and cell cycle control                                                                                                                                                                                                |
| SW:ASAH_HUMAN Q13510 homo sapiens (human). acid ceramidase precursor (ec 3.5.1.23) (acylsphingosine deacylase) (n-acylsphingosine amidohydrolase) (ac) (putative 32 kda heart protein) (php32). 5/2000 [MASS=44650]/N-acylsphingosine amidohydrolase (acid ceramidase), catalyzes hydrolysis of ceramide to sphingosine and free fatty acid, inhibits apoptosis, upregulated in prostate cancer, deficiency is associated with Farber disease                                      |
| SW:TPIS_HUMAN P00938 homo sapiens (human), and pan troglodytes (chimpanzee). triosephosphate isomerase (ec 5.3.1.1) (tim). 7/1998 [MASS=26538]/Triosephosphate isomerase 1, catalyzes the reversible interconversion of glyceraldehyde 3-phosphate and dihydroxyacetone phosphate in glycolysis; variant forms cause hemolytic anemia and neurodegeneration; variant form is an antigen on melanoma cells                                                                          |
| SW:TDX1_HUMAN P32119 homo sapiens (human). thioredoxin peroxidase 1 (thioredoxin-dependent peroxide reductase 1) (thiol-specific antioxidant protein) (tsa) (prp) (natural killer cell enhancing factor b) [MASS=21892]/Peroxiredoxin 1, oxidative stress-inducible antioxidant protein with peroxidase activity, may have anticytotoxic and antiapoptotic activity and may have a role in cell proliferation                                                                      |
| GP:AB037819_1 Homo sapiens mRNA for KIAA1398 protein, partial cds; Start codon is not identified.. [MASS=170212]/Ribosome binding protein 1, a putative ribosome receptor, may play a role in protein biosynthesis, appears to be involved in cardiac development, may play a role in cardiac remodeling in heart failure                                                                                                                                                          |
| SW:KAP2_HUMAN P13861 homo sapiens (human). camp-dependent protein kinase type ii-alpha regulatory chain. 5/2000 [MASS=45387]/cAMP-dependent Protein kinase A regulatory subunit alpha (type II), binds A-kinase anchoring proteins to mediate holoenzyme localization and plays important roles in sperm motility and in trophoblast cell differentiation                                                                                                                          |
| SW:ERB2_HUMAN P04626 homo sapiens (human). receptor protein-tyrosine kinase erbB-2 precursor (ec 2.7.1.112) (p185erbB2) (neu proto-oncogene) (c-erbB-2) (tyrosine kinase-type cell surface receptor her2) [MASS=137910]/Avian erythroblastosis oncogene B 2, a receptor tyrosine kinase and most oncopotent member of the EGF receptor family, heterodimerizes with other EGFRs; overexpression contributes to growth, metastasis and chemoresistance of epithelial-derived tumors |
| SW:RAC1_HUMAN P15154 homo sapiens (human), mus musculus (mouse), and canis familiaris (dog). ras-related c3 botulinum toxin substrate 1 (p21-rac1) (ras-like protein tc25). 12/1998 [MASS=21450]/Ras-related C3 botulinum toxin substrate 1, a monomeric GTPase of the Rho family, involved in transducing signals that regulate proliferation, apoptosis, cytoskeletal organization, and response to oxidative stress, contributes to tumor cell invasiveness                     |
| SW:DESP_HUMAN P15924 homo sapiens (human). desmoplakin i and ii (dpi and dpii) (fragment). 5/2000 [MASS=201359]/Desmoplakin, a desmosomal plaque protein involved in cell adhesion and tumor migration, cleaved by caspases during desmosomal disruption associated with keratinocyte apoptosis; gene mutation is associated with hereditary palmoplantar keratoderma                                                                                                              |
| GP:AF308601_1 Homo sapiens NOTCH 2 (N2) mRNA, complete cds. [MASS=265404]/Notch (Drosophila) homolog 2, a transcriptional co-activator of the Notch family of receptors, interacts with MAML1, functions in apoptosis induction and possibly in skeletal development, constitutive activation may contribute to neoplastic transformation                                                                                                                                          |
| PIR2:JE0334 nuclear matrix protein NMP 238 - human [MASS=50228]/RuvB like 1, a member of the TIP49 family of proteins, a nuclear protein which contains ATPase-helicase motifs, may interact with the transactivation domain of c-myc (MYC)                                                                                                                                                                                                                                        |
| SW:PEBP_HUMAN P30086 homo sapiens (human). phosphatidylethanolamine-binding protein (pebp) (neuropolypeptide h3). 7/1999 [MASS=20926]/Phosphatidylethanolamine-binding protein, binds GTP, may regulate cAMP accumulation, enhance acetylcholine synthesis, and play a role in organizing phospholipids in the myelin sheath                                                                                                                                                       |



|                                                                                                                                                                                                                                                                                                                                                                                                                                                                                                 |
|-------------------------------------------------------------------------------------------------------------------------------------------------------------------------------------------------------------------------------------------------------------------------------------------------------------------------------------------------------------------------------------------------------------------------------------------------------------------------------------------------|
| <p>SW:GBI2_HUMAN P04899 homo sapiens (human). guanine nucleotide-binding protein g(i), alpha-2 subunit (adenylate cyclase-inhibiting g alpha protein). 12/1998 [MASS=40320]/G protein alpha subunit i2, a component of pertussis toxin sensitive heterotrimeric G protein complexes that transduces signals to effectors and inhibits adenylyl cyclase; mutations in the gene are associated with tachycardia and endocrine tumors</p>                                                          |
| <p>SW:A2HS_HUMAN P02765 homo sapiens (human). alpha-2-hs-glycoprotein precursor (fetuin) (alpha-2-z-globulin). 5/2000 [MASS=39325]/Alpha 2-HS-glycoprotein, inhibits insulin receptor (INSR) tyrosine kinase activity and may play roles in bone metabolism, monocyte recruitment, cell death, cell adhesion, and the immune response; genotype may be associated with osteoporosis and stature</p>                                                                                             |
| <p>GP:AF084523_1 Homo sapiens cellular repressor of E1A-stimulated genes CREG mRNA, complete cds. [MASS=24075]/Repressor of transcriptional activation and transformation by the adenovirus E1A protein, binds the general transcription factor TBP and the tumor suppressor pRb (RB1), involved in transcriptional control of cell growth and differentiation</p>                                                                                                                              |
| <p>SW:DYL1_HUMAN Q15701 homo sapiens (human), mus musculus (mouse), rattus norvegicus (rat), and oryctolagus cuniculus (rabbit). dynein light chain 1, cytoplasmic (protein inhibitor of neuronal nitric oxid [MASS=10366]/Dynein cytoplasmic light polypeptide (protein inhibitor of nitric oxide synthase), a component of the cytoplasmic dynein motor complex, inhibits neuronal nitric oxide synthase (NOS1), regulates the proapoptotic activity of BCL2-interacting protein BCL2L11</p>  |
| <p>SW:KAPA_HUMAN P17612 homo sapiens (human). camp-dependent protein kinase, alpha-catalytic subunit (ec 2.7.1.37) (pka c-alpha). 5/2000 [MASS=40458]/Catalytic subunit C alpha of cAMP-dependent protein kinase, plays a role in transcriptional regulation and may mediate suppression of apoptosis, may also serve as a tumor biomarker; alternative form C alpha 2 may play a role in sperm development</p>                                                                                 |
| <p>SW:ATC2_HUMAN P16615 h sarcoplasmic/endoplasmic reticulum calcium atpase isoform 2 (ec 3.6.1.38) (calcium pump 2) (serca2) (sr ca(2+)-atpase 2) (calcium- transporting atpase sarcoplasmic reticulum type, [MASS=114757]/Sarcoplasmic reticulum Ca2+-ATPase 2 (slow twitch muscle, cardiac, and nonmuscle form), pumps calcium from the cytoplasm to the ER; reduced activity in the heart is implicated in dilated cardiomyopathy and gene mutations are associated with Darier disease</p> |
| <p>SW:DDXY_HUMAN O15523 homo sapiens (human). dead box protein 3, y-chromosomal. 7/1999 [MASS=73095]/DEAD/H box polypeptide Y chromosome, a putative ATP-dependent RNA helicase, plays a role in spermatogenesis; deletion of the corresponding gene is associated with male infertility</p>                                                                                                                                                                                                    |
| <p>SW:SERA_HUMAN O43175 homo sapiens (human). d-3-phosphoglycerate dehydrogenase (ec 1.1.1.95) (pgdh). 7/1999 [MASS=56665]/3-phosphoglycerate dehydrogenase, enzyme that catalyzes the first step of serine biosynthesis which is the oxidation of 3-phosphoglycerate to 3-phosphohydroxypyruvate; mutation of the corresponding gene causes microcephaly, retardation, and seizures</p>                                                                                                        |
| <p>SW:R10A_HUMAN P53025 homo sapiens (human). 60s ribosomal protein l10a (csa-19). 10/1996 [MASS=24859]/Ribosomal protein L10a, a component of the large 60S ribosomal subunit; expression in the thymus is downregulated by cyclosporin-A</p>                                                                                                                                                                                                                                                  |
| <p>SW:OCRL_HUMAN Q01968 homo sapiens (human). lowe's oculocerebrorenal syndrome protein. 7/1998 [MASS=111485]/Oculocerebrorenal syndrome of Lowe, phosphatidylinositol-4,5-bisphosphate 5-phosphatase, may play a role in intracellular protein trafficking; mutation of the corresponding gene causes Lowe oculocerebrorenal syndrome</p>                                                                                                                                                      |
| <p>SW:VAB2_HUMAN P21281 homo sapiens (human). vacuolar atp synthase subunit b, brain isoform (ec 3.6.1.34) (endomembrane proton pump 58 kda subunit) (v-atpase b subunit) (ho57). 7/1999 [MASS=56517]/Vacuolar-type H(+)-ATPase (beta isoform 2), 56 kDa subunit of the ATPase catalytic domain which may assist in transepithelial H+ transport in the kidney, may effect vacuolar acidification, and may play a role in the polarization of osteoclasts</p>                                   |
| <p>SW:DHA4_HUMAN P51648 homo sapiens (human). fatty aldehyde dehydrogenase (ec 1.2.1.3) (aldehyde dehydrogenase, microsomal) (aldh class 3). 7/1999 [MASS=54848]/Aldehyde dehydrogenase 3 family member A2, catalyzes the oxidation of long chain fatty aldehydes and leukotrienes; mutation of the corresponding gene causes Sjogren Larsson syndrome, a disorder marked by mental retardation, spasticity, and ichthyosis</p>                                                                 |
| <p>SW:DDX1_HUMAN Q92499 homo sapiens (human). dead box protein 1 (dead box protein-retinoblastoma) (dbp-rb). 5/2000 [MASS=82432]/DEAD box protein 1, a member of the DEAD-H box ATP-dependent RNA helicase protein family, plays a role in the processing of pre-mRNAs, may interact with CSTF2; corresponding gene is coamplified with MYC in some neuroblastoma and retinoblastoma cell lines</p>                                                                                             |
| <p>PIR2:T09073 splicing factor Sip1 - human [MASS=128875]/Splicing factor arginine serine rich 2 interacting protein, a SR domain family protein that interacts with the RNA polymerase II C-terminal domain and several splicing factors, is essential in mRNA splicing and possibly spliceosome A-complex formation</p>                                                                                                                                                                       |
| <p>SW:MRP_HUMAN P49006 homo sapiens (human). marcks-related protein (mac-marcks). 12/1998 [MASS=19398]/Cysteine- and glycine-rich protein 3, a zinc-finger LIM domain protein that is an essential regulator of cardiac muscle development, expression is decreased in chronic heart failure</p>                                                                                                                                                                                                |
| <p>SW:NRP_HUMAN O14786 homo sapiens (human). neuropilin precursor (vascular endothelial cell growth factor 165 receptor). 5/2000 [MASS=103121]/Neuropilin 1, a receptor for VEGF (165) and the axonal chemorepellent Semaphorin III, involved in organogenesis, axon guidance and angiogenesis, may regulate cell proliferation and response to wounding, upregulated in neuroblastoma vascular endothelium</p>                                                                                 |

|                                                                                                                                                                                                                                                                                                                                                                                                                                                                  |
|------------------------------------------------------------------------------------------------------------------------------------------------------------------------------------------------------------------------------------------------------------------------------------------------------------------------------------------------------------------------------------------------------------------------------------------------------------------|
| SW:DDX5_HUMAN P17844 homo sapiens (human). probable rna-dependent helicase p68 (dead-box protein p68) (dead box protein 5). 7/1998 [MASS=69148]/DEAD/H (Asp-Glu-Ala-Asp/His) box polypeptide 5 (RNA helicase 68kD), a ATP-dependent RNA helicase that has ATP-independent RNA renaturation activity and catalyses branch migration, binds estrogen receptor alpha and function as a transcriptional coactivator                                                  |
| SW:GRBA_HUMAN Q13322 homo sapiens (human). growth factor receptor-bound protein 10 (grb10 adaptor protein) (insulin receptor binding protein grb-ir) (kiaa0207). 5/2000 [MASS=67231]/Growth factor receptor bound protein 10, an adaptor protein with PH and SH2 domains that binds to various receptor and cytosolic kinases and may mediate growth factor and Src family kinase signaling; variants may be associated with Russell-Silver Syndrome             |
| SW:ATCK_HUMAN P98194 homo sapiens (human). calcium-transporting atpase 2c1 (ec 3.6.1.38) (atp-dependent ca2+ pump pmr1). 5/2000 [MASS=100606]/ATPase (Ca2+ transporting) type 2c member 1, a Ca2+-transporting P-type ATPase involved in Ca2+ homeostasis that may also may play a role in epidermal differentiation; mutations in the gene cause Hailey-Hailey disease, a blistering skin disease                                                               |
| SW:FXR1_HUMAN P51114 homo sapiens (human). fragile x mental retardation syndrome related protein 1. 10/1996 [MASS=69692]/Fragile X mental retardation autosomal homolog 1, binds FMR1, associates with mRNPs and with 60S ribosomal subunits, may have a role in the ribosomal and RNA metabolism of neurons; identified as a scleroderma autoantigen processed during apoptosis                                                                                 |
| SW:SORC_HUMAN P30626 homo sapiens (human). sorcin (22 kda protein) (cp-22) (v19). 11/1997 [MASS=21676]/Sorcin, an EF-hand calcium-binding protein, may be involved in multidrug resistance, a potential modulator of intracellular calcium levels through interaction with the ryanodine receptor                                                                                                                                                                |
| SW:LAMA_HUMAN P02545 homo sapiens (human). lamin a (70 kda lamin). 5/2000 [MASS=74139]/Lamin A, a structural protein of the nuclear lamina; mutations of the corresponding gene are associated with Emery-Dreifuss muscular dystrophy and partial lipodystrophies                                                                                                                                                                                                |
| GP:AF002668_1 Homo sapiens putative fatty acid desaturase MLD mRNA, complete cds; putative fatty acid desaturase. [MASS=37866]/Degenerative spermatocyte homolog (Drosophila), member of the membrane fatty acid desaturase family, regulates the biosynthesis of the epidermal growth factor receptor (EGFR)                                                                                                                                                    |
| SW:LMG1_HUMAN P11047 homo sapiens (human). laminin gamma-1 chain precursor (laminin b2 chain). 7/1998 [MASS=177607]/Laminin C1, an extracellular matrix glycoprotein that may be involved in cell-matrix adhesion and the regulation of cell shape                                                                                                                                                                                                               |
| SW:UTX_HUMAN O15550 homo sapiens (human). ubiquitously transcribed x chromosome tetratricopeptide repeat protein (ubiquitously transcribed tpr protein on the x chromosome). 7/1999 [MASS=154232]/Protein that has very strong similarity to murine Utx, which contains tetratricopeptide repeats and is widely transcribed; corresponding gene is found on X chromosomes and escapes X-inactivation                                                             |
| SW:ACDV_HUMAN P49748 homo sapiens (human). acyl-coa dehydrogenase, very-long-chain specific, mitochondrial precursor (ec 1.3.99.-) (vlcad). 5/2000 [MASS=70390]/Very long chain acyl-coenzyme A dehydrogenase, oxidizes straight chain acyl-CoAs in the initial step of fatty acid beta-oxidation, severe deficiency results in infant cardiomyopathy with high mortality, mild deficiency results in hypoketotic hypoglycemia                                   |
| SW:PHS2_HUMAN P11217 homo sapiens (human). glycogen phosphorylase, muscle form (ec 2.4.1.1) (myophosphorylase). 5/2000 [MASS=97092]/Muscle glycogen phosphorylase, participates in glycogen catabolism; mutation of corresponding gene is associated with McArdle disease                                                                                                                                                                                        |
| SW:PHS3_HUMAN P11216 homo sapiens (human). glycogen phosphorylase, brain form (ec 2.4.1.1). 10/1996 [MASS=96683]/Brain glycogen phosphorylase, catalyzes the rate-limiting step in glycogen catabolism, activated by AMP and phosphorylation, may play a role in intestinal development; associated with gastric carcinomas displaying a differentiated intestinal phenotype                                                                                     |
| SW:GLYG_HUMAN P46976 homo sapiens (human). glycogenin-1 (ec 2.4.1.186). 7/1999 [MASS=37347]/Glycogenin (glycogenin glucosyltransferase), autocatalytic and self-glucosylating enzyme that primes de novo glycogen synthesis                                                                                                                                                                                                                                      |
| SW:NC5R_HUMAN P00387 homo sapiens (human). nadh-cytochrome b5 reductase (ec 1.6.2.2) (b5r). 11/1997 [MASS=34104]/NADH-dependent cytochrome b5 reductase (diaphorase), soluble erythrocyte-specific form functions in methemoglobin reduction, ubiquitous membrane-bound form functions in lipid metabolism; mutations in the gene cause methemoglobinemia types I and II                                                                                         |
| SW:GFA1_HUMAN Q06210 homo sapiens (human). glucosamine--fructose-6-phosphate aminotransferase [isomerizing] 1 (ec 2.6.1.16) (hexosephosphate aminotransferase 1) (d-fructose-6- phosphate amidotransferase [MASS=76616]/Glutamine-fructose-6-phosphate transaminase 1, catalyzes the first step in glucosamine formation, modulates glucose flux and functions in development of insulin resistance, upregulation in kidney associated with diabetic nephropathy |
| SW:UGS1_HUMAN P13807 homo sapiens (human). glycogen [starch] synthase, muscle (ec 2.4.1.11). 5/2000 [MASS=83786]/Glycogen synthase 1 (muscle), catalyzes transfer of a glucosyl residue from UDP-glucose to glycogen, stimulated by insulin, Acipimox and Flouxetine; mutations in the corresponding gene may be associated with non-insulin-dependent diabetes mellitus                                                                                         |

|                                                                                                                                                                                                                                                                                                                                                                                                                                                                                     |
|-------------------------------------------------------------------------------------------------------------------------------------------------------------------------------------------------------------------------------------------------------------------------------------------------------------------------------------------------------------------------------------------------------------------------------------------------------------------------------------|
| SW:WFS1_HUMAN O76024 homo sapiens (human). wolframin. 5/2000 [MASS=100306]/Wolfram syndrome 1 (wolframin), may play a role in islet beta cell and neuron survival, may influence normal hearing and vision; gene mutation is detected in Wolfram syndrome and some types of hearing loss and may influence type 2 diabetes susceptibility                                                                                                                                           |
| SW:G3P2_HUMAN P04406 homo sapiens (human). glyceraldehyde 3-phosphate dehydrogenase, liver (ec 1.2.1.12). 7/1999 [MASS=35922]/Glyceraldehyde-3-phosphate dehydrogenase, catalyzes reversible oxidation and phosphorylation of glyceraldehyde-3-phosphate to 1,3-diphosphoglycerate in glycolysis, involved in apoptosis, may play a role in neurodegeneration in diseases like Alzheimer's                                                                                          |
| SW:ENOB_HUMAN P13929 homo sapiens (human). beta enolase (ec 4.2.1.11) (2-phospho-d-glycerate hydro-lyase) (skeletal muscle enolase) (mse). 7/1998 [MASS=46856]/Enolase 3 (muscle-specific enolase, beta enolase), a putative enolase which catalyzes the conversion of 2-phospho-D-glycerate to phosphoenolpyruvate in muscle glycolysis, deficiency is associated with exercise intolerance and myalgias                                                                           |
| SW:KCRB_HUMAN P12277 homo sapiens (human). creatine kinase, b chain (ec 2.7.3.2) (b-ck). 7/1999 [MASS=42644]/Brain creatine kinase, involved in energy homeostasis, expression is elevated in some forms of cancer; CK-MB is a dimer of subunits CKM and CKB, and is an important serum marker for acute myocardial infarction                                                                                                                                                      |
| SW:GDE_HUMAN P35573 homo sapiens (human). glycogen debranching enzyme (glycogen debrancher) [includes: 4-alpha-glucanotransferase (ec 2.4.1.25) (oligo-1,4-1,4-glucontransferase); amylo-1,6-glucosidase [MASS=172497]/Glycogen debranching enzyme, (amylo-1,6-glucosidase 4-alpha-glucontransferase), catalyzes glycantransferase and glucosidase activities required for glycogen degradation; mutations and dysregulation are associated with type III glycogen storage diseases |
| SW:PGK1_HUMAN P00558 homo sapiens (human). phosphoglycerate kinase 1 (ec 2.7.2.3) (primer recognition protein 2) (prp 2). 7/1999 [MASS=44597]/Phosphoglycerate kinase 1, catalyzes conversion of 1,3-diphosphoglycerate to 3-phosphoglycerate in glycolysis, forming one molecule of ATP; PGK1 gene transcription is induced by hypoxia and mutation is associated with non-spherocytic hemolytic anemia                                                                            |
| SW:ODO1_HUMAN Q02218 homo sapiens (human). 2-oxoglutarate dehydrogenase e1 component, mitochondrial precursor (ec 1.2.4.2) (alpha-ketoglutarate dehydrogenase). 7/1999 [MASS=113475]/2-Oxoglutarate dehydrogenase (alpha-ketoglutarate dehydrogenase), E1 component of the complex that converts alpha-ketoglutarate to succinyl coenzyme A in the Krebs cycle; deficiency has been observed in Alzheimer and Parkinson disease                                                     |
| SW:K6PL_HUMAN P17858 homo sapiens (human). 6-phosphofruktokinase, liver type (ec 2.7.1.11) (phosphofruktokinase 1) (phosphohexokinase) (phosphofructo-1-kinase isozyme b). 10/1996 [MASS=85148]/Liver phosphofruktokinase, catalyses the phosphorylation of fructose-6-phosphate to fructose-1,6-bisphosphate in glycolysis, deficiency is linked to glycogenesis type VII while overexpression may lead to the cognitive disabilities of Down's syndrome                           |
| SW:KPB1_HUMAN P46020 homo sapiens (human). phosphorylase b kinase alpha regulatory chain, skeletal muscle isoform (phosphorylase kinase alpha m subunit). 2/1996 [MASS=137338]/Phosphorylase kinase regulatory subunit alpha-1 (muscle), which phosphorylates and thereby activates muscle-specific glycogen phosphorylase (PYGM); mutations in the corresponding gene are associated with muscle glycogenesis, a glycogen storage disease                                          |
| SW:TPIS_HUMAN P00938 homo sapiens (human), and pan troglodytes (chimpanzee). triosephosphate isomerase (ec 5.3.1.1) (tim). 7/1998 [MASS=26538]/Triosephosphate isomerase 1, catalyzes the reversible interconversion of glyceraldehyde 3-phosphate and dihydroxyacetone phosphate in glycolysis; variant forms cause hemolytic anemia and neurodegeneration; variant form is an antigen on melanoma cells                                                                           |
| SW:ENOA_HUMAN P06733 homo sapiens (human). alpha enolase (ec 4.2.1.11) (2-phospho-d-glycerate hydro-lyase) (non-neural enolase) (nne) (phosphopyruvate hydratase). 7/1998 [MASS=47038]/Enolase 1 (alpha enolase), converts 2-phospho-D-glycerate to phosphoenolpyruvate in glycolysis, an autoantigen in multiple autoimmune diseases, shorter alternative form c-myc promoter binding protein (MPB1) is a transcriptional repressor                                                |
| GP:AJ131612_1 Homo sapiens dic gene, exons 1-11. [MASS=31325]/Solute carrier family 25 member 10 (dicarboxylate carrier), a putative dicarboxylic acid transporter predicted to reside in the inner mitochondrial membrane, may be involved in gluconeogenesis                                                                                                                                                                                                                      |
| SW:ODPB_HUMAN P11177 homo sapiens (human). pyruvate dehydrogenase e1 component beta subunit, mitochondrial precursor (ec 1.2.4.1) (pdhe1-b). 7/1999 [MASS=39219]/E1 beta subunit of pyruvate dehydrogenase complex, oxidatively decarboxylates pyruvate to acetyl-CoA                                                                                                                                                                                                               |
| SW:HEMZ_HUMAN P22830 homo sapiens (human). ferrochelate precursor (ec 4.99.1.1) (protoheme ferro-lyase) (heme synthetase). 12/1998 [MASS=47834]/Ferrochelate precursor (protoheme ferrochelate), catalyzes the final step in the heme biosynthetic pathway by inserting ferrous iron into protoporphyrin IX to form heme; reduced activity and mutations in the corresponding gene are associated with protoporphyria                                                               |
| SW:H XK1_HUMAN P19367 homo sapiens (human). hexokinase, type i (ec 2.7.1.1) (hk i) (brain form hexokinase). 12/1998 [MASS=102503]/Hexokinase Type I (ATP:D-hexose 6-phosphotransferase), catalyzes ATP-dependent conversion of glucose to glucose 6 phosphate in glycolysis, deficiency may lead to non-spherocytic hemolytic anemia                                                                                                                                                |
| SW:CPT2_HUMAN P23786 homo sapiens (human). carnitine o-palmitoyltransferase ii, mitochondrial precursor (ec 2.3.1.21) (cpt ii). 5/2000 [MASS=73777]/Carnitine palmitoyltransferase II, a mitochondrial long-chain fatty acid oxidation enzyme; mutations are associated with a lipid metabolism disorder that includes recurrent myopathy with progressive rhabdomyolysis, muscle weakness and myoglobinuria                                                                        |

|                                                                                                                                                                                                                                                                                                                                                                                                                                                                                  |
|----------------------------------------------------------------------------------------------------------------------------------------------------------------------------------------------------------------------------------------------------------------------------------------------------------------------------------------------------------------------------------------------------------------------------------------------------------------------------------|
| <p>SW:KPY1_HUMAN P14618 homo sapiens (human). pyruvate kinase, m1 isozyme (ec 2.7.1.40) (pyruvate kinase muscle isozyme) (cytosolic thyroid hormone-binding protein) (cthbp) (thbp1). 12/1998 [MASS=57747]/Pyruvate kinase muscle (pyruvate kinase 3), glycolytic enzyme that converts phosphoenolpyruvate to pyruvate with phosphorylation of ADP to ATP, exists as M1 and M2 alternative forms, may have roles in viral transformation and cell differentiation</p>            |
| <p>SW:FLRE_HUMAN P30043 homo sapiens (human). flavin reductase (ec 1.6.99.1) (flr) (nadph-dependent diaphorase) (nadph-flavin reductase) (flr) (biliverdin reductase b) (ec 1.3.1.24) (bvr-b) (biliverdin-ix b [MASS=21988]/Biliverdin-IX beta reductase (NADPH-flavin reductase), catalyzes the conversion of biliverdin-IX beta to bilirubin-IX beta, the major heme catabolite produced during early fetal development; also has NAD(P)H-linked flavin reductase activity</p> |
| <p>SW:COXS_HUMAN Q14061 homo sapiens (human). cytochrome c oxidase copper chaperone. 7/1999 [MASS=6784]/Cytochrome c oxidase assembly protein 17, a putative copper binding protein, may function to transport copper to mitochondria for assembly into cytochrome oxidase complex; mutation does not appear to be a common cause of COX deficiency disorders</p>                                                                                                                |
| <p>SW:INSR_HUMAN P06213 homo sapiens (human). insulin receptor precursor (ec 2.7.1.112) (ir). 5/2000 [MASS=156281]/Insulin receptor, a transmembrane receptor protein tyrosine kinase involved in carbohydrate metabolism, energy pathways, and cell growth; gene mutation is associated with insulin-resistant diabetes mellitus and leprechaunism</p>                                                                                                                          |
| <p>SW:THIK_HUMAN P09110 homo sapiens (human). 3-ketoacyl-coa thiolase, peroxisomal precursor (ec 2.3.1.16) (beta-ketothiolase) (acetyl-coa acyltransferase) (peroxisomal 3-oxoacyl-coa thiolase). 7/1999 [MASS=44292]/Peroxisomal 3-oxoacyl-coenzyme A thiolase (peroxisomal 3-ketoacyl-Coenzyme A thiolase), functions in peroxisomal beta-oxidation of fatty acids, deficiency is associated with rhizomelic chondrodysplasia punctata (RCDP)</p>                              |
| <p>SW:MDHC_HUMAN P40925 homo sapiens (human). malate dehydrogenase, cytoplasmic (ec 1.1.1.37). 5/2000 [MASS=36295]/Cytosolic malate dehydrogenase, part of the malate-aspartate shuttle where it putatively catalyzes the reduction of oxaloacetate to malate</p>                                                                                                                                                                                                                |
| <p>SW:ACON_HUMAN Q99798 homo sapiens (human). aconitate hydratase, mitochondrial precursor (ec 4.2.1.3) (citrate hydrolyase) (aconitase). 5/2000 [MASS=85425]/Aconitase 2 mitochondrial (aconitate hydratase), catalyzes the conversion of citrate to cis-aconitate in the tricarboxylic acid cycle, may be involved in iron homeostasis; deficiency may be associated with lifelong exercise intolerance</p>                                                                    |
| <p>SW:CPT1_HUMAN P50416 homo sapiens (human). carnitine o-palmitoyltransferase i, mitochondrial liver isoform (ec 2.3.1.21) (cpt i) (cpti-l). 7/1999 [MASS=88429]/Liver carnitine palmitoyltransferase I, enzyme of long-chain fatty acid beta-oxidation pathway; mutations in the corresponding gene are associated with carnitine palmitoyltransferase I deficiency</p>                                                                                                        |
| <p>SW:D3D2_HUMAN P42126 homo sapiens (human). 3,2-trans-enoyl-coa isomerase, mitochondrial precursor (ec 5.3.3.8) (dodecenyol-coa delta-isomerase). 7/1999 [MASS=32816]/Dodecenyol-Coenzyme A delta isomerase (3,2 trans-enoyl-Coenzyme A isomerase), catalyzes the isomerization of 3-cis and 3-trans enoyl CoA esters to 2-trans enoyl CoA esters, functions in mitochondrial beta-oxidation of unsaturated fatty acids</p>                                                    |
| <p>PIR2:JC5938 thioredoxin-like protein - human [MASS=32251]/Thioredoxin-like 32, a thioredoxin related protein that has thioredoxin-like reducing activity</p>                                                                                                                                                                                                                                                                                                                  |
| <p>SW:ECH1_HUMAN Q13011 homo sapiens (human). delta3,5-delta2,4-dienoyl-coa isomerase precursor (ec 5.3.3.-). 7/1999 [MASS=35994]/Enoyl Coenzyme A hydratase 1 (peroxisomal), putative enzyme that may play a role in peroxisomal beta-oxidation</p>                                                                                                                                                                                                                             |
| <p>SW:KG3B_HUMAN P49841 homo sapiens (human). glycogen synthase kinase-3 beta (ec 2.7.1.37) (gsk-3 beta). 7/1999 [MASS=46768]/Glycogen synthase kinase-3 beta, a serine threonine protein kinase that phosphorylates several cytoplasmic and nuclear proteins, involved in embryonic development, and may hyperphosphorylate tau (MAPT) in</p>                                                                                                                                   |
| <p>SW:KCRU_HUMAN P12532 homo sapiens (human). creatine kinase, ubiquitous mitochondrial precursor (ec 2.7.3.2) (u-mtck) (mia-ck) (acidic-type mitochondrial creatine kinase). 7/1999 [MASS=47037]/Mitochondrial creatine kinase 1 (ubiquitous), mitochondrial isoform that has a probable role in the phosphocreatine shuttle, plays a role in energy pathways; inactivation is involved in anthracycline cardiotoxicity</p>                                                     |
| <p>SW:ACPM_HUMAN O14561 homo sapiens (human). acyl carrier protein, mitochondrial precursor (acp) (nadh-ubiquinone oxidoreductase 9.6 kda subunit) (ec 1.6.5.3) (ec 1.6.99.3) (ci-sdap). 5/2000 [MASS=14806]/NADH-ubiquinone oxidoreductase subunit of alpha-beta subcomplex 1 (8 kD), a probable acyl carrier component of the multiprotein complex that transports electrons from NADH to ubiquinone, present within the hydrophobic fraction of complex I</p>                 |
| <p>SW:OBGR_HUMAN O15243 homo sapiens (human). leptin receptor gene-related protein (ob-r gene related protein) (ob-rgrp). 7/1999 [MASS=14254]/Leptin receptor, member of the gp130 (IL6ST) cytokine-receptor family, signals through the JAK/STAT cascade and functions in regulation of appetite, body fat, bone formation, and reproduction; mutations in the gene cause obesity and pituitary dysfunction</p>                                                                 |
| <p>SW:CAOP_HUMAN Q15067 homo sapiens (human). acyl-coenzyme a oxidase, peroxisomal (ec 1.3.3.6) (palmitoyl-coa oxidase) (aox). 11/1997 [MASS=74502]/Peroxisomal acyl-coenzyme A oxidase, catalyzes the first step in very long chain fatty acid beta-oxidation, desaturates acyl-CoA to 2-trans-enoyl-CoA and produces hydrogen peroxide</p>                                                                                                                                     |
| <p>SW:APE1_HUMAN P27695 homo sapiens (human). dna-(apurinic or apyrimidinic site) lyase (ec 4.2.99.18) (ap endonuclease 1) (apex nuclease) (apen) (ref-1 protein). 12/1998 [MASS=35423]/Apurinic/apyrimidinic endonuclease 1, multifunctional DNA repair enzyme that coordinates the repair of abasic sites and repair synthesis, acts as a transcription regulator; mutations may correlate with inclusion body myositis and colorectal tumorigenesis</p>                       |

|                                                                                                                                                                                                                                                                                                                                                                                                                                                                            |
|----------------------------------------------------------------------------------------------------------------------------------------------------------------------------------------------------------------------------------------------------------------------------------------------------------------------------------------------------------------------------------------------------------------------------------------------------------------------------|
| SW:DLDH_HUMAN P09622 homo sapiens (human). dihydroliipoamide dehydrogenase, mitochondrial precursor (ec 1.8.1.4). 5/2000 [MASS=54150]/Dihydroliipoamide dehydrogenase, E3 component of pyruvate dehydrogenase complex, also component of alpha-ketoglutarate dehydrogenase and branched-chain alpha-ketoacid dehydrogenase complexes and the glycine cleavage system                                                                                                       |
| SW:CISY_HUMAN O75390 homo sapiens (human). citrate synthase, mitochondrial precursor (ec 4.1.3.7). 7/1999 [MASS=51706]/Citrate synthase, converts acetyl-CoA and oxaloacetate into citrate plus CoA in the tricarboxylic acid cycle                                                                                                                                                                                                                                        |
| SW:ADRO_HUMAN P22570 homo sapiens (human). nadph:adrenodoxin oxidoreductase precursor (ec 1.18.1.2) (adrenodoxin reductase) (ferredoxin-nadp+) reductase. 7/1999 [MASS=53809]/Ferredoxin reductase, mitochondrial flavoprotein that mediates electron transport from NADPH to cytochrome P450scc                                                                                                                                                                           |
| SW:ADT1_HUMAN P12235 homo sapiens (human). adp.atp carrier protein, heart/skeletal muscle isoform t1 (adp/atp translocase 1) (adenine nucleotide translocator 1) (ant 1). 10/1994 [MASS=33064]/Solute carrier family 25 member 4, an ADP:ATP transporter that may act in mitochondrial genome stability, altered transport capacity due to autoimmune response leads to myocarditis and cardiomyopathy; mutation causes progressive external ophthalmoplegia               |
| SW:NUAM_HUMAN P28331 homo sapiens (human). nadh-ubiquinone oxidoreductase 75 kda subunit precursor (ec 1.6.5.3) (ec 1.6.99.3) (complex i-75kd) (ci-75kd). 7/1999 [MASS=79574]/NADH-dehydrogenase ubiquinone Fe-S protein 1 (75kD), a multiprotein complex that transports electrons from NADH to ubiquinone, present within the hydrophobic fraction of complex I; genetic variants are associated with mitochondrial complex I deficiency                                 |
| SW:ECHB_HUMAN P55084 homo sapiens (human). trifunctional enzyme beta subunit, mitochondrial precursor (tp-beta) [includes: 3-ketoacyl-coa thiolase (ec 2.3.1.16) (acetyl-coa acyltransferase) (beta-ketothi [MASS=51294]/3-hydroxyacyl-CoA dehydrogenase, 3-ketoacyl-CoA thiolase trifunctional protein beta subunit, involved in fatty acid beta-oxidation; variants are associated with trifunctional protein deficiency, sudden infant death syndrome and liver failure |
| SW:LYAG_HUMAN P10253 homo sapiens (human). lysosomal alpha-glucosidase precursor (ec 3.2.1.20) (acid maltase). 5/2000 [MASS=105338]/Acid alpha-glucosidase, lysosomal alpha-glucosidase that hydrolyzes alpha(1->4) and alpha(1->6) linkages in glycogen during glycogen catabolism; heritable deficiency causes glycogenosis type II or Pompe disease                                                                                                                     |
| SW:COX1_HUMAN P00395 homo sapiens (human). cytochrome c oxidase polypeptide i (ec 1.9.3.1). 5/2000 [MASS=57041]/Mitochondrial cytochrome c oxidase subunit I, a subunit of complex IV of the mitochondrial respiratory chain; mutations in the corresponding gene may be associated with mitochondrial diseases and acquired idiopathic sideroblastic anemia                                                                                                               |
| SW:ECHA_HUMAN P40939 homo sapiens (human). mitochondrial trifunctional enzyme alpha subunit precursor (tp-alpha) [includes: long-chain enoyl-coa hydratase (ec 4.2.1.17); long chain 3-hydroxyacyl-coa deh [MASS=82960]/Mitochondrial long-chain enoyl-CoA hydratase/3-hydroxyacyl-CoA dehydrogenase/3-ketoacyl-CoA thiolase alpha subunit, involved in fatty acid beta-oxidation, mutations are associated with trifunctional protein deficiency and Reye-like syndrome   |
| SW:ETFB_HUMAN P38117 homo sapiens (human). electron transfer flavoprotein beta-subunit (beta-ETF). 5/2000 [MASS=27844]/Electron transfer flavoprotein beta subunit, shuttles electrons between primary flavoprotein dehydrogenases involved in mitochondrial fatty acid metabolism and ubiquinone oxidoreductase; genetic variants are associated with type II glutaric acidemia                                                                                           |
| PIR2:B53737 phosphate carrier protein precursor, mitochondrial, splice form B - human [MASS=39959]/Mitochondrial phosphate carrier (solute carrier family 25 member 3), catalyzes the transport of phosphate from the cytoplasm to the mitochondrial matrix for ATP synthesis during oxidative phosphorylation                                                                                                                                                             |
| SW:IDHP_HUMAN P48735 homo sapiens (human). isocitrate dehydrogenase [nadp], mitochondrial precursor (ec 1.1.1.42) (oxalosuccinate decarboxylase) (idh) (nadp+-specific icdh) (idp) (icd-m). 2/1996 [MASS=50948]/Isocitrate dehydrogenase 2 (NADP+) mitochondrial, catalyzes the oxidative decarboxylation of isocitrate to form alpha-ketoglutarate                                                                                                                        |
| SW:CY1_HUMAN P08574 homo sapiens (human). cytochrome c1, heme protein precursor. 7/1999 [MASS=35390]/Cytochrome c1, a member of the cytochrome bc1 complex                                                                                                                                                                                                                                                                                                                 |
| SW:NUPM_HUMAN P51970 homo sapiens (human). nadh-ubiquinone oxidoreductase 19 kda subunit (ec 1.6.5.3) (ec 1.6.99.3) (complex i-19kd) (ci-19kd) (complex i-pgmv) (ci-pgmv). 5/2000 [MASS=19974]/NADH dehydrogenase ubiquinone 1 alpha subcomplex 8 (19 kDa), a subunit of NADH-ubiquinone oxidoreductase (complex I), a multiprotein complex that transports electrons from NADH to ubiquinone                                                                              |
| SW:KC2B_HUMAN P13862 homo sapiens (human), mus musculus (mouse), rattus norvegicus (rat), bos taurus (bovine), sus scrofa (pig), oryctolagus cuniculus (rabbit), and gallus gallus (chicken). casein kinase [MASS=24942]/Casein kinase II beta subunit, regulatory subunit of casein kinase II (CK2), confers stability and specificity to CK2 catalytic subunits, may mediate formation of the tetrameric CK2 complex, and may be involved in heat stress response        |
| SW:ATPG_HUMAN P36542 homo sapiens (human). atp synthase gamma chain, mitochondrial precursor (ec 3.6.1.34). 5/2000 [MASS=32996]/ATP synthase H+ transporting mitochondrial F1 complex gamma 1, putative component of multisubunit enzyme that synthesizes ATP during oxidative phosphorylation, exists in tissue-specific alternative forms that are spliced in response to acidic conditions                                                                              |

|                                                                                                                                                                                                                                                                                                                                                                                                                                                                   |
|-------------------------------------------------------------------------------------------------------------------------------------------------------------------------------------------------------------------------------------------------------------------------------------------------------------------------------------------------------------------------------------------------------------------------------------------------------------------|
| SW:NUBM_HUMAN P49821 homo sapiens (human). nadh-ubiquinone oxidoreductase 51 kda subunit precursor (ec 1.6.5.3) (ec 1.6.99.3) (complex i-51kd) (ci-51kd). 5/2000 [MASS=50956]/NADH dehydrogenase ubiquinone flavoprotein 1 (51 kDa), a subunit of NADH-ubiquinone oxidoreductase (Complex I); genetic variants are associated with mitochondrial complex I deficiency, leukodystrophy, and myoclonic epilepsy                                                     |
| SW:UCR1_HUMAN P31930 homo sapiens (human). ubiquinol-cytochrome c reductase complex core protein i precursor (ec 1.10.2.2). 7/1999 [MASS=52619]/Ubiquinol-cytochrome c reductase core protein I, a subunit of the ubiquinol-cytochrome c oxidoreductase component of the mitochondrial respiratory chain, may function as an electron transporter in aerobic respiration and oxidative phosphorylation                                                            |
| SW:DHSB_HUMAN P21912 homo sapiens (human). succinate dehydrogenase [ubiquinone] iron-sulfur protein, mitochondrial precursor (ec 1.3.5.1) (ip) (ip subunit of complex ii). 5/2000 [MASS=31629]/Succinate dehydrogenase complex iron sulfur subunit B, part of an enzyme complex that transports electrons from succinate to ubiquinone in the TCA cycle and aerobic respiratory chain, may be involved in familial pheochromocytoma                               |
| SW:NB8M_HUMAN P17568 homo sapiens (human). nadh-ubiquinone oxidoreductase b18 subunit (ec 1.6.5.3) (ec 1.6.99.3) (complex i-b18) (ci-b18) (cell adhesion protein sqm1). 7/1998 [MASS=15648]/Subunit of the NADH-ubiquinone oxidoreductase (complex I), a multiprotein complex that transports electrons from NADH to ubiquinone, functions as a cell adhesion molecule with a role in metastasis, may have a role in drug transport                               |
| SW:MDHM_HUMAN P40926 homo sapiens (human). malate dehydrogenase, mitochondrial precursor (ec 1.1.1.37). 5/2000 [MASS=35531]/Mitochondrial malate dehydrogenase, part of the malate-aspartate shuttle where it putatively catalyzes the oxidation of malate to oxaloacetate                                                                                                                                                                                        |
| SW:UCRH_HUMAN P07919 homo sapiens (human). ubiquinol-cytochrome c reductase complex 11 kda protein precursor (ec 1.10.2.2) (mitochondrial hinge protein) (cytochrome c1, nonheme 11 kda protein) (complex [MASS=10755]/Ubiquinol-cytochrome c reductase hinge protein, hinges cytochrome c with cytochrome c1 in the mitochondrial respiratory chain, may function to accelerate apoptosis by enhancing cytochrome c release from the mitochondria                |
| SW:ETFA_HUMAN P13804 homo sapiens (human). electron transfer flavoprotein alpha-subunit precursor (alpha-ETF). 5/2000 [MASS=35080]/Electron transfer flavoprotein alpha subunit, shuttles electrons between flavoprotein dehydrogenases of mitochondrial fatty acid metabolism and ubiquinone oxidoreductase, deficiency associated with Type II glutaricaciduria                                                                                                 |
| SW:ATPA_HUMAN P25705 homo sapiens (human). atp synthase alpha chain, mitochondrial precursor (ec 3.6.1.34). 12/1998 [MASS=59751]/ATP synthase H+ transporting mitochondrial F1 complex alpha subunit isoform 1 cardiac muscle, part of the synthase enzymatic complex that catalyzes the synthesis of ATP during oxidative phosphorylation                                                                                                                        |
| SW:UCR2_HUMAN P22695 homo sapiens (human). ubiquinol-cytochrome c reductase complex core protein 2 precursor (ec 1.10.2.2) (complex iii subunit ii). 7/1999 [MASS=48470]/Ubiquinol-cytochrome c reductase core protein II, a putative ubiquinol-cytochrome c reductase subunit of the mitochondrial cytochrome bc1 complex, likely to play a role in oxidative phosphorylation, may be involved in aerobic respiration                                            |
| SW:THIL_HUMAN P24752 homo sapiens (human). acetyl-coa acetyltransferase, mitochondrial precursor (ec 2.3.1.9) (acetoacetyl-coa thiolase) (t2). 7/1999 [MASS=45200]/Acetyl-Coenzyme A acetyltransferase 1 (mitochondrial acetoacetyl-coenzyme A thiolase); mutations in the corresponding gene are associated with 3-ketothiolase deficiency                                                                                                                       |
| SW:UCRI_HUMAN P47985 homo sapiens (human). ubiquinol-cytochrome c reductase iron-sulfur subunit, mitochondrial precursor (ec 1.10.2.2) (rieske iron-sulfur protein) (risp). 7/1999 [MASS=29652]/Ubiquinol-cytochrome c reductase Rieske iron-sulfur polypeptide 1, a subunit of cytochrome bc1 complex, which transfers electron from ubiquinol to cytochrome c, located in the mitochondrion; deficient mitochondrial uptake may cause mitochondrial myopathy    |
| SW:PPCM_HUMAN Q16822 homo sapiens (human). phosphoenolpyruvate carboxykinase, mitochondrial precursor [gtp] (ec 4.1.1.32) (phosphoenolpyruvate carboxylase) (pepck-m). 7/1999 [MASS=70637]/Phosphoenolpyruvate carboxykinase 2, catalyzes the formation of phosphoenolpyruvate by decarboxylation of oxaloacetate, rate-limiting step of gluconeogenesis                                                                                                          |
| SW:DHSA_HUMAN P31040 homo sapiens (human). succinate dehydrogenase [ubiquinone] flavoprotein subunit, mitochondrial precursor (ec 1.3.5.1) (fp) (flavoprotein subunit of complex ii). 5/2000 [MASS=72692]/Succinate dehydrogenase complex subunit A (flavoprotein), transports electrons from succinate to ubiquinone in the TCA cycle and respiratory chain; gene mutation is associated with Leigh syndrome, which is a complex II respiratory chain deficiency |
| SW:ADT2_HUMAN P05141 homo sapiens (human). adp,atp carrier protein, fibroblast isoform (adp/atp translocase 2) (adenine nucleotide translocator 2) (ant 2). 7/1999 [MASS=32895]/Solute carrier family 25 member 5 (adenine nucleotide translocator 2), may mediate the exchange of ADP and ATP between the cytosol and mitochondria, expression is altered in dilated cardiomyopathy                                                                              |
| SW:ADT3_HUMAN P12236 homo sapiens (human). adp,atp carrier protein, liver isoform t2 (adp/atp translocase 3) (adenine nucleotide translocator 3) (ant 3). 11/1995 [MASS=32866]/Solute carrier family 25 member 6 (adenine nucleotide translocator), member of the ADP/ATP translocase family                                                                                                                                                                      |
| SW:ATPQ_HUMAN O75947 homo sapiens (human). atp synthase d chain, mitochondrial (ec 3.6.1.34). 5/2000 [MASS=18360]/Protein with high similarity to subunit d of the mitochondrial H(+)-ATP synthase (rat Atp5jd), which is part of a multisubunit enzyme that catalyzes the synthesis of ATP during oxidative phosphorylation                                                                                                                                      |

|                                                                                                                                                                                                                                                                                                                                                                                                                                                                                              |
|----------------------------------------------------------------------------------------------------------------------------------------------------------------------------------------------------------------------------------------------------------------------------------------------------------------------------------------------------------------------------------------------------------------------------------------------------------------------------------------------|
| <p>SW:NIPM_HUMAN O43920 homo sapiens (human). nadh-ubiquinone oxidoreductase 15 kda subunit (ec 1.6.5.3) (ec 1.6.99.3) (complex i-15 kda) (ci-15 kda). 7/1999 [MASS=12386]/NADH dehydrogenase Fe-S protein 5 (15kD) (NADH-coenzyme Q reductase), putative subunit of NADH-ubiquinone oxidoreductase (complex I), a multiprotein complex that transports electrons from NADH to ubiquinone in the mitochondrial respiratory chain</p>                                                         |
| <p>SW:COXG_HUMAN P14854 homo sapiens (human). cytochrome c oxidase polypeptide vib (ec 1.9.3.1) (aed). 11/1997 [MASS=10061]/Cytochrome c oxidase subunit V1b, a putative subunit of cytochrome C oxidase, which couples reduction of oxygen with proton translocation during oxidative phosphorylation</p>                                                                                                                                                                                   |
|                                                                                                                                                                                                                                                                                                                                                                                                                                                                                              |
| <p>SW:FDFT_HUMAN P37268 homo sapiens (human). farnesyl-diphosphate farnesyltransferase (ec 2.5.1.21) (squalene synthetase) (sqs) (ss) (fpp:fpp farnesyltransferase). 10/1996 [MASS=48115]/Squalene synthase (farnesyl-diphosphate farnesyltransferase 1), catalyzes the conversion of farnesyl diphosphate to squalene in cholesterol biosynthesis, may be a potential target for cholesterol lowering therapy</p>                                                                           |
| <p>type-2 phosphatidic acid phosphatase alpha-1 /Phosphatidic acid phosphatase type 2a, catalyzes the dephosphorylation of various lipid phosphates, regulates the level of lipid phosphates which are involved in signal transduction</p>                                                                                                                                                                                                                                                   |
| <p>fatty-acid-Coenzyme A ligase, long-chain 3 /Fatty acid Coenzyme A ligase long chain 3, a putative long-chain fatty-acyl-CoA synthetase that may function in lipid synthesis and fatty acid degradation</p>                                                                                                                                                                                                                                                                                |
| <p>SW:ACDV_HUMAN P49748 homo sapiens (human). acyl-coa dehydrogenase, very-long-chain specific, mitochondrial precursor (ec 1.3.99.-) (vlcad). 5/2000 [MASS=70390]/Very long chain acyl-coenzyme A dehydrogenase, oxidizes straight chain acyl-CoAs in the initial step of fatty acid beta-oxidation, severe deficiency results in infant cardiomyopathy with high mortality, mild deficiency results in hypoketotic hypoglycemia</p>                                                        |
| <p>SW:FAS_HUMAN P49327 homo sapiens (human). fatty acid synthase (ec 2.3.1.85) [includes: ec 2.3.1.38; ec 2.3.1.39; ec 2.3.1.41; ec 1.1.1.100; ec 4.2.1.61; ec 1.3.1.10; ec 3.1.2.14]. 7/1999 [MASS=273102]/Fatty acid synthase, multifunctional enzyme that synthesizes fatty acids from dietary proteins and carbohydrates; increased expression is associated with tumor growth and development, expression may serve as a prognostic maker for breast cancer</p>                         |
| <p>SW:ERG7_HUMAN P48449 homo sapiens (human). lanosterol synthase (ec 5.4.99.7) (oxidosqualene-lanosterol cyclase) (2,3-epoxysqualene-lanosterol cyclase) (osc). 5/2000 [MASS=83309]/Lanosterol synthase, catalyzes the cyclization of (S)-2,3-oxidosqualene forming lanosterol in sterol biosynthesis</p>                                                                                                                                                                                   |
| <p>SW:COA1_HUMAN Q13085 homo sapiens (human). acetyl-coa carboxylase 1 (ec 6.4.1.2) (acc-alpha) [includes: biotin carboxylase (ec 6.3.4.14)]. 7/1999 [MASS=265040]/Acetyl-Coenzyme A carboxylase alpha, catalyzes the rate-limiting step in long-chain fatty acid biogenesis; deficiency leads to defects in fatty acid synthesis</p>                                                                                                                                                        |
| <p>SW:ACLY_HUMAN P53396 homo sapiens (human). atp-citrate (pro-s-)-lyase (ec 4.1.3.8) (citrate cleavage enzyme). 10/1996 [MASS=121420]/ATP citrate lyase, catalyzes the formation of acetyl-CoA and oxaloacetate from citrate and CoA with the concomitant hydrolysis of ATP to ADP and phosphate, involved in cholesterol and fatty acid synthesis, nutritionally regulated</p>                                                                                                             |
| <p>SW:LDLR_HUMAN P01130 homo sapiens (human). low-density lipoprotein receptor precursor (ldl receptor). 5/2000 [MASS=95376]/Low density lipoprotein receptor, mediates uptake of low density lipoproteins, involved in lipid metabolism; gene variations are associated with familial hypercholesterolemia, hypertension, atherosclerosis, and coronary artery disease</p>                                                                                                                  |
| <p>SW:NSDL_HUMAN Q15738 homo sapiens (human). nad(p)-dependent steroid dehydrogenase-like protein (h105e3 protein). 5/2000 [MASS=41900]/NAD(P)H steroid dehydrogenase-like protein, a 3 beta-hydroxysteroid dehydrogenase that functions in cholesterol biosynthesis; mutations in the corresponding gene cause CHILD syndrome</p>                                                                                                                                                           |
| <p>SW:CP51_HUMAN Q16850 homo sapiens (human). cytochrome p450 51 (ec 1.14.14.1) (cyp1) (p450l1) (sterol 14-alpha demethylase) (lanosterol 14-alpha demethylase) (ldm) (p450-14dm). 5/2000 [MASS=56806]/Lanosterol 14-alpha-demethylase (sterol 14alpha-demethylase); cytochrome P450 enzyme involved in sterol biosynthesis</p>                                                                                                                                                              |
| <p>SW:LCFA_HUMAN P41215 homo sapiens (human). long-chain-fatty-acid--coa ligase 1 (ec 6.2.1.3) (long-chain acyl-coa synthetase 1) (lacs 1) (palmitoyl-coa ligase). 10/1996 [MASS=78348]/Long chain fatty acid-Coenzyme A ligase (palmitoyl-CoA ligase), a member of the long chain acyl-CoA synthetase family required for lipid synthesis and fatty acid degradation</p>                                                                                                                    |
| <p>SW:LCB2_HUMAN O15270 homo sapiens (human). serine palmitoyltransferase 2 (ec 2.3.1.50) (long chain base biosynthesis protein 2) (lcb 2) (serine-palmitoyl-coa transferase 2) (spt 2) (kiaa0526). 5/2000 [MASS=62924]/Serine palmitoyltransferase long chain base subunit 2, member of the aminolevulinatase synthase superfamily, catalyzes the first step in ceramide formation, involved in epidermal cell response to UV exposure and in leukemia cell ectopside-induced apoptosis</p> |
| <p>SW:DRS1_HUMAN O75521 homo sapiens (human). dbi-related protein 1 (drs-1). 5/2000 [MASS=40151]/Peroxisomal D3,D2-enoyl-CoA isomerase, catalyzes the isomerization of 3-cis-octenoyl-CoA to 2-trans-octenoyl-CoA, a step in the beta oxidation of fatty acids in peroxisomes</p>                                                                                                                                                                                                            |
| <p>SWN:P23_HUMAN Q15185 homo sapiens (human). telomerase-binding protein p23 (hsp90 co-chaperone) (progesterone receptor complex p23). 8/2001 [MASS=18697]/Inactive progesterone receptor (23kD), cochaperone with prostaglandin E synthase activity that is a component of the unstimulated progesterone receptor complex and that enhances receptor complex formation through interactions with Hsp90 (HSPCA)</p>                                                                          |

|                                                                                                                                                                                                                                                                                                                                                                                                                                                                           |
|---------------------------------------------------------------------------------------------------------------------------------------------------------------------------------------------------------------------------------------------------------------------------------------------------------------------------------------------------------------------------------------------------------------------------------------------------------------------------|
| SW:KIME_HUMAN Q03426 homo sapiens (human). mevalonate kinase (ec 2.7.1.36) (mk). 7/1999 [MASS=42451]/Mevalonate kinase (mevalonic aciduria), a peroxisomal enzyme involved in isoprenoid and cholesterol biosynthesis; mutations in the corresponding gene cause mevalonic aciduria, hyperimmunoglobulinemia D and periodic fever syndrome                                                                                                                                |
| GP:U66669_1 Homo sapiens 3-hydroxyisobutyryl-coenzyme A hydrolase mRNA, complete cds. [MASS=42908]/Beta-hydroxyisobutyryl-coenzyme A hydrolase, enzyme that hydrolyzes 3-hydroxyisobutyryl CoA, an intermediate of valine catabolism                                                                                                                                                                                                                                      |
| SW:ASAH_HUMAN Q13510 homo sapiens (human). acid ceramidase precursor (ec 3.5.1.23) (acylsphingosine deacylase) (n-acylsphingosine amidohydrolase) (ac) (putative 32 kda heart protein) (php32). 5/2000 [MASS=44650]/N-acylsphingosine amidohydrolase (acid ceramidase), catalyzes hydrolysis of ceramide to sphingosine and free fatty acid, inhibits apoptosis, upregulated in prostate cancer, deficiency is associated with Farber disease                             |
| GP:AF126782_1 Homo sapiens retinal short-chain dehydrogenase/reductase retSDR4 mRNA, complete cds. [MASS=32268]/Short-chain dehydrogenase-reductase 1, catalyzes the NADPH-dependent reduction of all-trans-retinal to retinol, may play a role in visual system phototransduction; the corresponding gene is deleted in many neuroblastoma cell lines with MYCN amplification                                                                                            |
| SW:OXYB_HUMAN P22059 homo sapiens (human). oxysterol-binding protein. 11/1995 [MASS=89421]/Oxysterol binding protein, member of a family of intracellular lipid receptors, contains a pleckstrin domain and an oxysterol binding domain, binds oxysterols, may play a role in the regulation of cholesterol metabolism and oxysterol-induced cell death                                                                                                                   |
| SW:CPT2_HUMAN P23786 homo sapiens (human). carnitine o-palmitoyltransferase ii, mitochondrial precursor (ec 2.3.1.21) (cpt ii). 5/2000 [MASS=73777]/Carnitine palmitoyltransferase II, a mitochondrial long-chain fatty acid oxidation enzyme; mutations are associated with a lipid metabolism disorder that includes recurrent myopathy with progressive rhabdomyolysis, muscle weakness and myoglobinuria                                                              |
| SW:FAAH_HUMAN O00519 homo sapiens (human). fatty-acid amide hydrolase (ec 3.1.-.-) (oleamide hydrolase). 5/2000 [MASS=63038]/Fatty acid amide hydrolase, degrades neuromodulatory fatty acid amides, including anandamide, predicted to have a role in a wide variety of physiologic effects such as voluntary movement, pain, sleep, and fertility, may have a role in Parkinson disease                                                                                 |
| SW:HBP_HUMAN Q00341 homo sapiens (human). high density lipoprotein binding protein (hdl-binding protein). 12/1998 [MASS=141440]/High density lipoprotein binding protein, binds and inhibits cleavage of the 3' UTR of vitellogenin mRNA, binds and promotes nuclear export of tRNA, binds high density lipoproteins and may have roles in cholesterol metabolism and atherogenesis                                                                                       |
| SW:NPC1_HUMAN O15118 homo sapiens (human). niemann-pick c1 protein precursor. 5/2000 [MASS=142149]/Niemann-Pick disease type C1, a lysosomal sterol transporter involved in cholesterol metabolism; mutation of the corresponding gene causes Niemann-Pick type C1 disease and mutation of mouse Npc1 causes a disease like Niemann-Pick type C1 disease                                                                                                                  |
| SW:PEBP_HUMAN P30086 homo sapiens (human). phosphatidylethanolamine-binding protein (pebp) (neuropolypeptide h3). 7/1999 [MASS=20926]/Phosphatidylethanolamine-binding protein, binds GTP, may regulate cAMP accumulation, enhance acetylcholine synthesis, and play a role in organizing phospholipids in the myelin sheath                                                                                                                                              |
| SW:GLCM_HUMAN P04062 homo sapiens (human). glucosylceramidase precursor (ec 3.2.1.45) (beta-glucocerebrosidase) (acid beta-glucosidase) (d-glucosyl-n-acylsphingosine glucohydrolase) (alglucerase) (imigl [MASS=59697]/Acid beta glucosidase (beta-glucocerebrosidase), a lysosomal membrane protein that hydrolyzes glucosylceramide and glucosylsphingosine, may play a role in epidermal differentiation; mutations in the corresponding gene cause Gaucher's disease |
| SW:PI52_HUMAN P48426 homo sapiens (human). phosphatidylinositol-4-phosphate 5-kinase type ii alpha (ec 2.7.1.68) (pip5kii-alpha) (1-phosphatidylinositol-4-phosphate kinase) (ptdins(4)p-5-kinase b isoform [MASS=46193]/Phosphatidylinositol-4-phosphate 5-kinase type II, alpha, a member of a family of kinases responsible for the synthesis of PtdIns(4,5)P2                                                                                                         |
| GP:AF034544_1 Homo sapiens delta7-sterol reductase mRNA, complete cds; D7SR. [MASS=54516]/7-dehydrocholesterol reductase, catalyzes the reduction of the C7-C8 (delta 7) double bond of 7-dehydrocholesterol in the last step of cholesterol biosynthesis; mutations in the corresponding gene are associated with Smith-Lemli-Opitz                                                                                                                                      |
| SW:THIK_HUMAN P09110 homo sapiens (human). 3-ketoacyl-coa thiolase, peroxisomal precursor (ec 2.3.1.16) (beta-ketothiolase) (acetyl-coa acyltransferase) (peroxisomal 3-oxoacyl-coa thiolase). 7/1999 [MASS=44292]/Peroxisomal 3-oxoacyl-coenzyme A thiolase (peroxisomal 3-ketoacyl-Coenzyme A thiolase), functions in peroxisomal beta-oxidation of fatty acids, deficiency is associated with rhizomelic chondrodysplasia punctata (RCDP)                              |
| SW:CPT1_HUMAN P50416 homo sapiens (human). carnitine o-palmitoyltransferase i, mitochondrial liver isoform (ec 2.3.1.21) (cpt i) (cpti-l). 7/1999 [MASS=88429]/Liver carnitine palmitoyltransferase I, enzyme of long-chain fatty acid beta-oxidation pathway; mutations in the corresponding gene are associated with carnitine palmitoyltransferase I deficiency                                                                                                        |
| SW:D3D2_HUMAN P42126 homo sapiens (human). 3,2-trans-enoyl-coa isomerase, mitochondrial precursor (ec 5.3.3.8) (dodecenoyl-coa delta-isomerase). 7/1999 [MASS=32816]/Dodecenoyl-Coenzyme A delta isomerase (3,2 trans-enoyl-Coenzyme A isomerase), catalyzes the isomerization of 3-cis and 3-trans enoyl CoA esters to 2-trans enoyl CoA esters, functions in mitochondrial beta-oxidation of unsaturated fatty acids                                                    |



|                                                                                                                                                                                                                                                                                                                                                                                                                                                                                        |
|----------------------------------------------------------------------------------------------------------------------------------------------------------------------------------------------------------------------------------------------------------------------------------------------------------------------------------------------------------------------------------------------------------------------------------------------------------------------------------------|
| <p>SW:SAP_HUMAN P07602 h proactivator polypeptide precursor [contains: saposin a (protein a); saposin b (sphingolipid activator protein 1) (sap-1) (dispersin) (sulfatide/gm1 activator); saposin c (co-beta- [MASS=58113]/Prosaposin, precursor of saposins A, B, C, and D which transport gangliosides and activate sphingolipid hydrolysis, stimulates neurite growth and inhibits apoptosis; variants are associated with metachromatic leukodystrophy and Gaucher disease</p>     |
| <p>GP:AB037108_1 Homo sapiens mRNA for seven transmembrane domain orphan receptor, complete cds; seven transmembrane domain containing protein. [MASS=41090]/Protein with strong similarity to murine Tpra40, which is a seven transmembrane domain protein expressed in 3T3 adipocytes, and that has elevated expression in epididymal fat of genetically diabetic and obese mice</p>                                                                                                 |
| <p>SW:ECH1_HUMAN Q13011 homo sapiens (human). delta3,5-delta2,4-dienoyl-coa isomerase precursor (ec 5.3.3.-). 7/1999 [MASS=35994]/Enoyl Coenzyme A hydratase 1 (peroxisomal), putative enzyme that may play a role in peroxisomal beta-oxidation</p>                                                                                                                                                                                                                                   |
| <p>SW:SAP3_HUMAN P17900 homo sapiens (human). ganglioside gm2 activator precursor (cerebroside sulfate activator protein) (shingolipid activator protein 3) (sap-3). 7/1999 [MASS=20822]/GM2 ganglioside activator protein, binds glycolipids and is a cofactor for GM2 ganglioside hydrolysis by beta hexosaminidase A, activates phospholipase D, and inhibits platelet activating factor; mutation of the gene causes GM2-gangliosidosis variant AB</p>                             |
| <p>GP:AF035959_1 Homo sapiens type-2 phosphatidic acid phosphatase-gamma (PAP2-g) mRNA, complete cds; phosphatidate phosphohydrolase; phospholipid phosphatase. [MASS=32574]/Phosphatidic acid phosphatase 2c, hydrolyzes phospholipids, may play a role in signal transduction</p>                                                                                                                                                                                                    |
| <p>SW:OCRL_HUMAN Q01968 homo sapiens (human). lowe's oculocerebrorenal syndrome protein. 7/1998 [MASS=111485]/Oculocerebrorenal syndrome of Lowe, phosphatidylinositol-4,5-bisphosphate 5-phosphatase, may play a role in intracellular protein trafficking; mutation of the corresponding gene causes Lowe oculocerebrorenal syndrome</p>                                                                                                                                             |
| <p>GP:AB033078_1 Homo sapiens mRNA for KIAA1252 protein, partial cds; Start codon is not identified.. [MASS=64962]/Protein with strong similarity to sphingosine phosphate lyase 1 (mouse Sgpl1), which is a member of the carbon-carbon lyase subclass of aldehyde-lyases that catalyzes cleavage of sphingosine phosphate and is involved in proliferative signal transduction</p>                                                                                                   |
| <p>SWN:CNE3_HUMAN O75131 homo sapiens (human). copine iii. 8/2001 [MASS=60131]/Copine III, a member of the copine family of phospholipid binding proteins, contains C2 and integrin A domains, may play a role in membrane trafficking, displays protein kinase activity, however, it does not contain a traditional kinase catalytic domain</p>                                                                                                                                       |
| <p>SW:NLTP_HUMAN P22307 homo sapiens (human). nonspecific lipid-transfer protein precursor (nsl-tp) (sterol carrier protein 2) (scp-2) (sterol carrier protein x) (scp-x) (scpx). 5/2000 [MASS=58994]/Sterol carrier protein 2, catalyzes the exchange of phospholipids between membranes, stimulates cholesterol metabolism and may regulate steroidogenesis; alternative form, SCPX, is a 3 oxoacyl CoA thiolase</p>                                                                 |
| <p>SW:CAOP_HUMAN Q15067 homo sapiens (human). acyl-coenzyme A oxidase, peroxisomal (ec 1.3.3.6) (palmitoyl-coa oxidase) (aox). 11/1997 [MASS=74502]/Peroxisomal acyl-coenzyme A oxidase, catalyzes the first step in very long chain fatty acid beta-oxidation, desaturates acyl-CoA to 2-trans-enoyl-CoA and produces hydrogen peroxide</p>                                                                                                                                           |
| <p>SW:PKBS_HUMAN P30536 homo sapiens (human). peripheral-type benzodiazepine receptor (pbr) (pkbs) (mitochondrial benzodiazepine receptor). 6/1994 [MASS=18779]/Benzodiazepine receptor (peripheral), involved in steroid biosynthesis, cell proliferation, and may contribute to mitochondrial biogenesis and inhibit oxygen radical induced apoptosis; expression, nuclear location may correlate to breast tumor progression</p>                                                    |
| <p>SW:PXF_HUMAN P40855 homo sapiens (human). peroxisomal farnesylated protein (33 kda housekeeping protein). 12/1998 [MASS=32807]/Peroxisomal farnesylated protein, peroxisomal protein that binds several peroxisomal membrane proteins (PMP), involved in early stages of PMP import and peroxisomal biogenesis; deficiency is associated with Zellweger syndrome complementation group J</p>                                                                                        |
| <p>SW:DHA4_HUMAN P51648 homo sapiens (human). fatty aldehyde dehydrogenase (ec 1.2.1.3) (aldehyde dehydrogenase, microsomal) (aldh class 3). 7/1999 [MASS=54848]/Aldehyde dehydrogenase 3 family member A2, catalyzes the oxidation of long chain fatty aldehydes and leukotrienes; mutation of the corresponding gene causes Sjogren Larsson syndrome, a disorder marked by mental retardation, spasticity, and ichthyosis</p>                                                        |
| <p>SW:HCD2_HUMAN Q99714 homo sapiens (human). 3-hydroxyacyl-coa dehydrogenase type ii (ec 1.1.1.35) (endoplasmic reticulum-associated amyloid beta-peptide binding protein) (short-chain type dehydrogenase/ [MASS=26923]/Hydroxyacyl-Coenzyme A dehydrogenase (type II), catalyzes the oxidation of steroids and alcohols, binds amyloid-beta protein; overexpressed and mediates neurotoxicity of Alzheimer's disease, mutation in the corresponding gene causes hyperinsulinism</p> |
| <p>SW:DHB4_HUMAN P51659 homo sapiens (human). estradiol 17 beta-dehydrogenase 4 (ec 1.1.1.62) (17-beta-hsd 4) (17-beta-hydroxysteroid dehydrogenase 4). 11/1997 [MASS=79686]/Type IV 17 beta-hydroxysteroid dehydrogenase, a peroxisomal multifunctional enzyme with estradiol 17 beta-dehydrogenase and D-3 hydroxyacyl CoA dehydratase activities, involved in steroid and bile acid metabolism</p>                                                                                  |
| <p>SW:BDH_HUMAN P06280 homo sapiens (human). alpha-galactosidase a precursor (ec 3.2.1.22) (melibiase) (alpha-d-galactoside galactohydrolase) (alpha-d-galactosidase a). 7/1998 [MASS=48767]/Alpha-galactosidase A (alpha-D-galactoside galactohydrolase), hydrolyzes glycosphingolipids to release alpha-D-galactosyl residues; mutation of the corresponding gene causes Fabry disease</p>                                                                                           |
| <p>SW:ADRO_HUMAN P22570 homo sapiens (human). nadph:adrenodoxin oxidoreductase precursor (ec 1.18.1.2) (adrenodoxin reductase) (ferredoxin-nadp(+)) reductase). 7/1999 [MASS=53809]/Ferredoxin reductase, mitochondrial flavoprotein that mediates electron transport from NADPH to cytochrome P450scc</p>                                                                                                                                                                             |

|                                                                                                                                                                                                                                                                                                                                                                                                                                                                                                                                                                              |
|------------------------------------------------------------------------------------------------------------------------------------------------------------------------------------------------------------------------------------------------------------------------------------------------------------------------------------------------------------------------------------------------------------------------------------------------------------------------------------------------------------------------------------------------------------------------------|
| <p>SW:ECHB_HUMAN P55084 homo sapiens (human). trifunctional enzyme beta subunit, mitochondrial precursor (tp-beta) [includes: 3-ketoacyl-coa thiolase (ec 2.3.1.16) (acetyl-coa acyltransferase) (beta-ketothi [MASS=51294]/3-hydroxyacyl-CoA dehydrogenase, 3-ketoacyl-CoA thiolase trifunctional protein beta subunit, involved in fatty acid beta-oxidation; variants are associated with trifunctional protein deficiency, sudden infant death syndrome and liver failure</p>                                                                                            |
| <p>SW:CNBP_HUMAN P20694 homo sapiens (human), and rattus norvegicus (rat). cellular nucleic acid binding protein (cnbp). 11/1997 [MASS=19463]/Zinc-finger protein that binds to sterol regulatory element (SRE) and may function in sterol-mediated repression of genes encoding the low density lipoprotein receptor and enzymes of the cholesterol biosynthetic pathway</p>                                                                                                                                                                                                |
| <p>SW:MAOM_HUMAN P23368 homo sapiens (human). nad-dependent malic enzyme, mitochondrial precursor (ec 1.1.1.38) (nad-me). 5/2000 [MASS=65444]/Malic enzyme 2, a NAD(+)-dependent mitochondrial form of malic enzyme, catalyzes the oxidative decarboxylation of malate to form pyruvate</p>                                                                                                                                                                                                                                                                                  |
| <p>SW:ECHA_HUMAN P40939 homo sapiens (human). mitochondrial trifunctional enzyme alpha subunit precursor (tp-alpha) [includes: long-chain enoyl-coa hydratase (ec 4.2.1.17); long chain 3-hydroxyacyl-coa deh [MASS=82960]/Mitochondrial long-chain enoyl-CoA hydratase/3-hydroxyacyl-CoA dehydrogenase/3-ketoacyl-CoA thiolase alpha subunit, involved in fatty acid beta-oxidation, mutations are associated with trifunctional protein deficiency and Reye-like syndrome</p>                                                                                              |
| <p>SW:ETFB_HUMAN P38117 homo sapiens (human). electron transfer flavoprotein beta-subunit (beta-efb). 5/2000 [MASS=27844]/Electron transfer flavoprotein beta subunit, shuttles electrons between primary flavoprotein dehydrogenases involved in mitochondrial fatty acid metabolism and ubiquinone oxidoreductase; genetic variants are associated with type II glutaric acidemia</p>                                                                                                                                                                                      |
| <p>GP:AL023805_1 Human DNA sequence from clone RP4-811H13 on chromosome 20p12. Contains part of the PLCB4 gene for Phospholipase C beta 4, STSs, GSSs and a CpG island, complete sequence; combines with dJ1119D9.2.1 and .2 in Em:AL031652 to form isoforms 5 and 6; may a [MASS=61433]/1-phosphatidylinositol-4,5-bisphosphate phosphodiesterase beta 4/Phospholipase C beta 4, member of a G protein-regulated family of phospholipases that hydrolyze phosphatidylinositol 4,5-bisphosphate to the second messengers inositol 1,4,5-trisphosphate and diacylglycerol</p> |
| <p>SW:GST3_HUMAN O14880 homo sapiens (human). microsomal glutathione s-transferase 3 (ec 2.5.1.18) (microsomal gst- 3) (microsomal gst-iii). 5/2000 [MASS=16516]/Microsomal glutathione S-transferase 3, a microsomal membrane protein that has glutathione-dependent transferase and peroxidase activities, member of a family that includes 5-lipoxygenase activating protein (ALOX5AP) and leukotriene-C4 synthase (LTC4S)</p>                                                                                                                                            |
| <p>SW:ETFA_HUMAN P13804 homo sapiens (human). electron transfer flavoprotein alpha-subunit precursor (alpha-efb). 5/2000 [MASS=35080]/Electron transfer flavoprotein alpha subunit, shuttles electrons between flavoprotein dehydrogenases of mitochondrial fatty acid metabolism and ubiquinone oxidoreductase, deficiency associated with Type II glutaric aciduria</p>                                                                                                                                                                                                    |
| <p>SW:MAZ_HUMAN P56270 homo sapiens (human). myc-associated zinc finger protein (mazi) (purine-binding transcription factor) (pur-1) (zf87) (zif87). 7/1999 [MASS=48608]/MYC-associated zinc finger protein (purine-binding transcription factor), functions both as a positive and a negative regulator of gene expression and may also have roles in initiating and terminating transcription</p>                                                                                                                                                                          |
| <p>SW:THIL_HUMAN P24752 homo sapiens (human). acetyl-coa acetyltransferase, mitochondrial precursor (ec 2.3.1.9) (acetoacetyl-coa thiolase) (t2). 7/1999 [MASS=45200]/Acetyl-Coenzyme A acetyltransferase 1 (mitochondrial acetoacetyl-coenzyme A thiolase); mutations in the corresponding gene are associated with 3-ketothiolase deficiency</p>                                                                                                                                                                                                                           |
| <p>GP:AF161397_1 Homo sapiens HSPC279 mRNA, partial cds. [MASS=64199]/Homo sapiens mRNA for 2-hydroxyphytanoyl-CoA lyase; thiamine pyrophosphate dependent enzyme/2-Hydroxyphytanoyl-CoA lyase (peroxisomal 2-hydroxyphytanoyl-CoA lyase), catalyzes the thiamine pyrophosphate-dependent cleavage of C-C bonds during alpha-oxidation of 3-methyl-branched fatty acids to form formyl-CoA and 2-methyl-branched fatty aldehyde</p>                                                                                                                                          |
| <p>SW:TPP1_HUMAN O14773 homo sapiens (human). tripeptidyl-peptidase i precursor (ec 3.4.14.9) (tpp-i) (tripeptidyl aminopeptidase) (lysosomal pepstatin insensitive protease) (lpic). 5/2000 [MASS=61229]/Tripeptidyl peptidase I (ceroid-lipofuscinosis neuronal 2), a lysosomal serine-type peptidase required for degradation of ATP synthase subunit c (ATP5G1 and ATP5G2); mutations in the corresponding gene cause late infantile neuronal ceroid lipofuscinosis</p>                                                                                                  |
| <p>GP:AF002668_1 Homo sapiens putative fatty acid desaturase MLD mRNA, complete cds; putative fatty acid desaturase. [MASS=37866]/Degenerative spermatocyte homolog (Drosophila), member of the membrane fatty acid desaturase family, regulates the biosynthesis of the epidermal growth factor receptor (EGFR)</p>                                                                                                                                                                                                                                                         |
| <p>SW:PA2M_HUMAN P14555 homo sapiens (human). phospholipase a2, membrane associated precursor (ec 3.1.1.4) (phosphatidylcholine 2-acylhydrolase) (group ii phospholipase a2) (non-pancreatic secretory phosph [MASS=16083]/Group IIA phospholipase A2, a secreted member of the phospholipase A2 family that hydrolyzes the phospholipid sn-2 ester bond, plays roles in phospholipid metabolism, host defense, and inflammation; gene loss reported in a sporadic colorectal tumor</p>                                                                                      |
| <p>GP:AJ002744_1 Homo sapiens mRNA for UDP-GalNAc:polypeptide N-acetylgalactosaminyltransferase 7. [MASS=75402]/UDP-N-acetyl-alpha-D-galactosamine:polypeptide N-acetylgalactosaminyltransferase 7, enzyme that functions in O-glycosylation and is specific for partially glycosylated substrates</p>                                                                                                                                                                                                                                                                       |
|                                                                                                                                                                                                                                                                                                                                                                                                                                                                                                                                                                              |

|                                                                                                                                                                                                                                                                                                                                                                                                      |
|------------------------------------------------------------------------------------------------------------------------------------------------------------------------------------------------------------------------------------------------------------------------------------------------------------------------------------------------------------------------------------------------------|
| PIR2:JE0334 nuclear matrix protein NMP 238 - human [MASS=50228]/RuvB like 1, a member of the TIP49 family of proteins, a nuclear protein which contains ATPase-helicase motifs, may interact with the transactivation domain of c-myc (MYC)                                                                                                                                                          |
| SW:CTOG_HUMAN Q14008 homo sapiens (human). ch-tog protein (colonic and hepatic tumor over-expressed protein) (kiaa0097). 5/2000 [MASS=225509]/Microtubule-associated protein that promotes rapid plus end microtubule assembly necessary for mitotic spindle assembly                                                                                                                                |
| SW:SNAG_HUMAN Q99747 homo sapiens (human). gamma-soluble nsf attachment protein (snap-gamma). 7/1999 [MASS=34746]/N-ethylmaleimide-sensitive factor (NSF) attachment protein gamma, member of a family of proteins involved in membrane fusion during exocytosis, may have roles in platelet exocytosis and in the attachment of mitochondria to the cytoskeleton                                    |
| SW:RB3B_HUMAN P20337 homo sapiens (human). ras-related protein rab-3b. 10/1994 [MASS=24760]/Ras-related GTP-binding protein 3b, a GTP-binding protein and GTPase that is involved in exocytosis                                                                                                                                                                                                      |
| SW:RB4A_HUMAN P20338 homo sapiens (human). ras-related protein rab-4a. 10/1996 [MASS=23902]/GTP-binding protein, a member of the rab family of proteins, involved in early endosome trafficking and receptor recycling                                                                                                                                                                               |
| SW:STB3_HUMAN O00186 homo sapiens (human). syntaxin binding protein 3 (unc-18 homolog 3) (unc-18c) (unc-18-3). 5/2000 [MASS=67574]/Syntaxin binding protein 3, binds syntaxin 4 (STX4), predicted to be involved in vesicle transport and docking and in neurotransmitter release                                                                                                                    |
| SW:RB35_HUMAN Q15286 homo sapiens (human). ras-related protein rab-35 (rab-1c) (gtp-binding protein ray). 5/2000 [MASS=23025]/Ras-related GTP-binding protein 35, member of the Rab family of GTP-binding proteins, may function in vesicular transport                                                                                                                                              |
| SW:SN23_HUMAN O00161 homo sapiens (human). synaptosomal associated protein 23 (snap-23) (vesicle-membrane fusion protein snap-23). 5/2000 [MASS=23354]/Synaptosomal-associated protein 23, a member of the SNARE family of proteins that regulate membrane fusion during exocytosis, a t-SNARE that binds to syntaxins and is involved in docking and fusion of transport vesicles during exocytosis |
| SW:RB3D_HUMAN O95716 homo sapiens (human). ras-related protein rab-3d. 5/2000 [MASS=24267]/Ras-related GTP-binding protein 3d, putative small monomeric GTP-binding protein and GTPase that plays a role in regulated secretion                                                                                                                                                                      |
| SW:RAB2_HUMAN P08886 homo sapiens (human), and canis familiaris (dog). ras-related protein rab-2. 10/1994 [MASS=23546]/Ras-related GTP-binding protein 2, a GTPase which plays a role in vesicle transport from the ER to the Golgi complex; overexpression in nonmalignant peripheral blood lymphocytes is associated with Searzy syndrome                                                          |
| SW:ANX7_HUMAN P20073 homo sapiens (human). annexin vii (synexin). 5/2000 [MASS=50316]/Annexin A7 (synexin), a calcium-dependent GTPase that acts as a voltage-dependent calcium channel, interaction with galectin 3 (LGALS3) suggests roles in apoptosis and exocytosis, may function as a tumor suppressor                                                                                         |
| GP:AF044670_1 Homo sapiens 33 kDa Vamp-associated protein (VAP33) mRNA, complete cds; VAP-33. [MASS=27318]/Vesicle-associated membrane protein (VAMP)-associated protein A, binds v-SNAREs, t-SNAREs, VAPB, and VAMP, predicted to be involved in vesicle transport and fusion                                                                                                                       |
| GP:AF004563_1 Homo sapiens hUNC18b alternatively-spliced mRNA, complete cds; alternatively-spliced; similar to rat n-Sec1. [MASS=68736]/Syntaxin-binding protein 1, binds syntaxins, may be involved in synaptic vesicle exocytosis                                                                                                                                                                  |
| SWN:STX8_HUMAN Q9unk0 homo sapiens (human). syntaxin 8. 8/2001 [MASS=26907]/Syntaxin 8, member of the soluble NSF attachment protein receptor (SNARE) family, plays a role in endosome trafficking, may mediate vesicle docking and fusion, may regulate CFTR-mediated chloride currents                                                                                                             |
| GP:AF032922_1 Homo sapiens syntaxin 4 binding protein UNC-18c (UNC-18c) mRNA, complete cds. [MASS=67764]/Syntaxin binding protein 3, binds syntaxin 4 (STX4), predicted to be involved in vesicle transport and docking and in neurotransmitter release                                                                                                                                              |
| SW:STB2_HUMAN Q15833 homo sapiens (human). syntaxin binding protein 2 (unc-18 homolog 2) (unc-18b). 5/2000 [MASS=66439]/Syntaxin-binding protein 2, a member of the Sec1 family of proteins involved in synaptic transmission and secretion, may be involved in intracellular vesicular transport                                                                                                    |
| SW:NSF_HUMAN P46459 homo sapiens (human). vesicular-fusion protein nsf (n-ethylmaleimide-sensitive fusion protein) (nem-sensitive fusion protein). 12/1998 [MASS=82654]/N-ethylmaleimide-sensitive factor, an ATPase involved in membrane fusion during exocytosis                                                                                                                                   |
| SW:RAB7_HUMAN P51149 homo sapiens (human). ras-related protein rab-7. 7/1998 [MASS=23490]/Ras-related GTP-binding protein 7, a member of the rab family of proteins that is involved in vesicle transport, membrane fusion, and vacuole formation; implicated in Chediak Higashi Syndrome                                                                                                            |
| SW:RB13_HUMAN P51153 homo sapiens (human). ras-related protein rab-13. 12/1998 [MASS=22774]/Ras-related GTP-binding protein 13, a putative RAB small monomeric GTPase that is likely to play a role in intracellular protein trafficking and cell adhesion                                                                                                                                           |
| SW:DYN2_HUMAN P50570 homo sapiens (human). dynamin 2. 10/1996 [MASS=98018]/Dynamin II, member of a family of 100-kD guanosine triphosphatases, regulates budding of endocytic vesicles at the plasma membrane and may function in the formation of transport vesicles at the trans-Golgi                                                                                                             |
| GP:AB002323_1 Human mRNA for KIAA0325 gene, partial cds. [MASS=238445]/Dynein cytoplasmic heavy chain 1, a member of a family of dynein ATPases that function as motor proteins, plays a role in mitotic spindle formation                                                                                                                                                                           |

|                                                                                                                                                                                                                                                                                                                                                                                                                                                                  |
|------------------------------------------------------------------------------------------------------------------------------------------------------------------------------------------------------------------------------------------------------------------------------------------------------------------------------------------------------------------------------------------------------------------------------------------------------------------|
| <p>PIR2:T03842 fission yeast Skb1 protein homolog - human [MASS=72786]/Protein arginine methyltransferase 5, methylates target proteins on arginine residues, may inhibit mitosis</p>                                                                                                                                                                                                                                                                            |
| <p>SW:G25B_HUMAN P21181 homo sapiens (human), mus musculus (mouse), and bos taurus (bovine). g25k gtp-binding protein, brain isoform (gp) (cdc42 homolog). 12/1998 [MASS=21311]/Cell division cycle 42 (GTP binding protein 25kD), Rho GTPase involved in actin cytoskeleton organization, cell migration, cell cycle progression and apoptosis, downregulated in fibroblasts and macrophages from patients with Tangiers disease</p>                            |
| <p>SWN:STX8_HUMAN Q9unk0 homo sapiens (human). syntaxin 8. 8/2001 [MASS=26907]/Syntaxin 8, member of the soluble NSF attachment protein receptor (SNARE) family, plays a role in endosome trafficking, may mediate vesicle docking and fusion, may regulate CFTR -mediated chloride currents</p>                                                                                                                                                                 |
| <p>SW:DYNA_HUMAN Q14203 homo sapiens (human). dynactin, 150 kda isoform (150 kda dynein-associated polypeptide) (dp-150) (dap-150) (p150-glued) (p135) (fragment). 5/2000 [MASS=140784]/Dynactin 1 ((p150, Glued (Drosophila) homolog), microtubule associated protein, interacts with HsEg5 (KNSL1), may play a role in cell division, level is reduced in apoptotic cells</p>                                                                                  |
| <p>SW:RAN_HUMAN P17080 homo sapiens (human). gtp-binding nuclear protein ran (tc4). 12/1998 [MASS=24354]/RAN, member of the ras family of GTP binding proteins, couples completion of DNA synthesis to mitosis and induces mitotic spindle formation, involved in nuclear transport of RNA and proteins, interacts with polyglutamate repeats of the androgen receptor</p>                                                                                       |
| <p>PIR2:T47172 hypothetical protein DKFZp762H186.1 - human (fragment) [MASS=55769]/Coronin actin-binding protein 1C, a member of the coronin-like protein family, has five WD repeats and a coiled-coil motif, a putative actin binding protein that may play a role in mitosis, cytokinesis, cell motility, signal transduction, and phagocytosis</p>                                                                                                           |
| <p>SW:PP1A_HUMAN P08129 homo sapiens (human), mus musculus (mouse), rattus norvegicus (rat), and oryctolagus cuniculus (rabbit). serine/threonine protein phosphatase pp1-alpha 1 catalytic subunit (ec 3.1.3 [MASS=37512]/Protein phosphatase 1 catalytic subunit alpha isoform, plays roles in diverse cellular signal transduction processes that involve protein dephosphorylation, regulates of cell growth and apoptosis and may be a tumor suppressor</p> |
| <p>PIR2:T00387 KIAA0622 protein - human (fragment) [MASS=141604]/CLIP-associating protein 1 (Mast), a microtubule-associated protein with a putative role in centrosome separation and organization of the bipolar mitotic spindle</p>                                                                                                                                                                                                                           |
| <p>SW:CTOG_HUMAN Q14008 homo sapiens (human). ch-tog protein (colonic and hepatic tumor over-expressed protein) (kiaa0097). 5/2000 [MASS=225509]/Microtubule-associated protein that promotes rapid plus end microtubule assembly necessary for mitotic spindle assembly</p>                                                                                                                                                                                     |
| <p>SW:CUL2_HUMAN Q13617 homo sapiens (human). cullin homolog 2 (cul-2). 12/1998 [MASS=86956]/Cullin 2, has E3 ubiquitin ligase activity when present in a complex containing von Hippel Lindau tumor suppressor (VHL)- elogin B (TCEB2)- elogin C (TCEB1); modification by ubiquitin-like protein NEDD8 may be important for VHL tumor suppressor function</p>                                                                                                   |
| <p>SW:BUB3_HUMAN O43684 homo sapiens (human). mitotic checkpoint protein bub3. 5/2000 [MASS=37155]/Budding uninhibited by benzimidazoles 3 homolog, involved in the mitotic spindle checkpoint, localization to unattached kinetochores suggests a role in detecting microtubule attachment, required for the localization of BUB1 and BUB1B to kinetochores</p>                                                                                                 |
|                                                                                                                                                                                                                                                                                                                                                                                                                                                                  |
| <p>SW:IMB3_HUMAN O00410 homo sapiens (human). importin beta-3 subunit (karyopherin beta-3 subunit) (ran-binding protein 5). 12/1998 [MASS=123630]/Karyopherin beta 3, a subunit of the nuclear localization signal receptor complex and plays a role in nuclear import of ribosomal proteins; inhibited by interaction with hepatitis C virus nonstructural protein 5A</p>                                                                                       |
| <p>SW:IMA1_HUMAN P52294 homo sapiens (human). importin alpha-1 subunit (karyopherin alpha-1 subunit) (srp1-beta) (rag cohort protein 2) (nucleoprotein interactor 1) (npi-1). 12/1998 [MASS=60307]/Karyopherin alpha (importin alpha), a subunit of the nuclear localization sequence (NLS) receptor complex that binds to and mediates the nuclear import of RAG1 and STAT1</p>                                                                                 |
| <p>SW:COF1_HUMAN P23528 homo sapiens (human). cofilin, non-muscle isoform. 11/1997 [MASS=18502]/Non-muscle cofilin, an actin-binding protein that assists translocation of actin from the cytoplasm to the nucleus; inactivation through phosphorylation by LIM-kinase leads to actin depolymerization</p>                                                                                                                                                       |
| <p>SW:IMB1_HUMAN Q14974 homo sapiens (human). importin beta-1 subunit (karyopherin beta-1 subunit) (nuclear factor p97) (importin 90). 12/1998 [MASS=97234]/Importin beta (karyopherin beta 1), a subunit of the NLS (nuclear localization signal) receptor complex, binds to the nuclear pore complex and mediates translocation of the importin alpha-NLS complex into the nucleus</p>                                                                         |
| <p>SW:ARS1_HUMAN O43681 homo sapiens (human). arsenical pump-driving atpase (ec 3.6.1.-) (arsenite-translocating atpase) (arsenical resistance atpase) (arsa) (asna-i). 5/2000 [MASS=38793]/Arsenite transporter ATP-binding homolog 1, a soluble putative arsenite transporter with similarity to bacterial arsA that has ATPase activity, may function in nucleocytoplasmic transport of a nucleolar component, and is stimulated by arsenite</p>              |
| <p>SW:C211_HUMAN P53801 homo sapiens (human). putative surface glycoprotein c21orf1 precursor (c21orf3). 7/1999 [MASS=20324]/Pituitary tumor-transforming gene 1 interacting protein, binds to pituitary tumor-transforming gene (PTTG1) and may promote nuclear translocation of PPTG1 to the nucleus</p>                                                                                                                                                       |

|                                                                                                                                                                                                                                                                                                                                                                                                                                                            |
|------------------------------------------------------------------------------------------------------------------------------------------------------------------------------------------------------------------------------------------------------------------------------------------------------------------------------------------------------------------------------------------------------------------------------------------------------------|
| SW:RAN_HUMAN P17080 homo sapiens (human). gtp-binding nuclear protein ran (tc4). 12/1998 [MASS=24354]/RAN, member of the ras family of GTP binding proteins, couples completion of DNA synthesis to mitosis and induces mitotic spindle formation, involved in nuclear transport of RNA and proteins, interacts with polyglutamate repeats of the androgen receptor                                                                                        |
| SW:IMB2_HUMAN Q92973 homo sapiens (human). importin beta-2 subunit (karyopherin beta-2 subunit) (transportin) (m9 region interaction protein) (mip). 5/2000 [MASS=101310]/Transportin (karyopherin beta 2), a component of the nuclear pore complex, mediates the import of HNRPA1 by binding the M9 nuclear localization sequence, also binds nuclear Ran GTP and nucleoporin Nup153; may mediate mRNA transport                                          |
| SW:CRTC_HUMAN P27797 homo sapiens (human). calreticulin precursor (crp55) (calregulin) (hacbp) (erp60) (52 kda ribonucleoprotein autoantigen ro/ss-a). 7/1998 [MASS=48142]/Calreticulin, an ER-resident Ca2+-binding protein and lectin-binding chaperone involved in protein folding, Ca2+ homeostasis, cell adhesion, and integrin signaling; anti-angiogenic fragment, vasostatin, is a potential anti-cancer agent                                     |
| SW:ER60_HUMAN P30101 homo sapiens (human). probable protein disulfide isomerase er-60 precursor (ec 5.3.4.1) (erp60) (58 kda microsomal protein) (p58) (grp58) (erp57). 7/1998 [MASS=56782]/Glucose regulated 58kDa protein, acts as a protein disulfide isomerase and possibly a protease, involved in folding and maturation of N-linked glycoproteins and MHC class I antigen processing; identified as a sperm antigen in immunological infertility    |
| SW:PAB1_HUMAN P11940 homo sapiens (human). polyadenylate-binding protein 1 (poly(a) binding protein 1) (pabp 1). 7/1998 [MASS=70671]/Poly(A)-binding protein cytoplasmic 1, binds to poly(A) tails of mRNA and plays roles in regulating mRNA stability and translation, also implicated in mRNA transport from the nucleus to the cytoplasm                                                                                                               |
| SW:RCC_HUMAN P18754 homo sapiens (human). regulator of chromosome condensation (cell cycle regulatory protein). 7/1999 [MASS=44969]/Regulator of chromosome condensation 1, a chromatin-binding protein that functions as a guanine nucleotide exchange factor for RAN, plays roles in nucleocytoplasmic transport, mitotic spindle formation, and nuclear envelope assembly                                                                               |
| PIR:T13159 E1B-55kDa-associated protein - human [MASS=95810]/E1B-55kDa-associated protein 5, a heterogeneous nuclear ribonucleoprotein involved in nucleocytoplasmic transport of adenovirus and cellular mRNAs, binds adenovirus early 1B (E1B-55 kD) protein and may regulate viral oncogenic transformation                                                                                                                                             |
| GP:AF037448_1 Homo sapiens RRM RNA binding protein Gry-rbp (GRY-RBP) mRNA, complete cds; RRM RNA binding protein; Glycine, arginine and tyrosine-rich at C-terminus. [MASS=69633]/NS1 associated protein 1, component of the ApoB mRNA editosome involved in apolipoprotein B (APOB) mRNA editing, may bind RNA, may play a role in the regulation of mRNA splicing or transport from the nucleus                                                          |
| SW:CAS_HUMAN P55060 homo sapiens (human). cellular apoptosis susceptibility protein. 11/1997 [MASS=110314]/CSE1 chromosome segregation 1-like (yeast), importin-alpha nuclear export receptor, functions in toxin and TNF resistance and apoptosis, may regulate cell proliferation; corresponding gene is amplified in breast and colon carcinoma cell lines                                                                                              |
| SW:FXR2_HUMAN P51116 homo sapiens (human). fragile x mental retardation syndrome related protein 2. 10/1996 [MASS=74128]/Fragile X mental retardation gene autosomal homolog 2, binds mRNA, forms homomers or heteromers with FMR1 and FXR1, associates with the 60S ribosomal subunit and with actively translating polyribosomes, shuttles between the cytoplasm and nucleolus                                                                           |
| GP:D89729_1 Homo sapiens mRNA for CRM1 protein, complete cds. [MASS=123386]/Exportin 1, a cell cycle-regulated nuclear export receptor, mediates NES containing protein export from the nucleus, also involved in nuclear export of HIV1 RNA, may be required for autophagy                                                                                                                                                                                |
| SW:NTF2_HUMAN P13662 homo sapiens (human), and rattus norvegicus (rat). nuclear transport factor 2 (ntf-2) (placental protein 15) (pp15). 7/1999 [MASS=14478]/Nuclear transport factor 2, cytosolic protein involved in nuclear import of proteins containing nuclear localization signals mediated by GDP-RAN and nucleoporins                                                                                                                            |
| SW:ROA1_HUMAN P09651 homo sapiens (human). heterogeneous nuclear ribonucleoprotein a1 (helix-destabilizing protein) (single-strand binding protein) (hnmp core protein a1). 11/1997 [MASS=38715]/Heterogeneous nuclear ribonucleoprotein A1, an RNA-binding protein involved in mRNA splicing and translational control, undergoes nucleocytoplasmic shuttling possibly for mRNA export and telomerase recruitment; an autoantigen in autoimmune disorders |
| SW:FXR1_HUMAN P51114 homo sapiens (human). fragile x mental retardation syndrome related protein 1. 10/1996 [MASS=69692]/Fragile X mental retardation autosomal homolog 1, binds FMR1, associates with mRNPs and with 60S ribosomal subunits, may have a role in the ribosomal and RNA metabolism of neurons; identified as a scleroderma autoantigen processed during apoptosis                                                                           |
|                                                                                                                                                                                                                                                                                                                                                                                                                                                            |
| SW:IMA1_HUMAN P52294 homo sapiens (human). importin alpha-1 subunit (karyopherin alpha-1 subunit) (srp1-beta) (rag cohort protein 2) (nucleoprotein interactor 1) (npi-1). 12/1998 [MASS=60307]/Karyopherin alpha (importin alpha), a subunit of the nuclear localization sequence (NLS) receptor complex that binds to and mediates the nuclear import of RAG1 and STAT1                                                                                  |
| SW:ACLY_HUMAN P53396 homo sapiens (human). atp-citrate (pro-s-)-lyase (ec 4.1.3.8) (citrate cleavage enzyme). 10/1996 [MASS=121420]/ATP citrate lyase, catalyzes the formation of acetyl-CoA and oxaloacetate from citrate and CoA with the concomitant hydrolysis of ATP to ADP and phosphate, involved in cholesterol and fatty acid synthesis, nutritionally regulated                                                                                  |

|                                                                                                                                                                                                                                                                                                                                                                                                                                                                                                |
|------------------------------------------------------------------------------------------------------------------------------------------------------------------------------------------------------------------------------------------------------------------------------------------------------------------------------------------------------------------------------------------------------------------------------------------------------------------------------------------------|
| GP:AB007851_1 Homo sapiens mRNA for 41-kDa phosphoribosylpyrophosphate synthetase-associated protein, complete cds. [MASS=40926]/Phosphoribosyl pyrophosphate synthetase-associated protein 2, a component of phosphoribosylpyrophosphate (PRPP) synthetase that is related to the other components of PRPP synthetase (PRPS1, PRPS2 and PRPSAP1)                                                                                                                                              |
| GP:AB011173_1 Homo sapiens mRNA for KIAA0601 protein, partial cds. [MASS=96760]/KIAA0601 protein, a riboflavin-binding protein, member of a FAD dependent enzyme superfamily, component of the HDAC1 histone deacetylase complex, may be involved in gene silencing via covalent chromatin modification                                                                                                                                                                                        |
| SW:HS71_HUMAN P08107 homo sapiens (human). heat shock 70 kDa protein 1 (hsp70.1) (hsp70-1/hsp70-2). 5/2000 [MASS=70052]/Heat shock 70 kDa protein 1A, a member of the HSP70 chaperone family involved in protein folding, translocation, and complex assembly, blocks AU-rich mRNA decay by nuclear sequestering of AU-rich binding protein, may contribute to celiac disease                                                                                                                  |
| SW:PUR8_HUMAN P30566 homo sapiens (human). adenylosuccinate lyase (ec 4.3.2.2) (adenylosuccinase) (asl) (asase). 5/2000 [MASS=54889]/Adenylosuccinate lyase, catalyzes two steps in adenosine monophosphate biosynthesis; deficiency is associated with psychomotor retardation, epilepsy, and autism                                                                                                                                                                                          |
| SW:AMD2_HUMAN Q01433 homo sapiens (human). amp deaminase 2 (ec 3.5.4.6) (amp deaminase isoform I). 11/1997 [MASS=88198]/Adenosine monophosphate deaminase 2 (isoform L), catalyzes the deamination of adenosine monophosphate to form inosine monophosphate in purine nucleotide metabolism                                                                                                                                                                                                    |
| PIR2:S71460 ribose-phosphate pyrophosphokinase (EC 2.7.6.1) 39K regulatory chain - human [MASS=39480]/Phosphoribosyl pyrophosphate (PRPP) synthetase 1, generates PRPP, which is required for de novo purine and pyrimidine biosynthesis; mutations causing superactivity are associated with gout and neurological impairment                                                                                                                                                                 |
| SW:SYA_HUMAN P49588 homo sapiens (human). alanyl-trna synthetase (ec 6.1.1.7) (alanine--trna ligase) (alars). 7/1998 [MASS=106801]/Alanyl-tRNA synthetase, aminoacylates its cognate tRNA with alanine for protein biosynthesis, acts as an autoantigen in patients with polymyositis                                                                                                                                                                                                          |
| SWN:ENT1_HUMAN Q99808 homo sapiens (human). equilibrative nucleoside transporter 1 (equilibrative nitrobenzylmercaptopyrimidine riboside-sensitive nucleoside transporter) (equilibrative nbmpr-sensitive nucleoside transporter) [MASS=50088]/Solute carrier family 29 member 1 (equilibrative nucleoside transporter 1), functions in the transport of physiologic nucleosides and chemotherapeutic nucleoside analog drugs, inhibited by nitrobenzylthioinosine, dipyrindamole, and dilazep |
| SW:CST1_HUMAN Q05048 homo sapiens (human). cleavage stimulation factor, 50 kda subunit (cstf 50 kda subunit) (cf-1 50 kda subunit). 7/1998 [MASS=48358]/Cleavage stimulation factor subunit 1, the 50 kDa subunit of the cleavage stimulation factor complex required for pre-mRNA polyadenylation and 3'-end cleavage, interacts with BARD1 and the C-terminal domain of the RNA polymerase II large subunit                                                                                  |
| SW:SYQ_HUMAN P47897 homo sapiens (human). glutaminyl-trna synthetase (ec 6.1.1.18) (glutamine--trna ligase) (glnrs). 5/2000 [MASS=87799]/Glutaminyl-tRNA synthetase, aminoacylates cognate tRNAs with glutamine for protein biosynthesis, also suppresses FAS (TNFRSF6)-mediated apoptosis by inhibiting ASK1 (MAP3K5) kinase activity, contains N-terminal appended and C-terminal catalytic domains                                                                                          |
| SW:IMD2_HUMAN P12268 homo sapiens (human). inosine-5'-monophosphate dehydrogenase 2 (ec 1.1.1.205) (imp dehydrogenase 2) (impdh-ii) (impd 2). 5/2000 [MASS=55805]/Inosine monophosphate dehydrogenase type 2, catalyzes the oxidation of inosine monophosphate to xanthosine monophosphate in GTP biosynthesis, required for T cell activation, a target for immunosuppressive and anticancer chemotherapy                                                                                     |
| SW:PUR6_HUMAN P22234 homo sapiens (human). multifunctional protein ade2 [includes: phosphoribosylaminoimidazole-succinocarboxamide synthase (ec 6.3.2.6) (saicar synthetase); phosphoribosylaminoimidazol [MASS=47079]/SAICAR (phosphoribosylaminoimidazole-succinocarboxamide) synthetase and AIR (phosphoribosylaminoimidazole) carboxylase, a bifunctional protein required for de novo purine biosynthesis                                                                                 |
| SW:RINI_HUMAN P13489 homo sapiens (human). placental ribonuclease inhibitor (ribonuclease/angiogenin inhibitor) (rai) (ri). 12/1998 [MASS=49842]/Ribonuclease and angiogenin inhibitor, tightly binds and inhibits alkaline and neutral ribonucleases and angiogenin, functions in mRNA degradation and inhibition of HT-29 human colon adenocarcinoma cell binding to angiogenin (ANG)                                                                                                        |
| GP:AF132941_1 Homo sapiens CGI-07 protein mRNA, complete cds. [MASS=57585]/Protein with moderate similarity to S. cerevisiae Nmd3p, which is a protein involved in the nuclear export of 60S ribosomal subunits                                                                                                                                                                                                                                                                                |
| PIR2:A57017 RNase L inhibitor - human [MASS=67559]/Ribonuclease L inhibitor, inhibits the nuclease activity and 2-5A binding ability of RNase L, may be induced by HIV-1 to inhibit the 2-5A/RNase L pathway, can inhibit the antiviral activity of interferon when overexpressed                                                                                                                                                                                                              |
| SW:NPM_HUMAN P06748 homo sapiens (human). nucleophosmin (npm) (nucleolar phosphoprotein b23) (numatrin) (nucleolar protein no38). 5/2000 [MASS=32575]/Nucleophosmin (numatrin), a nucleic acid-binding phosphoprotein involved in apoptosis, abundant in tumor cells; gene fusion with anaplastic lymphoma kinase (ALK) is detected in non-Hodgkin's lymphoma and fusion with MLF1 is seen in acute myeloid leukemia                                                                           |
| SW:NDK6_HUMAN O60361 homo sapiens (human). putative nucleoside diphosphate kinase (ec 2.7.4.6) (ndk) (ndp kinase). 12/1998 [MASS=15529]/Nucleoside diphosphate kinase B, a transcription factor and endodeoxyribonuclease that binds to the Myc promoter, may function in DNA repair, may suppress metastasis in some tumors, displays reduced expression in breast carcinoma cells                                                                                                            |

|                                                                                                                                                                                                                                                                                                                                                                                                                                                                          |
|--------------------------------------------------------------------------------------------------------------------------------------------------------------------------------------------------------------------------------------------------------------------------------------------------------------------------------------------------------------------------------------------------------------------------------------------------------------------------|
| SW:PAB1_HUMAN P11940 homo sapiens (human). polyadenylate-binding protein 1 (poly(a) binding protein 1) (pabp 1). 7/1998 [MASS=70671]/Poly(A)-binding protein cytoplasmic 1, binds to poly(A) tails of mRNA and plays roles in regulating mRNA stability and translation, also implicated in mRNA transport from the nucleus to the cytoplasm                                                                                                                             |
| SWN:SYFB_HUMAN Q9nsd9 homo sapiens (human). phenylalanyl-trna synthetase beta chain (ec 6.1.1.20) (phenylalanine--trna ligase beta chain) (phers) (protein hspc173). 8/2001 [MASS=66130]/Phenylalanyl-tRNA synthetase beta-subunit, regulatory subunit that forms heterodimers with the catalytic alpha subunit (FARSL), involved in protein synthesis, may play a role in tumorigenic events                                                                            |
| SW:ROF_HUMAN P52597 homo sapiens (human). heterogeneous nuclear ribonucleoprotein f (hnmp f). 11/1997 [MASS=45672]/Heterogeneous nuclear ribonucleoprotein F, an RNA binding protein which contains quasi-RRMs (RNA recognition motifs) and plays a role in pre-mRNA splicing                                                                                                                                                                                            |
| PIR2:T13159 E1B-55kDa-associated protein - human [MASS=95810]/E1B-55kDa-associated protein 5, a heterogeneous nuclear ribonucleoprotein involved in nucleocytoplasmic transport of adenovirus and cellular mRNAs, binds adenovirus early 1B (E1B-55 kD) protein and may regulate viral oncogenic transformation                                                                                                                                                          |
| no_description_avail/Heterogeneous nuclear ribonucleoprotein R, a putative pre-mRNA processing protein that contains three RNA recognition domains and an RGG domain, interacts with survival motor neuron protein and is an autoantigen in autoimmune disease                                                                                                                                                                                                           |
| GP:U85625_1 Homo sapiens ribonuclease 6 precursor, mRNA, complete cds. [MASS=29481]/Ribonuclease 6 precursor, a putative ribonuclease that plays a role in the negative regulation of proliferation, may be involved in senescence, may be a class II tumor suppressor, downregulated in ovarian cancer and in ovarian cancer cell lines                                                                                                                                 |
| GP:AF037448_1 Homo sapiens RRM RNA binding protein Gry-rbp (GRY-RBP) mRNA, complete cds; RRM RNA binding protein; Glycine, arginine and tyrosine-rich at C-terminus. [MASS=69633]/NS1 associated protein 1, component of the ApoB mRNA editosome involved in apolipoprotein B (APOB) mRNA editing, may bind RNA, may play a role in the regulation of mRNA splicing or transport from the nucleus                                                                        |
| SW:PYR1_HUMAN P27708 homo sapiens (human). cad protein [includes: glutamine-dependent carbamoyl-phosphate synthase (ec 6.3.5.5); aspartate carbamoyltransferase (ec 2.1.3.2); dihydroorotase (ec 3.5.2.3)] [MASS=242917]/Carbamoylphosphate synthetase 2-aspartate transcarbamylase-dihydroorotase, a trifunctional enzyme that catalyzes the first three steps of pyrimidine biosynthesis                                                                               |
| SW:ROK_HUMAN Q07244 homo sapiens (human), and rattus norvegicus (rat). heterogeneous nuclear ribonucleoprotein k (hnmp k) (dc-stretch binding protein) (csbp) (transformation upregulated nuclear protein [MASS=50976]/Heterogeneous nuclear ribonucleoprotein K, a transcription factor which binds to poly(C) of RNA and DNA and is involved in RNA processing, gene transcription and translational controls, may induce apoptosis and play a role in viral infection |
| SW:SMD3_HUMAN P43331 homo sapiens (human). small nuclear ribonucleoprotein sm d3 (snrnp core protein d3) (sm-d3). 10/1996 [MASS=13916]/Small nuclear ribonucleoprotein D3, part of a multimeric complex involved in biogenesis of snRNPs and mRNA splicing, interacts with the spinal muscular atrophy disease protein (SMN); autoantigen for antibodies associated with systemic lupus erythematosus                                                                    |
| SW:PSS1_HUMAN P48651 homo sapiens (human). phosphatidylserine synthase i (serine-exchange enzyme i) (ec 2.7.8.-) (kiaa0024). 11/1997 [MASS=55528]/3'-phosphoadenosine 5'-phosphosulfate synthase 1, bifunctional polypeptide with ATP sulfurylase and adenosine 5'-phosphosulfate kinase activities, required for the synthesis of the sulfonate donor 3'-phosphoadenosine 5'-phosphosulfate                                                                             |
| SW:ROA0_HUMAN Q13151 homo sapiens (human). heterogeneous nuclear ribonucleoprotein a0 (hnmp a0). 5/2000 [MASS=30841]/Heterogeneous nuclear ribonucleoprotein A0, has triplet repeats, two consensus sequence-type RNA-binding domains, and a glycine-rich auxiliary domain, found in low abundance hnRNP complexes                                                                                                                                                       |
| SW:ROH1_HUMAN P31943 homo sapiens (human). heterogeneous nuclear ribonucleoprotein h (hnmp h). 11/1997 [MASS=49229]/Heterogeneous nuclear ribonucleoprotein H1, a pre-mRNA splicing factor that is a component of a complex that mediates post-transcriptional processing of primary transcripts                                                                                                                                                                         |
| SW:DDX1_HUMAN Q92499 homo sapiens (human). dead box protein 1 (dead box protein-retinoblastoma) (dbp-rb). 5/2000 [MASS=82432]/DEAD box protein 1, a member of the DEAD-H box ATP-dependent RNA helicase protein family, plays a role in the processing of pre-mRNAs, may interact with CSTF2; corresponding gene is coamplified with MYC in some neuroblastoma and retinoblastoma cell lines                                                                             |
| PIR2:JW0079 heterogeneous nuclear ribonucleoprotein homolog JKTBP [imported] - human [MASS=33589]/Heterogeneous nuclear ribonucleoprotein D-like, an RNA- and DNA-binding protein that may play a role in mRNA biogenesis                                                                                                                                                                                                                                                |
| GP:AC003972_1 Homo sapiens DNA from chromosome 19, cosmid R33485 containing pNORF1, complete sequence; human type 1 RNA helicase; DPS similarity to (U59323) type 1 RNA helicase pNORF1 [Homo sapiens]; Score. [MASS=123036]/regulator of nonsense transcripts 1 (nonsense mrna reducing factor 1) (norf1) (up-frameshift suppressor 1 homolog). 10/2001 [MASS=124345]                                                                                                   |
| SW:RUXF_HUMAN Q15356 homo sapiens (human). small nuclear ribonucleoprotein f (snrnp-f) (sm protein f). 7/1999 [MASS=9725]/Sm protein F, a spliceosomal snRNA-associated Sm core protein that is involved in the biogenesis of the snRNPs; a target of autoantibodies in patients with the autoimmune disease systemic lupus erythematosus                                                                                                                                |
| GP:AF177344_1 Homo sapiens clone HC90 unknown mRNA. [MASS=30998]/ weakly similar to a methyltransferase/Member of the RNA methyltransferase family, which catalyze 2'-O-methylation of ribose groups in R                                                                                                                                                                                                                                                                |

|                                                                                                                                                                                                                                                                                                                                                                                                                                                                    |
|--------------------------------------------------------------------------------------------------------------------------------------------------------------------------------------------------------------------------------------------------------------------------------------------------------------------------------------------------------------------------------------------------------------------------------------------------------------------|
| <p>PIR2:T09073 splicing factor Sip1 - human [MASS=128875]/Splicing factor arginine serine rich 2 interacting protein, a SR domain family protein that interacts with the RNA polymerase II C-terminal domain and several splicing factors, is essential in mRNA splicing and possibly spliceosome A-complex formation</p>                                                                                                                                          |
| <p>PIR2:I55595 splicing factor - human [MASS=58657]/Splicing factor CC1.3, a novel nuclear protein and putative member of the SR family of alternative splicing factors; target of autoantibodies from a patient with hepatocellular carcinoma</p>                                                                                                                                                                                                                 |
| <p>PIR2:S78046 ribonuclease 6 (EC 3.1.27.-) precursor - human [MASS=21941]/Ribonuclease k6, a ribonuclease of the ribonuclease A superfamily, possibly functions in host defense</p>                                                                                                                                                                                                                                                                               |
| <p>SW:DRN2_HUMAN O00115 homo sapiens (human). deoxyribonuclease ii precursor (ec 3.1.22.1) (dnase ii) (acid dnase) (lysosomal dnase ii) (r31240_2). 7/1999 [MASS=39581]/Deoxyribonuclease II lysosomal, an acid-activated DNA nicking enzyme, may participate in DNA fragmentation during apoptosis, induces apoptotic chromosome condensation when transfected into cell lines</p>                                                                                |
| <p>SW:SMD2_HUMAN P43330 homo sapiens (human). small nuclear ribonucleoprotein sm d2 (snrnp core protein d2) (sm-d2). 10/1996 [MASS=13527]/Small nuclear ribonucleoprotein D2 polypeptide, one of seven common core snRNP proteins involved in snRNP biogenesis and pre-mRNA splicing, autoantigen for anti-Sm antibodies produced by individuals with systemic lupus erythematosus</p>                                                                             |
| <p>SW:U2AF_HUMAN P26368 homo sapiens (human). splicing factor u2af 65 kda subunit (u2 auxiliary factor 65 kda subunit) (u2 snrnp auxiliary factor large subunit). 12/1998 [MASS=53501]/U2 small nuclear ribonucleoprotein auxiliary factor (65 kDa), a component of U2 small nucleoprotein auxiliary factor, which is necessary for mRNA splicing, binds to pre-mRNA</p>                                                                                           |
| <p>GP:D21163_1 Human mRNA for KIAA0031 gene, complete cds; similar to human elongation factor 2 mRNA (HSEF2).. [MASS=109436]/U5 snRNP-specific protein 116 kD, a spliceosome component with GTPase activity, plays a role in mRNA splicing and processing</p>                                                                                                                                                                                                      |
| <p>SW:RU17_HUMAN P08621 homo sapiens (human). u1 small nuclear ribonucleoprotein 70 kda (u1 snrnp 70 kda) (snrp70). 11/1995 [MASS=70081]/U1 small nuclear 70 kDa ribonucleoprotein, involved in pre mRNA splicing, acts as an autoantigen in systemic lupus erythematosus and mixed connective tissue disease</p>                                                                                                                                                  |
| <p>PIR2:A54601 RNA-binding protein AUF1 - human [MASS=31200]/Heterogeneous nuclear ribonucleoprotein D (AU-rich element RNA-binding protein 1 37kD), an RNA and DNA-binding protein which binds to AU-rich elements in the 3' untranslated regions of mRNAs and mediates their degradation</p>                                                                                                                                                                     |
| <p>SW:NHPX_HUMAN P55769 homo sapiens (human). nhp2/rs6 family protein yel026w homolog (high mobility group-like nuclear protein 2 homolog) (otk27). 5/2000 [MASS=14174]/Non-histone chromosome protein 2 (S. cerevisiae)-like 1, a member of a family of RNP-associated proteins, a component of the spliceosome and rRNA processing machinery, recognizes a shared stem-internal loop-stem structure in its RNA targets</p>                                       |
| <p>SW:DDX5_HUMAN P17844 homo sapiens (human). probable rna-dependent helicase p68 (dead-box protein p68) (dead box protein 5). 7/1998 [MASS=69148]/DEAD/H (Asp-Glu-Ala-Asp/His) box polypeptide 5 (RNA helicase 68kD), a ATP-dependent RNA helicase that has ATP-independent RNA renaturation activity and catalyses branch migration, binds estrogen receptor alpha and function as a transcriptional coactivator</p>                                             |
| <p>SW:U2AG_HUMAN Q01081 homo sapiens (human). splicing factor u2af 35 kda subunit (u2 auxiliary factor 35 kda subunit) (u2 snrnp auxiliary factor small subunit). 12/1998 [MASS=27872]/U2(RNU2) small nuclear RNA auxiliary factor 1, functions as a pre-mRNA splicing protein, involved in the functional recognition of the 3' splice site AG dinucleotide, interacts with ZNF265 protein involved in alternative splicing</p>                                   |
| <p>SW:ROU_HUMAN Q00839 homo sapiens (human). heterogenous nuclear ribonucleoprotein u (hnrnp u) (scaffold attachment factor a) (saf-a). 5/2000 [MASS=90479]/Heterogeneous nuclear ribonucleoprotein U (scaffold attachment factor A), binds RNA, binds EP300 in a complex that binds scaffold-matrix attachment regions of TOP1, involved in chromatin structure, apoptosis, and perhaps RNA processing and transcription</p>                                      |
| <p>SW:ROA1_HUMAN P09651 homo sapiens (human). heterogeneous nuclear ribonucleoprotein a1 (helix-destabilizing protein) (single-strand binding protein) (hnrnp core protein a1). 11/1997 [MASS=38715]/Heterogeneous nuclear ribonucleoprotein A1, an RNA-binding protein involved in mRNA splicing and translational control, undergoes nucleocytoplasmic shuttling possibly for mRNA export and telomerase recruitment; an autoantigen in autoimmune disorders</p> |
| <p>SW:DD17_HUMAN Q92841 homo sapiens (human). probable rna-dependent helicase p72 (dead-box protein p72) (dead box protein 17). 5/2000 [MASS=72371]/DEAD H box protein 17, a member of the DEAD box family of RNA-dependent ATPases and ATP-dependent RNA helicases, a component of an estrogen receptor alpha (ESR) transcriptional coactivator complex</p>                                                                                                       |
| <p>SW:Y017_HUMAN Q15393 homo sapiens (human). hypothetical protein kiaa0017. 5/2000 [MASS=44606]/ Homo sapiens mRNA for SAP 130 spliceosomal protein/Splicing factor 3b subunit 3, a component of the U2 snRNP-associated protein complex SF3b that plays a role in spliceosome assembly, interacts with STAGA and TFTC complexes implicated in DNA repair, chromatin modification, and transcription</p>                                                          |
| <p>SW:NR54_HUMAN Q15233 homo sapiens (human). 54 kda nuclear rna-binding protein (p54(nrb)) (p54nrb) (55 kda nuclear protein) (nmt55). 5/2000 [MASS=54232]/Non-POU-domain-containing octamer-binding nuclear protein, binds DNA and RNA, and implicated in transcription and pre-mRNA splicing; a fusion partner with TFE3 in papillary renal cell carcinoma</p>                                                                                                   |
| <p>SW:SFR7_HUMAN Q16629 homo sapiens (human). splicing factor, arginine/serine-rich 7 (splicing factor 9g8). 5/2000 [MASS=27367]/Splicing factor arginine serine rich 7, a splicing factor of the SR protein family containing an RNA binding domain (RBD) and a serine/arginine (SR) domain that is implicated in alternative pre-mRNA splicing</p>                                                                                                               |



|                                                                                                                                                                                                                                                                                                                                                                                                                                                                                  |
|----------------------------------------------------------------------------------------------------------------------------------------------------------------------------------------------------------------------------------------------------------------------------------------------------------------------------------------------------------------------------------------------------------------------------------------------------------------------------------|
| <p>SW:TRFL_HUMAN P02788 homo sapiens (human). lactotransferrin precursor (lactoferrin). 7/1999 [MASS=78338]/Lactotransferrin, a member of the transferrin family, transports iron in extracellular fluid and may have serine protease activity, has antimicrobial, antifungal, and antiviral activity, potential therapeutic or diagnostic target for autoimmune diseases</p>                                                                                                    |
| <p>SW:SAH2_HUMAN O43865 homo sapiens (human). putative adenosylhomocysteinase (ec 3.3.1.1) (s-adenosyl-l-homocysteine hydrolase) (adohcycase). 12/1998 [MASS=55628]/Protein with high similarity to s-adenosylhomocysteine hydrolase (mouse Ahcy), which reversibly converts S-adenosylhomocysteine to adenosine and homocysteine and may be associated with epilepsy, member of the S-adenosylhomocysteine hydrolase family</p>                                                 |
| <p>SW:COMT_HUMAN P21964 homo sapiens (human). catechol o-methyltransferase, membrane-bound form (ec 2.1.1.6) (mb-comt) [contains: catechol o-methyltransferase, soluble form (s-comt)]. 5/2000 [MASS=30037]/Catechol-O-methyltransferase, a methyltransferase involved in the degradation of catecholamine neurotransmitters and catechol drugs, variant forms are associated with increased risks for obsessive-compulsive disorder and schizophrenia</p>                       |
| <p>SW:ESTD_HUMAN P10768 homo sapiens (human). esterase d (ec 3.1.1.1). 5/2000 [MASS=31463]/Esterase D (formylglutathione hydrolase), a carboxylesterase that may be involved in detoxification</p>                                                                                                                                                                                                                                                                               |
| <p>SW:GLNA_HUMAN P15104 homo sapiens (human). glutamine synthetase (ec 6.3.1.2) (glutamate--ammonia ligase). 12/1998 [MASS=42064]/Glutamine synthase, catalyzes the condensation of glutamate and ammonia to form glutamine, may clear L-glutamate from synapses, reduced expression in the brain and abnormal presence in cerebral spinal fluid is associated with Alzheimer disease</p>                                                                                        |
| <p>SW:MRP1_HUMAN P33527 homo sapiens (human). multidrug resistance-associated protein 1. 5/2000 [MASS=171561]/ATP-binding cassette subfamily C member 1 (multiple drug resistance protein 1), an ATP-binding cassette transporter that acts as a multidrug efflux pump conferring resistance to lipophilic drugs and chemotherapeutic agents</p>                                                                                                                                 |
| <p>PIR2:T46412 ubiquitin--protein ligase (EC 6.3.2.19) NEDD4 - human (fragment) [MASS=95283]/Neural cell precursor expressed developmentally downregulated 4, ubiquitin-protein ligase with multiple WW domains, binds to and reduces the activity of epithelial sodium channels, may play a role in neural differentiation, regulated by kinase SGK</p>                                                                                                                         |
| <p>GP:AC005545_2 Homo sapiens chromosome 19, cosmid R26634, complete sequence; vesicle coat component, similar to alpha and gamma adaptins. [MASS=121170]/Adaptor-related protein complex 3 delta 1 subunit, a component of the AP-3 complex, involved in intracellular vesicle transport</p>                                                                                                                                                                                    |
| <p>SW:PUR6_HUMAN P22234 homo sapiens (human). multifunctional protein ade2 [includes: phosphoribosylaminoimidazole-succinocarboxamide synthase (ec 6.3.2.6) (saicar synthetase); phosphoribosylaminoimidazol [MASS=47079]/SAICAR (phosphoribosylaminoimidazole-succinocarboxamide) synthetase and AIR (phosphoribosylaminoimidazole) carboxylase, a bifunctional protein required for de novo purine biosynthesis</p>                                                            |
| <p>SW:PON2_HUMAN Q15165 homo sapiens (human). serum paraoxonase/arylesterase 2 (ec 3.1.1.2) (ec 3.1.8.1) (pon 2) (serum aryldiacylphosphatase 2) (a-esterase 2) (aromatic esterase 2). 7/1999 [MASS=39398]/Paraoxonase 2 (arylesterase 2), an antioxidant that protects low density lipoprotein against peroxidation, member of a family of proteins that hydrolyze toxic organophosphates; gene mutations are associated with an increased risk of coronary heart disease</p>   |
| <p>SW:DOPD_HUMAN P30046 homo sapiens (human). d-dopachrome tautomerase (phenylpyruvate tautomerase ii). 5/2000 [MASS=12581]/D-dopachrome tautomerase, a tyrosinase-related zinc metalloenzyme that catalyzes the conversion of D-dopachrome to 5,6-dihydroxyindole in the melanin biosynthetic pathway, specifically expressed in melanin-producing cells, and is a melanoma tumor antigen</p>                                                                                   |
| <p>SW:HEMZ_HUMAN P22830 homo sapiens (human). ferrochelatase precursor (ec 4.99.1.1) (protoheme ferro-lyase) (heme synthetase). 12/1998 [MASS=47834]/Ferrochelatase (protoheme ferrochelatase), catalyzes the final step in the heme biosynthetic pathway by inserting ferrous iron into protoporphyrin IX to form heme; reduced activity and mutations in the corresponding gene are associated with protoporphyria</p>                                                         |
| <p>GP:AF126782_1 Homo sapiens retinal short-chain dehydrogenase/reductase retSDR4 mRNA, complete cds. [MASS=32268]/Short-chain dehydrogenase-reductase 1, catalyzes the NADPH-dependent reduction of all-trans-retinal to retinol, may play a role in visual system phototransduction; the corresponding gene is deleted in many neuroblastoma cell lines with MYCN amplification</p>                                                                                            |
| <p>SW:A4_HUMAN P05067 homo sapiens (human). alzheimer's disease amyloid a4 protein precursor (protease nexin-ii) (pn-ii) (appi) [contains: beta-amyloid protein (beta-app) (a-beta)]. 5/2000 [MASS=86943]/Amyloid beta (A4) precursor protein, cell surface protease inhibitor that reduces copper, deposits of proteolytic peptide products are found in Alzheimer's disease and Down syndrome brains, deficiency is associated with early-onset Alzheimer's disease</p>        |
| <p>SW:FLRE_HUMAN P30043 homo sapiens (human). flavin reductase (ec 1.6.99.1) (flr) (nadph-dependent diaphorase) (nadph-flavin reductase) (flr) (biliverdin reductase b) (ec 1.3.1.24) (bvr-b) (biliverdin-ix b [MASS=21988]/Biliverdin-IX beta reductase (NADPH-flavin reductase), catalyzes the conversion of biliverdin-IX beta to bilirubin-IX beta, the major heme catabolite produced during early fetal development; also has NAD(P)H-linked flavin reductase activity</p> |
| <p>SW:HYEP_HUMAN P07099 homo sapiens (human). epoxide hydrolase (ec 3.3.2.3) (microsomal epoxide hydrolase) (epoxide hydratase). 10/1996 [MASS=52949]/Microsomal epoxide hydrolase, hydrates reactive epoxides to form dihydrodiols, detoxifies cytochrome p450-generated epoxides from the metabolism of xenobiotics; polymorphisms of the gene may affect risk of cancer, lung disease, and preeclampsia</p>                                                                   |

|                                                                                                                                                                                                                                                                                                                                                                                                                                                                                            |
|--------------------------------------------------------------------------------------------------------------------------------------------------------------------------------------------------------------------------------------------------------------------------------------------------------------------------------------------------------------------------------------------------------------------------------------------------------------------------------------------|
| SW:PEBP_HUMAN P30086 homo sapiens (human). phosphatidylethanolamine-binding protein (pebp) (neuropolypeptide h3). 7/1999 [MASS=20926]/Phosphatidylethanolamine-binding protein, binds GTP, may regulate cAMP accumulation, enhance acetylcholine synthesis, and play a role in organizing phospholipids in the myelin sheath                                                                                                                                                               |
| SW:IPYR_HUMAN Q15181 homo sapiens (human). inorganic pyrophosphatase (ec 3.6.1.1) (pyrophosphate phosphohydrolase) (ppase). 5/2000 [MASS=32660]/Inorganic pyrophosphatase, catalyzes the hydrolysis of pyrophosphate to inorganic phosphate                                                                                                                                                                                                                                                |
| SW:TRSR_HUMAN P02786 homo sapiens (human). transferrin receptor protein (tr) (antigen cd71) (t9) (p90). 7/1999 [MASS=84901]/Transferrin receptor, binds and internalizes the iron carrier transferrin, involved in iron homeostasis, important for neurologic development and likely erythropoiesis, expression is deregulated in anemia, hemochromatosis, and Friedreich's ataxia                                                                                                         |
| SW:DYL1_HUMAN Q15701 homo sapiens (human), mus musculus (mouse), rattus norvegicus (rat), and oryctolagus cuniculus (rabbit). dynein light chain 1, cytoplasmic (protein inhibitor of neuronal nitric oxid [MASS=10366]/Dynein cytoplasmic light polypeptide (protein inhibitor of nitric oxide synthase), a component of the cytoplasmic dynein motor complex, inhibits neuronal nitric oxide synthase (NOS1), regulates the proapoptotic activity of BCL2-interacting protein BCL2L11    |
| PIR2:I37405 polypeptide N-acetylgalactosaminyltransferase (EC 2.4.1.41) - human [MASS=64733]/N-acetylgalactosaminyltransferase T1, enzyme that initiates O-glycosylation; inhibition affects the sensitivity of tumors cells to immune killer cells                                                                                                                                                                                                                                        |
| SW:OGT1_HUMAN O15294 homo sapiens (human). udp-n-acetylglucosamine-peptide n-acetylglucosaminyltransferase 100 kda subunit (ec 2.4.1.-) (o-glcnac transferase p100 subunit). 5/2000 [MASS=103012]/O-linked N-acetylglucosamine transferase (UDP-N-acetylglucosamine:polypeptide-N-acetylglucosaminyltransferase), enzyme that functions in O-glycosylation, may be involved in insulin secretion and glucose homeostasis, may play a role in signal transduction                           |
| SW:MMSA_HUMAN Q02252 homo sapiens (human). methylmalonate-semialdehyde dehydrogenase [acylating] (ec 1.2.1.27) (mmsdh) (fragment). 12/1998 [MASS=46606]/Methylmalonate-semialdehyde dehydrogenase (2-methyl-3-oxopropanoate:NAD+ oxidoreductase (CoA-propanoylating)), a member of the aldehyde dehydrogenase superfamily; deficiency is associated with developmental delay                                                                                                               |
| SW:AOFB_HUMAN P27338 homo sapiens (human). amine oxidase [flavin-containing] b (ec 1.4.3.4) (monoamine oxidase) (mao-b). 12/1998 [MASS=58763]/Monoamine oxidase B, an oxidase involved in the metabolism of various biologically important amines such as dopamine, requires covalently bound FAD as a cofactor, may play a role in aging and behavior                                                                                                                                     |
| SW:C1TC_HUMAN P11586 h c-1-tetrahydrofolate synthase, cytoplasmic (c1-thf synthase) [includes: methylenetetrahydrofolate dehydrogenase (ec 1.5.1.5); methylenetetrahydrofolate cyclohydrolase (ec 3.5.4.9); [MASS=101428]/C1-Tetrahydrofolate synthase, a trifunctional enzyme with 10-formyltetrahydrofolate synthetase, 5,10-methylenetetrahydrofolate cyclohydrolase, and 5,10-methylenetetrahydrofolate dehydrogenase activities; mutation associated with risk of neural tube disease |
| SW:FRIH_HUMAN P02794 homo sapiens (human). ferritin heavy chain (ferritin h subunit). 7/1999 [MASS=21094]/Ferritin heavy polypeptide 1, a ferrioxidase involved in iron storage, heme biosynthesis, cell growth, oxidative stress response, and transcription, may play a role in iron transport, apoptosis, cell differentiation, and response to bacteria                                                                                                                                |
| (human). amine oxidase [flavin-containing] a (ec 1.4.3.4) (monoamine oxidase) (mao-a). 12/1998 [MASS=59682]/Monoamine oxidase A, an enzyme involved in degradation of amine neurotransmitters, may be associated with neuropsychiatric disorders, including impulsive aggression and panic disorder, and Parkinson disease                                                                                                                                                                 |
| GP:AF277719_1 Homo sapiens 3 beta-hydroxy-delta 5-C27-steroid oxidoreductase mRNA, complete cds. [MASS=40930]/3 beta-hydroxy-delta 5-C27-steroid oxidoreductase, predicted to function in bile acid biosynthesis; variant form is associated with progressive intrahepatic cholestasis                                                                                                                                                                                                     |
| SW:SPHM_HUMAN P51688 homo sapiens (human). n-sulphoglucosamine sulphohydrolase precursor (ec 3.10.1.1) (sulfoglucosamine sulfamidase) (sulphamidase). 5/2000 [MASS=56695]/N-sulfoglucosamine sulfohydrolase (sulfamidase), catalyzes the hydrolysis of the N-linked sulfate group from heparan sulfate; mutation of the corresponding gene causes the lysosomal storage disease Sanfilippo A syndrome (mucopolysaccharidosis type IIIA)                                                    |
| GP:X92689_1 Homo sapiens mRNA for UDP-GalNAc:polypeptide N-acetylgalactosaminyl transferase (GalNAc-T3). [MASS=72638]/N-acetylgalactosaminyltransferase T3 (UDP-N-acetyl-alpha-D-galactosamine:polypeptide N-acetylgalactosaminyltransferase 3), enzyme that initiates O-glycosylation; elevated levels may be associated with differentiation of adenocarcinomas                                                                                                                          |
| SW:ATCK_HUMAN P98194 homo sapiens (human). calcium-transporting atpase 2c1 (ec 3.6.1.38) (atp-dependent ca2+ pump pmr1). 5/2000 [MASS=100606]/ATPase (Ca2+ transporting) type 2c member 1, a Ca2+-transporting P-type ATPase involved in Ca2+ homeostasis that may also play a role in epidermal differentiation; mutations in the gene cause Hailey-Hailey disease, a blistering skin disease                                                                                             |
| peroxisomal 2,4-dienoyl-CoA reductase /2,4-dienoyl-CoA reductase, an auxiliary beta-oxidation enzyme of the mitochondrion that participates in the metabolism of unsaturated fatty enoyl-CoA esters with double bonds in both odd- and even-numbered positions                                                                                                                                                                                                                             |
| SW:SORC_HUMAN P30626 homo sapiens (human). sorcin (22 kda protein) (cp-22) (v19). 11/1997 [MASS=21676]/Sorcin, an EF-hand calcium-binding protein, may be involved in multidrug resistance, a potential modulator of intracellular calcium levels through interaction with the ryanodine receptor                                                                                                                                                                                          |

|                                                                                                                                                                                                                                                                                                                                                                                                                                               |
|-----------------------------------------------------------------------------------------------------------------------------------------------------------------------------------------------------------------------------------------------------------------------------------------------------------------------------------------------------------------------------------------------------------------------------------------------|
| <p>SW:IPYR_HUMAN Q15181 homo sapiens (human). inorganic pyrophosphatase (ec 3.6.1.1) (pyrophosphate phospho-hydrolase) (ppase). 5/2000 [MASS=32660]/Inorganic pyrophosphatase, catalyzes the hydrolysis of pyrophosphate to inorganic phosphate</p>                                                                                                                                                                                           |
| <p>SW:RO60_HUMAN P10155 homo sapiens (human). 60 kda ro protein (60 kda ribonucleoprotein ro) (rornp) (sjogren syndrome type a antigen (ss-a)). 2/1996 [MASS=60643]/Sjogren syndrome antigen A2, RNA-binding protein that is a component of ribonucleoprotein complexes in association with small cytoplasmic Y RNAs, an autoantigen in systemic rheumatic diseases such as lupus and Sjogren syndrome</p>                                    |
| <p>SW:PRS8_HUMAN P47210 homo sapiens (human). 26s protease regulatory subunit 8 (proteasome subunit p45) (thyroid hormone receptor interacting protein 1) (trip1). 11/1997 [MASS=45653]/ATPase subunit 5 of the 26S proteasome, which is a multicatalytic proteinase complex involved in cellular protein degradation; may also function as a transcriptional modulator</p>                                                                   |
| <p>SW:PLAK_HUMAN P14923 homo sapiens (human). junction plakoglobin (desmoplakin iii). 11/1997 [MASS=81498]/Junction plakoglobin (gamma catenin), links cell-cell adhesion molecules with the cytoskeleton, involved in desmosome organization, cell adhesion, cell proliferation, apoptosis; loss of heterozygosity is associated with breast and ovarian tumors</p>                                                                          |
| <p>GP:BC000441_1 Homo sapiens, junction plakoglobin, clone MGC:8404 IMAGE:2820715, mRNA, complete cds. [MASS=81727]/Junction plakoglobin (gamma catenin), links cell-cell adhesion molecules with the cytoskeleton, involved in desmosome organization, cell adhesion, cell proliferation, apoptosis; loss of heterozygosity is associated with breast and ovarian tumors</p>                                                                 |
| <p>SW:CTNB_HUMAN P35222 homo sapiens (human). beta-catenin. 2/1996 [MASS=85497]/Beta catenin, links cadherins to the cytoskeleton, may act as a component of the Wnt signal transduction pathway transmitting nuclear signals via a complex with LEF1 and TCF transcription factors; mutations in the gene are associated with various cancers</p>                                                                                            |
| <p>SW:HIP_HUMAN P50502 homo sapiens (human). hsc70-interacting protein (progesterone receptor-associated p48 protein) (putative tumor suppressor st13). 5/2000 [MASS=41332]/Suppression of tumorigenicity 13 (Hsp70-interacting protein), acts as an Hsc70 cochaperone, contains tetratricopeptide repeats, participates in protein complex assembly, heat shock response, and lysosomal transport; downregulated in colorectal carcinoma</p> |
| <p>PIR2:T46412 ubiquitin--protein ligase (EC 6.3.2.19) NEDD4 - human (fragment) [MASS=95283]/Neural cell precursor expressed developmentally downregulated 4, ubiquitin-protein ligase with multiple WW domains, binds to and reduces the activity of epithelial sodium channels, may play a role in neural differentiation, regulated by kinase SGK</p>                                                                                      |
| <p>SW:BTF3_HUMAN P20290 homo sapiens (human). transcription factor btf3 (rna polymerase b transcription factor 3). 12/1998 [MASS=22168]/Basic transcription factor 3, a general transcription factor that forms a stable complex with RNA polymerase II and is required for transcriptional initiation by RNA polymerase II, and may be a substrate for protein kinase CK2 (CSNK2B)</p>                                                       |
| <p>SW:ENOA_HUMAN P06733 homo sapiens (human). alpha enolase (ec 4.2.1.11) (2-phospho-d-glycerate hydro-lyase) (non-neural enolase) (nne) (phosphopyruvate hydratase). 7/1998 [MASS=47038]/Enolase 1 (alpha enolase), converts 2-phospho-D-glycerate to phosphoenolpyruvate in glycolysis, an autoantigen in multiple autoimmune diseases, shorter alternative form c-myc promoter binding protein (MPB1) is a transcriptional repressor</p>   |
| <p>SW:TCPD_HUMAN P50991 homo sapiens (human). t-complex protein 1, delta subunit (tcp-1-delta) (cct-delta) (stimulator of tar rna binding). 5/2000 [MASS=57839]/Chaperonin containing T-complex 1 subunit 4 (delta), part of a cytosolic hexadecamer structure involved in ATP-dependent folding of actin, tubulin and other proteins</p>                                                                                                     |
| <p>SWN:PREB_HUMAN Q9hcu5 homo sapiens (human). prolactin regulatory element-binding protein. 3/2002 [MASS=45502]/Prolactin regulatory element binding protein, transcriptional activator, member of the WD-repeat protein family, may have a role in development; chromosomal location of the gene makes this a candidate for the gene mutated in partial trisomy 2p syndrome</p>                                                             |
| <p>SW:CRTC_HUMAN P27797 homo sapiens (human). calreticulin precursor (crp55) (calregulin) (hacbp) (erp60) (52 kda ribonucleoprotein autoantigen ro/ss-a). 7/1998 [MASS=48142]/Calreticulin, an ER-resident Ca2+-binding protein and lectin-binding chaperone involved in protein folding, Ca2+ homeostasis, cell adhesion, and integrin signaling; anti-angiogenic fragment, vasostatin, is a potential anti-cancer agent</p>                 |
| <p>SW:TF1B_HUMAN Q13263 homo sapiens (human). transcription intermediary factor 1-beta (nuclear corepressor kap-1) (krab-associated protein 1). 7/1999 [MASS=88550]/KRAB associated protein 1, a member of the transcriptional intermediary factor 1 (TIF1) gene family, acts as a transcriptional corepressor to silence heterochromatin, and as a co-activator in association with HP1-type chromodomain-containing proteins</p>            |
| <p>PIR2:JE0334 nuclear matrix protein NMP 238 - human [MASS=50228]/RuvB like 1, a member of the TIP49 family of proteins, a nuclear protein which contains ATPase-helicase motifs, may interact with the transactivation domain of c-myc (MYC)</p>                                                                                                                                                                                            |
| <p>GP:AB006572_1 Homo sapiens RMP mRNA for RPB5 mediating protein, complete cds. [MASS=56764]/RPB5-mediating protein, binds to and negatively regulates the function of RNA polymerase II subunit 5 (POLR2E), inhibits transcriptional activation by hepatitis B virus X protein; marker for Reed Sternberg cells in Hodgkin disease</p>                                                                                                      |

|                                                                                                                                                                                                                                                                                                                                                                                                                                                                 |
|-----------------------------------------------------------------------------------------------------------------------------------------------------------------------------------------------------------------------------------------------------------------------------------------------------------------------------------------------------------------------------------------------------------------------------------------------------------------|
| GP:AF000560_1 Homo sapiens TTF-I interacting peptide 20 mRNA, partial cds; TIP20; Transcription Termination Factor I Interacting Peptide 20. [MASS=40770]/TTF-I interacting peptide 20, a protein that contains a putative nucleic acid-binding C2H2 type zinc finger domain                                                                                                                                                                                    |
| GP:AF084523_1 Homo sapiens cellular repressor of E1A-stimulated genes CREG mRNA, complete cds. [MASS=24075]/Repressor of transcriptional activation and transformation by the adenovirus E1A protein, binds the general transcription factor TBP and the tumor suppressor pRb (RB1), involved in transcriptional control of cell growth and differentiation                                                                                                     |
| SW:P2BA_HUMAN Q08209 homo sapiens (human). serine/threonine protein phosphatase 2b catalytic subunit, alpha isoform (ec 3.1.3.16) (calmodulin-dependent calcineurin a subunit, alpha isoform) (cam-prp cat [MASS=58688]/Calcineurin A alpha, catalytic subunit of calcium/calmodulin regulated protein phosphatase, regulates activity of transcription factors involved in signal transduction and growth control                                              |
| PIR2:I59405 RNA polymerase II transcription factor SIII p18 subunit - human [MASS=13133]/Transcription elongation factor B (SIII) polypeptide 2, a subunit of the elongin complex that facilitates RNA polymerase II elongation, component of a ubiquitin ligase complex that stabilizes and enhances the tumor suppressor action of the VHL protein                                                                                                            |
| SW:PPOL_HUMAN P09874 homo sapiens (human). poly [adp-ribose] polymerase (ec 2.4.2.30) (parp) (adprt) (nad(+) adp-ribosyltransferase) (poly[adp-ribose] synthetase). 11/1997 [MASS=112953]/ADP-ribosyltransferase, catalyzes formation of ADP ribose polymers attached to proteins using NAD(+) as substrate in response to DNA damage, modulates chromatin structure and plays a role in DNA repair and apoptosis                                               |
| SW:APE1_HUMAN P27695 homo sapiens (human). dna-(apurinic or apyrimidinic site) lyase (ec 4.2.99.18) (ap endonuclease 1) (apex nuclease) (apen) (ref-1 protein). 12/1998 [MASS=35423]/Apurinic/apyrimidinic endonuclease 1, multifunctional DNA repair enzyme that coordinates the repair of abasic sites and repair synthesis, acts as a transcription regulator; mutations may correlate with inclusion body myositis and colorectal tumorigenesis             |
| SW:CNBP_HUMAN P20694 homo sapiens (human), and rattus norvegicus (rat). cellular nucleic acid binding protein (cnbp). 11/1997 [MASS=19463]/Zinc-finger protein that binds to sterol regulatory element (SRE) and may function in sterol-mediated repression of genes encoding the low density lipoprotein receptor and enzymes of the cholesterol biosynthetic pathway                                                                                          |
| GP:AF007833_1 Homo sapiens kruppel-related zinc finger protein hcKrox mRNA, complete cds; zinc-finger transcription factor. [MASS=58218]/c-Krox, a zinc-finger domain-containing transcription factor that regulates transcription from the alpha 1(I) procollagen (COL1A1) and fibronectin (FN1) promoters, may play a role in regulating bone formation                                                                                                       |
| SW:RFA1_HUMAN P27694 homo sapiens (human). replication protein a 70 kda dna-binding subunit (rp-a) (rf-a) (replication factor-a protein 1) (single-stranded dna-binding protein). 11/1997 [MASS=68138]/Replication protein A1 (70 kDa), a DNA replication factor A subunit, has roles in DNA replication, recombination, repair, may contribute to latent virus reactivation, inactivated by anti-cancer drug adozelesin                                        |
| SW:MAZ_HUMAN P56270 homo sapiens (human). myc-associated zinc finger protein (mazi) (purine-binding transcription factor) (pur-1) (zf87) (zif87). 7/1999 [MASS=48608]/MYC-associated zinc finger protein (purine-binding transcription factor), functions both as a positive and a negative regulator of gene expression and may also have roles in initiating and terminating transcription                                                                    |
| SW:PUR_HUMAN Q00577 homo sapiens (human). transcriptional activator protein pur-alpha (purine-rich single-stranded dna-binding protein alpha). 7/1998 [MASS=34911]/Purine rich element binding protein A, a single-stranded DNA-RNA binding protein implicated in the control of transcription and DNA replication; interacts with HIV Tat protein and JC virus T antigen to modulate host and viral gene expression                                            |
| Solute carrier family 9 isoform 3 regulatory factor 1 (sodium-hydrogen exchanger-regulatory factor), a cytoskeleton-linking protein that forms multiprotein complexes with members of the Ezrin-Radixin-Moesin family via two PDZ domains                                                                                                                                                                                                                       |
| PIR2:T13151 adapter protein CMS - human [MASS=71451]/CMS: an adapter molecule involved in cytoskeletal rearrangements/CD2-associated protein, an adaptor that may play a role in kidney function and mediate cytoskeletal rearrangement; mouse Cd2ap is associated with congenital nephrotic syndrome and possibly Nail-Patella syndrome nephropathy and polycystic kidney disease                                                                              |
| GP:AB008515_1 Homo sapiens mRNA for RanBPM, complete cds. [MASS=55082]/Ran-binding protein 9, plays a role in microtubule nucleation, interacts specifically with RAN guanosine triphosphatase and mediates Ran-dependent centrosomal function                                                                                                                                                                                                                  |
| SW:CAPB_HUMAN P47756 homo sapiens (human). f-actin capping protein beta subunit (capz). 5/2000 [MASS=30629]/Capping protein Z-line beta 1, a subunit of an actin-binding protein that caps the barbed end of actin filaments and regulates actin polymerization dynamics, may have a role in cell motility                                                                                                                                                      |
| SW:DAG1_HUMAN Q14118 homo sapiens (human). dystroglycan precursor (dystrophin-associated glycoprotein 1) [contains: alpha-dystroglycan (alpha-dg); beta-dystroglycan (beta-dg)]. 5/2000 [MASS=97581]/Dystroglycan 1, component of a dystrophin-associated glycoprotein complex that binds laminin, may link the extracellular matrix and cytoskeleton, may play a role in synaptic function; deficiency is involved in the pathogenesis of muscular dystrophies |
| GP:U45976_1 Human clathrin assembly protein lymphoid myeloid leukemia (CALM) mRNA, complete cds. [MASS=70695]/Phosphatidylinositol binding clathrin assembly protein, binds to clathrin heavy chain (CLTC) and plays a role in coated pit internalization; rearrangements in the corresponding gene are associated with acute lymphoblastic and acute myeloid leukemias                                                                                         |

|                                                                                                                                                                                                                                                                                                                                                                                                                                                                           |
|---------------------------------------------------------------------------------------------------------------------------------------------------------------------------------------------------------------------------------------------------------------------------------------------------------------------------------------------------------------------------------------------------------------------------------------------------------------------------|
| <p>GP:AF044670_1 Homo sapiens 33 kDa Vamp-associated protein (VAP33) mRNA, complete cds; VAP-33<br/>[MASS=27318]/Vesicle-associated membrane protein (VAMP)-associated protein A, binds v-SNAREs, t-SNAREs, VAPB, and VAMP, predicted to be involved in vesicle transport and fusion</p>                                                                                                                                                                                  |
| <p>SW:CAZ2_HUMAN P47755 homo sapiens (human). f-actin capping protein alpha-2 subunit (capz). 12/1998<br/>[MASS=32949]/Capping protein Z-line (alpha 2), subunit of an actin-binding protein that may play a role in cell motility; corresponding gene is amplified in malignant gliomas and may be involved in tumorigenesis</p>                                                                                                                                         |
| <p>SW:HS9A_HUMAN P07900 homo sapiens (human). heat shock protein hsp 90-alpha (hsp 86). 5/2000 [MASS=84543]/Heat shock 90kD protein 1 alpha, a molecular chaperone that mediates protein folding, activates MAPK1, MAPK3, and caspase, may regulate a G protein-coupled receptor signaling pathway, may promote the proliferation of breast cancer cells</p>                                                                                                              |
| <p>SW:CYP4_HUMAN Q08752 homo sapiens (human). 40 kda peptidyl-prolyl cis-trans isomerase (ec 5.2.1.8) (ppiase) (rotamase) (cyclophilin-40) (cyp-40) (cyclophilin-related protein). 5/2000 [MASS=40764]/Petidylprolyl isomerase D, cyclosporin A and HSPCA -binding peptidylprolyl isomerase, part of steroid receptor and mitochondrial permeability transition pore complexes, may regulate protein trafficking, steroid receptor signal transduction, and apoptosis</p> |
| <p>PIR2:I59405 RNA polymerase II transcription factor SIII p18 subunit - human [MASS=13133]/Transcription elongation factor B (SIII) polypeptide 2, a subunit of the elongin complex that facilitates RNA polymerase II elongation, component of a ubiquitin ligase complex that stabilizes and enhances the tumor suppressor action of the VHL protein</p>                                                                                                               |
| <p>PIR2:T09073 splicing factor Sip1 - human [MASS=128875]/Splicing factor arginine serine rich 2 interacting protein, a SR domain family protein that interacts with the RNA polymerase II C-terminal domain and several splicing factors, is essential in mRNA splicing and possibly spliceosome A-complex formation</p>                                                                                                                                                 |
| <p>SW:Y017_HUMAN Q15393 homo sapiens (human). hypothetical protein kiaa0017. 5/2000 [MASS=44606]/ Homo sapiens mRNA for SAP 130 spliceosomal protein/Splicing factor 3b subunit 3, a component of the U2 snRNP-associated protein complex SF3b that plays a role in spliceosome assembly, interacts with STAGA and TFTC complexes implicated in DNA repair, chromatin modification, and transcription</p>                                                                 |
| <p>GP:AB006537_1 Homo sapiens mRNA for interleukin 1 receptor accessory protein, complete cds. [MASS=65418]/Interleukin-1 receptor accessory protein, a subunit of the interleukin-1 receptor complex, recruits IRAK to the receptor complex in an early stage of interleukin-1 signaling</p>                                                                                                                                                                             |
| <p>SW:LMG1_HUMAN P11047 homo sapiens (human). laminin gamma-1 chain precursor (laminin b2 chain). 7/1998<br/>[MASS=177607]/Laminin C1, an extracellular matrix glycoprotein that may be involved in cell-matrix adhesion and the regulation of cell shape</p>                                                                                                                                                                                                             |
|                                                                                                                                                                                                                                                                                                                                                                                                                                                                           |
| <p>SW:KLK2_HUMAN P20151 homo sapiens (human). glandular kallikrein 2 precursor (ec 3.4.21.35) (tissue kallikrein) (prostate) (hgk-1). 10/1996 [MASS=28671]/Kallikrein 2, arginine selective serine protease, involved in activation of PSA (KLK3), may activate urokinase type plasminogen activator (PLAU), used as a marker with PSA (KLK3) to help discriminate between prostate cancer and benign prostate hyperplasia</p>                                            |
| <p>SW:PRCE_HUMAN P28074 homo sapiens (human). proteasome epsilon chain precursor (ec 3.4.99.46) (macropain epsilon chain) (multicatalytic endopeptidase complex epsilon chain) (proteasome subunit x) (protea [MASS=22897]/Proteasome (prosome, macropain) subunit beta type 5, which is a multicatalytic proteinase complex involved in cellular protein degradation and antigen processing; may be competitively inhibited by the HIV1 protease inhibitor Ritonavir</p> |
| <p>PIR2:JC6523 26S proteasome regulatory complex chain p55 - human [MASS=52904]/Proteasome (prosome, macropain) 26S subunit (non-ATPase, 12), a regulatory subunit of the 26S proteasome</p>                                                                                                                                                                                                                                                                              |
| <p>GP:AB029020_1 Homo sapiens mRNA for KIAA1097 protein, partial cds. [MASS=110942]/ Similar to ubiquitin specific protease 20/Member of the ubiquitin carboxyl-terminal hydrolase family 2, contains a ubiquitin carboxyl-terminal hydrolases family 2 domain and a Zn-finger in ubiquitin-hydrolases and other proteins domain, has a region of low similarity to a region of human USP4</p>                                                                            |
| <p>SW:UBCC_HUMAN Q16781 homo sapiens (human). ubiquitin-conjugating enzyme e2-17 kda (ec 6.3.2.19) (ubiquitin- protein ligase) (ubiquitin carrier protein) (ubc13). 7/1999 [MASS=17138]/Ubiquitin-conjugating enzyme E2N (yeast UBC13 homolog), forms heterodimers with ubiquitin-conjugating enzyme E2 variants 1 or 2 (UBE2V1, UBE2V2), and catalyzes formation of unique lysine 63-linked polyubiquitin chains involved in I kappaB kinase activation</p>              |
| <p>SW:SNAA_HUMAN P54920 homo sapiens (human). alpha-soluble nsf attachment protein (snap-alpha). 5/2000 [MASS=33247]/N-ethylmaleimide-sensitive factor (NSF) attachment protein alpha, binds SNARE complexes and recruits NSF to form the 20s fusion particle, stimulates NSF ATPase activity promoting SNARE complex disassembly and exocytosis, functions in intra-Golgi transport</p>                                                                                  |
| <p>SW:PRCZ_HUMAN P28066 homo sapiens (human). proteasome zeta chain (ec 3.4.99.46) (macropain zeta chain) (multicatalytic endopeptidase complex zeta chain). 7/1999 [MASS=26469]/Proteasome subunit alpha type 5 (ZETA), component of the 20S catalytic core proteasome that is involved in cellular protein degradation, has ribonuclease activity</p>                                                                                                                   |
| <p>GP:U86782_1 Human 26S proteasome-associated pad1 homolog (POH1) mRNA, complete cds; human homolog of fission yeast pad1. [MASS=34577]/26S proteasome-associated pad1 homolog, a subunit of the 26S proteasome, confers multidrug resistance and resistance to ultraviolet light when overexpressed</p>                                                                                                                                                                 |

|                                                                                                                                                                                                                                                                                                                                                                                                                                                                   |
|-------------------------------------------------------------------------------------------------------------------------------------------------------------------------------------------------------------------------------------------------------------------------------------------------------------------------------------------------------------------------------------------------------------------------------------------------------------------|
| <p>SW:PRS8_HUMAN P47210 homo sapiens (human). 26s protease regulatory subunit 8 (proteasome subunit p45) (thyroid hormone receptor interacting protein 1) (trip1). 11/1997 [MASS=45653]/ATPase subunit 5 of the 26S proteasome, which is a multicatalytic proteinase complex involved in cellular protein degradation; may also function as a transcriptional modulator</p>                                                                                       |
| <p>GP:AB012191_1 Homo sapiens mRNA for Nedd8-conjugating enzyme hUbc12, complete cds. [MASS=20900]/Neurally expressed developmentally down-regulated 8, an ubiquitin-like protein that conjugates to CUL proteins to activate ubiquitin ligase complex dependent ubiquitination, possibly involved in cell cycle regulation</p>                                                                                                                                   |
| <p>SW:NEP_HUMAN P08473 homo sapiens (human). nepriylsin (ec 3.4.24.11) (neutral endopeptidase) (nep) (enkephalinase) (common acute lymphocytic leukemia antigen) (calla) (neutral endopeptidase 24.11) (cd10) [MASS=85383]/Enkephalinase; membrane zinc metalloendopeptidase, may inactivate peptide hormones</p>                                                                                                                                                 |
| <p>SW:PRS7_HUMAN P35998 homo sapiens (human). 26s protease regulatory subunit 7 (mss1 protein). 11/1997 [MASS=48634]/26S protease regulatory subunit 7, ATPase subunit of the 26S proteasome, interacts with Tat protein, may be involved in cell cycle control and has a role in the activation of human immunodeficiency virus-1 (HIV-1) gene transcription</p>                                                                                                 |
| <p>SW:PRSX_HUMAN Q92524 homo sapiens (human). 26s protease regulatory subunit s10b (proteasome subunit p42). 12/1998 [MASS=44161]/Proteasome (prosome, macropain) 26S subunit ATPase 6, part of both PA700 and PA700-dependent complexes, which regulate intracellular protease activity, may be involved in spermatogenesis</p>                                                                                                                                  |
| <p>SW:PRCD_HUMAN P28072 homo sapiens (human). proteasome delta chain precursor (ec 3.4.99.46) (macropain delta chain) (multicatalytic endopeptidase complex delta chain) (proteasome subunit y). 5/2000 [MASS=25316]/Proteasome (prosome, macropain) subunit beta 6 (proteasome delta), putative endopeptidase down-regulated by interferon gamma, may be involved in proteolysis and peptidolysis</p>                                                            |
| <p>SW:PSD2_HUMAN Q13200 homo sapiens (human). 26s proteasome regulatory subunit s2 (p97) (tumor necrosis factor type 1 receptor associated protein 2) (55.11 protein). 7/1999 [MASS=100200]/Proteasome 26S non-ATPase subunit 2, a subunit of the 26S proteasome, likely involved in ubiquitin-dependent proteolysis, binds the type 1 tumor necrosis factor receptor (TNFRSF1A) and may function in TNFR signaling</p>                                           |
| <p>SW:PRSC_HUMAN P51665 homo sapiens (human). 26s proteasome regulatory subunit s12 (proteasome subunit p40) (mov34 protein). 11/1997 [MASS=37060]/Proteasome (prosome, macropain) 26S subunit non-ATPase 7, a putative regulatory subunit of the 26S proteasome; mutation of the mouse Psdm7 gene results in recessive embryonic lethality</p>                                                                                                                   |
| <p>SW:PSD1_HUMAN Q99460 homo sapiens (human). 26s proteasome regulatory subunit s1 (p112). 12/1998 [MASS=105866]/Proteasome (prosome, macropain) 26S subunit (non-ATPase,1), a regulatory subunit of the 26S proteasome</p>                                                                                                                                                                                                                                       |
| <p>SW:Y253_HUMAN Q92542 homo sapiens (human). hypothetical protein k1aa0253 (fragment). 7/1998 [MASS=78280]/Nicastrin, a transmembrane glycoprotein that may be required for the assembly and transport of presenilin complex that processes amyloid precursor protein (APP), may play a role in notch signaling and abnormal APP processing in Alzheimer disease</p>                                                                                             |
| <p>SW:PRC5_HUMAN P20618 homo sapiens (human). proteasome component c5 (ec 3.4.99.46) (macropain subunit c5) (proteasome gamma chain) (multicatalytic endopeptidase complex subunit c5). 11/1997 [MASS=26489]/Proteasome subunit alpha type 5 (ZETA), component of the 20S catalytic core proteasome that is involved in cellular protein degradation, has ribonuclease activity</p>                                                                               |
| <p>PIR2:JC6524 26S proteasome regulatory complex chain p44.5 - human [MASS=47464]/Subunit 9 of the 26S proteasome (proteasome 26S subunit non-ATPase 11), a non-ATPase subunit of the 19S regulatory unit of the 26S proteasome complex, confers ATP dependency to the 26S proteasome, which mediates ubiquitin-dependent protein degradation</p>                                                                                                                 |
| <p>SW:PRC2_HUMAN P25786 homo sapiens (human). proteasome component c2 (ec 3.4.99.46) (macropain subunit c2) (proteasome nu chain) (multicatalytic endopeptidase complex subunit c2) (30 kda prosomal protein) [MASS=29556]/Alpha type 1 proteasome (prosome, macropain) subunit , a component of a multicatalytic proteinase complex that is involved in cellular protein degradation</p>                                                                         |
| <p>GP:D38048_1 Human mRNA for proteasome subunit z, complete cds. [MASS=29965]/Proteasome (prosome, macropain) subunit beta 7, a subunit of the 26S proteasome, replaced by PSMB10 upon interferon gamma (IFNG) stimulation</p>                                                                                                                                                                                                                                   |
| <p>SW:PRC8_HUMAN P25788 homo sapiens (human). proteasome component c8 (ec 3.4.99.46) (macropain subunit c8) (multicatalytic endopeptidase complex subunit c8). 12/1998 [MASS=28302]/Proteasome subunit alpha type 3, the C8 subunit of the 20S core proteasome, which is a multicatalytic proteinase complex involved in cellular protein degradation; expression is increased in skeletal muscle of slim AIDS patients</p>                                       |
| <p>GP:AB009398_1 Homo sapiens mRNA for 26S proteasome subunit p40.5, complete cds. [MASS=42945]/Proteasome (prosome, macropain) 26S subunit (non-ATPase, 13), a subunit of the PA700 regulatory complex of the 26S proteasome</p>                                                                                                                                                                                                                                 |
| <p>PIR2:T46412 ubiquitin--protein ligase (EC 6.3.2.19) NEDD4 - human (fragment) [MASS=95283]/Neural cell precursor expressed developmentally downregulated 4, ubiquitin-protein ligase with multiple WW domains, binds to and reduces the activity of epithelial sodium channels, may play a role in neural differentiation, regulated by kinase SGK</p>                                                                                                          |
| <p>SW:UB5A_HUMAN P51668 homo sapiens (human). ubiquitin-conjugating enzyme e2-17 kda 1 (ec 6.3.2.19) (ubiquitin- protein ligase) (ubiquitin carrier protein) (e2(17)kb 1). 12/1998 [MASS=16602]/Ubiquitin-conjugating enzyme E2D1, member of the ubiquitin-conjugating enzyme subfamily that catalyzes the ubiquitination of cellular proteins and marks them for degradation, acts with the ubiquitin protein ligase E6AP (UBE3A) to ubiquitinate p53 (TP53)</p> |

|                                                                                                                                                                                                                                                                                                                                                                                                                                                                                           |
|-------------------------------------------------------------------------------------------------------------------------------------------------------------------------------------------------------------------------------------------------------------------------------------------------------------------------------------------------------------------------------------------------------------------------------------------------------------------------------------------|
| <p>SW:PRCL_HUMAN P34062 homo sapiens (human), and rattus norvegicus (rat). proteasome iota chain (ec 3.4.99.46) (macropain iota chain) (multicatalytic endopeptidase complex iota chain) (27 kda prosomal pro [MASS=27399]/Proteasome subunit alpha type 6, a member of the alpha type prosomal gene family, part of a multicatalytic protease complex involved in cellular protein degradation; also binds RNA specifically</p>                                                          |
| <p>SW:PRS4_HUMAN Q03527 homo sapiens (human). 26s protease regulatory subunit 4 (p26s4). 12/1998 [MASS=49185]/Proteasome 26S subunit ATPase 1, an ATPase subunit of the 26S proteasome multicatalytic protease complex, may play a role in ubiquitin-dependent protein degradation, interacts with the papilloma virus oncoprotein E7</p>                                                                                                                                                 |
| <p>SW:TPP2_HUMAN P29144 homo sapiens (human). tripeptidyl-peptidase ii (ec 3.4.14.10) (tpp ii) (tripeptidyl aminopeptidase). 11/1997 [MASS=138449]/Tripeptidyl peptidase II, a serine exopeptidase that may provide an alternative, non-proteasomal mechanism for protein turnover, participates in the apoptotic pathway activated by Shigella, upregulated in Burkitt's lymphoma cells overexpressing MYC</p>                                                                           |
| <p>SW:DIAC_HUMAN Q01459 homo sapiens (human). di-n-acetylchitobiase precursor (ec 3.2.1.-). 7/1999 [MASS=43760]/Chitobiase (di-N-acetylchitobiase), a lysosomal glycosidase involved in the degradation of asparagine-linked glycoproteins</p>                                                                                                                                                                                                                                            |
| <p>GP:U41806_1 Human EB13-associated protein p60 mRNA, complete cds; EB13-associated protein. [MASS=47602]/Sequestosome 1 (ubiquitin-binding protein p62), a ubiquitin-binding protein with a zinc finger-like motif, a G protein-binding region and a PEST motif, interacts with several signal transduction pathways, may be involved in endosome to lysosome transport</p>                                                                                                             |
| <p>GP:AB002310_1 Human mRNA for KIAA0312 gene, partial cds. [MASS=209315]/Protein containing a HECT domain, which may confer ubiquitin-protein ligase activity, has high similarity to a region of S. cerevisiae Tom1p, which is a protein required for the G2/M transition</p>                                                                                                                                                                                                           |
| <p>SW:PSD4_HUMAN P55036 homo sapiens (human). 26s proteasome regulatory subunit s5a (multiubiquitin chain binding protein) (antiseecretory factor-1) (af) (asf). 12/1998 [MASS=40737]/Proteasome 26S subunit non ATPase 4, an antiseecretory factor that is a subunit of the 26S proteasome and may bind to multiubiquitinated proteins; inhibits intestinal fluid secretion induced by cholera toxin</p>                                                                                 |
| <p>SWN:PSA7_HUMAN O14818 homo sapiens (human). proteasome subunit alpha type 7 (ec 3.4.99.46) (proteasome subunit rc6-1) (proteasome subunit xapc7). 8/2001 [MASS=27887]/Proteasome (prosome, macropain) subunit (alpha type) 7, a subunit of the 20S core proteasome, a target of hepatitis B virus X protein; may be involved in pathogenesis of pancreatic cancer</p>                                                                                                                  |
| <p>PIR2:T14762 hypothetical protein DKFZp434A014.1 - human (fragment) [MASS=92341]/Member of the angiotensin-converting enzyme family of dipeptidyl carboxydiptidases</p>                                                                                                                                                                                                                                                                                                                 |
| <p>SW:UBPA_HUMAN Q14694 homo sapiens (human). ubiquitin carboxyl-terminal hydrolase 10 (ec 3.1.2.15) (ubiquitin thiolesterase 10) (ubiquitin-specific processing protease 10) (deubiquitinating enzyme 10) (k [MASS=87134]/Ubiquitin specific protease 10, a member of the ubiquitin-specific cysteine (thiol) protease family, cleaves ubiquitin from ubiquitin-conjugated protein substrates, activity is inhibited upon association with Ras-GAP SH3 domain binding protein</p>        |
| <p>SWN:UBPF_HUMAN Q9y4e8 homo sapiens (human). ubiquitin carboxyl-terminal hydrolase 15 (ec 3.1.2.15) (ubiquitin thiolesterase 15) (ubiquitin-specific processing protease 15) (deubiquitinating enzyme 15) (f [MASS=108965]/Ubiquitin-specific protease 15, a member of the ubiquitin-specific cysteine (thiol) protease family, cleaves ubiquitin from ubiquitin-conjugated protein substrates, may play a role in growth regulation</p>                                                |
| <p>GP:AF039689_1 Homo sapiens antigen NY-CO-7 (NY-CO-7) mRNA, complete cds; TPR domain protein. [MASS=34791]/STUB1</p>                                                                                                                                                                                                                                                                                                                                                                    |
| <p>SW:CATD_HUMAN P07339 homo sapiens (human). cathepsin d precursor (ec 3.4.23.5). 2/1996 [MASS=44552]/Cathepsin D, a lysosomal aspartyl protease that is induced by estrogen and degrades intracellular and endocytosed proteins, a positive mediator of apoptosis; abnormal expression observed in tumor cell proliferation and metastasis</p>                                                                                                                                          |
| <p>GP:D87684_1 Homo sapiens mRNA for KIAA0242 protein, partial cds; Start codon is not identified. ha03111 cDNA clone for KIAA0242 has a 94-bp deletion at the region from 573 to 666 of the sequence of KIAA0242; similar to a C.elegans ZK353.8 protein (S44655). [MASS=59094]/Protein containing a UBX domain, which are found in ubiquitin regulatory proteins, has low similarity to uncharacterized C. elegans ZK353.8</p>                                                          |
| <p>SW:UBCI_HUMAN P50550 homo sapiens (human), mus musculus (mouse), and xenopus laevis (african clawed frog). ubiquitin-conjugating enzyme e2-18 kda (ec 6.3.2.19) (ubiquitin-protein ligase) (ubiquitin carr [MASS=18007]/Ubiquitin-conjugating enzyme E21, member of the ubiquitin-conjugating enzyme family that catalyzes the ubiquitination of cellular proteins and marks them for degradation, may play roles in cell cycle progression and repair of TOP1-mediated DNA damage</p> |
| <p>PIR2:I59405 RNA polymerase II transcription factor SIII p18 subunit - human [MASS=13133]/Transcription elongation factor B (SIII) polypeptide 2, a subunit of the elongin complex that facilitates RNA polymerase II elongation, component of a ubiquitin ligase complex that stabilizes and enhances the tumor suppressor action of the VHL protein</p>                                                                                                                               |
| <p>SW:LONM_HUMAN P36776 homo sapiens (human). mitochondrial lon protease homolog precursor (ec 3.4.21.-). 11/1995 [MASS=106467]/Protease serine 15, an ATP-dependent mitochondrial peptidase that binds single-stranded DNA and may play a role in the regulation of mitochondrial DNA replication and gene expression</p>                                                                                                                                                                |
| <p>SW:PRTP_HUMAN P10619 homo sapiens (human). lysosomal protective protein precursor (ec 3.4.16.5) (cathepsin a) (carboxypeptidase c). 12/1998 [MASS=54496]/Protective protein for beta-galactosidase (cathepsin A), has serine carboxypeptidase activity, forms a complex with beta galactosidase (GLB1) and neuraminidase (NEU1), facilitates NEU1 transport and activation; genetic mutation leads to galactosialidosis</p>                                                            |

|                                                                                                                                                                                                                                                                                                                                                                                                                                                                                  |
|----------------------------------------------------------------------------------------------------------------------------------------------------------------------------------------------------------------------------------------------------------------------------------------------------------------------------------------------------------------------------------------------------------------------------------------------------------------------------------|
| SW:PPT_HUMAN P50897 homo sapiens (human). palmitoyl-protein thioesterase precursor (ec 3.1.2.22) (palmitoyl- protein hydrolase). 5/2000 [MASS=34193]/Palmitoyl-protein thioesterase (ceroid-lipofuscinosis, neuronal 1, infantile), catalyzes the hydrolysis of palmitate from S-acetylated cysteine residues, may be involved in apoptosis; gene mutation is detected in infantile neuronal ceroid lipofuscinosis                                                               |
| SW:CATB_HUMAN P07858 homo sapiens (human). cathepsin b precursor (ec 3.4.22.1) (cathepsin b1) (app secretase). 7/1998 [MASS=37808]/Cathepsin B, a cysteine (thiol) protease that degrades cartilage matrix proteins and other proteins, also cleaves APP; commonly overexpressed in tumors, and may be proapoptotic, but also facilitates tumor invasion                                                                                                                         |
| SW:CUL2_HUMAN Q13617 homo sapiens (human). cullin homolog 2 (cul-2). 12/1998 [MASS=86956]/Cullin 2, has E3 ubiquitin ligase activity when present in a complex containing von Hippel Lindau tumor suppressor (VHL)- elogin B (TCEB2)- elogin C (TCEB1); modification by ubiquitin-like protein NEDD8 may be important for VHL tumor suppressor function                                                                                                                          |
| SW:CATH_HUMAN P09668 homo sapiens (human). cathepsin h precursor (ec 3.4.22.16). 7/1999 [MASS=37404]/Cathepsin H, a cysteine (thiol) protease, member of a family of lysosomal cysteine proteases involved in a variety of proteolytic processes, may serve as a marker of tumor progression in central nervous system and pancreatic neoplasms                                                                                                                                  |
| SW:RL40_HUMAN P14793 homo sapiens (human), rattus norvegicus (rat), and gallus gallus (chicken). 60s ribosomal protein l40 (cep52). 11/1997 [MASS=6181]/Ubiquitin A-52 residue ribosomal protein fusion product 1, protein consisting of ubiquitin at the N-terminus and ribosomal protein L40 at the C-terminus; the corresponding gene is upregulated in colon cancer but not in gastric cancer                                                                                |
| SW:TPP1_HUMAN O14773 homo sapiens (human). tripeptidyl-peptidase i precursor (ec 3.4.14.9) (tpp-i) (tripeptidyl aminopeptidase) (lysosomal pepstatin insensitive protease) (lpic). 5/2000 [MASS=61229]/Tripeptidyl peptidase I (ceroid-lipofuscinosis neuronal 2), a lysosomal serine-type peptidase required for degradation of ATP synthase subunit c (ATP5G1 and ATP5G2); mutations in the corresponding gene cause late infantile neuronal ceroid lipofuscinosis             |
| (matritptase) (membrane- type serine protease 1) (mt-sp1)/Matriptase, a type 2 integral membrane serine protease, degrades extracellular matrix, activates hepatocyte growth factor (HGF) and urokinase plasminogen activator (PLAU), and may play a role in progression and metastasis of epithelial-derived cancers                                                                                                                                                            |
| UBIQUITIN CARBOXYL-TERMINAL HYDROLASE 24 /Member of the ubiquitin carboxyl-terminal hydrolase family 2 that contains a ubiquitin carboxyl-terminal hydrolases family 2 domain, has low similarity to a region of ubiquitin specific protease 9 X chromosome (human USP9X)                                                                                                                                                                                                        |
|                                                                                                                                                                                                                                                                                                                                                                                                                                                                                  |
| SW:TRAL_HUMAN Q12931 homo sapiens (human). tumor necrosis factor type 1 receptor associated protein (trap-1) (fragment). 5/2000 [MASS=75342]/Heat shock protein 75, member of the HSP90 family of molecular chaperones, binds and refolds denatured retinoblastoma (RB1) protein during M phase and after heat shock, binds the intracellular domain of tumor necrosis factor receptor type 1                                                                                    |
| SW:FKB5_HUMAN Q13451 homo sapiens 51 kda fk506-binding protein (fkbp51) (peptidyl-prolyl cis-trans isomerase) (ec 5.2.1.8) (ppiase) (rotamase) (54 kda progesterone receptor-associated immunophilin) (fkb [MASS=51212]/FK506-binding protein 5, a peptidylprolyl cis-trans isomerase and member of the immunophilin family of FK506-binding proteins, forms a progesterone receptor complex with Hsp90 and p23, serves as a chaperone and mediates inhibition of calcineurin    |
| SW:HS7C_HUMAN P11142 homo sapiens (human). heat shock cognate 71 kda protein. 12/1998 [MASS=70898]/Heat shock 70kD protein 8, a constitutively expressed member of the heat shock HSP70 family of molecular chaperones; expression is elevated in the hearts of patients with hypertrophic cardiomyopathy                                                                                                                                                                        |
| PIR2:JC1365 FK506/rapamycin-binding protein FKBP13 precursor - human [MASS=15649]/FK506-binding protein 2 (FKBP13), an ER membrane-associated member of a family of peptidyl-prolyl cis-trans isomerases that bind the macrolide immunosuppressant drugs FK506 and rapamycin, does not play a role in the immunosuppressant action of FK506                                                                                                                                      |
| SW:TCPE_HUMAN P48643 homo sapiens (human). t-complex protein 1, epsilon subunit (tcp-1-epsilon) (cct-epsilon) (kiaa0098). 11/1997 [MASS=59671]/Chaperonin containing T-complex 1 subunit 5 (epsilon), part of a cytosolic hexadecamer structure involved in ATP-dependent folding of actin, tubulin and other proteins, binds Epstein-Barr Virus-encoded EBNA3 and may mediate its initial folding                                                                               |
| GP:AF227905_1 Homo sapiens UDP-glucose:glycoprotein glucosyltransferase 1 precursor, mRNA, complete cds; HUGT1. [MASS=177190]/UDP-glucose:glycoprotein glucosyltransferase; transfers glucose from UDP-glucose to improperly folded glycoproteins                                                                                                                                                                                                                                |
| SW:TCPZ_HUMAN P40227 homo sapiens (human). t-complex protein 1, zeta subunit (tcp-1-zeta) (cct-zeta) (cct-zeta-1) (tcp20) (htr3). 7/1999 [MASS=58024]/Chaperonin containing T-complex 1 subunit 6A (zeta), part of a cytosolic hexadecamer structure involved in ATP-dependent folding of actin, tubulin and other proteins, decreased activity may result in misfolded tubulin aggregates in Alzheimers disease                                                                 |
| SW:FKB1_HUMAN P20071 homo sapiens (human), and oryctolagus cuniculus (rabbit). fk506-binding protein (fkbp-12) (peptidyl-prolyl cis-trans isomerase) (ec 5.2.1.8) (ppiase) (rotamase) (immunophilin fkbp12 [MASS=11820]/FK506-binding protein 1A, peptidyl prolyl cis-trans isomerase, modulates the Ca2+-release activity of ryanodine receptors, complex with FK506 inhibits calcineurin-dependent lymphokine gene transcription and mediates FK506 immunosuppressive activity |



|                                                                                                                                                                                                                                                                                                                                                                                                                                                                                        |
|----------------------------------------------------------------------------------------------------------------------------------------------------------------------------------------------------------------------------------------------------------------------------------------------------------------------------------------------------------------------------------------------------------------------------------------------------------------------------------------|
| SW:CALX_HUMAN P27824 homo sapiens (human). calnexin precursor (major histocompatibility complex class I antigen-binding protein p88) (p90) (ip90). 11/1995 [MASS=67568]/Calnexin, a calcium and lectin binding protein that functions as a chaperone in the endoplasmic reticulum, involved in protein folding and secretion, mediates retention of misfolded proteins in the endoplasmic reticulum                                                                                    |
| SW:ER53_HUMAN P49257 homo sapiens (human). ergic-53 protein precursor (er-golgi intermediate compartment 53 kda protein) (gp58) (mr60) (lectin, mannose-binding 1). 7/1998 [MASS=57563]/Mannose-binding lectin 1, involved in the traffic of glycoproteins between endoplasmic reticulum and the Golgi apparatus; mutations of the corresponding gene is associated with combined factor V and VIII coagulation deficiency                                                             |
| SW:DNJ2_HUMAN P31689 homo sapiens (human). dnaj protein homolog 2 (hsj-2). 7/1999 [MASS=44868]/DnaJ homolog subfamily A member 1, heat shock protein, expressed in many tissues                                                                                                                                                                                                                                                                                                        |
| SW:H1P_HUMAN P50502 homo sapiens (human). hsc70-interacting protein (progesterone receptor-associated p48 protein) (putative tumor suppressor st13). 5/2000 [MASS=41332]/Suppression of tumorigenicity 13 (Hsp70-interacting protein), acts as an Hsc70 cochaperone, contains tetratricopeptide repeats, participates in protein complex assembly, heat shock response, and lysosomal transport; downregulated in colorectal carcinoma                                                 |
| SW:TCPB_HUMAN P78371 homo sapiens (human). t-complex protein 1, beta subunit (tcp-1-beta) (cct-beta). 7/1999 [MASS=57488]/Chaperonin containing T-complex polypeptide-1 (TCP1) subunit 2, the beta subunit of the chaperonin containing complex (CCT), plays a role in the folding of cytosolic proteins, may be required for the proper folding of cyclin E                                                                                                                           |
| GP:AB015798_1 Homo sapiens HSJ2 mRNA for DnaJ homolog, complete cds; DnaJ homologue HSJ2a. [MASS=36087]/DnaJ homolog subfamily A member 1, heat shock protein, expressed in many tissues                                                                                                                                                                                                                                                                                               |
| SW:TCPG_HUMAN P49368 homo sapiens (human). t-complex protein 1, gamma subunit (tcp-1-gamma) (cct-gamma). 12/1998 [MASS=60331]/Cytosolic chaperonin containing TCP-1 (CCT) gamma subunit, may act as a chaperonin and assist in the proper folding of tubulin, actin, and centractin                                                                                                                                                                                                    |
| SW:CYPB_HUMAN P23284 homo sapiens (human). peptidyl-prolyl cis-trans isomerase b precursor (ec 5.2.1.8) (ppiase) (rotamase) (cyclophilin b) (s-cyclophilin) (scylp) (cyp-s1). 7/1999 [MASS=22742]/Cyclophilin B, a peptidyl prolyl cis-trans isomerase that binds to and is inhibited by the immunosuppressive drug cyclosporin A, plays a role in protein folding, binds to the human immunodeficiency virus type I Gag polyprotein                                                   |
| SW:TCPH_HUMAN Q99832 homo sapiens (human). t-complex protein 1, eta subunit (tcp-1-eta) (cct-eta) (hiv-1 nef interacting protein). 7/1998 [MASS=59367]/Chaperonin containing T-complex polypeptide-1 (TCP1) subunit 7, the eta subunit of the chaperonin containing complex (CCT), plays a role in protein folding and in the response to chemical stress, may be required for proper folding of cyclin E                                                                              |
| SW:TCPA_HUMAN P17987 homo sapiens (human). t-complex protein 1, alpha subunit (tcp-1-alpha) (cct-alpha). 5/2000 [MASS=60344]/T-complex 1, subunit of the cytosolic chaperonin containing TCP-1 (CCT), may assist in the proper folding of tubulin, and may be involved in the response to chemical stressors                                                                                                                                                                           |
| SW:TCPD_HUMAN P50991 homo sapiens (human). t-complex protein 1, delta subunit (tcp-1-delta) (cct-delta) (stimulator of tar ma binding). 5/2000 [MASS=57839]/Chaperonin containing T-complex 1 subunit 4 (delta), part of a cytosolic hexadecamer structure involved in ATP-dependent folding of actin, tubulin and other proteins                                                                                                                                                      |
| SW:CYPH_HUMAN P05092 homo sapiens (human), cercopithecus aethiops (green monkey) (grivet), macaca mulatta (rhesus macaque), and papio anubis peptidyl-prolyl cis-trans isomerase a (ec 5.2.1.8) (ppiase) ([MASS=17881]/Peptidylprolyl isomerase A (cyclophilin A), mediates immunosuppressant action of cyclosporin A by inhibiting calcineurin phosphatase activity, has nuclease activity, binds to transcription factors, incorporates into HIV-1 virions and regulates infectivity |
| PIR2:T00363 hypothetical protein KIAA0674 - human (fragment) [MASS=135179]/Member of the FKBP-type peptidyl-prolyl cis-trans isomerase family                                                                                                                                                                                                                                                                                                                                          |
| GP:AF039689_1 Homo sapiens antigen NY-CO-7 (NY-CO-7) mRNA, complete cds; TPR domain protein. [MASS=34791]/STUB1                                                                                                                                                                                                                                                                                                                                                                        |
| SW:CYP4_HUMAN Q08752 homo sapiens (human). 40 kda peptidyl-prolyl cis-trans isomerase (ec 5.2.1.8) (ppiase) (rotamase) (cyclophilin-40) (cyp-40) (cyclophilin-related protein). 5/2000 [MASS=40764]/Petidylprolyl isomerase D, cyclosporin A and HSPCA-binding peptidylprolyl isomerase, part of steroid receptor and mitochondrial permeability transition pore complexes, may regulate protein trafficking, steroid receptor signal transduction, and apoptosis                      |
| SW:HS9B_HUMAN P08238 homo sapiens (human). heat shock protein hsp 90-beta (hsp 84) (hsp 90). 5/2000 [MASS=83163]/Heat shock 90kD protein 1 beta, involved in regulation of both cytochrome c-dependent apoptosis and antiapoptosis via the Akt/PKB (AKT1) serine-threonine kinase, elevated expression is reported in patients with active systemic lupus erythematosus (SLE)                                                                                                          |
| SW:TCPQ_HUMAN P50990 homo sapiens (human). t-complex protein 1, theta subunit (tcp-1-theta) (cct-theta) (kiaa0002). 5/2000 [MASS=59635]/Protein with very strong similarity to murine Mm.17989, which is the theta subunit of the cytosolic chaperonin containing TCP-1 that assists in the proper folding of tubulin, actin and centractin                                                                                                                                            |
| GP:AF188611_1 Homo sapiens BIP protein (HSPA5) mRNA, partial cds; glucose-regulated protein (grp78). [MASS=70931]/Heat shock 70kD protein 5, chaperone and putative ATPase involved in protein folding in the endoplasmic reticulum, induced in the stress response; autoimmunity may be a factor in rheumatoid arthritis                                                                                                                                                              |

|                                                                                                                                                                                                                                                                                                                                                                                                                                                                               |
|-------------------------------------------------------------------------------------------------------------------------------------------------------------------------------------------------------------------------------------------------------------------------------------------------------------------------------------------------------------------------------------------------------------------------------------------------------------------------------|
| SW:P60_HUMAN P10809 homo sapiens (human). mitochondrial matrix protein p1 precursor (p60 lymphocyte protein) (60 kda chaperonin) (heat shock protein 60) (hsp-60) (protein cpn60) (groel protein) (hucha60 [MASS=61055]/Chaperonin 60, mitochondrial matrix protein induced by stress, component of the chaperonin complex that is implicated in mitochondrial protein folding and function, induced by inflammatory and immune responses, and implicated in coronary disease |
| SW:CYPM_HUMAN P30405 homo sapiens (human). peptidyl-prolyl cis-trans isomerase, mitochondrial precursor (ec 5.2.1.8) (ppiase) (rotamase) (cyclophilin). 11/1997 [MASS=22040]/Peptidylprolyl isomerase F (Cyclophilin F), a putative mitochondrial protein that binds the immunosuppressant drug cyclosporin A                                                                                                                                                                 |
| STE20/SPS1-RELATED PROLINE-ALANINE RICH PROTEIN KINASE (STE-20RELATED KINASE) (DCHT) /Ste-20-related protein kinase, member of the STE20/SPS1 family, a serine/threonine kinase, activates p38 kinase, may respond to stress activated signals                                                                                                                                                                                                                                |
| inhibitor of nuclear factor kappa b kinase beta subunit/Serine kinase that is a subunit of the I kappa B kinase (IKK) complex, phosphorylates I kappa B and activates NF-kappa B (RELA), activated by kinases NIK (MAP3K14) and MEKK1 (MAP3K1)                                                                                                                                                                                                                                |
| SW:PRCE_HUMAN P28074 homo sapiens (human). proteasome epsilon chain precursor (ec 3.4.99.46) (macropain epsilon chain) (multicatalytic endopeptidase complex epsilon chain) (proteasome subunit x) (protea [MASS=22897]/Proteasome (prosome, macropain) subunit beta type 5, which is a multicatalytic proteinase complex involved in cellular protein degradation and antigen processing; may be competitively inhibited by the HIV1 protease inhibitor Ritonavir            |
| SWN:AKT3_HUMAN Q9y243 homo sapiens (human). rac-gamma serine/threonine protein kinase (ec 2.7.1.-) (rac-pk-gamma) (protein kinase akt-3) (protein kinase b, gamma) (pkb gamma). 8/2001 [MASS=55775]/Protein kinase B gamma, a serine/threonine protein kinase that is activated by growth factors and 3-phosphoinositide; insulin-induced activity is upregulated in estrogen receptor negative breast cancer and androgen insensitive prostrate carcinoma                    |
| SW:AAK1_HUMAN Q13131 homo sapiens (human). 5'-amp-activated protein kinase, catalytic alpha-1 chain (ec 2.7.1.-) (ampk alpha-1 chain) (fragment). 7/1999 [MASS=19837]/AMP-activated protein kinase (alpha 1 catalytic subunit), a metabolic sensor of AMP levels, may have roles in signal transduction, may regulate the cystic fibrosis transmembrane conductance regulator (CFTR)                                                                                          |
| SW:UBCC_HUMAN Q16781 homo sapiens (human). ubiquitin-conjugating enzyme e2-17 kda (ec 6.3.2.19) (ubiquitin- protein ligase) (ubiquitin carrier protein) (ubc13). 7/1999 [MASS=17138]/Ubiquitin-conjugating enzyme E2N (yeast UBC13 homolog), forms heterodimers with ubiquitin-conjugating enzyme E2 variants 1 or 2 (UBE2V1, UBE2V2), and catalyzes formation of unique lysine 63-linked polyubiquitin chains involved in I kappa B kinase activation                        |
| GP:AF024636_1 Homo sapiens STE20-like kinase 3 (mst-3) mRNA, complete cds; protein serine/threonine kinase; similar to yeast STE20. [MASS=47941]/Serine-threonine kinase 24 (Ste20 yeast homolog), member of the SPS1 subgroup of the STE20-like protein family, a serine-threonine kinase that prefers manganese as a cofactor and uses either GTP or ATP as a phosphate donor                                                                                               |
| SW:EGFR_HUMAN P00533 homo sapiens (human). epidermal growth factor receptor precursor (ec 2.7.1.112). 12/1998 [MASS=134277]/Epidermal growth factor receptor, a receptor protein tyrosine kinase that binds epidermal growth factor (EGF) and transforming growth factor alpha (TGFA), involved in cell proliferation and differentiation, implicated in tumor invasion and metastasis                                                                                        |
| SW:TDXN_HUMAN Q13162 homo sapiens (human). thioredoxin peroxidase a0372 (thioredoxin-dependent peroxide reductase a0372) (antioxidant enzyme aoe372) (aoe37-2). 7/1999 [MASS=30540]/Peroxiredoxin 4, a thioredoxin dependent peroxidase that is regulated by interactions with other thiol peroxidases, may mediate hydrogen peroxide activation of NF-kappa B by modulating phosphorylation of cytoplasmic I kappa B-alpha (NFKBIA)                                          |
| SW:RIB1_HUMAN P04843 homo sapiens (human). dolichyl-diphosphooligosaccharide--protein glycosyltransferase 67 kda subunit precursor (ec 2.4.1.119) (ribophorin i). 7/1999 [MASS=68569]/Ribophorin I, a putative subunit of oligosaccharyltransferase involved in transcription initiation and possibly protein retention in the endoplasmic reticulum                                                                                                                          |
| GP:AB012191_1 Homo sapiens mRNA for Nedd8-conjugating enzyme hUbc12, complete cds. [MASS=20900]/Neurally expressed developmentally down-regulated 8, an ubiquitin-like protein that conjugates to CUL proteins to activate ubiquitin ligase complex dependent ubiquitination, possibly involved in cell cycle regulation                                                                                                                                                      |
| GP:AF227905_1 Homo sapiens UDP-glucose:glycoprotein glucosyltransferase 1 precursor, mRNA, complete cds; HUGT1. [MASS=177190]/UDP-glucose:glycoprotein glucosyltransferase; transfers glucose from UDP-glucose to improperly folded glycoproteins                                                                                                                                                                                                                             |
| SW:KCCB_HUMAN Q13554 homo sapiens (human). calcium/calmodulin-dependent protein kinase type ii beta chain (cam-kinase ii beta chain) (ec 2.7.1.123) (camk-ii, beta subunit) (fragment). 5/2000 [MASS=15141]/Calcium calmodulin-dependent protein kinase II beta subunit, putative roles in signal transduction and cell growth, increased expression may play a role in schizophrenia; variant forms of the corresponding gene are expressed in tumor cells                   |
| SW:PP1B_HUMAN P37140 homo sapiens (human), rattus norvegicus (rat), mus musculus (mouse), oryctolagus cuniculus (rabbit), and gallus gallus (chicken). serine/threonine protein phosphatase pp1-beta catal [MASS=37187]/Protein phosphatase 1 catalytic subunit beta isoform, subunit of a serine-threonine phosphatase that regulates many metabolic processes                                                                                                               |

|                                                                                                                                                                                                                                                                                                                                                                                                                                                                                      |
|--------------------------------------------------------------------------------------------------------------------------------------------------------------------------------------------------------------------------------------------------------------------------------------------------------------------------------------------------------------------------------------------------------------------------------------------------------------------------------------|
| SW:P2AA_HUMAN P05323 homo sapiens (human), oryctolagus cuniculus (rabbit), sus scrofa (pig), and bos taurus (bovine). serine/threonine protein phosphatase 2a, catalytic subunit, alpha isoform (ec 3.1.3. [MASS=35594]/Protein phosphatase 2 catalytic subunit alpha, a catalytic subunit of protein phosphatase 2A involved in regulating diverse cellular processes via protein phosphorylation                                                                                   |
| SW:SRC_HUMAN P12931 homo sapiens (human). proto-oncogene tyrosine-protein kinase src (ec 2.7.1.112) (p60-src) (c-src). 5/2000 [MASS=59704]/V-src avian sarcoma viral oncogene homolog (Schmidt-Ruppin A-2), tyrosine kinase involved in cell proliferation, cell adhesion, and cytoskeletal organization, implicated in the progression of colon cancer and certain breast tumors                                                                                                    |
| SW:KPC1_HUMAN P05771 homo sapiens (human). protein kinase c, beta-i type (ec 2.7.1.-) (pkc-beta-1). 7/1999 [MASS=76839]/Protein kinase C beta 1, conventional PKC expressed as beta I and beta II forms, beta II mediates G2/M phase transition, mitotic nuclear envelope breakdown, neutrophil NADPH oxidase assembly; rat Prkcb1 activity is enhanced in diabetes mellitus                                                                                                         |
| SW:GPS1_HUMAN Q13098 homo sapiens (human). g protein pathway suppressor 1 (gps1 protein) (mfh protein). 11/1997 [MASS=53372]/G protein pathway suppressor 1, suppressor of G protein and MAP kinase-mediated signaling pathways                                                                                                                                                                                                                                                      |
| GP:AB009398_1 Homo sapiens mRNA for 26S proteasome subunit p40.5, complete cds. [MASS=42945]/Proteasome (prosome, macropain) 26S subunit (non-ATPase, 13), a subunit of the PA700 regulatory complex of the 26S proteasome                                                                                                                                                                                                                                                           |
| PIR2:T46412 ubiquitin--protein ligase (EC 6.3.2.19) NEDD4 - human (fragment) [MASS=95283]/Neural cell precursor expressed developmentally downregulated 4, ubiquitin-protein ligase with multiple WW domains, binds to and reduces the activity of epithelial sodium channels, may play a role in neural differentiation, regulated by kinase SGK                                                                                                                                    |
| SW:UB5A_HUMAN P51668 homo sapiens (human). ubiquitin-conjugating enzyme e2-17 kda 1 (ec 6.3.2.19) (ubiquitin- protein ligase) (ubiquitin carrier protein) (e2(17)kb 1). 12/1998 [MASS=16602]/Ubiquitin-conjugating enzyme E2D1, member of the ubiquitin-conjugating enzyme subfamily that catalyzes the ubiquitination of cellular proteins and marks them for degradation, acts with the ubiquitin protein ligase E6AP (UBE3A) to ubiquitinate p53 (TP53)                           |
| SW:G25B_HUMAN P21181 homo sapiens (human), mus musculus (mouse), and bos taurus (bovine). g25k gtp-binding protein, brain isoform (gp) (cdc42 homolog). 12/1998 [MASS=21311]/Cell division cycle 42 (GTP binding protein 25kD), Rho GTPase involved in actin cytoskeleton organization, cell migration, cell cycle progression and apoptosis, downregulated in fibroblasts and macrophages from patients with Tangiers disease                                                       |
| SW:KIME_HUMAN Q03426 homo sapiens (human). mevalonate kinase (ec 2.7.1.36) (mk). 7/1999 [MASS=42451]/Mevalonate kinase (mevalonic aciduria), a peroxisomal enzyme involved in isoprenoid and cholesterol biosynthesis; mutations in the corresponding gene cause mevalonic aciduria, hyperimmunoglobulinemia D and periodic fever syndrome                                                                                                                                           |
| GP:AB025194_1 Homo sapiens mRNA for protein tyrosine phosphatase HD-PTP, complete cds. [MASS=178974]/Member of the protein-tyrosine phosphatase family, has a region of strong similarity to a region of protein tyrosine phosphatase TD14 (rat Ptpn23), which is a putative tyrosine phosphatase that associates with cytoplasmic vesicles when overexpressed                                                                                                                       |
| SW:MK01_HUMAN P28482 homo sapiens (human). mitogen-activated protein kinase 1 (ec 2.7.1.-) (extracellular signal-regulated kinase 2) (erk2) (mitogen-activated protein kinase 2) (map kinase 2) (mapk 2) [MASS=41390]/Mitogen-activated protein kinase 1, a serine-threonine kinase effector of the RAS-MAP kinase pathway, translocates to the nucleus to mediate transcription when activated, involved in the regulation of cell growth, differentiation, migration and apoptosis |
| SW:LYN_HUMAN P07948 homo sapiens (human). tyrosine-protein kinase lyn (ec 2.7.1.112). 5/2000 [MASS=58443]/ protein tyrosine kinase, a non-receptor tyrosine kinase important in cytokine receptor- and IgE receptor-mediated signal transduction, regulates cell adhesion and apoptosis, plays a role in platelet activation and inflammatory responses                                                                                                                              |
| SW:ARP2_HUMAN O15142 homo sapiens (human). actin-like protein 2. 7/1999 [MASS=44761]/Actin-related protein 2 homolog, a component of the Arp2/3 protein complex, which is involved in actin filament nucleation and polymerization, may form the nucleation interface with the pointed end of the actin filament                                                                                                                                                                     |
| PIR2:S52920 disintegrin (EC 3.4.24.-) - human (fragment) [MASS=54380]/A disintegrin and metalloproteinase domain 10, an ADAM family disintegrin domain-containing zinc metalloprotease, acts in ectodomain proteolysis of membrane proteins, cleaves cellular prion protein (PRNP), acts as an alpha secretase on APP                                                                                                                                                                |
| SW:KCCD_HUMAN Q13557 homo sapiens (human). calcium/calmodulin-dependent protein kinase type ii delta chain (cam-kinase ii delta chain) (ec 2.7.1.123) (camk-ii, delta subunit) (fragment). 5/2000 [MASS=12846]/Calcium/calmodulin-dependent protein kinase II delta, member of the multifunctional CAMKII family involved in Ca2+ regulated processes; alternative form delta 3 is specifically upregulated in the myocardium of patients with heart failure                         |
| SW:KRCB_HUMAN P31751 homo sapiens (human). rac-beta serine/threonine kinase (ec 2.7.1.-) (rac-pk-beta) (akt2 kinase). 11/1995 [MASS=55769]/v-akt murine thymoma viral oncogene homolog 2, protein kinase that is activated by mitogens and survival factors, may regulate cell proliferation and apoptosis, overexpression is associated with ovarian, breast and pancreatic cancers                                                                                                 |
| GP:AB002310_1 Human mRNA for KIAA0312 gene, partial cds. [MASS=209315]/Protein containing a HECT domain, which may confer ubiquitin-protein ligase activity, has high similarity to a region of S. cerevisiae Tom1p, which is a protein required for the G2/M transition                                                                                                                                                                                                             |

|                                                                                                                                                                                                                                                                                                                                                                                                                                                                                           |
|-------------------------------------------------------------------------------------------------------------------------------------------------------------------------------------------------------------------------------------------------------------------------------------------------------------------------------------------------------------------------------------------------------------------------------------------------------------------------------------------|
| <p>SW:PTN1_HUMAN P18031 homo sapiens (human). protein-tyrosine phosphatase 1b (ec 3.1.3.48) (ptp-1b). 7/1999 [MASS=49967]/Protein tyrosine phosphatase non-receptor type I, likely involved in the negative regulation of insulin receptor signaling, may be associated with type II diabetes and obesity</p>                                                                                                                                                                             |
| <p>SW:ERB2_HUMAN P04626 homo sapiens (human). receptor protein-tyrosine kinase erbB-2 precursor (ec 2.7.1.112) (p185erbB2) (neu proto-oncogene) (c-erbB-2) (tyrosine kinase-type cell surface receptor her2) [MASS=137910]/Avian erythroblastosis oncogene B 2, a receptor tyrosine kinase and most oncopotent member of the EGF receptor family, heterodimerizes with other EGFRs; overexpression contributes to growth, metastasis and chemoresistance of epithelial-derived tumors</p> |
| <p>SW:RAC1_HUMAN P15154 homo sapiens (human), mus musculus (mouse), and canis familiaris (dog). ras-related c3 botulinum toxin substrate 1 (p21-rac1) (ras-like protein tc25). 12/1998 [MASS=21450]/Ras-related C3 botulinum toxin substrate 1, a monomeric GTPase of the Rho family, involved in transducing signals that regulate proliferation, apoptosis, cytoskeletal organization, and response to oxidative stress, contributes to tumor cell invasiveness</p>                     |
| <p>PIR2:T00363 hypothetical protein KIAA0674 - human (fragment) [MASS=135179]/Member of the FKBP-type peptidyl-prolyl cis-trans isomerase family</p>                                                                                                                                                                                                                                                                                                                                      |
| <p>SW:P4HA_HUMAN P13674 homo sapiens (human). prolyl 4-hydroxylase alpha subunit precursor (ec 1.14.11.2). 11/1997 [MASS=61049]/Proline 4-hydroxylase alpha polypeptide I, catalyzes the hydroxylation of proline to form 4-hydroxyproline in collagens in an oxygen-dependent manner, plays an essential role in collagen synthesis</p>                                                                                                                                                  |
| <p>SW:PP1A_HUMAN P08129 homo sapiens (human), mus musculus (mouse), rattus norvegicus (rat), and oryctolagus cuniculus (rabbit). serine/threonine protein phosphatase pp1-alpha 1 catalytic subunit (ec 3.1.3 [MASS=37512]/Protein phosphatase 1 catalytic subunit alpha isoform, plays roles in diverse cellular signal transduction processes that involve protein dephosphorylation, regulates of cell growth and apoptosis and may be a tumor suppressor</p>                          |
| <p>PIR2:T14762 hypothetical protein DKFZp434A014.1 - human (fragment) [MASS=92341]/Member of the angiotensin-converting enzyme family of dipeptidyl carboxydipeptidases</p>                                                                                                                                                                                                                                                                                                               |
| <p>SW:UBPA_HUMAN Q14694 homo sapiens (human). ubiquitin carboxyl-terminal hydrolase 10 (ec 3.1.2.15) (ubiquitin thiolesterase 10) (ubiquitin-specific processing protease 10) (deubiquitinating enzyme 10) (k [MASS=87134]/Ubiquitin specific protease 10, a member of the ubiquitin-specific cysteine (thiol) protease family, cleaves ubiquitin from ubiquitin-conjugated protein substrates, activity is inhibited upon association with Ras-GAP SH3 domain binding protein</p>        |
| <p>SWN:UBPF_HUMAN Q9y4e8 homo sapiens (human). ubiquitin carboxyl-terminal hydrolase 15 (ec 3.1.2.15) (ubiquitin thiolesterase 15) (ubiquitin-specific processing protease 15) (deubiquitinating enzyme 15) (f [MASS=108965]/Ubiquitin-specific protease 15, a member of the ubiquitin-specific cysteine (thiol) protease family, cleaves ubiquitin from ubiquitin-conjugated protein substrates, may play a role in growth regulation</p>                                                |
| <p>SW:PDI_HUMAN P07237 homo sapiens (human). protein disulfide isomerase precursor (pdi) (ec 5.3.4.1) (prolyl 4-hydroxylase beta subunit) (cellular thyroid hormone binding protein) (p55). 5/2000 [MASS=57116]/Procollagen-proline 2-oxoglutarate 4-dioxygenase (proline 4-hydroxylase) beta polypeptide (protein disulfide isomerase- thyroid hormone binding protein p55), acts as a protein folding catalyst and promotes protein solubility</p>                                      |
| <p>SW:GNT2_HUMAN Q10469 h alpha-1,6-mannosyl-glycoprotein beta-1,2-n- acetylglucosaminyltransferase (ec 2.4.1.143) (n-glycosyl- oligosaccharide-glycoprotein n-acetylglucosaminyltransferase ii) (beta-1,2-n- [MASS=51550]/UDP-N-acetylglucosamine: alpha-6-D-mannoside-beta-1,2- N-acetylglucosaminyltransferase II, catalyzes the conversion of oligomannose to complex N-glycans; activity is reduced or absent in type II congenital disorders of glycosylation</p>                   |
| <p>SW:EPA7_HUMAN Q15375 homo sapiens (human). ephrin type-a receptor 7 precursor (ec 2.7.1.112) (tyrosine-protein kinase receptor ehk-3) (eph homology kinase-3) (receptor protein- tyrosine kinase hek11). 5 [MASS=112097]/ Ephrin type A receptor 7, an Eph-related receptor tyrosine kinase, interacts with the PDZ domain of the Ras binding protein AF6 (MLLT4), may be involved in cell signaling</p>                                                                               |
| <p>SW:INSR_HUMAN P06213 homo sapiens (human). insulin receptor precursor (ec 2.7.1.112) (ir). 5/2000 [MASS=156281]/Insulin receptor, a transmembrane receptor protein tyrosine kinase involved in carbohydrate metabolism, energy pathways, and cell growth; gene mutation is associated with insulin-resistant diabetes mellitus and leprechaunism</p>                                                                                                                                   |
| <p>GP:AB028128_1 Homo sapiens DPM3 mRNA for dolichol-phosphate-mannose synthase, complete cds. [MASS=10080]/Dolichyl-phosphate mannosyltransferase subunit 3 (prostin 1), part of a complex that produces mannosyl donors for glycoconjugate biosynthesis, stabilizes DPM1 and is stabilized by DPM2; expression is associated with a lack of invasive potential in tumors</p>                                                                                                            |
| <p>SW:UBC1_HUMAN P50550 homo sapiens (human), mus musculus (mouse), and xenopus laevis (african clawed frog). ubiquitin-conjugating enzyme e2-18 kda (ec 6.3.2.19) (ubiquitin-protein ligase) (ubiquitin carr [MASS=18007]/Ubiquitin-conjugating enzyme E21, member of the ubiquitin-conjugating enzyme family that catalyzes the ubiquitination of cellular proteins and marks them for degradation, may play roles in cell cycle progression and repair of TOP1-mediated DNA damage</p> |
| <p>SW:KAPA_HUMAN P17612 homo sapiens (human). camp-dependent protein kinase, alpha-catalytic subunit (ec 2.7.1.37) (pka c-alpha). 5/2000 [MASS=40458]/Catalytic subunit C alpha of cAMP-dependent protein kinase, plays a role in transcriptional regulation and may mediate suppression of apoptosis, may also serve as a tumor biomarker; alternative form C alpha 2 may play a role in sperm development</p>                                                                           |
| <p>SW:BCR_HUMAN P11274 homo sapiens (human). breakpoint cluster region protein (ec 2.7.1.-). 7/1999 [MASS=142806]/Breakpoint cluster region, GTPase-activating protein for p21rac with serine/threonine kinase activity; translocation of the corresponding gene is associated with Philadelphia chromosome-positive chronic myeloid leukemia</p>                                                                                                                                         |

|                                                                                                                                                                                                                                                                                                                                                                                                                                                                             |
|-----------------------------------------------------------------------------------------------------------------------------------------------------------------------------------------------------------------------------------------------------------------------------------------------------------------------------------------------------------------------------------------------------------------------------------------------------------------------------|
| <p>PIR2:I37405 polypeptide N-acetylgalactosaminyltransferase (EC 2.4.1.41) - human [MASS=64733]/N-acetylgalactosaminyltransferase T1, enzyme that initiates O-glycosylation; inhibition affects the sensitivity of tumors cells to immune killer cells</p>                                                                                                                                                                                                                  |
| <p>SWN:DUSC_HUMAN Q9uni6 homo sapiens (human). dual specificity protein phosphatase 12 (ec 3.1.3.48) (ec 3.1.3.16) (dual-specificity tyrosine phosphatase yvh1). 8/2001 [MASS=37687]/Dual specificity phosphatase 12, binds zinc via a zinc-finger motif in the carboxyl terminus, may play a role in cell growth; genetic variants may be associated with cancer susceptibility</p>                                                                                        |
| <p>SW:P2BA_HUMAN Q08209 homo sapiens (human). serine/threonine protein phosphatase 2b catalytic subunit, alpha isoform (ec 3.1.3.16) (calmodulin-dependent calcineurin a subunit, alpha isoform) (cam-prp cat [MASS=58688]/Calcineurin A alpha, catalytic subunit of calcium/calmodulin regulated protein phosphatase, regulates activity of transcription factors involved in signal transduction and growth control</p>                                                   |
| <p>PIR2:JC5938 thioredoxin-like protein - human [MASS=32251]/Thioredoxin-like 32, a thioredoxin related protein that has thioredoxin-like reducing activity</p>                                                                                                                                                                                                                                                                                                             |
| <p>SW:OGT1_HUMAN O15294 homo sapiens (human). udp-n-acetylglucosamine-peptide n-acetylglucosaminyltransferase 100 kda subunit (ec 2.4.1.-) (o-glcnac transferase p100 subunit). 5/2000 [MASS=103012]/O-linked N-acetylglucosamine transferase (UDP-N-acetylglucosamine:polypeptide-N-acetylglucosaminyltransferase), enzyme that functions in O-glycosylation, may be involved in insulin secretion and glucose homeostasis, may play a role in signal transduction</p>     |
| <p>GP:D87116_1 Human mRNA for MAP kinase kinase 3b, complete cds; MKK3b. [MASS=39318]/Mitogen activated protein kinase kinase 3, phosphorylates MAP kinase p38, involved in stress and inflammatory responses, senescence, and apoptosis, also has roles in ischemic kidney injury, and H. influenzae infection</p>                                                                                                                                                         |
| <p>SW:PPOL_HUMAN P09874 homo sapiens (human). poly [adp-ribose] polymerase (ec 2.4.2.30) (parp) (adprt) (nad(+) adp-ribosyltransferase) (poly[adp-ribose] synthetase). 11/1997 [MASS=112953]/ADP-ribosyltransferase, catalyzes formation of ADP ribose polymers attached to proteins using NAD(+) as substrate in response to DNA damage, modulates chromatin structure and plays a role in DNA repair and apoptosis</p>                                                    |
| <p>SW:PTPF_HUMAN P10586 homo sapiens (human). lar protein precursor (leukocyte antigen related) (ec 3.1.3.48). 10/1994 [MASS=211845]/Protein tyrosine phosphatase receptor-type F (leukocyte common antigen related), regulates insulin receptor signaling and cell migration, inhibits tumor formation in nude mice</p>                                                                                                                                                    |
| <p>SW:PSS1_HUMAN P48651 homo sapiens (human). phosphatidylserine synthase i (serine-exchange enzyme i) (ec 2.7.8.-) (kiaa0024). 11/1997 [MASS=55528]/3'-phosphoadenosine 5'-phosphosulfate synthase 1, bifunctional polypeptide with ATP sulfurylase and adenosine 5'-phosphosulfate kinase activities, required for the synthesis of the sulfonate donor 3'-phosphoadenosine 5'-phosphosulfate</p>                                                                         |
| <p>SW:PPT_HUMAN P50897 homo sapiens (human). palmitoyl-protein thioesterase precursor (ec 3.1.2.22) (palmitoyl- protein hydrolase). 5/2000 [MASS=34193]/Palmitoyl-protein thioesterase (ceroid-lipofuscinosis, neuronal 1, infantile), catalyzes the hydrolysis of palmitate from S-acetylated cysteine residues, may be involved in apoptosis; gene mutation is detected in infantile neuronal ceroid lipofuscinosis</p>                                                   |
| <p>SW:PTK7_HUMAN Q13308 homo sapiens (human). tyrosine-protein kinase-like 7 precursor (colon carcinoma kinase-4) (cck-4). 5/2000 [MASS=118260]/Protein tyrosine kinase 7 (colon carcinoma kinase-4), a glycosylated member of the receptor protein tyrosine kinase family that may be involved in tumorigenesis, likely to be catalytically inactive due to alterations within the RTK consensus sequences</p>                                                             |
| <p>PIR2:A57099 DNA-activated protein kinase, catalytic subunit - human [MASS=465428]/DNA-dependent protein kinase catalytic subunit, a DNA-binding protein kinase involved in DNA double-strand break repair and somatic recombination of antibody genes; absence of mouse Prkdc is associated with severe combined immunodeficiency</p>                                                                                                                                    |
| <p>SW:RB48_HUMAN Q09028 homo sapiens (human). chromatin assembly factor 1 p48 subunit (caf-1 p48 subunit) (retinoblastoma binding protein p48) (retinoblastoma-binding protein 4) (msi1 protein homolog). 12/ [MASS=47656]/Retinoblastoma binding protein 4, a nuclear protein that forms complexes with a variety of proteins including RB1, HDAC1, BRCA1, E2F, which function in histone acetylation, regulation of cell proliferation, or transcriptional repression</p> |
| <p>SW:RL40_HUMAN P14793 homo sapiens (human), rattus norvegicus (rat), and gallus gallus (chicken). 60s ribosomal protein l40 (cep52). 11/1997 [MASS=6181]/Ubiquitin A-52 residue ribosomal protein fusion product 1, protein consisting of ubiquitin at the N-terminus and ribosomal protein L40 at the C-terminus; the corresponding gene is upregulated in colon cancer but not in gastric cancer</p>                                                                    |
| <p>SW:KC2B_HUMAN P13862 homo sapiens (human), mus musculus (mouse), rattus norvegicus (rat), bos taurus (bovine), sus scrofa (pig), oryctolagus cuniculus (rabbit), and gallus gallus (chicken). casein kinase [MASS=24942]/Casein kinase II beta subunit, regulatory subunit of casein kinase II (CK2), confers stability and specificity to CK2 catalytic subunits, may mediate formation of the tetrameric CK2 complex, and may be involved in heat stress response</p>  |
| <p>SW:MA2B_HUMAN O00754 homo sapiens (human). lysosomal alpha-mannosidase precursor (ec 3.2.1.24) (mannosidase, alpha b) (lysosomal acid alpha-mannosidase) (laman). 5/2000 [MASS=113673]/Mannosidase alpha class 2B member 1, catalyzes the hydrolysis of alpha-mannoside linkages in glycoprotein catabolism, enzyme activity is inhibited by azafuranose analogs of mannose, deficiency is associated with alpha-mannosidosis</p>                                        |
| <p>GP:X92689_1 Homo sapiens mRNA for UDP-GalNAc:polypeptide N-acetylgalactosaminyl transferase (GalNAc-T3). [MASS=72638]/N-acetylgalactosaminyltransferase T3 (UDP-N-acetyl-alpha-D-galactosamine:polypeptide N-acetylgalactosaminyltransferase 3), enzyme that initiates O-glycosylation; elevated levels may be associated with differentiation of adenocarcinomas</p>                                                                                                    |

|                                                                                                                                                                                                                                                                                                                                                                                                                                                                                         |
|-----------------------------------------------------------------------------------------------------------------------------------------------------------------------------------------------------------------------------------------------------------------------------------------------------------------------------------------------------------------------------------------------------------------------------------------------------------------------------------------|
| GP:AB000449_1 Homo sapiens mRNA for VRK1, complete cds. [MASS=45476]/Vaccinia related kinase 1, nuclear serine/threonine kinase that phosphorylates acidic and basic protein substrates, may activate p53 and function in signal transduction, may regulate cellular proliferation, has similarity to vaccinia virus B1R kinase                                                                                                                                                         |
| SW:CAG4_HUMAN Q11201 h cmp-n-acetylneuraminate-beta-galactosamide-alpha-2,3-sialyltransferase (ec 2.4.99.4) (beta-galactoside alpha-2,3-sialyltransferase) (alpha 2,3-st) (gal-nac6s) (gal-beta-1,3-galnac [MASS=39075]/Sialyltransferase 4A (beta-galactoside alpha-2,3-sialyltransferase), member of a sialyltransferase 4 family, catalyzes the transfer of NeuAc from CMP-NeuAc to asialo-fetuin                                                                                    |
| SW:RS12_HUMAN P25398 homo sapiens (human). 40s ribosomal protein s12. 5/2000 [MASS=14395]/Ribosomal protein S12, a component of the small 40S ribosomal subunit; overexpressed in colorectal cancer                                                                                                                                                                                                                                                                                     |
| PIR2:JC4775 p58k protein - human [MASS=57580]/The 58,000-dalton cellular inhibitor of the interferon-induced double-stranded RNA-activated protein kinase (PKR) is a member of the tetratricopeptide repeat family of proteins/DnaJ (Hsp40) homolog subfamily C member 3 (protein kinase inhibitor p58), a member of the tetratricopeptide repeat family of proteins that may act as a cochaperone that inhibits the activity of double-stranded RNA-dependent protein kinase (PRKR)    |
| SW:SYTC_HUMAN P26639 homo sapiens (human). threonyl-trna synthetase, cytoplasmic (ec 6.1.1.3) (threonine--trna ligase) (thtrs). 6/1994 [MASS=82124]/Threonyl-tRNA synthetase, a class II aminoacyl tRNA synthetase which aminoacylates its cognate tRNAs with threonine for protein synthesis, autoantigen in several autoimmune disorders                                                                                                                                              |
| SW:IF2P_HUMAN O60841 homo sapiens (human). translation initiation factor if-2. 5/2000 [MASS=138755]/Translation initiation factor, member of the Tu elongation factor family, has moderate similarity to yeast YAL035W translation initiation factor 2 (eIF2)                                                                                                                                                                                                                           |
| SW:RL7A_HUMAN P11518 homo sapiens (human), and rattus norvegicus (rat). 60s ribosomal protein l7a (surfeit locus protein 3) (pla-x polypeptide). 7/1999 [MASS=29864]/Ribosomal protein L7a (surfeit-3), a putative component of the 60S ribosomal subunit, likely to be involved in protein biosynthesis and in colorectal carcinogenesis; trk-2h fusion oncogene in breast cancer cells comprises a fragment of RPL7A fused to TRK                                                     |
| SW:SYG_HUMAN P41250 homo sapiens (human). glycyl-trna synthetase (ec 6.1.1.14) (glycine--trna ligase) (glyrs). 10/1996 [MASS=77531]/Glycyl-tRNA synthetase; functions in protein biosynthesis, aminoacylates its cognate tRNAs with phenylalanine/Glycyl-tRNA synthetase, a class II aminoacyl-tRNA synthetase that catalyzes aminoacylation of its cognate tRNA with glycine for protein biosynthesis; an autoantigen in dermatomyositis                                               |
| SW:IF32_HUMAN Q13347 homo sapiens (human). eukaryotic translation initiation factor 3 subunit 2 (eif-3 beta) (eif3 p36) (tgf-beta receptor interacting protein 1) (trip-1). 5/2000 [MASS=36502]/Eukaryotic translation initiation factor 3 subunit 2, an eIF3 subunit with a predicted role in translation initiation, binds transforming growth factor beta receptor II (TGFB2) and acts as a modulator of TGFB2 signaling pathways                                                    |
| SW:RS4_HUMAN P12750 homo sapiens (human), rattus norvegicus (rat), mus musculus (mouse), mesocricetus auratus (golden hamster), and felis silvestris catus (cat). 40s ribosomal protein s4, x isoform (sin [MASS=29467]/Ribosomal protein S4 X-linked, a component of the small 40S ribosomal subunit with roles in translation, cell cycle, and cell proliferation; gene is X-linked but escapes X inactivation, and may therefore contribute to haploinsufficiency in Turner syndrome |
| SW:SYD_HUMAN P14868 homo sapiens (human). aspartyl-trna synthetase (ec 6.1.1.12) (aspartate--trna ligase) (asprs). 11/1997 [MASS=57192]/Aspartyl-tRNA synthetase, a class II aminoacyl tRNA synthetase that aminoacylates its cognate tRNA with aspartate for protein biosynthesis, associates with a multisynthetase complex, N-terminus may aid interaction with elongation factor 1 alpha                                                                                            |
| SW:EF11_HUMAN P04720 homo sapiens (human), and oryctolagus cuniculus (rabbit). elongation factor 1-alpha 1 (ef-1-alpha-1) (elongation factor tu) (ef-tu). 12/1998 [MASS=50141]/Eukaryotic translation elongation factor 1 alpha 1, involved in cytoskeletal rearrangement, has putative roles in translational elongation and senescence and GTP binding; possibly involved in diabetes, Felty syndrome, and HIV life cycle                                                             |
| SW:SYA_HUMAN P49588 homo sapiens (human). alanyl-trna synthetase (ec 6.1.1.7) (alanine--trna ligase) (alars). 7/1998 [MASS=106801]/Alanyl-tRNA synthetase, aminoacylates its cognate tRNA with alanine for protein biosynthesis, acts as an autoantigen in patients with polymyositis                                                                                                                                                                                                   |
| SW:SYR_HUMAN P54136 homo sapiens (human). arginyl-trna synthetase (ec 6.1.1.19) (arginine--trna ligase) (argrs). 5/2000 [MASS=74977]/Arginyl-tRNA synthetase, aminoacylates its cognate tRNAs with arginine for protein biosynthesis                                                                                                                                                                                                                                                    |
| SW:SYM_HUMAN P56192 homo sapiens (human). methionyl-trna synthetase (ec 6.1.1.10) (methionine--trna ligase) (metrs). 12/1998 [MASS=101129]/Methionine-tRNA synthetase, putative tRNA synthetase that is predicted to aminoacylate its cognate tRNAs with methionine for protein biosynthesis, required for rRNA synthesis in the nucleolus                                                                                                                                              |
| SW:RL8_HUMAN P25120 homo sapiens (human), rattus norvegicus (rat), and mus musculus (mouse). 60s ribosomal protein l8. 5/2000 [MASS=28025]/Ribosomal protein L8, putative component of the large 60S ribosomal subunit                                                                                                                                                                                                                                                                  |
| PIR2:B55053 endothelial monocyte-activating protein II precursor - human [MASS=34254]/Endothelial monocyte activating polypeptide II, a proinflammatory cytokine that interacts with ATP synthase and inhibits endothelial cell growth, released during apoptosis, may sensitize tumors to killing by tumor necrosis factor alpha (TNF)                                                                                                                                                 |
| SW:SYEP_HUMAN P07814 homo sapiens (human). multifunctional aminoacyl-trna synthetase [includes: glutamyl-trna synthetase (ec 6.1.1.17) (glutamate--trna ligase); prolyl-trna synthetase (ec 6.1.1.15) (pro [MASS=163026]/Glutamyl-prolyl-tRNA synthetase, a bifunctional enzyme with two functionally separable domains, one that aminoacylates prolyl-tRNA with proline and another that is believed to aminoacylate glutamyl-tRNA with glutamate for protein biosynthesis             |

|                                                                                                                                                                                                                                                                                                                                                                                                                           |
|---------------------------------------------------------------------------------------------------------------------------------------------------------------------------------------------------------------------------------------------------------------------------------------------------------------------------------------------------------------------------------------------------------------------------|
| <p>SWN:E2BD_HUMAN Q9ui10 homo sapiens (human). translation initiation factor eif-2b delta subunit (eif-2b gdp-gtp exchange factor). 8/2001 [MASS=57599]/Protein with strong similarity to eukaryotic translation initiation factor 2B delta subunit (rat Eif2b), which is a guanine nucleotide-exchange factor subunit of eIF-2B that mediates inhibition of eIF-2B, member of the initiation factor 2 subunit family</p> |
| <p>SW:SYQ_HUMAN P47897 homo sapiens (human). glutaminyl-trna synthetase (ec 6.1.1.18) (glutamine--trna ligase) (glnrs). 5/2000 [MASS=87799]/Glutaminyl-tRNA synthetase, aminoacylates cognate tRNAs with glutamine for protein biosynthesis, also suppresses FAS (TNFRSF6)-mediated apoptosis by inhibiting ASK1 (MAP3K5) kinase activity, contains N-terminal appended and C-terminal catalytic domains</p>              |
| <p>SW:SYV_HUMAN P26640 homo sapiens (human). valyl-trna synthetase (ec 6.1.1.9) (valine--trna ligase) (valrs). 2/1996 [MASS=140377]/Valyl-tRNA synthetase 2, a putative class I tRNA synthetase, predicted to function in aminoacylation of valyl tRNAs for protein biosynthesis</p>                                                                                                                                      |
| <p>SW:IF5A_HUMAN P10159 homo sapiens (human). initiation factor 5a (eif-5a) (eif-4d) (rev binding factor). 5/2000 [MASS=16701]/Eukaryotic initiation factor 5A, a translation initiation factor, also an HIV-1 transactivator protein Rev cofactor that exports viral mRNA from the nucleus</p>                                                                                                                           |
| <p>SW:RM03_HUMAN P09001 homo sapiens (human). mitochondrial 60s ribosomal protein l3. 8/1992 [MASS=38633]/Mitochondrial ribosomal protein L3, a likely component of the large mitochondrial 60S ribosomal subunit, may be involved in mRNA binding to the ribosome, can interact with the 3' UTR of hepatitis C; elevated levels are associated with hepatocarcinoma</p>                                                  |
| <p>SWN:SU12_HUMAN Q9unq9 homo sapiens (human). protein translation factor sui1 homolog a121. 8/2001 [MASS=12745]/Translation factor sui1 homolog, a translation initiation factor, plays a role in initiating translation, may modulate translation initiation during periods of cell stress such as UV-induced and endoplasmic reticulum stress</p>                                                                      |
| <p>SW:RL32_HUMAN P02433 homo sapiens (human), mus musculus (mouse), and rattus norvegicus (rat). 60s ribosomal protein l32. 6/1994 [MASS=15729]/Ribosomal protein L32, an RNA-binding structural component of the large 60S ribosomal subunit that is likely to play a role in protein biosynthesis</p>                                                                                                                   |
| <p>GP:AF112214_1 Homo sapiens ribosomal protein L13 mRNA, complete cds; RPL13. [MASS=19917]/Ribosomal protein L13, putative component of the 60S ribosomal subunit, expressed at higher levels in benign breast lesions than in carcinomas</p>                                                                                                                                                                            |
| <p>SW:SYK_HUMAN Q15046 homo sapiens (human). lysyl-trna synthetase (ec 6.1.1.6) (lysine--trna ligase) (lysr) (kiaa0070). 7/1998 [MASS=68034]/Lysyl-tRNA synthetase, a class II aminoacyl tRNA synthetase, aminoacylates its cognate tRNAs with lysine for protein biosynthesis, packaged into HIV virions, exists as cytoplasmic and mitochondrial alternative forms</p>                                                  |
| <p>GP:AB037819_1 Homo sapiens mRNA for KIAA1398 protein, partial cds; Start codon is not identified.. [MASS=170212]/Ribosome binding protein 1, a putative ribosome receptor, may play a role in protein biosynthesis, appears to be involved in cardiac development, may play a role in cardiac remodeling in heart failure</p>                                                                                          |
| <p>GP:AF132941_1 Homo sapiens CGI-07 protein mRNA, complete cds. [MASS=57585]/Protein with moderate similarity to S. cerevisiae Nmd3p, which is a protein involved in the nuclear export of 60S ribosomal subunits</p>                                                                                                                                                                                                    |
| <p>SW:EF1G_HUMAN P26641 homo sapiens (human). elongation factor 1-gamma (ef-1-gamma). 5/2000 [MASS=50119]/Eukaryotic elongation factor 1 gamma, a likely translation elongation factor 1 (EF-1) complex component that binds cytoplasmic cysteinyl-tRNA synthetase and possibly EF-1 beta; overexpression in gastric carcinoma correlates with vascular permeation</p>                                                    |
| <p>SW:RS8_HUMAN P09058 homo sapiens (human), rattus norvegicus (rat), and mus musculus (mouse). 40s ribosomal protein s8. 2/1996 [MASS=24074]/Ribosomal protein S8, component of the small 40S ribosomal subunit</p>                                                                                                                                                                                                      |
| <p>SW:IF4G_HUMAN Q04637 homo sapiens (human). eukaryotic translation initiation factor 4 gamma (eif-4-gamma) (eif-4g) (eif4g) (p220). 7/1999 [MASS=153361]/Eukaryotic translation initiation factor 4 gamma 1, gamma subunit of eIF4, functions in translation initiation, binds RNA and forms a bridge between the mRNA cap and polyA tail, cleaved during apoptosis and poliovirus infection</p>                        |
| <p>SW:EF2_HUMAN P13639 homo sapiens (human). elongation factor 2 (ef-2). 12/1998 [MASS=95338]/Translation elongation factor 2, member of the superfamily of GTP hydrolases, binds ribosomes, catalyzes the translocation step of peptide elongation in protein biosynthesis, target of ADP-ribosylation by diphtheria toxin and Pseudomonas exotoxin</p>                                                                  |
| <p>SW:SYI_HUMAN P41252 homo sapiens (human). isoleucyl-trna synthetase, cytoplasmic (ec 6.1.1.5) (isoleucine--trna ligase) (ilers) (irs). 7/1999 [MASS=144959]/Isoleucine-tRNA synthetase, a class I aminoacyl tRNA synthetase, aminoacylates isoleucyl-tRNA with isoleucine for protein biosynthesis, acts as an autoantigen in some autoimmune diseases</p>                                                             |
| <p>GP:AF132939_1 Homo sapiens CGI-04 protein mRNA, complete cds. [MASS=53063]/Member of the class I tryptophanyl and tyrosyl (W and Y) tRNA synthetase family, has low similarity to tyrosyl-tRNA synthetase mitochondrial (S. cerevisiae Msy1p), which is involved in tyrosyl-tRNA aminoacylation</p>                                                                                                                    |
| <p>SW:IF38_HUMAN Q99613 homo sapiens (human). eukaryotic translation initiation factor 3 subunit 8 (eif3 p110). 5/2000 [MASS=105344]/Translation initiation factor 3 subunit 8, 110 kDa eIF3 subunit that recruits translation initiation factor 1 (human SUI1) to 40S ribosomes, interacts with viral internal ribosome entry sites, and may be involved in seminoma development</p>                                     |
| <p>SW:RL3_HUMAN P39023 homo sapiens (human). 60s ribosomal protein l3 (hiv-1 tar rna binding protein b) (tarbp-b). 5/2000 [MASS=45978]/Ribosomal protein L3, component of the large 60S ribosomal subunit; overexpressed in rapidly dividing cells</p>                                                                                                                                                                    |

|                                                                                                                                                                                                                                                                                                                                                                                                                                                                                       |
|---------------------------------------------------------------------------------------------------------------------------------------------------------------------------------------------------------------------------------------------------------------------------------------------------------------------------------------------------------------------------------------------------------------------------------------------------------------------------------------|
| SW:E2BE_HUMAN Q13144 homo sapiens (human). translation initiation factor eif-2b epsilon subunit (eif-2b gdp-gtp exchange factor) (fragment). 7/1999 [MASS=72237]/Translation initiation factor 2B subunit 5 (epsilon, 82kD), putative guanyl-nucleotide exchange factor component of the translation initiation factor 2B complex, predicted to mediate the exchange of GDP bound to translation initiation factor eIF2 for GTP                                                       |
| SW:RL9_HUMAN P32969 homo sapiens (human). 60s ribosomal protein l9. 5/2000 [MASS=21863]/Ribosomal protein L9, putative component of the large 60S ribosomal subunit                                                                                                                                                                                                                                                                                                                   |
| SW:RS5_HUMAN P46782 homo sapiens (human). 40s ribosomal protein s5. 5/2000 [MASS=22777]/Ribosomal protein S5, a component of the 40S ribosomal subunit; gene expression is altered in colorectal carcinoma cells                                                                                                                                                                                                                                                                      |
| SW:RS25_HUMAN P25111 homo sapiens (human), and rattus norvegicus (rat). 40s ribosomal protein s25. 10/1993 [MASS=13742]/Ribosomal protein S25, a putative RNA-binding component of the small 40S ribosomal subunit that may play a role in protein biosynthesis                                                                                                                                                                                                                       |
| SW:IF2A_HUMAN P05198 homo sapiens (human). eukaryotic translation initiation factor 2 alpha subunit (eif-2- alpha). 7/1999 [MASS=35981]/Eukaryotic translation initiation factor 2 subunit 1 (alpha subunit of eIF2), a translation initiation factor, involved in translational regulation, inhibited by phosphorylation                                                                                                                                                             |
| SW:RS29_HUMAN P30054 homo sapiens (human), mus musculus (mouse), rattus norvegicus (rat), and bos taurus (bovine). 40s ribosomal protein s29. 5/2000 [MASS=6546]/Ribosomal protein S29, a component of the small 40S ribosomal subunit, contains a zinc finger-like motif, enhances activity of the tumor suppressor Krev-1 (RAP1A)                                                                                                                                                   |
| SW:RS14_HUMAN P06366 homo sapiens (human), and cricetus griseus (chinese hamster). 40s ribosomal protein s14. 8/1992 [MASS=16273]/Ribosomal protein S14, a putative component of the small 40S ribosomal subunit, may play a role in protein biosynthesis, may bind RNA, upregulated in prostate carcinoma cell lines                                                                                                                                                                 |
| SW:EF12_HUMAN Q05639 homo sapiens (human). elongation factor 1-alpha 2 (ef-1-alpha-2) (statin s1). 12/1998 [MASS=50470]/Eukaryotic translation elongation factor 1 alpha 2, a putative translation elongation factor, upregulated in an estrogen receptor-expressing breast carcinoma cell line; mutation in mouse Eef1a2 causes the multiple-defect wasted phenotype                                                                                                                 |
| SW:PAB1_HUMAN P11940 homo sapiens (human). polyadenylate-binding protein 1 (poly(a) binding protein 1) (pabp 1). 7/1998 [MASS=70671]/Poly(A)-binding protein cytoplasmic 1, binds to poly(A) tails of mRNA and plays roles in regulating mRNA stability and translation, also implicated in mRNA transport from the nucleus to the cytoplasm                                                                                                                                          |
| SW:IF2G_HUMAN P41091 homo sapiens (human). eukaryotic translation initiation factor 2 gamma subunit (eif-2- gamma). 5/2000 [MASS=50978]/Eukaryotic initiation factor 2G, gamma subunit of the heterotrimeric GTP binding protein involved in recruitment of Met-tRNAi to the 40S ribosomal subunit, activity is regulated by herpes simplex virus type 1 gamma 34.5 and by the cellular GADD34 proteins                                                                               |
| SW:IF37_HUMAN O15371 homo sapiens (human). eukaryotic translation initiation factor 3 subunit 7 (eif-3 zeta) (eif3 p66). 5/2000 [MASS=63973]/Eukaryotic translation initiation factor 3 subunit 7, mRNA-binding subunit of the translation initiation factor 3 complex, which mediates dissociation of 80S ribosomes and stabilizes initiator Met-tRNAi binding to 40S subunits                                                                                                       |
| SW:RL4_HUMAN P36578 homo sapiens (human). 60s ribosomal protein l4 (l1). 12/1998 [MASS=47759]/Ribosomal protein L4, a putative component of the large 60S ribosomal subunit, may bind RNA                                                                                                                                                                                                                                                                                             |
| SW:RS17_HUMAN P08708 homo sapiens (human). 40s ribosomal protein s17. 8/1992 [MASS=15419]/Ribosomal protein S17, component of the small 40S ribosomal subunit                                                                                                                                                                                                                                                                                                                         |
| SW:RS3A_HUMAN P49241 homo sapiens (human), and felis silvestris catus (cat). 40s ribosomal protein s3a. 5/2000 [MASS=29814]/Ribosomal protein S3A (v fos transformation effector), component of the 40S ribosomal subunit, may play roles in apoptosis, cell growth and protein biosynthesis                                                                                                                                                                                          |
| GP:AF257077_1 Homo sapiens eukaryotic translation initiation factor EIF2B subunit 3 (EIF2B3) mRNA, complete cds; eukaryotic translation initiation factor EIF2Bgamma; guanine nucleotide exchange factor. [MASS=50240]/Eukaryotic translation initiation factor 2B gamma subunit, has a putative role in the initiation of protein synthesis; acts as a cofactor for hepatitis C virus IRES-mediated translation                                                                      |
| SWN:SYFB_HUMAN Q9nsd9 homo sapiens (human). phenylalanyl-trna synthetase beta chain (ec 6.1.1.20) (phenylalanine--trna ligase beta chain) (phers) (protein hspc173). 8/2001 [MASS=66130]/Phenylalanyl-tRNA synthetase beta-subunit, regulatory subunit that forms heterodimers with the catalytic alpha subunit (FARSL), involved in protein synthesis, may play a role in tumorigenic events                                                                                         |
| SW:SR09_HUMAN P49458 homo sapiens (human). signal recognition particle 9 kda protein (srp9). 12/1998 [MASS=9981]/Signal recognition particle 9 kDa, a subunit of the signal recognition particle that forms the Alu RNA-binding protein and binds to Alu RNA with SRP14, involved in translocation of newly synthesized proteins across the membrane of the rough ER                                                                                                                  |
| SW:RL23_HUMAN P23131 homo sapiens (human), rattus norvegicus (rat), and sus scrofa (pig). 60s ribosomal protein l23 (l17). 7/1999 [MASS=14865]/Ribosomal protein L23, a putative large ribosomal subunit component that is likely to play a role in protein biosynthesis                                                                                                                                                                                                              |
| SW:RS21_HUMAN P35265 homo sapiens (human), and sus scrofa (pig). 40s ribosomal protein s21. 5/2000 [MASS=9111]/Ribosomal protein S21, component of the small 40S ribosomal subunit                                                                                                                                                                                                                                                                                                    |
| SW:ERF1_HUMAN P46055 homo sapiens (human), mesocricetus auratus (golden hamster), and oryctolagus cuniculus (rabbit). eukaryotic peptide chain release factor subunit 1 (erf1) (tb3-1) (c11 protein). 5/20 [MASS=49031]/ Eukaryotic translation termination factor 1, an RNA binding translation release factor involved in translation termination, expression is increased in H. pylori infected gastric cancer cells; may be candidate gene for certain malignant myeloid diseases |



|                                                                                                                                                                                                                                                                                                                                                                                                                                               |
|-----------------------------------------------------------------------------------------------------------------------------------------------------------------------------------------------------------------------------------------------------------------------------------------------------------------------------------------------------------------------------------------------------------------------------------------------|
| SW:RL5_HUMAN P46777 homo sapiens (human). 60s ribosomal protein l5. 7/1999 [MASS=34317]/Ribosomal protein L5, a putative component of the 60S ribosomal subunit, binds 5S rRNA, undergoes nuclear export, may play a role in rev-mediated HIV-1 RNA nucleocytoplasmic transport; expression is altered in colorectal cancer and astrocytomas                                                                                                  |
| ATP-binding cassette subfamily F member 1, a member of the ATP-binding cassette family that does not contain a transmembrane domain and may play a role in translation                                                                                                                                                                                                                                                                        |
| SW:RS11_HUMAN P04643 homo sapiens (human), rattus norvegicus (rat), and mus musculus (mouse). 40s ribosomal protein s11. 5/2000 [MASS=18431]/Ribosomal protein S11, putative component of the small 40S ribosomal subunit                                                                                                                                                                                                                     |
| SW:RLA0_HUMAN P05388 homo sapiens (human). 60s acidic ribosomal protein p0 (l10e). 5/2000 [MASS=34274]/Ribosomal protein P0, acidic phosphoprotein component of the large 60S ribosomal subunit; shows increased expression in hepatocellular and colon carcinomas                                                                                                                                                                            |
| SW:R27A_HUMAN P14798 homo sapiens (human), and cavia porcellus (guinea pig). 40s ribosomal protein s27a. 5/2000 [MASS=9418]/Ribosomal protein S27a, component of the small ribosomal subunit, consists of ubiquitin at the N-terminus and ribosomal protein S27a at the C-terminus; overexpressed in colon and renal cancers                                                                                                                  |
| SW:R10A_HUMAN P53025 homo sapiens (human). 60s ribosomal protein l10a (csa-19). 10/1996 [MASS=24859]/Ribosomal protein L10a, a component of the large 60S ribosomal subunit; expression in the thymus is downregulated by cyclosporin-A                                                                                                                                                                                                       |
| SW:EFTU_HUMAN P49411 homo sapiens (human). elongation factor tu, mitochondrial precursor (p43). 12/1998 [MASS=49542]/Tu translation elongation factor (mitochondrial), a putative translation elongation factor, may be involved in protein biosynthesis, upregulated in some tumors                                                                                                                                                          |
| SW:SYN_HUMAN O43776 homo sapiens (human), asparaginyl-trna synthetase, cytoplasmic (ec 6.1.1.22) (asparagine-- trna ligase) (asnr). 5/2000 [MASS=62943]/Asparaginyl-tRNA synthetase, a class II aminoacyl tRNA synthetase, aminoacylates its cognate tRNAs with asparagine for protein biosynthesis, acts as an autoantigen in patients with inflammatory myopathy in interstitial lung disease                                               |
| SW:IF39_HUMAN P55884 homo sapiens (human). eukaryotic translation initiation factor 3 subunit 9 (eif-3 eta) (eif3 p116) (eif3 p110). 5/2000 [MASS=92492]/Eukaryotic translation initiation factor 3 subunit (EIF3 subunit eta), the 116 kDa subunit of the EIF3 complex that plays a role in protein synthesis initiation                                                                                                                     |
| SW:RL2A_HUMAN P46776 homo sapiens (human). 60s ribosomal protein l27a. 5/2000 [MASS=16430]/Ribosomal protein L27a, component of the large 60S ribosomal subunit; gene is abnormally expressed in colorectal carcinomas                                                                                                                                                                                                                        |
| SW:RSP4_HUMAN P08865 homo sapiens (human). 40s ribosomal protein sa (p40) (34/67 kda laminin receptor) (colon carcinoma laminin-binding protein) (nem/1chd4). 5/2000 [MASS=32854]/Laminin receptor 1, a ribosomal protein of the small 40S ribosomal subunit, plays a role in cancer cell and basement membrane glycoprotein laminin interactions during tumor invasion and metastasis, expression correlates with cancer cell aggressiveness |
| SW:RL18_HUMAN Q07020 homo sapiens (human). 60s ribosomal protein l18. 5/2000 [MASS=21503]/Ribosomal protein L18, a component of the large 60S ribosomal subunit, a negative regulator of double-stranded RNA-activated protein kinase (PKR) which is involved in control of protein synthesis initiation; gene expression increases in colon cancer                                                                                           |
| SW:RL3L_HUMAN Q92901 homo sapiens (human). 60s ribosomal protein l3-like. 11/1997 [MASS=46165]/Ribosomal protein L3-like, a putative RNA-binding ribosome structural protein that plays a role in protein biosynthesis                                                                                                                                                                                                                        |
| SW:RS6_HUMAN P10660 homo sapiens (human), rattus norvegicus (rat), and mus musculus (mouse). 40s ribosomal protein s6 (phosphoprotein np33). 7/1998 [MASS=28681]/Ribosomal protein S6, structural component of the cytosolic small (40S) ribosomal subunit, functions in RNA binding and protein biosynthesis                                                                                                                                 |
| SW:IF34_HUMAN O75821 homo sapiens (human). eukaryotic translation initiation factor 3 subunit 4 (eif-3 delta) (eif3 p44) (eif-3 rna-binding subunit) (eif3 p42). 5/2000 [MASS=35696]/Eukaryotic translation initiation factor 3 subunit 4 (delta 44kD), a component of the eIF-3 translation initiation complex which plays a role in formation of the 40S initiator complex containing methionyl-tRNA and 40S subunit, binds RNA             |
| SW:RL10_HUMAN P27635 homo sapiens (human). 60s ribosomal protein l10 (qm protein) (tumor suppressor qm) (laminin receptor homolog). 5/2000 [MASS=24446]/Ribosomal protein L10, a component of the 60S ribosomal subunit; may be involved in the maintenance of the nontumorigenic phenotype in Wilms' microcell hybrid cells                                                                                                                  |
| SW:RL12_HUMAN P30050 homo sapiens (human). 60s ribosomal protein l12. 7/1998 [MASS=17819]/Ribosomal protein L12, a likely RNA-binding structural component of the large 60S ribosomal subunit that plays a role in protein biosynthesis; autoantibodies to ribosomal protein L12 are associated with systemic lupus erythematosus                                                                                                             |
| SW:RL14_HUMAN P50914 homo sapiens (human). 60s ribosomal protein l14 (cag-isl 7). 12/1998 [MASS=23158]/Ribosomal protein L14, a putative component of the large 60S ribosomal subunit; transcripts can contain either fixed or variable numbers of CAG triplet repeats depending on cell type                                                                                                                                                 |
| SW:RL17_HUMAN P18621 homo sapiens (human). 60s ribosomal protein l17 (l23). 5/2000 [MASS=21397]/Ribosomal protein L17, an RNA-binding structural component of the large 60S ribosomal subunit that plays a role in protein biosynthesis                                                                                                                                                                                                       |
| SW:DDX1_HUMAN Q92499 homo sapiens (human). dead box protein 1 (dead box protein-retinoblastoma) (dbp-rb). 5/2000 [MASS=82432]/DEAD box protein 1, a member of the DEAD-H box ATP-dependent RNA helicase protein family, plays a role in the processing of pre-mRNAs, may interact with CSTF2; corresponding gene is coamplified with MYC in some neuroblastoma and retinoblastoma cell lines                                                  |
| SW:R37A_HUMAN P12751 homo sapiens (human), rattus norvegicus (rat), and mus musculus (mouse). 60s ribosomal protein l37a. 2/1996 [MASS=10144]/Ribosomal protein L37a, component of the large 60S ribosomal subunit                                                                                                                                                                                                                            |

|                                                                                                                                                                                                                                                                                                                                                                                                                                                  |
|--------------------------------------------------------------------------------------------------------------------------------------------------------------------------------------------------------------------------------------------------------------------------------------------------------------------------------------------------------------------------------------------------------------------------------------------------|
| SW:IF2B_HUMAN P20042 homo sapiens (human), eukaryotic translation initiation factor 2 beta subunit (eif-2-beta). 7/1999 [MASS=38400]/Eukaryotic translation initiation factor 2 subunit 2, the beta subunit of eIF2, a translation initiation factor, involved in the initiation of protein synthesis, binds GDP                                                                                                                                 |
| SW:RL44_HUMAN P09896 homo sapiens (human), rattus norvegicus (rat), mus musculus (mouse), and sus scrofa (pig). 60s ribosomal protein l44 (l36a). 7/1998 [MASS=12310]/Ribosomal protein L44, a component of the 60S ribosomal subunit; has very strong similarity to Rpl36a, which may be part of the peptidyl transferase center                                                                                                                |
| SW:RL40_HUMAN P14793 homo sapiens (human), rattus norvegicus (rat), and gallus gallus (chicken). 60s ribosomal protein l40 (cep52). 11/1997 [MASS=6181]/Ubiquitin A-52 residue ribosomal protein fusion product 1, protein consisting of ubiquitin at the N-terminus and ribosomal protein L40 at the C-terminus; the corresponding gene is upregulated in colon cancer but not in gastric cancer                                                |
| SW:RL24_HUMAN P38663 homo sapiens (human), rattus norvegicus (rat), and bos taurus (bovine). 60s ribosomal protein l24 (l30). 5/2000 [MASS=17779]/Ribosomal protein L24, a putative component of the 60S ribosomal subunit                                                                                                                                                                                                                       |
| SW:DDX6_HUMAN P26196 homo sapiens (human), probable atp-dependent rna helicase p54 (oncogene rck) (dead box protein 6). 7/1998 [MASS=54418]/DEAD box protein 6, a member of the DEAD/H box ATP-dependent RNA helicase protein family, may be involved in cell proliferation, upregulated in colorectal adenocarcinoma and colonic adenoma; gene is translocated in a diffuse large B-cell lymphoma                                               |
| SW:RS16_HUMAN P17008 homo sapiens (human), and rattus norvegicus (rat). 40s ribosomal protein s16. 7/1999 [MASS=16314]/Ribosomal protein S16, putative component of the small 40S ribosomal subunit                                                                                                                                                                                                                                              |
| SW:RS20_HUMAN P17075 homo sapiens (human), and rattus norvegicus (rat). 40s ribosomal protein s20. 5/2000 [MASS=13373]/Ribosomal protein S20, a putative component of the small 40S ribosomal subunit, may play a role in apoptosis                                                                                                                                                                                                              |
| SW:RS2_HUMAN P15880 homo sapiens (human). 40s ribosomal protein s2 (s4) (llep3 protein). 10/1996 [MASS=31324]/Ribosomal protein S2, a putative component of the small 40S ribosomal subunit, may bind RNA, upregulated in squamous cell carcinoma and in breast and colon tumors                                                                                                                                                                 |
| SW:IF4E_HUMAN P06730 homo sapiens (human), eukaryotic translation initiation factor 4e (eif-4e) (eif4e) (mna cap-binding protein) (eif-4f 25 kda subunit). 5/2000 [MASS=25097]/Eukaryotic translation initiation factor 4E, a subunit of eIF4F, a mRNA cap-binding protein involved in translation initiation, a target of insulin dependent signaling pathway, expression is upregulated in breast carcinomas                                   |
|                                                                                                                                                                                                                                                                                                                                                                                                                                                  |
| SW:IMB3_HUMAN O00410 homo sapiens (human). importin beta-3 subunit (karyopherin beta-3 subunit) (ran-binding protein 5). 12/1998 [MASS=123630]/Karyopherin beta 3, a subunit of the nuclear localization signal receptor complex and plays a role in nuclear import of ribosomal proteins; inhibited by interaction with hepatitis C virus nonstructural protein 5A                                                                              |
| SW:IMA1_HUMAN P52294 homo sapiens (human). importin alpha-1 subunit (karyopherin alpha-1 subunit) (srp1-beta) (rag cohort protein 2) (nucleoprotein interactor 1) (npi-1). 12/1998 [MASS=60307]/Karyopherin alpha (importin alpha), a subunit of the nuclear localization sequence (NLS) receptor complex that binds to and mediates the nuclear import of RAG1 and STAT1                                                                        |
| Solute carrier family 9 isoform 3 regulatory factor 1 (sodium-hydrogen exchanger-regulatory factor), a cytoskeleton-linking protein that forms multiprotein complexes with members of the Ezrin-Radixin-Moesin family via two PDZ domains                                                                                                                                                                                                        |
| SW:LDLR_HUMAN P01130 homo sapiens (human). low-density lipoprotein receptor precursor (ldl receptor). 5/2000 [MASS=95376]/Low density lipoprotein receptor, mediates uptake of low density lipoproteins, involved in lipid metabolism; gene variations are associated with familial hypercholesterolemia, hypertension, atherosclerosis, and coronary artery disease                                                                             |
| SW:IMB1_HUMAN Q14974 homo sapiens (human). importin beta-1 subunit (karyopherin beta-1 subunit) (nuclear factor p97) (importin 90). 12/1998 [MASS=97234]/Importin beta (karyopherin beta 1), a subunit of the NLS (nuclear localization signal) receptor complex, binds to the nuclear pore complex and mediates translocation of the importin alpha-NLS complex into the nucleus                                                                |
| SW:EZRI_HUMAN P15311 homo sapiens (human). ezrin (p81) (cytovillin) (villin-2). 12/1998 [MASS=69268]/Villin 2 (ezrin), a member of the band 4.1 superfamily, links the cytoskeleton to the plasma membrane and thereby regulates cell adhesion and cortical morphogenesis, may play a role in rheumatoid arthritis and retinal degeneration                                                                                                      |
| SW:CALX_HUMAN P27824 homo sapiens (human). calnexin precursor (major histocompatibility complex class i antigen-binding protein p88) (p90) (ip90). 11/1995 [MASS=67568]/Calnexin, a calcium and lectin binding protein that functions as a chaperone in the endoplasmic reticulum, involved in protein folding and secretion, mediates retention of misfolded proteins in the endoplasmic reticulum                                              |
| SW:ER53_HUMAN P49257 homo sapiens (human). ergic-53 protein precursor (er-golgi intermediate compartment 53 kda protein) (gp58) (mr60) (lectin, mannose-binding 1). 7/1998 [MASS=57563]/Mannose-binding lectin 1, involved in the traffic of glycoproteins between endoplasmic reticulum and the Golgi apparatus; mutations of the corresponding gene is associated with combined factor V and VIII coagulation deficiency                       |
| SW:MPRI_HUMAN P11717 homo sapiens (human). cation-independent mannose-6-phosphate receptor precursor (ci man-6-p receptor) (ci-mpr) (insulin-like growth factor ii receptor) (300 kda mannose 6-phosphate [MASS=274309]/Insulin-like growth factor II receptor, functions in transport of mannose 6-phosphate-containing lysosomal enzymes and IGF-II maturation and clearance, mediates granzyme B-induced apoptosis, putative tumor suppressor |

|                                                                                                                                                                                                                                                                                                                                                                                                                                    |
|------------------------------------------------------------------------------------------------------------------------------------------------------------------------------------------------------------------------------------------------------------------------------------------------------------------------------------------------------------------------------------------------------------------------------------|
| SW:VPP1_HUMAN Q93050 homo sapiens (human). clathrin-coated vesicle/synaptic vesicle proton pump 116 kda subunit (ec 3.6.1.34) (vacuolar proton pump subunit 1). 12/1998 [MASS=95751]/ATPase (H+ transporting lysosomal (vacuolar proton pump) noncatalytic accessory protein 1A (110/116 kDa), a component of a multisubunit enzyme which couples ATP hydrolysis to proton translocation                                           |
| GP:Y18206_1 Homo sapiens mRNA for protein phosphatase 1 (PPP1R6). [MASS=32559]/Protein phosphatase 1 regulatory 6, glycogen targeting subunit of protein phosphatase 1, functions in glycogen metabolism in muscle                                                                                                                                                                                                                 |
| GP:AB037819_1 Homo sapiens mRNA for KIAA1398 protein, partial cds; Start codon is not identified.. [MASS=170212]/Ribosome binding protein 1, a putative ribosome receptor, may play a role in protein biosynthesis, appears to be involved in cardiac development, may play a role in cardiac remodeling in heart failure                                                                                                          |
| GP:AF020797_1 Homo sapiens AP-mu chain family member mu1B (HSMU1B) mRNA, complete cds. [MASS=48108]/Adaptor-related protein complex 1 mu 2 subunit, involved in protein sorting                                                                                                                                                                                                                                                    |
| SW:MPRD_HUMAN P20645 homo sapiens (human). cation-dependent mannose-6-phosphate receptor precursor (cd man-6-p receptor) (cd-mpr) (46 kda mannose 6-phosphate receptor) (mpr 46). 5/2000 [MASS=30993]/Cation-dependent mannose-6-phosphate receptor, involved in intracellular sorting and transport of acid hydrolases, transports lysosomal enzymes                                                                              |
| GP:AF077032_1 Homo sapiens sec61 homolog mRNA, complete cds. [MASS=52480]/Sec61 alpha form 2, a protein with high similarity to S. cerevisiae Sec61p, which is a component of the Sec61p-Sss1p-Sbh1p complex involved in protein translocation into the endoplasmic reticulum, member of the SecY protein family of protein translocators                                                                                          |
| SW:IMB2_HUMAN Q92973 homo sapiens (human). importin beta-2 subunit (karyopherin beta-2 subunit) (transportin) (m9 region interaction protein) (mip). 5/2000 [MASS=101310]/Transportin (karyopherin beta 2), a component of the nuclear pore complex, mediates the import of HNRPA1 by binding the M9 nuclear localization sequence, also binds nuclear Ran GTP and nucleoporin Nup153; may mediate mRNA transport                  |
| SW:SR19_HUMAN P09132 homo sapiens (human). signal recognition particle 19 kda protein (srp19). 10/1996 [MASS=16156]/Signal recognition particle 19 kDa, a signal recognition particle subunit that binds to 7SL RNA and mediates SRP54 binding to the SRP RNA, may be involved in translocation of newly synthesized proteins across the membrane of the rough ER                                                                  |
| GP:AF195951_1 Homo sapiens signal recognition particle 68 mRNA, complete cds; SRP68; subunit of signal recognition particle. [MASS=70242]/Signal recognition particle 68kD, a component of the signal recognition particle complex involved in targeting nascent proteins to the ER; corresponding gene maps to a tumor suppression locus associated with breast, esophageal, and ovarian cancers                                  |
| SW:SR09_HUMAN P49458 homo sapiens (human). signal recognition particle 9 kda protein (srp9). 12/1998 [MASS=9981]/Signal recognition particle 9 kDa, a subunit of the signal recognition particle that forms the Alu RNA-binding protein and binds to Alu RNA with SRP14, involved in translocation of newly synthesized proteins across the membrane of the rough ER                                                               |
| SW:I13A_HUMAN Q9uhl8 homo sapiens (human), mus musculus (mouse), and rattus norvegicus (rat). mitochondrial import inner membrane translocase subunit tim13 a. 10/2001 [MASS=10458]/Translocase of the mitochondrial inner membrane 13, a mitochondrial translocase subunit that oligomerizes with DDP1 (human TIMM8A) and mediates the translocation of the Tim23 (human TIM23) precursor across the outer mitochondrial membrane |
| SW:ROM_HUMAN P52272 homo sapiens (human). heterogeneous nuclear ribonucleoprotein m (hnrm m). 10/1996 [MASS=77469]/Heterogeneous nuclear ribonucleoprotein M, initiates recycling of internalized immature thyroglobulin for further processing through the Golgi back to the apical membrane                                                                                                                                      |
| SW:CAS_HUMAN P55060 homo sapiens (human). cellular apoptosis susceptibility protein. 11/1997 [MASS=110314]/CSE1 chromosome segregation 1-like (yeast), importin-alpha nuclear export receptor, functions in toxin and TNF resistance and apoptosis, may regulate cell proliferation; corresponding gene is amplified in breast and colon carcinoma cell lines                                                                      |
| SW:PKBS_HUMAN P30536 homo sapiens (human). peripheral-type benzodiazepine receptor (pbr) (pkbs) (mitochondrial benzodiazepine receptor). 6/1994 [MASS=18779]/Benzodiazepine receptor (peripheral), involved in steroid biosynthesis, cell proliferation, and may contribute to mitochondrial biogenesis and inhibit oxygen radical induced apoptosis; expression, nuclear location may correlate to breast tumor progression       |
| SW:PDF_HUMAN P40855 homo sapiens (human). peroxisomal farnesylated protein (33 kda housekeeping protein). 12/1998 [MASS=32807]/Peroxisomal farnesylated protein, peroxisomal protein that binds several peroxisomal membrane proteins (PMP), involved in early stages of PMP import and peroxisomal biogenesis; deficiency is associated with Zellweger syndrome complementation group J                                           |
| GP:U64791_1 Human Golgi membrane sialoglycoprotein MG160 (GLG1) mRNA, complete cds; fibroblast growth factor. [MASS=134593]/Golgi apparatus protein 1, a cysteine-rich membrane sialoglycoprotein that may be a receptor for fibroblast growth factor (FGF), may be involved in cell adhesion                                                                                                                                      |
| Human cysteine-rich fibroblast growth factor receptor (CFR-1) mRNA/Golgi apparatus protein 1, a cysteine-rich membrane sialoglycoprotein that may be a receptor for fibroblast growth factor (FGF), may be involved in cell adhesion                                                                                                                                                                                               |
| mitochondrial import inner membrane translocase subunit tim8 b (deafness dystonia protein 2)/Translocase of inner mitochondrial membrane 8 (yeast) homolog A, member of a family of small zinc finger proteins, involved in mitochondrial protein import, may be involved in neurogenesis or X-inactivation; gene mutations cause Mohr Tranebjaerg syndrome                                                                        |

|                                                                                                                                                                                                                                                                                                                                                                                                                                                                             |
|-----------------------------------------------------------------------------------------------------------------------------------------------------------------------------------------------------------------------------------------------------------------------------------------------------------------------------------------------------------------------------------------------------------------------------------------------------------------------------|
| SW:SR14_HUMAN P37108 homo sapiens (human). signal recognition particle 14 kda protein (srp14) (18 kda alu ma binding protein). 5/2000 [MASS=14544]/Signal recognition particle 14 kDa, heterodimer with SRP9 binds Alu-like RNAs, involved in the translocation of newly synthesized proteins across the rough endoplasmic reticulum membrane, may regulate expression and Alu transcript metabolism                                                                        |
| SW:SYTC_HUMAN P26639 homo sapiens (human). threonyl-trna synthetase, cytoplasmic (ec 6.1.1.3) (threonine--trna ligase) (thtrs). 6/1994 [MASS=82124]/Threonyl-tRNA synthetase, a class II aminoacyl tRNA synthetase which aminoacylates its cognate tRNAs with threonine for protein synthesis, autoantigen in several autoimmune disorders                                                                                                                                  |
| SW:SYG_HUMAN P41250 homo sapiens (human). glycyl-trna synthetase (ec 6.1.1.14) (glycine--trna ligase) (glytrs). 10/1996 [MASS=77531]/Glycyl-tRNA synthetase; functions in protein biosynthesis, aminoacylates its cognate tRNAs with phenylalanine/Glycyl-tRNA synthetase, a class II aminoacyl-tRNA synthetase that catalyzes aminoacylation of its cognate tRNA with glycine for protein biosynthesis; an autoantigen in dermatomyositis                                  |
| SW:SYD_HUMAN P14868 homo sapiens (human). aspartyl-trna synthetase (ec 6.1.1.12) (aspartate--trna ligase) (asprs). 11/1997 [MASS=57192]/Aspartyl-tRNA synthetase, a class II aminoacyl tRNA synthetase that aminoacylates its cognate tRNA with aspartate for protein biosynthesis, associates with a multisynthetase complex, N-terminus may aid interaction with elongation factor 1 alpha                                                                                |
| SW:SYA_HUMAN P49588 homo sapiens (human). alanyl-trna synthetase (ec 6.1.1.7) (alanine--trna ligase) (alars). 7/1998 [MASS=106801]/Alanyl-tRNA synthetase, aminoacylates its cognate tRNA with alanine for protein biosynthesis, acts as an autoantigen in patients with polymyositis                                                                                                                                                                                       |
| SW:SYR_HUMAN P54136 homo sapiens (human). arginyl-trna synthetase (ec 6.1.1.19) (arginine--trna ligase) (argrs). 5/2000 [MASS=74977]/Arginyl-tRNA synthetase, aminoacylates its cognate tRNAs with arginine for protein biosynthesis                                                                                                                                                                                                                                        |
| SW:SYM_HUMAN P56192 homo sapiens (human). methionyl-trna synthetase (ec 6.1.1.10) (methionine--trna ligase) (metrs). 12/1998 [MASS=101129]/Methionine-tRNA synthetase, putative tRNA synthetase that is predicted to aminoacylate its cognate tRNAs with methionine for protein biosynthesis, required for rRNA synthesis in the nucleolus                                                                                                                                  |
| SW:SYEP_HUMAN P07814 homo sapiens (human). multifunctional aminoacyl-trna synthetase [includes: glutamyl-trna synthetase (ec 6.1.1.17) (glutamate--trna ligase); prolyl-trna synthetase (ec 6.1.1.15) (pro [MASS=163026]/Glutamyl-prolyl-tRNA synthetase, a bifunctional enzyme with two functionally separable domains, one that aminoacylates prolyl-tRNA with proline and another that is believed to aminoacylate glutamyl-tRNA with glutamate for protein biosynthesis |
| SW:CST1_HUMAN Q05048 homo sapiens (human). cleavage stimulation factor, 50 kda subunit (cstf 50 kda subunit) (cf-1 50 kda subunit). 7/1998 [MASS=48358]/Cleavage stimulation factor subunit 1, the 50 kDa subunit of the cleavage stimulation factor complex required for pre-mRNA polyadenylation and 3'-end cleavage, interacts with BARD1 and the C-terminal domain of the RNA polymerase II large subunit                                                               |
| SW:SYQ_HUMAN P47897 homo sapiens (human). glutaminyl-trna synthetase (ec 6.1.1.18) (glutamine--trna ligase) (glnrs). 5/2000 [MASS=87799]/Glutamyl-tRNA synthetase, aminoacylates cognate tRNAs with glutamine for protein biosynthesis, also suppresses FAS (TNFRSF6)-mediated apoptosis by inhibiting ASK1 (MAP3K5) kinase activity, contains N-terminal appended and C-terminal catalytic domains                                                                         |
| SW:SYV_HUMAN P26640 homo sapiens (human). valyl-trna synthetase (ec 6.1.1.9) (valine--trna ligase) (valrs). 2/1996 [MASS=140377]/Valyl-tRNA synthetase 2, a putative class I tRNA sythetase, predicted to function in aminoacylation of valyl tRNAs for protein biosynthesis                                                                                                                                                                                                |
| SW:SYK_HUMAN Q15046 homo sapiens (human). lysyl-trna synthetase (ec 6.1.1.6) (lysine--trna ligase) (lysrs) (kiaa0070). 7/1998 [MASS=68034]/Lysyl-tRNA synthetase, a class II aminoacyl tRNA synthetase, aminoacylates its cognate tRNAs with lysine for protein biosynthesis, packaged into HIV virions, exists as cytoplasmic and mitochondrial alternative forms                                                                                                          |
| SW:SYI_HUMAN P41252 homo sapiens (human). isoleucyl-trna synthetase, cytoplasmic (ec 6.1.1.5) (isoleucine--trna ligase) (ilers) (irs). 7/1999 [MASS=144959]/Isoleucine-tRNA synthetase, a class I aminoacyl tRNA synthetase, aminoacylates isoleucyl-tRNA with isoleucine for protein biosynthesis, acts as an autoantigen in some autoimmune diseases                                                                                                                      |
| SW:NPM_HUMAN P06748 homo sapiens (human). nucleophosmin (npm) (nucleolar phosphoprotein b23) (numatrin) (nucleolar protein no38). 5/2000 [MASS=32575]/Nucleophosmin (numatrin), a nucleic acid-binding phosphoprotein involved in apoptosis, abundant in tumor cells; gene fusion with anaplastic lymphoma kinase (ALK) is detected in non-Hodgkin's lymphoma and fusion with MLF1 is seen in acute myeloid leukemia                                                        |
| SW:PCB1_HUMAN Q15365 homo sapiens (human). poly(rc)-binding protein 1 (hnrnp-e1) (nucleic acid binding protein sub2.3) (alpha-cp1). 5/2000 [MASS=37526]/Poly(rC)-binding protein 1, contains KH RNA-binding domains, binds poly(rC) RNA, acts as a translational repressor and plays a role in mRNA stability                                                                                                                                                               |
| SWN:SYFB_HUMAN Q9nsd9 homo sapiens (human). phenylalanyl-trna synthetase beta chain (ec 6.1.1.20) (phenylalanine--trna ligase beta chain) (phers) (protein hspc173). 8/2001 [MASS=66130]/Phenylalanyl-tRNA synthetase beta-subunit, regulatory subunit that forms heterodimers with the catalytic alpha subunit (FARSL), involved in protein synthesis, may play a role in tumorigenic events                                                                               |
| GP:AB020880_1 Homo sapiens mRNA for squamous cell carcinoma antigen SART-3, complete cds; squamous cell carcinoma antigen recognized by T cells. [MASS=109935]/Squamous cell carcinoma antigen recognized by T-cells 3, a snRNA binding protein that functions in spliceosome reassembly, acts as a tumor antigen recognized by cytotoxic T lymphocytes, may be a target for immunotherapy in a number of cancers                                                           |

|                                                                                                                                                                                                                                                                                                                                                                                                                                                                           |
|---------------------------------------------------------------------------------------------------------------------------------------------------------------------------------------------------------------------------------------------------------------------------------------------------------------------------------------------------------------------------------------------------------------------------------------------------------------------------|
| SW:ROF_HUMAN P52597 homo sapiens (human). heterogeneous nuclear ribonucleoprotein f (hnrfp f). 11/1997 [MASS=45672]/Heterogeneous nuclear ribonucleoprotein F, an RNA binding protein which contains quasi-RRMs (RNA recognition motifs) and plays a role in pre-mRNA splicing                                                                                                                                                                                            |
| PIR2:T13159 E1B-55kDa-associated protein - human [MASS=95810]/E1B-55kDa-associated protein 5, a heterogeneous nuclear ribonucleoprotein involved in nucleocytoplasmic transport of adenovirus and cellular mRNAs, binds adenovirus early 1B (E1B-55 kD) protein and may regulate viral oncogenic transformation                                                                                                                                                           |
| SW:SYN_HUMAN O43776 homo sapiens (human). asparaginyl-trna synthetase, cytoplasmic (ec 6.1.1.22) (asparagine-- trna ligase) (asnr). 5/2000 [MASS=62943]/Asparaginyl-tRNA synthetase, a class II aminoacyl tRNA synthetase, aminoacylates its cognate tRNAs with asparagine for protein biosynthesis, acts as an autoantigen in patients with inflammatory myopathy in interstitial lung disease                                                                           |
| no_description_avail/Heterogeneous nuclear ribonucleoprotein R, a putative pre-mRNA processing protein that contains three RNA recognition domains and an RGG domain, interacts with survival motor neuron protein and is an autoantigen in autoimmune disease                                                                                                                                                                                                            |
| GP:AF037448_1 Homo sapiens RRM RNA binding protein Gry-rbp (GRY-RBP) mRNA, complete cds; RRM RNA binding protein; Glycine, arginine and tyrosine-rich at C-terminus. [MASS=69633]/NS1 associated protein 1, component of the ApoB mRNA editosome involved in apolipoprotein B (APOB) mRNA editing, may bind RNA, may play a role in the regulation of mRNA splicing or transport from the nucleus                                                                         |
| SW:ROK_HUMAN Q07244 homo sapiens (human), and rattus norvegicus (rat). heterogeneous nuclear ribonucleoprotein k (hnrfp k) (dc-stretch binding protein) (csbp) (transformation upregulated nuclear protein [MASS=50976]/Heterogeneous nuclear ribonucleoprotein K, a transcription factor which binds to poly(C) of RNA and DNA and is involved in RNA processing, gene transcription and translational controls, may induce apoptosis and play a role in viral infection |
| SW:FBRL_HUMAN P22087 homo sapiens (human). fibrillarin (34 kda nucleolar scleroderma antigen). 7/1999 [MASS=33818]/Fibrillarin, a nucleolar RNA-binding protein that is involved in ribosomal RNA processing; recognized by antisera from patients with scleroderma autoimmune disease, systemic sclerosis, and other connective tissue diseases                                                                                                                          |
| SW:SMD3_HUMAN P43331 homo sapiens (human). small nuclear ribonucleoprotein sm d3 (snrnp core protein d3) (sm-d3). 10/1996 [MASS=13916]/Small nuclear ribonucleoprotein D3, part of a multimeric complex involved in biogenesis of snRNPs and mRNA splicing, interacts with the spinal muscular atrophy disease protein (SMN); autoantigen for antibodies associated with systemic lupus erythematosus                                                                     |
| SW:ROAO_HUMAN Q13151 homo sapiens (human). heterogeneous nuclear ribonucleoprotein a0 (hnrfp a0). 5/2000 [MASS=30841]/Heterogeneous nuclear ribonucleoprotein A0, has triplet repeats, two consensus sequence-type RNA-binding domains, and a glycine-rich auxiliary domain, found in low abundance hnRNP complexes                                                                                                                                                       |
| SW:ROH1_HUMAN P31943 homo sapiens (human). heterogeneous nuclear ribonucleoprotein h (hnrfp h). 11/1997 [MASS=49229]/Heterogeneous nuclear ribonucleoprotein H1, a pre-mRNA splicing factor that is a component of a complex that mediates post-transcriptional processing of primary transcripts                                                                                                                                                                         |
| SW:DDX1_HUMAN Q92499 homo sapiens (human). dead box protein 1 (dead box protein-retinoblastoma) (dbp-rb). 5/2000 [MASS=82432]/DEAD box protein 1, a member of the DEAD-H box ATP-dependent RNA helicase protein family, plays a role in the processing of pre-mRNAs, may interact with CSTF2; corresponding gene is coamplified with MYC in some neuroblastoma and retinoblastoma cell lines                                                                              |
| PIR2:JW0079 heterogeneous nuclear ribonucleoprotein homolog JKTBP [imported] - human [MASS=33589]/Heterogeneous nuclear ribonucleoprotein D-like, an RNA- and DNA-binding protein that may play a role in mRNA biogenesis                                                                                                                                                                                                                                                 |
| SW:PCB2_HUMAN Q15366 homo sapiens (human). poly(rc)-binding protein 2 (hnrfp-e2). 5/2000 [MASS=38580]/Poly(rc)-binding protein 2, poly(rc) and poly(U)-binding protein, involved in the translational regulation of poliovirus, papillomavirus, and hepatitis C virus transcripts                                                                                                                                                                                         |
| GP:AC003972_1 Homo sapiens DNA from chromosome 19, cosmid R33485 containing pNORF1, complete sequence; human type 1 RNA helicase; DPS similarity to (U59323) type 1 RNA helicase pNORF1 [Homo sapiens]; Score. [MASS=123036]/regulator of nonsense transcripts 1 (nonsense mrna reducing factor 1) (norf1) (up-frameshift suppressor 1 homolog). 10/2001 [MASS=124345]                                                                                                    |
| SW:RUXF_HUMAN Q15356 homo sapiens (human). small nuclear ribonucleoprotein f (snrnp-f) (sm protein f). 7/1999 [MASS=9725]/Sm protein F, a spliceosomal snRNA-associated Sm core protein that is involved in the biogenesis of the snRNPs; a target of autoantibodies in patients with the autoimmune disease systemic lupus erythematosus                                                                                                                                 |
| GP:AF177344_1 Homo sapiens clone HC90 unknown mRNA. [MASS=30998]/ weakly similar to a methyltransferase/Member of the RNA methyltransferase family, which catalyze 2'-O-methylation of ribose groups in R                                                                                                                                                                                                                                                                 |
| PIR2:I55595 splicing factor - human [MASS=58657]/Splicing factor CC1.3, a novel nuclear protein and putative member of the SR family of alternative splicing factors; target of autoantibodies from a patient with hepatocellular carcinoma                                                                                                                                                                                                                               |
| SW:ROA3_HUMAN P51991 homo sapiens (human). heterogeneous nuclear ribonucleoprotein a3 (hnrfp a3) (fbrmp) (d10s102). 7/1999 [MASS=39686]/Protein with similarity to heterogeneous ribonucleoproteins, contains RRM (RNA recognition motif) domains                                                                                                                                                                                                                         |
| SW:SMD2_HUMAN P43330 homo sapiens (human). small nuclear ribonucleoprotein sm d2 (snrnp core protein d2) (sm-d2). 10/1996 [MASS=13527]/Small nuclear ribonucleoprotein D2 polypeptide, one of seven common core snRNP proteins involved in snRNP biogenesis and pre-mRNA splicing, autoantigen for anti-Sm antibodies produced by individuals with systemic lupus erythematosus                                                                                           |

|                                                                                                                                                                                                                                                                                                                                                                                                                                                            |
|------------------------------------------------------------------------------------------------------------------------------------------------------------------------------------------------------------------------------------------------------------------------------------------------------------------------------------------------------------------------------------------------------------------------------------------------------------|
| SW:U2AF_HUMAN P26368 homo sapiens (human). splicing factor u2af 65 kda subunit (u2 auxiliary factor 65 kda subunit) (u2 snrnp auxiliary factor large subunit). 12/1998 [MASS=53501]/U2 small nuclear ribonucleoprotein auxiliary factor (65 kDa), a component of U2 small nucleoprotein auxiliary factor, which is necessary for mRNA splicing, binds to pre-mRNA                                                                                          |
| GP:D21163_1 Human mRNA for KIAA0031 gene, complete cds; similar to human elongation factor 2 mRNA (HSEF2).. [MASS=109436]/U5 snRNP-specific protein 116 kD, a spliceosome component with GTPase activity, plays a role in mRNA splicing and processing                                                                                                                                                                                                     |
| SW:RU17_HUMAN P08621 homo sapiens (human). u1 small nuclear ribonucleoprotein 70 kda (u1 snrnp 70 kda) (snrp70). 11/1995 [MASS=70081]/U1 small nuclear 70 kDa ribonucleoprotein, involved in pre mRNA splicing, acts as an autoantigen in systemic lupus erythematosus and mixed connective tissue disease                                                                                                                                                 |
| PIR2:A54601 RNA-binding protein AUF1 - human [MASS=31200]/Heterogeneous nuclear ribonucleoprotein D (AU-rich element RNA-binding protein 1 37kD), an RNA and DNA-binding protein which binds to AU-rich elements in the 3' untranslated regions of mRNAs and mediates their degradation                                                                                                                                                                    |
| SW:NHPX_HUMAN P55769 homo sapiens (human). nhp2/rs6 family protein yel026w homolog (high mobility group-like nuclear protein 2 homolog) (otk27). 5/2000 [MASS=14174]/Non-histone chromosome protein 2 (S. cerevisiae)-like 1, a member of a family of RNP-associated proteins, a component of the spliceosome and rRNA processing machinery, recognizes a shared stem-internal loop-stem structure in its RNA targets                                      |
| SW:DDX5_HUMAN P17844 homo sapiens (human). probable rna-dependent helicase p68 (dead-box protein p68) (dead box protein 5). 7/1998 [MASS=69148]/DEAD/H (Asp-Glu-Ala-Asp/His) box polypeptide 5 (RNA helicase 68kD), a ATP-dependent RNA helicase that has ATP-independent RNA renaturation activity and catalyses branch migration, binds estrogen receptor alpha and function as a transcriptional coactivator                                            |
| SW:U2AG_HUMAN Q01081 homo sapiens (human). splicing factor u2af 35 kda subunit (u2 auxiliary factor 35 kda subunit) (u2 snrnp auxiliary factor small subunit). 12/1998 [MASS=27872]/U2(RNU2) small nuclear RNA auxiliary factor 1, functions as a pre-mRNA splicing protein, involved in the functional recognition of the 3' splice site AG dinucleotide, interacts with ZNF265 protein involved in alternative splicing                                  |
| SW:ROU_HUMAN Q00839 homo sapiens (human). heterogenous nuclear ribonucleoprotein u (hnmp u) (scaffold attachment factor a) (saf-a). 5/2000 [MASS=90479]/Heterogeneous nuclear ribonucleoprotein U (scaffold attachment factor A), binds RNA, binds EP300 in a complex that binds scaffold-matrix attachment regions of TOP1, involved in chromatin structure, apoptosis, and perhaps RNA processing and transcription                                      |
| SW:ROA1_HUMAN P09651 homo sapiens (human). heterogeneous nuclear ribonucleoprotein a1 (helix-destabilizing protein) (single-strand binding protein) (hnmp core protein a1). 11/1997 [MASS=38715]/Heterogeneous nuclear ribonucleoprotein A1, an RNA-binding protein involved in mRNA splicing and translational control, undergoes nucleocytoplasmic shuttling possibly for mRNA export and telomerase recruitment; an autoantigen in autoimmune disorders |
| SW:DD17_HUMAN Q92841 homo sapiens (human). probable rna-dependent helicase p72 (dead-box protein p72) (dead box protein 17). 5/2000 [MASS=72371]/DEAD H box protein 17, a member of the DEAD box family of RNA-dependent ATPases and ATP-dependent RNA helicases, a component of an estrogen receptor alpha (ESR) transcriptional coactivator complex                                                                                                      |
| SW:Y017_HUMAN Q15393 homo sapiens (human). hypothetical protein kiaa0017. 5/2000 [MASS=44606]/ Homo sapiens mRNA for SAP 130 spliceosomal protein/Splicing factor 3b subunit 3, a component of the U2 snRNP-associated protein complex SF3b that plays a role in spliceosome assembly, interacts with STAGA and TFTC complexes implicated in DNA repair, chromatin modification, and transcription                                                         |
| SW:NR54_HUMAN Q15233 homo sapiens (human). 54 kda nuclear rna-binding protein (p54(nrb)) (p54nrb) (55 kda nuclear protein) (nmt55). 5/2000 [MASS=54232]/Non-POU-domain-containing octamer-binding nuclear protein, binds DNA and RNA, and implicated in transcription and pre-mRNA splicing; a fusion partner with TFE3 in papillary renal cell carcinoma                                                                                                  |
| SW:SFR7_HUMAN Q16629 homo sapiens (human). splicing factor, arginine/serine-rich 7 (splicing factor 9g8). 5/2000 [MASS=27367]/Splicing factor arginine serine rich 7, a splicing factor of the SR protein family containing an RNA binding domain (RBD) and a serine/arginine (SR) domain that is implicated in alternative pre-mRNA splicing                                                                                                              |
| GP:AF037448_1 Homo sapiens RRM RNA binding protein Gry-rbp (GRY-RBP) mRNA, complete cds; RRM RNA binding protein; Glycine, arginine and tyrosine-rich at C-terminus. [MASS=69633]/NS1 associated protein 1, component of the ApoB mRNA editosome involved in apolipoprotein B (APOB) mRNA editing, may bind RNA, may play a role in the regulation of mRNA splicing or transport from the nucleus                                                          |
| SW:SMD3_HUMAN P43331 homo sapiens (human). small nuclear ribonucleoprotein sm d3 (snrnp core protein d3) (sm-d3). 10/1996 [MASS=13916]/Small nuclear ribonucleoprotein D3, part of a multimeric complex involved in biogenesis of snRNPs and mRNA splicing, interacts with the spinal muscular atrophy disease protein (SMN); autoantigen for antibodies associated with systemic lupus erythematosus                                                      |
| SW:RUXF_HUMAN Q15356 homo sapiens (human). small nuclear ribonucleoprotein f (snrnp-f) (sm protein f). 7/1999 [MASS=9725]/Sm protein F, a spliceosomal snRNA-associated Sm core protein that is involved in the biogenesis of the snRNPs; a target of autoantibodies in patients with the autoimmune disease systemic lupus erythematosus                                                                                                                  |

|                                                                                                                                                                                                                                                                                                                                                                                                                                                            |
|------------------------------------------------------------------------------------------------------------------------------------------------------------------------------------------------------------------------------------------------------------------------------------------------------------------------------------------------------------------------------------------------------------------------------------------------------------|
| PIR2:T09073 splicing factor Sip1 - human [MASS=128875]/Splicing factor arginine serine rich 2 interacting protein, a SR domain family protein that interacts with the RNA polymerase II C-terminal domain and several splicing factors, is essential in mRNA splicing and possibly spliceosome A-complex formation                                                                                                                                         |
| PIR2:I55595 splicing factor - human [MASS=58657]/Splicing factor CC1.3, a novel nuclear protein and putative member of the SR family of alternative splicing factors; target of autoantibodies from a patient with hepatocellular carcinoma                                                                                                                                                                                                                |
| SW:SMD2_HUMAN P43330 homo sapiens (human). small nuclear ribonucleoprotein sm d2 (snrnp core protein d2) (sm-d2). 10/1996 [MASS=13527]/Small nuclear ribonucleoprotein D2 polypeptide, one of seven common core snRNP proteins involved in snRNP biogenesis and pre-mRNA splicing, autoantigen for anti-Sm antibodies produced by individuals with systemic lupus erythematosus                                                                            |
| SW:U2AF_HUMAN P26368 homo sapiens (human). splicing factor u2af 65 kda subunit (u2 auxiliary factor 65 kda subunit) (u2 snrnp auxiliary factor large subunit). 12/1998 [MASS=53501]/U2 small nuclear ribonucleoprotein auxiliary factor (65 kDa), a component of U2 small nucleoprotein auxiliary factor, which is necessary for mRNA splicing, binds to pre-mRNA                                                                                          |
| GP:D21163_1 Human mRNA for KIAA0031 gene, complete cds; similar to human elongation factor 2 mRNA (HSEF2). [MASS=109436]/U5 snRNP-specific protein 116 kD, a spliceosome component with GTPase activity, plays a role in mRNA splicing and processing                                                                                                                                                                                                      |
| SW:RU17_HUMAN P08621 homo sapiens (human). u1 small nuclear ribonucleoprotein 70 kda (u1 snrnp 70 kda) (snrp70). 11/1995 [MASS=70081]/U1 small nuclear 70 kDa ribonucleoprotein, involved in pre mRNA splicing, acts as an autoantigen in systemic lupus erythematosus and mixed connective tissue disease                                                                                                                                                 |
| SW:U2AG_HUMAN Q01081 homo sapiens (human). splicing factor u2af 35 kda subunit (u2 auxiliary factor 35 kda subunit) (u2 snrnp auxiliary factor small subunit). 12/1998 [MASS=27872]/U2(RNU2) small nuclear RNA auxiliary factor 1, functions as a pre mRNA splicing protein, involved in the functional recognition of the 3' splice site AG dinucleotide, interacts with ZNF265 protein involved in alternative splicing                                  |
| SW:ROA1_HUMAN P09651 homo sapiens (human). heterogeneous nuclear ribonucleoprotein a1 (helix-destabilizing protein) (single-strand binding protein) (hnmp core protein a1). 11/1997 [MASS=38715]/Heterogeneous nuclear ribonucleoprotein A1, an RNA-binding protein involved in mRNA splicing and translational control, undergoes nucleocytoplasmic shuttling possibly for mRNA export and telomerase recruitment; an autoantigen in autoimmune disorders |
| SW:Y017_HUMAN Q15393 homo sapiens (human). hypothetical protein kiaa0017. 5/2000 [MASS=44606]/ Homo sapiens mRNA for SAP 130 spliceosomal protein/Splicing factor 3b subunit 3, a component of the U2 snRNP-associated protein complex SF3b that plays a role in spliceosome assembly, interacts with STAGA and TFTC complexes implicated in DNA repair, chromatin modification, and transcription                                                         |
| SW:NR54_HUMAN Q15233 homo sapiens (human). 54 kda nuclear rna-binding protein (p54(nrb)) (p54nrb) (55 kda nuclear protein) (nmt55). 5/2000 [MASS=54232]/Non-POU-domain-containing octamer-binding nuclear protein, binds DNA and RNA, and implicated in transcription and pre-mRNA splicing; a fusion partner with TFE3 in papillary renal cell carcinoma                                                                                                  |
| SW:SFR7_HUMAN Q16629 homo sapiens (human). splicing factor, arginine/serine-rich 7 (splicing factor 9g8). 5/2000 [MASS=27367]/Splicing factor arginine serine rich 7, a splicing factor of the SR protein family containing an RNA binding domain (RBD) and a serine/arginine (SR) domain that is implicated in alternative pre-mRNA splicing                                                                                                              |
| SW:HS71_HUMAN P08107 homo sapiens (human). heat shock 70 kda protein 1 (hsp70.1) (hsp70-1/hsp70-2). 5/2000 [MASS=70052]/Heat shock 70 kDa protein 1A, a member of the HSP70 chaperone family involved in protein folding, translocation, and complex assembly, blocks AU-rich mRNA decay by nuclear sequestering of AU-rich binding protein, may contribute to celiac disease                                                                              |
| SW:RIN1_HUMAN P13489 homo sapiens (human). placental ribonuclease inhibitor (ribonuclease/angiogenin inhibitor) (rai) (ri). 12/1998 [MASS=49842]/Ribonuclease and angiogenin inhibitor, tightly binds and inhibits alkaline and neutral ribonucleases and angiogenin, functions in mRNA degradation and inhibition of HT-29 human colon adenocarcinoma cell binding to angiogenin (ANG)                                                                    |
| GP:AF132941_1 Homo sapiens CGI-07 protein mRNA, complete cds. [MASS=57585]/Protein with moderate similarity to S. cerevisiae Nmd3p, which is a protein involved in the nuclear export of 60S ribosomal subunits                                                                                                                                                                                                                                            |
| PIR2:A57017 RNase L inhibitor - human [MASS=67559]/Ribonuclease L inhibitor, inhibits the nuclease activity and 2-5A binding ability of RNase L, may be induced by HIV-1 to inhibit the 2-5A/RNase L pathway, can inhibit the antiviral activity of interferon when overexpressed                                                                                                                                                                          |
| SW:PAB1_HUMAN P11940 homo sapiens (human). polyadenylate-binding protein 1 (poly(a) binding protein 1) (pabp 1). 7/1998 [MASS=70671]/Poly(A)-binding protein cytoplasmic 1, binds to poly(A) tails of mRNA and plays roles in regulating mRNA stability and translation, also implicated in mRNA transport from the nucleus to the cytoplasm                                                                                                               |
| GP:U85625_1 Homo sapiens ribonuclease 6 precursor, mRNA, complete cds. [MASS=29481]/Ribonuclease 6 precursor, a putative ribonuclease that plays a role in the negative regulation of proliferation, may be involved in senescence, may be a class II tumor suppressor, downregulated in ovarian cancer and in ovarian cancer cell lines                                                                                                                   |

|                                                                                                                                                                                                                                                                                                                                                                                                                                                                                                                                                                                                                                                                                   |
|-----------------------------------------------------------------------------------------------------------------------------------------------------------------------------------------------------------------------------------------------------------------------------------------------------------------------------------------------------------------------------------------------------------------------------------------------------------------------------------------------------------------------------------------------------------------------------------------------------------------------------------------------------------------------------------|
| <p>GP:AC003972_1 Homo sapiens DNA from chromosome 19, cosmid R33485 containing pNORF1, complete sequence; human type 1 RNA helicase; DPS similarity to (U59323) type 1 RNA helicase pNORF1 [Homo sapiens]; Score. [MASS=123036]/regulator of nonsense transcripts 1 (nonsense mrna reducing factor 1) (norf1) (up-frameshift suppressor 1 homolog). 10/2001 [MASS=124345]</p>                                                                                                                                                                                                                                                                                                     |
| <p>PIR2:S78046 ribonuclease 6 (EC 3.1.27.-) precursor - human [MASS=21941]/Ribonuclease k6, a ribonuclease of the ribonuclease A superfamily, possibly functions in host defense</p> <p>PIR2:A54601 RNA-binding protein AUF1 - human [MASS=31200]/Heterogeneous nuclear ribonucleoprotein D (AU-rich element RNA-binding protein 1 37kD), an RNA and DNA-binding protein which binds to AU-rich elements in the 3' untranslated regions of mRNAs and mediates their degradation</p>                                                                                                                                                                                               |
|                                                                                                                                                                                                                                                                                                                                                                                                                                                                                                                                                                                                                                                                                   |
| <p>SW:IMA1_HUMAN P52294 homo sapiens (human). importin alpha-1 subunit (karyopherin alpha-1 subunit) (srp1-beta) (rag cohort protein 2) (nucleoprotein interactor 1) (npi-1). 12/1998 [MASS=60307]/Karyopherin alpha (importin alpha), a subunit of the nuclear localization sequence (NLS) receptor complex that binds to and mediates the nuclear import of RAG1 and STAT1</p>                                                                                                                                                                                                                                                                                                  |
| <p>SW:FRAP_HUMAN P42345 homo sapiens (human). fkbp-rapamycin associated protein (frap) (rapamycin target protein). 7/1999 [MASS=288892]/FK506 binding protein 12-rapamycin associated protein 1, serine/threonine and 1-phosphatidylinositol 4-kinase, regulates translation, cell cycle and p53 (TP53) -dependent apoptosis; altered expression is associated with recurrent prostate tumors</p>                                                                                                                                                                                                                                                                                 |
| <p>PIR2:JE0334 nuclear matrix protein NMP 238 - human [MASS=50228]/RuvB like 1, a member of the TIP49 family of proteins, a nuclear protein which contains ATPase-helicase motifs, may interact with the transactivation domain of c-myc (MYC)</p>                                                                                                                                                                                                                                                                                                                                                                                                                                |
| <p>SW:HMG1_HUMAN P09429 homo sapiens (human). high mobility group protein hmg1 (hmg-1). 5/2000 [MASS=24763]/High-mobility group (nonhistone chromosomal) protein 1, induces DNA bending, binds damaged DNA, activates and represses transcription, involved in the DNA damage response and V(D)J recombination, may be a target for therapeutic intervention of sepsis</p>                                                                                                                                                                                                                                                                                                        |
| <p>SW:KU86_HUMAN P13010 h atp-dependent dna helicase ii, 80 kda subunit (lupus ku autoantigen protein p86) (ku86) (ku80) (86 kda subunit of ku antigen) (thyroid- lupus autoantigen) (tlaa) (ctc box binding [MASS=82573]/X-ray repair complementing defective repair in Chinese hamster cells 5, binds ds-DNA free ends, binds Ku70 (G22P1) to regulate DNA-PK, involved in DNA repair, V(D)J recombination, cell adhesion, and enzyme activation, may play a role in tumor progression</p>                                                                                                                                                                                      |
| <p>SW:RFA3_HUMAN P35244 homo sapiens (human). replication protein a 14 kda subunit (rp-a) (rf-a) (replication factor-a protein 3). 11/1997 [MASS=13569]/Replication protein A 3, a subunit of replication protein A, which is a single-stranded DNA-binding protein complex with roles in DNA replication, repair, and recombination</p> <p>PIR2:A57099 DNA-activated protein kinase, catalytic subunit - human [MASS=465428]/DNA-dependent protein kinase catalytic subunit, a DNA-binding protein kinase involved in DNA double-strand break repair and somatic recombination of antibody genes; absence of mouse Prkdc is associated with severe combined immunodeficiency</p> |
| <p>SW:RFA1_HUMAN P27694 homo sapiens (human). replication protein a 70 kda dna-binding subunit (rp-a) (rf-a) (replication factor-a protein 1) (single-stranded dna-binding protein). 11/1997 [MASS=68138]/Replication protein A1 (70 kDa), a DNA replication factor A subunit, has roles in DNA replication, recombination, repair, may contribute to latent virus reactivation, inactivated by anti-cancer drug adozelesin</p>                                                                                                                                                                                                                                                   |
|                                                                                                                                                                                                                                                                                                                                                                                                                                                                                                                                                                                                                                                                                   |
| <p>inhibitor of nuclear factor kappa b kinase beta subunit/Serine kinase that is a subunit of the I kappaB kinase (IKK) complex, phosphorylates I kappaB and activates NF-kappaB (RELA), activated by kinases NIK (MAP3K14) and MEKK1 (MAP3K1)</p>                                                                                                                                                                                                                                                                                                                                                                                                                                |
| <p>GP:U35146_1 Human p56 protein kinase (KKIAMRE), complete cds; similar to human p42 KKIALRE gene, GenBank Accession Number X66358; these protein kinases have mutually exclusive expression in testis (p56 KKIAMRE) and ovary (p42 KKIALRE). [MASS=56019]/Cyclin-dependent kinase-like 2, putative protein kinase whose activity is stimulated by epidermal growth factor (EGF), may play a role in sex differentiation</p>                                                                                                                                                                                                                                                     |
| <p>SW:FKB5_HUMAN Q13451 homo sapiens 51 kda fk506-binding protein (fkbp51) (peptidyl-prolyl cis-trans isomerase) (ec 5.2.1.8) (ppase) (rotamase) (54 kda progesterone receptor-associated immunophilin) (fkb [MASS=51212]/FK506-binding protein 5, a peptidylprolyl cis-trans isomerase and member of the immunophilin family of FK506-binding proteins, forms a progesterone receptor complex with Hsp90 and p23, serves as a chaperone and mediates inhibition of calcineurin</p>                                                                                                                                                                                               |
| <p>SW:143E_HUMAN P42655 homo sapiens (human), mus musculus (mouse), rattus norvegicus (rat), bos taurus (bovine), and ovis aries 14-3-3 protein epsilon (mitochondrial import stimulation factor I subunit) ( [MASS=29174]/14-3-3 epsilon, may regulate the cell cycle by binding cdc25 phosphatases and linking cell cycle machinery with mitogenic signaling, binds DNA topoisomerase II alpha (TOP2A), prevents TOP2A binding of DNA and renders cells resistant to anticancer drugs</p>                                                                                                                                                                                       |



|                                                                                                                                                                                                                                                                                                                                                                                                                                                                                             |
|---------------------------------------------------------------------------------------------------------------------------------------------------------------------------------------------------------------------------------------------------------------------------------------------------------------------------------------------------------------------------------------------------------------------------------------------------------------------------------------------|
| <p>SW:RIN1_HUMAN Q13671 homo sapiens (human). ras interaction/interference protein 1 (ras inhibitor jc99) (fragment). 11/1997 [MASS=52857]/Ras inhibitor 1, inhibits Ras (HRAS) - mediated transformation and may be regulated by serine phosphorylation and 14-3-3 protein binding; augments BCR-ABL oncogenic activity and is amplified in some oral squamous cell carcinomas</p>                                                                                                         |
| <p>SW:TNRC_HUMAN P36941 homo sapiens (human). lymphotoxin-beta receptor precursor (tumor necrosis factor receptor 2 related protein) (tumor necrosis factor c receptor). 11/1997 [MASS=46709]/Lymphotoxin beta receptor, member of the tumor necrosis factor receptor family that specifically binds lymphotoxin-alpha/beta heterotrimer and mediates cytotoxic responses, may be involved in lymph gland development or organization</p>                                                   |
| <p>SWN:AKT3_HUMAN Q9y243 homo sapiens (human). rac-gamma serine/threonine protein kinase (ec 2.7.1.-) (rac-pk-gamma) (protein kinase akt-3) (protein kinase b, gamma) (pkb gamma). 8/2001 [MASS=55775]/Protein kinase B gamma, a serine/threonine protein kinase that is activated by growth factors and 3-phosphoinositide; insulin-induced activity is upregulated in estrogen receptor negative breast cancer and androgen insensitive prostate carcinoma</p>                            |
| <p>SW:RRAS_HUMAN P10301 homo sapiens (human). ras-related protein r-ras (p23). 11/1997 [MASS=23480]/Related RAS viral oncogene homolog, inhibits apoptosis through BCL2 or Bcl-xl (BCL2L1), mediates myoblast differentiation, acts as a downstream effector of GRF2 in the activation of JNK, enhances cell-matrix adhesion by modulating integrins</p>                                                                                                                                    |
| <p>SW:ATS1_HUMAN Q9uh8 homo sapiens (human). adam-ts 1 precursor (ec 3.4.24.-) (a disintegrin and metalloproteinase with thrombospondin motifs 1) (adamts-1) (adam-ts1) (meth-1). 5/2000 [MASS=103498]/A disintegrin metalloprotease with a thrombospondin type 1 motif 1, a putative heparin-binding metalloprotease that inhibits endothelial cell proliferation, involved in angiogenesis; mouse Adamts1 may play a role in the pathogenesis of cancer cachexia</p>                      |
| <p>SW:AAK1_HUMAN Q13131 homo sapiens (human). 5'-amp-activated protein kinase, catalytic alpha-1 chain (ec 2.7.1.-) (ampk alpha-1 chain) (fragment). 7/1999 [MASS=19837]/AMP-activated protein kinase (alpha 1 catalytic subunit), a metabolic sensor of AMP levels, may have roles in signal transduction, may regulate the cystic fibrosis transmembrane conductance regulator (CFTR)</p>                                                                                                 |
| <p>GP:AF061258_1 Homo sapiens LIM protein mRNA, complete cds. [MASS=64028]/ similar to rat protein kinase C-binding enigma/Enigma homolog, contains LIM domains, binds oncoprotein Ret and may bind protein kinase C, may mediate Ret mitogenic signaling</p>                                                                                                                                                                                                                               |
| <p>PIR2:JC4775 p58k protein - human [MASS=57580]/The 58,000-dalton cellular inhibitor of the interferon-induced double-stranded RNA-activated protein kinase (PKR) is a member of the tetratricopeptide repeat family of proteins/DnaJ (Hsp40) homolog subfamily C member 3 (protein kinase inhibitor p58), a member of the tetratricopeptide repeat family of proteins that may act as a cochaperone that inhibits the activity of double-stranded RNA-dependent protein kinase (PRKR)</p> |
| <p>SW:COF1_HUMAN P23528 homo sapiens (human). cofilin, non-muscle isoform. 11/1997 [MASS=18502]/Non-muscle cofilin, an actin-binding protein that assists translocation of actin from the cytoplasm to the nucleus; inactivation through phosphorylation by LIM-kinase leads to actin depolymerization</p>                                                                                                                                                                                  |
| <p>GP:AF100757_1 Homo sapiens COP9 complex subunit 4 mRNA, complete cds. [MASS=46198]/COP9 (constitutive photomorphogenic Arabidopsis homolog) subunit 4, a subunit of a complex related to the 26S proteasome regulatory complex, and possibly involved in regulating protein degradation</p>                                                                                                                                                                                              |
| <p>PIR2:T13151 adapter protein CMS - human [MASS=71451]/CMS: an adapter molecule involved in cytoskeletal rearrangements/CD2-associated protein, an adaptor that may play a role in kidney function and mediate cytoskeletal rearrangement; mouse Cd2ap is associated with congenital nephrotic syndrome and possibly Nail-Patella syndrome nephropathy and polycystic kidney disease</p>                                                                                                   |
| <p>GP:AF024636_1 Homo sapiens STE20-like kinase 3 (mst-3) mRNA, complete cds; protein serine/threonine kinase; similar to yeast STE20. [MASS=47941]/Serine-threonine kinase 24 (Ste20 yeast homolog), member of the SPS1 subgroup of the STE20-like protein family, a serine-threonine kinase that prefers manganese as a cofactor and uses either GTP or ATP as a phosphate donor</p>                                                                                                      |
| <p>SW:RAPB_HUMAN P09526 homo sapiens (human), and bos taurus (bovine). ras-related protein rap-1b (gtp-binding protein smg p21b). 7/1993 [MASS=20825]/Ras related protein 1b, member of the Ras superfamily of low molecular weight GTP-binding proteins, regulates cell cycle progression and cellular proliferation, may play a role in cAMP-responsive tumorigenesis</p>                                                                                                                 |
| <p>SW:MOES_HUMAN P26038 homo sapiens (human). moesin (membrane-organizing extension spike protein). 6/1994 [MASS=67689]/Moesin, putative receptor that may link the cytoskeleton and plasma membrane and play roles in microvillus assembly and cell morphogenesis, may be an autoantigen in rheumatoid arthritis and may play a role in impaired brain development in Down syndrome</p>                                                                                                    |
| <p>SW:CAP1_HUMAN Q01518 homo sapiens (human). adenylyl cyclase-associated protein 1 (cap 1). 10/1996 [MASS=51673]/Adenylyl cyclase-associated protein 1, putative homolog of bifunctional S. cerevisiae Srv2p, C-terminus mediates actin binding and may play a role in regulating cell growth and morphogenesis, the N-terminal domain may bind and/or regulate adenylyl cyclase</p>                                                                                                       |
| <p>GP:AF001628_1 Homo sapiens interactor protein AbIBP4 (AbIBP4) mRNA, complete cds; member of the Abl interactor protein family; contains an SH3 domain and an SH3 binding domain. [MASS=49305]/Spectrin SH3 domain binding protein 1, has an SH3 domain, binds SH3 domains of EPS8, ABL1, and spectrin (SPTA1), acts in pinocytosis, inhibits cell proliferation; fusion of the corresponding gene with the MLL gene is linked to acute myelogenous leukemia</p>                          |

|                                                                                                                                                                                                                                                                                                                                                                                                                                                                                         |
|-----------------------------------------------------------------------------------------------------------------------------------------------------------------------------------------------------------------------------------------------------------------------------------------------------------------------------------------------------------------------------------------------------------------------------------------------------------------------------------------|
| <p>SW:EGFR_HUMAN P00533 homo sapiens (human). epidermal growth factor receptor precursor (ec 2.7.1.112). 12/1998 [MASS=134277]/Epidermal growth factor receptor, a receptor protein tyrosine kinase that binds epidermal growth factor (EGF) and transforming growth factor alpha (TGFA), involved in cell proliferation and differentiation, implicated in tumor invasion and metastasis</p>                                                                                           |
| <p>GP:AB014718_1 Homo sapiens DR5 gene, exon 9 and complete cds. [MASS=47894]/Tumor necrosis factor receptor superfamily member 10b, receptor that binds the ligand TRAIL (TNFSF10), induces apoptosis through interaction with FADD and activation of caspase 8 (CASP8), loss of apoptotic function is associated with cancer</p>                                                                                                                                                      |
| <p>SW:TDXN_HUMAN Q13162 homo sapiens (human). thioredoxin peroxidase a0372 (thioredoxin-dependent peroxide reductase a0372) (antioxidant enzyme aoe372) (aoe37-2). 7/1999 [MASS=30540]/Peroxiredoxin 4, a thioredoxin dependent peroxidase that is regulated by interactions with other thiol peroxidases, may mediate hydrogen peroxide activation of NF-kappaB by modulating phosphorylation of cytoplasmic I kappa B-alpha (NFKBIA)</p>                                              |
| <p>SW:RAC3_HUMAN O14658 homo sapiens (human). ras-related c3 botulinum toxin substrate 3 (p21-rac3). 12/1998 [MASS=21379]/Ras-related C3 botulinum toxin substrate 3, a Rho family GTPase involved in integrin signaling via alphaIIb-beta3 (ITGA2B, ITGB3), binds CIB1, regulates cell-matrix adhesion and may activate the JNK pathway and stimulate tumor cell growth</p>                                                                                                            |
| <p>SW:RHOB_HUMAN P01121 homo sapiens (human), mus musculus (mouse), and rattus norvegicus (rat). transforming protein rhob (h6). 12/1998 [MASS=22123]/Ras-related GTP binding protein of the rho subfamily, member B; may regulate assembly of actin stress fibers and focal adhesions; very strongly similar to murine Arhb</p>                                                                                                                                                        |
| <p>GP:AF091035_1 Homo sapiens GTP-binding protein RAB21 (RAB21) mRNA, complete cds. [MASS=24348]/Ras related GTP binding protein, member of the Rab subfamily of the Ras superfamily of small GTP binding proteins, may be involved in apically directed vesicle-mediated transport in polarized intestinal epithelium</p>                                                                                                                                                              |
| <p>SW:CTN1_HUMAN P35221 homo sapiens (human). alpha-1 catenin (cadherin-associated protein) (alpha e-catenin). 11/1997 [MASS=100071]/Catenin alpha 1 (cadherin-associated protein); binds cadherins and links them with the actin cytoskeleton</p>                                                                                                                                                                                                                                      |
| <p>GP:AB018358_1 Homo sapiens mRNA for ABP125, complete cds; This sequence is a product of alternative splicing of human ABP130. [MASS=129053]/Secretion 31 homolog, a putative component of the COPII coat of secretory pathway vesicles involved in endoplasmic reticulum to Golgi transport, plays a role in intracellular protein trafficking</p>                                                                                                                                   |
| <p>SW:RGP1_HUMAN P46060 homo sapiens (human). ran-gtpase activating protein 1. 7/1999 [MASS=63542]/Ran GTPase activating protein 1, a GTPase activator for ras family GTP binding protein RAN, ubiquitin-like SUMO-1 modification results in localization to the nuclear pore complex, required for nuclear protein import when bound to RANBP2</p>                                                                                                                                     |
| <p>SW:KCCB_HUMAN Q13554 homo sapiens (human). calcium/calmodulin-dependent protein kinase type ii beta chain (cam-kinase ii beta chain) (ec 2.7.1.123) (camk-ii, beta subunit) (fragment). 5/2000 [MASS=15141]/Calcium calmodulin-dependent protein kinase II beta subunit, putative roles in signal transduction and cell growth, increased expression may play a role in schizophrenia; variant forms of the corresponding gene are expressed in tumor cells</p>                      |
| <p>SW:ITAV_HUMAN P06756 homo sapiens (human). vitronectin receptor alpha subunit precursor (integrin alpha-v) (cd51). 12/1998 [MASS=116052]/Alpha V subunit integrin, a subunit of the vitronectin receptor that is involved in cell-matrix interactions, chemotaxis, phagocytosis and angiogenesis, may contribute to the tumorigenicity of cutaneous malignant melanoma and invasive breast cancer</p>                                                                                |
| <p>SW:IQGA_HUMAN P46940 homo sapiens (human). ras gtpase-activating-like protein iqgap1 (p195) (kiaa0051). 7/1999 [MASS=189252]/IQ motif-containing GTPase activating protein 1, an actin-associated calmodulin (CALM1)-regulated protein that serves as an effector for CDC42 and RAC1, modulates E-cadherin (CDH1)-mediation cellular adhesion, upregulated in colon carcinomas</p>                                                                                                   |
| <p>SW:GBAK_HUMAN P08754 homo sapiens (human). guanine nucleotide-binding protein g(k), alpha subunit (g(i) alpha-3). 11/1997 [MASS=40401]/G protein alpha i3 subunit, a component of pertussis toxin sensitive heterotrimeric G protein complexes, transduces signals from G protein-coupled receptors to intracellular effectors, inhibits forskolin-stimulated cAMP production</p>                                                                                                    |
| <p>SW:P2AA_HUMAN P05323 homo sapiens (human), oryctolagus cuniculus (rabbit), sus scrofa (pig), and bos taurus (bovine). serine/threonine protein phosphatase 2a, catalytic subunit, alpha isoform (ec 3.1.3. [MASS=35594]/Protein phosphatase 2 catalytic subunit alpha, a catalytic subunit of protein phosphatase 2A involved in regulating diverse cellular processes via protein phosphorylation</p>                                                                               |
| <p>SW:FKB1_HUMAN P20071 homo sapiens (human), and oryctolagus cuniculus (rabbit). fk506-binding protein (fkbp-12) (peptidyl-prolyl cis-trans isomerase) (ec 5.2.1.8) (ppiase) (rotamase) (immunophilin fkbp12 [MASS=11820]/FK506-binding protein 1A, peptidyl prolyl cis-trans isomerase, modulates the Ca2+-release activity of ryanodine receptors, complex with FK506 inhibits calcineurin-dependent lymphokine gene transcription and mediates FK506 immunosuppressive activity</p> |
| <p>SW:CTNB_HUMAN P35222 homo sapiens (human). beta-catenin. 2/1996 [MASS=85497]/Beta catenin, links cadherins to the cytoskeleton, may act as a component of the Wnt signal transduction pathway transmitting nuclear signals via a complex with LEF1 and TCF transcription factors; mutations in the gene are associated with various cancers</p>                                                                                                                                      |
| <p>SW:Y253_HUMAN Q92542 homo sapiens (human). hypothetical protein kiaa0253 (fragment). 7/1998 [MASS=78280]/Nicastrin, a transmembrane glycoprotein that may be required for the assembly and transport of presenilin complex that processes amyloid precursor protein (APP), may play a role in notch signaling and abnormal APP processing in Alzheimer disease</p>                                                                                                                   |

|                                                                                                                                                                                                                                                                                                                                                                                                                                                  |
|--------------------------------------------------------------------------------------------------------------------------------------------------------------------------------------------------------------------------------------------------------------------------------------------------------------------------------------------------------------------------------------------------------------------------------------------------|
| GP:U70735_1 Homo sapiens 34 kDa Mov34 homolog mRNA, complete cds; similar to Mov34. [MASS=33576]/COP9 subunit 6, putative translation initiation factor and a subunit of COP9 signalosome, which mediates p53 (human TP53) degradation, may be involved in G2-M phase transition of cell cycle                                                                                                                                                   |
| SW:BASI_HUMAN P35613 homo sapiens (human). basigin precursor (leukocyte activation antigen m6) (collagenase stimulatory factor) (extracellular matrix metalloproteinase inducer) (emmprin) (5f7) (cd147 an [MASS=29221]/Basigin (OK blood group), a cyclophilin receptor of the immunoglobulin family, enhances cancer progression by increasing the production and activation of MMP2 and enhances infectivity of HIV 1 virions                 |
| SW:SRC_HUMAN P12931 homo sapiens (human). proto-oncogene tyrosine-protein kinase src (ec 2.7.1.112) (p60-src) (c-src). 5/2000 [MASS=59704]/V-src avian sarcoma viral oncogene homolog (Schmidt-Ruppin A-2), tyrosine kinase involved in cell proliferation, cell adhesion, and cytoskeletal organization, implicated in the progression of colon cancer and certain breast tumors                                                                |
| SW:ITA6_HUMAN P23229 homo sapiens (human). integrin alpha-6 precursor (vla-6) (cd49f). 5/2000 [MASS=119462]/Integrin alpha 6, a laminin receptor and component of hemidesmosomes, participates in the maintenance of epidermal integrity; gene mutations are responsible for epidermolysis bullosa and overexpression is correlated with carcinoma invasiveness                                                                                  |
| SW:ABP2_HUMAN P21333 homo sapiens (human). endothelial actin-binding protein (abp-280) (nonmuscle filamin) (filamin 1). 11/1997 [MASS=280761]/Filamin A (alpha), an actin crosslinking phosphoprotein involved in actin cytoskeletal organization, signal transduction, and mechanical stimulus response, may contribute to cell adhesion; genetic mutations are associated with periventricular heterotopia                                     |
| SWN:P23_HUMAN Q15185 homo sapiens (human). telomerase-binding protein p23 (hsp90 co-chaperone) (progesterone receptor complex p23). 8/2001 [MASS=18697]/Inactive progesterone receptor (23kD), cochaperone with prostaglandin E synthase activity that is a component of the unstimulated progesterone receptor complex and that enhances receptor complex formation through interactions with Hsp90 (HSPCA)                                     |
| SW:KPC1_HUMAN P05771 homo sapiens (human). protein kinase c, beta-i type (ec 2.7.1.-) (pkc-beta-1). 7/1999 [MASS=76839]/Protein kinase C beta 1, conventional PKC expressed as beta I and beta II forms, beta II mediates G2/M phase transition, mitotic nuclear envelope breakdown, neutrophil NADPH oxidase assembly; rat Prkcb1 activity is enhanced in diabetes mellitus                                                                     |
| SW:GPS1_HUMAN Q13098 homo sapiens (human). g protein pathway suppressor 1 (gps1 protein) (mfh protein). 11/1997 [MASS=53372]/G protein pathway suppressor 1, suppressor of G protein and MAP kinase-mediated signaling pathways                                                                                                                                                                                                                  |
| SW:MPRI_HUMAN P11717 homo sapiens (human). cation-independent mannose-6-phosphate receptor precursor (ci man-6-p receptor) (ci-mpr) (insulin-like growth factor ii receptor) (300 kda mannose 6-phosphate [MASS=274309]/Insulin-like growth factor II receptor, functions in transport of mannose 6-phosphate-containing lysosomal enzymes and IGF-II maturation and clearance, mediates granzyme B-induced apoptosis, putative tumor suppressor |
| GP:AF124145_1 Homo sapiens autocrine motility factor receptor (AMFR) mRNA, complete cds. [MASS=73022]/Autocrine motility factor receptor, a cell surface transmembrane glycoprotein involved in cell motility signaling and metastasis, acts as a ubiquitin ligase involved in protein degradation, associated with tumor progression in various carcinomas                                                                                      |
| GP:AF087020_1 Homo sapiens protein zero related protein (PZR) mRNA, complete cds; immunoglobulin superfamily member. [MASS=29082]/Myelin protein zero-like 1, a member of the immunoglobulin superfamily that is a concanavalin A (ConA) receptor, mediates ConA and c-Src (SRC) signaling, may be a plasma membrane anchor for SHP-2 (PTPN11) type I, contains two ITIM motifs                                                                  |
| GP:AB002382_1 Human mRNA for KIAA0384 gene, complete cds. [MASS=104952]/Catenin delta 1, a member of the catenin family of cadherin-binding proteins that link cadherins to the cytoskeleton, acts in cell signaling, plays a role in cell migration, loss of expression is correlated with bladder, colorectal and other cancer                                                                                                                 |
| PIR2:B55053 endothelial monocyte-activating protein II precursor - human [MASS=34254]/Endothelial monocyte activating polypeptide II, a proinflammatory cytokine that interacts with ATP synthase and inhibits endothelial cell growth, released during apoptosis, may sensitize tumors to killing by tumor necrosis factor alpha (TNF)                                                                                                          |
| SW:RHOG_HUMAN P35238 homo sapiens (human), and cricetus cricetus (black-bellied hamster). rho-related gtp-binding protein rhog. 11/1995 [MASS=21309]/Aplysia ras-related homolog G (RhoG), a Ras-related GTP-binding protein of the rho-subfamily which regulates reorganization of the actin cytoskeleton and may be involved in the regulation of cholesterol excretion in patients with Tangier disease                                       |
| SW:G25B_HUMAN P21181 homo sapiens (human), mus musculus (mouse), and bos taurus (bovine). g25k gtp-binding protein, brain isoform (gp) (cdc42 homolog). 12/1998 [MASS=21311]/Cell division cycle 42 (GTP binding protein 25kD), Rho GTPase involved in actin cytoskeleton organization, cell migration, cell cycle progression and apoptosis, downregulated in fibroblasts and macrophages from patients with Tangiers disease                   |
| SW:ITA5_HUMAN P08648 homo sapiens (human). integrin alpha-5 precursor (fibronectin receptor alpha subunit) (integrin alpha-f) (vla-5) (cd49e). 7/1999 [MASS=114508]/Integrin alpha 5, acts as a receptor for fibronectin, mediates binding of the cell to the extracellular matrix, involved in cell migration and trophoblast invasion; upregulation is associated with metastatic melanomas and carcinomas                                     |

|                                                                                                                                                                                                                                                                                                                                                                                                                                                                                                                                                                     |
|---------------------------------------------------------------------------------------------------------------------------------------------------------------------------------------------------------------------------------------------------------------------------------------------------------------------------------------------------------------------------------------------------------------------------------------------------------------------------------------------------------------------------------------------------------------------|
| <p>GP:AB006534_1 Homo sapiens mRNA for hepatocyte growth factor activator inhibitor type 2, complete cds. [MASS=28169]/Serine protease inhibitor Kunitz type 2 (bikunin), inhibits hepatocyte growth factor activator (HGFAC) and serine proteases involved in coagulation and fibrinolysis, overexpressed in pancreatic cancer, may play roles in urolithiasis and glioma progression</p>                                                                                                                                                                          |
| <p>SW:143T_HUMAN P27348 homo sapiens (human). 14-3-3 protein tau (14-3-3 protein theta) (14-3-3 protein t-cell) (hs1 protein). 11/1997 [MASS=27764]/14-3-3 theta (14-3-3 tau in T-cells), may modulate T-cell signaling and cytokine expression through interaction with and inhibition of protein kinase C and phosphatidylinositol 3-kinase, may promote cell survival during amyotrophic lateral sclerosis (ALS)</p>                                                                                                                                             |
| <p>GP:AC002306_1 Homo sapiens DNA from chromosome 19-cosmid R33799, genomic sequence, complete sequence; hypothetical human G-protein coupled receptor on 19p; hypothetical human protein with BLASTX similarity to G protein-coupled receptor Rec1.3 [Mus musculus],(U4823 [MASS=39084]/Endothelial differentiation lysophosphatidic acid (LPA) G protein-coupled receptor 4, activated by saturated and unsaturated LPA, elevates intracellular Ca<sup>2+</sup> and cAMP levels, activates MAP kinase, may mediate LPA-induced tumor growth in ovarian cancer</p> |
| <p>SW:GBB2_HUMAN P11016 homo sapiens (human). guanine nucleotide-binding protein g(i)/g(s)/g(t) beta subunit 2 (transducin beta chain 2). 5/2000 [MASS=37331]/Guanine nucleotide binding protein beta 2, component of heterotrimeric G protein complexes that transduce signals from G protein-coupled receptors to intracellular effectors, complex with Ggamma mediates inhibition of N- and PQ-type calcium channels</p>                                                                                                                                         |
| <p>GP:AF151793_1 Homo sapiens ALG-2 interacting protein 1 (AIP1) mRNA, complete cds. [MASS=96079]/Protein with very strong similarity to murine Mm.28049, which interacts with the activin type IIA receptor and signaling molecule Smad3, has very strong similarity to rat Rn.29998, which is a synaptic scaffolding protein, contains PDZ and WW domains</p>                                                                                                                                                                                                     |
| <p>GP:AB025194_1 Homo sapiens mRNA for protein tyrosine phosphatase HD-PTP, complete cds. [MASS=178974]/Member of the protein-tyrosine phosphatase family, has a region of strong similarity to a region of protein tyrosine phosphatase TD14 (rat Ptpn23), which is a putative tyrosine phosphatase that associates with cytoplasmic vesicles when overexpressed</p>                                                                                                                                                                                               |
| <p>GP:D87930_1 Homo sapiens mRNA for myosin phosphatase target subunit 1 (MYPT1); MYPT1. [MASS=115281]/Myosin phosphatase target subunit 1, a signal transducer that is involved in Rho-mediated regulation of myosin light chain dephosphorylation, may function in muscle contraction</p>                                                                                                                                                                                                                                                                         |
| <p>PIR2:T46270 hypothetical protein DKFZp564N1563.1 - human (fragment) [MASS=77321]/Filamin B (beta, actin-binding protein-278), may be involved in actin cytoskeleton organization through interaction with the cytoplasmic domain of glycoprotein Ib alpha (GP1BA) and mediation of thyrotropin-induced actin microfilament disruption</p>                                                                                                                                                                                                                        |
| <p>SW:RHOA_HUMAN P06749 homo sapiens (human), and bos taurus (bovine), transforming protein rhoa (h12). 7/1998 [MASS=21768]/Ras homolog gene family member A, monomeric GTPase of the Rho family that mediates cell surface receptor and integrin signaling, induces actin stress fiber and focal adhesion formation, activity may contribute to cellular transformation and tumor invasion</p>                                                                                                                                                                     |
| <p>SW:APP2_HUMAN Q06481 homo sapiens (human). amyloid-like protein 2 precursor (amyloid protein homolog) (apph) (cdeibox binding protein) (cdebp). 5/2000 [MASS=86956]/Amyloid precursor-like protein 2, a nuclear protein whcih may contribute to neurogenesis and cell cycle control</p>                                                                                                                                                                                                                                                                          |
| <p>PIR2:I38176 ras-related GTPase rag, splice form A [imported] - human [MASS=36566]/Ras-related GTP binding protein, a GTP-binding protein that lacks GTPase activity, interacts with RAGC (GTR2), RAGD, and the adenovirus 14.7 kDa E3 protein, may be part of the tumor necrosis factor alpha (TNF) signaling pathway</p>                                                                                                                                                                                                                                        |
| <p>GP:AF092130_1 Homo sapiens GTP-binding protein Sara mRNA, complete cds. [MASS=22410]/Mothers against decapentaplegic homolog interacting protein receptor activation anchor (Smad anchor for receptor activation), an early endosomal protein involved in activin- and TGF beta-mediated Smad activation, binds phosphatidylinositol 3-phosphate</p>                                                                                                                                                                                                             |
| <p>PIR2:S29815 N-ras upstream protein NRU - human [MASS=88885]/Pyrimidinergic receptor P2Y4, a G protein-coupled nucleotide receptor activated by UTP and ATP and insensitive to inhibition by suramin, signals through stimulation of phosphoinositide hydrolysis and elevation of intracellular calcium</p>                                                                                                                                                                                                                                                       |
| <p>SW:MK01_HUMAN P28482 homo sapiens (human). mitogen-activated protein kinase 1 (ec 2.7.1.-) (extracellular signal-regulated kinase 2) (erk2) (mitogen-activated protein kinase 2) (map kinase 2) (mapk 2) [MASS=41390]/Mitogen-activated protein kinase 1, a serine-threonine kinase effector of the RAS-MAP kinase pathway, translocates to the nucleus to mediate transcription when activated, involved in the regulation of cell growth, differentiation, migration and apoptosis</p>                                                                         |
| <p>SW:PRO1_HUMAN P07737 homo sapiens (human). profilin i. 12/1998 [MASS=14923]/Profilin I, a protein that regulates actin polymerization in response to extracellular signals and may suppress breast cancer cell tumorigenicity</p>                                                                                                                                                                                                                                                                                                                                |
| <p>SW:LYN_HUMAN P07948 homo sapiens (human). tyrosine-protein kinase lyn (ec 2.7.1.112). 5/2000 [MASS=58443]/ protein tyrosine kinase, a non-receptor tyrosine kinase important in cytokine receptor- and IgE receptor-mediated signal transduction, regulates cell adhesion and apoptosis, plays a role in platelet activation and inflammatory responses</p>                                                                                                                                                                                                      |
| <p>SW:RAPA_HUMAN P10113 homo sapiens (human), rattus norvegicus (rat), and bos taurus (bovine). ras-related protein rap-1a (c21kg) (krev-1 protein) (gtp-binding protein smg-p21a) (g-22k). 12/1998 [MASS=20987]/RAP1A member of RAS oncogene family (Ras-related protein 1a), a member of the Ras superfamily of low molecular weight GTPases that is involved in cell cycle control and negative regulation of cellular proliferation, acts as a tumor suppressor</p>                                                                                             |

|                                                                                                                                                                                                                                                                                                                                                                                                                                                                                        |
|----------------------------------------------------------------------------------------------------------------------------------------------------------------------------------------------------------------------------------------------------------------------------------------------------------------------------------------------------------------------------------------------------------------------------------------------------------------------------------------|
| SW:RAN_HUMAN P17080 homo sapiens (human). gtp-binding nuclear protein ran (tc4). 12/1998 [MASS=24354]/RAN, member of the ras family of GTP binding proteins, couples completion of DNA synthesis to mitosis and induces mitotic spindle formation, involved in nuclear transport of RNA and proteins, interacts with polyglutamate repeats of the androgen receptor                                                                                                                    |
| SW:EFA5_HUMAN P52803 homo sapiens (human). ephrin-a5 precursor (eph-related receptor tyrosine kinase ligand 7) (lerk-7) (al-1). 5/2000 [MASS=26297]/Ephrin A5, a ligand of Eph-related receptor tyrosine kinases that is attached to the membrane via glycosylphosphatidylinositol linkage and is developmentally regulated in the brain, and may play a role during neurogenesis                                                                                                      |
| SW:CD59_HUMAN P13987 homo sapiens (human). cd59 glycoprotein precursor (membrane attack complex inhibition factor) (macif) (mac-inhibitory protein) (mac-ip) (mem43 antigen) (protectin) (membrane inhibit [MASS=14177]/CD59 antigen (protectin), plasma membrane-secreted protein, inhibits formation of the membrane attack complex and protects against complement-mediated cell lysis, acts as a T-cell co-activator, may contribute to tumor cell escape from immune surveillance |
| SW:SRD6_HUMAN O15173 homo sapiens (human). steroid receptor protein dg6. 5/2000 [MASS=23818]/Progesterone receptor membrane component 2, putative transmembrane steroid hormone receptor, preferentially expressed in placenta                                                                                                                                                                                                                                                         |
| GP:U41806_1 Human EBI3-associated protein p60 mRNA, complete cds; EBI3-associated protein. [MASS=47602]/Sequestosome 1 (ubiquitin-binding protein p62), a ubiquitin-binding protein with a zinc finger-like motif, a G protein-binding region and a PEST motif, interacts with several signal transduction pathways, may be involved in endosome to lysosome transport                                                                                                                 |
| SW:KAP2_HUMAN P13861 homo sapiens (human). camp-dependent protein kinase type ii-alpha regulatory chain. 5/2000 [MASS=45387]/cAMP-dependent Protein kinase A regulatory subunit alpha (type II), binds A-kinase anchoring proteins to mediate holoenzyme localization and plays important roles in sperm motility and in trophoblast cell differentiation                                                                                                                              |
| SW:KCCD_HUMAN Q13557 homo sapiens (human). calcium/calmodulin-dependent protein kinase type ii delta chain (cam-kinase ii delta chain) (ec 2.7.1.123) (camk-ii, delta subunit) (fragment). 5/2000 [MASS=12846]/Calcium/calmodulin-dependent protein kinase II delta, member of the multifunctional CAMKII family involved in Ca2+ regulated processes; alternative form delta 3 is specifically upregulated in the myocardium of patients with heart failure                           |
| SW:KRCB_HUMAN P31751 homo sapiens (human). rac-beta serine/threonine kinase (ec 2.7.1.-) (rac-pk-beta) (akt2 kinase). 11/1995 [MASS=55769]/v-akt murine thymoma viral oncogene homolog 2, protein kinase that is activated by mitogens and survival factors, may regulate cell proliferation and apoptosis, overexpression is associated with ovarian, breast and pancreatic cancers                                                                                                   |
| SW:PTN1_HUMAN P18031 homo sapiens (human). protein-tyrosine phosphatase 1b (ec 3.1.3.48) (ptp-1b). 7/1999 [MASS=49967]/Protein tyrosine phosphatase non-receptor type I, likely involved in the negative regulation of insulin receptor signaling, may be associated with type II diabetes and obesity                                                                                                                                                                                 |
| SW:FASA_HUMAN P25445 homo sapiens (human). fasl receptor precursor (apoptosis-mediating surface antigen fas) (apo-1 antigen) (cd95 antigen). 11/1997 [MASS=37732]/Apoptosis antigen ligand 1, a tumor necrosis factor alpha related cytokine that binds Fas and induces apoptosis, plays important roles in immune system development, immune response and tumorigenesis, may be a prognostic tumor marker                                                                             |
| SW:FK38_HUMAN Q14318 homo sapiens (human). 38 kda fk-506 binding protein homolog (fkbp38). 5/2000 [MASS=38408]/FK506 binding protein, member of a subclass of immunophilins, contains tetratricopeptide repeat and a consensus leucine zipper domains                                                                                                                                                                                                                                  |
| GP:AF260566_1 Homo sapiens hepatocyte growth factor-regulated tyrosine kinase substrate HRS isoform 2 (HRS) mRNA, complete cds. [MASS=76362]/Hepatocyte growth factor regulated tyrosine kinase substrate, zinc-finger protein with ATPase activity, tyrosine phosphorylated upon growth factor stimulation, involved in endosome trafficking and mediates FOS transcription via cytokine signaling                                                                                    |
| SW:ERBB2_HUMAN P04626 homo sapiens (human). receptor protein-tyrosine kinase erbB-2 precursor (ec 2.7.1.112) (p185erbb2) (neu proto-oncogene) (c-erbB-2) (tyrosine kinase-type cell surface receptor her2) [MASS=137910]/Avian erythroblastosis oncogene B 2, a receptor tyrosine kinase and most oncopotent member of the EGF receptor family, heterodimerizes with other EGFRs; overexpression contributes to growth, metastasis and chemoresistance of epithelial-derived tumors    |
| SW:RAC1_HUMAN P15154 homo sapiens (human), mus musculus (mouse), and canis familiaris (dog). ras-related c3 botulinum toxin substrate 1 (p21-rac1) (ras-like protein tc25). 12/1998 [MASS=21450]/Ras-related C3 botulinum toxin substrate 1, a monomeric GTPase of the Rho family, involved in transducing signals that regulate proliferation, apoptosis, cytoskeletal organization, and response to oxidative stress, contributes to tumor cell invasiveness                         |
| PIR2:T47172 hypothetical protein DKFZp762H186.1 - human (fragment) [MASS=55769]/Coronin actin-binding protein 1C, a member of the coronin-like protein family, has five WD repeats and a coiled-coil motif, a putative actin binding protein that may play a role in mitosis, cytokinesis, cell motility, signal transduction, and phagocytosis                                                                                                                                        |
| GP:AK022871_1 Homo sapiens cDNA FLJ12809 fis, clone NT2RP2002408, highly similar to Homo sapiens mRNA for TOLLIP protein; unnamed protein product. [MASS=22813]/Tollip, mediates interleukin-1 receptor signaling through interaction with serine/threonine kinase IRAK, inhibits the activity of IRAK1, inhibits lipopolysaccharide-induced activation of macrophages and TLR2 and TLR4 induced activation of NF-KB                                                                   |

|                                                                                                                                                                                                                                                                                                                                                                                                                                                                                                                       |
|-----------------------------------------------------------------------------------------------------------------------------------------------------------------------------------------------------------------------------------------------------------------------------------------------------------------------------------------------------------------------------------------------------------------------------------------------------------------------------------------------------------------------|
| <p>SW:A4_HUMAN P05067 homo sapiens (human). alzheimer's disease amyloid a4 protein precursor (protease nexin-ii) (pn-ii) (appi) [contains: beta-amyloid protein (beta-app) (a-beta)]. 5/2000 [MASS=86943]/Amyloid beta (A4) precursor protein, cell surface protease inhibitor that reduces copper, deposits of proteolytic peptide products are found in Alzheimer's disease and Down syndrome brains, deficiency is associated with early-onset Alzheimer's disease</p>                                             |
| <p>PIR1:JC5394 DJ-1 protein - human [MASS=19847]/RNA-binding protein regulatory subunit, a putative oncogene that may regulate the androgen receptor, play a role in RAS protein signal transduction, and is predicted to play a role in fertilization</p>                                                                                                                                                                                                                                                            |
| <p>GP:AB011126_1 Homo sapiens mRNA for KIAA0554 protein, partial cds. [MASS=77448]/Formin binding protein 17, contains a Src homology 3 (SH3) domain and a Fes/CIP4 homology domain, binds SNX2 and may mediate the assembly of protein signaling complexes; gene is a fusion partner with MLL in acute myelogenous leukemia</p>                                                                                                                                                                                      |
| <p>SW:143Z_HUMAN P29312 homo sapiens (human), and bos taurus (bovine). 14-3-3 protein zeta/delta (protein kinase c inhibitor protein-1) (kci-1) (factor activating exoenzyme s) (fas). 7/1999 [MASS=27745]/14-3-3 zeta, mediates various signal transduction pathways, including inhibition of protein kinase C and activation of inositol polyphosphate 5-phosphatase, phospholipase A2 activity is questionable; may be associated with Alzheimer's disease</p>                                                     |
| <p>GP:AL096767_2 Human DNA sequence from clone 579N16 on chromosome 22. Contains the 3' part of the gene for KIAA0685, the SBF1 gene for SET binding factor 1, a novel gene, ESTs, an STS, GSSs and three putative CpG islands, complete sequence; owing to approximately 7 [MASS=182476]/SET binding factor 1, a pseudo phosphatase that is inactive as a phosphatase and may act as a competitive inhibitor of other protein phosphatases, regulates cellular growth and may have a role in signal transduction</p> |
| <p>SW:NTC1_HUMAN P46531 homo sapiens (human). neurogenic locus notch protein homolog 1 precursor (translocation-associated notch protein tan-1) (fragment). 2/1996 [MASS=260649]/Notch homolog 1, a transcriptional regulator involved in different types of cell proliferation and differentiation (especially blood cells), may play a role in cell cycle control; gene translocation is associated with T-cell leukemia</p>                                                                                        |
| <p>SW:GBI2_HUMAN P04899 homo sapiens (human). guanine nucleotide-binding protein g(i), alpha-2 subunit (adenylate cyclase-inhibiting g alpha protein). 12/1998 [MASS=40320]/G protein alpha subunit i2, a component of pertussis toxin sensitive heterotrimeric G protein complexes that transduces signals to effectors and inhibits adenylyl cyclase; mutations in the gene are associated with tachycardia and endocrine tumors</p>                                                                                |
| <p>SW:EPA7_HUMAN Q15375 homo sapiens (human). ephrin type-a receptor 7 precursor (ec 2.7.1.112) (tyrosine-protein kinase receptor ehk-3) (eph homology kinase-3) (receptor protein- tyrosine kinase hek11). 5 [MASS=112097]/ Ephrin type A receptor 7, an Eph-related receptor tyrosine kinase, interacts with the PDZ domain of the Ras binding protein AF6 (MLLT4), may be involved in cell signaling</p>                                                                                                           |
| <p>GP:AB002313_1 Human mRNA for KIAA0315 gene, partial cds. [MASS=205412]/Plexin B2, putative semaphorin receptor that may be involved in mediating cell guidance</p>                                                                                                                                                                                                                                                                                                                                                 |
| <p>SW:ER60_HUMAN P30101 homo sapiens (human). probable protein disulfide isomerase er-60 precursor (ec 5.3.4.1) (erp60) (58 kda microsomal protein) (p58) (grp58) (erp57). 7/1998 [MASS=56782]/Glucose regulated 58kDa protein, acts as a protein disulfide isomerase and possibly a protease, involved in folding and maturation of N-linked glycoproteins and MHC class I antigen processing; identified as a sperm antigen in immunological infertility</p>                                                        |
| <p>SW:INSR_HUMAN P06213 homo sapiens (human). insulin receptor precursor (ec 2.7.1.112) (ir). 5/2000 [MASS=156281]/Insulin receptor, a transmembrane receptor protein tyrosine kinase involved in carbohydrate metabolism, energy pathways, and cell growth; gene mutation is associated with insulin-resistant diabetes mellitus and leprechaunism</p>                                                                                                                                                               |
| <p>SW:PI52_HUMAN P48426 homo sapiens (human). phosphatidylinositol-4-phosphate 5-kinase type ii alpha (ec 2.7.1.68) (pip5kii-alpha) (1-phosphatidylinositol-4-phosphate kinase) (ptdins(4)p-5-kinase b isoform) [MASS=46193]/Phosphatidylinositol-4-phosphate 5-kinase type II, alpha, a member of a family of kinases responsible for the synthesis of PtdIns(4,5)P2</p>                                                                                                                                             |
| <p>GP:BC018192_1 Homo sapiens, inositol 1,3,4-triphosphate 5/6 kinase, clone MGC:21491 IMAGE:3867269, mRNA, complete cds. [MASS=45621]/Inositol 1,3,4-triphosphate 5-6 kinase, phosphorylates Ins(1,3,4)P3 to form Ins(1,3,4,5)P4 and Ins(1,3,4,6)P4, regulates inositol phosphate metabolism; variant form phosphorylates Ins(3,4,5,6)P4 to yield Ins(1,3,4,5,6)P5</p>                                                                                                                                               |
| <p>SW:TRA2_HUMAN Q12933 homo sapiens (human). tnfr receptor associated factor 2 (traf2) (tumor necrosis factor type 2 receptor associated protein 3). 5/2000 [MASS=55794]/TNF receptor-associated factor 2, interacts with and mediates tumor necrosis factor signaling through activation of NF-kappaB cascade, functions as an apoptosis inhibitor</p>                                                                                                                                                              |
| <p>SW:GBB1_HUMAN P04901 homo sapiens (human), mus musculus (mouse), bos taurus (bovine), and canis familiaris (dog). guanine nucleotide-binding protein g(i)/g(s)/g(t) beta subunit 1 (transducin beta chain) [MASS=37377]/Guanine nucleotide binding protein (G protein) beta 1, a component of heterotrimeric G protein complexes, plays a role in signal transduction</p>                                                                                                                                          |
| <p>SW:KAPA_HUMAN P17612 homo sapiens (human). camp-dependent protein kinase, alpha-catalytic subunit (ec 2.7.1.37) (pka c-alpha). 5/2000 [MASS=40458]/Catalytic subunit C alpha of cAMP-dependent protein kinase, plays a role in transcriptional regulation and may mediate suppression of apoptosis, may also serve as a tumor biomarker; alternative form C alpha 2 may play a role in sperm development</p>                                                                                                       |
| <p>GP:AF020202_1 Homo sapiens Munc13 mRNA, complete cds; contains C2 domains; similar to R. norvegicus Munc13-2 encoded by GenBank Accession Number U24071. [MASS=180684]/UNC13 (C. elegans)-like, a diacylglycerol receptor that may function in a PKC-independent, diacylglycerol-activated signaling pathway that induces apoptosis, may be involved in renal cell injury in hyperglycemia</p>                                                                                                                     |

|                                                                                                                                                                                                                                                                                                                                                                                                                                                                                           |
|-------------------------------------------------------------------------------------------------------------------------------------------------------------------------------------------------------------------------------------------------------------------------------------------------------------------------------------------------------------------------------------------------------------------------------------------------------------------------------------------|
| <p>SW:BCR_HUMAN P11274 homo sapiens (human). breakpoint cluster region protein (ec 2.7.1.-). 7/1999<br/> [MASS=142806]/Breakpoint cluster region, GTPase-activating protein for p21rac with serine/threonine kinase activity; translocation of the corresponding gene is associated with Philadelphia chromosome-positive chronic myeloid leukemia</p>                                                                                                                                    |
| <p>GP:AB037857_1 Homo sapiens mRNA for KIAA1436 protein, partial cds; Start codon is not identified..<br/> [MASS=102996]/Prostaglandin F2 alpha receptor regulatory protein, a putative transmembrane glycoprotein that copurifies with and negatively regulates the prostaglandin F2 alpha receptor by inhibiting ligand-binding</p>                                                                                                                                                     |
| <p>SW:P2BA_HUMAN Q08209 homo sapiens (human). serine/threonine protein phosphatase 2b catalytic subunit, alpha isoform (ec 3.1.3.16) (calmodulin-dependent calcineurin a subunit, alpha isoform) (cam-prp cat [MASS=58688]/Calcineurin A alpha, catalytic subunit of calcium/calmodulin regulated protein phosphatase, regulates activity of transcription factors involved in signal transduction and growth control</p>                                                                 |
| <p>PIR2:JC5938 thioredoxin-like protein - human [MASS=32251]/Thioredoxin-like 32, a thioredoxin related protein that has thioredoxin-like reducing activity</p>                                                                                                                                                                                                                                                                                                                           |
| <p>SW:OGT1_HUMAN O15294 homo sapiens (human). udp-n-acetylglucosamine-peptide n-acetylglucosaminyltransferase 100 kda subunit (ec 2.4.1.-) (o-glcnac transferase p100 subunit). 5/2000 [MASS=103012]/O-linked N-acetylglucosamine transferase (UDP-N-acetylglucosamine:polypeptide-N-acetylglucosaminyltransferase), enzyme that functions in O-glycosylation, may be involved in insulin secretion and glucose homeostasis, may play a role in signal transduction</p>                   |
| <p>GP:AK001521_1 Homo sapiens cDNA FLJ10659 fis, clone NT2RP2006071; unnamed protein product. [MASS=36277]/Protein with unknown function, has high similarity to a region of APPL, an adaptor protein with a PH domain, a PTB domain and a leucine zipper motif, and which binds to AKT2 and PI3 kinase catalytic subunit p110alpha</p>                                                                                                                                                   |
| <p>SW:KG3B_HUMAN P49841 homo sapiens (human). glycogen synthase Kinase-3 beta (ec 2.7.1.37) (gsk-3 beta). 7/1999<br/> [MASS=46768]/Glycogen synthase kinase-3 beta, a serine threonine protein kinase that phosphorylates several cytoplasmic and nuclear proteins, involved in embryonic development, and may hyperphosphorylate tau (MAPT) in</p>                                                                                                                                       |
| <p>GP:D87116_1 Human mRNA for MAP kinase kinase 3b ,complete cds; MKK3b. [MASS=39318]/Mitogen activated protein kinase kinase 3, phosphorylates MAP kinase p38, involved in stress and inflammatory responses, senescence, and apoptosis, also has roles in ischemic kidney injury, and H. influenzae infection</p>                                                                                                                                                                       |
| <p>SW:EBI2_HUMAN P32249 homo sapiens (human). ebv-induced g protein-coupled receptor 2 (ebi2). 7/1998<br/> [MASS=41224]/Epstein-Barr virus induced gene 2, a lymphocyte specific G protein-coupled receptor that may mediate the effects of Epstein-Barr virus on B lymphocytes</p>                                                                                                                                                                                                       |
| <p>SW:THIO_HUMAN P10599 homo sapiens (human). thioredoxin (atf-derived factor) (adf) (surface associated sulphhydryl protein) (sasp). 7/1998 [MASS=11606]/Thioredoxin, has dithiol-disulfide oxidoreductase activity and is upregulated in activated monocytes and in established dividing cell lines, promotes neutrophil migration</p>                                                                                                                                                  |
| <p>SW:OCRL_HUMAN Q01968 homo sapiens (human). lowe's oculocerebrorenal syndrome protein. 7/1998<br/> [MASS=111485]/Oculocerebrorenal syndrome of Lowe, phosphatidylinositol-4,5-bisphosphate 5-phosphatase, may play a role in intracellular protein trafficking; mutation of the corresponding gene causes Lowe oculocerebrorenal syndrome</p>                                                                                                                                           |
| <p>PIR2:I38026 MLN 62 protein - human [MASS=53444]/TNF receptor-associated factor 4, a member of a family of proteins that interact with the cytoplasmic domain of TNF receptors, plays a role in apoptosis, may function in TNF-related signal transduction associated with breast cancer</p>                                                                                                                                                                                            |
| <p>SW:GBLP_HUMAN P25388 homo sapiens (human), mus musculus (mouse), rattus norvegicus (rat), sus scrofa (pig), and gallus gallus guanine nucleotide-binding protein beta subunit-like protein 12.3 (p205) (re [MASS=35077]/Guanine nucleotide binding protein beta 2 related sequence 1, protein kinase C (PKC) anchoring system subunit, homologous to G protein beta subunits, deficit is associated with impaired activation of PKC in the aging brain, contributing to Alzheimers</p> |
| <p>GP:AB033078_1 Homo sapiens mRNA for KIAA1252 protein, partial cds; Start codon is not identified..<br/> [MASS=64962]/Protein with strong similarity to sphingosine phosphate lyase 1 (mouse Sgpl1), which is a member of the carbon-carbon lyase subclass of aldehyde-lyases that catalyzes cleavage of sphingosine phosphate and is involved in proliferative signal transduction</p>                                                                                                 |
| <p>SW:RSP4_HUMAN P08865 homo sapiens (human). 40s ribosomal protein sa (p40) (34/67 kda laminin receptor) (colon carcinoma laminin-binding protein) (nem/1chd4). 5/2000 [MASS=32854]/Laminin receptor 1, a ribosomal protein of the small 40S ribosomal subunit, plays a role in cancer cell and basement membrane glycoprotein laminin interactions during tumor invasion and metastasis, expression correlates with cancer cell aggressiveness</p>                                      |
| <p>SW:OBRG_HUMAN O15243 homo sapiens (human). leptin receptor gene-related protein (ob-r gene related protein) (ob-rgrp). 7/1999 [MASS=14254]/Leptin receptor, member of the gp130 (IL6ST) cytokine-receptor family, signals through the JAK/STAT cascade and functions in regulation of appetite, body fat, bone formation, and reproduction; mutations in the gene cause obesity and pituitary dysfunction</p>                                                                          |
| <p>SW:PTPF_HUMAN P10586 homo sapiens (human). lar protein precursor (leukocyte antigen related) (ec 3.1.3.48). 10/1994<br/> [MASS=211845]/Protein tyrosine phosphatase receptor-type F (leukocyte common antigen related), regulates insulin receptor signaling and cell migration, inhibits tumor formation in nude mice</p>                                                                                                                                                             |
| <p>SW:GBI1_HUMAN P04898 homo sapiens (human), and bos taurus (bovine). guanine nucleotide-binding protein g(i), alpha-1 subunit (adenylate cyclase-inhibiting g alpha protein). 7/1999 [MASS=40230]/Guanine nucleotide binding protein alpha inhibiting activity polypeptide 1 (Gi alpha 1), pertussis toxin-sensitive heterotrimeric G protein subunit downregulated at the membrane by increased cholesterol, mediates adenylyl cyclase inhibition</p>                                  |

|                                                                                                                                                                                                                                                                                                                                                                                                                                                                                                                                                                       |
|-----------------------------------------------------------------------------------------------------------------------------------------------------------------------------------------------------------------------------------------------------------------------------------------------------------------------------------------------------------------------------------------------------------------------------------------------------------------------------------------------------------------------------------------------------------------------|
| SW:C166_HUMAN Q13740 homo sapiens (human). cd166 antigen precursor (activated leukocyte-cell adhesion molecule) (alcam). 7/1999 [MASS=65132]/Activated leukocyte cell adhesion molecule, an immunoglobulin superfamily member and ligand for CD6, involved in hematopoietic cell adhesion, may play a role in osteogenesis, marker for tumor progression in malignant melanoma                                                                                                                                                                                        |
| SW:PTK7_HUMAN Q13308 homo sapiens (human). tyrosine-protein kinase-like 7 precursor (colon carcinoma kinase-4) (cck-4). 5/2000 [MASS=18260]/Protein tyrosine kinase 7 (colon carcinoma kinase-4), a glycosylated member of the receptor protein tyrosine kinase family that may be involved in tumorigenesis, likely to be catalytically inactive due to alterations within the RTK consensus sequences                                                                                                                                                               |
| GP:U17032_1 Human p190-B (p190-B) mRNA, complete cds; member of the Rho GAP family. [MASS=171569]/Rho GTPase activating protein 5/Rho GTPase-activating protein (GAP) 5, has GAP activity for ARHA, RAC1 and CDC42, which are ras-related GTP binding proteins of the rho subfamily; may be involved in the integrin receptor signaling pathway and in cell adhesion                                                                                                                                                                                                  |
| SW:CAN1_HUMAN P07384 homo sapiens (human). calpain 1, large [catalytic] subunit (ec 3.4.22.17) (calcium-activated neutral proteinase) (canp) (mu-type). 10/1996 [MASS=81890]/Calpain I, catalytic subunit of mu-calpain, a calcium-dependent cysteine (thiol) protease that requires micromolar concentrations of calcium in vitro                                                                                                                                                                                                                                    |
| SW:ITB1_HUMAN P05556 homo sapiens (human). fibronectin receptor beta subunit precursor (integrin beta-1) (cd29) (integrin via-4 beta subunit). 7/1999 [MASS=88465]/Integrin beta 1, involved in extracellular matrix interactions and signal transduction, plays roles in cell adhesion, migration, proliferation and development, may be involved in tumor metastasis                                                                                                                                                                                                |
| GP:AB007867_1 Homo sapiens KIAA0407 mRNA, complete cds. [MASS=232298]/Plexin B1 (plexin 5), a member of the plexin family of semaphorin receptors which are involved in axon guidance, receptor for semaphorin 4D (SEMA4D), functions in RAC and RHO signal transduction pathways and in actin cytoskeleton reorganization                                                                                                                                                                                                                                            |
| GP:AL023805_1 Human DNA sequence from clone RP4-811H13 on chromosome 20p12. Contains part of the PLCB4 gene for Phospholipase C beta 4, STSs, GSSs and a CpG island, complete sequence; combines with dJ1119D9.2.1 and .2 in Em:AL031652 to form isoforms 5 and 6; may a [MASS=61433]/1-phosphatidylinositol-4,5-bisphosphate phosphodiesterase beta 4/Phospholipase C beta 4, member of a G protein-regulated family of phospholipases that hydrolyze phosphatidylinositol 4,5-bisphosphate to the second messengers inositol 1,4,5-trisphosphate and diacylglycerol |
| Homo sapiens pleiotropic regulator 1 (PLRG1) mRNA/Member of the WD repeat protein family, interacts with a nuclear protein kinase C-beta II isoenzyme that is involved in insulin signaling                                                                                                                                                                                                                                                                                                                                                                           |
| SW:KC2B_HUMAN P13862 homo sapiens (human), mus musculus (mouse), rattus norvegicus (rat), bos taurus (bovine), sus scrofa (pig), oryctolagus cuniculus (rabbit), and gallus gallus (chicken). casein kinase [MASS=24942]/Casein kinase II beta subunit, regulatory subunit of casein kinase II (CK2), confers stability and specificity to CK2 catalytic subunits, may mediate formation of the tetrameric CK2 complex, and may be involved in heat stress response                                                                                                   |
| SW:NRP_HUMAN O14786 homo sapiens (human). neuropilin precursor (vascular endothelial cell growth factor 165 receptor). 5/2000 [MASS=103121]/Neuropilin 1, a receptor for VEGF (165) and the axonal chemorepellent Semaphorin III, involved in organogenesis, axon guidance and angiogenesis, may regulate cell proliferation and response to wounding, upregulated in neuroblastoma vascular endothelium                                                                                                                                                              |
| GP:X92689_1 Homo sapiens mRNA for UDP-GalNAc:polypeptide N-acetylgalactosaminyl transferase (GalNAc-T3). [MASS=72638]/N-acetylgalactosaminyltransferase T3 (UDP-N-acetyl-alpha-D-galactosamine:polypeptide N-acetylgalactosaminyltransferase 3), enzyme that initiates O-glycosylation; elevated levels may be associated with differentiation of adenocarcinomas                                                                                                                                                                                                     |
| SW:GST3_HUMAN O14880 homo sapiens (human). microsomal glutathione s-transferase 3 (ec 2.5.1.18) (microsomal gst- 3) (microsomal gst-iii). 5/2000 [MASS=16516]/Microsomal glutathione S-transferase 3, a microsomal membrane protein that has glutathione-dependent transferase and peroxidase activities, member of a family that includes 5-lipoxygenase activating protein (ALOX5AP) and leukotriene-C4 synthase (LTC4S)                                                                                                                                            |
| SW:POR1_HUMAN P21796 homo sapiens (human). voltage-dependent anion-selective channel protein 1 (hvdac1) (outer mitochondrial membrane protein porin 1) (plasmalemmal porin) (porin 31hl) (porin 31hm). 5/2 [MASS=30641]/Voltage-dependent anion channel 1, mitochondrial outer membrane anion channel that mediates apoptotic signals from Bcl-2 (BCL2) and related proteins; deficiency of protein in skeletal muscle causes mitochondrial encephalomyopathy                                                                                                         |
| SW:MAZ_HUMAN P56270 homo sapiens (human). myc-associated zinc finger protein (mazi) (purine-binding transcription factor) (pur-1) (zf87) (zif87). 7/1999 [MASS=48608]/MYC-associated zinc finger protein (purine-binding transcription factor), functions both as a positive and a negative regulator of gene expression and may also have roles in initiating and terminating transcription                                                                                                                                                                          |
| SW:IBP2_HUMAN P18065 homo sapiens (human). insulin-like growth factor binding protein 2 precursor (igfbp-2) (ibp-2) (igf-binding protein 2). 12/1998 [MASS=35138]/Insulin like growth factor binding protein 2, binds to and modulates insulin-like growth factor activity, regulates cell proliferation, may be involved in apoptosis; associated with the malignant phenotype, may play a role in prostatic involution                                                                                                                                              |
| SW:GRBA_HUMAN Q13322 homo sapiens (human). growth factor receptor-bound protein 10 (grb10 adaptor protein) (insulin receptor binding protein grb-ir) (kiaa0207). 5/2000 [MASS=67231]/Growth factor receptor bound protein 10, an adaptor protein with PH and SH2 domains that binds to various receptor and cytosolic kinases and may mediate growth factor and Src family kinase signaling; variants may be associated with Russell-Silver Syndrome                                                                                                                  |



|                                                                                                                                                                                                                                                                                                                                                                                                                                                                                                                                                                                                                                                      |
|------------------------------------------------------------------------------------------------------------------------------------------------------------------------------------------------------------------------------------------------------------------------------------------------------------------------------------------------------------------------------------------------------------------------------------------------------------------------------------------------------------------------------------------------------------------------------------------------------------------------------------------------------|
| SW:SORC_HUMAN P30626 homo sapiens (human). sorcin (22 kda protein) (cp-22) (v19). 11/1997 [MASS=21676]/Sorcin, an EF-hand calcium-binding protein, may be involved in multidrug resistance, a potential modulator of intracellular calcium levels through interaction with the ryanodine receptor                                                                                                                                                                                                                                                                                                                                                    |
| SW:LU_HUMAN P50895 homo sapiens (human). lutheran blood group glycoprotein precursor (b-cam cell surface glycoprotein) (auberger b antigen) (f8/g253 antigen). 11/1997 [MASS=67375]/Precursor of Lutheran blood group glycoprotein and B-CAM, laminin receptors and cell adhesion molecules, have a role in the blood-brain barrier, contribute to vasoocclusion in sickle cell disease and possibly tumorigenesis                                                                                                                                                                                                                                   |
| GP:D63481_1 Human mRNA for KIAA0147 gene, partial cds; The KIAA0147 gene product is related to adenylyl cyclase.. [MASS=166187]/Protein containing PDZ (DHR, GLGF) domains, which target signaling proteins to membranes, contains leucine rich repeats, which mediate protein-protein interactions                                                                                                                                                                                                                                                                                                                                                  |
| GP:AB006537_1 Homo sapiens mRNA for interleukin 1 receptor accessory protein, complete cds. [MASS=65418]/Interleukin-1 receptor accessory protein, a subunit of the interleukin-1 receptor complex, recruits IRAK to the receptor complex in an early stage of interleukin-1 signaling                                                                                                                                                                                                                                                                                                                                                               |
| GP:AF002668_1 Homo sapiens putative fatty acid desaturase MLD mRNA, complete cds; putative fatty acid desaturase. [MASS=37866]/Degenerative spermatocyte homolog (Drosophila), member of the membrane fatty acid desaturase family, regulates the biosynthesis of the epidermal growth factor receptor (EGFR)                                                                                                                                                                                                                                                                                                                                        |
| SW:RDC1_HUMAN P25106 homo sapiens (human). g protein-coupled receptor rdc1 homolog. 7/1998 [MASS=41474]/Chemokine orphan receptor 1, protein with strong similarity to murine Rdc1, which is a member of the G protein-coupled receptor family and related to chemokine receptors of the CXC family, acts as a coreceptor for HIV strains that infect brain cells                                                                                                                                                                                                                                                                                    |
| SW:PA2M_HUMAN P14555 homo sapiens (human). phospholipase a2, membrane associated precursor (ec 3.1.1.4) (phosphatidylcholine 2-acylhydrolase) (group ii phospholipase a2) (non-pancreatic secretory phosph [MASS=16083]/Group IIA phospholipase A2, a secreted member of the phospholipase A2 family that hydrolyzes the phospholipid sn-2 ester bond, plays roles in phospholipid metabolism, host defense, and inflammation; gene loss reported in a sporadic colorectal tumor                                                                                                                                                                     |
| SW:KDGG_HUMAN P49619 homo sapiens (human). diacylglycerol kinase, gamma (ec 2.7.1.107) (diglyceride kinase) (dkg-gamma) (dag kinase gamma). 5/2000 [MASS=88997]/Diacylglycerol kinase gamma, member of diacylglycerol kinase family, contains EF-hand motifs, zinc finger and ATP-binding site, converts diacylglycerol to phosphatidic acid in a phosphatidylserine-dependent manner, may regulate phospholipid turnover                                                                                                                                                                                                                            |
| SW:TRFL_HUMAN P02788 homo sapiens (human). lactotransferrin precursor (lactoferrin). 7/1999 [MASS=78338]/Lactotransferrin, a member of the transferrin family, transports iron in extracellular fluid and may have serine protease activity, has antimicrobial, antifungal, and antiviral activity, potential therapeutic or diagnostic target for autoimmune diseases                                                                                                                                                                                                                                                                               |
| SW:FLOH_HUMAN O60779 homo sapiens (human). folate-like transporter dj206d15.1 on chromosome 1 (fragment). 7/1999 [MASS=52323]/Solute carrier family 19 member 2, functions as a thiamine transporter; mutations in the gene are associated with thiamine responsive megaloblastic anemia (TRMA) often combined with diabetes mellitus and deafness                                                                                                                                                                                                                                                                                                   |
| SW:Y274_HUMAN Q92562 homo sapiens (human). hypothetical protein kiaa0274. 7/1998 [MASS=103635]/Protein containing two SacI homology domains, has a region of low similarity to suppressor of actin 1 (rat Sacm1l), which is an integral membrane lipid phosphatase that acts on PI 3 phosphate, PI 4 phosphate, and PI 3,5 bisphosphate                                                                                                                                                                                                                                                                                                              |
| Solute carrier family 9 isoform 3 regulatory factor 1 (sodium-hydrogen exchanger-regulatory factor), a cytoskeleton-linking protein that forms multiprotein complexes with members of the Ezrin-Radixin-Moesin family via two PDZ domains                                                                                                                                                                                                                                                                                                                                                                                                            |
| SW:AAAT_HUMAN Q15758 homo sapiens (human). neutral amino acid transporter b(0) (atb(0)). 12/1998 [MASS=56621]/Solute carrier family 1 member 5, a sodium-dependent neutral amino acid transporter that comprises the amino acid transport system B(0), acts as a cell-surface receptor for RD114/simian type D                                                                                                                                                                                                                                                                                                                                       |
| SW:ATND_HUMAN P54709 homo sapiens (human). sodium/potassium-transporting atpase beta-3 chain (sodium/potassium-dependent atpase beta-3 subunit) (atpb-3). 7/1999 [MASS=31513]/ATPase (Na <sup>+</sup> /K <sup>+</sup> transporting beta 3 subunit), proposed to actively transport sodium and potassium across the cell membrane to produce electrochemical gradients                                                                                                                                                                                                                                                                                |
| SW:MRP1_HUMAN P33527 homo sapiens (human). multidrug resistance-associated protein 1. 5/2000 [MASS=171561]/ATP-binding cassette subfamily C member 1 (multiple drug resistance protein 1), an ATP-binding cassette transporter that acts as a multidrug efflux pump conferring resistance to lipophilic drugs and chemotherapeutic agents                                                                                                                                                                                                                                                                                                            |
| SW:NC5R_HUMAN P00387 homo sapiens (human). nadh-cytochrome b5 reductase (ec 1.6.2.2) (b5r). 11/1997 [MASS=34104]/NADH-dependent cytochrome b5 reductase (diaphorase), soluble erythrocyte-specific form functions in methemoglobin reduction, ubiquitous membrane-bound form functions in lipid metabolism; mutations in the gene cause methemoglobinemia types I and II                                                                                                                                                                                                                                                                             |
| SW:MRP4_HUMAN O15439 homo sapiens (human). multidrug resistance-associated protein 4 (fragment). 5/2000 [MASS=18448]/Multidrug resistance protein 4, a member of the ATP-binding cassette transporter superfamily, transports cAMP, cGMP, and estradiol 17-beta-D-glucuronide, acts as a multidrug efflux pump, may be involved in cellular detoxification and xenobiotic resistance/Multidrug resistance protein 4, a member of the ATP-binding cassette transporter superfamily, transports cAMP, cGMP, and estradiol 17-beta-D-glucuronide, acts as a multidrug efflux pump, may be involved in cellular detoxification and xenobiotic resistance |

|                                                                                                                                                                                                                                                                                                                                                                                                                                                                                      |
|--------------------------------------------------------------------------------------------------------------------------------------------------------------------------------------------------------------------------------------------------------------------------------------------------------------------------------------------------------------------------------------------------------------------------------------------------------------------------------------|
| SW:CL11_HUMAN O00299 homo sapiens (human). chloride intracellular channel protein 1 (nuclear chloride ion channel 27) (ncc27) (p64 clcp). 5/2000 [MASS=26924]/Chloride intracellular channel 1 (nuclear chloride channel-27), an intracellular chloride channel that localizes predominantly to the nucleus, member of the glutathione transferase structural family                                                                                                                 |
| SW:GBAK_HUMAN P08754 homo sapiens (human). guanine nucleotide-binding protein g(k), alpha subunit (g(i) alpha-3). 11/1997 [MASS=40401]/G protein alpha i3 subunit, a component of pertussis toxin sensitive heterotrimeric G protein complexes, transduces signals from G protein-coupled receptors to intracellular effectors, inhibits forskolin-stimulated cAMP production                                                                                                        |
| SW:ATHA_HUMAN P20648 homo sapiens (human). potassium-transporting atpase alpha chain (ec 3.6.1.36) (proton pump) (gastric h+/k+ atpase alpha subunit). 5/2000 [MASS=114091]/H+/K+ transporting ATPase alpha polypeptide, a putative gastric heterodimeric proton pump responsible for acidification of the stomach lumen                                                                                                                                                             |
| SWN:ENT1_HUMAN Q99808 homo sapiens (human). equilibrative nucleoside transporter 1 (equilibrative nitrobenzylmercaptapurine riboside-sensitive nucleoside transporter) (equilibrative nbmpr-sensitive nucle [MASS=50088]/Solute carrier family 29 member 1 (equilibrative nucleoside transporter 1), functions in the transport of physiologic nucleosides and chemotherapeutic nucleoside analog drugs, inhibited by nitrobenzylthioinosine, dipyrindamole, and dilazep             |
| SW:ANX7_HUMAN P20073 homo sapiens (human). annexin vii (synexin). 5/2000 [MASS=50316]/Annexin A7 (synexin), a calcium-dependent GTPase that acts as a voltage-dependent calcium channel, interaction with galectin 3 (LGALS3) suggests roles in apoptosis and exocytosis, may function as a tumor suppressor                                                                                                                                                                         |
| PIR2:T46412 ubiquitin--protein ligase (EC 6.3.2.19) NEDD4 - human (fragment) [MASS=95283]/Neural cell precursor expressed developmentally downregulated 4, ubiquitin-protein ligase with multiple WW domains, binds to and reduces the activity of epithelial sodium channels, may play a role in neural differentiation, regulated by kinase SGK                                                                                                                                    |
| SW:VATX_HUMAN Q02547 homo sapiens (human). vacuolar atp synthase subunit ac39 (ec 3.6.1.34) (v-atpase ac39 subunit) (32 kda accessory protein) (p39). 11/1997 [MASS=31704]/Vacuolar H+-ATPase proton pump (subunit D), an accessory subunit in the peripheral catalytic V1 complex, may be involved in coupling ATP hydrolysis (V1 complex) and proton transport (V0 complex)                                                                                                        |
| SW:VPP1_HUMAN Q93050 homo sapiens (human). clathrin-coated vesicle/synaptic vesicle proton pump 116 kda subunit (ec 3.6.1.34) (vacuolar proton pump subunit 1). 12/1998 [MASS=95751]/ATPase (H+ transporting lysosomal (vacuolar proton pump) noncatalytic accessory protein 1A (110/116 kDa), a component of a multisubunit enzyme which couples ATP hydrolysis to proton translocation                                                                                             |
| GP:AF284422_1 Homo sapiens cation-chloride cotransporter-interacting protein mRNA, complete cds; cation-chloride cotransporter family; CIP1; 96.2 kDa; predicted to contain 12 transmembrane domains and cytoplasmic N- and C-termini. [MASS=96171]/Cation-chloride cotransporter-interacting protein 1, inhibits Na+-K+-Cl- cotransporter 1-mediated transport activity, may modulate cation-chloride cotransporter activity or kinetics through heterodimer formation              |
| SW:MOT4_HUMAN O15374 homo sapiens (human). monocarboxylate transporter 4 (mct 4). 5/2000 [MASS=54022]/Monocarboxylate transporter, member of a family of proton-linked monocarboxylate transporters, may transport monocarboxylates such as lactate across the plasma membrane                                                                                                                                                                                                       |
| SWN:STX8_HUMAN Q9unk0 homo sapiens (human). syntaxin 8. 8/2001 [MASS=26907]/Syntaxin 8, member of the soluble NSF attachment protein receptor (SNARE) family, plays a role in endosome trafficking, may mediate vesicle docking and fusion, may regulate CFTR -mediated chloride currents                                                                                                                                                                                            |
| GP:AK022853_1 Homo sapiens cDNA FLJ12791 fis, clone NT2RP2001991, highly similar to SODIUM- AND CHLORIDE-DEPENDENT TRANSPORTER NTTT73; unnamed protein product. [MASS=32264]/Orphan transporter V7-3, a member of the sodium:neurotransmitter symporter family with an unknown substrate specificity, predominantly expressed in neuronal tissues                                                                                                                                    |
| SW:ICLN_HUMAN P54105 homo sapiens (human). chloride conductance regulatory protein icln (chloride channel, nucleotide sensitive 1a) (chloride ion current inducer protein) (clci) (reticulocyte picln). 12 [MASS=26215]/Chloride channel nucleotide-sensitive 1A, a putative chloride channel regulator, binds beta-actin, may regulate chloride transport and cell volume (especially in young red blood cells), may play a role in aqueous humor formation in the eye              |
| SW:MK01_HUMAN P28482 homo sapiens (human). mitogen-activated protein kinase 1 (ec 2.7.1.-) (extracellular signal-regulated kinase 2) (erk2) (mitogen-activated protein kinase 2) (map kinase 2) (mapk 2) [MASS=41390]/Mitogen-activated protein kinase 1, a serine-threonine kinase effector of the RAS-MAP kinase pathway, translocates to the nucleus to mediate transcription when activated, involved in the regulation of cell growth, differentiation, migration and apoptosis |
| SW:IEFS_HUMAN P31948 homo sapiens (human). transformation-sensitive protein ief ssp 3521. 10/1996 [MASS=62639]/Stress-induced phosphoprotein 1, a cochaperone that inhibits protein folding and may stabilize a heat shock protein complex on the lysosomal membrane, contains nine TPR (tetratricopeptide repeat) domains, which may mediate protein-protein interactions                                                                                                           |
| GP:AJ131612_1 Homo sapiens dic gene, exons 1-11. [MASS=31325]/Solute carrier family 25 member 10 (dicarboxylate carrier), a putative dicarboxylic acid transporter predicted to reside in the inner mitochondrial membrane, may be involved in gluconeogenesis                                                                                                                                                                                                                       |
| GP:AF288687_1 Homo sapiens CGI-152 protein mRNA, complete cds. [MASS=121110]/Member of the haloacid dehalogenase or epoxide hydrolase family and the E1-E2 (P-type) ATPase family, which are cation transporters, has moderate similarity to <i>S. cerevisiae</i> Spf1p, which functions in cell wall organization and xenobiotic response                                                                                                                                           |

|                                                                                                                                                                                                                                                                                                                                                                                                                                                                                                                                    |
|------------------------------------------------------------------------------------------------------------------------------------------------------------------------------------------------------------------------------------------------------------------------------------------------------------------------------------------------------------------------------------------------------------------------------------------------------------------------------------------------------------------------------------|
| <p>SW:CLC3_HUMAN P51790 homo sapiens (human). chloride channel protein 3 (clc-3). 7/1998 [MASS=84793]/Chloride channel 3, chloride channel of the voltage-gated family, plays a role in chloride transport, may be responsible for outwardly rectifying chloride currents, regulated by calcium/calmodulin dependent protein kinase II (CAMK2A), binds to SLC9A3R1</p>                                                                                                                                                             |
| <p>SW:ATN1_HUMAN P05023 homo sapiens (human). sodium/potassium-transporting atpase alpha-1 chain precursor (ec 3.6.1.37) (sodium pump) (na+/k+ atpase). 7/1999 [MASS=112896]/Alpha 1 subunit of the Na+-K+-transporting ATPase, required for active transport of sodium in the kidney and other tissues, may function in blood pressure regulation; mutations may be associated with essential hypertension and diabetic neuropathy</p>                                                                                            |
| <p>GP:U81006_1 Human p76 mRNA, complete cds; predicted molecular weight is 76kD; contains nine potential membrane spanning domains; similar to yeast p24a precursor protein encoded by GenBank Accession Number X67316. [MASS=75776]/Transmembrane 9 superfamily member 2, an endosomal protein with membrane spanning domains, may be a channel or transporter of small molecules</p>                                                                                                                                             |
| <p>SW:CPT2_HUMAN P23786 homo sapiens (human). carnitine o-palmitoyltransferase ii, mitochondrial precursor (ec 2.3.1.21) (cpt ii). 5/2000 [MASS=73777]/Carnitine palmitoyltransferase II, a mitochondrial long-chain fatty acid oxidation enzyme; mutations are associated with a lipid metabolism disorder that includes recurrent myopathy with progressive rhabdomyolysis, muscle weakness and myoglobinuria</p>                                                                                                                |
| <p>SW:ATCS_HUMAN P23634 homo sapiens (human). calcium-transporting atpase plasma membrane, isoform 4 (ec 3.6.1.38) (calcium pump) (pmca4). 5/2000 [MASS=133931]/ATPase Ca++ transporting plasma membrane 4, a calcium pump that regulates levels of cytosolic free Ca2+, binds calmodulin</p>                                                                                                                                                                                                                                      |
| <p>SW:HBP_HUMAN Q00341 homo sapiens (human). high density lipoprotein binding protein (hdl-binding protein). 12/1998 [MASS=141440]/High density lipoprotein binding protein, binds and inhibits cleavage of the 3' UTR of vitellogenin mRNA, binds and promotes nuclear export of tRNA, binds high density lipoproteins and may have roles in cholesterol metabolism and atherogenesis</p>                                                                                                                                         |
| <p>SW:ATHL_HUMAN P54707 homo sapiens (human). potassium-transporting atpase alpha-like chain (ec 3.6.1.36) (proton pump) (non-gastric h+/k+ atpase alpha subunit). 5/2000 [MASS=115511]/Alpha subunit of non-gastric H,K ATPase, the catalytic subunit of the non-gastric nongastric hydrogen:potassium-exchanging ATPase, likely mediates Na+,K+ exchange, activity is pH dependent and sensitive to inhibition by ouabain and vanadate</p>                                                                                       |
| <p>SW:NPC1_HUMAN O15118 homo sapiens (human). niemann-pick c1 protein precursor. 5/2000 [MASS=142149]/Niemann-Pick disease type C1, a lysosomal sterol transporter involved in cholesterol metabolism; mutation of the corresponding gene causes Niemann-Pick type C1 disease and mutation of mouse Npc1 causes a disease like Niemann-Pick type C1 disease</p>                                                                                                                                                                    |
| <p>SW:COXS_HUMAN Q14061 homo sapiens (human). cytochrome c oxidase copper chaperone. 7/1999 [MASS=6784]/Cytochrome c oxidase assembly protein 17, a putative copper binding protein, may function to transport copper to mitochondria for assembly into cytochrome oxidase complex; mutation does not appear to be a common cause of COX deficiency disorders</p>                                                                                                                                                                  |
| <p>SW:VAB1_HUMAN P15313 homo sapiens (human). vacuolar atp synthase subunit b, kidney isoform (ec 3.6.1.34) (endomembrane proton pump 58 kda subunit) (v-atpase b subunit). 5/2000 [MASS=56980]/Vacuolar H+-ATPase proton pump (B1 kidney isoform of the B subunit), mediates distal nephron acid secretion and the interaction between V-ATPase and F-actin; variants are associated with renal tubular acidosis accompanied with sensorineural deafness</p>                                                                      |
| <p>SW:TRSR_HUMAN P02786 homo sapiens (human). transferrin receptor protein (tr) (antigen cd71) (t9) (p90). 7/1999 [MASS=84901]/Transferrin receptor, binds and internalizes the iron carrier transferrin, involved in iron homeostasis, important for neurologic development and likely erythropoiesis, expression is deregulated in anemia, hemochromatosis, and Friedreich's ataxia</p>                                                                                                                                          |
| <p>SW:ATC2_HUMAN P16615 h sarcoplasmic/endoplasmic reticulum calcium atpase isoform 2 (ec 3.6.1.38) (calcium pump 2) (serca2) (sr ca(2+)-atpase 2) (calcium-transporting atpase sarcoplasmic reticulum type, [MASS=114757]/Sarcoplasmic reticulum Ca2+-ATPase 2 (slow twitch muscle, cardiac, and nonmuscle form), pumps calcium from the cytoplasm to the ER; reduced activity in the heart is implicated in dilated cardiomyopathy and gene mutations are associated with Darier disease</p>                                     |
| <p>SW:SAP_HUMAN P07602 h proactivator polypeptide precursor [contains: saposin a (protein a); saposin b (sphingolipid activator protein 1) (sap-1) (dispersin) (sulfatide/gm1 activator); saposin c (co-beta- [MASS=58113]/Prosaposin, precursor of saposins A, B, C, and D which transport gangliosides and activate sphingolipid hydrolysis, stimulates neurite growth and inhibits apoptosis; variants are associated with metachromatic leukodystrophy and Gaucher disease</p>                                                 |
| <p>GP:AF149418_1 Oryctolagus cuniculus duodenal sodium bicarbonate cotransport protein NBC1 mRNA, complete cds; transmembrane protein; belongs to the functional superfamily of HCO3- transporters; similar to human and mouse pancreatic NBC1 proteins. [MASS=121427]/Solute carrier family 4 (sodium bicarbonate cotransporter) member 4, acts in cellular pH regulation and maintenance of cornea and lens transparency and intraocular pressure; mutations cause proximal renal tubular acidosis with ocular abnormalities</p> |
| <p>SW:TXTP_HUMAN P53007 homo sapiens (human). tricarboxylate transport protein precursor (citrate transport protein) (ctp) (tricarboxylate carrier protein). 5/2000 [MASS=34085]/Solute carrier family 25 (mitochondrial carrier citrate transporter) member 1, a putative mitochondrial membrane citrate transporter; gene is localized to a region deleted in DiGeorge/velocardiofacial syndromes</p>                                                                                                                            |
| <p>SW:ATNB_HUMAN P05026 homo sapiens (human). sodium/potassium-transporting atpase beta-1 chain (sodium/potassium-dependent atpase beta-1 subunit). 7/1999 [MASS=35061]/Beta 1 subunit of Na+:K+-ATPase, a putative sodium:potassium-exchanging ATPase</p>                                                                                                                                                                                                                                                                         |

|                                                                                                                                                                                                                                                                                                                                                                                                                                                                                   |
|-----------------------------------------------------------------------------------------------------------------------------------------------------------------------------------------------------------------------------------------------------------------------------------------------------------------------------------------------------------------------------------------------------------------------------------------------------------------------------------|
| <p>SW:VAB2_HUMAN P21281 homo sapiens (human). vacuolar atp synthase subunit b, brain isoform (ec 3.6.1.34) (endomembrane proton pump 58 kda subunit) (v-atpase b subunit) (ho57). 7/1999 [MASS=56517]/Vacuolar-type H(+)-ATPase (beta isoform 2), 56 kDa subunit of the ATPase catalytic domain which may assist in transepithelial H+ transport in the kidney, may effect vacuolar acidification, and may play a role in the polarization of osteoclasts</p>                     |
| <p>SW:NLTP_HUMAN P22307 homo sapiens (human). nonspecific lipid-transfer protein precursor (nsl-tp) (sterol carrier protein 2) (scp-2) (sterol carrier protein x) (scp-x) (scpx). 5/2000 [MASS=58994]/Sterol carrier protein 2, catalyzes the exchange of phospholipids between membranes, stimulates cholesterol metabolism and may regulate steroidogenesis; alternative form, SCPX, is a 3 oxoacyl CoA thiolase</p>                                                            |
| <p>SW:ATCP_HUMAN P20020 homo sapiens (human). calcium-transporting atpase plasma membrane, isoform 1b (ec 3.6.1.38) (calcium pump) (pmca1b). 5/2000 [MASS=134685]/ATPase Ca<sup>++</sup> transporting plasma membrane 1, a member of the P type primary ion transport ATPase family, a housekeeping gene, alternatively spliced isoforms show differential tissue expression; candidate gene for hereditary hearing impairment</p>                                                |
| <p>SW:ADT1_HUMAN P12235 homo sapiens (human). adp,atp carrier protein, heart/skeletal muscle isoform t1 (adp/atp translocase 1) (adenine nucleotide translocator 1) (ant 1). 10/1994 [MASS=33064]/Solute carrier family 25 member 4, an ADP:ATP transporter that may act in mitochondrial genome stability, altered transport capacity due to autoimmune response leads to myocarditis and cardiomyopathy; mutation causes progressive external ophthalmoplegia</p>               |
| <p>SW:ECHB_HUMAN P55084 homo sapiens (human). trifunctional enzyme beta subunit, mitochondrial precursor (tp-beta) [includes: 3-ketoacyl-coa thiolase (ec 2.3.1.16) (acetyl-coa acyltransferase) (beta-ketothi [MASS=51294]/3-hydroxyacyl-CoA dehydrogenase, 3-ketoacyl-CoA thiolase trifunctional protein beta subunit, involved in fatty acid beta-oxidation; variants are associated with trifunctional protein deficiency, sudden infant death syndrome and liver failure</p> |
| <p>SW:ECHA_HUMAN P40939 homo sapiens (human). mitochondrial trifunctional enzyme alpha subunit precursor (tp-alpha) [includes: long-chain enoyl-coa hydratase (ec 4.2.1.17); long chain 3-hydroxyacyl-coa deh [MASS=82960]/Mitochondrial long-chain enoyl-CoA hydratase/3-hydroxyacyl-CoA dehydrogenase/3-ketoacyl-CoA thiolase alpha subunit, involved in fatty acid beta-oxidation, mutations are associated with trifunctional protein deficiency and Reye-like syndrome</p>   |
| <p>SW:POR2_HUMAN P45880 homo sapiens (human). voltage-dependent anion-selective channel protein 2 (hvdac2) (outer mitochondrial membrane protein porin 2). 5/2000 [MASS=38093]/Voltage-dependent anion channel 2, a voltage-gated pore of the outer mitochondrial membrane, may bind hexokinase</p>                                                                                                                                                                               |
| <p>PIR2:B53737 phosphate carrier protein precursor, mitochondrial, splice form B - human [MASS=39959]/Mitochondrial phosphate carrier (solute carrier family 25 member 3), catalyzes the transport of phosphate from the cytoplasm to the mitochondrial matrix for ATP synthesis during oxidative phosphorylation</p>                                                                                                                                                             |
| <p>SW:ATPG_HUMAN P36542 homo sapiens (human). atp synthase gamma chain, mitochondrial precursor (ec 3.6.1.34). 5/2000 [MASS=32996]/ATP synthase H+ transporting mitochondrial F1 complex gamma 1, putative component of multisubunit enzyme that synthesizes ATP during oxidative phosphorylation, exists in tissue-specific alternative forms that are spliced in response to acidic conditions</p>                                                                              |
| <p>GP:AC002540_1 Human BAC clone GS1-25M2 from 7q21-q22, complete sequence; [MASS=25323]/Solute carrier family 25 member 13 (citrin), a calcium-dependent mitochondrial solute transporter that may play a role in urea cycle function; mutation of the corresponding gene result in neonatal:infantile and adult onset forms of type II citrullinemia</p>                                                                                                                        |
| <p>SW:POR1_HUMAN P21796 homo sapiens (human). voltage-dependent anion-selective channel protein 1 (hvdac1) (outer mitochondrial membrane protein porin 1) (plasmalemmal porin) (porin 31hl) (porin 31hm). 5/2 [MASS=30641]/Voltage-dependent anion channel 1, mitochondrial outer membrane anion channel that mediates apoptotic signals from Bcl-2 (BCL2) and related proteins; deficiency of protein in skeletal muscle causes mitochondrial encephalomyopathy</p>              |
| <p>SW:ATPA_HUMAN P25705 homo sapiens (human). atp synthase alpha chain, mitochondrial precursor (ec 3.6.1.34). 12/1998 [MASS=59751]/ATP synthase H+ transporting mitochondrial F1 complex alpha subunit isoform 1 cardiac muscle, part of the synthase enzymatic complex that catalyzes the synthesis of ATP during oxidative phosphorylation</p>                                                                                                                                 |
| <p>SWN:POR3_HUMAN Q9y277 homo sapiens (human). voltage-dependent anion-selective channel protein 3 (vdac-3) (hvdac3) (outer mitochondrial membrane protein porin 3). 8/2001 [MASS=30659]/Voltage-dependent anion channel 3, may function as a voltage-gated pore of the outer mitochondrial membrane that binds hexokinase and glycerol kinase and transports adenine nucleotides</p>                                                                                             |
| <p>SW:ADT2_HUMAN P05141 homo sapiens (human). adp,atp carrier protein, fibroblast isoform (adp/atp translocase 2) (adenine nucleotide translocator 2) (ant 2). 7/1999 [MASS=32895]/Solute carrier family 25 member 5 (adenine nucleotide translocator 2), may mediate the exchange of ADP and ATP between the cytosol and mitochondria, expression is altered in dilated cardiomyopathy</p>                                                                                       |
| <p>SW:ADT3_HUMAN P12236 homo sapiens (human). adp,atp carrier protein, liver isoform t2 (adp/atp translocase 3) (adenine nucleotide translocator 3) (ant 3). 11/1995 [MASS=32866]/Solute carrier family 25 member 6 (adenine nucleotide translocator), member of the ADP/ATP translocase family</p>                                                                                                                                                                               |
| <p>SW:ATCK_HUMAN P98194 homo sapiens (human). calcium-transporting atpase 2c1 (ec 3.6.1.38) (atp-dependent ca<sup>2+</sup> pump pmr1). 5/2000 [MASS=100606]/ATPase (Ca<sup>2+</sup> transporting) type 2c member 1, a Ca<sup>2+</sup>-transporting P-type ATPase involved in Ca<sup>2+</sup> homeostasis that may also may play a role in epidermal differentiation; mutations in the gene cause Hailey-Hailey disease, a blistering skin disease</p>                             |
| <p>SW:SORC_HUMAN P30626 homo sapiens (human). sorcin (22 kda protein) (cp-22) (v19). 11/1997 [MASS=21676]/Sorcin, an EF-hand calcium-binding protein, may be involved in multidrug resistance, a potential modulator of intracellular calcium levels through interaction with the ryanodine receptor</p>                                                                                                                                                                          |

|                                                                                                                                                                                                                                                                                                                                                                                                                                                   |
|---------------------------------------------------------------------------------------------------------------------------------------------------------------------------------------------------------------------------------------------------------------------------------------------------------------------------------------------------------------------------------------------------------------------------------------------------|
| SW:B3A2_HUMAN P04920 homo sapiens (human). anion exchange protein 2 (non-erythroid band 3-like protein) (bnd3l). 10/1996 [MASS=136814]/Solute carrier family 4 member 2 (anion exchanger 2), a chloride and bicarbonate exchanger that may play a role in pH regulation, binds ankyrin and links the basolateral membrane to the cytoskeleton                                                                                                     |
| SW:AT2A_HUMAN O75110 homo sapiens (human). potential phospholipid-transporting atpase iia (ec 3.6.1.-) (fragment). 5/2000 [MASS=116933]/Member of the haloacid dehalogenase or epoxide hydrolase family, has moderate similarity to S. cerevisiae Neo1p, which is an ATPase whose overproduction confers neomycin resistance                                                                                                                      |
| SW:SNAG_HUMAN Q99747 homo sapiens (human). gamma-soluble nsf attachment protein (snap-gamma). 7/1999 [MASS=34746]/N-ethylmaleimide-sensitive factor (NSF) attachment protein gamma, member of a family of proteins involved in membrane fusion during exocytosis, may have roles in platelet exocytosis and in the attachment of mitochondria to the cytoskeleton                                                                                 |
| sec24-related protein D (human)/Protein with high similarity to SEC24 (S. cerevisiae) related gene family member C (human SEC24C), which is a putative COPII vesicle coat protein that forms a complex with Sec23Ap (human SEC23) and functions in ER-Golgi transport                                                                                                                                                                             |
| SW:RB3B_HUMAN P20337 homo sapiens (human). ras-related protein rab-3b. 10/1994 [MASS=24760]/Ras-related GTP-binding protein 3b, a GTP-binding protein and GTPase that is involved in exocytosis                                                                                                                                                                                                                                                   |
| SW:ADG_HUMAN O43747 homo sapiens (human). gamma-adaptin (golgi adaptor ha1/ap1 adaptin gamma subunit) (clathrin assembly protein complex 1 gamma large chain). 7/1999 [MASS=91592]/Adaptor-related protein complex 1 gamma 1 subunit, promotes the formation of clathrin coated vesicles and pits for intracellular transport; deletion of the corresponding gene occurs in Wilm's tumor, prostate adenocarcinomas, and hepatocellular carcinomas |
| SW:LDLR_HUMAN P01130 homo sapiens (human). low-density lipoprotein receptor precursor (ldl receptor). 5/2000 [MASS=95376]/Low density lipoprotein receptor, mediates uptake of low density lipoproteins, involved in lipid metabolism; gene variations are associated with familial hypercholesterolemia, hypertension, atherosclerosis, and coronary artery disease                                                                              |
| SW:RB4A_HUMAN P20338 homo sapiens (human). ras-related protein rab-4a. 10/1996 [MASS=23902]/GTP-binding protein, a member of the rab family of proteins, involved in early endosome trafficking and receptor recycling                                                                                                                                                                                                                            |
| PIR2:A53016 myosin heavy chain VA - human (fragment) [MASS=96052]/Class V myosin (Myoxin), a member of the myosin family of proteins, a motor protein that may be involved in vesicle transport and epidermal differentiation; mutation of the corresponding gene is associated with Griscelli syndrome                                                                                                                                           |
| SW:EGFR_HUMAN P00533 homo sapiens (human). epidermal growth factor receptor precursor (ec 2.7.1.112). 12/1998 [MASS=134277]/Epidermal growth factor receptor, a receptor protein tyrosine kinase that binds epidermal growth factor (EGF) and transforming growth factor alpha (TGFA), involved in cell proliferation and differentiation, implicated in tumor invasion and metastasis                                                            |
| SW:STB3_HUMAN O00186 homo sapiens (human). syntaxin binding protein 3 (unc-18 homolog 3) (unc-18c) (unc-18-3). 5/2000 [MASS=67574]/Syntaxin binding protein 3, binds syntaxin 4 (STX4), predicted to be involved in vesicle transport and docking and in neurotransmitter release                                                                                                                                                                 |
| SW:CLH2_HUMAN P53675 homo sapiens (human). clathrin heavy chain 2 (clh-22). 5/2000 [MASS=187030]/Clathrin heavy polypeptide-like 1, may play roles in vesicle budding and in cytoskeleton-dependent trans-Golgi network membrane sorting; gene is among those deleted in velocardiofacial and DiGeorge syndromes, and is a fusion partner with ALK in lymphoma                                                                                    |
| SW:S23B_HUMAN Q15437 homo sapiens (human). protein transport protein sec23 homolog isoform b. 11/1997 [MASS=86470]/Member of the SEC23 family of vesicle trafficking proteins                                                                                                                                                                                                                                                                     |
| GP:AF038535_1 Homo sapiens synaptotagmin VII mRNA, partial cds; similar to rat synaptotagmin VII. [MASS=47195]/Very strongly similar to synaptotagmin 7 (Rn.10193); may be a phospholipid-binding calcium sensor protein                                                                                                                                                                                                                          |
| SW:KINH_HUMAN P33176 homo sapiens (human). kinesin heavy chain (ubiquitous kinesin heavy chain) (ukhc). 7/1999 [MASS=109685]/Kinesin family member 5B (kinesin heavy chain), a microtubule-associated motor protein that may function in intracellular organelle transport and may play a role in susceptibility and resistance                                                                                                                   |
| SW:RB35_HUMAN Q15286 homo sapiens (human). ras-related protein rab-35 (rab-1c) (gtp-binding protein ray). 5/2000 [MASS=23025]/Ras-related GTP-binding protein 35, member of the Rab family of GTP-binding proteins, may function in vesicular transport                                                                                                                                                                                           |
| SW:COPG_HUMAN Q9y678 homo sapiens (human). coatomer gamma subunit (gamma-coat protein) (gamma-cop). 10/2001 [MASS=97718]/Coatomer protein complex subunit gamma 1, a subunit of the coat of COP I-coated vesicles, predicted to be involved in retrograde Golgi to endoplasmic reticulum transport, contains two clathrin-associated adaptin N-terminal domains                                                                                   |
| SW:SN23_HUMAN O00161 homo sapiens (human). synaptosomal associated protein 23 (snap-23) (vesicle-membrane fusion protein snap-23). 5/2000 [MASS=23354]/Synaptosomal-associated protein 23, a member of the SNARE family of proteins that regulate membrane fusion during exocytosis, a t-SNARE that binds to syntaxins and is involved in docking and fusion of transport vesicles during exocytosis                                              |
| SW:RB3D_HUMAN O95716 homo sapiens (human). ras-related protein rab-3d. 5/2000 [MASS=24267]/Ras-related GTP-binding protein 3d, putative small monomeric GTP-binding protein and GTPase that plays a role in regulated secretion                                                                                                                                                                                                                   |

|                                                                                                                                                                                                                                                                                                                                                                                                                                                                       |
|-----------------------------------------------------------------------------------------------------------------------------------------------------------------------------------------------------------------------------------------------------------------------------------------------------------------------------------------------------------------------------------------------------------------------------------------------------------------------|
| <p>SW:RAB2_HUMAN P08886 homo sapiens (human), and canis familiaris (dog). ras-related protein rab-2. 10/1994 [MASS=23546]/Ras-related GTP-binding protein 2, a GTPase which plays a role in vesicle transport from the ER to the Golgi complex; overexpression in nonmalignant peripheral blood lymphocytes is associated with Searzy syndrome</p>                                                                                                                    |
| <p>SW:GBAK_HUMAN P08754 homo sapiens (human). guanine nucleotide-binding protein g(k), alpha subunit (g(i) alpha-3). 11/1997 [MASS=40401]/G protein alpha i3 subunit, a component of pertussis toxin sensitive heterotrimeric G protein complexes, transduces signals from G protein-coupled receptors to intracellular effectors, inhibits forskolin-stimulated cAMP production</p>                                                                                  |
| <p>GP:AF091079_1 Homo sapiens clone 560 SNARE protein Ykt6 mRNA, partial cds. [MASS=21607]/Homolog of <i>S. cerevisiae</i> Ykt6p, which is a v-SNARE required for ER to Golgi transport, likely involved in trafficking proteins from the ER to the Golgi</p>                                                                                                                                                                                                         |
| <p>SW:CLH1_HUMAN Q00610 homo sapiens (human). clathrin heavy chain 1 (clh-17) (kiaa0034). 5/2000 [MASS=191615]/Clathrin heavy polypeptide c, involved in endocytosis, may bind to endocytic proteins through an LLDLD consensus sequence, interacts with huntingtin interacting protein 1 (HIP1), amino terminus folds into a seven-bladed beta-propeller</p>                                                                                                         |
| <p>GP:AJ131245_1 Homo sapiens mRNA for Sec24 protein (Sec24B isoform). [MASS=137789]/SEC24 related gene family member B, a member of the SEC24 family of vesicle trafficking proteins, interacts with SEC23A, predicted to be localized to COPII-coated vesicles and to be involved in the export of proteins from the endoplasmic reticulum</p>                                                                                                                      |
| <p>SW:DYN2_HUMAN P50570 homo sapiens (human). dynamin 2. 10/1996 [MASS=98018]/Dynamin II, member of a family of 100-kD guanosine triphosphatases, regulates budding of endocytic vesicles at the plasma membrane and may function in the formation of transport vesicles at the trans-Golgi</p>                                                                                                                                                                       |
| <p>GP:D31886_1 Human mRNA for KIAA0066 gene, partial cds. [MASS=110524]/RAB3 GTPase-activating protein, GTPase-activating protein specific for lipid-modified members of the Rab3 subfamily, may influence calcium-dependent exocytosis of synaptic vesicles</p>                                                                                                                                                                                                      |
| <p>SW:CALX_HUMAN P27824 homo sapiens (human). calnexin precursor (major histocompatibility complex class i antigen-binding protein p88) (p90) (ip90). 11/1995 [MASS=67568]/Calnexin, a calcium and lectin binding protein that functions as a chaperone in the endoplasmic reticulum, involved in protein folding and secretion, mediates retention of misfolded proteins in the endoplasmic reticulum</p>                                                            |
| <p>SW:ER53_HUMAN P49257 homo sapiens (human). ergic-53 protein precursor (er-golgi intermediate compartment 53 kda protein) (gp58) (mr60) (lectin, mannose-binding 1). 7/1998 [MASS=57563]/Mannose-binding lectin 1, involved in the traffic of glycoproteins between endoplasmic reticulum and the Golgi apparatus; mutations of the corresponding gene is associated with combined factor V and VIII coagulation deficiency</p>                                     |
| <p>GP:U45976_1 Human clathrin assembly protein lymphoid myeloid leukemia (CALM) mRNA, complete cds. [MASS=70695]/Phosphatidylinositol binding clathrin assembly protein, binds to clathrin heavy chain (CLTC) and plays a role in coated pit internalization; rearrangements in the corresponding gene are associated with acute lymphoblastic and acute myeloid leukemias</p>                                                                                        |
| <p>SW:ADB_HUMAN P21851 homo sapiens (human), rattus norvegicus (rat), and bos taurus (bovine). beta-adaptin (plasma membrane adaptor ha2/ap2 adaptin beta subunit) (clathrin assembly protein complex 2 beta [MASS=104553]/Adaptor-related protein complex 2 beta 1 subunit, a large subunit of the AP2 adaptor complex, involved in clathrin coat assembly at the plasma membrane; may bind to the transmembrane envelope protein of HIV-1 and HTLV retroviruses</p> |
| <p>SW:MPRI_HUMAN P11717 homo sapiens (human). cation-independent mannose-6-phosphate receptor precursor (ci man-6-p receptor) (ci-mpr) (insulin-like growth factor ii receptor) (300 kda mannose 6-phosphate [MASS=274309]/Insulin-like growth factor II receptor, functions in transport of mannose 6-phosphate-containing lysosomal enzymes and IGF-II maturation and clearance, mediates granzyme B-induced apoptosis, putative tumor suppressor</p>               |
| <p>GP:AF044670_1 Homo sapiens 33 kDa Vamp-associated protein (VAP33) mRNA, complete cds; VAP-33. [MASS=27318]/Vesicle-associated membrane protein (VAMP)-associated protein A, binds v-SNAREs, t-SNAREs, VAPB, and VAMP, predicted to be involved in vesicle transport and fusion</p>                                                                                                                                                                                 |
| <p>GP:AF128536_1 Homo sapiens cytoplasmic phosphoprotein PACSIN2 mRNA, complete cds; related to PACSIN1; contains CDC15 N-terminal domain, 3 EH domain-binding NPF motifs, and a C-terminal SH3 domain. [MASS=55905]/Protein kinase C and casein kinase substrate in neurons 2, member of the PACSIN family of cytoplasmic adapter proteins, may function to organize the actin cytoskeleton and regulate vesicular traffic</p>                                       |
| <p>GP:AF004563_1 Homo sapiens hUNC18b alternatively-spliced mRNA, complete cds; alternatively-spliced; similar to rat n-Sec1. [MASS=68736]/Syntaxin-binding protein 1, binds syntaxins, may be involved in synaptic vesicle exocytosis</p>                                                                                                                                                                                                                            |
| <p>SW:G25B_HUMAN P21181 homo sapiens (human), mus musculus (mouse), and bos taurus (bovine). g25k gtp-binding protein, brain isoform (gp) (cdc42 homolog). 12/1998 [MASS=21311]/Cell division cycle 42 (GTP binding protein 25kD), Rho GTPase involved in actin cytoskeleton organization, cell migration, cell cycle progression and apoptosis, downregulated in fibroblasts and macrophages from patients with Tangiers disease</p>                                 |
| <p>SW:143T_HUMAN P27348 homo sapiens (human). 14-3-3 protein tau (14-3-3 protein theta) (14-3-3 protein t-cell) (hs1 protein). 11/1997 [MASS=27764]/14-3-3 theta (14-3-3 tau in T-cells), may modulate T-cell signaling and cytokine expression through interaction with and inhibition of protein kinase C and phosphatidylinositol 3-kinase, may promote cell survival during amyotrophic lateral sclerosis (ALS)</p>                                               |

|                                                                                                                                                                                                                                                                                                                                                                                                                                                                                |
|--------------------------------------------------------------------------------------------------------------------------------------------------------------------------------------------------------------------------------------------------------------------------------------------------------------------------------------------------------------------------------------------------------------------------------------------------------------------------------|
| <p>SW:ACTZ_HUMAN P42024 homo sapiens (human), mus musculus (mouse), and canis familiaris (dog). alpha-centractin (centractin) (centrosome-associated actin homolog) (actin-rpv) (arp1). 7/1999 [MASS=42614]/Actin-related protein 1, a component of the dynactin complex involved in transport along microtubules, associates with centrophilin NUMA1 at nuclear envelope breakdown, expression is significantly reduced in Down syndrome fetal brain</p>                      |
| <p>SWN:STX8_HUMAN Q9unk0 homo sapiens (human). syntaxin 8. 8/2001 [MASS=26907]/Syntaxin 8, member of the soluble NSF attachment protein receptor (SNARE) family, plays a role in endosome trafficking, may mediate vesicle docking and fusion, may regulate CFTR-mediated chloride currents</p>                                                                                                                                                                                |
| <p>GP:AC005545_2 Homo sapiens chromosome 19, cosmid R26634, complete sequence; vesicle coat component, similar to alpha and gamma adaptins. [MASS=121170]/Adaptor-related protein complex 3 delta 1 subunit, a component of the AP-3 complex, involved in intracellular vesicle transport</p>                                                                                                                                                                                  |
| <p>SW:S23A_HUMAN Q15436 homo sapiens (human). protein transport protein sec23 homolog isoform a. 11/1997 [MASS=86147]/Sec23 homolog A, a putative intracellular transporter that plays a role in protein trafficking, interacts with SEC24B and SEC24C</p>                                                                                                                                                                                                                     |
| <p>SW:ADB1_HUMAN Q10567 homo sapiens (human). beta-adaptin 1 (plasma membrane adaptor ha2/ap2 adaptin beta subunit) (clathrin assembly protein complex 2 beta large chain) (ap105a). 7/1999 [MASS=104607]/Adaptor-related protein complex 1 beta 1, likely participates in clathrin-coated vesicle endocytosis and intracellular receptor transport; loss is associated with meningioma tumors</p>                                                                             |
| <p>SW:TERA_HUMAN P55072 homo sapiens (human). transitional endoplasmic reticulum atpase (ter atpase) (15s mg(2+)-atpase p97 subunit) (valosin containing protein) (vcp) [contains: valosin]. 7/1999 [MASS=89322]/Valosin-containing protein, a putative clathrin-binding ATPase involved in cell cycle control, ubiquitin-dependent protein degradation, and JAK-STAT signaling, may be involved in DNA repair via BRCA1, may be involved in receptor-mediated endocytosis</p> |
| <p>GP:AC006942_1 Homo sapiens chromosome 19, cosmid R31181, complete sequence CLATHRIN ASSEMBLY PROTEIN COMPLEX 2 ALPHA-A LARGE CHAIN); Non- consensussplice junction found at position 18996. [MASS=90046]/Adaptor-related protein complex 2 alpha 1 subunit, component of the clathrin adaptor complex, involved in vesicle transport</p>                                                                                                                                    |
| <p>GP:AF020797_1 Homo sapiens AP-mu chain family member mu1B (HSMU1B) mRNA, complete cds. [MASS=48108]/Adaptor-related protein complex 1 mu 2 subunit, involved in protein sorting</p>                                                                                                                                                                                                                                                                                         |
| <p>SW:MPRD_HUMAN P20645 homo sapiens (human). cation-dependent mannose-6-phosphate receptor precursor (cd man-6-p receptor) (cd-mpr) (46 kda mannose 6-phosphate receptor) (mpr 46). 5/2000 [MASS=30993]/Cation-dependent mannose-6-phosphate receptor, involved in intracellular sorting and transport of acid hydrolases, transports lysosomal enzymes</p>                                                                                                                   |
| <p>GP:AC006378_1 Homo sapiens BAC clone RP11-45519 from 7q21.2-q22, complete sequence; match to AAB62941.1 (PID:2253426); H_NH0455109.1. [MASS=13289]/S. cerevisiae Bet1 homolog, may be involved in ER to Golgi transport</p>                                                                                                                                                                                                                                                 |
| <p>PIR2:I53171 pantophysin - human [MASS=28565]/Synaptophysin-like protein (pantophysin), a protein that has similarity to the synaptic vesicle protein synaptophysin (SYP), may play a role in vesicle transport</p>                                                                                                                                                                                                                                                          |
| <p>GP:AF260566_1 Homo sapiens hepatocyte growth factor-regulated tyrosine kinase substrate HRS isoform 2 (HRS) mRNA, complete cds. [MASS=76362]/Hepatocyte growth factor regulated tyrosine kinase substrate, zinc-finger protein with ATPase activity, tyrosine phosphorylated upon growth factor stimulation, involved in endosome trafficking and mediates FOS transcription via cytokine signaling</p>                                                                     |
| <p>SW:COPB_HUMAN P53618 homo sapiens (human). coatomer beta subunit (beta-coat protein) (beta-cop) (fragment). 11/1997 [MASS=33444]/Coatomer protein beta, component of non-clathrin-coated vesicles essential for membrane trafficking, binds to HIV-1 Nef protein</p>                                                                                                                                                                                                        |
| <p>SWN:SNX3_HUMAN O60493 homo sapiens (human). sorting nexin 3 (sdp3 protein). 8/2001 [MASS=18762]/Sorting nexin 3, involved in intracellular protein trafficking</p>                                                                                                                                                                                                                                                                                                          |
| <p>SW:ARF6_HUMAN P26438 homo sapiens (human), mus musculus (mouse), and rattus norvegicus (rat). adp-ribosylation factor 6. 12/1998 [MASS=19951]/ADP-ribosylation factor 6, GTP-binding protein that stimulates cholera toxin activity and is involved in endocytosis, exocytosis, membrane trafficking, and possibly regulation of glucose transport</p>                                                                                                                      |
| <p>GP:AF151858_1 Homo sapiens CGI-100 protein mRNA, complete cds. [MASS=26005]/Protein with high similarity to T1-ST2 receptor binding protein (human IL1RL1LG), which binds to the T1/ST2 receptor (human IL1RL1), member of the emp24 family, which are involved in protein transport from endoplasmic reticulum to Golgi</p>                                                                                                                                                |
| <p>GP:AF032922_1 Homo sapiens syntaxin 4 binding protein UNC-18c (UNC-18c) mRNA, complete cds. [MASS=67764]/Syntaxin binding protein 3, binds syntaxin 4 (STX4), predicted to be involved in vesicle transport and docking and in neurotransmitter release</p>                                                                                                                                                                                                                 |
| <p>SW:STB2_HUMAN Q15833 homo sapiens (human). syntaxin binding protein 2 (unc-18 homolog 2) (unc-18b). 5/2000 [MASS=66439]/Syntaxin-binding protein 2, a member of the Sec1 family of proteins involved in synaptic transmission and secretion, may be involved in intracellular vesicular transport</p>                                                                                                                                                                       |
| <p>SW:AP50_HUMAN P20172 homo sapiens clathrin coat assembly protein ap50 (clathrin coat associated protein ap50) (plasma membrane adaptor ap-2 50 kda protein) (ha2 50 kda subunit) (clathrin assembly protei [MASS=49655]/Medium chain subunit of the clathrin associated protein complex AP2, involved in vesicle transport, endocytosis, and required for V-ATPase complex activity</p>                                                                                     |
| <p>SW:NSF_HUMAN P46459 homo sapiens (human). vesicular-fusion protein nsf (n-ethylmaleimide-sensitive fusion protein) (nem-sensitive fusion protein). 12/1998 [MASS=82654]/N-ethylmaleimide-sensitive factor, an ATPase involved in membrane fusion during exocytosis</p>                                                                                                                                                                                                      |

|                                                                                                                                                                                                                                                                                                                                                                                                                                                        |
|--------------------------------------------------------------------------------------------------------------------------------------------------------------------------------------------------------------------------------------------------------------------------------------------------------------------------------------------------------------------------------------------------------------------------------------------------------|
| no_description_avail/Coatomer protein complex subunit gamma 2, putative intracellular transporter that may be involved in non-selective vesicle transport                                                                                                                                                                                                                                                                                              |
| SW:COPP_HUMAN P35606 homo sapiens (human). coatomer beta' subunit (beta'-coat protein) (beta'-cop) (p102). 12/1998 [MASS=102356]/Coatomer protein (COP) complex subunit beta 2 (COP beta prime), part of a Golgi coatomer complex that comprises the coat of non-clathrin coated vesicles, likely to play a role in exocytosis                                                                                                                         |
| SW:RAB7_HUMAN P51149 homo sapiens (human). ras-related protein rab-7. 7/1998 [MASS=23490]/Ras-related GTP-binding protein 7, a member of the rab family of proteins that is involved in vesicle transport, membrane fusion, and vacuole formation; implicated in Chediak Higashi Syndrome                                                                                                                                                              |
| GP:AB019435_1 Homo sapiens mRNA for putative phospholipase, complete cds; putative. [MASS=111076]/Sec23-interacting protein p125, a proline rich protein containing a phospholipase motif, binds to the COPII vesicle coat protein Sec23p (mouse Sec23a), may play a role in protein transport between the endoplasmic reticulum and Golgi                                                                                                             |
| GP:U85946_1 Homo sapiens brain secretory protein hSec10p (HSEC10) mRNA, complete cds; similar to S. cerevisiae Sec10p. [MASS=81853]/SEC10 (S. cerevisiae)-like 1, a component of the exocyst complex, involved in the synthesis and delivery of secretory proteins in epithelial cells, involved in the development of epithelial cysts and tubules                                                                                                    |
| Homo sapiens, vacuolar protein sorting 35/Maternal-embryonic 3, may be a component of the sorting machinery required for vesicle to Golgi retrieval                                                                                                                                                                                                                                                                                                    |
| PIR2:S33377 P63 protein - human [MASS=65793]/Cytoskeleton-associated protein 4, type II membrane protein of the endoplasmic reticulum, binds to microtubules and links them to the endoplasmic reticulum, promotes tubulin polymerization and endoplasmic reticulum reorganization                                                                                                                                                                     |
| SW:TM21_HUMAN P49755 homo sapiens (human). transmembrane protein tmp21 precursor (s31iii125) (s31i125). 12/1998 [MASS=24976]/Transmembrane protein Mr 21,000, involved in biosynthetic protein transport from the ER to Golgi, regulates Rac-GTP levels through interaction with beta 2-chimaerin (CHN2); corresponding gene is located in the AD3 region mutated in Alzheimer's Disease                                                               |
| SWN:CNE3_HUMAN O75131 homo sapiens (human). copine iii. 8/2001 [MASS=60131]/Copine III, a member of the copine family of phospholipid binding proteins, contains C2 and integrin A domains, may play a role in membrane trafficking, displays protein kinase activity, however, it does not contain a traditional kinase catalytic domain                                                                                                              |
| SW:RB13_HUMAN P51153 homo sapiens (human). ras-related protein rab-13. 12/1998 [MASS=22774]/Ras-related GTP-binding protein 13, a putative RAB small monomeric GTPase that is likely to play a role in intracellular protein trafficking and cell adhesion                                                                                                                                                                                             |
| SW:GDIB_HUMAN P50395 homo sapiens (human). rab gdp dissociation inhibitor beta (rab gdi beta) (gdi-2). 7/1998 [MASS=50664]/Guanosine diphosphate dissociation inhibitor 2, one of a family proteins that regulate GDP/GTP cycle and are involved in intracellular vesicular trafficking, associates with RAB1B, RAB5 and RAB6 and may play a role in their intracellular targeting                                                                     |
| PIR2:I53799 CG1 protein - human [MASS=149611]/human kinectin/Kinectin, functions as a receptor for the microtubule-motor protein kinesin and plays a role in intracellular movement of organelles; mutations in the corresponding gene are associated with childhood papillary thyroid carcinoma                                                                                                                                                       |
| PIR2:A55575 ankyrin 3, long splice form - human [MASS=480403]/Ankyrin 3 (ankyrin G), may link integral membrane proteins to the cytoskeleton, may play a role in localizing sodium channels to the axonal initial segment and nodes of Ranvier, may play a role in vesicle transport                                                                                                                                                                   |
| SW:COPA_HUMAN P53621 homo sapiens (human). coatomer alpha subunit (alpha-coat protein) (alpha-cop) (hepcop) (hepcop) [contains: xenin (xenopsin-related peptide); proxenin]. 5/2000 [MASS=138332]/ Coatomer protein complex subunit alpha, involved in transport between the endoplasmic reticulum and the Golgi apparatus, binds to RNA, N-terminal 25 amino acids may be cleaved to release the peptide xenin, which stimulates pancreatic secretion |
|                                                                                                                                                                                                                                                                                                                                                                                                                                                        |
| SW:PRS7_HUMAN P35998 homo sapiens (human). 26s protease regulatory subunit 7 (mss1 protein). 11/1997 [MASS=48634]/26S protease regulatory subunit 7, ATPase subunit of the 26S proteasome, interacts with Tat protein, may be involved in cell cycle control and has a role in the activation of human immunodeficiency virus-1 (HIV-1) gene transcription                                                                                             |
| SW:VE1_HPV14 P36721 human papillomavirus type 14. replication protein e1. 7/1998 [MASS=69302]/ATP-DEPENDENT DNA HELICASE REQUIRED FOR INITIATION OF VIRAL DNA REPLICATION. IT FORMS A COMPLEX WITH THE VIRAL E2 PROTEIN. THE E1-E2 COMPLEX BINDS TO THE REPLICATION ORIGIN WHICH CONTAINS BINDING SITES FOR BOTH PROTEINS                                                                                                                              |
| SW:EBI2_HUMAN P32249 homo sapiens (human). ebv-induced g protein-coupled receptor 2 (ebi2). 7/1998 [MASS=41224]/Epstein-Barr virus induced gene 2, a lymphocyte specific G protein-coupled receptor that may mediate the effects of Epstein-Barr virus on B lymphocytes                                                                                                                                                                                |
| SW:MCP_HUMAN P15529 homo sapiens (human). membrane cofactor protein precursor (cd46 antigen) (trophoblast leucocyte common antigen) (tlx). 5/2000 [MASS=42248]/Membrane cofactor protein (CD46), a cofactor for factor I-mediated cleavage of C3B and C4B, a T-cell coactivator with signal transduction properties, and a receptor for viruses and bacteria, protects host cells against complement-mediated cytolysis                                |
|                                                                                                                                                                                                                                                                                                                                                                                                                                                        |



|                                                                                                                                                                                                                                                                                                                                                                                                                                                                                                                                                                                                                                                                                                                              |
|------------------------------------------------------------------------------------------------------------------------------------------------------------------------------------------------------------------------------------------------------------------------------------------------------------------------------------------------------------------------------------------------------------------------------------------------------------------------------------------------------------------------------------------------------------------------------------------------------------------------------------------------------------------------------------------------------------------------------|
| <p>SW:TMS2_HUMAN O15393 homo sapiens (human). transmembrane protease, serine 2 (ec 3.4.21.-). 7/1998 [MASS=53847]/Transmembrane protease serine 2 (epitheliasin), a putative serine endopeptidase with transmembrane, LDLRA (LDL receptor class A) and SRCR (scavenger receptor cysteine-rich) domains; highly expressed in androgen-dependent prostate cancer</p>                                                                                                                                                                                                                                                                                                                                                           |
| <p>GP:AC005278_12 Arabidopsis thaliana chromosome 1 BAC F15K9 sequence, complete sequence; Contains similarity to transcription initiation factor IIE, alpha subunit gb X63468 from Homo sapiens.. [MASS=57306]</p>                                                                                                                                                                                                                                                                                                                                                                                                                                                                                                          |
| <p>GP:AK000542_1 Homo sapiens cDNA FLJ20535 fis, clone KAT11013; unnamed protein product. [MASS=75854] contains a Tetratricopeptide repeats Domain/Protein containing three TPR (tetratricopeptide repeat) domains, which may mediate protein-protein interactions</p>                                                                                                                                                                                                                                                                                                                                                                                                                                                       |
| <p>SW:CD9_HUMAN P21926 homo sapiens (human). cd9 antigen (p24) (leukocyte antigen mic3) (motility-related protein) (mrp-1). 7/1999 [MASS=25285]/ CD9</p>                                                                                                                                                                                                                                                                                                                                                                                                                                                                                                                                                                     |
| <p>SW:PROS_HUMAN P07288 homo sapiens (human). prostate specific antigen precursor (ec 3.4.21.77) (psa) (gamma-seminoprotein) (semenogelase) (seminin) (p-30 antigen). 7/1999 [MASS=28741]/Kallikrein 3, (prostate specific antigen), serine protease, dissolves seminal coagulum, may play a role in regulation of cell growth, may be involved in prostate cancer invasion and metastasis, used as marker to test for and monitor prostate cancer</p>                                                                                                                                                                                                                                                                       |
| <p>PIR2:T34532 hypothetical protein DKFZp434B1517.1 - human (fragment) [MASS=71502]CH, Calponin homology domain; Actin binding domains present in duplicate at the N-termini of spectrin-like proteins (including dystrophin, alpha-actinin/LIM, Zinc binding domain present in Lin-11, Isl-1, Mec-3; Zinc-binding domain family. Some LIM domains bind protein partners via tyrosine-containing motifs. LIM domains are found in many key regulators of developmental pathways/Protein containing a calponin homology (CH) domain and LIM domains, has a region of moderate similarity to a region of beta spectrin (beta-fodrin, human SPTB), which is a component of the erythrocyte membrane-associated cytoskeleton</p> |
| <p>GP:AB037745_1 Homo sapiens mRNA for KIAA1324 protein, partial cds; Start codon is not identified.. [MASS=63365]<br/>[FUNCTION] AFFECTS PLASMA MEMBRANE H<sup>+</sup>-ATPASE ACTIVITY. MAY ACT ON A GLUCOSE-SIGNALING PATHWAY THAT CONTROLS THE EXPRESSION OF SEVERAL GENES THAT ARE TRANSCRIPTIONALLY REGULATED BY GLUCOSE SUCH AS PMA1,HXT3 AND SNF3.[SUBCELLULAR LOCATION] INTEGRAL MEMBRANE PROTEIN (PROBABLE).[SIMILARITY] BELONGS TO GNS1/SUR4/YJL196C/C40H1.4 FAMILY./Elongation of very long chain fatty acids-like 2, protein with strong similarity to murine Ssc2, which is a member of a family of enzymes involved in tissue specific biosynthesis of very long chain fatty acids and sphingolipids</p>       |
| <p>diminuto-like protein /24-dehydrocholesterol reductase, catalyzes the reduction of the delta (24) double bond of sterols in cholesterol biosynthesis, blocks apoptosis after oxidative stress and APP -induced toxicity; gene mutation is detected in desmosterolosis</p>                                                                                                                                                                                                                                                                                                                                                                                                                                                 |
| <p>GP:AK022527_1 Homo sapiens cDNA FLJ12465 fis, clone NT2RM1000802; unnamed protein product. [MASS=103079] similar to Peptidase_C2, Calpain family cysteine protease/A Novel Gene ' Niban ' Upregulated in Renal Carcinogenesis/Protein of unknown function, has high similarity to uncharacterized rat Niban</p>                                                                                                                                                                                                                                                                                                                                                                                                           |
| <p>GP:AK025588_1 Homo sapiens cDNA: FLJ21935 fis, clone HEP04373; unnamed protein product. [MASS=83792]/ contains a SH3 domain/ similar to epidermal growth factor receptor pathway substrate 8 /Protein containing an Src homology 3 (SH3) domain, which bind proline-rich peptides, has moderate similarity to human EPS8, which is tyrosine-phosphorylated by epidermal growth factor receptor (human EGFR) and enhances EGF -dependent mitogenic signals</p>                                                                                                                                                                                                                                                             |
| <p>GP:AJ245222_1 Homo sapiens mRNA for immunoglobulin gamma heavy chain variable region, partial, clone 2A-3G17. [MASS=13498]</p>                                                                                                                                                                                                                                                                                                                                                                                                                                                                                                                                                                                            |
| <p>contains a repeated domain in ubiquitin activating enzyme E1 and members of the bacterial ThiF/MoeB/HesA family/Member of the UBA-THIF-type NAD-FAD binding fold family, has a region of low similarity to a region of S. pombe Uba2p, which is required for the activation of the ubiquitin-like S. pombe Ubl2p for conjugation to other enzymes</p>                                                                                                                                                                                                                                                                                                                                                                     |
| <p>GP:AJ239387_1 Homo sapiens mRNA for immunoglobulin heavy chain variable region, ID 81; ID 81. [MASS=13150]</p>                                                                                                                                                                                                                                                                                                                                                                                                                                                                                                                                                                                                            |
| <p>GP:AB020706_1 Homo sapiens mRNA for KIAA0899 protein, partial cds. [MASS=102986]/ADAPTER-RELATED PROTEIN COMPLEX 2 ALPHA 2 SUBUNIT"/Alpha-adaptin-C, a protein that interacts with the polyglutamine-containing protein called huntingtin (HD) which is associated with Huntington's disease</p>                                                                                                                                                                                                                                                                                                                                                                                                                          |
| <p>GP:AC011001_19 Arabidopsis thaliana chromosome I BAC F4H5 genomic sequence, complete sequence; Putative membrane protein; Similar to predicted proteins in yeast, human and Drosophila. Predicted to be a membrane protein. [MASS=130186]/similar to GASTRIN/CHOLECYSTOKININ TYPE B RECEPTOR (CCK-B RECEPTOR) (CCK-BR)</p>                                                                                                                                                                                                                                                                                                                                                                                                |
| <p>GP:AB040955_1 Homo sapiens mRNA for KIAA1522 protein, partial cds; Start codon is not identified. fh14706 cDNA clone for KIAA1522 has a 241-bp deletion at the position between 1701 and 1943 of the sequence of KIAA1522.. [MASS=107934]/Protein of unknown function, has a region of weak similarity to a region of heavy polypeptide of neurofilament (mouse Nfh), which is a cytoskeleton structural protein that may regulate axon caliber, synaptic transmission and intermediate filament assembly</p>                                                                                                                                                                                                             |
| <p>PIR2:S71949 metalloproteinase 12 (EC 3.4.24.-) precursor - human [MASS=72759]/Meltrin alpha, member of the metalloproteinase-disintegrin family, metalloproteinase involved in cell adhesion and muscle cell differentiation and fusion</p>                                                                                                                                                                                                                                                                                                                                                                                                                                                                               |
| <p>GP:U85992_1 Human clone IMAGE:35527 unknown protein mRNA, partial cds. [MASS=19006]/ similar to ryanodine receptor, calcium release channel</p>                                                                                                                                                                                                                                                                                                                                                                                                                                                                                                                                                                           |

|                                                                                                                                                                                                                                                                                                                                                                                                                                                                                                                                                                                                                      |
|----------------------------------------------------------------------------------------------------------------------------------------------------------------------------------------------------------------------------------------------------------------------------------------------------------------------------------------------------------------------------------------------------------------------------------------------------------------------------------------------------------------------------------------------------------------------------------------------------------------------|
| <p>PIR2:T17320 hypothetical protein DKFZp564J0863.1 - human (fragment) [MASS=61969]/ similar to Mus musculus ARL-6 interacting protein-2 (Aip-2)/ similar to GBP, Guanylate-binding protein, N-terminal domain. Transcription of the anti-viral guanylate-binding protein (GBP) is induced by interferon-gamma during macrophage induction. This family contains GBP1 and GBP2, both GTPases capable of binding GTP, GDP and GMP.</p>                                                                                                                                                                                |
| <p>PIR2:A49674 flightless-1 homolog - human (fragment) [MASS=144620]/Flightless 1 homolog (Drosophila), actin binding protein of the gelsolin family, interacts with other proteins including the repressor LRRFIP1, may function in signal transduction; gene maps within Smith Magenis syndrome microdeletion critical region</p>                                                                                                                                                                                                                                                                                  |
| <p>SW:CRP2_HUMAN P52943 homo sapiens (human). cysteine-rich protein 2 (crp2) (esp1 protein). 11/1997 [MASS=22493]/ CONTAINS 2 LIM DOMAINS. THE LIM DOMAIN BINDS 2 ZINC IONS</p>                                                                                                                                                                                                                                                                                                                                                                                                                                      |
| <p>PIR2:T00261 hypothetical protein KIAA0603 - human [MASS=146606]/ contains a Phosphotyrosine-binding domain, phosphotyrosine-interaction (PI) domain; PTB/PI domain structure similar to those of pleckstrin homology (PH) and IRS-1-like PTB domains. / contains a TBC, TBC domain. Identification of a TBC domain in GYP6_YEAST and GYP7_YEAST, which are GTPase activator proteins of yeast Ypt6 and Ypt7, imply that these domains are GTPase activator proteins of Rab-like small GTPases/KIAA0603 gene product, contains a TBC domain similar to that found in the deubiquitinating enzyme USP6 oncogene</p> |
| <p>SW:B2MG_HUMAN P01884 homo sapiens (human), pan troglodytes (chimpanzee), and gorilla gorilla gorilla (lowland gorilla). beta-2-microglobulin precursor. 5/2000 [MASS=13715]/Beta 2-microglobulin, component of class I major histocompatibility antigen that bind and present antigenic peptides to cytotoxic T lymphocytes (CTLs), major component of hemodialysis-associated amyloid fibrils, associated with cancer progression</p>                                                                                                                                                                            |
| <p>SW:ANX4_HUMAN P09525 homo sapiens (human). annexin iv (lipocortin iv) (endonexin i) (chromobindin 4) (protein ii) (p32.5) (placental anticoagulant protein ii) (pap-ii) (pp4-x) (35-beta calcimedlin) (carb [MASS=35752]/ membrane aggregation/Annexin IV, a calcium-dependent phospholipid-binding protein involved in regulation of transmembrane conductance and endocytosis, inhibits phospholipase A2, and has in vitro anticoagulation activity, may confer paclitaxel resistance to cancer cell lines</p>                                                                                                  |
| <p>LYST-interacting protein LIP5;"Interactions of the Chediak-Higashi lysosomal-trafficking regulator protein with SNARE complex and signal transduction proteins"; dopamine responsive protein DRG-1/Protein containing a beige or BEACH domain and five WD domains (WD-40 repeats), has a region of moderate similarity to a region of lysosomal trafficking regulator protein (mouse Lyst), which is required for vesicular transport to and from lysosomes</p>                                                                                                                                                   |
| <p>contains a DEXDc, DEAD-like helicases superfamily domains/Member of the DEAD or DEAH box ATP-dependent RNA helicase family, contains two helicase conserved C-terminal domains, has low similarity to C. elegans MOG-4, which is involved in oogenesis and development/</p>                                                                                                                                                                                                                                                                                                                                       |
| <p>SW:PLSL_HUMAN P13796 homo sapiens (human). l-plastin (lymphocyte cytosolic protein 1) (lcp-1) (lc64p). 11/1997 [MASS=70289]/Lymphocyte cytosolic protein 1, member of the fibrin family, binds calcium and bundles actin, binds to the Ca2+ binding protein grancalcin (GCA), binds to the HLA-DR53 molecule, which is linked to autoimmune diseases; may contribute to tumorigenesis</p>                                                                                                                                                                                                                         |
| <p>The human TDE gene homologue: localization to 20q13.1-13.3 and variable expression in human tumor cell lines and tissue/ membrane protein/Tumor differentially expressed 1, a putative membrane protein that is overexpressed in lung tumors and colorectal tumor cells</p>                                                                                                                                                                                                                                                                                                                                       |
| <p>GP:AB029025_1 Homo sapiens mRNA for KIAA1102 protein, partial cds. [MASS=95613]/ contains a LIM domain/ EST/Protein containing a LIM domain, which may mediate protein-protein interactions</p>                                                                                                                                                                                                                                                                                                                                                                                                                   |
| <p>GP:AB033001_1 Homo sapiens mRNA for KIAA1175 protein, partial cds; Start codon is not identified.. [MASS=70419]/ human homologue of cytosolic sorting protein PACS-1a /Cytosolic sorting protein 1, may control the subcellular localization of proteins between the Golgi and endosomal compartments; may play a role in the pathogenesis of HIV-1</p>                                                                                                                                                                                                                                                           |
| <p>GP:AK024639_1 Homo sapiens cDNA: FLJ20986 fis, clone CAE01156; unnamed protein product. [MASS=69591]/ contains a domain similar to a hydrolase/ PROBABLE CATION-TRANSPORTING ATPASE/Member of the haloacid dehalogenase or epoxide hydrolase family, has weak similarity to a region of sodium- and potassium-transporting ATPase alpha 4 (rat Atp1a4), which is an ATPase that is sensitive to inhibition by ouabain and vanadate</p>                                                                                                                                                                            |
| <p>PIR2:JE0350 Anterior gradient-2 - human [MASS=19979]/hAG-2, the human homologue of the Xenopus laevis cement gland gene XAG-2, is coexpressed with estrogen receptor in breast cancer cell lines/Anterior gradient 2 (Xenopus laevis) homolog, putative protein coexpressed with estrogen receptor in some breast cancer cell lines, expression in a colon carcinoma cell line may be regulated by the peroxisome proliferator-activated receptor gamma (PPARG)</p>                                                                                                                                               |
| <p>SW:ARGR_HUMAN P55145 homo sapiens (human). arginine-rich protein. 10/1996 [MASS=26906]/A gene from human chromosomal band 3p21.1 encodes a highly conserved arginine-rich protein and is mutated in renal cell carcinomas/Arginine-rich mutated in early stage tumors, may be involved in cell growth or maintenance; point mutations of the gene are seen in renal cell carcinoma, pancreatic cancer, squamous cell carcinoma and other cancers of the lung, breast, and prostate</p>                                                                                                                            |
| <p>SW:MGD2_HUMAN Q9unf1 homo sapiens (human). melanoma-associated antigen d2 (mage-d2 antigen) (breast cancer associated gene 1 protein) (bcg-1) (11b6). 10/2001 [MASS=64954]/Member of the MAGE (melanoma antigen-encoding gene) family, which are expressed in a variety of tumors, has moderate similarity to neurotrophin-receptor interacting MAGE homolog (rat Maged1), which positively regulates LNGFR-mediated apoptosis</p>                                                                                                                                                                                |
| <p>GP:AC004839_2 [MASS=28320/B-cell antigen receptor-associated protein 29, protein with strong similarity to murine Bcap29p, a B-cell receptor-associated protein that associates preferentially with IgD and weakly with IgM]</p>                                                                                                                                                                                                                                                                                                                                                                                  |

|                                                                                                                                                                                                                                                                                                                                                                                                                                               |
|-----------------------------------------------------------------------------------------------------------------------------------------------------------------------------------------------------------------------------------------------------------------------------------------------------------------------------------------------------------------------------------------------------------------------------------------------|
| SW:XIP_HUMAN O43504 homo sapiens (human). hepatitis b virus x interacting protein (hbx-interacting protein) (hbx interacting protein). 5/2000 [MASS=9614]/Hepatitis B virus x-interacting protein, an antiviral response protein that interacts with hepatitis B virus protein x (HBx), inhibits hepatitis B viral replication and disrupts the viral life cycle by negatively regulating HBx transactivation activity                        |
| SW:CYSR_HUMAN P21291 homo sapiens (human). cysteine-rich protein 1 (crp1) (crp). 7/1999 [MASS=20436]/Cysteine and glycine-rich protein, a two zinc finger/LIM domain protein which interacts with alpha actinin (ACTN1); capable of homodimerization, may also be a DNA-binding protein                                                                                                                                                       |
| PIR2:T46901 hypothetical protein DKFZp761C10121.1 - human [MASS=44684]/Protein with high similarity to GTP-binding proteins                                                                                                                                                                                                                                                                                                                   |
| GP:AK026010_1 Homo sapiens cDNA: FLJ22357 fis, clone HRC06404; unnamed protein product. [MASS=97371]/Member of the rhomboid family of integral membrane proteins, has high similarity to uncharacterized human FLJ22341                                                                                                                                                                                                                       |
| PIR2:T08684 hypothetical protein DKFZp564L2123.1 - human (fragment) [MASS=60751]/Member of the ZIP zinc transporter family, which may be metal transporters, has moderate similarity to uncharacterized human LIV-1                                                                                                                                                                                                                           |
| SW:2AAA_HUMAN P30153 homo sapiens (human). serine/threonine protein phosphatase 2a, 65 kda regulatory subunit a, alpha isoform (pp2a, subunit a, pr65-alpha isoform) (pp2a, subunit a, r1-alpha isoform) ( [MASS=65092]/Protein phosphatase 2 regulatory subunit A alpha isoform, a regulatory subunit of the PP2 enzyme complex, binds CTLA-4 (Cd152), CD28 and RelA (RELA); mutations in the gene are occasionally detected in cancer cells |
| SW:DY12_HUMAN Q13409 homo sapiens (human). dynein intermediate chain 2, cytosolic (dh ic-2) (cytoplasmic dynein intermediate chain 2) (fragment). 5/2000 [MASS=39236]/Protein with strong similarity to cytoplasmic dynein intermediate polypeptide 2 (rat Dnci2), which may interact with p150Glued (rat Dctn1) subunit of dynactin                                                                                                          |
| GP:D38549_1 Human mRNA for KIAA0068 gene, partial cds; ha1025 is new. [MASS=147136]/Cytoplasmic FMRP interacting protein 1, a member of the CYFIP protein family, binds F-actin and active, GTP-bound RAC1, predicted to play a role in membrane ruffling formation and may be necessary for neuronal structure development or maintenance                                                                                                    |
| GP:AB002366_1 Human mRNA for KIAA0368 gene, partial cds. [MASS=159478]/Protein of unknown function, has low similarity to a region of <i>S. cerevisiae</i> Ecm29p, which is involved in cell wall structure or biosynthesis                                                                                                                                                                                                                   |
| SW:ZO1_HUMAN Q07157 homo sapiens (human). tight junction protein zo-1 (zona occludens 1 protein) (tight junction protein 1). 5/2000 [MASS=194723]/Tight junction protein 1, component of the blood brain barrier that may play roles in the organization and attachment of tight junction components, cellular differentiation, placental development, breast cancer progression, and pancreatic cancer                                       |
| PIR2:T17218 hypothetical protein DKFZp434P1750.1 - human [MASS=26577]/Protein of unknown function, has moderate similarity to a region of EBP50-PDZ interactor of 64 kD (human EPI64), which is a putative RAB GTPase activator that binds the PDZ domains of ERM-binding phosphoprotein 50 (SLC9A3R1) and E3KARP (SLC9A3R2)                                                                                                                  |
| SW:DYJ2_HUMAN O43237 homo sapiens (human). dynein light intermediate chain 2, cytosolic (lic53/55) (lic-2). 7/1998 [MASS=54099]/Cytoplasmic dynein light intermediate chain 2, a putative subunit of cytoplasmic dynein that may have ATPase activity                                                                                                                                                                                         |
| SW:9123_HUMAN P51808 homo sapiens (human). protein 91/23. 11/1997 [MASS=13062]/T-complex-associated-testis-expressed 1-like, protein with similarity to murine Tctex1, which is a dynein light chain expressed in retina and in germ cells of the testis                                                                                                                                                                                      |
| PIR2:T46394 hypothetical protein DKFZp434H0820.1 - human (fragment) [MASS=78344]/Protein of unknown function, has moderate similarity to uncharacterized human C1ORF24                                                                                                                                                                                                                                                                        |
| GP:AB040884_1 Homo sapiens mRNA for KIAA1451 protein, partial cds; Start codon is not identified.. [MASS=56449]/Member of the oxysterol-binding protein (OSBP) family, which are involved in sterol biosynthesis and possibly regulation, contains a pleckstrin homology (PH) domain, has a region of moderate similarity to <i>S. cerevisiae</i> Osh7p                                                                                       |
| GP:U21252_1 Human rearranged Ig gamma heavy chain V region (VH3-JH4b) mRNA, partial cds, clone JGpFv3-06 VH; from VH3 family gene and JH4b. [MASS=13752]                                                                                                                                                                                                                                                                                      |
| GP:D87438_1 Human mRNA for KIAA0251 gene, partial cds; Similar to a <i>C.elegans</i> protein in cosmid C14H10. [MASS=90027]/Protein containing two pyridoxal-dependent group II decarboxylase conserved domains, which bind pyridoxal-phosphate groups, has strong similarity to uncharacterized mouse Kiaa0251-hp                                                                                                                            |
| GP:AB032997_1 Homo sapiens mRNA for KIAA1171 protein, partial cds; Start codon is not identified.; hh05501 cDNA clone for KIAA1171 has 960-bp and 414-bp insertions (may be introns) after the positions 1275 and 1339 of the sequence of KIAA1171, respectively.. [MASS=66540]/Protein of unknown function                                                                                                                                   |
| SW:ENP2_HUMAN Q9y5i3 homo sapiens (human). ectonucleoside triphosphate diphosphohydrolase 2 (ec 3.6.1.3) (ntpdase2) (ecto-atpase) (cd39 antigen-like 1). 10/2001 [MASS=53665]/Ectonucleoside triphosphate diphosphohydrolase 2, a member of the CD39-like family that functions as a ecto-ATPase                                                                                                                                              |
| GP:AK023914_1 Homo sapiens cDNA FLJ13852 fis, clone THYRO1000934, weakly similar to PYRROLINE-5-CARBOXYLATE REDUCTASE (EC 1.5.1.2); unnamed protein product. [MASS=28663]/Protein with high similarity to pyrroline-5-carboxylate reductase 1 (human PYCR1), which catalyzes the NAD(P)H dependent reduction of pyrroline-5-carboxylate to proline, member of the delta 1-pyrroline-5-carboxylate reductase (P5CR) family                     |
| SW:AMP1_HUMAN P53582 homo sapiens (human). putative methionine aminopeptidase 1 (ec 3.4.11.18) (metap 1) (peptidase m 1) (kiaa0094) (fragment). 11/1997 [MASS=44046]/Methionine aminopeptidase 1, metallopeptidase that cleaves N-terminal methionine when the adjacent residue is small and uncharged, enzymatic activity may not be inhibited by the angiogenesis inhibitor fungal fumagillin                                               |

|                                                                                                                                                                                                                                                                                                                                                                                           |
|-------------------------------------------------------------------------------------------------------------------------------------------------------------------------------------------------------------------------------------------------------------------------------------------------------------------------------------------------------------------------------------------|
| GP:AB020637_1 Homo sapiens mRNA for KIAA0830 protein, partial cds. [MASS=57202]/Protein of unknown function                                                                                                                                                                                                                                                                               |
| GP:AB040887_1 Homo sapiens mRNA for KIAA1454 protein, partial cds; Start codon is not identified.. [MASS=142702]/Protein of unknown function                                                                                                                                                                                                                                              |
| PIR2:T46299 hypothetical protein DKFZp434J0310.1 - human [MASS=38923]/Three prime repair exonuclease 1, member of the exonuclease family, displays 3'-5' exodeoxyribonuclease activity and may be involved in DNA repair                                                                                                                                                                  |
| GP:AB046798_1 Homo sapiens mRNA for KIAA1578 protein, partial cds; Start codon is not identified.. [MASS=132841]                                                                                                                                                                                                                                                                          |
| GP:AF155652_1 Human potassium channel modulatory factor mRNA; PCMF. [MASS=41973]/Protein containing a ZZ zinc finger and a C2H2 type zinc finger domain, which bind nucleic acids, has high similarity to uncharacterized mouse 1700094M07Rik                                                                                                                                             |
| GP:AF167438_1 Homo sapiens androgen-regulated short-chain dehydrogenase/reductase 1 (ARSDR1) mRNA, complete cds; short-chain dehydrogenase/reductase family member./Member of the short-chain dehydrogenase-reductase family, has moderate similarity to a region of WW domain-containing oxidoreductase (mouse Wwox), which is an apoptosis activator                                    |
| SWN:DB83_HUMAN P57088 homo sapiens (human). db83 protein. 8/2001 [MASS=27951]/Member of the UPF0121 uncharacterized protein family, has very strong similarity to uncharacterized rat LOC59303                                                                                                                                                                                            |
| SW:WDR1_HUMAN O75083 homo sapiens (human). wd-repeat protein 1 (actin interacting protein 1) (nori-1). 10/2001 [MASS=66194]/WD repeat domain 1, contains WD40 repeats which are believed to be involved in protein-protein interactions, may bind actin, and may be involved in hearing                                                                                                   |
| SW:GC5L_HUMAN P78537 homo sapiens (human). gcn5-like protein 1 (rt14 protein). 7/1999 [MASS=14311]/General control of amino acid synthesis-like 1 (yeast), a widely expressed protein that may be a transcriptional activator                                                                                                                                                             |
| GP:AB011145_1 Homo sapiens mRNA for KIAA0573 protein, partial cds. [MASS=51859]/Member of the thioredoxin family, which are small enzymes involved in redox reactions, has low similarity to S. cerevisiae Pdi1p, which is a protein disulfide isomerase and oxidoreductase                                                                                                               |
| SW:CC4H_HUMAN P50851 homo sapiens (human). cdc4-like protein (fragment). 7/1998 [MASS=213599]/Lipopolysaccharide-responsive and beige-like anchor, a putative protein-binding protein that contains WD-like repeats and a BEACH (BEige And CHS) domain, may play a role in vesicle transport                                                                                              |
| SW:LMO6_HUMAN O43900 homo sapiens (human). lim-only protein 6 (triple lim domain protein 6). 12/1998 [MASS=46098]/LIM domain only 6, a member of the LIM family of proteins which are involved in regulating development, protein-protein interactions and perhaps binding to nucleic acids, contains three LIM domains                                                                   |
| GPN:AF239156_1 Homo sapiens peptide deformylase-like protein mRNA, complete cds; huPD. [MASS=27013]                                                                                                                                                                                                                                                                                       |
| SW:G100_HUMAN Q16186 homo sapiens (human). 110 kDa cell membrane glycoprotein. 11/1997 [MASS=42167]/Cell membrane glycoprotein 110 kDa, putative integral plasma membrane glycoprotein, putative tumor antigen and is expressed on human gastric carcinoma cells; upregulated in response to IFNgamma (IFNG)                                                                              |
| 1 Homo sapiens mRNA for nuclear protein containing a WW domain (Npw38), complete cds. [MASS=30472]/Npw38-binding protein, interacts with the WW domain of Npw38 (PQBP1), binds poly(rG) and G-rich single-stranded DNA, interacts with nuclear or perinuclear filaments and may play a role in regulation of pre-mRNA processing                                                          |
| GP:AF151867_1 Homo sapiens CGI-109 protein mRNA, complete cds. [MASS=24354]                                                                                                                                                                                                                                                                                                               |
| SW:ME18_HUMAN P35227 homo sapiens (human). dna-binding protein mel-18 (zinc finger protein 144). 11/1995 [MASS=37788]/Zinc finger protein 144, member of the Drosophila polycomb gene group, contains a helix-loop-helix like structure and a proline and serine-rich region, putative transcription factor that may be involved in hematopoiesis                                         |
| GP:U06631_1 Human (H326) mRNA, complete cds; homologous to mouse gene PC326; GenBank Accession Number M95564. [MASS=66385]/Protein containing seven WD domains (WD-40 repeats), which may mediate protein-protein interactions, has a region of low similarity to a region of breakpoint cluster region protein uterine leiomyoma 2 (human BCRP2), which may have a housekeeping function |
| GP:AC003956_1 Homo sapiens DNA from chromosome 19, cosmid R34078, complete sequence; human homolog of acetolactate synthase; DPS similarity to Accession: gij1730288 (U61263) acetolactate synthase homolog [Homo sapiens. [MASS=67868]                                                                                                                                                   |
| SW:SC13_HUMAN P55735 homo sapiens (human). sec13-related protein. 7/1998 [MASS=35569]/SEC13 (S. cerevisiae)-like 1, a serine- and threonine-rich WD40 repeat-containing protein that plays a role in protein transport from the endoplasmic reticulum to the Golgi                                                                                                                        |
| PIR2:T46292 hypothetical protein DKFZp434E0610.1 - human (fragment) [MASS=65841]/BCL2-associated athanogene 3, interacts with the Hsc70 ATPase domain to regulate its chaperone activity, interacts with BCL2 to modulate cellular antiapoptosis, and participates in the EGF signaling pathway                                                                                           |
| GP:AF293335_1 Homo sapiens p30 DBC mRNA, complete cds; putative protein from MH0802201. [MASS=30451]                                                                                                                                                                                                                                                                                      |
| GP:AK000303_1 Homo sapiens cDNA FLJ20296 fis, clone HEP05890; unnamed protein product. [MASS=36853]/Protein of unknown function                                                                                                                                                                                                                                                           |
| PIR2:JC7515 vesicle protein sorting 29 protein - human [MASS=20506]/Vacuolar sorting protein 29, putative transporter that may play a role in retrograde transport from endosomes to the trans-Golgi network                                                                                                                                                                              |
| GP:AF068297_1 Homo sapiens HDCMD45P mRNA, partial cds. [MASS=17895]                                                                                                                                                                                                                                                                                                                       |
| GP:AB037807_1 Homo sapiens mRNA for KIAA1386 protein, partial cds; Start codon is not identified.. [MASS=135444]/Protein containing ankyrin repeats, an IBR domain, which are found in zinc finger proteins, and a C3HC4 type (RING) zinc finger, which may mediate protein-protein interactions                                                                                          |
| PIR2:T08753 hypothetical protein DKFZp586H2219.1 - human [MASS=53489]/Protein of unknown function, has strong similarity to uncharacterized rat Sca10                                                                                                                                                                                                                                     |

|                                                                                                                                                                                                                                                                                                                                                                                    |
|------------------------------------------------------------------------------------------------------------------------------------------------------------------------------------------------------------------------------------------------------------------------------------------------------------------------------------------------------------------------------------|
| GP:AK022499_1 Homo sapiens cDNA FLJ12437 fis, clone NT2RM1000118, weakly similar to CALCINEURIN B SUBUNIT; unnamed protein product. [MASS=26041]                                                                                                                                                                                                                                   |
| SW:EF1D_HUMAN P29692 homo sapiens (human). elongation factor 1-delta (ef-1-delta). 6/1994 [MASS=31221]/Eukaryotic translation elongation factor 1 delta, a guanine nucleotide exchange protein that gets hyperphosphorylated in cells infected with herpesviruses, binds HIV-1 protein Tat and causes a reduction of host mRNA translation efficiency                              |
| GP:AB037856_1 Homo sapiens mRNA for KIAA1435 protein, partial cds; Start codon is not identified.. [MASS=46908]/Protein containing two FYVE zinc finger domains, which bind phosphatidylinositol 3-phosphate, and 12 WD domains (WD-40 repeats), has a region of low similarity to a region of F-box/WD-repeat protein (C. elegans LIN-23), which regulates cell proliferation     |
| GP:AF284574_1 Homo sapiens Nit protein 2 (NIT2) mRNA, complete cds; Nit2; similar to the Nit domains of Caenorhabditis elegans NitFhit and Drosophila melanogaster NitFhit. [MASS=30608]/NIT2                                                                                                                                                                                      |
| GP:AK022868_1 Homo sapiens cDNA FLJ12806 fis, clone NT2RP2002235; unnamed protein product. [MASS=34951]/Protein of unknown function                                                                                                                                                                                                                                                |
| PIR2:T46298 hypothetical protein DKFZp43411110.1 - human (fragment) [MASS=18088]                                                                                                                                                                                                                                                                                                   |
| SW:FA5_HUMAN P12259 homo sapiens (human). coagulation factor v precursor (activated protein c cofactor). 11/1997 [MASS=251701]/Coagulation factor V, a cofactor in the prothrombinase complex that plays a role in the regulation of blood coagulation; alterations of corresponding gene are associated with activated protein C (APC) resistance, parahemophilia, and thrombosis |
| SW:SR72_HUMAN O76094 homo sapiens (human). signal recognition particle 72 kda protein (srp72). 12/1998 [MASS=74475]/Signal recognition particle 72, a ribonucleoprotein that undergoes cleavage by caspase during apoptosis; protein is an autoantigen in patients with dermatomyositis and systemic lupus erythematosus                                                           |
| GP:AF236056_1 Homo sapiens golgi membrane protein GP73 mRNA, complete cds. [MASS=45202]/Golgi phosphoprotein 2, an integral membrane Golgi protein that is epithelial cell-specific in healthy liver, upregulated in hepatocytes in both nonviral- and viral-associated liver disease including adult giant-cell hepatitis                                                         |
| GP:AF250859_1 Homo sapiens UDP-GlcNAc:alpha-D-mannoside b1,2-N-acetylglucosaminyltransferase I.2 (MGAT1.2) mRNA, partial cds; glycosyltransferase; similar to b1,2-N-acetylglucosaminyltransferase I; GnT1.2. [MASS=65499]/O-linked mannosyltransferase, has specific activity for alpha-linked terminal Man residues and is predicted to be involved in glycoprotein metabolism   |
| SW:ROH2_HUMAN P55795 homo sapiens (human). heterogeneous nuclear ribonucleoprotein h' (hnrrp h') (ftp-3). 11/1997 [MASS=49264]/Heterogeneous nuclear ribonucleoprotein H2, a putative heterogeneous nuclear ribonucleoprotein that contains three repeats that resemble the RNA recognition motif (RRM)                                                                            |
| GP:AF130092_1 Homo sapiens clone FLB9715 PRO2620 mRNA, complete cds; predicted protein of HQ2620. [MASS=53655]/Protein of unknown function, has low similarity to uncharacterized S. pombe Spac1142.01p                                                                                                                                                                            |
| SW:CN37_HUMAN P09543 homo sapiens (human). 2',3'-cyclic nucleotide 3'-phosphodiesterase (ec 3.1.4.37) (cnp) (cnpase). 5/2000 [MASS=47579]/2'3'-Cyclic nucleotide 3' phosphodiesterase, a myelin-associated phosphodiesterase that is involved in regulation of central nervous system myelination                                                                                  |
| GP:AK021647_1 Homo sapiens cDNA FLJ11585 fis, clone HEMBA1003692; unnamed protein product. [MASS=16310]/Metallophosphoesterase 1, a putative transmembrane phosphoesterase expressed only in brain                                                                                                                                                                                 |
| SW:PPAL_HUMAN P11117 homo sapiens (human). lysosomal acid phosphatase precursor (ec 3.1.3.2) (lap). 12/1992 [MASS=48344]/Lysosomal acid phosphatase, a tartrate-inhibitable lysosomal enzyme; mice lacking Acp2 are more susceptible to seizures                                                                                                                                   |
| SW:EF1B_HUMAN P24534 homo sapiens (human). elongation factor 1-beta (ef-1-beta). 6/1994 [MASS=24633]/Eukaryotic translation elongation factor 1 beta 2, putative component of the eukaryotic translation elongation complex                                                                                                                                                        |
| GP:AF226054_1 Homo sapiens GK001 (GK001) mRNA, complete cds. [MASS=55816]/Protein of unknown function, has moderate similarity to uncharacterized C. elegans ZK1058.4                                                                                                                                                                                                              |
| GP:AC005067_2 Homo sapiens BAC clone CTB-122E10 from 7q11.23-q21.1, complete sequence; Supported by Human EST H08032.1 (NID:g872854), mouse EST AA870042.1 (NID:g2965487), and genscan; H_RG122E10.2b. [MASS=39202]/Member of the rhomboid family of integral membrane proteins                                                                                                    |
| PIR2:T47174 hypothetical protein DKFZp7621166.1 - human (fragment) [MASS=31436]/Protein with high similarity to coronin 1a (human CORO1A), which is an actin-binding protein that binds to phagocyte oxidases and may transport them to the phagosome membrane, contains three WD domains (WD-40 repeat)                                                                           |
| GP:AB032993_1 Homo sapiens mRNA for KIAA1167 protein, partial cds; Start codon is not identified.; hj01786 cDNA clone for KIAA1167 has 1412-bp and 708-bp insertions (may be introns) after the positions 850 and 2258 of the sequence of KIAA1167, respectively.. [MASS=95259]/Protein of unknown function/Protein of unknown function                                            |
| GP:AJ245820_1 Homo sapiens mRNA for type I transmembrane receptor (psk-1 gene). [MASS=92455]/Protein with high similarity to murine Sez6, which is expressed in the brain and may play a role in seizure, contains five sushi or short consensus repeat domains, which are found in complement and adhesion proteins, and an extracellular CUB domain                              |
| GP:BC011524_1 Homo sapiens. Similar to hypothetical protein, clone MGC:8793 IMAGE:3872837, mRNA, complete cds. [MASS=42196]/Protein of unknown function, has moderate similarity to uncharacterized human LOC90268                                                                                                                                                                 |
| GP:AK023834_1 Homo sapiens cDNA FLJ13772 fis, clone PLACE4000300; unnamed protein product. [MASS=72580]/Protein of unknown function                                                                                                                                                                                                                                                |

|                                                                                                                                                                                                                                                                                                                                                                                                                                           |
|-------------------------------------------------------------------------------------------------------------------------------------------------------------------------------------------------------------------------------------------------------------------------------------------------------------------------------------------------------------------------------------------------------------------------------------------|
| SW:LYII_HUMAN Q14108 homo sapiens (human). lysosome membrane protein ii (limp ii) (85 kda lysosomal membrane sialoglycoprotein) (lgp85) (cd36 antigen-like 2). 7/1998 [MASS=54159]/Lysosomal integral membrane protein II, a lysosomal membrane sialoglycoprotein with similarity to CD36 antigen                                                                                                                                         |
| PIR2:T47160 hypothetical protein DKFZp762K0911.1 - human [MASS=23897]/Ras-related GTP-binding protein 14, putative GTP binding protein and GTPase, induced in lung fibroblasts in response to endothelin treatment                                                                                                                                                                                                                        |
| GP:AJ293573_1 Homo sapiens mRNA for zinc finger protein Cezanne (CEZANNE gene). [MASS=94401]/of unknown function, has a region of low similarity to a region of tumor necrosis factor alpha-induced protein 3 (mouse Tnfaip3), which is a cytoplasmic protein that blocks NF-kappaB activation and inhibits Tnf-induced apoptosis and necrosis                                                                                            |
| GP:AK025999_1 Homo sapiens cDNA: FLJ22346 fis, clone HRC06158; unnamed protein product. [MASS=81877]/Member of the ubiquitin-conjugating enzyme (E2) family, which catalyze the covalent attachment of ubiquitin to target proteins, has a region of moderate similarity to a region of mouse Birc6, which is a ubiquitin-conjugating enzyme                                                                                              |
| SW:SP02_HUMAN Q92796 homo sapiens (human). presynaptic protein sap102 (synapse-associated protein 102) (neuroendocrine-dlg) (ne-dlg). 5/2000 [MASS=90344]/Discs large (Drosophila) homolog 3 (neuroendocrine-dlg), putative guanylate kinase, inhibits cell proliferation, acts in neuronal cell adhesion, may facilitate neoplasm development or progression; corresponding gene is upregulated in ovarian carcinomas                    |
| GP:AB037728_1 Homo sapiens mRNA for KIAA1307 protein, partial cds; Start codon is not identified.. [MASS=186192]/Protein containing two putative zinc finger in N-recognition domains                                                                                                                                                                                                                                                     |
| SW:SPC1_HUMAN Q15005 homo sapiens (human). microsomal signal peptidase 25 kda subunit (ec 3.4.-.-) (spc25) (kiaa0102). 5/2000 [MASS=25003]/Protein of unknown function                                                                                                                                                                                                                                                                    |
| PIR2:G01447 GP36b glycoprotein - human [MASS=40229]/Protein of unknown function, has moderate similarity to a region of human LMAN1, which is a mannose-binding lectin involved in the traffic of glycoproteins between endoplasmic reticulum and the Golgi apparatus, and associated with a coagulation disorder                                                                                                                         |
| SW:TGT_HUMAN P54578 homo sapiens (human). queuine trna-ribosyltransferase (ec 2.4.2.29) (trna-guanine transglycosylase) (guanine insertion enzyme). 5/2000 [MASS=55938]/tRNA-guanine transglycosylase, catalyses the exchange of queuine for guanine in the first position of the anticodon of tRNAs for asparagine, aspartic acid, histidine and tyrosine                                                                                |
| GP:AB014555_1 Homo sapiens mRNA for KIAA0655 protein, partial cds. [MASS=120902]/Huntingtin interacting protein 1 related protein, putative actin-binding protein predicted to be involved in actin polymerization, interacts with HIP1 but not Huntingtin (HD)                                                                                                                                                                           |
| PIR2:T46375 hypothetical protein DKFZp434D1319.1 - human [MASS=49166]                                                                                                                                                                                                                                                                                                                                                                     |
| PIR2:I52882 autoantigen - human [MASS=131858]/Protein of unknown function                                                                                                                                                                                                                                                                                                                                                                 |
| GP:AB037773_1 Homo sapiens mRNA for KIAA1352 protein, partial cds; Start codon is not identified.. [MASS=138362]/                                                                                                                                                                                                                                                                                                                         |
| GP:AB020697_1 Homo sapiens mRNA for KIAA0890 protein, complete cds. [MASS=133938]/Protein containing two helicase conserved C-terminal domains and four double-stranded RNA binding domains, 6), has a region of low similarity to a region of S. pombe Cdc28p, which is an ATP-dependent RNA helicase involved in cell cycle progression                                                                                                 |
| GP:AK022827_1 Homo sapiens cDNA FLJ12765 fis, clone NT2RP2001511, moderately similar to Homo sapiens putative RNA-binding protein Q99 mRNA; unnamed protein product. [MASS=97330]/Protein with high similarity to C. elegans ALG-1, which is a piwi-related protein involved in the production of stRNA (small temporal RNA) of LIN-4, contains a PAZ (Piwi, Argonaut and Zwillie) domain, which may mediate protein-protein interactions |
| GP:U25756_1 Human Ki nuclear autoantigen gene, partial cds; region of similarity to Ki nuclear autoantigen mRNA sequence, GenBank Accession Number U11292. [MASS=6323]                                                                                                                                                                                                                                                                    |
| SW:CUTC_HUMAN P01034 homo sapiens (human). cystatin c precursor (neuroendocrine basic polypeptide) (gamma-trace) (post-gamma-globulin). 5/2000 [MASS=15799]/Cystatin C, a cysteine protease inhibitor regulated by TGFB1, may have roles in vascular remodeling and disease; mutations in the gene cause hereditary cystatin C amyloid angiopathy, in which amyloid aggregates form in the brain                                          |
| GP:AK023618_1 Homo sapiens cDNA FLJ13556 fis, clone PLACE1007705, moderately similar to Mus musculus mRNA for Ndr1 related protein Ndr3; unnamed protein product. [MASS=31484]/Protein with high similarity to human NDRG1, which is induced by nickel, homocysteine, 2-mercaptoethanol, and tunicamycin and is induced during colon carcinoma cell line differentiation                                                                  |
| SW:TBA4_HUMAN P05215 homo sapiens (human), macaca fascicularis (crab eating macaque) (cynomolgus monkey), and mus musculus (mouse). tubulin alpha-4 chain. 7/1999 [MASS=49924]/Member of the tubulin-FtzA family, which are involved in polymer formation, has strong similarity to a region of mouse Tuba6, which is a structural protein that polymerizes to form microtubules                                                          |
| GP:AF129332_1 Homo sapiens MUM2 (MUM2) gene, complete cds; similar to Saccharomyces cerevisiae bet5. [MASS=16832]/Protein with low similarity to S. cerevisiae Bet5p, which is a subunit of both the Transport Protein Particle I complex involved in vesicular transport from endoplasmic reticulum to Golgi and the Transport Protein Particle II involved in Golgi trafficking                                                         |
| PIR2:T17237 hypothetical protein DKFZp434P106.1 - human (fragment) [MASS=28268]/Protein of unknown function, has high similarity to uncharacterized mouse 6330583M11Rik                                                                                                                                                                                                                                                                   |
| SW:ANX6_HUMAN P08133 homo sapiens (human). annexin vi (lipocortin vi) (p68) (p70) (protein iii) (chromobindin 20) (67 kda calelectrin) (calphobindin-ii) (cpb-ii). 5/2000 [MASS=75742]/Annexin VI, member of the annexin family of calcium-dependent phospholipid binding proteins that shift between soluble and membrane associated states; involved in the budding of clathrin coated pits and may play a role in tumor suppression    |

|                                                                                                                                                                                                                                                                                                                                                                                                                                                                       |
|-----------------------------------------------------------------------------------------------------------------------------------------------------------------------------------------------------------------------------------------------------------------------------------------------------------------------------------------------------------------------------------------------------------------------------------------------------------------------|
| GP:BC012058_1 Homo sapiens, hypothetical protein FLJ12701, clone MGC:19885 IMAGE:4554033, mRNA, complete cds. [MASS=37535]/Protein containing a double-stranded RNA binding domain                                                                                                                                                                                                                                                                                    |
| GP:AB033097_1 Homo sapiens mRNA for KIAA1271 protein, partial cds; Start codon is not identified.. [MASS=56670]/Protein of unknown function                                                                                                                                                                                                                                                                                                                           |
| GP:AK002163_1 Homo sapiens cDNA FLJ11301 fis, clone PLACE1009908, weakly similar to HYPOTHETICAL GTP-BINDING PROTEIN IN SEH1-PRP20 INTERGENIC REGION; unnamed protein product. [MASS=73142]/Member of an uncharacterized GTPase family, has moderate similarity to yeast YGL099W, which is required for normal growth, morphology, mating, and sporulation                                                                                                            |
| PIR2:T00050 hypothetical protein KIAA0400 - human [MASS=111651]/Development and differentiation enhancing factor 2 (Pyk2 C terminus-associated protein), phosphatidylinositol-4,5-bisphosphate-dependent ARF GTPase activator, binds Src kinases and PYK2 (PTK2B), inhibits paxillin (PXN) recruitment to focal adhesions                                                                                                                                             |
| SW:ACTY_HUMAN P42025 homo sapiens (human). beta-centractin. 7/1999 [MASS=42293]/Beta centractin, a member of the centractin family of actin-related proteins, a subunit of the dynactin complex which functions in the cytoplasmic dynein-driven organelle movement along microtubules                                                                                                                                                                                |
| PIR2:T46333 hypothetical protein DKFZp434J1813.1 - human (fragment) [MASS=53778]                                                                                                                                                                                                                                                                                                                                                                                      |
| SW:LEGU_HUMAN Q99538 homo sapiens (human). legumain precursor (ec 3.4.22.34) (asparaginyl endopeptidase). 12/1998 [MASS=49411]/Protease cysteine 1 (legumain), a lysosomal cysteine endopeptidase that hydrolyzes asparaginyl bonds, inhibits osteoclast differentiation, may play a role in antigen processing for MHC class II presentation                                                                                                                         |
| GP:AK025520_1 Homo sapiens cDNA: FLJ21867 fis, clone HEP02419; unnamed protein product. [MASS=60579]/Protein with strong similarity to peripheral benzodiazepine receptor associated protein 7 (mouse Pap7), which binds peripheral-type benzodiazepine receptor (Bzrp) and functions in regulation of steroidogenesis, contains an acyl CoA binding domain                                                                                                           |
| GPN:AF060511_1 Homo sapiens clone O16b10 My016 protein mRNA, complete cds.[MASS=10117]                                                                                                                                                                                                                                                                                                                                                                                |
| PIR2:PH0268 epidermal autoantigen 450K (clone pE450-C/D) - human (fragment) [MASS=73263]/Epiplakin 1, a member of the plakin family of proteins that bind to cytoplasmic intermediate filaments; autoantigens to the protein are present in patients with a subepidermal blistering disease that resembles bullous pemphigoid                                                                                                                                         |
| GP:Z74021_1 Human DNA sequence from clone SC22CB-1E7 on chromosome 22 Contains the RPS17L4 gene for Ribosomal protein S17-like 4, exons 1 and 2 of the SLC5A1 gene for solute carrier family 5 (sodium/glucose cotransporter) member 1 (High Affinity Sodium-Glucose C [MASS=15602]                                                                                                                                                                                   |
| GP:AJ245621_1 Homo sapiens CTL2 gene. [MASS=80138]/Protein of unknown function, has high similarity to uncharacterized mouse 2210409B01Rik                                                                                                                                                                                                                                                                                                                            |
| GP:AC005154_1/Protein of unknown function, has moderate similarity to uncharacterized C. elegans C44B7.7                                                                                                                                                                                                                                                                                                                                                              |
| GP:X87832_1 Homo sapiens mRNA for partial NOV/plexin-A1 protein. [MASS=194818]/Plexin A1, acts as a coreceptor with neuropilin (NRP1) for semaphorins, which are signaling molecules controlling cell repulsion                                                                                                                                                                                                                                                       |
| SW:YCE7_HUMAN Q9y3e5 homo sapiens (human). hypothetical protein cgi-147. 5/2000 [MASS=19194]                                                                                                                                                                                                                                                                                                                                                                          |
| GP:AF137372_1 Homo sapiens ras-related protein RAB18 mRNA, complete cds. MASS=22977/Ras-related GTP-binding protein 18, putative GTP binding protein and GTPase, may be involved in vesicle transport and may play a role in inflammation                                                                                                                                                                                                                             |
| SW:ANXA_HUMAN P50995 homo sapiens (human). annexin xi (calyculin-associated annexin 50) (cap-50) (56 kda autoantigen). 5/2000 [MASS=54390]/Annexin A10, a liver-specific member of the annexin family of calcium-dependent phospholipid-binding proteins that typically have a role in inositol phosphate metabolism; downregulation correlates with high grade and high stage hepatocellular carcinoma                                                               |
| GP:AK001243_1 Homo sapiens cDNA FLJ10381 fis, clone NT2RM2002055; unnamed protein product. [MASS=49582]/Protein of unknown function                                                                                                                                                                                                                                                                                                                                   |
| SWN:RTN4_HUMAN Q9nqc3 homo sapiens (human). reticulon 4 (neurite outgrowth inhibitor) (nogo protein) (foocen) (neuroendocrine-specific protein)(nsp) (neuroendocrine specific protein c homolog) (rtn-x) ( [MASS=129931]/Reticulon 4, ligand for RTN4R, inhibits axon regeneration in adult CNS but not PNS, yet peptide derivative NEP1-40 acts as an antagonist and promotes axonal regeneration and may have therapeutic potential                                 |
| PIR2:T46272 hypothetical protein DKFZp564L0864.1 - human (fragment) [MASS=20191]/Protein with high similarity to uncharacterized mouse Hiat1                                                                                                                                                                                                                                                                                                                          |
| PIR2:T46254 hypothetical protein DKFZp761H171.1 - human [MASS=28611]/Protein with high similarity to S. cerevisiae Gtr2p, which is a putative small GTPase involved in nucleocytoplasmic transport                                                                                                                                                                                                                                                                    |
| SW:DSR3_HUMAN O14972 homo sapiens (human). down syndrome critical region protein 3. 5/2000 [MASS=33010]/Down syndrome critical region gene 3, a ubiquitously expressed protein; the corresponding gene is located in the Down syndrome critical region of chromosome 21                                                                                                                                                                                               |
| SW:SKP1_HUMAN P34991 homo sapiens (human), and cavia porcellus (guinea pig). cyclin a/cdk2-associated protein p19 (rna polymerase ii elongation factor-like protein) (organ of corti protein 2) (ocp-ii pr [MASS=18527]/S-phase kinase-associated protein 1A (p19A), component of Cbf3 kinetochore and SCF (Skp1p-cullin-F-box) complexes which target many cell cycle dependent proteins for ubiquitin-dependent degradation, deregulation may lead to tumorigenesis |
| SW:TBB1_HUMAN P07437 homo sapiens (human). tubulin beta-1 chain. 7/1999 [MASS=49759]/Protein with high similarity to beta-2 tubulin (rat Tubb2), which plays a role in the response to wounding and possibly in axonal outgrowth and regeneration, member of the tubulin-Ftza family, which are involved in polymer formation                                                                                                                                         |

|                                                                                                                                                                                                                                                                                                                                                                                                       |
|-------------------------------------------------------------------------------------------------------------------------------------------------------------------------------------------------------------------------------------------------------------------------------------------------------------------------------------------------------------------------------------------------------|
| <p>SW:TBL2_HUMAN Q9y4p3 homo sapiens (human). transducin beta-like 2 protein (ws beta-transducin repeats protein) (ws-beta2rp). 10/2001 [MASS=49798]/Protein containing five WD domains (WD-40 repeat), which may mediate protein-protein interactions, has weak similarity to human CIAO1, which interacts with and inhibits Wilms tumor suppressor protein (human WT1) transactivation activity</p> |
| <p>GP:AL049795_2 Human DNA sequence from clone RP4-622L5 on chromosome 1p34.2-36.11. Contains the gene for importin alpha 7 (karyopherin), up to six novel genes and the 5' end of the EIF3S2 gene for eukaryotic translation initiation factor 3 beta. Contains ESTs, STSs [MASS=41648]</p>                                                                                                          |
| <p>GP:AB011163_1 Homo sapiens mRNA for KIAA0591 protein, partial cds. [MASS=151594]/Kinesin family member 1B, a putative motor protein involved in synaptic vesicle transport; mutation of the gene underlies Charcot-Marie-Tooth type 2A peripheral neuropathy</p>                                                                                                                                   |
| <p>SW:KNLC_HUMAN Q07866 homo sapiens (human). kinesin light chain (klc). 10/1996 [MASS=64786]/Kinesin light chain, member of a family of microtubule-associated motor proteins that function in intracellular transport and mitosis; has very strong similarity to murine Klc1, which is abundantly expressed in the axons of sciatic nerve</p>                                                       |
| <p>GP:AF272357_1 Homo sapiens NPDC1-like protein (NPDC1) mRNA, complete cds; similar to mouse NPDC1. [MASS=34507]/Protein of unknown function, has a region of low similarity to a region of C. elegans CAB-1, which is a component of a neuronal transmission pathway that affects defecation and locomotion</p>                                                                                     |
| <p>GP:AB040882_1 Homo sapiens mRNA for KIAA1449 protein, partial cds; Start codon is not identified.. [MASS=68085]/Protein containing six WD domains (WD-40 repeats), which may mediate protein-protein interactions, has a region of low similarity to a region of platelet-activating factor acetylhydrolase isoform 1b alpha subunit (45kD) (human PAFAH1B1)</p>                                   |
| <p>GP:AF226045_1 Homo sapiens GK002 (GK002) mRNA, complete cds. [MASS=41280]/Mitochondrial ribosomal protein S22, a putative component of the mitochondrial small 28S ribosomal subunit</p>                                                                                                                                                                                                           |
| <p>GP:D42085_1 Human mRNA for KIAA0095 gene, complete cds; KIAA0095 gene is related to S.cerevisiae NIC96 gene.. [MASS=93488]/Protein with low similarity to S. cerevisiae Nic96p, which is a nuclear pore protein (nucleoporin) that acts in a complex with S. cerevisiae Nsp1p, Nup57p, and Nup49p</p>                                                                                              |
| <p>GP:AF151069_1 Homo sapiens HSPC235 mRNA, complete cds. [MASS=40152]/Mitochondrial ribosomal protein L37, putative component of the large subunit (39S) of the mitochondrial ribosome</p>                                                                                                                                                                                                           |
| <p>PIR2:T50639 synaptic glycoprotein SC2, spliced variant [imported] - human [MASS=36061]/Member of the 3-oxo-5-alpha-steroid 4-dehydrogenase family, which are involved in dihydrotestosterone biosynthesis</p>                                                                                                                                                                                      |
| <p>SW:PHB_HUMAN P35232 homo sapiens (human). prohibitin. 12/1998 [MASS=29804]/Prohibitin, mitochondrial suppressor of cell proliferation that binds to Rb family members RB1, RBL1, and RBL2, represses E2F-induced transcription; gene is mutated in sporadic breast cancer and expression is elevated in endometrial adenocarcinoma</p>                                                             |
| <p>PIR2:T00345 hypothetical protein KIAA0590 - human [MASS=165197]/Protein containing two WD domains (WD-40 repeats), which may mediate protein-protein interactions, has low similarity to C. elegans CHE-11, which is required for normal ciliary development, dauer larva formation, and chemotaxis</p>                                                                                            |
| <p>GP:AK001718_1 Homo sapiens cDNA FLJ10856 fis, clone NT2RP4001547; unnamed protein product. [MASS=40684]/Protein with moderate similarity to S. cerevisiae Cdc50p, which is a protein that functions in cell cycle control, transcription regulation from the Pol II promoter, and is associated with a cell-division-cycle (CDC) phenotype when mutated</p>                                        |
| <p>GP:AB018270_1 Homo sapiens mRNA for KIAA0727 protein, partial cds. [MASS=78790]/Protein containing two IQ calmodulin-binding motifs and a myosin head (motor domain), has very strong similarity to a region of rat Myo1c, which is an unconventional Class I myosin heavy chain that binds calmodulin and may be involved in neurogenesis</p>                                                     |
| <p>GP:AB015631_1 Homo sapiens mRNA for type II membrane protein, complete cds, clone:HP10390. [MASS=20652]/Transmembrane protein 4, a putative type II membrane protein</p>                                                                                                                                                                                                                           |
| <p>GP:AF155658_1 Homo sapiens putative 55 kDa protein mRNA, complete cds. [MASS=55003]/Member of the uncharacterized protein family UPF0027, has high similarity to uncharacterized C. elegans F16A11.2</p>                                                                                                                                                                                           |
| <p>SW:TRM1_HUMAN Q9nxx9 homo sapiens (human). probable n2,n2-dimethylguanosine trna methyltransferase (ec 2.1.1.32) (trna(guanine-26,n2,n2) methyltransferase) (trna 2,2- dimethylguanosine-26 methyltransferase [MASS=72234]</p>                                                                                                                                                                     |
| <p>GP:AL451015_9 Neurospora crassa DNA linkage group V BAC clone B13O20; weak similarity to g-alpha interacting protein, homo sapiens, SWISSPROT:GAIP_HUMAN contains EST gb:AW708419, AW708418, AI330099, AI330098. [MASS=16236]</p>                                                                                                                                                                  |
| <p>GP:AB033011_1 Homo sapiens mRNA for KIAA1185 protein, partial cds; Start codon is not identified.. [MASS=44499]/Protein containing a leucine rich repeat, which mediates protein-protein interactions, has a region of low similarity to a region of phenylalanyl-tRNA synthetase beta-subunit (human PheHB), which is involved in protein synthesis and possibly tumorigenesis</p>                |
| <p>SW:HEXB_HUMAN P07686 homo sapiens (human). beta-hexosaminidase beta chain precursor (ec 3.2.1.52) (n-acetyl-beta-glucosaminidase) (beta-n-acetylhexosaminidase) (hexosaminidase a). 5/2000 [MASS=63111]/Hexosaminidase B beta polypeptide, a subunit of a lysosomal enzyme that hydrolyzes the ganglioside GM2; mutations in the gene cause Sandhoff disease, a lysosomal storage disorder</p>     |
| <p>GP:AF151062_1 Homo sapiens HSPC228 mRNA, complete cds. [MASS=33677]</p>                                                                                                                                                                                                                                                                                                                            |
| <p>SW:VATG_HUMAN O75348 homo sapiens (human). vacuolar atp synthase subunit g (ec 3.6.1.34) (v-atpase 13 kda subunit) (vacuolar h(+)-atpase subunit g) (vacuolar atp synthase subunit m16). 5/2000 [MASS=13758]/Member of the vacuolar (H+)-ATPase G subunit family, which may couple ATP degradation to H+ translocation, has high similarity to uncharacterized human ATP6G2</p>                    |



|                                                                                                                                                                                                                                                                                                                                                                                                                                                     |
|-----------------------------------------------------------------------------------------------------------------------------------------------------------------------------------------------------------------------------------------------------------------------------------------------------------------------------------------------------------------------------------------------------------------------------------------------------|
| SW:RS3_HUMAN P23396 homo sapiens (human). 40s ribosomal protein s3. 2/1996 [MASS=26688]/Ribosomal protein S3, a putative component of the small 40S ribosomal subunit, has DNA endonuclease activity, endonuclease activity is absent in Xeroderma pigmentosum group D patients, expression is increased in colorectal cancer                                                                                                                       |
| GP:AK022956_1 Homo sapiens cDNA FLJ12894 fis, clone NT2RP2004170, moderately similar to Homo sapiens mRNA for transducin (beta) like 1 protein; unnamed protein product. [MASS=55569]/Protein with strong similarity to transducin (beta)-like 1 (human TBL1), which binds histone H3 and is part of the SMRT corepressor complex and may be involved in vision and hearing, contains eight WD domains (WD-40 repeats)                              |
| PIR2:S55474 Human giant larvae homolog - human [MASS=112908]/Protein with high similarity to lethal giant larvae (Drosophila) homolog 1 (human LGL1), which is a nonmuscle myosin II heavy chain-associating cytoskeletal protein that may be linked to Smith-Magenis Syndrome, contains three WD domains (WD-40 repeats)                                                                                                                           |
| SW:1A01_HUMAN P30443 homo sapiens (human). hla class i histocompatibility antigen, a-1 alpha chain precursor. 5/2000 [MASS=40846]/Major histocompatibility complex class I-A, binds antigenic peptides, associates with beta 2-microglobulin (B2M) to form a complex that contributes to self-recognition by cytotoxic T lymphocytes                                                                                                                |
| GP:AB038995_1 Homo sapiens mRNA for RAB-8b protein, complete cds. [MASS=23584]/Member of the Ras superfamily of GTP-binding proteins, has very strong similarity to rat Rn.10995 (Rab8b), which is a member of the Rab family of small GTP binding proteins                                                                                                                                                                                         |
| GP:AK001050_1 Homo sapiens cDNA FLJ10188 fis, clone HEMBA1004693; unnamed protein product. [MASS=30704]/Protein of unknown function                                                                                                                                                                                                                                                                                                                 |
| SW:2ABA_HUMAN Q00007 h serine/threonine protein phosphatase 2a, 55 kda regulatory subunit b, alpha isoform (pp2a, subunit b, b-alpha isoform) (pp2a, subunit b, b55-alpha isoform) (pp2a, subunit b, pr55- [MASS=51692]/Protein phosphatase 2 regulatory subunit B alpha isoform, determines the substrate affinity and regulates the kinetics of protein phosphatase 2, expression is decreased in the hippocampus of Alzheimer's disease patients |
| GP:AK024781_1 Homo sapiens cDNA: FLJ21128 fis, clone CAS06258; unnamed protein product. [MASS=56106]/Member of the YjeF-related protein N-terminus containing family, has weak similarity to uncharacterized C. albicans Orf6.                                                                                                                                                                                                                      |
| GP:AB018790_1 Homo sapiens gene, complete cds, similar to Caenorhabditis elegans C42C1.9 gene sequence; similar to Caenorhabditis elegans C42C1.9 gene sequence in GenBank Accession Number AF043695. [MASS=37840]                                                                                                                                                                                                                                  |
| GP:AK002135_1 Homo sapiens cDNA FLJ11273 fis, clone PLACE1009338; unnamed protein product. [MASS=31113]/Protein of unknown function, has high similarity to uncharacterized human MGC5576                                                                                                                                                                                                                                                           |
| GP:AF271388_1 Homo sapiens CMP-N-acetylneuraminic acid synthase mRNA, complete cds. [MASS=48379]/Protein with strong similarity to cytidine monophospho-N-acetylneuraminic acid synthetase (mouse Cmas), which generates the activated sugar nucleotide CMP-N-acetylneuraminic acid for use by sialyltransferases, member of the cytidyltransferase                                                                                                 |
| GP:AB033767_1 Homo sapiens BSCv mRNA, partial cds; brain-selective and closely mapped on the counter allele of CMAP in cystatin cluster. [MASS=47746]/Member of the strictosidine synthase family, which catalyze the condensation of tryptamine with secologanin to form strictosidine, has low similarity to uncharacterized C. elegans F57C2.5                                                                                                   |
| SWN:TALI_HUMAN Q9y490 homo sapiens (human). talin. 8/2001 [MASS=269718]/Talin 1, a component of focal adhesion sites, links integrins to the actin cytoskeleton, binds phospholipids, and mediates other interactions at the cytoplasmic face of cell/matrix contacts, important for cell spreading and motility                                                                                                                                    |
| SWN:PM5P_HUMAN Q15155 homo sapiens (human). protein pm5 precursor. 8/2001 [MASS=134321]/Protein of unknown function, has low similarity to uncharacterized C. elegans C02E11.1                                                                                                                                                                                                                                                                      |
| GPN:AL136131_4 Human DNA sequence from clone RP1-261G23 on chromosome 6p12.2-21.1 Contains ESTs, STSs, GSSs and CpG islands. Contains the KIAA0110 gene, two novel genes, a novel pseudogene similar to OPA-interacting protein (OIP1), a putative novel gene, and the VE [MASS=22184]/Mitochondrial ribosomal protein S18A, component of the small (28S) ribosomal subunit of mitochondria                                                         |
| PIR2:T42646 hypothetical protein DKFZp727K171.1 - human (fragment) [MASS=64691]/Protein of unknown function, has a region of moderate similarity to a region of Sjogren syndrome antigen B (human SSB), which is an RNA-binding protein that regulates translation and is associated with Sjogren syndrome and systemic lupus erythematosus                                                                                                         |
| GP:AB014729_1 Homo sapiens mRNA for SMAP-1, complete cds; tetratricopeptide repeat (TPR motif). [MASS=101675]/Protein containing two putative arf GTPase activation (GAP) domains, which have C-4 class zinc fingers, has a region of moderate similarity to a region of centaurin-alpha (human CENTA1), which is a PtdIns(3,4,5)P3-binding protein                                                                                                 |
| SW:COPD_HUMAN P48444 homo sapiens (human). coatomer delta subunit (delta-coat protein) (delta-cop) (archain). 11/1997 [MASS=57210]/Archain 1, a putative structural protein that is ubiquitously expressed and may play a role in intracellular protein trafficking                                                                                                                                                                                 |
| GP:AB046829_1 Homo sapiens mRNA for KIAA1609 protein, partial cds; Start codon is not identified.. [MASS=52735]/Protein of unknown function                                                                                                                                                                                                                                                                                                         |
| SW:PTPA_HUMAN P18433 homo sapiens (human). protein-tyrosine phosphatase alpha precursor (ec 3.1.3.48) (r-ptp- alpha). 5/2000 [MASS=90600]/Phosphotyrosyl phosphatase activator, regulatory subunit of protein phosphatase 2A, involved in cell cycle control and may protect against oxidative DNA damage                                                                                                                                           |
| SWN:UNRI_HUMAN Q9y3f4 homo sapiens (human). unr-interacting protein (wd-40 repeat protein pt-wd). 8/2001 [MASS=38438]/Unr-interacting protein, has WD domain, interacts with unr (NR1H2) protein and may function in the transforming growth receptor signaling pathway; upregulated in breast cancer and may contribute to tumor progression                                                                                                       |

|                                                                                                                                                                                                                                                                                                                                                                    |
|--------------------------------------------------------------------------------------------------------------------------------------------------------------------------------------------------------------------------------------------------------------------------------------------------------------------------------------------------------------------|
| GP:AC005788_1 Homo sapiens chromosome 19, cosmid R26652, complete sequence; protein tyrosine phosphatase sigma. [MASS=157056]                                                                                                                                                                                                                                      |
| GP:AK000330_1 Homo sapiens cDNA FLJ20323 fis, clone HEP09648; unnamed protein product. [MASS=64016]/Protein containing three WD domains (WD-40 repeats), which likely mediate protein-protein interactions                                                                                                                                                         |
| GP:AB037855_1 Homo sapiens mRNA for KIAA1434 protein, partial cds; Start codon is not identified.. [MASS=76634]/Member of the glycerophosphoryl diester phosphodiesterase family, which are involved in lipid metabolism, contains a starch binding domain, which are found in glycosyl hydrolases, has low similarity to uncharacterized C. elegans T05H10.7      |
| PIR2:T08729 RING zinc finger protein homolog DKFZp566H073.1 - human (fragment) [MASS=35718]/Protein containing a C3HC4 type (RING) zinc finger and a PA (protease associated) domain, has a region of moderate similarity to a region of RING zinc finger protein 12 (mouse Rnf12), which is a corepressor of LIM that binds to LIM domains                        |
| GPN:AK017745_1 Mus musculus 8 days embryo whole body cDNA, RIKEN full-length enriched library, clone:5730502D15:homolog to human DJ402G11.4 (NOVEL PROTEIN SIMILAR TO C. ELEGANS F38A5.2 (ISOFORM 2)) (FRAGMENT), full insert sequence; data source:SPTR, source key:Q9UG [MASS=46538]                                                                             |
| GP:AF005888_1 Homo sapiens COX4L mRNA, complete cds. [MASS=23773]/Neighbor of COX4, ubiquitously expressed, contains potential binding sites for Sp1 and NRF-2/GABP                                                                                                                                                                                                |
| SW:T9S3_HUMAN Q9hd45 homo sapiens (human). transmembrane 9 superfamily protein member 3 precursor (sm-11044 binding protein) (ep70-p-iso). 10/2001 [MASS=67888]/SM-11044 binding protein, member of the transmembrane protein 9 superfamily, a predicted integral membrane protein which has functional ligand binding properties                                  |
| GP:AB020694_1 Homo sapiens mRNA for KIAA0887 protein, partial cds. [MASS=52421]/Protein containing a UBX domain, which are found in ubiquitin regulatory proteins                                                                                                                                                                                                  |
| GP:U47924_19 Human chromosome 12p13 sequence, complete sequence; similar to S. cerevisiae ORF YOR175c, encoded by GenBank Accession Number Z75083. [MASS=44122]/Member of the membrane bound O-acyl transferase (MBOAT) family, which are found in acyltransferase enzymes, has strong similarity to uncharacterized mouse Grcc3f                                  |
| GP:AF161380_1 Homo sapiens HSPC262 mRNA, partial cds. [MASS=20619]                                                                                                                                                                                                                                                                                                 |
| SW:DDX3_HUMAN O00571 homo sapiens (human). dead box protein 3 (helicase-like protein 2) (hlp2) (dead box, x isoform). 7/1999 [MASS=73243]/DEAD box protein 3, a member of the DEAD/H box ATP-dependent RNA helicase protein family, interacts with Hepatitis C virus core protein; corresponding gene is found on X chromosomes and escapes X-inactivation         |
| PIR2:T08769 hypothetical protein DKFZp586K011.1 - human (fragment) [MASS=81441]/Protein with strong similarity to rat Mbc2, which localizes to microsomes and plasma membranes and is expressed ubiquitously                                                                                                                                                       |
| PIR2:T08787 probable testin DKFZp586B2022.1 - human (fragment) [MASS=15593]/Protein containing three LIM domains, has a region of low similarity to a region of four and a half LIM domains 2 (human FHL2), which is a apoptosis and transcription regulator that is downregulated in rhabdomyosarcoma cell lines                                                  |
| SW:Y041_HUMAN Q15057 homo sapiens (human). hypothetical protein kiaa0041 (fragment). 7/1999 [MASS=71243]/Centaurin beta 2, a GTPase activating protein for ARF6, stimulated by phosphatidic acid and PIP2, and acts in the cell periphery to affect the actin cytoskeleton                                                                                         |
| GP:AF078860_1 Homo sapiens PTD007 mRNA, complete cds. [MASS=16661]/Mitochondrial ribosomal protein L42, component of the large ribosomal subunit                                                                                                                                                                                                                   |
| no_description_avail/Protein containing many ankyrin (Ank) repeats, which may mediate protein-protein interactions, has low similarity to a region of ankyrin (rat Ank3), which binds Na <sup>+</sup> /K <sup>+</sup> -ATPase and links integral membrane proteins to the cytoskeleton                                                                             |
| GP:AK000325_1 Homo sapiens cDNA FLJ20318 fis, clone HEP08704; unnamed protein product. [MASS=62816]/Protein of unknown function                                                                                                                                                                                                                                    |
| GP:AB046774_1 Homo sapiens mRNA for KIAA1554 protein, partial cds; Start codon is not identified.. [MASS=150426]/Protein containing a C3HC4 type (RING) zinc finger, which may mediate protein-protein interactions                                                                                                                                                |
| no_description_avail/Protein of unknown function, has low similarity to a region of threonyl-tRNA synthetases                                                                                                                                                                                                                                                      |
| GP:U97519_1 Homo sapiens podocalyxin-like protein mRNA, complete cds. [MASS=55596]/Podocalyxin like, a transmembrane sialomucin that is an L selectin ligand and important for lymphocyte adhesion and homing                                                                                                                                                      |
| GP:AJ011129_1 Homo sapiens mRNA for 17kD fetal brain protein; ORF1. [MASS=17218]/Member of the SCP-like extracellular protein family, has moderate similarity to a region of S. cerevisiae Pry3p, which shows daughter-specific expression and may have a role in mating efficiency                                                                                |
| GP:AC007055_5 Homo sapiens chromosome 14 clone BAC 201F1 map 14q24.3, complete sequence; unknown; This gene is predicted by Genscan and supported by ESTs AA836348 and AI077817. The closes. [MASS=35283]                                                                                                                                                          |
| GP:AJ131186_1 Homo sapiens mRNA for nuclear matrix protein NMP200; related to splicing factor PRP19. [MASS=55181]/Protein containing six WD domains (WD-40 repeats), which may mediate protein-protein interactions, has weak similarity to non-snRNP spliceosome component (S. cerevisiae Prp19p), which is involved in mitotic recombination and gene conversion |
| no_description_avail/Reticulon 3, member of the reticulon (neuroendocrine-specific, NSP) family of proteins that associate with the endoplasmic reticulum, most highly expressed in brain                                                                                                                                                                          |
| PIR2:T12456 hypothetical protein DKFZp564M2423.1 - human [MASS=42427]                                                                                                                                                                                                                                                                                              |
| no_description_avail/Zinc-finger protein-like 1, a putative transcription regulator with zinc-finger-like domains and leucine-zipper-like motifs, expressed strongly (and perhaps exclusively) in the exocrine (but not the endocrine) pancreas                                                                                                                    |

|                                                                                                                                                                                                                                                                                                                                                                                                                                                                                                      |
|------------------------------------------------------------------------------------------------------------------------------------------------------------------------------------------------------------------------------------------------------------------------------------------------------------------------------------------------------------------------------------------------------------------------------------------------------------------------------------------------------|
| SW:RBP2_HUMAN P49792 homo sapiens (human). ran-binding protein 2 (nuclear pore complex protein nup358) (nucleoporin nup358) (358 kda nucleoporin) (p270). 5/2000 [MASS=358218]/RAN binding protein 2, binds RAN-GTP at the cytoplasmic face of nuclear pores, also functions as a chaperone for red and green opsin molecules                                                                                                                                                                        |
| SW:HEPS_HUMAN P05981 homo sapiens (human). serine protease hepsin (ec 3.4.21.-) (transmembrane protease, serine 1). 11/1997 [MASS=45011]/Hepsin, a transmembrane serine protease implicated in cell growth control and initiation of blood coagulation; overexpressed in prostate and ovarian tumors                                                                                                                                                                                                 |
| no_description_avail/Serine protease inhibitor (Kunitz type 1), a Kunitz type serine protease inhibitor that may inhibit hepatocyte growth factor activator (HGFA), involved in the progression of hepatocellular carcinoma, downregulated in colorectal adenocarcinomas                                                                                                                                                                                                                             |
| GP:AK000512_1 Homo sapiens cDNA FLJ20505 fis, clone KAT09459; unnamed protein product. [MASS=37773]/Protein of unknown function                                                                                                                                                                                                                                                                                                                                                                      |
| SW:RL30_HUMAN P04645 homo sapiens (human), rattus norvegicus (rat), and mus musculus (mouse). 60s ribosomal protein l30. 2/1995 [MASS=12653]/Ribosomal protein L30, a putative component of the large 60S ribosomal subunit                                                                                                                                                                                                                                                                          |
| no_description_avail/Protein of unknown function                                                                                                                                                                                                                                                                                                                                                                                                                                                     |
| GP:S82470_1 BB1=malignant cell expression-enhanced gene/tumor progression-enhanced gene [human, UM-UC-9 bladder carcinoma cell line, mRNA, 1897 nt]; malignant cell expression-enhanced gene/tumor progression-enhanced gene; This sequence comes from Fig. 4A. [MASS=38164]/Member of the membrane bound O-acyl transferase (MBOAT) family, which are found in acyltransferase enzymes                                                                                                              |
| GP:AF055016_1 Homo sapiens clone 24774 unknown mRNA, partial cds. [MASS=23711]/Protein containing a SPRY (SP1a and Ryanodine Receptor) domain, has high similarity to uncharacterized C. elegans F18H3.1                                                                                                                                                                                                                                                                                             |
| GP:U52426_1 Homo sapiens GOK (STIM1) mRNA, complete cds. [MASS=77492]/Stromal interaction molecule 1, a protein involved in both positive and negative control of cell proliferation; loss of expression is associated with rhabdomyosarcoma and may be involved in Beckwith Wiedemann syndrome                                                                                                                                                                                                      |
| GP:AF177377_1 Homo sapiens cytoplasmic protein mRNA, complete cds; 120kDa; strongly overexpressed during mitosis. [MASS=108903]/Restrictedly overexpressed proliferation-associated protein, a cytoplasmic protein containing WD repeats and a serine protease motif, highly expressed only during mitosis                                                                                                                                                                                           |
| GP:AK022722_1 Homo sapiens cDNA FLJ12660 fis, clone NT2RM4002174, moderately similar to MRP PROTEIN; unnamed protein product. [MASS=31130]/Protein of unknown function, has high similarity to uncharacterized C. albicans Orf6.5982p                                                                                                                                                                                                                                                                |
| GP:AF157325_1 Homo sapiens sterol regulatory element binding protein 3 (SREBP3) mRNA, complete cds. [MASS=51277]/Epithelial protein lost in neoplasm, a component of actin cytoskeleton, exists as alternative splice forms alpha and beta, and contributes to cell growth regulation; downregulation of EPLIN alpha may promote cancer progression                                                                                                                                                  |
| GP:AL096857_1 Novel human mRNA from chromosome 1, which has similarities to BAT2 genes. [MASS=295830]                                                                                                                                                                                                                                                                                                                                                                                                |
| GP:AB018313_1 Homo sapiens mRNA for KIAA0770 protein, partial cds. [MASS=83943]/Vam6-Vps39-like, contains a citron homology (CNH) domain and a clathrin heavy chain repeat domain, forms homooligomers and may act as a tethering or docking factor that promotes lysosome clustering and fusion                                                                                                                                                                                                     |
| SWN:Z272_HUMAN Q14592 homo sapiens (human). zinc finger protein 272 (zinc finger protein hzf8) (fragment). 8/2001 [MASS=19678]/Zinc finger protein 272, a protein that contains tandem zinc fingers, may be involved in hemopoiesis                                                                                                                                                                                                                                                                  |
| GP:U16406_1 Human immunodeficiency virus type 1 patient I01, clone D, envelope glycoprotein (env) gene, V3 region, partial cds. [MASS=10815]                                                                                                                                                                                                                                                                                                                                                         |
| GP:D87453_1 Human mRNA for KIAA0264 gene, partial cds. [MASS=47798]/Protein of unknown function                                                                                                                                                                                                                                                                                                                                                                                                      |
| PIR2:T17219 hypothetical protein DKFZp566H1924.1 - human (fragment) [MASS=32002]/Stromal cell derived factor receptor 1, contains an immunoglobulin domain                                                                                                                                                                                                                                                                                                                                           |
| GP:AK025859_1 Homo sapiens cDNA: FLJ22206 fis, clone HRC01431; unnamed protein product. [MASS=49620]/Protein containing ten ankyrin (Ank) repeats, which may mediate protein-protein interactions, has moderate similarity to a region of ankyrin 3 (human ANK3, ankyrin G), which may link integral membrane proteins to the cytoskeleton                                                                                                                                                           |
| SW:L130_HUMAN P42704 homo sapiens (human). 130 kda leucine-rich protein (lrp 130) (gp130). 10/1996 [MASS=145201]/Leucine-rich PPR-motif containing, a leucine-rich protein associated with multiprotein complexes, binds mRNA and is likely involved in nuclear export of mRNA, may be involved in cytoskeletal organization                                                                                                                                                                         |
| GP:AK001207_1 Homo sapiens cDNA FLJ10345 fis, clone NT2RM2000984; unnamed protein product. [MASS=38193]                                                                                                                                                                                                                                                                                                                                                                                              |
| no_description_avail/Esp-15 homology domain-containing 4, may be involved in type VI collagen filament formation or stabilization, contains an N-terminal nucleotide-binding site, a bipartite nuclear localization signal, and a C-terminal EH protein-binding domain                                                                                                                                                                                                                               |
| SW:SMN1_HUMAN Q16637 homo sapiens (human). survival motor neuron protein 1. 5/2000 [MASS=31849]/Survival of motor neuron 2 centromeric, involved in neuromuscular function and may be required for neurogenesis; deletion of the corresponding gene is associated with spinal muscular atrophy (SMA) and adult progressive muscular atrophy                                                                                                                                                          |
| GP:U52111_2 Homo sapiens X28 region near ALD locus containing dual specificity phosphatase 9 (DUSP9), ribosomal protein L18a (RPL18a), Ca2+/Calmodulin-dependent protein kinase I (CAMKI), creatine transporter (CRTR), CDM protein (CDM), adrenoleukodystrophy protei [MASS=20867]/ribosomal protein L18a/Ribosomal protein L18a, a component of the 60S ribosomal subunit that is likely to play a role in protein synthesis; murine Rpl18a may play a role in squamous cell carcinoma progression |

|                                                                                                                                                                                                                                                                                                                                                                                                                                                                |
|----------------------------------------------------------------------------------------------------------------------------------------------------------------------------------------------------------------------------------------------------------------------------------------------------------------------------------------------------------------------------------------------------------------------------------------------------------------|
| <p>SW:PCP_HUMAN P42785 homo sapiens (human). lysosomal pro-x carboxypeptidase precursor (ec 3.4.16.2) (prolylcarboxypeptidase) (prcp) (proline carboxypeptidase) (angiotensinase c) (lysosomal carboxypeptidase) [MASS=55800]/Prolylcarboxypeptidase (angiotensinase C), a serine carboxypeptidase that catalyzes the cleavage of C-terminal amino acid residues linked to proline; corresponding gene may be a candidate locus for essential hypertension</p> |
| <p>SW:EP1_HUMAN Q15668 homo sapiens (human), pan troglodytes (chimpanzee), and macaca fascicularis (crab eating macaque) (cynomolgus monkey). epididymal secretory protein e1 precursor (epi-1) (he1) (epidid [MASS=16570]/Neimann-Pick disease type C2 (epididymal secretory protein 1), putative lysosomal protein that may play a role in cholesterol transport; mutations of the corresponding gene cause Niemann-Pick type C2 disease</p>                 |
| <p>PIR2:T46250 hypothetical protein DKFZp761A051.1 - human (fragment) [MASS=58084]</p>                                                                                                                                                                                                                                                                                                                                                                         |
| <p>SW:HE47_HUMAN Q13838 homo sapiens (human). probable atp-dependent rna helicase p47. 11/1997 [MASS=48991]/HLA-B associated transcript 1, a putative DEAD/H box ATP-dependent RNA helicase, involved in immune response and may negatively regulate inflammation by repressing cytokine production; corresponding gene lies within the major histocompatibility complex</p>                                                                                   |
| <p>GP:AF161494_1 Homo sapiens HSPC145 mRNA, complete cds. [MASS=33420]/mitochondrial ribosomal protein L15/Protein containing a ribosomal protein L15 family amino terminal domain, has a region of moderate similarity to a region of S. cerevisiae Mrpl10p, which is a mitochondrial ribosomal protein of the large subunit (YmL10)</p>                                                                                                                      |
| <p>GP:AL035413_5 Human DNA sequence from clone RP4-657E11 on chromosome 1p35.1-36.23 Contains 3' part of the CAPZB (capping protein (actin filament) muscle Z-line, beta) gene, genes for aldo-keto reductase family 7 (aflatoxin aldehyde reductase) members A2 (AKR7A2) a [MASS=95553]/ EST/Protein of unknown function</p>                                                                                                                                  |
| <p>EST/Protein of unknown function, has moderate similarity to uncharacterized C. elegans C01G10.8</p>                                                                                                                                                                                                                                                                                                                                                         |
| <p>PIR2:T42692 hypothetical protein DKFZp434D0428.1 - human (fragment) [MASS=51316]</p>                                                                                                                                                                                                                                                                                                                                                                        |
| <p>homo sapiens (human). protein c9orf10/EST/Protein of unknown function, has weak similarity to uncharacterized human KIAA1838</p>                                                                                                                                                                                                                                                                                                                            |
| <p>GP:AK024512_1 Homo sapiens cDNA: FLJ20859 fis, clone ADKA01617; unnamed protein product. [MASS=50734]/ probable ATPase/ EST/Protein of unknown function, has low similarity to uncharacterized C. elegans F32A7.4</p>                                                                                                                                                                                                                                       |
| <p>GP:AF157317_1 Homo sapiens AD-015 protein mRNA, complete cds; protein x 0008. [MASS=22864]/ similar to mouse minor histocompatibility antigen precursor/Protein of unknown function</p>                                                                                                                                                                                                                                                                     |
| <p>GP:AF161507_1 Homo sapiens HSPC158 mRNA, complete cds. [MASS=26192]/mitochondrial ribosomal protein L22/Mitochondrial ribosomal protein L22, a putative structural protein of the mitochondrial large 39S ribosomal subunit, may play a role in protein biosynthesis</p>                                                                                                                                                                                    |
| <p>SWN:ZH10_HUMAN Q14585 homo sapiens (human). zinc finger protein hzf10. 8/2001 [MASS=55383]/Zinc finger protein 345, a Kruppel-related zinc protein</p>                                                                                                                                                                                                                                                                                                      |
| <p>GP:AB039669_1 Homo sapiens mRNA for ALEX3, complete cds; similar to ALEX1 protein. [MASS=42501]/a novel human armadillo repeat containing protein/Arm proteins lost in epithelial cancers on chromosome X 3, a member of the ALEX protein family, contains a single armadillo-like (Arm) repeat and N-terminal hydrophobic residues that suggests it may be a membrane-associated protein</p>                                                               |
| <p>SW:DDX9_HUMAN Q08211 homo sapiens (human). atp-dependent rna helicase a (nuclear dna helicase ii) (ndh ii) (dead box protein 9). 12/1998 [MASS=140877]/DEAD box protein 9 (RNA helicase A), ATP-dependent RNA and DNA helicase, involved in HIV replication and transcription, and retroviral mRNA nuclear export; present as an autoantigen in patients with systemic lupus erythematosus</p>                                                              |
| <p>GP:AB043007_1 Homo sapiens SDF2L1 mRNA for SDF2 like protein 1, complete cds. [MASS=23511]/Stromal cell-derived factor 2-like 1, a member of the protein-O-mannosyltransferase-related abdomen (pmt-rt) family, contains three MIR (protein mannosyltransferase, IP3R and RyR) domains and a C-terminal ER retention signal</p>                                                                                                                             |
| <p>Similar to dipeptidyl peptidase 7/Dipeptidyl peptidase 7 (quiescent cell proline dipeptidase), a serine protease that cleaves N-terminal Xaa-Pro dipeptides, member of a family of post proline cleaving exopeptidases, may play a role in inhibition of apoptosis in quiescent lymphocytes</p>                                                                                                                                                             |
| <p>similar to neuronal protein 15.6/Protein of unknown function, has high similarity to uncharacterized mouse Np15.6</p>                                                                                                                                                                                                                                                                                                                                       |
| <p>SW:G732_HUMAN P16422 homo sapiens major gastrointestinal tumor-associated protein ga733-2 precursor (epithelial cell surface antigen) (epithelial glycoprotein) (egp) (adenocarcinoma-associated antigen) [MASS=34920]/Tumor-associated calcium signal transducer 1 (Epithelial cell adhesion molecule), a surface glycoprotein that mediates homotypic calcium-independent cell adhesion, acts in pancreas morphogenesis, present on most carcinomas</p>   |
| <p>estrogen-responsive finger protein/Zinc finger protein 147, an estrogen-responsive zinc-finger transcription factor required for estrogen induced cell proliferation and may mediate estrogen action</p>                                                                                                                                                                                                                                                    |
| <p>GP:AL035689_4 Human DNA sequence from clone RP1-187J11 on chromosome 6q11.1-22.33. Contains the gene for a novel protein similar to S. pombe and S. cerevisiae predicted proteins, the gene for a novel protein similar to protein kinase C inhibitors, the 3' end of th [MASS=20361]/Member of the histidine triad (HIT) family</p>                                                                                                                        |
| <p>GP:S69272_1 cytoplasmic antiproteinase=38 kda intracellular serine proteinase inhibitor [human, placenta, mRNA, 1465 nt]; 38 kda intracellular serine proteinase inhibitor; This sequence comes from Fig. 1; CAP. [MASS=42590]/Serine proteinase inhibitor clade B member 6 (placental thrombin inhibitor), member of the serine proteinase inhibitor (serpin) superfamily, may play roles in keratinocyte differentiation and platelet activat</p>         |
| <p>GP:AB046803_1 Homo sapiens mRNA for KIAA1583 protein, partial cds; Start codon is not identified.. [MASS=46775]/ EST</p>                                                                                                                                                                                                                                                                                                                                    |
| <p>mesenchymal stem cell protein DSCD75</p>                                                                                                                                                                                                                                                                                                                                                                                                                    |

|                                                                                                                                                                                                                                                                                                                                                                                                                                                                                                                                                                                                                                          |
|------------------------------------------------------------------------------------------------------------------------------------------------------------------------------------------------------------------------------------------------------------------------------------------------------------------------------------------------------------------------------------------------------------------------------------------------------------------------------------------------------------------------------------------------------------------------------------------------------------------------------------------|
| <p>SWN:U123_HUMAN Q9uh06 homo sapiens (human). hypothetical 12.4 kda protein bk223h9.2. 8/2001 [MASS=12405]/Member of the UPF0123 uncharacterized protein family, has very strong similarity to uncharacterized rat Loc192246</p>                                                                                                                                                                                                                                                                                                                                                                                                        |
| <p>GP:AK025822_1 Homo sapiens cDNA: FLJ22169 fis, clone HRC00632; unnamed protein product. [MASS=74624]/EST/Protein of unknown function, has low similarity to a region of <i>S. cerevisiae</i> Apg9p, which is required for starvation-induced autophagy</p>                                                                                                                                                                                                                                                                                                                                                                            |
| <p>GP:AJ245620_1 Homo sapiens CTL1 gene. [MASS=73349]/CDW92 antigen; mutations in the corresponding gene may result in familial dysautonomia</p>                                                                                                                                                                                                                                                                                                                                                                                                                                                                                         |
| <p>SWN:NDR2_HUMAN Q9un36 homo sapiens (human). ndrg2 protein (syld709613 protein). 8/2001 [MASS=39289]/N-myc downstream-regulated gene 2, a member of the Ndr family, which are involved in cell differentiation</p>                                                                                                                                                                                                                                                                                                                                                                                                                     |
| <p>GP:AK022590_1 Homo sapiens cDNA FLJ12528 fis, clone NT2RM4000155, moderately similar to THREONYL-TRNA SYNTHETASE, CYTOPLASMIC (EC 6.1.1.3); unnamed protein product. [MASS=66372]/Protein containing a tRNA synthetase class II core domain (G, H, P, S and T), a TGS (ThrRS, GTPase, and SpoT) domain, and an anticodon binding domain, has moderate similarity to threonyl-tRNA synthetase (human TARS)/Protein containing a tRNA synthetase class II core domain (G, H, P, S and T), a TGS (ThrRS, GTPase, and SpoT) domain, and an anticodon binding domain, has moderate similarity to threonyl-tRNA synthetase (human TARS)</p> |
| <p>GP:D26361_1 Human mRNA for KIAA0042 gene, complete cds. [MASS=186492]/EST/Protein containing two kinesin motor domains, which bind ATP and microtubules, and two forkhead associated (FHA) domains, which bind phosphopeptides, has a region of moderate similarity to a region of plus-end directed motor kinesin (<i>C. elegans</i> UNC-104)</p>                                                                                                                                                                                                                                                                                    |
| <p>SW:TISB_HUMAN Q07352 homo sapiens (human). tis11b protein (butyrate response factor 1) (egf-response factor 1) (erf-1). 7/1999 [MASS=36314]/TATA box binding protein-associated factor RNA polymerase III C 90, a subunit of RNA polymerase III transcription factor TFIIIB that is required for transcription of genes encoding tRNA, 5S rRNA, and small nuclear RNAs</p>                                                                                                                                                                                                                                                            |
| <p>GP:AF220049_1 Homo sapiens uncharacterized hematopoietic stem/progenitor cells protein MDS029 mRNA, complete cds. [MASS=12199]/Protein of unknown function, has high similarity to a region of <i>C. elegans</i> KLP-17, which is a C-terminal motor kinesin that is involved in chromosome movement during early embryonic and germ line development</p>                                                                                                                                                                                                                                                                             |
| <p>SW:MA32_HUMAN Q07021 homo sapiens (human). complement component 1, q subcomponent binding protein, mitochondrial precursor (glycoprotein gc1qbp) (gc1q-r protein) (hyaluronan-binding protein 1) (pre-mrna [MASS=31362]/Complement component 1 q subcomponent binding protein, binds the globular heads of complement subcomponent C1q, interacts with a wide array of proteins, involved in regulation of complement activation, may be associated with sperm motility</p>                                                                                                                                                           |
| <p>mitochondrial ribosomal protein S30; PAP protein; programmed cell death 9; bone marrow protein BM04/Mitochondrial ribosomal protein S30 (programmed cell death 9), a putative structural protein of the mitochondrial small 28S ribosomal subunit, may play a role in protein biosynthesis and apoptosis</p>                                                                                                                                                                                                                                                                                                                          |
| <p>GP:U96114_1 Homo sapiens Nedd-4-like ubiquitin-protein ligase WWP2 mRNA, complete cds; Nedd-4-like ubiquitin-protein ligase; WW domain-containing protein. [MASS=99070]/Atrophin 1 interacting protein 2, putative Nedd4-like ubiquitin ligase, may play a role in the ubiquitination and endocytosis of C1C 5 protein (CLCN5), may be involved in the ubiquitin-dependent degradation of LMP2A and Lyn</p>                                                                                                                                                                                                                           |
| <p>SW:Z142_HUMAN P52746 homo sapiens (human). zinc finger protein 142 (kiaa0236) (ha4654). 5/2000 [MASS=187866]/Zinc finger protein 142, a putative transcription factor, member of the Kruppel zinc-finger protein family</p>                                                                                                                                                                                                                                                                                                                                                                                                           |
| <p>SW:ES1_HUMAN P30042 homo sapiens (human). es1 protein homolog precursor (protein knp-i) (gt335). 5/2000 [MASS=28142]/Protein with similarity to zebrafish ES1 and <i>E. coli</i> SCR-P-27A, highly expressed in skeletal muscle and heart</p>                                                                                                                                                                                                                                                                                                                                                                                         |
| <p>GP:AF151817_1 Homo sapiens CGI-59 protein mRNA, complete cds. [MASS=45695]/weakly similar to SPLICING FACTOR, ARGININE/SERINE-RICH 4/Member of the DUF259 protein of unknown function family, has strong similarity to uncharacterized human LUC7L</p>                                                                                                                                                                                                                                                                                                                                                                                |
| <p>GP:AK001714_1 Homo sapiens cDNA FLJ10852 fis, clone NT2RP4001498, weakly similar to ANKYRIN REPEAT-CONTAINING PROTEIN AKR1; unnamed protein product. [MASS=54514]/Protein contains five ankyrin (Ank) repeats, which may mediate protein-protein interactions, and a DHHC-type zinc finger or NEW1 domain</p>                                                                                                                                                                                                                                                                                                                         |
| <p>SW:MIF_HUMAN P14174 homo sapiens (human). macrophage migration inhibitory factor (mif) (glycosylation-inhibiting factor) (gif). 5/2000 [MASS=12345]/Macrophage migration inhibitory factor, an immunoregulatory cytokine involved in monocyte migration and chemotaxis, T cell activation, delayed type hypersensitivity, and the response to lipopolysaccharide, counteracts glucocorticoid suppression</p>                                                                                                                                                                                                                          |
| <p>GP:AF042284_1 Homo sapiens unknown mRNA; similar to fission yeast sulfide dehydrogenase. [MASS=49961]/CGI-44 protein (sulfide dehydrogenase like yeast), a putative oxidoreductase homolog of <i>Schizosaccharomyces pombe</i> hmt2</p>                                                                                                                                                                                                                                                                                                                                                                                               |
| <p>SW:TFPI_HUMAN P10646 homo sapiens (human). tissue factor pathway inhibitor precursor (tfpi) (lipoprotein-associated coagulation inhibitor) (laci) (extrinsic pathway inhibitor) (epi). 12/1998 [MASS=35015]/Tissue factor pathway inhibitor, a Kunitz-type protease inhibitor that inhibits fibrin clot formation by directly inhibiting factor Xa and indirectly inhibiting the factor VIIa/tissue factor complex</p>                                                                                                                                                                                                                |
| <p>GP:AF151809_1 Homo sapiens CGI-51 protein mRNA, complete cds. [MASS=52160]/similar to GASTRIN/CHOLECYSTOKININ TYPE BRECEPTOR (CCK-B RECEPTOR) (CCK-BR) (<i>H. sapiens</i>)/Protein of unknown function, has low similarity to uncharacterized <i>C. elegans</i> GOP-3</p>                                                                                                                                                                                                                                                                                                                                                             |

|                                                                                                                                                                                                                                                                                                                                                                                                                                                                                                                                                       |
|-------------------------------------------------------------------------------------------------------------------------------------------------------------------------------------------------------------------------------------------------------------------------------------------------------------------------------------------------------------------------------------------------------------------------------------------------------------------------------------------------------------------------------------------------------|
| GP:AF085361_1 Homo sapiens HSPC032 mRNA, complete cds. [MASS=33331]/mitochondrial carrier homolog 2 /Member of the mitochondrial carrier protein family of membrane transporters, has strong similarity to uncharacterized mouse Mtch2                                                                                                                                                                                                                                                                                                                |
| GP:AJ001258_1 Homo sapiens mRNA for NIPSNAP1 protein. [MASS=33324]/NIPSNAP C. elegans homolog 1, a member of the NIPSNAP family of proteins, may have a vesicle transport-related function                                                                                                                                                                                                                                                                                                                                                            |
| GP:AC004528_1 Homo sapiens chromosome 19, cosmid R32184, complete sequence; Hypothetical human protein (partial CDS); CDS constructed from combination of BLASTX, EST matches and Xgrail predictions. N-terminus of protein likely encoded in flanking cosmid R29942. Pr [MASS=47306]/Protein containing four WD domains (WD-40 repeat), which may mediate protein-protein interactions, has a region of low similarity to a region of TATA box binding protein associated factor 2d 100 kD (human TAF5), which functions in transcription initiation |
| GP:AC004957_1 Homo sapiens PAC clone RP5-1093O17 from 7q11.23-q21, complete sequence; heterogeneous ribonuclear particle protein A1; similar to P49312 (PID:g1350822); H_DJ1093O17.1. [MASS=33911]                                                                                                                                                                                                                                                                                                                                                    |
| GP:AK024450_1 Homo sapiens mRNA for FLJ00042 protein, partial cds; For this clone, GeneMark analysis triggered an alert for spurious CDS split. The result of GeneMark analysis of the nucleotide sequence of this clone i. [MASS=48320]/Protein of unknown function, has a region of low similarity to aplysia Ras-related homolog B (human ARHB), which functions in actin cytoskeleton assembly and is the pharmacological target of certain anti-cancer drugs that inhibit cell growth                                                            |
| SW:PSS8_HUMAN Q16651 homo sapiens (human). prostatic precursor (ec 3.4.21.-). 7/1998 [MASS=36431]/Protease serine 8 (prostatic), a serine protease that plays a role in regulation of the amiloride-sensitive epithelial sodium channel, may act as a suppressor of invasive prostate and breast cancer, overexpressed in ovarian cancer cells                                                                                                                                                                                                        |
| SW:SBP1_HUMAN Q13228 homo sapiens (human). selenium-binding protein 1. 5/2000 [MASS=52313]/Selenium binding protein 1, may have a role in negative regulation of cell growth; mouse Selenbp1 may play a role in mediating the anticarcinogenic effects of selenium                                                                                                                                                                                                                                                                                    |
| PIR2:T08789 hypothetical protein DKFZp586C1622.1 - human (fragment) [MASS=16138]/Homo sapiens testis-specific chromodomain Y-like protein (CDYL) mRNA/Chromodomain protein Y chromosome-like, a ubiquitously-expressed autosomal protein with similarity to chromodomain-containing proteins located on the Y chromosome                                                                                                                                                                                                                              |
| GP:AK022587_1 Homo sapiens cDNA FLJ12525 fis, clone NT2RM4000030, weakly similar to LAS1 PROTEIN; unnamed protein product. [MASS=83065]/Protein of unknown function, has a region of low similarity to a region of S. cerevisiae Las1p, which is involved in cell morphogenesis, cytoskeletal regulation, and bud formation                                                                                                                                                                                                                           |
| immunoglobulin light chain variable region (human)                                                                                                                                                                                                                                                                                                                                                                                                                                                                                                    |
| PIR2:S12444 hypothetical protein 458 - human [MASS=49127]/human immunoglobulin lambda genes                                                                                                                                                                                                                                                                                                                                                                                                                                                           |

Panel 5, pgs. 239-242

| Cellular Process                         | Gene   | Functional Group | XPRESS Count | d0:d8 ratio | d0:d8 StdDev | Description                                                                                                                                                                                                                                                                                                                                                                                                                                                                           |
|------------------------------------------|--------|------------------|--------------|-------------|--------------|---------------------------------------------------------------------------------------------------------------------------------------------------------------------------------------------------------------------------------------------------------------------------------------------------------------------------------------------------------------------------------------------------------------------------------------------------------------------------------------|
| <b>Lipid, Fat, and Sterol Metabolism</b> |        |                  |              |             |              |                                                                                                                                                                                                                                                                                                                                                                                                                                                                                       |
| SW:FDFT_HUMAN                            | FDFT1  | 19               | 1            | 0.22        | 0.00         | SW:FDFT_HUMAN P37268 homo sapiens (human). farnesyl-diphosphate farnesyltransferase (ec 2.5.1.21) (squalene synthetase) (sq) (ss) (fpp.fpp farnesyltransferase). 10/1996 [MASS=48115]/Squalene synthase (farnesyl-diphosphate farnesyltransferase 1), catalyzes the conversion of farnesyl diphosphate to squalene in cholesterol biosynthesis, may be a potential target for cholesterol lowering therapy                                                                            |
| GPN:Y14436_1                             | PPAP2A | 19               | 2            | 0.27        | 0.02         | type-2 phosphatidic acid phosphatase alpha-1 /Phosphatidic acid phosphatase type 2a, catalyzes the dephosphorylation of various lipid phosphates, regulates the level of lipid phosphates which are involved in signal transduction                                                                                                                                                                                                                                                   |
| GP:D89053_1                              | FACL3  | 19               | 13           | 0.29        | 0.13         | fatty-acid-Coenzyme A ligase, long-chain 3 /Fatty acid Coenzyme A ligase long chain 3, a putative long-chain fatty-acyl-CoA synthetase that may function in lipid synthesis and fatty acid degradation                                                                                                                                                                                                                                                                                |
| SW:ACDV_HUMAN                            | ACADVL | 19               | 1            | 0.32        | 0.00         | SW:ACDV_HUMAN P49748 homo sapiens (human). acyl-coa dehydrogenase, very-long-chain specific, mitochondrial precursor (ec 1.3.99.-) (vicad). 5/2000 [MASS=70390]/Very long chain acyl-coenzyme A dehydrogenase, oxidizes straight chain acyl-CoAs in the initial step of fatty acid beta-oxidation, severe deficiency results in infant cardiomyopathy with high mortality, mild deficiency results in hypoketotic hypoglycemia                                                        |
| SW:FAS_HUMAN                             | FASN   | 19               | 90           | 0.34        | 0.15         | SW:FAS_HUMAN P49327 homo sapiens (human). fatty acid synthase (ec 2.3.1.85) [includes: ec 2.3.1.38; ec 2.3.1.39; ec 2.3.1.41; ec 1.1.1.100; ec 4.2.1.61; ec 1.3.1.10; ec 3.1.2.14]. 7/1999 [MASS=273102]/Fatty acid synthase, multifunctional enzyme that synthesizes fatty acids from dietary proteins and carbohydrates; increased expression is associated with tumor growth and development. expression may serve as a prognostic maker for breast cancer                         |
| SW:ERG7_HUMAN                            | LSS    | 19               | 1            | 0.37        | 0.00         | SW:ERG7_HUMAN P48449 homo sapiens (human). lanosterol synthase (ec 5.4.99.7) (oxidosqualene--lanosterol cyclase) (2,3-epoxysqualene--lanosterol cyclase) (osc). 5/2000 [MASS=83309]/Lanosterol synthase, catalyzes the cyclization of (S)-2,3-oxidosqualene forming lanosterol in sterol biosynthesis                                                                                                                                                                                 |
| SW:COA1_HUMAN                            | ACACA  | 19               | 2            | 0.41        | 0.05         | SW:COA1_HUMAN Q13085 homo sapiens (human). acetyl-coa carboxylase 1 (ec 6.4.1.2) (acc-alpha) [includes: biotin carboxylase (ec 6.3.4.14)]. 7/1999 [MASS=265040]/Acetyl-Coenzyme A carboxylase alpha, catalyzes the rate-limiting step in long-chain fatty acid biogenesis; deficiency leads to defects in fatty acid synthesis                                                                                                                                                        |
| SW:ACLY_HUMAN                            | ACLY   | 19               | 6            | 0.44        | 0.09         | SW:ACLY_HUMAN P53396 homo sapiens (human). atp-citrate (pro-s-)-lyase (ec 4.1.3.8) (citrate cleavage enzyme). 10/1996 [MASS=121420]/ATP citrate lyase, catalyzes the formation of acetyl-CoA and oxaloacetate from citrate and CoA with the concomitant hydrolysis of ATP to ADP and phosphate, involved in cholesterol and fatty acid synthesis, nutritionally regulated                                                                                                             |
| SW:LDLR_HUMAN                            | LDLR   | 19               | 3            | 0.55        | 0.04         | SW:LDLR_HUMAN P01130 homo sapiens (human). low-density lipoprotein receptor precursor (ldl receptor). 5/2000 [MASS=95376]/Low density lipoprotein receptor, mediates uptake of low density lipoproteins, involved in lipid metabolism; gene variations are associated with familial hypercholesterolemia, hypertension, atherosclerosis, and coronary artery disease                                                                                                                  |
| SW:NSDL_HUMAN                            | NSDHL  | 19               | 6            | 0.58        | 0.16         | SW:NSDL_HUMAN Q15738 homo sapiens (human). nad(p)-dependent steroid dehydrogenase-like protein (h105e3 protein). 5/2000 [MASS=41900]/NAD(P)H steroid dehydrogenase-like protein, a 3 beta-hydroxysteroid dehydrogenase that functions in cholesterol biosynthesis; mutations in the corresponding gene cause CHILD syndrome                                                                                                                                                           |
| SW:CP51_HUMAN                            | CYP51  | 19               | 3            | 0.71        | 0.04         | SW:CP51_HUMAN Q16850 homo sapiens (human). cytochrome p450 51 (ec 1.14.14.1) (cyp1) (p4501) (sterol 14-alpha demethylase) (lanosterol 14-alpha demethylase) (ldm) (p450-14dm). 5/2000 [MASS=56806]/Lanosterol 14-alpha-demethylase (sterol 14alpha-demethylase); cytochrome P450 enzyme involved in sterol biosynthesis                                                                                                                                                               |
| SW:LCFA_HUMAN                            | FACL1  | 19               | 14           | 0.81        | 0.13         | SW:LCFA_HUMAN P41215 homo sapiens (human). long-chain-fatty-acid--coa ligase 1 (ec 6.2.1.3) (long-chain acyl-coa synthetase 1) (lacs 1) (palmitoyl-coa ligase). 10/1996 [MASS=78348]/Long chain fatty acid-Coenzyme A ligase (palmitoyl-CoA ligase), a member of the long chain acyl-CoA synthetase family required for lipid synthesis and fatty acid degradation                                                                                                                    |
| SW:LCB2_HUMAN                            | SPTLC2 | 19               | 1            | 0.82        | 0.00         | SW:LCB2_HUMAN O15270 homo sapiens (human). serine palmitoyltransferase 2 (ec 2.3.1.50) (long chain base biosynthesis protein 2) (lcb 2) (serine-palmitoyl-coa transferase 2) (spt 2) (kiaa0526). 5/2000 [MASS=62924]/Serine palmitoyltransferase long chain base subunit 2, member of the aminolevulinatase synthase superfamily, catalyzes the first step in ceramide formation, involved in epidermal cell response to UV exposure and in leukemia cell ectopside-induced apoptosis |
| SW:DRS1_HUMAN                            | PECI   | 19               | 9            | 0.83        | 0.22         | SW:DRS1_HUMAN O75521 homo sapiens (human). dbi-related protein 1 (drs-1). 5/2000 [MASS=40151]/Peroxisomal D3,D2 enoyl-CoA isomerase, catalyzes the isomerization of 3-cis-octenoyl-CoA to 2-trans-octenoyl-CoAm, a step in the beta oxidation of fatty acids in peroxisomes                                                                                                                                                                                                           |
| SWN:P23_HUMAN                            | p23    | 19               | 2            | 0.85        | 0.01         | SWN:P23_HUMAN Q15185 homo sapiens (human). telomerase-binding protein p23 (hsp90 co-chaperone) (progesterone receptor complex p23). 8/2001 [MASS=18697]/Inactive progesterone receptor (23kD), cochaperone with prostaglandin E synthase activity that is a component of the unstimulated progesterone receptor complex and that enhances receptor complex formation through interactions with Hsp90 (HSPCA)                                                                          |
| SW:KIME_HUMAN                            | MVK    | 19               | 1            | 0.91        | 0.00         | SW:KIME_HUMAN Q03426 homo sapiens (human). mevalonate kinase (ec 2.7.1.36) (mk). 7/1999 [MASS=42451]/Mevalonate kinase (mevalonic aciduria), a peroxisomal enzyme involved in isoprenoid and cholesterol biosynthesis; mutations in the corresponding gene cause mevalonic aciduria, hyperimmunoglobulinemia D and periodic fever syndrome                                                                                                                                            |
| GP:U66669_1                              | HIBCH  | 19               | 1            | 0.91        | 0.00         | GP:U66669_1 Homo sapiens 3-hydroxyisobutyryl-coenzyme A hydrolase mRNA, complete cds. [MASS=42908]/Beta-hydroxyisobutyryl-coenzyme A hydrolase, enzyme that hydrolyzes 3-hydroxyisobutyryl CoA, an intermediate of valine catabolism                                                                                                                                                                                                                                                  |

|               |         |    |    |      |      |                                                                                                                                                                                                                                                                                                                                                                                                                                                                             |
|---------------|---------|----|----|------|------|-----------------------------------------------------------------------------------------------------------------------------------------------------------------------------------------------------------------------------------------------------------------------------------------------------------------------------------------------------------------------------------------------------------------------------------------------------------------------------|
| SW:ASAH_HUMAN | ASAH    | 19 | 1  | 0.99 | 0.00 | SW:ASAH_HUMAN Q13510 homo sapiens (human). acid ceramidase precursor (ec 3.5.1.23) (acylsphingosine deacylase) (n-acylsphingosine amidohydrolase) (ac) (putative 32 kda heart protein) (php32). 5/2000 [MASS=44650]/N-acylsphingosine amidohydrolase (acid ceramidase), catalyzes hydrolysis of ceramide to sphingosine and free fatty acid, inhibits apoptosis, upregulated in prostate cancer, deficiency is associated with Farber disease                               |
| GP:AF126782_1 | RETSDR1 | 19 | 8  | 1.06 | 0.21 | GP:AF126782_1 Homo sapiens retinal short-chain dehydrogenase/reductase retSDR4 mRNA, complete cds. [MASS=32268]/Short-chain dehydrogenase-reductase 1, catalyzes the NADPH-dependent reduction of all-trans-retinol to retinol, may play a role in visual system phototransduction; the corresponding gene is deleted in many neuroblastoma cell lines with MYCN amplification                                                                                              |
| SW:OXYB_HUMAN | OSBP    | 19 | 3  | 1.08 | 0.26 | SW:OXYB_HUMAN P22059 homo sapiens (human). oxysterol-binding protein. 11/1995 [MASS=89421]/Oxysterol binding protein, member of a family of intracellular lipid receptors, contains a pleckstrin domain and an oxysterol binding domain, binds oxysterols, may play a role in the regulation of cholesterol metabolism and oxysterol-induced cell death                                                                                                                     |
| SW:CPT2_HUMAN | CPT2    | 19 | 1  | 1.08 | 0.00 | SW:CPT2_HUMAN P23786 homo sapiens (human). carnitine o-palmitoyltransferase ii, mitochondrial precursor (ec 2.3.1.21) (cpt ii). 5/2000 [MASS=73777]/Carnitine palmitoyltransferase II, a mitochondrial long-chain fatty acid oxidation enzyme; mutations are associated with a lipid metabolism disorder that includes recurrent myopathy with progressive rhabdomyolysis, muscle weakness and myoglobinuria                                                                |
| SW:FAAH_HUMAN | FAAH    | 19 | 3  | 1.10 | 0.22 | SW:FAAH_HUMAN O00519 homo sapiens (human). fatty-acid amide hydrolase (ec 3.1.-.-) (oleamide hydrolase). 5/2000 [MASS=63038]/Fatty acid amide hydrolase, degrades neuromodulatory fatty acid amides, including anandamide, predicted to have a role in a wide variety of physiologic effects such as voluntary movement, pain, sleep, and fertility, may have a role in Parkinson disease                                                                                   |
| SW:HBP_HUMAN  | HDLBP   | 19 | 3  | 1.11 | 0.27 | SW:HBP_HUMAN Q00341 homo sapiens (human). high density lipoprotein binding protein (hdl-binding protein). 12/1998 [MASS=141440]/High density lipoprotein binding protein, binds and inhibits cleavage of the 3' UTR of vitellogenin mRNA, binds and promotes nuclear export of tRNA, binds high density lipoproteins and may have roles in cholesterol metabolism and atherogenesis                                                                                         |
| SW:NPC1_HUMAN | NPC1    | 19 | 1  | 1.16 | 0.00 | SW:NPC1_HUMAN O15118 homo sapiens (human). niemann-pick c1 protein precursor. 5/2000 [MASS=142149]/Niemann-Pick disease type C1, a lysosomal sterol transporter involved in cholesterol metabolism; mutation of the corresponding gene causes Niemann-Pick type C1 disease and mutation of mouse Npc1 causes a disease like Niemann-Pick type C1 disease                                                                                                                    |
| SW:PEBP_HUMAN | PBP     | 19 | 2  | 1.17 | 0.15 | SW:PEBP_HUMAN P30086 homo sapiens (human). phosphatidylethanolamine-binding protein (pebp) (neuropolypeptide h3). 7/1999 [MASS=20926]/Phosphatidylethanolamine-binding protein, binds GTP, may regulate cAMP accumulation, enhance acetylcholine synthesis, and play a role in organizing phospholipids in the myelin sheath                                                                                                                                                |
| SW:GLCM_HUMAN | GBA     | 19 | 2  | 1.21 | 0.09 | SW:GLCM_HUMAN P04062 homo sapiens (human). glucosylceramidase precursor (ec 3.2.1.45) (beta-glucocerebrosidase) (acid beta-glucosidase) (d-glucosyl-n-acylsphingosine glucohydrolase) (alglucerase) (imigl) [MASS=59697]/Acid beta glucosidase (beta-glucocerebrosidase), a lysosomal membrane protein that hydrolyzes glucosylceramide and glucosylsphingosine, may play a role in epidermal differentiation; mutations in the corresponding gene cause Gaucher's disease  |
| SW:PI52_HUMAN | PIP5K2A | 19 | 1  | 1.24 | 0.00 | SW:PI52_HUMAN P48426 homo sapiens (human). phosphatidylinositol-4-phosphate 5-kinase type ii alpha (ec 2.7.1.68) (pip5kii-alpha) (1-phosphatidylinositol-4-phosphate kinase) (ptdins(4)p-5-kinase b isoform [MASS=46193]/Phosphatidylinositol-4-phosphate 5-kinase type II, alpha, a member of a family of kinases responsible for the synthesis of PtdIns(4,5)P2                                                                                                           |
| GP:AF034544_1 | DHCR7   | 19 | 6  | 1.25 | 0.30 | GP:AF034544_1 Homo sapiens delta7-sterol reductase mRNA, complete cds; D7SR. [MASS=54516]/7-dehydrocholesterol reductase, catalyzes the reduction of the C7-C8 (delta 7) double bond of 7-dehydrocholesterol in the last step of cholesterol biosynthesis; mutations in the corresponding gene are associated with Smith-Lemli-Opitz                                                                                                                                        |
| SW:THIK_HUMAN | ACAA1   | 19 | 15 | 1.26 | 0.25 | SW:THIK_HUMAN P09110 homo sapiens (human). 3-ketoacyl-coa thiolase, peroxisomal precursor (ec 2.3.1.16) (beta-ketothiolase) (acetyl-coa acyltransferase) (peroxisomal 3-oxoacyl-coa thiolase). 7/1999 [MASS=44292]/Peroxisomal 3-oxoacyl-coenzyme A thiolase (peroxisomal 3-ketoacyl-Coenzyme A thiolase), functions in peroxisomal beta-oxidation of fatty acids, deficiency is associated with rhizomelic chondrodysplasia punctata (RCDP)                                |
| SW:CPT1_HUMAN | CPT1A   | 19 | 1  | 1.30 | 0.00 | SW:CPT1_HUMAN P50416 homo sapiens (human). carnitine o-palmitoyltransferase i, mitochondrial liver isoform (ec 2.3.1.21) (cpt i) (cpt-l). 7/1999 [MASS=88429]/Liver carnitine palmitoyltransferase I, enzyme of long-chain fatty acid beta-oxidation pathway; mutations in the corresponding gene are associated with carnitine palmitoyltransferase I deficiency                                                                                                           |
| SW:D3D2_HUMAN | DCI     | 19 | 3  | 1.31 | 0.20 | SW:D3D2_HUMAN P42126 homo sapiens (human). 3,2-trans-enoyl-coa isomerase, mitochondrial precursor (ec 5.3.3.8) (dodecenoyl-coa delta-isomerase). 7/1999 [MASS=32816]/Dodecenoyl-Coenzyme A delta isomerase (3,2 trans-enoyl-Coenzyme A isomerase), catalyzes the isomerization of 3-cis and 3-trans enoyl CoA esters to 2-trans enoyl CoA esters, functions in mitochondrial beta-oxidation of unsaturated fatty acids                                                      |
| SW:SAP_HUMAN  | PSAP    | 19 | 14 | 1.31 | 0.91 | SW:SAP_HUMAN P07602 h proactivator polypeptide precursor [contains: saposin a (protein a); saposin b (sphingolipid activator protein 1) (sap-1) (dispersin) (sulfatide/gm1 activator); saposin c (co-beta- [MASS=58113]/Prosaposin, precursor of saposins A, B, C, and D which transport gangliosides and activate sphingolipid hydrolysis, stimulates neurite growth and inhibits apoptosis; variants are associated with metachromatic leukodystrophy and Gaucher disease |
| GP:AB037108_1 | TPRA40  | 19 | 2  | 1.36 | 0.09 | GP:AB037108_1 Homo sapiens mRNA for seven transmembrane domain orphan receptor, complete cds; seven transmembrane domain containing protein. [MASS=41090]/Protein with strong similarity to murine Tpra40, which is a seven transmembrane domain protein expressed in 3T3 adipocytes, and that has elevated expression in epididymal fat of genetically diabetic and obese mice                                                                                             |



|                |               |    |    |      |      |                                                                                                                                                                                                                                                                                                                                                                                                                                                                                  |
|----------------|---------------|----|----|------|------|----------------------------------------------------------------------------------------------------------------------------------------------------------------------------------------------------------------------------------------------------------------------------------------------------------------------------------------------------------------------------------------------------------------------------------------------------------------------------------|
| SW:ECH1_HUMAN  | ECH1          | 19 | 28 | 1.36 | 0.24 | SW:ECH1_HUMAN Q13011 homo sapiens (human). delta3,5-delta2,4-dienoyl-coa isomerase precursor (ec 5.3.3.-). 7/1999 [MASS=35994]/Enoyl Coenzyme A hydratase 1 (peroxisomal), putative enzyme that may play a role in peroxisomal beta-oxidation                                                                                                                                                                                                                                    |
| SW:SAP3_HUMAN  | GM2A          | 19 | 3  | 1.39 | 0.14 | SW:SAP3_HUMAN P17900 homo sapiens (human). ganglioside gm2 activator precursor (cerebroside sulfate activator protein) (shingolipid activator protein 3) (sap-3). 7/1999 [MASS=20822]/GM2 ganglioside activator protein, binds glycolipids and is a cofactor for GM2 ganglioside hydrolysis by beta hexosaminidase A, activates phospholipase D, and inhibits platelet activating factor; mutation of the gene causes GM2-gangliosidosis variant AB                              |
| GP:AF035959_1  | PPAP2C        | 19 | 1  | 1.42 | 0.00 | GP:AF035959_1 Homo sapiens type-2 phosphatidic acid phosphatase-gamma (PAP2-g) mRNA, complete cds; phosphatidate phosphohydrolase; phospholipid phosphatase. [MASS=32574]/Phosphatidic acid phosphatase 2c, hydrolyzes phospholipids, may play a role in signal transduction                                                                                                                                                                                                     |
| SW:OCRL_HUMAN  | OCRL          | 19 | 2  | 1.42 | 1.00 | SW:OCRL_HUMAN Q01968 homo sapiens (human). lowe's oculocerebrorenal syndrome protein. 7/1998 [MASS=111485]/Oculocerebrorenal syndrome of Lowe, phosphatidylinositol-4,5-bisphosphate 5-phosphatase, may play a role in intracellular protein trafficking; mutation of the corresponding gene causes Lowe oculocerebrorenal syndrome                                                                                                                                              |
| GP:AB033078_1  | SGPL1         | 19 | 2  | 1.44 | 0.06 | GP:AB033078_1 Homo sapiens mRNA for KIAA1252 protein, partial cds; Start codon is not identified. [MASS=64962]/Protein with strong similarity to sphingosine phosphate lyase 1 (mouse Sgpl1), which is a member of the carbon-carbon lyase subclass of aldehyde-lyases that catalyzes cleavage of sphingosine phosphate and is involved in proliferative signal transduction                                                                                                     |
| SWN:CNE3_HUMAN | CPN3          | 19 | 28 | 1.47 | 0.27 | SWN:CNE3_HUMAN O75131 homo sapiens (human). copine iii. 8/2001 [MASS=60131]/Copine III, a member of the copine family of phospholipid binding proteins, contains C2 and integrin A domains, may play a role in membrane trafficking, displays protein kinase activity, however, it does not contain a traditional kinase catalytic domain                                                                                                                                        |
| SW:NLTP_HUMAN  | SCP2          | 19 | 2  | 1.50 | 0.06 | SW:NLTP_HUMAN P22307 homo sapiens (human). nonspecific lipid-transfer protein precursor (nsl-tp) (sterol carrier protein 2) (scp-2) (sterol carrier protein x) (scp-x) (scpx). 5/2000 [MASS=58994]/Sterol carrier protein 2, catalyzes the exchange of phospholipids between membranes, stimulates cholesterol metabolism and may regulate steroidogenesis; alternative form, SCPX, is a 3 oxoacyl CoA thiolase                                                                  |
| SW:CAOP_HUMAN  | ACOX1 or ACOX | 19 | 1  | 1.53 | 0.00 | SW:CAOP_HUMAN Q15067 homo sapiens (human). acyl-coenzyme a oxidase, peroxisomal (ec 1.3.3.6) (palmitoyl-coa oxidase) (aox). 11/1997 [MASS=74502]/Peroxisomal acyl-coenzyme A oxidase, catalyzes the first step in very long chain fatty acid beta-oxidation, desaturates acyl-CoA to 2-trans-enoyl-CoA and produces hydrogen peroxide                                                                                                                                            |
| SW:PKBS_HUMAN  | BZRP          | 19 | 2  | 1.57 | 0.04 | SW:PKBS_HUMAN P30536 homo sapiens (human). peripheral-type benzodiazepine receptor (pbr) (pkbs) (mitochondrial benzodiazepine receptor). 6/1994 [MASS=18779]/Benzodiazepine receptor (peripheral), involved in steroid biosynthesis, cell proliferation, and may contribute to mitochondrial biogenesis and inhibit oxygen radical induced apoptosis; expression, nuclear location may correlate to breast tumor progression                                                     |
| SW:PXF_HUMAN   | PXF           | 19 | 1  | 1.61 | 0.00 | SW:PXF_HUMAN P40855 homo sapiens (human). peroxisomal farnesylated protein (33 kda housekeeping protein). 12/1998 [MASS=32807]/Peroxisomal farnesylated protein, peroxisomal protein that binds several peroxisomal membrane proteins (PMP), involved in early stages of PMP import and peroxisomal biogenesis; deficiency is associated with Zellweger syndrome complementation group J                                                                                         |
| SW:DHA4_HUMAN  | ALDH3A2       | 19 | 2  | 1.62 | 0.67 | SW:DHA4_HUMAN P51648 homo sapiens (human). fatty aldehyde dehydrogenase (ec 1.2.1.3) (aldehyde dehydrogenase, microsomal) (aldh class 3). 7/1999 [MASS=54848]/Aldehyde dehydrogenase 3 family member A2, catalyzes the oxidation of long chain fatty aldehydes and leukotrienes; mutation of the corresponding gene causes Sjogren Larsson syndrome, a disorder marked by mental retardation, spasticity, and ichthyosis                                                         |
| SW:HCD2_HUMAN  | HADH2         | 19 | 4  | 1.67 | 0.12 | SW:HCD2_HUMAN Q99714 homo sapiens (human). 3-hydroxyacyl-coa dehydrogenase type ii (ec 1.1.1.35) (endoplasmic reticulum-associated amyloid beta-peptide binding protein) (short- chain type dehydrogenase/ [MASS=26923]/Hydroxyacyl-Coenzyme A dehydrogenase (type II), catalyzes the oxidation of steroids and alcohols, binds amyloid-beta protein; overexpressed and mediates neurotoxicity of Alzheimer's disease, mutation in the corresponding gene causes hyperinsulinism |
| SW:DHB4_HUMAN  | HSD17B4       | 19 | 12 | 1.74 | 0.52 | SW:DHB4_HUMAN P51659 homo sapiens (human). estradiol 17 beta-dehydrogenase 4 (ec 1.1.1.62) (17-beta-hsd 4) (17-beta-hydroxysteroid dehydrogenase 4). 11/1997 [MASS=79686]/Type IV 17 beta-hydroxysteroid dehydrogenase, a peroxisomal multifunctional enzyme with estradiol 17 beta-dehydrogenase and D-3 hydroxyacyl CoA dehydratase activities, involved in steroid and bile acid metabolism                                                                                   |
| SW:AGAL_HUMAN  | GLA           | 19 | 1  | 1.80 | 0.00 | SW:BDH_HUMAN P06280 homo sapiens (human). alpha-galactosidase a precursor (ec 3.2.1.22) (melibiase) (alpha-d-galactoside galactohydrolase) (alpha-d-galactosidase a). 7/1998 [MASS=48767]/Alpha-galactosidase A (alpha-D-galactoside galactohydrolase), hydrolyzes glycosphingolipids to release alpha-D-galactosyl residues; mutation of the corresponding gene causes Fabry disease                                                                                            |
| SW:ADRO_HUMAN  | FDXR          | 19 | 1  | 1.82 | 0.00 | SW:ADRO_HUMAN P22570 homo sapiens (human). nadph:adrenodoxin oxidoreductase precursor (ec 1.18.1.2) (adrenodoxin reductase) (ferredoxin-nadp(+) reductase). 7/1999 [MASS=53809]/Ferredoxin reductase, mitochondrial flavoprotein that mediates electron transport from NADPH to cytochrome P450sc                                                                                                                                                                                |
| SW:ECHB_HUMAN  | HADHB         | 19 | 4  | 1.87 | 0.07 | SW:ECHB_HUMAN P55084 homo sapiens (human). trifunctional enzyme beta subunit, mitochondrial precursor (tp-beta) [includes: 3-ketoacyl-coa thiolase (ec 2.3.1.16) (acetyl-coa acyltransferase) (beta-ketothio [MASS=51294]/3-hydroxyacyl-CoA dehydrogenase, 3-ketoacyl-CoA thiolase trifunctional protein beta subunit, involved in fatty acid beta-oxidation; variants are associated with trifunctional protein deficiency, sudden infant death syndrome and liver failure      |

|               |         |    |    |      |      |                                                                                                                                                                                                                                                                                                                                                                                                                                                                                                                                                                       |
|---------------|---------|----|----|------|------|-----------------------------------------------------------------------------------------------------------------------------------------------------------------------------------------------------------------------------------------------------------------------------------------------------------------------------------------------------------------------------------------------------------------------------------------------------------------------------------------------------------------------------------------------------------------------|
| SW:CNBP_HUMAN | ZNF9    | 19 | 2  | 1.87 | 0.27 | SW:CNBP_HUMAN P20694 homo sapiens (human), and rattus norvegicus (rat). cellular nucleic acid binding protein (cnbp). 11/1997 [MASS=19463]/Zinc-finger protein that binds to sterol regulatory element (SRE) and may function in sterol-mediated repression of genes encoding the low density lipoprotein receptor and enzymes of the cholesterol biosynthetic pathway                                                                                                                                                                                                |
| SW:MAOM_HUMAN | ME2     | 19 | 2  | 1.96 | 0.04 | SW:MAOM_HUMAN P23368 homo sapiens (human). NAD-dependent malic enzyme, mitochondrial precursor (ec 1.1.1.38) (nad-me). 5/2000 [MASS=65444]/Malic enzyme 2, a NAD(+)-dependent mitochondrial form of malic enzyme, catalyzes the oxidative decarboxylation of malate to form pyruvate                                                                                                                                                                                                                                                                                  |
| SW:ECHA_HUMAN | HADHA   | 19 | 13 | 1.97 | 0.65 | SW:ECHA_HUMAN P40939 homo sapiens (human). mitochondrial trifunctional enzyme alpha subunit precursor (tp-alpha) [includes: long-chain enoyl-coa hydratase (ec 4.2.1.17); long chain 3-hydroxyacyl-coa deh [MASS=82960]/Mitochondrial long-chain enoyl-CoA hydratase/3-hydroxyacyl-CoA dehydrogenase/3-ketoacyl-CoA thiolase alpha subunit, involved in fatty acid beta-oxidation, mutations are associated with trifunctional protein deficiency and Reye-like syndrome                                                                                              |
| SW:ETFB_HUMAN | ETFB    | 19 | 2  | 1.99 | 0.48 | SW:ETFB_HUMAN P38117 homo sapiens (human). electron transfer flavoprotein beta-subunit (beta-ef). 5/2000 [MASS=27844]/Electron transfer flavoprotein beta subunit, shuttles electrons between primary flavoprotein dehydrogenases involved in mitochondrial fatty acid metabolism and ubiquinone oxidoreductase; genetic variants are associated with type II glutaric acidemia                                                                                                                                                                                       |
| GP:AL023805_1 | PLCB4   | 19 | 6  | 2.00 | 0.24 | GP:AL023805_1 Human DNA sequence from clone RP4-811H13 on chromosome 20p12. Contains part of the PLCB4 gene for Phospholipase C beta 4, STSs, GSSs and a CpG island, complete sequence; combines with dJ1119D9.2.1 and .2 in Em:AL031652 to form isoforms 5 and 6; may a [MASS=61433]/1-phosphatidylinositol-4,5-bisphosphate phosphodiesterase beta 4/Phospholipase C beta 4, member of a G protein-regulated family of phospholipases that hydrolyze phosphatidylinositol 4,5-bisphosphate to the second messengers inositol 1,4,5-trisphosphate and diacylglycerol |
| SW:GST3_HUMAN | MGST3   | 19 | 2  | 2.31 | 0.83 | SW:GST3_HUMAN O14880 homo sapiens (human). microsomal glutathione s-transferase 3 (ec 2.5.1.18) (microsomal gst-3) (microsomal gst-iii). 5/2000 [MASS=16516]/Microsomal glutathione S-transferase 3, a microsomal membrane protein that has glutathione-dependent transferase and peroxidase activities, member of a family that includes 5-lipoxygenase activating protein (ALOX5AP) and leukotriene-C4 synthase (LTC4S)                                                                                                                                             |
| SW:ETFA_HUMAN | ETFA    | 19 | 1  | 2.36 | 0.00 | SW:ETFA_HUMAN P13804 homo sapiens (human). electron transfer flavoprotein alpha-subunit precursor (alpha-ef). 5/2000 [MASS=35080]/Electron transfer flavoprotein alpha subunit, shuttles electrons between flavoprotein dehydrogenases of mitochondrial fatty acid metabolism and ubiquinone oxidoreductase, deficiency associated with Type II glutaric aciduria                                                                                                                                                                                                     |
| SW:MAZ_HUMAN  | MAZ     | 19 | 1  | 2.37 | 0.00 | SW:MAZ_HUMAN P56270 homo sapiens (human). myc-associated zinc finger protein (mazi) (purine-binding transcription factor) (pur-1) (zif87) (zif87). 7/1999 [MASS=48608]/MYC-associated zinc finger protein (purine-binding transcription factor), functions both as a positive and a negative regulator of gene expression and may also have roles in initiating and terminating transcription                                                                                                                                                                         |
| SW:THIL_HUMAN | ACAT1   | 19 | 2  | 2.44 | 0.44 | SW:THIL_HUMAN P24752 homo sapiens (human). acetyl-coa acetyltransferase, mitochondrial precursor (ec 2.3.1.9) (acetoacetyl-coa thiolase) (t2). 7/1999 [MASS=45200]/Acetyl-Coenzyme A acetyltransferase 1 (mitochondrial acetoacetyl-coenzyme A thiolase); mutations in the corresponding gene are associated with 3-ketothiolase deficiency                                                                                                                                                                                                                           |
| GP:AF161397_1 | HPCL2   | 19 | 2  | 2.53 | 0.16 | GP:AF161397_1 Homo sapiens HSPC279 mRNA, partial cds. [MASS=64199]/Homo sapiens mRNA for 2-hydroxyphytanoyl-CoA lyase; thiamine pyrophosphate dependent enzyme/2-Hydroxyphytanoyl-CoA lyase (peroxisomal 2-hydroxyphytanoyl-CoA lyase), catalyzes the thiamine pyrophosphate-dependent cleavage of C-C bonds during alpha-oxidation of 3-methyl-branched fatty acids to form formyl-CoA and 2-methyl-branched fatty aldehyde                                                                                                                                          |
| SW:TPP1_HUMAN | CLN2    | 19 | 1  | 2.62 | 0.00 | SW:TPP1_HUMAN O14773 homo sapiens (human). tripeptidyl-peptidase i precursor (ec 3.4.14.9) (tpp-i) (tripeptidyl aminopeptidase) (lysosomal pepstatin insensitive protease) (lpic). 5/2000 [MASS=61229]/Tripeptidyl peptidase I (ceroid-lipofuscinosis neuronal 2), a lysosomal serine-type peptidase required for degradation of ATP synthase subunit c (ATP5G1 and ATP5G2); mutations in the corresponding gene cause late infantile neuronal ceroid lipofuscinosis                                                                                                  |
| GP:AF002668_1 | DEGS    | 19 | 1  | 3.29 | 0.00 | GP:AF002668_1 Homo sapiens putative fatty acid desaturase MLD mRNA, complete cds; putative fatty acid desaturase. [MASS=37866]/Degenerative spermatocyte homolog (Drosophila), member of the membrane fatty acid desaturase family, regulates the biosynthesis of the epidermal growth factor receptor (EGFR)                                                                                                                                                                                                                                                         |
| SW:PA2M_HUMAN | PLA2G2A | 19 | 3  | 3.94 | 1.93 | SW:PA2M_HUMAN P14555 homo sapiens (human). phospholipase a2, membrane associated precursor (ec 3.1.1.4) (phosphatidylcholine 2-acylhydrolase) (group ii phospholipase a2) (non-pancreatic secretory phosph [MASS=16083]/Group IIA phospholipase A2, a secreted member of the phospholipase A2 family that hydrolyzes the phospholipid sn-2 ester bond, plays roles in phospholipid metabolism, host defense, and inflammation; gene loss reported in a sporadic colorectal tumor                                                                                      |
| GP:AJ002744_1 | GALNT7  | 19 | 1  | 4.00 | 0.00 | GP:AJ002744_1 Homo sapiens mRNA for UDP-GalNAc:polypeptide N-acetylgalactosaminyltransferase 7. [MASS=75402]/UDP-N-acetyl-alpha-D-galactosamine:polypeptide N-acetylgalactosaminyltransferase 7, enzyme that functions in O-glycosylation and is specific for partially glycosylated substrates                                                                                                                                                                                                                                                                       |

| Cellular Process # | Incyte Groups                     | # proteins in each class above 1.6 ICAT ratio | # proteins in each class observed (irrespective of ICAT ratio) | # of proteins in each class according to Incyte | # of observed proteins with ICAT ratio > 1.6 | # of observed proteins | representation of class compared to random expectation | -log10p-value for deviation from random expectation |
|--------------------|-----------------------------------|-----------------------------------------------|----------------------------------------------------------------|-------------------------------------------------|----------------------------------------------|------------------------|--------------------------------------------------------|-----------------------------------------------------|
| 38                 | RNA Splicing                      | 12                                            | 14                                                             | 99                                              | 350                                          | 1064                   | over                                                   | 4.22804                                             |
| 18                 | Energy Generation                 | 38                                            | 74                                                             | 292                                             | 350                                          | 1064                   | over                                                   | 3.52166                                             |
| 25                 | Nucleotide Metabolism             | 30                                            | 55                                                             | 375                                             | 350                                          | 1064                   | over                                                   | 3.45137                                             |
| 43                 | Vesicular Transport               | 12                                            | 68                                                             | 347                                             | 350                                          | 1064                   | under                                                  | 2.72852                                             |
| 19                 | Lipid, Fat, and Sterol Metabolism | 31                                            | 63                                                             | 468                                             | 350                                          | 1064                   | over                                                   | 2.63834                                             |
| 37                 | RNA Processing/Modification       | 25                                            | 48                                                             | 279                                             | 350                                          | 1064                   | over                                                   | 2.63503                                             |
| 35                 | Protein Synthesis                 | 17                                            | 85                                                             | 219                                             | 350                                          | 1064                   | under                                                  | 2.59070                                             |
| 42                 | Small Molecule Transport          | 26                                            | 61                                                             | 649                                             | 350                                          | 1064                   | over                                                   | 1.55238                                             |
| 7                  | Cell Cycle Control                | 9                                             | 42                                                             | 482                                             | 350                                          | 1064                   | under                                                  | 1.42875                                             |
| 34                 | Protein Modification              | 17                                            | 67                                                             | 882                                             | 350                                          | 1064                   | under                                                  | 1.35576                                             |
| 26                 | Other Metabolism                  | 15                                            | 33                                                             | 362                                             | 350                                          | 1064                   | over                                                   | 1.35386                                             |
| 41                 | Signal Transduction               | 44                                            | 145                                                            | 2194                                            | 350                                          | 1064                   | under                                                  | 1.22140                                             |
| 29                 | Pol II Transcription              | 5                                             | 25                                                             | 883                                             | 350                                          | 1064                   | under                                                  | 1.15959                                             |
| 5                  | Carbohydrate Metabolism           | 21                                            | 54                                                             | 317                                             | 350                                          | 1064                   | over                                                   | 1.13892                                             |
| 2                  | Amino Acid Metabolism             | 6                                             | 28                                                             | 169                                             | 350                                          | 1064                   | under                                                  | 1.13757                                             |
| 32                 | Protein Degradation               | 14                                            | 52                                                             | 344                                             | 350                                          | 1064                   | under                                                  | 1.09526                                             |
| 21                 | Membrane Fusion                   | 3                                             | 17                                                             | 60                                              | 350                                          | 1064                   | under                                                  | 1.04515                                             |
| 11                 | Cell Structure                    | 22                                            | 71                                                             | 429                                             | 350                                          | 1064                   | under                                                  | 1.00464                                             |
| 23                 | Mitosis                           | 2                                             | 13                                                             | 194                                             | 350                                          | 1064                   | under                                                  | 0.98223                                             |
| 16                 | Differentiation                   | 18                                            | 51                                                             | 1103                                            | 350                                          | 1064                   | over                                                   | 0.95353                                             |
| 33                 | Protein Folding                   | 7                                             | 28                                                             | 92                                              | 350                                          | 1064                   | under                                                  | 0.94442                                             |
| 15                 | DNA Synthesis                     | 4                                             | 7                                                              | 154                                             | 350                                          | 1064                   | over                                                   | 0.90786                                             |
| 10                 | Cell Stress                       | 11                                            | 29                                                             | 248                                             | 350                                          | 1064                   | over                                                   | 0.88650                                             |
| 6                  | Cell Adhesion                     | 11                                            | 33                                                             | 423                                             | 350                                          | 1064                   | over                                                   | 0.82934                                             |
| 36                 | Protein Translocation             | 9                                             | 28                                                             | 91                                              | 350                                          | 1064                   | under                                                  | 0.79253                                             |
| 40                 | Recombination                     | 4                                             | 8                                                              | 61                                              | 350                                          | 1064                   | over                                                   | 0.77904                                             |
| 31                 | Protein Complex Assembly          | 6                                             | 15                                                             | 90                                              | 350                                          | 1064                   | over                                                   | 0.75467                                             |
| 24                 | Nuclear-Cytoplasmic Transport     | 7                                             | 20                                                             | 82                                              | 350                                          | 1064                   | over                                                   | 0.73878                                             |
| 12                 | Chromatin/Chromosome Structure    | 4                                             | 9                                                              | 237                                             | 350                                          | 1064                   | over                                                   | 0.69617                                             |
| 39                 | RNA Turnover                      | 4                                             | 9                                                              | 31                                              | 350                                          | 1064                   | over                                                   | 0.69617                                             |
| 44                 | Virulence                         | 0                                             | 4                                                              | 21                                              | 350                                          | 1064                   | under                                                  | 0.69418                                             |
| 14                 | DNA Repair                        | 4                                             | 10                                                             | 166                                             | 350                                          | 1064                   | over                                                   | 0.64693                                             |
| 13                 | Cytokinesis                       | 1                                             | 1                                                              | 14                                              | 350                                          | 1064                   | over                                                   | 0.48287                                             |
| 8                  | Cell Elongation                   | 1                                             | 5                                                              | 10                                              | 350                                          | 1064                   | under                                                  | 0.47645                                             |
| 9                  | Cell Polarity                     | 1                                             | 3                                                              | 19                                              | 350                                          | 1064                   | over                                                   | 0.35162                                             |
| 20                 | Meiosis                           | 0                                             | 2                                                              | 41                                              | 350                                          | 1064                   | under                                                  | 0.34669                                             |
| 1                  | Aging                             | 0                                             | 1                                                              | 4                                               | 350                                          | 1064                   | under                                                  | 0.17324                                             |
| 4                  | Axonal Transport                  | 0                                             | 1                                                              | 5                                               | 350                                          | 1064                   | under                                                  | 0.17324                                             |
| 17                 | Dosage Compensation               | 0                                             | 1                                                              | 1                                               | 350                                          | 1064                   | under                                                  | 0.17324                                             |
| 27                 | Phosphate Metabolism              | 0                                             | 1                                                              | 34                                              | 350                                          | 1064                   | under                                                  | 0.17324                                             |
| 28                 | Pol III Transcription             | 0                                             | 1                                                              | 30                                              | 350                                          | 1064                   | under                                                  | 0.17324                                             |
| 3                  | Asymmetric cell division          | 0                                             | 0                                                              | 1                                               |                                              |                        |                                                        |                                                     |
| 22                 | Mitochondrial Transcription       | 0                                             | 0                                                              | 2                                               |                                              |                        |                                                        |                                                     |
| 30                 | Pol I Transcription               | 0                                             | 0                                                              | 16                                              |                                              |                        |                                                        |                                                     |

| Cellular Process # | Incyte Groups                     | # proteins in each class above 1.8 ICAT ratio | # proteins in each class observed (irrespective of ICAT ratio) | # of proteins in each class according to Incyte | # of observed proteins with ICAT ratio > 1.8 | # of observed proteins | representation of class compared to random expectation | -log10p-value for deviation from random expectation |
|--------------------|-----------------------------------|-----------------------------------------------|----------------------------------------------------------------|-------------------------------------------------|----------------------------------------------|------------------------|--------------------------------------------------------|-----------------------------------------------------|
| 18                 | Energy Generation                 | 36                                            | 74                                                             | 292                                             | 265                                          | 1064                   | over                                                   | 5.57096                                             |
| 38                 | RNA Splicing                      | 11                                            | 14                                                             | 99                                              | 265                                          | 1064                   | over                                                   | 4.50842                                             |
| 43                 | Vesicular Transport               | 7                                             | 68                                                             | 347                                             | 265                                          | 1064                   | under                                                  | 2.93280                                             |
| 19                 | Lipid, Fat, and Sterol Metabolism | 26                                            | 63                                                             | 468                                             | 265                                          | 1064                   | over                                                   | 2.85080                                             |
| 7                  | Cell Cycle Control                | 3                                             | 42                                                             | 482                                             | 265                                          | 1064                   | under                                                  | 2.66078                                             |
| 35                 | Protein Synthesis                 | 11                                            | 85                                                             | 219                                             | 265                                          | 1064                   | under                                                  | 2.62610                                             |
| 25                 | Nucleotide Metabolism             | 22                                            | 55                                                             | 375                                             | 265                                          | 1064                   | over                                                   | 2.33556                                             |
| 37                 | RNA Processing/Modification       | 18                                            | 48                                                             | 279                                             | 265                                          | 1064                   | over                                                   | 1.76290                                             |
| 23                 | Mitosis                           | 0                                             | 13                                                             | 194                                             | 265                                          | 1064                   | under                                                  | 1.62779                                             |
| 42                 | Small Molecule Transport          | 21                                            | 61                                                             | 649                                             | 265                                          | 1064                   | over                                                   | 1.59088                                             |
| 5                  | Carbohydrate Metabolism           | 19                                            | 54                                                             | 317                                             | 265                                          | 1064                   | over                                                   | 1.58108                                             |
| 41                 | Signal Transduction               | 33                                            | 145                                                            | 2194                                            | 265                                          | 1064                   | under                                                  | 1.16502                                             |
| 34                 | Protein Modification              | 13                                            | 67                                                             | 882                                             | 265                                          | 1064                   | under                                                  | 1.16481                                             |
| 33                 | Protein Folding                   | 4                                             | 28                                                             | 92                                              | 265                                          | 1064                   | under                                                  | 1.09479                                             |
| 26                 | Other Metabolism                  | 11                                            | 33                                                             | 362                                             | 265                                          | 1064                   | over                                                   | 1.09089                                             |
| 32                 | Protein Degradation               | 10                                            | 52                                                             | 344                                             | 265                                          | 1064                   | under                                                  | 1.06311                                             |
| 11                 | Cell Structure                    | 15                                            | 71                                                             | 429                                             | 265                                          | 1064                   | under                                                  | 1.05522                                             |
| 16                 | Differentiation                   | 15                                            | 51                                                             | 1103                                            | 265                                          | 1064                   | over                                                   | 1.02412                                             |
| 21                 | Membrane Fusion                   | 2                                             | 17                                                             | 60                                              | 265                                          | 1064                   | under                                                  | 0.94304                                             |
| 12                 | Chromatin/Chromosome Structure    | 4                                             | 9                                                              | 237                                             | 265                                          | 1064                   | over                                                   | 0.93698                                             |
| 2                  | Amino Acid Metabolism             | 5                                             | 28                                                             | 169                                             | 265                                          | 1064                   | under                                                  | 0.88677                                             |
| 6                  | Cell Adhesion                     | 9                                             | 33                                                             | 423                                             | 265                                          | 1064                   | over                                                   | 0.82593                                             |
| 36                 | Protein Translocation             | 8                                             | 28                                                             | 91                                              | 265                                          | 1064                   | over                                                   | 0.81978                                             |
| 10                 | Cell Stress                       | 6                                             | 29                                                             | 248                                             | 265                                          | 1064                   | under                                                  | 0.80291                                             |
| 31                 | Protein Complex Assembly          | 5                                             | 15                                                             | 90                                              | 265                                          | 1064                   | over                                                   | 0.78286                                             |
| 29                 | Pol II Transcription              | 5                                             | 25                                                             | 883                                             | 265                                          | 1064                   | under                                                  | 0.77824                                             |
| 24                 | Nuclear-Cytoplasmic Transport     | 6                                             | 20                                                             | 82                                              | 265                                          | 1064                   | over                                                   | 0.77179                                             |
| 8                  | Cell Elongation                   | 0                                             | 5                                                              | 10                                              | 265                                          | 1064                   | under                                                  | 0.62333                                             |
| 13                 | Cytokinesis                       | 1                                             | 1                                                              | 14                                              | 265                                          | 1064                   | over                                                   | 0.60370                                             |
| 14                 | DNA Repair                        | 2                                             | 10                                                             | 166                                             | 265                                          | 1064                   | under                                                  | 0.54782                                             |
| 39                 | RNA Turnover                      | 2                                             | 9                                                              | 31                                              | 265                                          | 1064                   | under                                                  | 0.52021                                             |
| 15                 | DNA Synthesis                     | 2                                             | 7                                                              | 154                                             | 265                                          | 1064                   | over                                                   | 0.50565                                             |
| 40                 | Recombination                     | 2                                             | 8                                                              | 61                                              | 265                                          | 1064                   | over                                                   | 0.50496                                             |
| 44                 | Virulence                         | 0                                             | 4                                                              | 21                                              | 265                                          | 1064                   | under                                                  | 0.49839                                             |
| 9                  | Cell Polarity                     | 0                                             | 3                                                              | 19                                              | 265                                          | 1064                   | under                                                  | 0.37359                                             |
| 20                 | Meiosis                           | 0                                             | 2                                                              | 41                                              | 265                                          | 1064                   | under                                                  | 0.24893                                             |
| 1                  | Aging                             | 0                                             | 1                                                              | 4                                               | 265                                          | 1064                   | under                                                  | 0.12439                                             |
| 4                  | Axonal Transport                  | 0                                             | 1                                                              | 5                                               | 265                                          | 1064                   | under                                                  | 0.12439                                             |
| 17                 | Dosage Compensation               | 0                                             | 1                                                              | 1                                               | 265                                          | 1064                   | under                                                  | 0.12439                                             |
| 27                 | Phosphate Metabolism              | 0                                             | 1                                                              | 34                                              | 265                                          | 1064                   | under                                                  | 0.12439                                             |
| 28                 | Pol III Transcription             | 0                                             | 1                                                              | 30                                              | 265                                          | 1064                   | under                                                  | 0.12439                                             |
| 3                  | Asymmetric cell division          | 0                                             | 0                                                              | 1                                               |                                              |                        |                                                        |                                                     |
| 22                 | Mitochondrial Transcription       | 0                                             | 0                                                              | 2                                               |                                              |                        |                                                        |                                                     |
| 30                 | Pol I Transcription               | 0                                             | 0                                                              | 16                                              |                                              |                        |                                                        |                                                     |

| Cellular Process # | Incyte Groups                     | # proteins in each class above 2.0 ICAT ratio | # proteins in each class observed (irrespective of ICAT ratio) | # of proteins in each class according to Incyte | # of observed proteins with ICAT ratio > 2.0 | # of observed proteins | representation of class compared to random expectation | -log <sub>10</sub> p-value for deviation from random expectation |
|--------------------|-----------------------------------|-----------------------------------------------|----------------------------------------------------------------|-------------------------------------------------|----------------------------------------------|------------------------|--------------------------------------------------------|------------------------------------------------------------------|
| 43                 | Vesicular Transport               | 2                                             | 68                                                             | 347                                             | 203                                          | 1064                   | under                                                  | 4.31178                                                          |
| 18                 | Energy Generation                 | 27                                            | 74                                                             | 292                                             | 203                                          | 1064                   | over                                                   | 3.88873                                                          |
| 38                 | RNA Splicing                      | 9                                             | 14                                                             | 99                                              | 203                                          | 1064                   | over                                                   | 3.67911                                                          |
| 7                  | Cell Cycle Control                | 1                                             | 42                                                             | 482                                             | 203                                          | 1064                   | under                                                  | 2.92983                                                          |
| 2                  | Amino Acid Metabolism             | 0                                             | 28                                                             | 169                                             | 203                                          | 1064                   | under                                                  | 2.61137                                                          |
| 35                 | Protein Synthesis                 | 8                                             | 85                                                             | 219                                             | 203                                          | 1064                   | under                                                  | 2.23742                                                          |
| 25                 | Nucleotide Metabolism             | 17                                            | 55                                                             | 375                                             | 203                                          | 1064                   | over                                                   | 1.93243                                                          |
| 19                 | Lipid, Fat, and Sterol Metabolism | 18                                            | 63                                                             | 468                                             | 203                                          | 1064                   | over                                                   | 1.70628                                                          |
| 11                 | Cell Structure                    | 8                                             | 71                                                             | 429                                             | 203                                          | 1064                   | under                                                  | 1.55380                                                          |
| 37                 | RNA Processing/Modification       | 14                                            | 48                                                             | 279                                             | 203                                          | 1064                   | over                                                   | 1.53325                                                          |
| 5                  | Carbohydrate Metabolism           | 15                                            | 54                                                             | 317                                             | 203                                          | 1064                   | over                                                   | 1.45556                                                          |
| 16                 | Differentiation                   | 14                                            | 51                                                             | 1103                                            | 203                                          | 1064                   | over                                                   | 1.37354                                                          |
| 42                 | Small Molecule Transport          | 16                                            | 61                                                             | 649                                             | 203                                          | 1064                   | over                                                   | 1.35148                                                          |
| 23                 | Mitosis                           | 0                                             | 13                                                             | 194                                             | 203                                          | 1064                   | under                                                  | 1.20277                                                          |
| 26                 | Other Metabolism                  | 9                                             | 33                                                             | 362                                             | 203                                          | 1064                   | over                                                   | 1.09619                                                          |
| 41                 | Signal Transduction               | 28                                            | 145                                                            | 2194                                            | 203                                          | 1064                   | over                                                   | 1.04659                                                          |
| 10                 | Cell Stress                       | 3                                             | 29                                                             | 248                                             | 203                                          | 1064                   | under                                                  | 0.99077                                                          |
| 21                 | Membrane Fusion                   | 1                                             | 17                                                             | 60                                              | 203                                          | 1064                   | under                                                  | 0.96511                                                          |
| 34                 | Protein Modification              | 11                                            | 67                                                             | 882                                             | 203                                          | 1064                   | under                                                  | 0.94544                                                          |
| 6                  | Cell Adhesion                     | 4                                             | 33                                                             | 423                                             | 203                                          | 1064                   | under                                                  | 0.93432                                                          |
| 32                 | Protein Degradation               | 9                                             | 52                                                             | 344                                             | 203                                          | 1064                   | under                                                  | 0.85372                                                          |
| 24                 | Nuclear-Cytoplasmic Transport     | 5                                             | 20                                                             | 82                                              | 203                                          | 1064                   | over                                                   | 0.78265                                                          |
| 33                 | Protein Folding                   | 4                                             | 28                                                             | 92                                              | 203                                          | 1064                   | under                                                  | 0.77086                                                          |
| 31                 | Protein Complex Assembly          | 4                                             | 15                                                             | 90                                              | 203                                          | 1064                   | over                                                   | 0.75169                                                          |
| 13                 | Cytokinesis                       | 1                                             | 1                                                              | 14                                              | 203                                          | 1064                   | over                                                   | 0.71945                                                          |
| 36                 | Protein Translocation             | 5                                             | 28                                                             | 91                                              | 203                                          | 1064                   | under                                                  | 0.71401                                                          |
| 29                 | Pol II Transcription              | 4                                             | 25                                                             | 883                                             | 203                                          | 1064                   | under                                                  | 0.70268                                                          |
| 15                 | DNA Synthesis                     | 2                                             | 7                                                              | 154                                             | 203                                          | 1064                   | over                                                   | 0.57497                                                          |
| 40                 | Recombination                     | 2                                             | 8                                                              | 61                                              | 203                                          | 1064                   | over                                                   | 0.54164                                                          |
| 12                 | Chromatin/Chromosome Structure    | 2                                             | 9                                                              | 237                                             | 203                                          | 1064                   | over                                                   | 0.52419                                                          |
| 14                 | DNA Repair                        | 2                                             | 10                                                             | 166                                             | 203                                          | 1064                   | over                                                   | 0.51907                                                          |
| 39                 | RNA Turnover                      | 1                                             | 9                                                              | 31                                              | 203                                          | 1064                   | under                                                  | 0.50014                                                          |
| 8                  | Cell Elongation                   | 0                                             | 5                                                              | 10                                              | 203                                          | 1064                   | under                                                  | 0.46066                                                          |
| 44                 | Virulence                         | 0                                             | 4                                                              | 21                                              | 203                                          | 1064                   | under                                                  | 0.36833                                                          |
| 9                  | Cell Polarity                     | 0                                             | 3                                                              | 19                                              | 203                                          | 1064                   | under                                                  | 0.27610                                                          |
| 20                 | Meiosis                           | 0                                             | 2                                                              | 41                                              | 203                                          | 1064                   | under                                                  | 0.18397                                                          |
| 1                  | Aging                             | 0                                             | 1                                                              | 4                                               | 203                                          | 1064                   | under                                                  | 0.09194                                                          |
| 4                  | Axonal Transport                  | 0                                             | 1                                                              | 5                                               | 203                                          | 1064                   | under                                                  | 0.09194                                                          |
| 17                 | Dosage Compensation               | 0                                             | 1                                                              | 1                                               | 203                                          | 1064                   | under                                                  | 0.09194                                                          |
| 27                 | Phosphate Metabolism              | 0                                             | 1                                                              | 34                                              | 203                                          | 1064                   | under                                                  | 0.09194                                                          |
| 28                 | Pol III Transcription             | 0                                             | 1                                                              | 30                                              | 203                                          | 1064                   | under                                                  | 0.09194                                                          |
| 3                  | Asymmetric cell division          | 0                                             | 0                                                              | 1                                               |                                              |                        |                                                        |                                                                  |
| 22                 | Mitochondrial Transcription       | 0                                             | 0                                                              | 2                                               |                                              |                        |                                                        |                                                                  |
| 30                 | Pol I Transcription               | 0                                             | 0                                                              | 16                                              |                                              |                        |                                                        |                                                                  |

| Cellular Process         | Gene   | Functional Group | XPRESS Count | d0:d8 ratio | d0:d8 StdDev | Description                                                                                                                                                                                                                                                                                                                                                                                                                                                                          |
|--------------------------|--------|------------------|--------------|-------------|--------------|--------------------------------------------------------------------------------------------------------------------------------------------------------------------------------------------------------------------------------------------------------------------------------------------------------------------------------------------------------------------------------------------------------------------------------------------------------------------------------------|
| <b>Energy Generation</b> |        |                  |              |             |              |                                                                                                                                                                                                                                                                                                                                                                                                                                                                                      |
| SW:ACDV_HUMAN            | ACADVL | 18               | 1            | 0.32        | 0.00         | SW:ACDV_HUMAN P49748 homo sapiens (human). acyl-coa dehydrogenase, very-long-chain specific, mitochondrial precursor (ec 1.3.99.-) (vlcad). 5/2000 [MASS=70390]/Very long chain acyl-coenzyme A dehydrogenase, oxidizes straight chain acyl-CoAs in the initial step of fatty acid beta-oxidation, severe deficiency results in infant cardiomyopathy with high mortality, mild deficiency results in hypoketotic hypoglycemia                                                       |
| SW:PHS2_HUMAN            | PYGM   | 18               | 1            | 0.36        | 0.00         | SW:PHS2_HUMAN P11217 homo sapiens (human). glycogen phosphorylase, muscle form (ec 2.4.1.1) (myophosphorylase). 5/2000 [MASS=97092]/Muscle glycogen phosphorylase, participates in glycogen catabolism; mutation of corresponding gene is associated with McArdle disease                                                                                                                                                                                                            |
| SW:PHS3_HUMAN            | PYGB   | 18               | 10           | 0.48        | 0.06         | SW:PHS3_HUMAN P11216 homo sapiens (human). glycogen phosphorylase, brain form (ec 2.4.1.1). 10/1996 [MASS=96683]/Brain glycogen phosphorylase, catalyzes the rate-limiting step in glycogen catabolism, activated by AMP and phosphorylation, may play a role in intestinal development; associated with gastric carcinomas displaying a differentiated intestinal phenotype                                                                                                         |
| SW:GLYG_HUMAN            | GYG    | 18               | 6            | 0.51        | 0.11         | SW:GLYG_HUMAN P46976 homo sapiens (human). glycogenin-1 (ec 2.4.1.186). 7/1999 [MASS=37347]/Glycogenin (glycogenin glucosyltransferase), autocatalytic and self-glucosylating enzyme that primes de novo glycogen synthesis                                                                                                                                                                                                                                                          |
| SW:NC5R_HUMAN            | DIA1   | 18               | 2            | 0.60        | 0.02         | SW:NC5R_HUMAN P00387 homo sapiens (human). nadh-cytochrome b5 reductase (ec 1.6.2.2) (b5r). 11/1997 [MASS=34104]/NADH-dependent cytochrome b5 reductase (diaphorase), soluble erythrocyte-specific form functions in methemoglobin reduction, ubiquitous membrane-bound form functions in lipid metabolism; mutations in the gene cause methemoglobinemia types I and II                                                                                                             |
| SW:GFA1_HUMAN            | GFPT1  | 18               | 5            | 0.72        | 0.06         | SW:GFA1_HUMAN Q06210 homo sapiens (human). glucosamine--fructose-6-phosphate aminotransferase [isomerizing] 1 (ec 2.6.1.16) (hexosephosphate aminotransferase 1) (d-fructose-6-phosphate amidotransferase [MASS=76616]/Glutamine-fructose-6-phosphate transaminase 1, catalyzes the first step in glucosamine formation, modulates glucose flux and functions in development of insulin resistance, upregulation in kidney associated with diabetic nephropathy                      |
| SW:UGS1_HUMAN            | GYS1   | 18               | 5            | 0.73        | 0.15         | SW:UGS1_HUMAN P13807 homo sapiens (human). glycogen [starch] synthase, muscle (ec 2.4.1.11). 5/2000 [MASS=83786]/Glycogen synthase 1 (muscle), catalyzes transfer of a glucosyl residue from UDP-glucose to glycogen, stimulated by insulin, Acipimox and Flouxetine; mutations in the corresponding gene may be associated with non-insulin-dependent diabetes mellitus                                                                                                             |
| SW:WFS1_HUMAN            | WFS1   | 18               | 1            | 0.75        | 0.00         | SW:WFS1_HUMAN O76024 homo sapiens (human). wolframin. 5/2000 [MASS=100306]/Wolfram syndrome 1 (wolframin), may play a role in islet beta cell and neuron survival, may influence normal hearing and vision; gene mutation is detected in Wolfram syndrome and some types of hearing loss and may influence type 2 diabetes susceptibility                                                                                                                                            |
| SW:G3P2_HUMAN            | GAPD   | 18               | 2            | 0.85        | 0.01         | SW:G3P2_HUMAN P04406 homo sapiens (human). glyceraldehyde 3-phosphate dehydrogenase, liver (ec 1.2.1.12). 7/1999 [MASS=35922]/Glyceraldehyde-3-phosphate dehydrogenase, catalyzes reversible oxidation and phosphorylation of glyceraldehyde-3-phosphate to 1,3-diphosphoglycerate in glycolysis, involved in apoptosis, may play a role in neurodegeneration in diseases like Alzheimer's                                                                                           |
| SW:ENOB_HUMAN            | ENO3   | 18               | 4            | 0.86        | 0.13         | SW:ENOB_HUMAN P13929 homo sapiens (human). beta enolase (ec 4.2.1.11) (2-phospho-d-glycerate hydro-lyase) (skeletal muscle enolase) (mse). 7/1998 [MASS=46856]/Enolase 3 (muscle-specific enolase, beta enolase), a putative enolase which catalyzes the conversion of 2-phospho-D-glycerate to phosphoenolpyruvate in muscle glycolysis, deficiency is associated with exercise intolerance and myalgias                                                                            |
| SW:KCRB_HUMAN            | CKB    | 18               | 3            | 0.88        | 0.26         | SW:KCRB_HUMAN P12277 homo sapiens (human). creatine kinase, b chain (ec 2.7.3.2) (b-ck). 7/1999 [MASS=42644]/Brain creatine kinase, involved in energy homeostasis, expression is elevated in some forms of cancer; CK-MB is a dimer of subunits CKM and CKB, and is an important serum marker for acute myocardial infarction                                                                                                                                                       |
| SW:GDE_HUMAN             | AGL    | 18               | 18           | 0.92        | 0.22         | SW:GDE_HUMAN P35573 homo sapiens (human). glycogen debranching enzyme (glycogen debrancher) [includes: 4-alpha-glucanotransferase (ec 2.4.1.25) (oligo-1,4-1,4-glucontransferase); amylo-1,6-glucosidase [MASS=172497]/Glycogen debranching enzyme, (amylo-1,6-glucosidase 4-alpha-glucanotransferase), catalyzes glycantransferase and glucosidase activities required for glycogen degradation; mutations and dysregulation are associated with type III glycogen storage diseases |
| SW:PGK1_HUMAN            | PGK1   | 18               | 16           | 0.93        | 0.18         | SW:PGK1_HUMAN P00558 homo sapiens (human). phosphoglycerate kinase 1 (ec 2.7.2.3) (primer recognition protein 2) (prp 2). 7/1999 [MASS=44597]/Phosphoglycerate kinase 1, catalyzes conversion of 1,3-diphosphoglycerate to 3-phosphoglycerate in glycolysis, forming one molecule of ATP; PGK1 gene transcription is induced by hypoxia and mutation is associated with non-spherocytic hemolytic anemia                                                                             |
| SW:ODO1_HUMAN            | OGDH   | 18               | 9            | 0.94        | 0.18         | SW:ODO1_HUMAN Q02218 homo sapiens (human). 2-oxoglutarate dehydrogenase e1 component, mitochondrial precursor (ec 1.2.4.2) (alpha-ketoglutarate dehydrogenase). 7/1999 [MASS=113475]/2-Oxoglutarate dehydrogenase (alpha-ketoglutarate dehydrogenase), E1 component of the complex that converts alpha-ketoglutarate to succinyl coenzyme A in the Krebs cycle; deficiency has been observed in Alzheimer and Parkinson disease                                                      |
| SW:K6PL_HUMAN            | PFKL   | 18               | 8            | 0.97        | 0.17         | SW:K6PL_HUMAN P17858 homo sapiens (human). 6-phosphofructokinase, liver type (ec 2.7.1.11) (phosphofructokinase 1) (phosphohexokinase) (phosphofructo-1-kinase isozyme b). 10/1996 [MASS=85148]/Liver phosphofructokinase, catalyses the phosphorylation of fructose-6-phosphate to fructose-1,6-bisphosphate in glycolysis, deficiency is linked to glycogenesis type VII while overexpression may lead to the cognitive disabilities of Down's syndrome                            |

|               |          |    |    |      |      |                                                                                                                                                                                                                                                                                                                                                                                                                                                                        |
|---------------|----------|----|----|------|------|------------------------------------------------------------------------------------------------------------------------------------------------------------------------------------------------------------------------------------------------------------------------------------------------------------------------------------------------------------------------------------------------------------------------------------------------------------------------|
| SW:KPB1_HUMAN | PHKA1    | 18 | 3  | 1.00 | 0.09 | SW:KPB1_HUMAN P46020 homo sapiens (human). phosphorylase b kinase alpha regulatory chain, skeletal muscle isoform (phosphorylase kinase alpha m subunit). 2/1996 [MASS=137338]/Phosphorylase kinase regulatory subunit alpha-1 (muscle), which phosphorylates and thereby activates muscle-specific glycogen phosphorylase (PYGM); mutations in the corresponding gene are associated with muscle glycogenosis, a glycogen storage disease                             |
| SW:TPIS_HUMAN | TPI1     | 18 | 9  | 1.00 | 0.18 | SW:TPIS_HUMAN P00938 homo sapiens (human), and pan troglodytes (chimpanzee). triosephosphate isomerase (ec 5.3.1.1) (tim). 7/1998 [MASS=26538]/Triosephosphate isomerase 1, catalyzes the reversible interconversion of glyceraldehyde 3-phosphate and dihydroxyacetone phosphate in glycolysis; variant forms cause hemolytic anemia and neurodegeneration; variant form is an antigen on melanoma cells                                                              |
| SW:ENOA_HUMAN | ENO1     | 18 | 3  | 1.01 | 0.08 | SW:ENOA_HUMAN P06733 homo sapiens (human). alpha enolase (ec 4.2.1.11) (2-phospho-d-glycerate hydro-lyase) (non-neural enolase) (nne) (phosphopyruvate hydratase). 7/1998 [MASS=47038]/Enolase 1 (alpha enolase), converts 2-phospho-D-glycerate to phosphoenolpyruvate in glycolysis, an autoantigen in multiple autoimmune diseases, shorter alternative form c-myc promoter binding protein (MPB1) is a transcriptional repressor                                   |
| GP:AJ131612_1 | Slc25a10 | 18 | 1  | 1.02 | 0.00 | GP:AJ131612_1 Homo sapiens dic gene, exons 1-11. [MASS=31325]/Solute carrier family 25 member 10 (dicarboxylate carrier), a putative dicarboxylic acid transporter predicted to reside in the inner mitochondrial membrane, may be involved in gluconeogenesis                                                                                                                                                                                                         |
| SW:ODPB_HUMAN | PDHB     | 18 | 1  | 1.05 | 0.00 | SW:ODPB_HUMAN P11177 homo sapiens (human). pyruvate dehydrogenase e1 component beta subunit, mitochondrial precursor (ec 1.2.4.1) (pdhe1-b). 7/1999 [MASS=39219]/E1 beta subunit of pyruvate dehydrogenase complex, oxidatively decarboxylates pyruvate to acetyl-CoA                                                                                                                                                                                                  |
| SW:HEMZ_HUMAN | FECH     | 18 | 8  | 1.06 | 0.19 | SW:HEMZ_HUMAN P22830 homo sapiens (human). ferrochelatase precursor (ec 4.99.1.1) (protoheme ferro-lyase) (heme synthetase). 12/1998 [MASS=47834]/Ferrochelatase (protoheme ferrochelatase), catalyzes the final step in the heme biosynthetic pathway by inserting ferrous iron into protoporphyrin IX to form heme; reduced activity and mutations in the corresponding gene are associated with protoporphyria                                                      |
| SW:HKK1_HUMAN | HK1      | 18 | 5  | 1.07 | 0.11 | SW:HKK1_HUMAN P19367 homo sapiens (human). hexokinase, type i (ec 2.7.1.1) (hk i) (brain form hexokinase). 12/1998 [MASS=102503]/Hexokinase Type I (ATP:D-hexose 6-phosphotransferase), catalyzes ATP-dependent conversion of glucose to glucose 6 phosphate in glycolysis, deficiency may lead to non-spherocytic hemolytic anemia                                                                                                                                    |
| SW:CPT2_HUMAN | CPT2     | 18 | 1  | 1.08 | 0.00 | SW:CPT2_HUMAN P23786 homo sapiens (human). carnitine o-palmitoyltransferase ii, mitochondrial precursor (ec 2.3.1.21) (cpt ii). 5/2000 [MASS=73777]/Carnitine palmitoyltransferase II, a mitochondrial long-chain fatty acid oxidation enzyme; mutations are associated with a lipid metabolism disorder that includes recurrent myopathy with progressive rhabdomyolysis, muscle weakness and myoglobinuria                                                           |
| SW:KPY1_HUMAN | PKM2     | 18 | 19 | 1.09 | 0.24 | SW:KPY1_HUMAN P14618 homo sapiens (human). pyruvate kinase, m1 isozyme (ec 2.7.1.40) (pyruvate kinase muscle isozyme) (cytosolic thyroid hormone-binding protein) (cthbp) (thbp1). 12/1998 [MASS=57747]/Pyruvate kinase muscle (pyruvate kinase 3), glycolytic enzyme that converts phosphoenolpyruvate to pyruvate with phosphorylation of ADP to ATP, exists as M1 and M2 alternative forms, may have roles in viral transformation and cell differentiation         |
| SW:FLRE_HUMAN | BLVRB    | 18 | 3  | 1.12 | 0.12 | SW:FLRE_HUMAN P30043 homo sapiens (human). flavin reductase (ec 1.6.99.1) (fr) (nadh-dependent diaphorase) (nadh-flavin reductase) (flr) (biliverdin reductase b) (ec 1.3.1.24) (bvr-b) (biliverdin-ix b [MASS=21988]/Biliverdin-IX beta reductase (NADPH-flavin reductase), catalyzes the conversion of biliverdin-IX beta to bilirubin-IX beta, the major heme catabolite produced during early fetal development; also has NAD(P)H-linked flavin reductase activity |
| SW:COXS_HUMAN | COX17    | 18 | 1  | 1.18 | 0.00 | SW:COXS_HUMAN Q14061 homo sapiens (human). cytochrome c oxidase copper chaperone. 7/1999 [MASS=6784]/Cytochrome c oxidase assembly protein 17, a putative copper binding protein, may function to transport copper to mitochondria for assembly into cytochrome oxidase complex; mutation does not appear to be a common cause of COX deficiency disorders                                                                                                             |
| SW:INSR_HUMAN | INSR     | 18 | 2  | 1.22 | 0.02 | SW:INSR_HUMAN P06213 homo sapiens (human). insulin receptor precursor (ec 2.7.1.112) (ir). 5/2000 [MASS=156281]/Insulin receptor, a transmembrane receptor protein tyrosine kinase involved in carbohydrate metabolism, energy pathways, and cell growth; gene mutation is associated with insulin-resistant diabetes mellitus and leprechaunism                                                                                                                       |
| SW:THIK_HUMAN | ACAA1    | 18 | 15 | 1.26 | 0.25 | SW:THIK_HUMAN P09110 homo sapiens (human). 3-ketoacyl-coa thiolase, peroxisomal precursor (ec 2.3.1.16) (beta-ketothiolase) (acetyl-coa acyltransferase) (peroxisomal 3-oxoacyl-coa thiolase). 7/1999 [MASS=44292]/Peroxisomal 3-oxoacyl-coenzyme A thiolase (peroxisomal 3-ketoacyl-Coenzyme A thiolase), functions in peroxisomal beta-oxidation of fatty acids, deficiency is associated with rhizomelic chondrodysplasia punctata (RCDP)                           |
| SW:MDHC_HUMAN | MDH1     | 18 | 4  | 1.27 | 0.10 | SW:MDHC_HUMAN P40925 homo sapiens (human). malate dehydrogenase, cytoplasmic (ec 1.1.1.37). 5/2000 [MASS=36295]/Cytosolic malate dehydrogenase, part of the malate-aspartate shuttle where it putatively catalyzes the reduction of oxaloacetate to malate                                                                                                                                                                                                             |
| SW:ACON_HUMAN | ACO2     | 18 | 1  | 1.27 | 0.00 | SW:ACON_HUMAN Q99798 homo sapiens (human). aconitate hydratase, mitochondrial precursor (ec 4.2.1.3) (citrate hydro-lyase) (aconitase). 5/2000 [MASS=85425]/Aconitase 2 mitochondrial (aconitate hydratase), catalyzes the conversion of citrate to cis-aconitate in the tricarboxylic acid cycle, may be involved in iron homeostasis; deficiency may be associated with lifelong exercise intolerance                                                                |
| SW:CPT1_HUMAN | CPT1A    | 18 | 1  | 1.30 | 0.00 | SW:CPT1_HUMAN P50416 homo sapiens (human). carnitine o-palmitoyltransferase i, mitochondrial liver isoform (ec 2.3.1.21) (cpt i) (cpt-i). 7/1999 [MASS=88429]/Liver carnitine palmitoyltransferase I, enzyme of long-chain fatty acid beta-oxidation pathway; mutations in the corresponding gene are associated with carnitine palmitoyltransferase I deficiency                                                                                                      |

|               |               |    |    |      |      |                                                                                                                                                                                                                                                                                                                                                                                                                                                                                  |
|---------------|---------------|----|----|------|------|----------------------------------------------------------------------------------------------------------------------------------------------------------------------------------------------------------------------------------------------------------------------------------------------------------------------------------------------------------------------------------------------------------------------------------------------------------------------------------|
| SW:D3D2_HUMAN | DCI           | 18 | 3  | 1.31 | 0.20 | SW:D3D2_HUMAN P42126 homo sapiens (human). 3,2-trans-enoyl-coa isomerase, mitochondrial precursor (ec 5.3.3.8) (dodecenoyl-coa delta-isomerase). 7/1999 [MASS=32816]/Dodecenoyl-Coenzyme A delta isomerase (3,2 trans-enoyl-Coenzyme A isomerase), catalyzes the isomerization of 3-cis and 3-trans enoyl CoA esters to 2-trans enoyl CoA esters, functions in mitochondrial beta-oxidation of unsaturated fatty acids                                                           |
| PIR2:JC5938   | Txnl          | 18 | 2  | 1.31 | 0.01 | PIR2:JC5938 thioredoxin-like protein - human [MASS=32251]/Thioredoxin-like 32, a thioredoxin related protein that has thioredoxin-like reducing activity                                                                                                                                                                                                                                                                                                                         |
| SW:ECH1_HUMAN | ECH1          | 18 | 28 | 1.36 | 0.24 | SW:ECH1_HUMAN Q13011 homo sapiens (human). delta3,5-delta2,4-dienoyl-coa isomerase precursor (ec 5.3.3.-). 7/1999 [MASS=35994]/Enoyl Coenzyme A hydratase 1 (peroxisomal), putative enzyme that may play a role in peroxisomal beta-oxidation                                                                                                                                                                                                                                    |
| SW:KG3B_HUMAN | GSK3B         | 18 | 1  | 1.36 | 0.00 | SW:KG3B_HUMAN P49841 homo sapiens (human). glycogen synthase kinase-3 beta (ec 2.7.1.37) (gsk-3 beta). 7/1999 [MASS=46768]/Glycogen synthase kinase-3 beta, a serine threonine protein kinase that phosphorylates several cytoplasmic and nuclear proteins, involved in embryonic development, and may hyperphosphorylate tau (MAPT) in                                                                                                                                          |
| SW:KCRU_HUMAN | CKMT1         | 18 | 6  | 1.45 | 0.16 | SW:KCRU_HUMAN P12532 homo sapiens (human). creatine kinase, ubiquitous mitochondrial precursor (ec 2.7.3.2) (u-mtck) (mia-ck) (acidic-type mitochondrial creatine kinase). 7/1999 [MASS=47037]/Mitochondrial creatine kinase 1 (ubiquitous), mitochondrial isoform that has a probable role in the phosphocreatine shuttle, plays a role in energy pathways; inactivation is involved in anthracycline cardiotoxicity                                                            |
| SW:ACPM_HUMAN | NDUFAB1       | 18 | 3  | 1.46 | 0.23 | SW:ACPM_HUMAN O14561 homo sapiens (human). acyl carrier protein, mitochondrial precursor (acp) (nadh-ubiquinone oxidoreductase 9.6 kda subunit) (ec 1.6.5.3) (ec 1.6.99.3) (ci-sdap). 5/2000 [MASS=14806]/NADH-ubiquinone oxidoreductase subunit of alpha-beta subcomplex 1 (8 kD), a probable acyl carrier component of the multiprotein complex that transports electrons from NADH to ubiquinone, present within the hydrophobic fraction of complex I                        |
| SW:OBRG_HUMAN | LEPR          | 18 | 1  | 1.46 | 0.00 | SW:OBRG_HUMAN O15243 homo sapiens (human). leptin receptor gene-related protein (ob-r gene related protein) (ob-rgrp). 7/1999 [MASS=14254]/Leptin receptor, member of the gp130 (IL6ST) cytokine-receptor family, signals through the JAK/STAT cascade and functions in regulation of appetite, body fat, bone formation, and reproduction; mutations in the gene cause obesity and pituitary dysfunction                                                                        |
| SW:CAOP_HUMAN | ACOX1 or ACOX | 18 | 1  | 1.53 | 0.00 | SW:CAOP_HUMAN Q15067 homo sapiens (human). acyl-coenzyme a oxidase, peroxisomal (ec 1.3.3.6) (palmitoyl-coa oxidase) (aox). 11/1997 [MASS=74502]/Peroxisomal acyl-coenzyme A oxidase, catalyzes the first step in very long chain fatty acid beta-oxidation, desaturates acyl-CoA to 2-trans-enoyl-CoA and produces hydrogen peroxide                                                                                                                                            |
| SW:APE1_HUMAN | APEX          | 18 | 13 | 1.57 | 0.38 | SW:APE1_HUMAN P27695 homo sapiens (human). dna-(apurinic or apyrimidinic site) lyase (ec 4.2.99.18) (ap endonuclease 1) (apex nuclease) (apen) (ref-1 protein). 12/1998 [MASS=35423]/Apurinic/apyrimidinic endonuclease 1, multifunctional DNA repair enzyme that coordinates the repair of abasic sites and repair synthesis, acts as a transcription regulator; mutations may correlate with inclusion body myositis and colorectal tumorigenesis                              |
| SW:DLDH_HUMAN | DLD           | 18 | 10 | 1.59 | 0.59 | SW:DLDH_HUMAN P09622 homo sapiens (human). dihydrolipoamide dehydrogenase, mitochondrial precursor (ec 1.8.1.4). 5/2000 [MASS=54150]/Dihydrolipoamide dehydrogenase, E3 component of pyruvate dehydrogenase complex, also component of alpha-ketoglutarate dehydrogenase and branched-chain alpha-ketoacid dehydrogenase complexes and the glycine cleavage system                                                                                                               |
| SW:CISY_HUMAN | CS            | 18 | 1  | 1.62 | 0.00 | SW:CISY_HUMAN O75390 homo sapiens (human). citrate synthase, mitochondrial precursor (ec 4.1.3.7). 7/1999 [MASS=51706]/Citrate synthase, converts acetyl-CoA and oxaloacetate into citrate plus CoA in the tricarboxylic acid cycle                                                                                                                                                                                                                                              |
| SW:ADRO_HUMAN | FDXR          | 18 | 1  | 1.82 | 0.00 | SW:ADRO_HUMAN P22570 homo sapiens (human). nadph:adrenodoxin oxidoreductase precursor (ec 1.18.1.2) (adrenodoxin reductase) (ferredoxin-nadp(+) reductase). 7/1999 [MASS=53809]/Ferredoxin reductase, mitochondrial flavoprotein that mediates electron transport from NADPH to cytochrome P450scc                                                                                                                                                                               |
| SW:ADT1_HUMAN | SLC25A4       | 18 | 2  | 1.84 | 0.94 | SW:ADT1_HUMAN P12235 homo sapiens (human). adp,atp carrier protein, heart/skeletal muscle isoform t1 (adp/atp translocase 1) (adenine nucleotide translocator 1) (ant 1). 10/1994 [MASS=33064]/Solute carrier family 25 member 4, an ADP:ATP transporter that may act in mitochondrial genome stability, altered transport capacity due to autoimmune response leads to myocarditis and cardiomyopathy; mutation causes progressive external ophthalmoplegia                     |
| SW:NUAM_HUMAN | NDUFS1        | 18 | 1  | 1.87 | 0.00 | SW:NUAM_HUMAN P28331 homo sapiens (human). nadh-ubiquinone oxidoreductase 75 kda subunit precursor (ec 1.6.5.3) (ec 1.6.99.3) (complex I-75kd) (ci-75kd). 7/1999 [MASS=79574]/NADH-dehydrogenase ubiquinone Fe-S protein 1 (75kD), a multiprotein complex that transports electrons from NADH to ubiquinone, present within the hydrophobic fraction of complex I; genetic variants are associated with mitochondrial complex I deficiency                                       |
| SW:ECHB_HUMAN | HADHB         | 18 | 4  | 1.87 | 0.07 | SW:ECHB_HUMAN P55084 homo sapiens (human). trifunctional enzyme beta subunit, mitochondrial precursor (tp-beta) [includes: 3-ketoacyl-coa thiolase (ec 2.3.1.16) (acetyl-coa acyltransferase) (beta-ketothiolase) (MASS=51294)/3-hydroxyacyl-CoA dehydrogenase, 3-ketoacyl-CoA thiolase trifunctional protein beta subunit, involved in fatty acid beta-oxidation; variants are associated with trifunctional protein deficiency, sudden infant death syndrome and liver failure |
| SW:LYAG_HUMAN | GAA           | 18 | 2  | 1.94 | 0.01 | SW:LYAG_HUMAN P10253 homo sapiens (human). lysosomal alpha-glucosidase precursor (ec 3.2.1.20) (acid maltase). 5/2000 [MASS=105338]/Acid alpha-glucosidase, lysosomal alpha-glucosidase that hydrolyzes alpha(1->4) and alpha(1->6) linkages in glycogen during glycogen catabolism; heritable deficiency causes glycogenosis type II or Pompe disease                                                                                                                           |
| SW:COX1_HUMAN | MTCO1         | 18 | 1  | 1.97 | 0.00 | SW:COX1_HUMAN P00395 homo sapiens (human). cytochrome c oxidase polypeptide i (ec 1.9.3.1). 5/2000 [MASS=57041]/Mitochondrial cytochrome c oxidase subunit I, a subunit of complex IV of the mitochondrial respiratory chain; mutations in the corresponding gene may be associated with mitochondrial diseases and acquired idiopathic sideroblastic anemia                                                                                                                     |



|               |         |    |    |      |      |                                                                                                                                                                                                                                                                                                                                                                                                                                                                          |
|---------------|---------|----|----|------|------|--------------------------------------------------------------------------------------------------------------------------------------------------------------------------------------------------------------------------------------------------------------------------------------------------------------------------------------------------------------------------------------------------------------------------------------------------------------------------|
| SW:ECHA_HUMAN | HADHA   | 18 | 13 | 1.97 | 0.65 | SW:ECHA_HUMAN P40939 homo sapiens (human). mitochondrial trifunctional enzyme alpha subunit precursor (tp-alpha) [includes: long-chain enoyl-coa hydratase (ec 4.2.1.17); long chain 3-hydroxyacyl-coa deh [MASS=82960]/Mitochondrial long-chain enoyl-CoA hydratase/3-hydroxyacyl-CoA dehydrogenase/3-ketoacyl-CoA thiolase alpha subunit, involved in fatty acid beta-oxidation, mutations are associated with trifunctional protein deficiency and Reye-like syndrome |
| SW:ETFB_HUMAN | ETFB    | 18 | 2  | 1.99 | 0.48 | SW:ETFB_HUMAN P38117 homo sapiens (human). electron transfer flavoprotein beta-subunit (beta-efb). 5/2000 [MASS=27844]/Electron transfer flavoprotein beta subunit, shuttles electrons between primary flavoprotein dehydrogenases involved in mitochondrial fatty acid metabolism and ubiquinone oxidoreductase; genetic variants are associated with type II glutaric acidemia                                                                                         |
| PIR2:B53737   | SLC25A3 | 18 | 21 | 2.02 | 0.42 | PIR2:B53737 phosphate carrier protein precursor, mitochondrial, splice form B - human [MASS=39959]/Mitochondrial phosphate carrier (solute carrier family 25 member 3), catalyzes the transport of phosphate from the cytoplasm to the mitochondrial matrix for ATP synthesis during oxidative phosphorylation                                                                                                                                                           |
| SW:IDHP_HUMAN | IDH2    | 18 | 7  | 2.04 | 0.65 | SW:IDHP_HUMAN P48735 homo sapiens (human). isocitrate dehydrogenase [nadh], mitochondrial precursor (ec 1.1.1.42) (oxalosuccinate decarboxylase) (idh) (nadh+-specific icdh) (idp) (id-m). 2/1996 [MASS=50948]/Isocitrate dehydrogenase 2 (NADP+) mitochondrial, catalyzes the oxidative decarboxylation of isocitrate to form alpha-ketoglutarate                                                                                                                       |
| SW:CY1_HUMAN  | CYC1    | 18 | 2  | 2.10 | 0.00 | SW:CY1_HUMAN P08574 homo sapiens (human). cytochrome c1, heme protein precursor. 7/1999 [MASS=35390]/Cytochrome c1, a member of the cytochrome bc1 complex                                                                                                                                                                                                                                                                                                               |
| SW:NUPM_HUMAN | NDUFA8  | 18 | 5  | 2.10 | 0.44 | SW:NUPM_HUMAN P51970 homo sapiens (human). nadh-ubiquinone oxidoreductase 19 kda subunit (ec 1.6.5.3) (ec 1.6.99.3) (complex i-19kd) (ci-19kd) (complex i-pgiv) (ci-pgiv). 5/2000 [MASS=19974]/NADH dehydrogenase ubiquinone 1 alpha subcomplex 8 (19 kDa), a subunit of NADH-ubiquinone oxidoreductase (complex I), a multiprotein complex that transports electrons from NADH to ubiquinone                                                                            |
| SW:KC2B_HUMAN | CSNK2B  | 18 | 2  | 2.11 | 0.18 | SW:KC2B_HUMAN P13862 homo sapiens (human), mus musculus (mouse), rattus norvegicus (rat), bos taurus (bovine), sus scrofa (pig), oryctolagus cuniculus (rabbit), and gallus gallus (chicken). casein kinase [MASS=24942]/Casein kinase II beta subunit, regulatory subunit of casein kinase II (CK2), confers stability and specificity to CK2 catalytic subunits, may mediate formation of the tetrameric CK2 complex, and may be involved in heat stress response      |
| SW:ATPG_HUMAN | ATP5C1  | 18 | 3  | 2.15 | 0.32 | SW:ATPG_HUMAN P36542 homo sapiens (human). atp synthase gamma chain, mitochondrial precursor (ec 3.6.1.34). 5/2000 [MASS=32996]/ATP synthase H+ transporting mitochondrial F1 complex gamma 1, putative component of multisubunit enzyme that synthesizes ATP during oxidative phosphorylation, exists in tissue-specific alternative forms that are spliced in response to acidic conditions                                                                            |
| SW:NUBM_HUMAN | NDUFV1  | 18 | 7  | 2.18 | 0.99 | SW:NUBM_HUMAN P49821 homo sapiens (human). nadh-ubiquinone oxidoreductase 51 kda subunit precursor (ec 1.6.5.3) (ec 1.6.99.3) (complex i-51kd) (ci-51kd). 5/2000 [MASS=50956]/NADH dehydrogenase ubiquinone flavoprotein 1 (51 kDa), a subunit of NADH-ubiquinone oxidoreductase (Complex I); genetic variants are associated with mitochondrial complex I deficiency, leukodystrophy, and myoclonic epilepsy                                                            |
| SW:UCR1_HUMAN | UQCRC1  | 18 | 8  | 2.24 | 0.43 | SW:UCR1_HUMAN P31930 homo sapiens (human). ubiquinol-cytochrome c reductase complex core protein i precursor (ec 1.10.2.2). 7/1999 [MASS=52619]/Ubiquinol-cytochrome c reductase core protein I, a subunit of the ubiquinol-cytochrome c oxidoreductase component of the mitochondrial respiratory chain, may function as an electron transporter in aerobic respiration and oxidative phosphorylation                                                                   |
| SW:DHSB_HUMAN | SDHB    | 18 | 1  | 2.24 | 0.00 | SW:DHSB_HUMAN P21912 homo sapiens (human). succinate dehydrogenase [ubiquinone] iron-sulfur protein, mitochondrial precursor (ec 1.3.5.1) (ip) (ip subunit of complex ii). 5/2000 [MASS=31629]/Succinate dehydrogenase complex iron sulfur subunit B, part of an enzyme complex that transports electrons from succinate to ubiquinone in the TCA cycle and aerobic respiratory chain, may be involved in familial pheochromocytoma                                      |
| SW:NB8M_HUMAN | NDUFB7  | 18 | 2  | 2.27 | 0.65 | SW:NB8M_HUMAN P17568 homo sapiens (human). nadh-ubiquinone oxidoreductase b18 subunit (ec 1.6.5.3) (ec 1.6.99.3) (complex i-b18) (ci-b18) (cell adhesion protein sqm1). 7/1998 [MASS=15648]/Subunit of the NADH-ubiquinone oxidoreductase (complex I), a multiprotein complex that transports electrons from NADH to ubiquinone, functions as a cell adhesion molecule with a role in metastasis, may have a role in drug transport                                      |
| SW:MDHM_HUMAN | MDH2    | 18 | 27 | 2.29 | 1.04 | SW:MDHM_HUMAN P40926 homo sapiens (human). malate dehydrogenase, mitochondrial precursor (ec 1.1.1.37). 5/2000 [MASS=35531]/Mitochondrial malate dehydrogenase, part of the malate-aspartate shuttle where it putatively catalyzes the oxidation of malate to oxaloacetate                                                                                                                                                                                               |
| SW:UCRH_HUMAN | UQCRH   | 18 | 3  | 2.36 | 0.26 | SW:UCRH_HUMAN P07919 homo sapiens (human). ubiquinol-cytochrome c reductase complex 11 kda protein precursor (ec 1.10.2.2) (mitochondrial hinge protein) (cytochrome c1, nonheme 11 kda protein) (complex [MASS=10755]/Ubiquinol-cytochrome c reductase hinge protein, hinges cytochrome c with cytochrome c1 in the mitochondrial respiratory chain, may function to accelerate apoptosis by enhancing cytochrome c release from the mitochondria                       |
| SW:ETFA_HUMAN | ETFA    | 18 | 1  | 2.36 | 0.00 | SW:ETFA_HUMAN P13804 homo sapiens (human). electron transfer flavoprotein alpha-subunit precursor (alpha-efb). 5/2000 [MASS=35080]/Electron transfer flavoprotein alpha subunit, shuttles electrons between flavoprotein dehydrogenases of mitochondrial fatty acid metabolism and ubiquinone oxidoreductase, deficiency associated with Type II glutaric aciduria                                                                                                       |
| SW:ATPA_HUMAN | ATP5A1  | 18 | 8  | 2.38 | 0.42 | SW:ATPA_HUMAN P25705 homo sapiens (human). atp synthase alpha chain, mitochondrial precursor (ec 3.6.1.34). 12/1998 [MASS=59751]/ATP synthase H+ transporting mitochondrial F1 complex alpha subunit isoform 1 cardiac muscle, part of the synthase enzymatic complex that catalyzes the synthesis of ATP during oxidative phosphorylation                                                                                                                               |

|                                          |         |    |    |      |      |                                                                                                                                                                                                                                                                                                                                                                                                                                                                   |
|------------------------------------------|---------|----|----|------|------|-------------------------------------------------------------------------------------------------------------------------------------------------------------------------------------------------------------------------------------------------------------------------------------------------------------------------------------------------------------------------------------------------------------------------------------------------------------------|
| SW:UCR2_HUMAN                            | UQCRC2  | 18 | 1  | 2.42 | 0.00 | SW:UCR2_HUMAN P22695 homo sapiens (human). ubiquinol-cytochrome c reductase complex core protein 2 precursor (ec 1.10.2.2) (complex iii subunit ii). 7/1999 [MASS=48470]/Ubiquinol-cytochrome c reductase core protein II, a putative ubiquinol-cytochrome c reductase subunit of the mitochondrial cytochrome bc1 complex, likely to play a role in oxidative phosphorylation, may be involved in aerobic respiration                                            |
| SW:THIL_HUMAN                            | ACAT1   | 18 | 2  | 2.44 | 0.44 | SW:THIL_HUMAN P24752 homo sapiens (human). acetyl-coa acetyltransferase, mitochondrial precursor (ec 2.3.1.9) (acetoacetyl-coa thiolase) (t2). 7/1999 [MASS=45200]/Acetyl-Coenzyme A acetyltransferase 1 (mitochondrial acetoacetyl-coenzyme A thiolase); mutations in the corresponding gene are associated with 3-ketothiolase deficiency                                                                                                                       |
| SW:UCRI_HUMAN                            | UQCRC1  | 18 | 4  | 2.45 | 0.39 | SW:UCRI_HUMAN P47985 homo sapiens (human). ubiquinol-cytochrome c reductase iron-sulfur subunit, mitochondrial precursor (ec 1.10.2.2) (rieske iron-sulfur protein) (risp). 7/1999 [MASS=29652]/Ubiquinol-cytochrome c reductase Rieske iron-sulfur polypeptide 1, a subunit of cytochrome bc1 complex, which transfers electron from ubiquinol to cytochrome c, located in the mitochondrion; deficient mitochondrial uptake may cause mitochondrial myopathy    |
| SW:PPCM_HUMAN                            | PCK2    | 18 | 6  | 2.45 | 1.09 | SW:PPCM_HUMAN Q16822 homo sapiens (human). phosphoenolpyruvate carboxykinase, mitochondrial precursor [gtp] (ec 4.1.1.32) (phosphoenolpyruvate carboxylase) (pepck-m). 7/1999 [MASS=70637]/Phosphoenolpyruvate carboxykinase 2, catalyzes the formation of phosphoenolpyruvate by decarboxylation of oxaloacetate, rate-limiting step of gluconeogenesis                                                                                                          |
| SW:DHSA_HUMAN                            | SDHA    | 18 | 5  | 2.48 | 0.32 | SW:DHSA_HUMAN P31040 homo sapiens (human). succinate dehydrogenase [ubiquinone] flavoprotein subunit, mitochondrial precursor (ec 1.3.5.1) (fp) (flavoprotein subunit of complex ii). 5/2000 [MASS=72692]/Succinate dehydrogenase complex subunit A (flavoprotein), transports electrons from succinate to ubiquinone in the TCA cycle and respiratory chain; gene mutation is associated with Leigh syndrome, which is a complex II respiratory chain deficiency |
| SW:ADT2_HUMAN                            | SLC25A5 | 18 | 8  | 2.53 | 1.17 | SW:ADT2_HUMAN P05141 homo sapiens (human). adp,atp carrier protein, fibroblast isoform (adp/atp translocase 2) (adenine nucleotide translocator 2) (ant 2). 7/1999 [MASS=32895]/Solute carrier family 25 member 5 (adenine nucleotide translocator 2), may mediate the exchange of ADP and ATP between the cytosol and mitochondria, expression is altered in dilated cardiomyopathy                                                                              |
| SW:ADT3_HUMAN                            | SLC25A6 | 18 | 1  | 2.57 | 0.00 | SW:ADT3_HUMAN P12236 homo sapiens (human). adp,atp carrier protein, liver isoform t2 (adp/atp translocase 3) (adenine nucleotide translocator 3) (ant 3). 11/1995 [MASS=32866]/Solute carrier family 25 member 6 (adenine nucleotide translocator), member of the ADP/ATP translocase family                                                                                                                                                                      |
| SW:ATPQ_HUMAN                            | ATP5H   | 18 | 3  | 2.67 | 0.53 | SW:ATPQ_HUMAN O75947 homo sapiens (human). atp synthase d chain, mitochondrial (ec 3.6.1.34). 5/2000 [MASS=18360]/Protein with high similarity to subunit d of the mitochondrial H(+)-ATP synthase (rat Atp5jd), which is part of a multisubunit enzyme that catalyzes the synthesis of ATP during oxidative phosphorylation                                                                                                                                      |
| SW:NIPM_HUMAN                            | NDUFS5  | 18 | 2  | 2.69 | 0.02 | SW:NIPM_HUMAN O43920 homo sapiens (human). nadh-ubiquinone oxidoreductase 15 kda subunit (ec 1.6.5.3) (ec 1.6.99.3) (complex i-15 kda) (ci-15 kda). 7/1999 [MASS=12386]/NADH dehydrogenase Fe-S protein 5 (15kD) (NADH-coenzyme Q reductase), putative subunit of NADH-ubiquinone oxidoreductase (complex I), a multiprotein complex that transports electrons from NADH to ubiquinone in the mitochondrial respiratory chain                                     |
| SW:COXG_HUMAN                            | COX6B   | 18 | 6  | 2.77 | 1.08 | SW:COXG_HUMAN P14854 homo sapiens (human). cytochrome c oxidase polypeptide vib (ec 1.9.3.1) (aed). 11/1997 [MASS=10061]/Cytochrome c oxidase subunit VIb, a putative subunit of cytochrome C oxidase, which couples reduction of oxygen with proton translocation during oxidative phosphorylation                                                                                                                                                               |
| <b>Lipid, Fat, and Sterol Metabolism</b> |         |    |    |      |      |                                                                                                                                                                                                                                                                                                                                                                                                                                                                   |
| SW:FDFT_HUMAN                            | FDFT1   | 19 | 1  | 0.22 | 0.00 | SW:FDFT_HUMAN P37268 homo sapiens (human). farnesyl-diphosphate farnesyltransferase (ec 2.5.1.21) (squalene synthetase) (sqs) (ss) (fpp:fpp farnesyltransferase). 10/1996 [MASS=48115]/Squalene synthase (farnesyl-diphosphate farnesyltransferase 1), catalyzes the conversion of farnesyl diphosphate to squalene in cholesterol biosynthesis, may be a potential target for cholesterol lowering therapy                                                       |
| GPN:Y14436_1                             | PPAP2A  | 19 | 2  | 0.27 | 0.02 | type-2 phosphatidic acid phosphatase alpha-1 /Phosphatidic acid phosphatase type 2a, catalyzes the dephosphorylation of various lipid phosphates, regulates the level of lipid phosphates which are involved in signal transduction                                                                                                                                                                                                                               |
| GP:D89053_1                              | FACL3   | 19 | 13 | 0.29 | 0.13 | fatty-acid-Coenzyme A ligase, long-chain 3 /Fatty acid Coenzyme A ligase long chain 3, a putative long-chain fatty-acyl-CoA synthetase that may function in lipid synthesis and fatty acid degradation                                                                                                                                                                                                                                                            |
| SW:ACDV_HUMAN                            | ACADVL  | 19 | 1  | 0.32 | 0.00 | SW:ACDV_HUMAN P49748 homo sapiens (human). acyl-coa dehydrogenase, very-long-chain specific, mitochondrial precursor (ec 1.3.99.-) (vicad). 5/2000 [MASS=70390]/Very long chain acyl-coenzyme A dehydrogenase, oxidizes straight chain acyl-CoAs in the initial step of fatty acid beta-oxidation, severe deficiency results in infant cardiomyopathy with high mortality, mild deficiency results in hypoketotic hypoglycemia                                    |
| SW:FAS_HUMAN                             | FASN    | 19 | 90 | 0.34 | 0.15 | SW:FAS_HUMAN P49327 homo sapiens (human). fatty acid synthase (ec 2.3.1.85) [includes: ec 2.3.1.38; ec 2.3.1.39; ec 2.3.1.41; ec 1.1.1.100; ec 4.2.1.61; ec 1.3.1.10; ec 3.1.2.14]. 7/1999 [MASS=273102]/Fatty acid synthase, multifunctional enzyme that synthesizes fatty acids from dietary proteins and carbohydrates; increased expression is associated with tumor growth and development, expression may serve as a prognostic maker for breast cancer     |
| SW:ERG7_HUMAN                            | LSS     | 19 | 1  | 0.37 | 0.00 | SW:ERG7_HUMAN P48449 homo sapiens (human). lanosterol synthase (ec 5.4.99.7) (oxidosqualene--lanosterol cyclase) (2,3-epoxysqualene--lanosterol cyclase) (osc). 5/2000 [MASS=83309]/Lanosterol synthase, catalyzes the cyclization of (S)-2,3-oxidosqualene forming lanosterol in sterol biosynthesis                                                                                                                                                             |
| SW:COA1_HUMAN                            | ACACA   | 19 | 2  | 0.41 | 0.05 | SW:COA1_HUMAN Q13085 homo sapiens (human). acetyl-coa carboxylase 1 (ec 6.4.1.2) (acc-alpha) [includes: biotin carboxylase (ec 6.3.4.14)]. 7/1999 [MASS=265040]/Acetyl-Coenzyme A carboxylase alpha, catalyzes the rate-limiting step in long-chain fatty acid biogenesis; deficiency leads to defects in fatty acid synthesis                                                                                                                                    |

|               |         |    |    |      |      |                                                                                                                                                                                                                                                                                                                                                                                                                                                                                     |
|---------------|---------|----|----|------|------|-------------------------------------------------------------------------------------------------------------------------------------------------------------------------------------------------------------------------------------------------------------------------------------------------------------------------------------------------------------------------------------------------------------------------------------------------------------------------------------|
| SW:ACLY_HUMAN | ACLY    | 19 | 6  | 0.44 | 0.09 | SW:ACLY_HUMAN P53396 homo sapiens (human). atp-citrate (pro-s-)-lyase (ec 4.1.3.8) (citrate cleavage enzyme). 10/1996 [MASS=121420]/ATP citrate lyase, catalyzes the formation of acetyl-CoA and oxaloacetate from citrate and CoA with the concomitant hydrolysis of ATP to ADP and phosphate, involved in cholesterol and fatty acid synthesis, nutritionally regulated                                                                                                           |
| SW:LDLR_HUMAN | LDLR    | 19 | 3  | 0.55 | 0.04 | SW:LDLR_HUMAN P01130 homo sapiens (human). low-density lipoprotein receptor precursor (ldl receptor). 5/2000 [MASS=95376]/Low density lipoprotein receptor, mediates uptake of low density lipoproteins, involved in lipid metabolism; gene variations are associated with familial hypercholesterolemia, hypertension, atherosclerosis, and coronary artery disease                                                                                                                |
| SW:NSDL_HUMAN | NSDHL   | 19 | 6  | 0.58 | 0.16 | SW:NSDL_HUMAN Q15738 homo sapiens (human). nad(p)-dependent steroid dehydrogenase-like protein (h105e3 protein). 5/2000 [MASS=41900]/NAD(P)H steroid dehydrogenase-like protein, a 3 beta-hydroxysteroid dehydrogenase that functions in cholesterol biosynthesis; mutations in the corresponding gene cause CHILD syndrome                                                                                                                                                         |
| SW:CP51_HUMAN | CYP51   | 19 | 3  | 0.71 | 0.04 | SW:CP51_HUMAN Q16850 homo sapiens (human). cytochrome p450 51 (ec 1.14.14.1) (cyp1) (p450i1) (sterol 14-alpha demethylase) (lanosterol 14-alpha demethylase) (ldm) (p450-14dm). 5/2000 [MASS=56806]/Lanosterol 14-alpha-demethylase (sterol 14alpha-demethylase); cytochrome P450 enzyme involved in sterol biosynthesis                                                                                                                                                            |
| SW:LCFA_HUMAN | FACL1   | 19 | 14 | 0.81 | 0.13 | SW:LCFA_HUMAN P41215 homo sapiens (human). long-chain-fatty-acid--coa ligase 1 (ec 6.2.1.3) (long-chain acyl-coa synthetase 1) (lacs 1) (palmitoyl-coa ligase). 10/1996 [MASS=78348]/Long chain fatty acid-Coenzyme A ligase (palmitoyl-CoA ligase), a member of the long chain acyl-CoA synthetase family required for lipid synthesis and fatty acid degradation                                                                                                                  |
| SW:LCB2_HUMAN | SPTLC2  | 19 | 1  | 0.82 | 0.00 | SW:LCB2_HUMAN O15270 homo sapiens (human). serine palmitoyltransferase 2 (ec 2.3.1.50) (long chain base biosynthesis protein 2) (lcb 2) (serine-palmitoyl-coa transferase 2) (spt 2) (kiaa0526). 5/2000 [MASS=62924]/Serine palmitoyltransferase long chain base subunit 2, member of the aminolevulinate synthase superfamily, catalyzes the first step in ceramide formation, involved in epidermal cell response to UV exposure and in leukemia cell ectopside-induced apoptosis |
| SW:DRS1_HUMAN | PECI    | 19 | 9  | 0.83 | 0.22 | SW:DRS1_HUMAN O75521 homo sapiens (human). dbi-related protein 1 (drs-1). 5/2000 [MASS=40151]/Peroxisomal D3,D2 enoyl-CoA isomerase, catalyzes the isomerization of 3-cis-octenoyl-CoA to 2-trans-octenoyl-CoAm, a step in the beta oxidation of fatty acids in peroxisomes                                                                                                                                                                                                         |
| SWN:P23_HUMAN | p23     | 19 | 2  | 0.85 | 0.01 | SWN:P23_HUMAN Q15185 homo sapiens (human). telomerase-binding protein p23 (hsp90 co-chaperone) (progesterone receptor complex p23). 8/2001 [MASS=18697]/Inactive progesterone receptor (23kD), cochaperone with prostaglandin E synthase activity that is a component of the unstimulated progesterone receptor complex and that enhances receptor complex formation through interactions with Hsp90 (HSPCA)                                                                        |
| SW:KIME_HUMAN | MVK     | 19 | 1  | 0.91 | 0.00 | SW:KIME_HUMAN Q03426 homo sapiens (human). mevalonate kinase (ec 2.7.1.36) (mk). 7/1999 [MASS=42451]/Mevalonate kinase (mevalonic aciduria), a peroxisomal enzyme involved in isoprenoid and cholesterol biosynthesis; mutations in the corresponding gene cause mevalonic aciduria, hyperimmunoglobulinemia D and periodic fever syndrome                                                                                                                                          |
| GP:U66669_1   | HIBCH   | 19 | 1  | 0.91 | 0.00 | GP:U66669_1 Homo sapiens 3-hydroxyisobutyryl-coenzyme A hydrolase mRNA, complete cds. [MASS=42908]/Beta-hydroxyisobutyryl-coenzyme A hydrolase, enzyme that hydrolyzes 3-hydroxyisobutyryl CoA, an intermediate of valine catabolism                                                                                                                                                                                                                                                |
| SW:ASAH_HUMAN | ASAH    | 19 | 1  | 0.99 | 0.00 | SW:ASAH_HUMAN Q13510 homo sapiens (human). acid ceramidase precursor (ec 3.5.1.23) (acylsphingosine deacylase) (n-acylsphingosine amidohydrolase) (ac) (putative 32 kda heart protein) (php32). 5/2000 [MASS=44650]/N-acylsphingosine amidohydrolase (acid ceramidase), catalyzes hydrolysis of ceramide to sphingosine and free fatty acid, inhibits apoptosis, upregulated in prostate cancer, deficiency is associated with Farber disease                                       |
| GP:AF126782_1 | RETSDR1 | 19 | 8  | 1.06 | 0.21 | GP:AF126782_1 Homo sapiens retinal short-chain dehydrogenase/reductase retSDR4 mRNA, complete cds. [MASS=32268]/Short-chain dehydrogenase-reductase 1, catalyzes the NADPH-dependent reduction of all-trans-retinal to retinol, may play a role in visual system phototransduction; the corresponding gene is deleted in many neuroblastoma cell lines with MYCN amplification                                                                                                      |
| SW:OXYB_HUMAN | OSBP    | 19 | 3  | 1.08 | 0.26 | SW:OXYB_HUMAN P22059 homo sapiens (human). oxysterol-binding protein. 11/1995 [MASS=89421]/Oxysterol binding protein, member of a family of intracellular lipid receptors, contains a pleckstrin domain and an oxysterol binding domain, binds oxysterols, may play a role in the regulation of cholesterol metabolism and oxysterol-induced cell death                                                                                                                             |
| SW:CPT2_HUMAN | CPT2    | 19 | 1  | 1.08 | 0.00 | SW:CPT2_HUMAN P23786 homo sapiens (human). carnitine o-palmitoyltransferase ii, mitochondrial precursor (ec 2.3.1.21) (cpt ii). 5/2000 [MASS=73777]/Carnitine palmitoyltransferase II, a mitochondrial long-chain fatty acid oxidation enzyme; mutations are associated with a lipid metabolism disorder that includes recurrent myopathy with progressive rhabdomyolysis, muscle weakness and myoglobinuria                                                                        |
| SW:FAAH_HUMAN | FAAH    | 19 | 3  | 1.10 | 0.22 | SW:FAAH_HUMAN O00519 homo sapiens (human). fatty-acid amide hydrolase (ec 3.1.-.-) (oleamide hydrolase). 5/2000 [MASS=63038]/Fatty acid amide hydrolase, degrades neuromodulatory fatty acid amides, including anandamide, predicted to have a role in a wide variety of physiologic effects such as voluntary movement, pain, sleep, and fertility, may have a role in Parkinson disease                                                                                           |
| SW:HBP_HUMAN  | HDLBP   | 19 | 3  | 1.11 | 0.27 | SW:HBP_HUMAN Q00341 homo sapiens (human). high density lipoprotein binding protein (hdl-binding protein). 12/1998 [MASS=141440]/High density lipoprotein binding protein, binds and inhibits cleavage of the 3' UTR of vitellogenin mRNA, binds and promotes nuclear export of tRNA, binds high density lipoproteins and may have roles in cholesterol metabolism and atherogenesis                                                                                                 |

|                 |         |    |    |      |      |                                                                                                                                                                                                                                                                                                                                                                                                                                                                              |
|-----------------|---------|----|----|------|------|------------------------------------------------------------------------------------------------------------------------------------------------------------------------------------------------------------------------------------------------------------------------------------------------------------------------------------------------------------------------------------------------------------------------------------------------------------------------------|
| SW: NPC1_HUMAN  | NPC1    | 19 | 1  | 1.16 | 0.00 | SW: NPC1_HUMAN O15118 homo sapiens (human). niemann-pick c1 protein precursor. 5/2000 [MASS=142149]/Niemann-Pick disease type C1, a lysosomal sterol transporter involved in cholesterol metabolism; mutation of the corresponding gene causes Niemann-Pick type C1 disease and mutation of mouse Npc1 causes a disease like Niemann-Pick type C1 disease                                                                                                                    |
| SW: PEBP_HUMAN  | PBP     | 19 | 2  | 1.17 | 0.15 | SW: PEBP_HUMAN P30086 homo sapiens (human). phosphatidylethanolamine-binding protein (pebp) (neuropolypeptide h3). 7/1999 [MASS=20926]/Phosphatidylethanolamine-binding protein, binds GTP, may regulate cAMP accumulation, enhance acetylcholine synthesis, and play a role in organizing phospholipids in the myelin sheath                                                                                                                                                |
| SW: GLCM_HUMAN  | GBA     | 19 | 2  | 1.21 | 0.09 | SW: GLCM_HUMAN P04062 homo sapiens (human). glucosylceramidase precursor (ec 3.2.1.45) (beta-glucocerebrosidase) (acid beta-glucosidase) (d-glucosyl-n-acylsphingosine glucosylase) (alglucerase) (imigl [MASS=59697]/Acid beta glucosidase (beta-glucocerebrosidase), a lysosomal membrane protein that hydrolyzes glucosylceramide and glucosylsphingosine, may play a role in epidermal differentiation; mutations in the corresponding gene cause Gaucher's disease      |
| SW: PI52_HUMAN  | PIP5K2A | 19 | 1  | 1.24 | 0.00 | SW: PI52_HUMAN P48426 homo sapiens (human). phosphatidylinositol-4-phosphate 5-kinase type ii alpha (ec 2.7.1.68) (pip5kii-alpha) (1-phosphatidylinositol-4-phosphate kinase) (ptdins(4)p-5-kinase b isoform [MASS=46193]/Phosphatidylinositol-4-phosphate 5-kinase type II, alpha, a member of a family of kinases responsible for the synthesis of PtdIns(4,5)P2                                                                                                           |
| GP: AF034544_1  | DHCR7   | 19 | 6  | 1.25 | 0.30 | GP: AF034544_1 Homo sapiens delta7-sterol reductase mRNA, complete cds; D7SR. [MASS=54516]/7-dehydrocholesterol reductase, catalyzes the reduction of the C7-C8 (delta 7) double bond of 7-dehydrocholesterol in the last step of cholesterol biosynthesis; mutations in the corresponding gene are associated with Smith-Lemli-Opitz                                                                                                                                        |
| SW: THIK_HUMAN  | ACAA1   | 19 | 15 | 1.26 | 0.25 | SW: THIK_HUMAN P09110 homo sapiens (human). 3-ketoacyl-coa thiolase, peroxisomal precursor (ec 2.3.1.16) (beta-ketothiolase) (acetyl-coa acyltransferase) (peroxisomal 3-oxoacyl-coa thiolase). 7/1999 [MASS=44292]/Peroxisomal 3-oxoacyl-coenzyme A thiolase (peroxisomal 3-ketoacyl-Coenzyme A thiolase), functions in peroxisomal beta-oxidation of fatty acids, deficiency is associated with rhizomelic chondrodysplasia punctata (RCDP)                                |
| SW: CPT1_HUMAN  | CPT1A   | 19 | 1  | 1.30 | 0.00 | SW: CPT1_HUMAN P50416 homo sapiens (human). carnitine o-palmitoyltransferase i, mitochondrial liver isoform (ec 2.3.1.21) (cpt i) (cpti-l). 7/1999 [MASS=88429]/Liver carnitine palmitoyltransferase I, enzyme of long-chain fatty acid beta-oxidation pathway; mutations in the corresponding gene are associated with carnitine palmitoyltransferase I deficiency                                                                                                          |
| SW: D3D2_HUMAN  | DCI     | 19 | 3  | 1.31 | 0.20 | SW: D3D2_HUMAN P42126 homo sapiens (human). 3,2-trans-enoyl-coa isomerase, mitochondrial precursor (ec 5.3.3.8) (dodecenoyl-coa delta-isomerase). 7/1999 [MASS=32816]/Dodecenoyl-Coenzyme A delta isomerase (3,2 trans-enoyl-Coenzyme A isomerase), catalyzes the isomerization of 3-cis and 3-trans enoyl CoA esters to 2-trans enoyl CoA esters, functions in mitochondrial beta-oxidation of unsaturated fatty acids                                                      |
| SW: SAP_HUMAN   | PSAP    | 19 | 14 | 1.31 | 0.91 | SW: SAP_HUMAN P07602 h proactivator polypeptide precursor [contains: saposin a (protein a); saposin b (sphingolipid activator protein 1) (sap-1) (dispersin) (sulfatide/gm1 activator); saposin c (co-beta- [MASS=58113]/Prosaposin, precursor of saposins A, B, C, and D which transport gangliosides and activate sphingolipid hydrolysis, stimulates neurite growth and inhibits apoptosis; variants are associated with metachromatic leukodystrophy and Gaucher disease |
| GP: AB037108_1  | TPRA40  | 19 | 2  | 1.36 | 0.09 | GP: AB037108_1 Homo sapiens mRNA for seven transmembrane domain orphan receptor, complete cds; seven transmembrane domain containing protein. [MASS=41090]/Protein with strong similarity to murine Tpra40, which is a seven transmembrane domain protein expressed in 3T3 adipocytes, and that has elevated expression in epididymal fat of genetically diabetic and obese mice                                                                                             |
| SW: ECH1_HUMAN  | ECH1    | 19 | 28 | 1.36 | 0.24 | SW: ECH1_HUMAN Q13011 homo sapiens (human). delta3,5-delta2,4-dienoyl-coa isomerase precursor (ec 5.3.3.-). 7/1999 [MASS=35994]/Enoyl Coenzyme A hydratase 1 (peroxisomal), putative enzyme that may play a role in peroxisomal beta-oxidation                                                                                                                                                                                                                               |
| SW: SAP3_HUMAN  | GM2A    | 19 | 3  | 1.39 | 0.14 | SW: SAP3_HUMAN P17900 homo sapiens (human). ganglioside gm2 activator precursor (cerebroside sulfate activator protein) (shingolipid activator protein 3) (sap-3). 7/1999 [MASS=20822]/GM2 ganglioside activator protein, binds glycolipids and is a cofactor for GM2 ganglioside hydrolysis by beta hexosaminidase A, activates phospholipase D, and inhibits platelet activating factor; mutation of the gene causes GM2-gangliosidosis variant AB                         |
| GP: AF035959_1  | PPAP2C  | 19 | 1  | 1.42 | 0.00 | GP: AF035959_1 Homo sapiens type-2 phosphatidic acid phosphatase-gamma (PAP2-g) mRNA, complete cds; phosphatidate phosphohydrolase; phospholipid phosphatase. [MASS=32574]/Phosphatidic acid phosphatase 2c, hydrolyzes phospholipids, may play a role in signal transduction                                                                                                                                                                                                |
| SW: OCRL_HUMAN  | OCRL    | 19 | 2  | 1.42 | 1.00 | SW: OCRL_HUMAN Q01968 homo sapiens (human). lowe's oculocerebrorenal syndrome protein. 7/1998 [MASS=111485]/Oculocerebrorenal syndrome of Lowe, phosphatidylinositol-4,5-bisphosphate 5-phosphatase, may play a role in intracellular protein trafficking; mutation of the corresponding gene causes Lowe oculocerebrorenal syndrome                                                                                                                                         |
| GP: AB033078_1  | SGPL1   | 19 | 2  | 1.44 | 0.06 | GP: AB033078_1 Homo sapiens mRNA for KIAA1252 protein, partial cds; Start codon is not identified. [MASS=64962]/Protein with strong similarity to sphingosine phosphate lyase 1 (mouse Sgpl1), which is a member of the carbon-carbon lyase subclass of aldehyde-lyases that catalyzes cleavage of sphingosine phosphate and is involved in proliferative signal transduction                                                                                                |
| SWN: CNE3_HUMAN | CPN3    | 19 | 28 | 1.47 | 0.27 | SWN: CNE3_HUMAN O75131 homo sapiens (human). copine iii. 8/2001 [MASS=60131]/Copine III, a member of the copine family of phospholipid binding proteins, contains C2 and integrin A domains, may play a role in membrane trafficking, displays protein kinase activity, however, it does not contain a traditional kinase catalytic domain                                                                                                                                   |

|               |               |    |    |      |      |                                                                                                                                                                                                                                                                                                                                                                                                                                                                                                                                                                       |
|---------------|---------------|----|----|------|------|-----------------------------------------------------------------------------------------------------------------------------------------------------------------------------------------------------------------------------------------------------------------------------------------------------------------------------------------------------------------------------------------------------------------------------------------------------------------------------------------------------------------------------------------------------------------------|
| SW:NLTP_HUMAN | SCP2          | 19 | 2  | 1.50 | 0.06 | SW:NLTP_HUMAN P22307 homo sapiens (human). nonspecific lipid-transfer protein precursor (nsl-tp) (sterol carrier protein 2) (scp-2) (sterol carrier protein x) (scp-x) (scpx). 5/2000 [MASS=58994]/Sterol carrier protein 2, catalyzes the exchange of phospholipids between membranes, stimulates cholesterol metabolism and may regulate steroidogenesis; alternative form, SCPX, is a 3 oxoacyl CoA thiolase                                                                                                                                                       |
| SW:CAOP_HUMAN | ACOX1 or ACOX | 19 | 1  | 1.53 | 0.00 | SW:CAOP_HUMAN Q15067 homo sapiens (human). acyl-coenzyme a oxidase, peroxisomal (ec 1.3.3.6) (palmitoyl-coa oxidase) (aox). 11/1997 [MASS=74502]/Peroxisomal acyl-coenzyme A oxidase, catalyzes the first step in very long chain fatty acid beta-oxidation, desaturates acyl-CoA to 2-trans-enoyl-CoA and produces hydrogen peroxide                                                                                                                                                                                                                                 |
| SW:PKBS_HUMAN | BZRP          | 19 | 2  | 1.57 | 0.04 | SW:PKBS_HUMAN P30536 homo sapiens (human). peripheral-type benzodiazepine receptor (pbr) (pkbs) (mitochondrial benzodiazepine receptor). 6/1994 [MASS=18779]/Benzodiazepine receptor (peripheral), involved in steroid biosynthesis, cell proliferation, and may contribute to mitochondrial biogenesis and inhibit oxygen radical induced apoptosis; expression, nuclear location may correlate to breast tumor progression                                                                                                                                          |
| SW:PXF_HUMAN  | PXF           | 19 | 1  | 1.61 | 0.00 | SW:PXF_HUMAN P40855 homo sapiens (human). peroxisomal farnesylated protein (33 kda housekeeping protein). 12/1998 [MASS=32807]/Peroxisomal farnesylated protein, peroxisomal protein that binds several peroxisomal membrane proteins (PMP), involved in early stages of PMP import and peroxisomal biogenesis; deficiency is associated with Zellweger syndrome complementation group J                                                                                                                                                                              |
| SW:DHA4_HUMAN | ALDH3A2       | 19 | 2  | 1.62 | 0.67 | SW:DHA4_HUMAN P51648 homo sapiens (human). fatty aldehyde dehydrogenase (ec 1.2.1.3) (aldehyde dehydrogenase, microsomal) (aldh class 3). 7/1999 [MASS=54848]/Aldehyde dehydrogenase 3 family member A2, catalyzes the oxidation of long chain fatty aldehydes and leukotrienes; mutation of the corresponding gene causes Sjogren Larsson syndrome, a disorder marked by mental retardation, spasticity, and ichthyosis                                                                                                                                              |
| SW:HCD2_HUMAN | HADH2         | 19 | 4  | 1.67 | 0.12 | SW:HCD2_HUMAN Q99714 homo sapiens (human). 3-hydroxyacyl-coa dehydrogenase type ii (ec 1.1.1.35) (endoplasmic reticulum-associated amyloid beta-peptide binding protein) (short-chain type dehydrogenase/ [MASS=26923]/Hydroxyacyl-Coenzyme A dehydrogenase (type II), catalyzes the oxidation of steroids and alcohols, binds amyloid-beta protein; overexpressed and mediates neurotoxicity of Alzheimer's disease, mutation in the corresponding gene causes hyperinsulinism                                                                                       |
| SW:DHB4_HUMAN | HSD17B4       | 19 | 12 | 1.74 | 0.52 | SW:DHB4_HUMAN P51659 homo sapiens (human). estradiol 17 beta-dehydrogenase 4 (ec 1.1.1.62) (17-beta-hsd 4) (17-beta-hydroxysteroid dehydrogenase 4). 11/1997 [MASS=79686]/Type IV 17 beta-hydroxysteroid dehydrogenase, a peroxisomal multifunctional enzyme with estradiol 17 beta-dehydrogenase and D-3 hydroxyacyl CoA dehydratase activities, involved in steroid and bile acid metabolism                                                                                                                                                                        |
| SW:AGAL_HUMAN | GLA           | 19 | 1  | 1.80 | 0.00 | SW:BDH_HUMAN P06280 homo sapiens (human). alpha-galactosidase a precursor (ec 3.2.1.22) (melibiase) (alpha-d-galactoside galactohydrolase) (alpha-d-galactosidase a). 7/1998 [MASS=48767]/Alpha-galactosidase A (alpha-D-galactoside galactohydrolase), hydrolyzes glycosphingolipids to release alpha-D-galactosyl residues; mutation of the corresponding gene causes Fabry disease                                                                                                                                                                                 |
| SW:ADRO_HUMAN | FDXR          | 19 | 1  | 1.82 | 0.00 | SW:ADRO_HUMAN P22570 homo sapiens (human). nadph:adrenodoxin oxidoreductase precursor (ec 1.18.1.2) (adrenodoxin reductase) (ferredoxin-nadp(+)) reductase). 7/1999 [MASS=53809]/Ferredoxin reductase, mitochondrial flavoprotein that mediates electron transport from NADPH to cytochrome P450cc                                                                                                                                                                                                                                                                    |
| SW:ECHB_HUMAN | HADHB         | 19 | 4  | 1.87 | 0.07 | SW:ECHB_HUMAN P55084 homo sapiens (human). trifunctional enzyme beta subunit, mitochondrial precursor (tp-beta) [includes: 3-ketoacyl-coa thiolase (ec 2.3.1.16) (acetyl-coa acyltransferase) (beta-ketothi [MASS=51294]/3-hydroxyacyl-CoA dehydrogenase, 3-ketoacyl-CoA thiolase trifunctional protein beta subunit, involved in fatty acid beta-oxidation; variants are associated with trifunctional protein deficiency, sudden infant death syndrome and liver failure                                                                                            |
| SW:CNBP_HUMAN | ZNF9          | 19 | 2  | 1.87 | 0.27 | SW:CNBP_HUMAN P20694 homo sapiens (human), and rattus norvegicus (rat). cellular nucleic acid binding protein (cnbp). 11/1997 [MASS=19463]/Zinc-finger protein that binds to sterol regulatory element (SRE) and may function in sterol-mediated repression of genes encoding the low density lipoprotein receptor and enzymes of the cholesterol biosynthetic pathway                                                                                                                                                                                                |
| SW:MAOM_HUMAN | ME2           | 19 | 2  | 1.96 | 0.04 | SW:MAOM_HUMAN P23368 homo sapiens (human). nad-dependent malic enzyme, mitochondrial precursor (ec 1.1.1.38) (nad-me). 5/2000 [MASS=65444]/Malic enzyme 2, a NAD(+)-dependent mitochondrial form of malic enzyme, catalyzes the oxidative decarboxylation of malate to form pyruvate                                                                                                                                                                                                                                                                                  |
| SW:ECHA_HUMAN | HADHA         | 19 | 13 | 1.97 | 0.65 | SW:ECHA_HUMAN P40939 homo sapiens (human). mitochondrial trifunctional enzyme alpha subunit precursor (tp-alpha) [includes: long-chain enoyl-coa hydratase (ec 4.2.1.17); long chain 3-hydroxyacyl-coa deh [MASS=82960]/Mitochondrial long-chain enoyl-CoA hydratase/3-hydroxyacyl-CoA dehydrogenase/3-ketoacyl-CoA thiolase alpha subunit, involved in fatty acid beta-oxidation, mutations are associated with trifunctional protein deficiency and Reye-like syndrome                                                                                              |
| SW:ETFB_HUMAN | ETFB          | 19 | 2  | 1.99 | 0.48 | SW:ETFB_HUMAN P38117 homo sapiens (human). electron transfer flavoprotein beta-subunit (beta-etf). 5/2000 [MASS=27844]/Electron transfer flavoprotein beta subunit, shuttles electrons between primary flavoprotein dehydrogenases involved in mitochondrial fatty acid metabolism and ubiquinone oxidoreductase; genetic variants are associated with type II glutaric acidemia                                                                                                                                                                                      |
| GP:AL023805_1 | PLCB4         | 19 | 6  | 2.00 | 0.24 | GP:AL023805_1 Human DNA sequence from clone RP4-811H13 on chromosome 20p12. Contains part of the PLCB4 gene for Phospholipase C beta 4, STSs, GSSs and a CpG island, complete sequence; combines with dJ1119D9.2.1 and .2 in Em:AL031652 to form isoforms 5 and 6; may a [MASS=61433]/1-phosphatidylinositol-4,5-bisphosphate phosphodiesterase beta 4/Phospholipase C beta 4, member of a G protein-regulated family of phospholipases that hydrolyze phosphatidylinositol 4,5-bisphosphate to the second messengers inositol 1,4,5-trisphosphate and diacylglycerol |

|                              |          |    |   |      |      |                                                                                                                                                                                                                                                                                                                                                                                                                                                                                  |
|------------------------------|----------|----|---|------|------|----------------------------------------------------------------------------------------------------------------------------------------------------------------------------------------------------------------------------------------------------------------------------------------------------------------------------------------------------------------------------------------------------------------------------------------------------------------------------------|
| SW:GST3_HUMAN                | MGST3    | 19 | 2 | 2.31 | 0.83 | SW:GST3_HUMAN O14880 homo sapiens (human). microsomal glutathione s-transferase 3 (ec 2.5.1.18) (microsomal gst-3) (microsomal gst-iii). 5/2000 [MASS=16516]/Microsomal glutathione S-transferase 3, a microsomal membrane protein that has glutathione-dependent transferase and peroxidase activities, member of a family that includes 5-lipoxygenase activating protein (ALOX5AP) and leukotriene-C4 synthase (LTC4S)                                                        |
| SW:ETFA_HUMAN                | ETFA     | 19 | 1 | 2.36 | 0.00 | SW:ETFA_HUMAN P13804 homo sapiens (human). electron transfer flavoprotein alpha-subunit precursor (alpha-etf). 5/2000 [MASS=35080]/Electron transfer flavoprotein alpha subunit, shuttles electrons between flavoprotein dehydrogenases of mitochondrial fatty acid metabolism and ubiquinone oxidoreductase, deficiency associated with Type II glutaricaciduria                                                                                                                |
| SW:MAZ_HUMAN                 | MAZ      | 19 | 1 | 2.37 | 0.00 | SW:MAZ_HUMAN P56270 homo sapiens (human). myc-associated zinc finger protein (mazi) (purine-binding transcription factor) (pur-1) (zif87). 7/1999 [MASS=48608]/MYC-associated zinc finger protein (purine-binding transcription factor), functions both as a positive and a negative regulator of gene expression and may also have roles in initiating and terminating transcription                                                                                            |
| SW:THIL_HUMAN                | ACAT1    | 19 | 2 | 2.44 | 0.44 | SW:THIL_HUMAN P24752 homo sapiens (human). acetyl-coa acetyltransferase, mitochondrial precursor (ec 2.3.1.9) (acetoacetyl-coa thiolase) (t2). 7/1999 [MASS=45200]/Acetyl-Coenzyme A acetyltransferase 1 (mitochondrial acetoacetyl-coenzyme A thiolase); mutations in the corresponding gene are associated with 3-ketothiolase deficiency                                                                                                                                      |
| GP:AF161397_1                | HPCL2    | 19 | 2 | 2.53 | 0.16 | GP:AF161397_1 Homo sapiens HSPC279 mRNA, partial cds. [MASS=64199]/Homo sapiens mRNA for 2-hydroxyphytanoyl-CoA lyase; thiamine pyrophosphate dependent enzyme/2-Hydroxyphytanoyl-CoA lyase (peroxisomal 2-hydroxyphytanoyl-CoA lyase), catalyzes the thiamine pyrophosphate-dependent cleavage of C-C bonds during alpha-oxidation of 3-methyl-branched fatty acids to form formyl-CoA and 2-methyl-branched fatty aldehyde                                                     |
| SW:TPP1_HUMAN                | CLN2     | 19 | 1 | 2.62 | 0.00 | SW:TPP1_HUMAN O14773 homo sapiens (human). tripeptidyl-peptidase i precursor (ec 3.4.14.9) (tpp-i) (tripeptidyl aminopeptidase) (lysosomal pepstatin insensitive protease) (lpic). 5/2000 [MASS=61229]/Tripeptidyl peptidase I (ceroid-lipofuscinosis neuronal 2), a lysosomal serine-type peptidase required for degradation of ATP synthase subunit c (ATP5G1 and ATP5G2); mutations in the corresponding gene cause late infantile neuronal ceroid lipofuscinosis             |
| GP:AF002668_1                | DEGS     | 19 | 1 | 3.29 | 0.00 | GP:AF002668_1 Homo sapiens putative fatty acid desaturase MLD mRNA, complete cds; putative fatty acid desaturase. [MASS=37866]/Degenerative spermatocyte homolog (Drosophila), member of the membrane fatty acid desaturase family, regulates the biosynthesis of the epidermal growth factor receptor (EGFR)                                                                                                                                                                    |
| SW:PA2M_HUMAN                | PLA2G2A  | 19 | 3 | 3.94 | 1.93 | SW:PA2M_HUMAN P14555 homo sapiens (human). phospholipase a2, membrane associated precursor (ec 3.1.1.4) (phosphatidylcholine 2-acylhydrolase) (group ii phospholipase a2) (non-pancreatic secretory phosph [MASS=16083]/Group IIA phospholipase A2, a secreted member of the phospholipase A2 family that hydrolyzes the phospholipid sn-2 ester bond, plays roles in phospholipid metabolism, host defense, and inflammation; gene loss reported in a sporadic colorectal tumor |
| GP:AJ002744_1                | GALNT7   | 19 | 1 | 4.00 | 0.00 | GP:AJ002744_1 Homo sapiens mRNA for UDP-GalNAc:polypeptide N-acetylgalactosaminyltransferase 7. [MASS=75402]/UDP-N-acetyl-alpha-D-galactosamine:polypeptide N-acetylgalactosaminyltransferase 7, enzyme that functions in O-glycosylation and is specific for partially glycosylated substrates                                                                                                                                                                                  |
| <b>Nucleotide Metabolism</b> |          |    |   |      |      |                                                                                                                                                                                                                                                                                                                                                                                                                                                                                  |
| SW:IMA1_HUMAN                | KPNA1    | 25 | 1 | 0.33 | 0.00 | SW:IMA1_HUMAN P52294 homo sapiens (human). importin alpha-1 subunit (karyopherin alpha-1 subunit) (srp1-beta) (rag cohort protein 2) (nucleoprotein interactor 1) (npi-1). 12/1998 [MASS=60307]/Karyopherin alpha (importin alpha), a subunit of the nuclear localization sequence (NLS) receptor complex that binds to and mediates the nuclear import of RAG1 and STAT1                                                                                                        |
| SW:ACLY_HUMAN                | ACLY     | 25 | 6 | 0.44 | 0.09 | SW:ACLY_HUMAN P53396 homo sapiens (human). atp-citrate (pro-s-)-lyase (ec 4.1.3.8) (citrate cleavage enzyme). 10/1996 [MASS=121420]/ATP citrate lyase, catalyzes the formation of acetyl-CoA and oxaloacetate from citrate and CoA with the concomitant hydrolysis of ATP to ADP and phosphate, involved in cholesterol and fatty acid synthesis, nutritionally regulated                                                                                                        |
| GP:AB007851_1                | PRPSAP2  | 25 | 4 | 0.51 | 0.10 | GP:AB007851_1 Homo sapiens mRNA for 41-kDa phosphoribosylpyrophosphate synthetase-associated protein, complete cds. [MASS=40926]/Phosphoribosyl pyrophosphate synthetase-associated protein 2, a component of phosphoribosylpyrophosphate (PRPP) synthetase that is related to the other components of PRPP synthetase (PRPS1, PRPS2 and PRPSAP1)                                                                                                                                |
| GP:AB011173_1                | KIAA0601 | 25 | 1 | 0.59 | 0.00 | GP:AB011173_1 Homo sapiens mRNA for KIAA0601 protein, partial cds. [MASS=96760]/KIAA0601 protein, a riboflavin-binding protein, member of a FAD dependent enzyme superfamily, component of the HDAC1 histone deacetylase complex, may be involved in gene silencing via covalent chromatin modification                                                                                                                                                                          |
| SW:HS71_HUMAN                | HSPA1A   | 25 | 6 | 0.62 | 0.14 | SW:HS71_HUMAN P08107 homo sapiens (human). heat shock 70 kDa protein 1 (hsp70.1) (hsp70-1/hsp70-2). 5/2000 [MASS=70052]/Heat shock 70 kDa protein 1A, a member of the HSP70 chaperone family involved in protein folding, translocation, and complex assembly, blocks AU-rich mRNA decay by nuclear sequestering of AU-rich binding protein, may contribute to celiac disease                                                                                                    |
| SW:PUR8_HUMAN                | ADSL     | 25 | 2 | 0.80 | 0.00 | SW:PUR8_HUMAN P30566 homo sapiens (human). adenylosuccinate lyase (ec 4.3.2.2) (adenylosuccinase) (asl) (asase). 5/2000 [MASS=54889]/Adenylosuccinate lyase, catalyzes two steps in adenosine monophosphate biosynthesis; deficiency is associated with psychomotor retardation, epilepsy, and autism                                                                                                                                                                            |
| SW:AMD2_HUMAN                | AMPD2    | 25 | 1 | 0.81 | 0.00 | SW:AMD2_HUMAN Q01433 homo sapiens (human). amp deaminase 2 (ec 3.5.4.6) (amp deaminase isoform I). 11/1997 [MASS=88198]/Adenosine monophosphate deaminase 2 (isoform L), catalyzes the deamination of adenosine monophosphate to form inosine monophosphate in purine nucleotide metabolism                                                                                                                                                                                      |

|                |          |    |    |      |      |                                                                                                                                                                                                                                                                                                                                                                                                                                                                          |
|----------------|----------|----|----|------|------|--------------------------------------------------------------------------------------------------------------------------------------------------------------------------------------------------------------------------------------------------------------------------------------------------------------------------------------------------------------------------------------------------------------------------------------------------------------------------|
| PIR2:S71460    | PRPS1    | 25 | 2  | 0.82 | 0.12 | PIR2:S71460 ribose-phosphate pyrophosphokinase (EC 2.7.6.1) 39K regulatory chain - human [MASS=39480]/Phosphoribosyl pyrophosphate (PRPP) synthetase 1, generates PRPP, which is required for de novo purine and pyrimidine biosynthesis; mutations causing superactivity are associated with gout and neurological impairment                                                                                                                                           |
| SW:SYA_HUMAN   | AARS     | 25 | 1  | 0.83 | 0.00 | SW:SYA_HUMAN P49588 homo sapiens (human). alanyl-tRNA synthetase (ec 6.1.1.7) (alanine--tRNA ligase) (alars). 7/1998 [MASS=106801]/Alanyl-tRNA synthetase, aminoacylates its cognate tRNA with alanine for protein biosynthesis, acts as an autoantigen in patients with polymyositis                                                                                                                                                                                    |
| SWN:ENT1_HUMAN | ENT1     | 25 | 1  | 0.83 | 0.00 | SWN:ENT1_HUMAN Q99808 homo sapiens (human). equilibrative nucleoside transporter 1 (equilibrative nitrobenzylmercaptapurine riboside-sensitive nucleoside transporter) (equilibrative nbmpr-sensitive nucle [MASS=50088]/Solute carrier family 29 member 1 (equilibrative nucleoside transporter 1), functions in the transport of physiologic nucleosides and chemotherapeutic nucleoside analog drugs, inhibited by nitrobenzylthioinosine, dipyrindamole, and dilazep |
| SW:CST1_HUMAN  | CSTF1    | 25 | 1  | 0.93 | 0.00 | SW:CST1_HUMAN Q05048 homo sapiens (human). cleavage stimulation factor, 50 kda subunit (ctsf 50 kda subunit) (cf-1 50 kda subunit). 7/1998 [MASS=48358]/Cleavage stimulation factor subunit 1, the 50 kDa subunit of the cleavage stimulation factor complex required for pre-mRNA polyadenylation and 3'-end cleavage, interacts with BARD1 and the C-terminal domain of the RNA polymerase II large subunit                                                            |
| SW:SYQ_HUMAN   | QARS     | 25 | 2  | 0.94 | 0.20 | SW:SYQ_HUMAN P47897 homo sapiens (human). glutaminyl-tRNA synthetase (ec 6.1.1.18) (glutamine--tRNA ligase) (glNrs). 5/2000 [MASS=87799]/Glutaminyl-tRNA synthetase, aminoacylates cognate tRNAs with glutamine for protein biosynthesis, also suppresses FAS (TNFRSF6)-mediated apoptosis by inhibiting ASK1 (MAP3K5) kinase activity, contains N-terminal appended and C-terminal catalytic domains                                                                    |
| SW:IMD2_HUMAN  | IMPDH2   | 25 | 8  | 0.95 | 0.32 | SW:IMD2_HUMAN P12268 homo sapiens (human). inosine-5'-monophosphate dehydrogenase 2 (ec 1.1.1.205) (imp dehydrogenase 2) (impdh-ii) (impd 2). 5/2000 [MASS=55805]/Inosine monophosphate dehydrogenase type 2, catalyzes the oxidation of inosine monophosphate to xanthosine monophosphate in GTP biosynthesis, required for T cell activation, a target for immunosuppressive and anticancer chemotherapy                                                               |
| SW:PUR6_HUMAN  | PAICS    | 25 | 7  | 0.99 | 0.09 | SW:PUR6_HUMAN P22234 homo sapiens (human). multifunctional protein ade2 [includes: phosphoribosylaminoimidazole-succinocarboxamide synthase (ec 6.3.2.6) (saicar synthetase); phosphoribosylaminoimidazol [MASS=47079]/SAICAR (phosphoribosylaminoimidazole-succinocarboxamide) synthetase and AIR (phosphoribosylaminoimidazole) carboxylase, a bifunctional protein required for de novo purine biosynthesis                                                           |
| SW:RINI_HUMAN  | RNH      | 25 | 1  | 1.01 | 0.00 | SW:RINI_HUMAN P13489 homo sapiens (human). placental ribonuclease inhibitor (ribonuclease/angiogenin inhibitor) (rai) (ri). 12/1998 [MASS=49842]/Ribonuclease and angiogenin inhibitor, tightly binds and inhibits alkaline and neutral ribonucleases and angiogenin, functions in mRNA degradation and inhibition of HT-29 human colon adenocarcinoma cell binding to angiogenin (ANG)                                                                                  |
| GP:AF132941_1  | LOC51068 | 25 | 1  | 1.02 | 0.00 | GP:AF132941_1 Homo sapiens CGI-07 protein mRNA, complete cds. [MASS=57585]/Protein with moderate similarity to S. cerevisiae Nmd3p, which is a protein involved in the nuclear export of 60S ribosomal subunits                                                                                                                                                                                                                                                          |
| PIR2:A57017    | ABCE1    | 25 | 5  | 1.03 | 0.03 | PIR2:A57017 RNase L inhibitor - human [MASS=67559]/Ribonuclease L inhibitor, inhibits the nuclease activity and 2-5A binding ability of RNase L, may be induced by HIV-1 to inhibit the 2-5A/RNase L pathway, can inhibit the antiviral activity of interferon when overexpressed                                                                                                                                                                                        |
| SW:NPM_HUMAN   | NPM1     | 25 | 3  | 1.11 | 0.14 | SW:NPM_HUMAN P06748 homo sapiens (human). nucleophosmin (npm) (nucleolar phosphoprotein b23) (numatrin) (nucleolar protein no38). 5/2000 [MASS=32575]/Nucleophosmin (numatrin), a nucleic acid-binding phosphoprotein involved in apoptosis, abundant in tumor cells; gene fusion with anaplastic lymphoma kinase (ALK) is detected in non-Hodgkin's lymphoma and fusion with MLL1 is seen in acute myeloid leukemia                                                     |
| SW:NDK6_HUMAN  | NME2     | 25 | 1  | 1.22 | 0.00 | SW:NDK6_HUMAN O60361 homo sapiens (human). putative nucleoside diphosphate kinase (ec 2.7.4.6) (ndk) (ndp kinase). 12/1998 [MASS=15529]/Nucleoside diphosphate kinase B, a transcription factor and endodeoxyribonuclease that binds to the Myc promoter, may function in DNA repair, may suppress metastasis in some tumors, displays reduced expression in breast carcinoma cells                                                                                      |
| SW:PAB1_HUMAN  | PABPC1   | 25 | 13 | 1.22 | 0.44 | SW:PAB1_HUMAN P11940 homo sapiens (human). polyadenylate-binding protein 1 (poly(a) binding protein 1) (pabp 1). 7/1998 [MASS=70671]/Poly(A)-binding protein cytoplasmic 1, binds to poly(A) tails of mRNA and plays roles in regulating mRNA stability and translation, also implicated in mRNA transport from the nucleus to the cytoplasm                                                                                                                             |
| SWN:SYFB_HUMAN | FRSB     | 25 | 4  | 1.25 | 0.44 | SWN:SYFB_HUMAN Q9nsd9 homo sapiens (human). phenylalanyl-tRNA synthetase beta chain (ec 6.1.1.20) (phenylalanine--tRNA ligase beta chain) (phers) (protein hspc173). 8/2001 [MASS=66130]/Phenylalanyl-tRNA synthetase beta-subunit, regulatory subunit that forms heterodimers with the catalytic alpha subunit (FARSL), involved in protein synthesis, may play a role in tumorigenic events                                                                            |
| SW:ROF_HUMAN   | HNRPF    | 25 | 3  | 1.37 | 0.10 | SW:ROF_HUMAN P52597 homo sapiens (human). heterogeneous nuclear ribonucleoprotein f (hnrfp f). 11/1997 [MASS=45672]/Heterogeneous nuclear ribonucleoprotein F, an RNA binding protein which contains quasi-RRMs (RNA recognition motifs) and plays a role in pre-mRNA splicing                                                                                                                                                                                           |
| PIR2:T13159    | E1B-AP5  | 25 | 3  | 1.38 | 0.41 | PIR2:T13159 E1B-55kDa-associated protein - human [MASS=95810]/E1B-55kDa-associated protein 5, a heterogeneous nuclear ribonucleoprotein involved in nucleocytoplasmic transport of adenovirus and cellular mRNAs, binds adenovirus early 1B (E1B-55 kD) protein and may regulate viral oncogenic transformation                                                                                                                                                          |
| PIR2:T02673    | HNRPR    | 25 | 3  | 1.43 | 0.18 | no_description_avail/Heterogeneous nuclear ribonucleoprotein R, a putative pre-mRNA processing protein that contains three RNA recognition domains and an RGG domain, interacts with survival motor neuron protein and is an autoantigen in autoimmune disease                                                                                                                                                                                                           |

|               |          |    |   |      |      |                                                                                                                                                                                                                                                                                                                                                                                                                                                                          |
|---------------|----------|----|---|------|------|--------------------------------------------------------------------------------------------------------------------------------------------------------------------------------------------------------------------------------------------------------------------------------------------------------------------------------------------------------------------------------------------------------------------------------------------------------------------------|
| GP:U85625_1   | RNASE6PL | 25 | 3 | 1.44 | 0.04 | GP:U85625_1 Homo sapiens ribonuclease 6 precursor, mRNA, complete cds. [MASS=29481]/Ribonuclease 6 precursor, a putative ribonuclease that plays a role in the negative regulation of proliferation, may be involved in senescence, may be a class II tumor suppressor, downregulated in ovarian cancer and in ovarian cancer cell lines                                                                                                                                 |
| GP:AF037448_1 | NSAP1    | 25 | 4 | 1.45 | 0.22 | GP:AF037448_1 Homo sapiens RRM RNA binding protein Gry-rbp (GRY-RBP) mRNA, complete cds; RRM RNA binding protein; Glycine, arginine and tyrosine-rich at C-terminus. [MASS=69633]/NS1 associated protein 1, component of the ApoB mRNA editosome involved in apolipoprotein B (APOB) mRNA editing, may bind RNA, may play a role in the regulation of mRNA splicing or transport from the nucleus                                                                        |
| SW:PYR1_HUMAN | CAD      | 25 | 6 | 1.47 | 0.46 | SW:PYR1_HUMAN P27708 homo sapiens (human). cad protein [includes: glutamine-dependent carbamoyl-phosphate synthase (ec 6.3.5.5); aspartate carbamoyltransferase (ec 2.1.3.2); dihydroorotase (ec 3.5.2.3)] [MASS=242917]/Carbamoylphosphate synthetase 2-aspartate transcarbamylase-dihydroorotase, a trifunctional enzyme that catalyzes the first three steps of pyrimidine biosynthesis                                                                               |
| SW:ROK_HUMAN  | HNRPK    | 25 | 6 | 1.51 | 0.30 | SW:ROK_HUMAN Q07244 homo sapiens (human), and rattus norvegicus (rat). heterogeneous nuclear ribonucleoprotein k (hnmp k) (dc-stretch binding protein) (csbp) (transformation upregulated nuclear protein [MASS=50976]/Heterogeneous nuclear ribonucleoprotein K, a transcription factor which binds to poly(C) of RNA and DNA and is involved in RNA processing, gene transcription and translational controls, may induce apoptosis and play a role in viral infection |
| SW:SMD3_HUMAN | SNRPD3   | 25 | 1 | 1.55 | 0.00 | SW:SMD3_HUMAN P43331 homo sapiens (human). small nuclear ribonucleoprotein sm d3 (snmp core protein d3) (sm-d3). 10/1996 [MASS=13916]/Small nuclear ribonucleoprotein D3, part of a multimeric complex involved in biogenesis of snRNPs and mRNA splicing, interacts with the spinal muscular atrophy disease protein (SMN); autoantigen for antibodies associated with systemic lupus erythematosus                                                                     |
| SW:PSS1_HUMAN | PAPSS1   | 25 | 1 | 1.56 | 0.00 | SW:PSS1_HUMAN P48651 homo sapiens (human). phosphatidylserine synthase i (serine-exchange enzyme i) (ec 2.7.8.-) (kiaa0024). 11/1997 [MASS=55528]/3'-phosphoadenosine 5'-phosphosulfate synthase 1, bifunctional polypeptide with ATP sulfurylase and adenosine 5'-phosphosulfate kinase activities, required for the synthesis of the sulfonate donor 3'-phosphoadenosine 5'-phosphosulfate                                                                             |
| SW:ROA0_HUMAN | HNRPA0   | 25 | 2 | 1.64 | 0.40 | SW:ROA0_HUMAN Q13151 homo sapiens (human). heterogeneous nuclear ribonucleoprotein a0 (hnmp a0). 5/2000 [MASS=30841]/Heterogeneous nuclear ribonucleoprotein A0, has triplet repeats, two consensus sequence-type RNA-binding domains, and a glycine-rich auxiliary domain, found in low abundance hnRNP complexes                                                                                                                                                       |
| SW:ROH1_HUMAN | HNRPH1   | 25 | 4 | 1.66 | 0.22 | SW:ROH1_HUMAN P31943 homo sapiens (human). heterogeneous nuclear ribonucleoprotein h (hnmp h). 11/1997 [MASS=49229]/Heterogeneous nuclear ribonucleoprotein H1, a pre-mRNA splicing factor that is a component of a complex that mediates post-transcriptional processing of primary transcripts                                                                                                                                                                         |
| SW:DDX1_HUMAN | DDX1     | 25 | 6 | 1.67 | 0.10 | SW:DDX1_HUMAN Q92499 homo sapiens (human). dead box protein 1 (dead box protein-retinoblastoma) (dbp-rb). 5/2000 [MASS=82432]/DEAD box protein 1, a member of the DEAD-H box ATP-dependent RNA helicase protein family, plays a role in the processing of pre-mRNAs, may interact with CSTF2; corresponding gene is coamplified with MYC in some neuroblastoma and retinoblastoma cell lines                                                                             |
| PIR2:JW0079   | HNRPDL   | 25 | 1 | 1.72 | 0.00 | PIR2:JW0079 heterogeneous nuclear ribonucleoprotein homolog JKTBP [imported] - human [MASS=33589]/Heterogeneous nuclear ribonucleoprotein D-like, an RNA- and DNA-binding protein that may play a role in mRNA biogenesis                                                                                                                                                                                                                                                |
| GP:AC003972_1 | RENT1    | 25 | 1 | 1.74 | 0.00 | GP:AC003972_1 Homo sapiens DNA from chromosome 19, cosmid R33485 containing pNORF1, complete sequence; human type 1 RNA helicase; DPS similarity to (U59323) type 1 RNA helicase pNORF1 [Homo sapiens]; Score. [MASS=123036]/regulator of nonsense transcripts 1 (nonsense mrna reducing factor 1) (norf1) (up-frameshift suppressor 1 homolog). 10/2001 [MASS=124345]                                                                                                   |
| SW:RUXF_HUMAN | SNRPF    | 25 | 1 | 1.76 | 0.00 | SW:RUXF_HUMAN Q15356 homo sapiens (human). small nuclear ribonucleoprotein f (snmp-f) (sm protein f). 7/1999 [MASS=9725]/Sm protein F, a spliceosomal snRNA-associated Sm core protein that is involved in the biogenesis of the snRNPs; a target of autoantibodies in patients with the autoimmune disease systemic lupus erythematosus                                                                                                                                 |
| GP:AF177344_1 | FLJ10581 | 25 | 1 | 1.89 | 0.00 | GP:AF177344_1 Homo sapiens clone HC90 unknown mRNA. [MASS=30998]/ weakly similar to a methyltransferase/Member of the RNA methyltransferase family, which catalyze 2'-O-methylation of ribose groups in R                                                                                                                                                                                                                                                                |
| PIR2:T09073   | SFRS2IP  | 25 | 1 | 1.89 | 0.00 | PIR2:T09073 splicing factor Sip1 - human [MASS=128875]/Splicing factor arginine serine rich 2 interacting protein, a SR domain family protein that interacts with the RNA polymerase II C-terminal domain and several splicing factors, is essential in mRNA splicing and possibly spliceosome A-complex formation                                                                                                                                                       |
| PIR2:I55595   | RNPC2    | 25 | 1 | 1.92 | 0.00 | PIR2:I55595 splicing factor - human [MASS=58657]/Splicing factor CC1.3, a novel nuclear protein and putative member of the SR family of alternative splicing factors; target of autoantibodies from a patient with hepatocellular carcinoma                                                                                                                                                                                                                              |
| PIR2:S78046   | RNASE6   | 25 | 3 | 1.94 | 0.00 | PIR2:S78046 ribonuclease 6 (EC 3.1.27.-) precursor - human [MASS=21941]/Ribonuclease k6, a ribonuclease of the ribonuclease A superfamily, possibly functions in host defense                                                                                                                                                                                                                                                                                            |
| SW:DRN2_HUMAN | DNASE2   | 25 | 3 | 2.01 | 0.42 | SW:DRN2_HUMAN O00115 homo sapiens (human). deoxyribonuclease ii precursor (ec 3.1.22.1) (dnase ii) (acid dnase) (lysosomal dnase ii) (r31240_2). 7/1999 [MASS=39581]/Deoxyribonuclease II lysosomal, an acid-activated DNA nicking enzyme, may participate in DNA fragmentation during apoptosis, induces apoptotic chromosome condensation when transfected into cell lines                                                                                             |
| SW:SMD2_HUMAN | SNRPD2   | 25 | 2 | 2.02 | 0.82 | SW:SMD2_HUMAN P43330 homo sapiens (human). small nuclear ribonucleoprotein sm d2 (snmp core protein d2) (sm-d2). 10/1996 [MASS=13527]/Small nuclear ribonucleoprotein D2 polypeptide, one of seven common core snRNP proteins involved in snRNP biogenesis and pre-mRNA splicing, autoantigen for anti-Sm antibodies produced by individuals with systemic lupus erythematosus                                                                                           |



|                          |          |    |    |      |      |                                                                                                                                                                                                                                                                                                                                                                                                                                                                                      |
|--------------------------|----------|----|----|------|------|--------------------------------------------------------------------------------------------------------------------------------------------------------------------------------------------------------------------------------------------------------------------------------------------------------------------------------------------------------------------------------------------------------------------------------------------------------------------------------------|
| SW:U2AF_HUMAN            | U2AF65   | 25 | 1  | 2.05 | 0.00 | SW:U2AF_HUMAN P26368 homo sapiens (human). splicing factor u2af 65 kda subunit (u2 auxiliary factor 65 kda subunit) (u2 snmp auxiliary factor large subunit). 12/1998 [MASS=53501]/U2 small nuclear ribonucleoprotein auxiliary factor (65 kDa), a component of U2 small nucleoprotein auxiliary factor, which is necessary for mRNA splicing, binds to pre-mRNA                                                                                                                     |
| GP:D21163_1              | U5-116KD | 25 | 1  | 2.11 | 0.00 | GP:D21163_1 Human mRNA for KIAA0031 gene, complete cds; similar to human elongation factor 2 mRNA (HSEF2).. [MASS=109436]/U5 snRNP-specific protein 116 kD, a spliceosome component with GTPase activity, plays a role in mRNA splicing and processing                                                                                                                                                                                                                               |
| SW:RU17_HUMAN            | SNRP70   | 25 | 3  | 2.11 | 0.26 | SW:RU17_HUMAN P08621 homo sapiens (human). u1 small nuclear ribonucleoprotein 70 kda (u1 snmp 70 kda) (snrp70). 11/1995 [MASS=70081]/U1 small nuclear 70 kDa ribonucleoprotein, involved in pre mRNA splicing, acts as an autoantigen in systemic lupus erythematosus and mixed connective tissue disease                                                                                                                                                                            |
| PIR2:A54601              | HNRPD    | 25 | 9  | 2.17 | 0.65 | PIR2:A54601 RNA-binding protein AUF1 - human [MASS=31200]/Heterogeneous nuclear ribonucleoprotein D (AU-rich element RNA-binding protein 1 37kD), an RNA and DNA-binding protein which binds to AU-rich elements in the 3' untranslated regions of mRNAs and mediates their degradation                                                                                                                                                                                              |
| SW:NHPX_HUMAN            | NHP2L1   | 25 | 2  | 2.21 | 0.20 | SW:NHPX_HUMAN P55769 homo sapiens (human). nhp2/rs6 family protein yel026w homolog (high mobility group-like nuclear protein 2 homolog) (otk27). 5/2000 [MASS=14174]/Non-histone chromosome protein 2 (S. cerevisiae)-like 1, a member of a family of RNP-associated proteins, a component of the spliceosome and rRNA processing machinery, recognizes a shared stem-internal loop-stem structure in its RNA targets                                                                |
| SW:DDX5_HUMAN            | DDX5     | 25 | 1  | 2.27 | 0.00 | SW:DDX5_HUMAN P17844 homo sapiens (human). probable rna-dependent helicase p68 (dead-box protein p68) (dead box protein 5). 7/1998 [MASS=69148]/DEAD/H (Asp-Glu-Ala-Asp/His) box polypeptide 5 (RNA helicase 68kD), a ATP-dependent RNA helicase that has ATP-independent RNA renaturation activity and catalyses branch migration, binds estrogen receptor alpha and function as a transcriptional coactivator                                                                      |
| SW:U2AG_HUMAN            | U2AF35   | 25 | 2  | 2.34 | 0.02 | SW:U2AG_HUMAN Q01081 homo sapiens (human). splicing factor u2af 35 kda subunit (u2 auxiliary factor 35 kda subunit) (u2 snmp auxiliary factor small subunit). 12/1998 [MASS=27872]/U2(RNU2) small nuclear RNA auxiliary factor 1, functions as a pre-mRNA splicing protein, involved in the functional recognition of the 3' splice site AG dinucleotide, interacts with ZNF265 protein involved in alternative splicing                                                             |
| SW:ROU_HUMAN             | HNRPU    | 25 | 29 | 2.48 | 0.62 | SW:ROU_HUMAN Q00839 homo sapiens (human). heterogenous nuclear ribonucleoprotein u (hnmp u) (scaffold attachment factor a) (saf-a). 5/2000 [MASS=90479]/Heterogeneous nuclear ribonucleoprotein U (scaffold attachment factor A), binds RNA, binds EP300 in a complex that binds scaffold-matrix attachment regions of TOP1, involved in chromatin structure, apoptosis, and perhaps RNA processing and transcription                                                                |
| SW:ROA1_HUMAN            | HNRPA1   | 25 | 11 | 2.48 | 0.85 | SW:ROA1_HUMAN P09651 homo sapiens (human). heterogeneous nuclear ribonucleoprotein a1 (helix-destabilizing protein) (single-strand binding protein) (hnmp core protein a1). 11/1997 [MASS=38715]/Heterogeneous nuclear ribonucleoprotein A1, an RNA-binding protein involved in mRNA splicing and translational control, undergoes nucleocytoplasmic shuttling possibly for mRNA export and telomerase recruitment; an autoantigen in autoimmune disorders                           |
| SW:DD17_HUMAN            | DDX17    | 25 | 1  | 2.58 | 0.00 | SW:DD17_HUMAN Q92841 homo sapiens (human). probable rna-dependent helicase p72 (dead-box protein p72) (dead box protein 17). 5/2000 [MASS=72371]/DEAD H box protein 17, a member of the DEAD box family of RNA-dependent ATPases and ATP-dependent RNA helicases, a component of an estrogen receptor alpha (ESR) transcriptional coactivator complex                                                                                                                                |
| SW:Y017_HUMAN            | SF3B3    | 25 | 7  | 2.63 | 0.59 | SW:Y017_HUMAN Q15393 homo sapiens (human). hypothetical protein k1aa0017. 5/2000 [MASS=44606]/ Homo sapiens mRNA for SAP 130 spliceosomal protein/Splicing factor 3b subunit 3, a component of the U2 snRNP-associated protein complex SF3b that plays a role in spliceosome assembly, interacts with STAGA and TFTC complexes implicated in DNA repair, chromatin modification, and transcription                                                                                   |
| SW:NR54_HUMAN            | NONO     | 25 | 2  | 3.38 | 1.09 | SW:NR54_HUMAN Q15233 homo sapiens (human). 54 kda nuclear rna-binding protein (p54(nrb)) (p54nrb) (55 kda nuclear protein) (nmt55). 5/2000 [MASS=54232]/Non-POU-domain-containing octamer-binding nuclear protein, binds DNA and RNA, and implicated in transcription and pre-mRNA splicing; a fusion partner with TFE3 in papillary renal cell carcinoma                                                                                                                            |
| SW:SFR7_HUMAN            | SFRS7    | 25 | 2  | 3.66 | 0.49 | SW:SFR7_HUMAN Q16629 homo sapiens (human). splicing factor, arginine/serine-rich 7 (splicing factor 9g8). 5/2000 [MASS=27367]/Splicing factor arginine serine rich 7, a splicing factor of the SR protein family containing an RNA binding domain (RBD) and a serine/arginine (SR) domain that is implicated in alternative pre-mRNA splicing                                                                                                                                        |
| <b>Protein Synthesis</b> |          |    |    |      |      |                                                                                                                                                                                                                                                                                                                                                                                                                                                                                      |
| SW:RS12_HUMAN            | RPS12    | 35 | 2  | 0.40 | 0.09 | SW:RS12_HUMAN P25398 homo sapiens (human). 40s ribosomal protein s12. 5/2000 [MASS=14395]/Ribosomal protein S12, a component of the small 40S ribosomal subunit; overexpressed in colorectal cancer                                                                                                                                                                                                                                                                                  |
| PIR2:JC4775              | DNAJC3   | 35 | 2  | 0.51 | 0.27 | PIR2:JC4775 p58k protein - human [MASS=57580]/The 58,000-dalton cellular inhibitor of the interferon-induced double-stranded RNA-activated protein kinase (PKR) is a member of the tetratricopeptide repeat family of proteins/DnaJ (Hsp40) homolog subfamily C member 3 (protein kinase inhibitor p58), a member of the tetratricopeptide repeat family of proteins that may act as a cochaperone that inhibits the activity of double-stranded RNA-dependent protein kinase (PRKR) |
| SW:SYTC_HUMAN            | TARS     | 35 | 4  | 0.51 | 0.06 | SW:SYTC_HUMAN P26639 homo sapiens (human). threonyl-trna synthetase, cytoplasmic (ec 6.1.1.3) (threonine-trna ligase) (thrrs). 6/1994 [MASS=82124]/Threonyl-tRNA synthetase, a class II aminoacyl tRNA synthetase which aminoacylates its cognate tRNAs with threonine for protein synthesis, autoantigen in several autoimmune disorders                                                                                                                                            |

|                |               |    |    |      |      |                                                                                                                                                                                                                                                                                                                                                                                                                                                                                         |
|----------------|---------------|----|----|------|------|-----------------------------------------------------------------------------------------------------------------------------------------------------------------------------------------------------------------------------------------------------------------------------------------------------------------------------------------------------------------------------------------------------------------------------------------------------------------------------------------|
| SW:IF2P_HUMAN  | IF2           | 35 | 2  | 0.65 | 0.02 | SW:IF2P_HUMAN O60841 homo sapiens (human). translation initiation factor if-2. 5/2000 [MASS=138755]/Translation initiation factor, member of the Tu elongation factor family, has moderate similarity to yeast YAL035W translation initiation factor 2 (eIF2)                                                                                                                                                                                                                           |
| SW:RL7A_HUMAN  | RPL7A         | 35 | 1  | 0.67 | 0.00 | SW:RL7A_HUMAN P11518 homo sapiens (human), and rattus norvegicus (rat). 60s ribosomal protein l7a (surfeit locus protein 3) (pla-x polypeptide). 7/1999 [MASS=29864]/Ribosomal protein L7a (surfeit-3), a putative component of the 60S ribosomal subunit, likely to be involved in protein biosynthesis and in colorectal carcinogenesis; trk-2h fusion oncogene in breast cancer cells comprises a fragment of RPL7A fused to TRK                                                     |
| SW:SYG_HUMAN   | GARS          | 35 | 1  | 0.69 | 0.00 | SW:SYG_HUMAN P41250 homo sapiens (human). glycyl-trna synthetase (ec 6.1.1.14) (glycine--trna ligase) (glyrs). 10/1996 [MASS=77531]/Glycyl-tRNA synthetase; functions in protein biosynthesis, aminoacylates its cognate tRNAs with phenylalanine/Glycyl-tRNA synthetase, a class II aminoacyl-tRNA synthetase that catalyzes aminoacylation of its cognate tRNA with glycine for protein biosynthesis; an autoantigen in dermatomyositis                                               |
| SW:IF32_HUMAN  | TRIP1         | 35 | 3  | 0.72 | 0.09 | SW:IF32_HUMAN Q13347 homo sapiens (human). eukaryotic translation initiation factor 3 subunit 2 (eif-3 beta) (eif3 p36) (tgf-beta receptor interacting protein 1) (trip-1). 5/2000 [MASS=36502]/Eukaryotic translation initiation factor 3 subunit 2, an eIF3 subunit with a predicted role in translation initiation, binds transforming growth factor beta receptor II (TGFB2) and acts as a modulator of TGFB2 signaling pathways                                                    |
| SW:RS4_HUMAN   | RPS4X         | 35 | 3  | 0.73 | 0.14 | SW:RS4_HUMAN P12750 homo sapiens (human), rattus norvegicus (rat), mus musculus (mouse), mesocricetus auratus (golden hamster), and felis silvestris catus (cat). 40s ribosomal protein s4, x isoform (sin [MASS=29467]/Ribosomal protein S4 X-linked, a component of the small 40S ribosomal subunit with roles in translation, cell cycle, and cell proliferation; gene is X-linked but escapes X inactivation, and may therefore contribute to haploinsufficiency in Turner syndrome |
| SW:SYD_HUMAN   | DARS          | 35 | 4  | 0.77 | 0.15 | SW:SYD_HUMAN P14868 homo sapiens (human). aspartyl-trna synthetase (ec 6.1.1.12) (aspartate--trna ligase) (asprs). 11/1997 [MASS=57192]/Aspartyl-tRNA synthetase, a class II aminoacyl tRNA synthetase that aminoacylates its cognate tRNA with aspartate for protein biosynthesis, associates with a multisynthetase complex, N-terminus may aid interaction with elongation factor 1 alpha                                                                                            |
| SW:EF11_HUMAN  | EEF1A1        | 35 | 11 | 0.78 | 0.11 | SW:EF11_HUMAN P04720 homo sapiens (human), and oryctolagus cuniculus (rabbit). elongation factor 1-alpha 1 (ef-1-alpha-1) (elongation factor tu) (ef- tu). 12/1998 [MASS=50141]/Eukaryotic translation elongation factor 1 alpha 1, involved in cytoskeletal rearrangement, has putative roles in translational elongation and senescence and GTP binding; possibly involved in diabetes, Fely syndrome, and HIV life cycle                                                             |
| SW:SYA_HUMAN   | AARS          | 35 | 1  | 0.83 | 0.00 | SW:SYA_HUMAN P49588 homo sapiens (human). alanyl-trna synthetase (ec 6.1.1.7) (alanine--trna ligase) (alars). 7/1998 [MASS=106801]/Alanyl-tRNA synthetase, aminoacylates its cognate tRNA with alanine for protein biosynthesis, acts as an autoantigen in patients with polymyositis                                                                                                                                                                                                   |
| SW:SYR_HUMAN   | RARS          | 35 | 7  | 0.84 | 0.08 | SW:SYR_HUMAN P54136 homo sapiens (human). arginyl-trna synthetase (ec 6.1.1.19) (arginine--trna ligase) (argrs). 5/2000 [MASS=74977]/Arginyl-tRNA synthetase, aminoacylates its cognate tRNAs with arginine for protein biosynthesis                                                                                                                                                                                                                                                    |
| SW:SYM_HUMAN   | MARS          | 35 | 9  | 0.87 | 0.18 | SW:SYM_HUMAN P56192 homo sapiens (human). methionyl-trna synthetase (ec 6.1.1.10) (methionine--trna ligase) (metrs). 12/1998 [MASS=101129]/Methionine-tRNA synthetase, putative tRNA synthetase that is predicted to aminoacylate its cognate tRNAs with methionine for protein biosynthesis, required for rRNA synthesis in the nucleolus                                                                                                                                              |
| SW:RL8_HUMAN   | RPL8          | 35 | 4  | 0.88 | 0.57 | SW:RL8_HUMAN P25120 homo sapiens (human), rattus norvegicus (rat), and mus musculus (mouse). 60s ribosomal protein l8. 5/2000 [MASS=28025]/Ribosomal protein L8, putative component of the large 60S ribosomal subunit                                                                                                                                                                                                                                                                  |
| PIR2:B55053    | SCYE1         | 35 | 9  | 0.88 | 0.07 | PIR2:B55053 endothelial monocyte-activating protein II precursor - human [MASS=34254]/Endothelial monocyte activating polypeptide II, a proinflammatory cytokine that interacts with ATP synthase and inhibits endothelial cell growth, released during apoptosis, may sensitize tumors to killing by tumor necrosis factor alpha (TNF)                                                                                                                                                 |
| SW:SYEP_HUMAN  | EPRS          | 35 | 23 | 0.92 | 0.84 | SW:SYEP_HUMAN P07814 homo sapiens (human). multifunctional aminoacyl-trna synthetase [includes: glutamyl-trna synthetase (ec 6.1.1.17) (glutamate--trna ligase); prolyl-trna synthetase (ec 6.1.1.15) (pro [MASS=163026]/Glutamyl-prolyl-tRNA synthetase, a bifunctional enzyme with two functionally separable domains, one that aminoacylates prolyl-tRNA with proline and another that is believed to aminoacylate glutamyl-tRNA with glutamate for protein biosynthesis             |
| SWN:E2BD_HUMAN | DKFZP586J0119 | 35 | 2  | 0.94 | 0.19 | SWN:E2BD_HUMAN Q9ui10 homo sapiens (human). translation initiation factor eif-2b delta subunit (eif-2b gdp-gtp exchange factor). 8/2001 [MASS=57599]/Protein with strong similarity to eukaryotic translation initiation factor 2B delta subunit (rat Eif2b), which is a guanine nucleotide-exchange factor subunit of eIF-2B that mediates inhibition of eIF-2B, member of the initiation factor 2 subunit family                                                                      |
| SW:SYQ_HUMAN   | QARS          | 35 | 2  | 0.94 | 0.20 | SW:SYQ_HUMAN P47897 homo sapiens (human). glutaminyl-trna synthetase (ec 6.1.1.18) (glutamine--trna ligase) (glnrs). 5/2000 [MASS=87799]/Glutaminyl-tRNA synthetase, aminoacylates cognate tRNAs with glutamine for protein biosynthesis, also suppresses FAS (TNFRSF6)-mediated apoptosis by inhibiting ASK1 (MAP3K5) kinase activity, contains N-terminal appended and C-terminal catalytic domains                                                                                   |
| SW:SYV_HUMAN   | VAR2          | 35 | 4  | 0.95 | 0.14 | SW:SYV_HUMAN P26640 homo sapiens (human). valyl-trna synthetase (ec 6.1.1.9) (valine--trna ligase) (valrs). 2/1996 [MASS=140377]/Valyl-tRNA synthetase 2, a putative class I tRNA sythetase, predicted to function in aminoacylation of valyl tRNAs for protein biosynthesis                                                                                                                                                                                                            |
| SW:IF5A_HUMAN  | EIF5A         | 35 | 4  | 0.96 | 0.06 | SW:IF5A_HUMAN P10159 homo sapiens (human). initiation factor 5a (eif-5a) (eif-4d) (rev binding factor). 5/2000 [MASS=16701]/Eukaryotic initiation factor 5A, a translation initiation factor, also an HIV-1 transactivator protein Rev cofactor that exports viral mRNA from the nucleus                                                                                                                                                                                                |

|                |          |    |    |      |      |                                                                                                                                                                                                                                                                                                                                                                                                                                 |
|----------------|----------|----|----|------|------|---------------------------------------------------------------------------------------------------------------------------------------------------------------------------------------------------------------------------------------------------------------------------------------------------------------------------------------------------------------------------------------------------------------------------------|
| SW:RM03_HUMAN  | MRPL3    | 35 | 1  | 0.96 | 0.00 | SW:RM03_HUMAN P09001 homo sapiens (human). mitochondrial 60s ribosomal protein l3. 8/1992 [MASS=38633]/Mitochondrial ribosomal protein L3, a likely component of the large mitochondrial 60S ribosomal subunit, may be involved in mRNA binding to the ribosome, can interact with the 3' UTR of hepatitis C; elevated levels are associated with hepatocarcinoma                                                               |
| SWN:SU12_HUMAN | GC20     | 35 | 4  | 0.98 | 0.06 | SWN:SU12_HUMAN Q9unq9 homo sapiens (human). protein translation factor sui1 homolog a121. 8/2001 [MASS=12745]/Translation factor sui1 homolog, a translation initiation factor, plays a role in initiating translation, may modulate translation initiation during periods of cell stress such as UV-induced and endoplasmic reticulum stress                                                                                   |
| SW:RL32_HUMAN  | RPL32    | 35 | 7  | 1.00 | 0.12 | SW:RL32_HUMAN P02433 homo sapiens (human), mus musculus (mouse), and rattus norvegicus (rat). 60s ribosomal protein l32. 6/1994 [MASS=15729]/Ribosomal protein L32, an RNA-binding structural component of the large 60S ribosomal subunit that is likely to play a role in protein biosynthesis                                                                                                                                |
| GP:AF112214_1  | RPL13    | 35 | 1  | 1.01 | 0.00 | GP:AF112214_1 Homo sapiens ribosomal protein L13 mRNA, complete cds; RPL13. [MASS=19917]/Ribosomal protein L13, putative component of the 60S ribosomal subunit, expressed at higher levels in benign breast lesions than in carcinomas                                                                                                                                                                                         |
| SW:SYK_HUMAN   | KARS     | 35 | 7  | 1.01 | 0.18 | SW:SYK_HUMAN Q15046 homo sapiens (human). lysyl-trna synthetase (ec 6.1.1.6) (lysine--trna ligase) (lysr) (k1aa0070). 7/1998 [MASS=68034]/Lysyl-tRNA synthetase, a class II aminoacyl tRNA synthetase, aminoacylates its cognate tRNAs with lysine for protein biosynthesis, packaged into HIV virions, exists as cytoplasmic and mitochondrial alternative forms                                                               |
| GP:AB037819_1  | RRBP1    | 35 | 7  | 1.02 | 0.13 | GP:AB037819_1 Homo sapiens mRNA for KIAA1398 protein, partial cds; Start codon is not identified.. [MASS=170212]/Ribosome binding protein 1, a putative ribosome receptor, may play a role in protein biosynthesis, appears to be involved in cardiac development, may play a role in cardiac remodeling in heart failure                                                                                                       |
| GP:AF132941_1  | LOC51068 | 35 | 1  | 1.02 | 0.00 | GP:AF132941_1 Homo sapiens CGI-07 protein mRNA, complete cds. [MASS=57585]/Protein with moderate similarity to S. cerevisiae Nmd3p, which is a protein involved in the nuclear export of 60S ribosomal subunits                                                                                                                                                                                                                 |
| SW:EF1G_HUMAN  | EEF1G    | 35 | 7  | 1.05 | 0.15 | SW:EF1G_HUMAN P26641 homo sapiens (human). elongation factor 1-gamma (ef-1-gamma). 5/2000 [MASS=50119]/Eukaryotic elongation factor 1 gamma, a likely translation elongation factor 1 (EF-1) complex component that binds cytoplasmic cysteinyl-tRNA synthetase and possibly EF-1 beta; overexpression in gastric carcinoma correlates with vascular permeation                                                                 |
| SW:RS8_HUMAN   | RPS8     | 35 | 9  | 1.07 | 0.56 | SW:RS8_HUMAN P09058 homo sapiens (human), rattus norvegicus (rat), and mus musculus (mouse). 40s ribosomal protein s8. 2/1996 [MASS=24074]/Ribosomal protein S8, component of the small 40S ribosomal subunit                                                                                                                                                                                                                   |
| SW:IF4G_HUMAN  | EIF4G1   | 35 | 2  | 1.08 | 0.39 | SW:IF4G_HUMAN Q04637 homo sapiens (human). eukaryotic translation initiation factor 4 gamma (eif-4-gamma) (eif-4g) (eif4g) (p220). 7/1999 [MASS=153361]/Eukaryotic translation initiation factor 4 gamma 1, gamma subunit of eIF4, functions in translation initiation, binds RNA and forms a bridge between the mRNA cap and polyA tail, cleaved during apoptosis and poliovirus infection                                     |
| SW:EF2_HUMAN   | EEF2     | 35 | 39 | 1.09 | 0.20 | SW:EF2_HUMAN P13639 homo sapiens (human). elongation factor 2 (ef-2). 12/1998 [MASS=95338]/Translation elongation factor 2, member of the superfamily of GTP hydrolases, binds ribosomes, catalyzes the translocation step of peptide elongation in protein biosynthesis, target of ADP-ribosylation by diphtheria toxin and Pseudomonas exotoxin                                                                               |
| SW:SYI_HUMAN   | IARS     | 35 | 9  | 1.10 | 0.16 | SW:SYI_HUMAN P41252 homo sapiens (human). isoleucyl-trna synthetase, cytoplasmic (ec 6.1.1.5) (isoleucine--trna ligase) (ilers) (irs). 7/1999 [MASS=144959]/Isoleucine-tRNA synthetase, a class I aminoacyl tRNA synthetase, aminoacylates isoleucyl-tRNA with isoleucine for protein biosynthesis, acts as an autoantigen in some autoimmune diseases                                                                          |
| GP:AF132939_1  | LOC51067 | 35 | 1  | 1.11 | 0.00 | GP:AF132939_1 Homo sapiens CGI-04 protein mRNA, complete cds. [MASS=53063]/Member of the class I tryptophanyl and tyrosyl (W and Y) tRNA synthetase family, has low similarity to tyrosyl-tRNA synthetase mitochondrial (S. cerevisiae Msy1p), which is involved in tyrosyl-tRNA aminoacylation                                                                                                                                 |
| SW:IF38_HUMAN  | EIF3S8   | 35 | 5  | 1.11 | 0.32 | SW:IF38_HUMAN Q99613 homo sapiens (human). eukaryotic translation initiation factor 3 subunit 8 (eif3 p110). 5/2000 [MASS=105344]/Translation initiation factor 3 subunit 8, 110 kDa eIF3 subunit that recruits translation initiation factor 1 (human SUI1) to 40S ribosomes, interacts with viral internal ribosome entry sites, and may be involved in seminoma development                                                  |
| SW:RL3_HUMAN   | RPL3     | 35 | 2  | 1.11 | 0.01 | SW:RL3_HUMAN P39023 homo sapiens (human). 60s ribosomal protein l3 (hiv-1 tar rna binding protein b) (tarbp-b). 5/2000 [MASS=45978]/Ribosomal protein L3, component of the large 60S ribosomal subunit; overexpressed in rapidly dividing cells                                                                                                                                                                                 |
| SW:E2BE_HUMAN  | EIF2B5   | 35 | 1  | 1.12 | 0.00 | SW:E2BE_HUMAN Q13144 homo sapiens (human). translation initiation factor eif-2b epsilon subunit (eif-2b gdp-gtp exchange factor) (fragment). 7/1999 [MASS=72237]/Translation initiation factor 2B subunit 5 (epsilon, 82kD), putative guanyl-nucleotide exchange factor component of the translation initiation factor 2B complex, predicted to mediate the exchange of GDP bound to translation initiation factor eIF2 for GTP |
| SW:RL9_HUMAN   | RPL9     | 35 | 8  | 1.12 | 0.30 | SW:RL9_HUMAN P32969 homo sapiens (human). 60s ribosomal protein l9. 5/2000 [MASS=21863]/Ribosomal protein L9, putative component of the large 60S ribosomal subunit                                                                                                                                                                                                                                                             |
| SW:RS5_HUMAN   | RPS5     | 35 | 19 | 1.12 | 0.89 | SW:RS5_HUMAN P46782 homo sapiens (human). 40s ribosomal protein s5. 5/2000 [MASS=22777]/Ribosomal protein S5, a component of the 40S ribosomal subunit; gene expression is altered in colorectal carcinoma cells                                                                                                                                                                                                                |
| SW:RS25_HUMAN  | RPS25    | 35 | 4  | 1.13 | 0.24 | SW:RS25_HUMAN P25111 homo sapiens (human), and rattus norvegicus (rat). 40s ribosomal protein s25. 10/1993 [MASS=13742]/Ribosomal protein S25, a putative RNA-binding component of the small 40S ribosomal subunit that may play a role in protein biosynthesis                                                                                                                                                                 |

|                |        |    |    |      |      |                                                                                                                                                                                                                                                                                                                                                                                                                                                                                       |
|----------------|--------|----|----|------|------|---------------------------------------------------------------------------------------------------------------------------------------------------------------------------------------------------------------------------------------------------------------------------------------------------------------------------------------------------------------------------------------------------------------------------------------------------------------------------------------|
| SW:IF2A_HUMAN  | EIF2S1 | 35 | 1  | 1.16 | 0.00 | SW:IF2A_HUMAN P05198 homo sapiens (human). eukaryotic translation initiation factor 2 alpha subunit (eif-2- alpha). 7/1999 [MASS=35981]/Eukaryotic translation initiation factor 2 subunit 1 (alpha subunit of eIF2), a translation initiation factor, involved in translational regulation, inhibited by phosphorylation                                                                                                                                                             |
| SW:RS29_HUMAN  | RPS29  | 35 | 1  | 1.17 | 0.00 | SW:RS29_HUMAN P30054 homo sapiens (human), mus musculus (mouse), rattus norvegicus (rat), and bos taurus (bovine). 40s ribosomal protein s29. 5/2000 [MASS=6546]/Ribosomal protein S29, a component of the small 40S ribosomal subunit, contains a zinc finger-like motif, enhances activity of the tumor suppressor Krev-1 (RAP1A)                                                                                                                                                   |
| SW:RS14_HUMAN  | RPS14  | 35 | 3  | 1.20 | 0.12 | SW:RS14_HUMAN P06366 homo sapiens (human), and cricetus griseus (chinese hamster). 40s ribosomal protein s14. 8/1992 [MASS=16273]/Ribosomal protein S14, a putative component of the small 40S ribosomal subunit, may play a role in protein biosynthesis, may bind RNA, upregulated in prostate carcinoma cell lines                                                                                                                                                                 |
| SW:EF12_HUMAN  | EEF1A2 | 35 | 6  | 1.22 | 0.11 | SW:EF12_HUMAN Q05639 homo sapiens (human). elongation factor 1-alpha 2 (ef-1-alpha-2) (statin s1). 12/1998 [MASS=50470]/Eukaryotic translation elongation factor 1 alpha 2, a putative translation elongation factor, upregulated in an estrogen receptor-expressing breast carcinoma cell line; mutation in mouse Eef1a2 causes the multiple-defect wasted phenotype                                                                                                                 |
| SW:PAB1_HUMAN  | PABPC1 | 35 | 13 | 1.22 | 0.44 | SW:PAB1_HUMAN P11940 homo sapiens (human). polyadenylate-binding protein 1 (poly(a) binding protein 1) (pabp 1). 7/1998 [MASS=70671]/Poly(A)-binding protein cytoplasmic 1, binds to poly(A) tails of mRNA and plays roles in regulating mRNA stability and translation, also implicated in mRNA transport from the nucleus to the cytoplasm                                                                                                                                          |
| SW:IF2G_HUMAN  | EIF2S3 | 35 | 22 | 1.23 | 0.22 | SW:IF2G_HUMAN P41091 homo sapiens (human). eukaryotic translation initiation factor 2 gamma subunit (eif-2- gamma). 5/2000 [MASS=50978]/Eukaryotic initiation factor 2G, gamma subunit of the heterotrimeric GTP binding protein involved in recruitment of Met-tRNAi to the 40S ribosomal subunit, activity is regulated by herpes simplex virus type 1 gamma 34.5 and by the cellular GADD34 proteins                                                                               |
| SW:IF37_HUMAN  | EIF3S7 | 35 | 6  | 1.23 | 0.32 | SW:IF37_HUMAN O15371 homo sapiens (human). eukaryotic translation initiation factor 3 subunit 7 (eif-3 zeta) (eif3 p66). 5/2000 [MASS=63973]/Eukaryotic translation initiation factor 3 subunit 7, mRNA-binding subunit of the translation initiation factor 3 complex, which mediates dissociation of 80S ribosomes and stabilizes initiator Met-tRNAi binding to 40S subunits                                                                                                       |
| SW:RL4_HUMAN   | RPL4   | 35 | 17 | 1.23 | 0.33 | SW:RL4_HUMAN P36578 homo sapiens (human). 60s ribosomal protein l4 (l1). 12/1998 [MASS=47759]/Ribosomal protein L4, a putative component of the large 60S ribosomal subunit, may bind RNA                                                                                                                                                                                                                                                                                             |
| SW:RS17_HUMAN  | RPS17  | 35 | 6  | 1.23 | 0.24 | SW:RS17_HUMAN P08708 homo sapiens (human). 40s ribosomal protein s17. 8/1992 [MASS=15419]/Ribosomal protein S17, component of the small 40S ribosomal subunit                                                                                                                                                                                                                                                                                                                         |
| SW:RS3A_HUMAN  | RPS3A  | 35 | 13 | 1.23 | 0.20 | SW:RS3A_HUMAN P49241 homo sapiens (human), and felis silvestris catus (cat). 40s ribosomal protein s3a. 5/2000 [MASS=29814]/Ribosomal protein S3A (v fos transformation effector), component of the 40S ribosomal subunit, may play roles in apoptosis, cell growth and protein biosynthesis                                                                                                                                                                                          |
| GP:AF257077_1  | EIF2B3 | 35 | 2  | 1.24 | 0.11 | GP:AF257077_1 Homo sapiens eukaryotic translation initiation factor EIF2B subunit 3 (EIF2B3) mRNA, complete cds; eukaryotic translation initiation factor EIF2Bgamma; guanine nucleotide exchange factor. [MASS=50240]/Eukaryotic translation initiation factor 2B gamma subunit, has a putative role in the initiation of protein synthesis; acts as a cofactor for hepatitis C virus IRES-mediated translation                                                                      |
| SWN:SYFB_HUMAN | FRSB   | 35 | 4  | 1.25 | 0.44 | SWN:SYFB_HUMAN Q9nsd9 homo sapiens (human). phenylalanyl-trna synthetase beta chain (ec 6.1.1.20) (phenylalanine--trna ligase beta chain) (phers) (protein hscp173). 8/2001 [MASS=66130]/Phenylalanyl-tRNA synthetase beta-subunit, regulatory subunit that forms heterodimers with the catalytic alpha subunit (FARSL), involved in protein synthesis, may play a role in tumorigenic events                                                                                         |
| SW:SR09_HUMAN  | SRP9   | 35 | 7  | 1.25 | 0.29 | SW:SR09_HUMAN P49458 homo sapiens (human). signal recognition particle 9 kda protein (srp9). 12/1998 [MASS=9981]/Signal recognition particle 9 kDa, a subunit of the signal recognition particle that forms the Alu RNA-binding protein and binds to Alu RNA with SRP14, involved in translocation of newly synthesized proteins across the membrane of the rough ER                                                                                                                  |
| SW:RL23_HUMAN  | RPL23  | 35 | 10 | 1.30 | 0.27 | SW:RL23_HUMAN P23131 homo sapiens (human), rattus norvegicus (rat), and sus scrofa (pig). 60s ribosomal protein l23 (l17). 7/1999 [MASS=14865]/Ribosomal protein L23, a putative large ribosomal subunit component that is likely to play a role in protein biosynthesis                                                                                                                                                                                                              |
| SW:RS21_HUMAN  | RPS21  | 35 | 3  | 1.30 | 0.29 | SW:RS21_HUMAN P35265 homo sapiens (human), and sus scrofa (pig). 40s ribosomal protein s21. 5/2000 [MASS=9111]/Ribosomal protein S21, component of the small 40S ribosomal subunit                                                                                                                                                                                                                                                                                                    |
| SW:ERF1_HUMAN  | ETF1   | 35 | 1  | 1.32 | 0.00 | SW:ERF1_HUMAN P46055 homo sapiens (human), mesocricetus auratus (golden hamster), and oryctolagus cuniculus (rabbit). eukaryotic peptide chain release factor subunit 1 (erf1) (tb3-1) (c11 protein). 5/20 [MASS=49031]/ Eukaryotic translation termination factor 1, an RNA binding translation release factor involved in translation termination, expression is increased in H. pylori infected gastric cancer cells; may be candidate gene for certain malignant myeloid diseases |
| SW:RL5_HUMAN   | RPL5   | 35 | 7  | 1.32 | 0.51 | SW:RL5_HUMAN P46777 homo sapiens (human). 60s ribosomal protein l5. 7/1999 [MASS=34317]/Ribosomal protein L5, a putative component of the 60S ribosomal subunit, binds 5S rRNA, undergoes nuclear export, may play a role in rev-mediated HIV-1 RNA nucleocytoplasmic transport; expression is altered in colorectal cancer and astrocytomas                                                                                                                                          |
| GPN:AF293383_1 | ABCF1  | 35 | 1  | 1.33 | 0.00 | ATP-binding cassette subfamily F member 1, a member of the ATP-binding cassette family that does not contain a transmembrane domain and may play a role in translation                                                                                                                                                                                                                                                                                                                |
| SW:RS11_HUMAN  | RPS11  | 35 | 8  | 1.33 | 0.07 | SW:RS11_HUMAN P04643 homo sapiens (human), rattus norvegicus (rat), and mus musculus (mouse). 40s ribosomal protein s11. 5/2000 [MASS=18431]/Ribosomal protein S11, putative component of the small 40S ribosomal subunit                                                                                                                                                                                                                                                             |
| SW:RLA0_HUMAN  | RPLP0  | 35 | 14 | 1.35 | 0.20 | SW:RLA0_HUMAN P05388 homo sapiens (human). 60s acidic ribosomal protein p0 (l10e). 5/2000 [MASS=34274]/Ribosomal protein P0, acidic phosphoprotein component of the large 60S ribosomal subunit; shows increased expression in hepatocellular and colon carcinomas                                                                                                                                                                                                                    |

|               |        |    |    |      |      |                                                                                                                                                                                                                                                                                                                                                                                                                                               |
|---------------|--------|----|----|------|------|-----------------------------------------------------------------------------------------------------------------------------------------------------------------------------------------------------------------------------------------------------------------------------------------------------------------------------------------------------------------------------------------------------------------------------------------------|
| SW:R27A_HUMAN | RPS27A | 35 | 3  | 1.38 | 0.38 | SW:R27A_HUMAN P14798 homo sapiens (human), and cavia porcellus (guinea pig). 40s ribosomal protein s27a. 5/2000 [MASS=9418]/Ribosomal protein S27a, component of the small ribosomal subunit, consists of ubiquitin at the N-terminus and ribosomal protein S27a at the C-terminus; overexpressed in colon and renal cancers                                                                                                                  |
| SW:R10A_HUMAN | RPL10A | 35 | 1  | 1.38 | 0.00 | SW:R10A_HUMAN P53025 homo sapiens (human). 60s ribosomal protein l10a (csa-19). 10/1996 [MASS=24859]/Ribosomal protein L10a, a component of the large 60S ribosomal subunit; expression in the thymus is downregulated by cyclosporin-A                                                                                                                                                                                                       |
| SW:EFTU_HUMAN | TUFM   | 35 | 8  | 1.41 | 0.11 | SW:EFTU_HUMAN P49411 homo sapiens (human). elongation factor tu, mitochondrial precursor (p43). 12/1998 [MASS=49542]/Tu translation elongation factor (mitochondrial), a putative translation elongation factor, may be involved in protein biosynthesis, upregulated in some tumors                                                                                                                                                          |
| SW:SYN_HUMAN  | NARS   | 35 | 4  | 1.42 | 0.19 | SW:SYN_HUMAN O43776 homo sapiens (human). asparaginyl-trna synthetase, cytoplasmic (ec 6.1.1.22) (asparagine-- trna ligase) (asnrns). 5/2000 [MASS=62943]/Asparaginyl-tRNA synthetase, a class II aminoacyl tRNA synthetase, aminoacylates its cognate tRNAs with asparagine for protein biosynthesis, acts as an autoantigen in patients with inflammatory myopathy in interstitial lung disease                                             |
| SW:IF39_HUMAN | EIF3S9 | 35 | 5  | 1.44 | 0.20 | SW:IF39_HUMAN P55884 homo sapiens (human). eukaryotic translation initiation factor 3 subunit 9 (eif-3 eta) (eif3 p116) (eif3 p110). 5/2000 [MASS=92492]/Eukaryotic translation initiation factor 3 subunit (EIF3 subunit eta), the 116 kDa subunit of the EIF3 complex that plays a role in protein synthesis initiation                                                                                                                     |
| SW:RL2A_HUMAN | RPL27A | 35 | 7  | 1.44 | 0.56 | SW:RL2A_HUMAN P46776 homo sapiens (human). 60s ribosomal protein l27a. 5/2000 [MASS=16430]/Ribosomal protein L27a, component of the large 60S ribosomal subunit; gene is abnormally expressed in colorectal carcinomas                                                                                                                                                                                                                        |
| SW:RSP4_HUMAN | LAMR1  | 35 | 7  | 1.44 | 0.05 | SW:RSP4_HUMAN P08865 homo sapiens (human). 40s ribosomal protein sa (p40) (34/67 kda laminin receptor) (colon carcinoma laminin-binding protein) (nem/1chd4). 5/2000 [MASS=32854]/Laminin receptor 1, a ribosomal protein of the small 40S ribosomal subunit, plays a role in cancer cell and basement membrane glycoprotein laminin interactions during tumor invasion and metastasis, expression correlates with cancer cell aggressiveness |
| SW:RL18_HUMAN | RPL18  | 35 | 5  | 1.49 | 0.46 | SW:RL18_HUMAN Q07020 homo sapiens (human). 60s ribosomal protein l18. 5/2000 [MASS=21503]/Ribosomal protein L18, a component of the large 60S ribosomal subunit, a negative regulator of double-stranded RNA-activated protein kinase (PKR) which is involved in control of protein synthesis initiation; gene expression increases in colon cancer                                                                                           |
| SW:RL3L_HUMAN | RPL3L  | 35 | 11 | 1.51 | 0.24 | SW:RL3L_HUMAN Q92901 homo sapiens (human). 60s ribosomal protein l3-like. 11/1997 [MASS=46165]/Ribosomal protein L3-like, a putative RNA-binding ribosome structural protein that plays a role in protein biosynthesis                                                                                                                                                                                                                        |
| SW:RS6_HUMAN  | RPS6   | 35 | 5  | 1.52 | 0.13 | SW:RS6_HUMAN P10660 homo sapiens (human), rattus norvegicus (rat), and mus musculus (mouse). 40s ribosomal protein s6 (phosphoprotein np33). 7/1998 [MASS=28681]/Ribosomal protein S6, structural component of the cytosolic small (40S) ribosomal subunit, functions in RNA binding and protein biosynthesis                                                                                                                                 |
| SW:IF34_HUMAN | EIF3S4 | 35 | 1  | 1.53 | 0.00 | SW:IF34_HUMAN O75821 homo sapiens (human). eukaryotic translation initiation factor 3 subunit 4 (eif-3 delta) (eif3 p44) (eif-3 rna-binding subunit) (eif3 p42). 5/2000 [MASS=35696]/Eukaryotic translation initiation factor 3 subunit 4 (delta 44kD), a component of the eIF-3 translation initiation complex which plays a role in formation of the 40S initiator complex containing methionyl-tRNA and 40S subunit, binds RNA             |
| SW:RL10_HUMAN | RPL10  | 35 | 14 | 1.53 | 1.04 | SW:RL10_HUMAN P27635 homo sapiens (human). 60s ribosomal protein l10 (qm protein) (tumor suppressor qm) (laminin receptor homolog). 5/2000 [MASS=24446]/Ribosomal protein L10, a component of the 60S ribosomal subunit; may be involved in the maintenance of the nontumorigenic phenotype in Wilms' microcell hybrid cells                                                                                                                  |
| SW:RL12_HUMAN | RPL12  | 35 | 35 | 1.62 | 0.58 | SW:RL12_HUMAN P30050 homo sapiens (human). 60s ribosomal protein l12. 7/1998 [MASS=17819]/Ribosomal protein L12, a likely RNA-binding structural component of the large 60S ribosomal subunit that plays a role in protein biosynthesis; autoantibodies to ribosomal protein L12 are associated with systemic lupus erythematosus                                                                                                             |
| SW:RL14_HUMAN | RPL14  | 35 | 23 | 1.63 | 0.47 | SW:RL14_HUMAN P50914 homo sapiens (human). 60s ribosomal protein l14 (cag-isl 7). 12/1998 [MASS=23158]/Ribosomal protein L14, a putative component of the large 60S ribosomal subunit; transcripts can contain either fixed or variable numbers of CAG triplet repeats depending on cell type                                                                                                                                                 |
| SW:RL17_HUMAN | RPL17  | 35 | 4  | 1.63 | 0.06 | SW:RL17_HUMAN P18621 homo sapiens (human). 60s ribosomal protein l17 (l23). 5/2000 [MASS=21397]/Ribosomal protein L17, an RNA-binding structural component of the large 60S ribosomal subunit that plays a role in protein biosynthesis                                                                                                                                                                                                       |
| SW:DDX1_HUMAN | DDX1   | 35 | 6  | 1.67 | 0.10 | SW:DDX1_HUMAN Q92499 homo sapiens (human). dead box protein 1 (dead box protein-retinoblastoma) (dbp-rb). 5/2000 [MASS=82432]/DEAD box protein 1, a member of the DEAD-H box ATP-dependent RNA helicase protein family, plays a role in the processing of pre-mRNAs, may interact with CSTF2; corresponding gene is coamplified with MYC in some neuroblastoma and retinoblastoma cell lines                                                  |
| SW:R37A_HUMAN | RPL37A | 35 | 2  | 1.69 | 0.23 | SW:R37A_HUMAN P12751 homo sapiens (human), rattus norvegicus (rat), and mus musculus (mouse). 60s ribosomal protein l37a. 2/1996 [MASS=10144]/Ribosomal protein L37a, component of the large 60S ribosomal subunit                                                                                                                                                                                                                            |
| SW:IF2B_HUMAN | EIF2S2 | 35 | 2  | 1.70 | 0.48 | SW:IF2B_HUMAN P20042 homo sapiens (human). eukaryotic translation initiation factor 2 beta subunit (eif-2-beta). 7/1999 [MASS=38400]/Eukaryotic translation initiation factor 2 subunit 2, the beta subunit of eIF2, a translation initiation factor, involved in the initiation of protein synthesis, binds GDP                                                                                                                              |
| SW:RL44_HUMAN | RPL44  | 35 | 4  | 1.80 | 0.47 | SW:RL44_HUMAN P09896 homo sapiens (human), rattus norvegicus (rat), mus musculus (mouse), and sus scrofa (pig). 60s ribosomal protein l44 (l36a). 7/1998 [MASS=12310]/Ribosomal protein L44, a component of the 60S ribosomal subunit; has very strong similarity to Rpl36a, which may be part of the peptidyl transferase center                                                                                                             |
| SW:RL40_HUMAN | UBA52  | 35 | 3  | 2.00 | 0.50 | SW:RL40_HUMAN P14793 homo sapiens (human), rattus norvegicus (rat), and gallus gallus (chicken). 60s ribosomal protein l40 (cep52). 11/1997 [MASS=61811]/Ubiquitin A-52 residue ribosomal protein fusion product 1, protein consisting of ubiquitin at the N-terminus and ribosomal protein L40 at the C-terminus; the corresponding gene is upregulated in colon cancer but not in gastric cancer                                            |

|                                     |       |    |    |      |      |                                                                                                                                                                                                                                                                                                                                                                                                                                                                             |
|-------------------------------------|-------|----|----|------|------|-----------------------------------------------------------------------------------------------------------------------------------------------------------------------------------------------------------------------------------------------------------------------------------------------------------------------------------------------------------------------------------------------------------------------------------------------------------------------------|
| SW:RL24_HUMAN                       | RPL24 | 35 | 6  | 2.02 | 0.10 | SW:RL24_HUMAN P38663 homo sapiens (human), rattus norvegicus (rat), and bos taurus (bovine). 60s ribosomal protein l24 (l30). 5/2000 [MASS=17779]/Ribosomal protein L24, a putative component of the 60S ribosomal subunit                                                                                                                                                                                                                                                  |
| SW:DDX6_HUMAN                       | DDX6  | 35 | 3  | 2.06 | 0.72 | SW:DDX6_HUMAN P26196 homo sapiens (human). probable atp-dependent rna helicase p54 (oncogene rck) (dead box protein 6). 7/1998 [MASS=54418]/DEAD box protein 6, a member of the DEAD/H box ATP-dependent RNA helicase protein family, may be involved in cell proliferation, upregulated in colorectal adenocarcinoma and colonic adenoma; gene is translocated in a diffuse large B-cell lymphoma                                                                          |
| SW:RS16_HUMAN                       | RPS16 | 35 | 8  | 2.18 | 0.76 | SW:RS16_HUMAN P17008 homo sapiens (human), and rattus norvegicus (rat). 40s ribosomal protein s16. 7/1999 [MASS=16314]/Ribosomal protein S16, putative component of the small 40S ribosomal subunit                                                                                                                                                                                                                                                                         |
| SW:RS20_HUMAN                       | RPS20 | 35 | 1  | 2.42 | 0.00 | SW:RS20_HUMAN P17075 homo sapiens (human), and rattus norvegicus (rat). 40s ribosomal protein s20. 5/2000 [MASS=13373]/Ribosomal protein S20, a putative component of the small 40S ribosomal subunit, may play a role in apoptosis                                                                                                                                                                                                                                         |
| SW:RS2_HUMAN                        | RPS2  | 35 | 7  | 2.46 | 1.54 | SW:RS2_HUMAN P15880 homo sapiens (human). 40s ribosomal protein s2 (s4) (llep3 protein). 10/1996 [MASS=31324]/Ribosomal protein S2, a putative component of the small 40S ribosomal subunit, may bind RNA, upregulated in squamous cell carcinoma and in breast and colon tumors                                                                                                                                                                                            |
| SW:IF4E_HUMAN                       | EIF4E | 35 | 1  | 2.94 | 0.00 | SW:IF4E_HUMAN P06730 homo sapiens (human). eukaryotic translation initiation factor 4e (eif-4e) (eif4e) (mrna cap-binding protein) (eif-4f 25 kda subunit). 5/2000 [MASS=25097]/Eukaryotic translation initiation factor 4E, a subunit of eIF4F, a mRNA cap-binding protein involved in translation initiation, a target of insulin dependent signaling pathway, expression is upregulated in breast carcinomas                                                             |
| <b>RNA Processing/Modifications</b> |       |    |    |      |      |                                                                                                                                                                                                                                                                                                                                                                                                                                                                             |
| SW:SYTC_HUMAN                       | TARS  | 37 | 4  | 0.51 | 0.06 | SW:SYTC_HUMAN P26639 homo sapiens (human). threonyl-trna synthetase, cytoplasmic (ec 6.1.1.3) (threonine--trna ligase) (thrrs). 6/1994 [MASS=82124]/Threonyl-tRNA synthetase, a class II aminoacyl tRNA synthetase which aminoacylates its cognate tRNAs with threonine for protein synthesis, autoantigen in several autoimmune disorders                                                                                                                                  |
| SW:SYG_HUMAN                        | GARS  | 37 | 1  | 0.69 | 0.00 | SW:SYG_HUMAN P41250 homo sapiens (human). glycyl-trna synthetase (ec 6.1.1.14) (glycine--trna ligase) (glyrs). 10/1996 [MASS=77531]/Glycyl-tRNA synthetase; functions in protein biosynthesis, aminoacylates its cognate tRNAs with phenylalanine/Glycyl-tRNA synthetase, a class II aminoacyl-tRNA synthetase that catalyzes aminoacylation of its cognate tRNA with glycine for protein biosynthesis; an autoantigen in dermatomyositis                                   |
| SW:SYD_HUMAN                        | DARS  | 37 | 4  | 0.77 | 0.15 | SW:SYD_HUMAN P14868 homo sapiens (human). aspartyl-trna synthetase (ec 6.1.1.12) (aspartate--trna ligase) (asprs). 11/1997 [MASS=57192]/Aspartyl-tRNA synthetase, a class II aminoacyl tRNA synthetase that aminoacylates its cognate tRNA with aspartate for protein biosynthesis, associates with a multisynthetase complex, N-terminus may aid interaction with elongation factor 1 alpha                                                                                |
| SW:SYA_HUMAN                        | AARS  | 37 | 1  | 0.83 | 0.00 | SW:SYA_HUMAN P49588 homo sapiens (human). alanyl-trna synthetase (ec 6.1.1.7) (alanine--trna ligase) (alars). 7/1998 [MASS=106801]/Alanyl-tRNA synthetase, aminoacylates its cognate tRNA with alanine for protein biosynthesis, acts as an autoantigen in patients with polymyositis                                                                                                                                                                                       |
| SW:SYR_HUMAN                        | RARS  | 37 | 7  | 0.84 | 0.08 | SW:SYR_HUMAN P54136 homo sapiens (human). arginyl-trna synthetase (ec 6.1.1.19) (arginine--trna ligase) (argrs). 5/2000 [MASS=74977]/Arginyl-tRNA synthetase, aminoacylates its cognate tRNAs with arginine for protein biosynthesis                                                                                                                                                                                                                                        |
| SW:SYM_HUMAN                        | MARS  | 37 | 9  | 0.87 | 0.18 | SW:SYM_HUMAN P56192 homo sapiens (human). methionyl-trna synthetase (ec 6.1.1.10) (methionine--trna ligase) (metrs). 12/1998 [MASS=101129]/Methionine-tRNA synthetase, putative tRNA synthetase that is predicted to aminoacylate its cognate tRNAs with methionine for protein biosynthesis, required for rRNA synthesis in the nucleolus                                                                                                                                  |
| SW:SYEP_HUMAN                       | EPRS  | 37 | 23 | 0.92 | 0.84 | SW:SYEP_HUMAN P07814 homo sapiens (human). multifunctional aminoacyl-trna synthetase [includes: glutamyl-trna synthetase (ec 6.1.1.17) (glutamate--trna ligase); prolyl-trna synthetase (ec 6.1.1.15) (pro [MASS=163026]/Glutamyl-prolyl-tRNA synthetase, a bifunctional enzyme with two functionally separable domains, one that aminoacylates prolyl-tRNA with proline and another that is believed to aminoacylate glutamyl-tRNA with glutamate for protein biosynthesis |
| SW:CST1_HUMAN                       | CSTF1 | 37 | 1  | 0.93 | 0.00 | SW:CST1_HUMAN Q05048 homo sapiens (human). cleavage stimulation factor, 50 kda subunit (cstf 50 kda subunit) (cf-1 50 kda subunit). 7/1998 [MASS=48358]/Cleavage stimulation factor subunit 1, the 50 kDa subunit of the cleavage stimulation factor complex required for pre-mRNA polyadenylation and 3'-end cleavage, interacts with BARD1 and the C-terminal domain of the RNA polymerase II large subunit                                                               |
| SW:SYQ_HUMAN                        | QARS  | 37 | 2  | 0.94 | 0.20 | SW:SYQ_HUMAN P47897 homo sapiens (human). glutaminyl-trna synthetase (ec 6.1.1.18) (glutamine--trna ligase) (glnr). 5/2000 [MASS=87799]/Glutamyl-tRNA synthetase, aminoacylates cognate tRNAs with glutamine for protein biosynthesis, also suppresses FAS (TNFRSF6)-mediated apoptosis by inhibiting ASK1 (MAP3K5) kinase activity, contains N-terminal appended and C-terminal catalytic domains                                                                          |
| SW:SYV_HUMAN                        | VARS2 | 37 | 4  | 0.95 | 0.14 | SW:SYV_HUMAN P26640 homo sapiens (human). valyl-trna synthetase (ec 6.1.1.9) (valine--trna ligase) (valrs). 2/1996 [MASS=140377]/Valyl-tRNA synthetase 2, a putative class I tRNA sythetase, predicted to function in aminoacylation of valyl tRNAs for protein biosynthesis                                                                                                                                                                                                |
| SW:SYK_HUMAN                        | KARS  | 37 | 7  | 1.01 | 0.18 | SW:SYK_HUMAN Q15046 homo sapiens (human). lysyl-trna synthetase (ec 6.1.1.6) (lysine--trna ligase) (lyrs) (kiaa0070). 7/1998 [MASS=68034]/Lysyl-tRNA synthetase, a class II aminoacyl tRNA synthetase, aminoacylates its cognate tRNAs with lysine for protein biosynthesis, packaged into HIV virions, exists as cytoplasmic and mitochondrial alternative forms                                                                                                           |
| SW:SYI_HUMAN                        | IARS  | 37 | 9  | 1.10 | 0.16 | SW:SYI_HUMAN P41252 homo sapiens (human). isoleucyl-trna synthetase, cytoplasmic (ec 6.1.1.5) (isoleucine--trna ligase) (ilers) (irs). 7/1999 [MASS=144959]/Isoleucine-tRNA synthetase, a class I aminoacyl tRNA synthetase, aminoacylates isoleucyl-tRNA with isoleucine for protein biosynthesis, acts as an autoantigen in some autoimmune diseases                                                                                                                      |

|                |         |    |    |      |      |                                                                                                                                                                                                                                                                                                                                                                                                                                                                          |
|----------------|---------|----|----|------|------|--------------------------------------------------------------------------------------------------------------------------------------------------------------------------------------------------------------------------------------------------------------------------------------------------------------------------------------------------------------------------------------------------------------------------------------------------------------------------|
| SW:NPM_HUMAN   | NPM1    | 37 | 3  | 1.11 | 0.14 | SW:NPM_HUMAN P06748 homo sapiens (human). nucleophosmin (npm) (nucleolar phosphoprotein b23) (numatrin) (nucleolar protein no38). 5/2000 [MASS=32575]/Nucleophosmin (numatrin), a nucleic acid-binding phosphoprotein involved in apoptosis, abundant in tumor cells; gene fusion with anaplastic lymphoma kinase (ALK) is detected in non-Hodgkin's lymphoma and fusion with MLF1 is seen in acute myeloid leukemia                                                     |
| SW:PCB1_HUMAN  | PCBP1   | 37 | 20 | 1.23 | 0.19 | SW:PCB1_HUMAN Q15365 homo sapiens (human). poly(rc)-binding protein 1 (hnnp-e1) (nucleic acid binding protein sub2.3) (alpha-cp1). 5/2000 [MASS=37526]/Poly(rC)-binding protein 1, contains KH RNA-binding domains, binds poly(rC) RNA, acts as a translational repressor and plays a role in mRNA stability                                                                                                                                                             |
| SWN:SYFB_HUMAN | FRSB    | 37 | 4  | 1.25 | 0.44 | SWN:SYFB_HUMAN Q9nsd9 homo sapiens (human). phenylalanyl-trna synthetase beta chain (ec 6.1.1.20) (phenylalanine--trna ligase beta chain) (phers) (protein hscp173). 8/2001 [MASS=66130]/Phenylalanyl-tRNA synthetase beta-subunit, regulatory subunit that forms heterodimers with the catalytic alpha subunit (FARSL), involved in protein synthesis, may play a role in tumorigenic events                                                                            |
| GP:AB020880_1  | SART3   | 37 | 5  | 1.37 | 0.17 | GP:AB020880_1 Homo sapiens mRNA for squamous cell carcinoma antigen SART-3, complete cds; squamous cell carcinoma antigen recognized by T cells. [MASS=109935]/Squamous cell carcinoma antigen recognized by T-cells 3, a snRNA binding protein that functions in spliceosome reassembly, acts as a tumor antigen recognized by cytotoxic T lymphocytes, may be a target for immunotherapy in a number of cancers                                                        |
| SW:ROF_HUMAN   | HNRPF   | 37 | 3  | 1.37 | 0.10 | SW:ROF_HUMAN P52597 homo sapiens (human). heterogeneous nuclear ribonucleoprotein f (hnnp f). 11/1997 [MASS=45672]/Heterogeneous nuclear ribonucleoprotein F, an RNA binding protein which contains quasi-RRMs (RNA recognition motifs) and plays a role in pre-mRNA splicing                                                                                                                                                                                            |
| PIR2:T13159    | E1B-AP5 | 37 | 3  | 1.38 | 0.41 | PIR2:T13159 E1B-55kDa-associated protein - human [MASS=95810]/E1B-55kDa-associated protein 5, a heterogeneous nuclear ribonucleoprotein involved in nucleocytoplasmic transport of adenovirus and cellular mRNAs, binds adenovirus early 1B (E1B-55 kD) protein and may regulate viral oncogenic transformation                                                                                                                                                          |
| SW:SYN_HUMAN   | NARS    | 37 | 4  | 1.42 | 0.19 | SW:SYN_HUMAN O43776 homo sapiens (human). asparaginyl-trna synthetase, cytoplasmic (ec 6.1.1.22) (asparagine--trna ligase) (asnrs). 5/2000 [MASS=62943]/Asparaginyl-tRNA synthetase, a class II aminoacyl tRNA synthetase, aminoacylates its cognate tRNAs with asparagine for protein biosynthesis, acts as an autoantigen in patients with inflammatory myopathy in interstitial lung disease                                                                          |
| PIR2:T02673    | HNRPR   | 37 | 3  | 1.43 | 0.18 | no_description_avail/Heterogeneous nuclear ribonucleoprotein R, a putative pre-mRNA processing protein that contains three RNA recognition domains and an RGG domain, interacts with survival motor neuron protein and is an autoantigen in autoimmune disease                                                                                                                                                                                                           |
| GP:AF037448_1  | NSAP1   | 37 | 4  | 1.45 | 0.22 | GP:AF037448_1 Homo sapiens RRM RNA binding protein Gry-rbp (GRY-RBP) mRNA, complete cds; RRM RNA binding protein; Glycine, arginine and tyrosine-rich at C-terminus. [MASS=69633]/NS1 associated protein 1, component of the ApoB mRNA editosome involved in apolipoprotein B (APOB) mRNA editing, may bind RNA, may play a role in the regulation of mRNA splicing or transport from the nucleus                                                                        |
| SW:ROK_HUMAN   | HNRPK   | 37 | 6  | 1.51 | 0.30 | SW:ROK_HUMAN Q07244 homo sapiens (human), and rattus norvegicus (rat). heterogeneous nuclear ribonucleoprotein k (hnnp k) (dc-stretch binding protein) (csbp) (transformation upregulated nuclear protein [MASS=50976]/Heterogeneous nuclear ribonucleoprotein K, a transcription factor which binds to poly(C) of RNA and DNA and is involved in RNA processing, gene transcription and translational controls, may induce apoptosis and play a role in viral infection |
| SW:FBRL_HUMAN  | FBL     | 37 | 1  | 1.53 | 0.00 | SW:FBRL_HUMAN P22087 homo sapiens (human). fibrillarin (34 kda nucleolar scleroderma antigen). 7/1999 [MASS=33818]/Fibrillarin, a nucleolar RNA-binding protein that is involved in ribosomal RNA processing; recognized by antisera from patients with scleroderma autoimmune disease, systemic sclerosis, and other connective tissue diseases                                                                                                                         |
| SW:SMD3_HUMAN  | SNRPD3  | 37 | 1  | 1.55 | 0.00 | SW:SMD3_HUMAN P43331 homo sapiens (human). small nuclear ribonucleoprotein sm d3 (snrp core protein d3) (sm-d3). 10/1996 [MASS=13916]/Small nuclear ribonucleoprotein D3, part of a multimeric complex involved in biogenesis of snRNPs and mRNA splicing, interacts with the spinal muscular atrophy disease protein (SMN); autoantigen for antibodies associated with systemic lupus erythematosus                                                                     |
| SW:ROA0_HUMAN  | HNRPA0  | 37 | 2  | 1.64 | 0.40 | SW:ROA0_HUMAN Q13151 homo sapiens (human). heterogeneous nuclear ribonucleoprotein a0 (hnnp a0). 5/2000 [MASS=30841]/Heterogeneous nuclear ribonucleoprotein A0, has triplet repeats, two consensus sequence-type RNA-binding domains, and a glycine-rich auxiliary domain, found in low abundance hnRNP complexes                                                                                                                                                       |
| SW:ROH1_HUMAN  | HNRPH1  | 37 | 4  | 1.66 | 0.22 | SW:ROH1_HUMAN P31943 homo sapiens (human). heterogeneous nuclear ribonucleoprotein h (hnnp h). 11/1997 [MASS=49229]/Heterogeneous nuclear ribonucleoprotein H1, a pre-mRNA splicing factor that is a component of a complex that mediates post-transcriptional processing of primary transcripts                                                                                                                                                                         |
| SW:DDX1_HUMAN  | DDX1    | 37 | 6  | 1.67 | 0.10 | SW:DDX1_HUMAN Q92499 homo sapiens (human). dead box protein 1 (dead box protein-retinoblastoma) (dbp-rb). 5/2000 [MASS=82432]/DEAD box protein 1, a member of the DEAD-H box ATP-dependent RNA helicase protein family, plays a role in the processing of pre-mRNAs, may interact with CSTF2; corresponding gene is coamplified with MYC in some neuroblastoma and retinoblastoma cell lines                                                                             |
| PIR2:JW0079    | HNRPDL  | 37 | 1  | 1.72 | 0.00 | PIR2:JW0079 heterogeneous nuclear ribonucleoprotein homolog JKTBP [imported] - human [MASS=33589]/Heterogeneous nuclear ribonucleoprotein D-like, an RNA- and DNA-binding protein that may play a role in mRNA biogenesis                                                                                                                                                                                                                                                |
| SW:PCB2_HUMAN  | PCBP2   | 37 | 10 | 1.73 | 0.20 | SW:PCB2_HUMAN Q15366 homo sapiens (human). poly(rc)-binding protein 2 (hnnp-e2). 5/2000 [MASS=38580]/Poly(rC)-binding protein 2, poly(rC) and poly(U)-binding protein, involved in the translational regulation of poliovirus, papillomavirus, and hepatitis C virus transcripts                                                                                                                                                                                         |

|               |          |    |    |      |      |                                                                                                                                                                                                                                                                                                                                                                                                                                                             |
|---------------|----------|----|----|------|------|-------------------------------------------------------------------------------------------------------------------------------------------------------------------------------------------------------------------------------------------------------------------------------------------------------------------------------------------------------------------------------------------------------------------------------------------------------------|
| GP:AC003972_1 | RENT1    | 37 | 1  | 1.74 | 0.00 | GP:AC003972_1 Homo sapiens DNA from chromosome 19, cosmid R33485 containing pNORF1, complete sequence; human type 1 RNA helicase; DPS similarity to (U59323) type 1 RNA helicase pNORF1 [Homo sapiens]; Score. [MASS=123036]/regulator of nonsense transcripts 1 (nonsense mrna reducing factor 1) (norf1) (up-frameshift suppressor 1 homolog). 10/2001 [MASS=124345]                                                                                      |
| SW:RUXF_HUMAN | SNRPF    | 37 | 1  | 1.76 | 0.00 | SW:RUXF_HUMAN Q15356 homo sapiens (human). small nuclear ribonucleoprotein f (snrnp-f) (sm protein f). 7/1999 [MASS=9725]/Sm protein F, a spliceosomal snRNA-associated Sm core protein that is involved in the biogenesis of the snRNPs; a target of autoantibodies in patients with the autoimmune disease systemic lupus erythematosus                                                                                                                   |
| GP:AF177344_1 | FLJ10581 | 37 | 1  | 1.89 | 0.00 | GP:AF177344_1 Homo sapiens clone HC90 unknown mRNA. [MASS=30998]/ weakly similar to a methyltransferase/Member of the RNA methyltransferase family, which catalyze 2'-O-methylation of ribose groups in R                                                                                                                                                                                                                                                   |
| PIR2:I55595   | RNPC2    | 37 | 1  | 1.92 | 0.00 | PIR2:I55595 splicing factor - human [MASS=58657]/Splicing factor CC1.3, a novel nuclear protein and putative member of the SR family of alternative splicing factors; target of autoantibodies from a patient with hepatocellular carcinoma                                                                                                                                                                                                                 |
| SW:ROA3_HUMAN | FBRNP    | 37 | 2  | 1.93 | 0.06 | SW:ROA3_HUMAN P51991 homo sapiens (human). heterogeneous nuclear ribonucleoprotein a3 (hnrap a3) (fbrnp) (d10s102). 7/1999 [MASS=39686]/Protein with similarity to heterogeneous ribonucleoproteins, contains RRM (RNA recognition motif) domains                                                                                                                                                                                                           |
| SW:SMD2_HUMAN | SNRPD2   | 37 | 2  | 2.02 | 0.82 | SW:SMD2_HUMAN P43330 homo sapiens (human). small nuclear ribonucleoprotein sm d2 (snrnp core protein d2) (sm-d2). 10/1996 [MASS=13527]/Small nuclear ribonucleoprotein D2 polypeptide, one of seven common core snRNP proteins involved in snRNP biogenesis and pre-mRNA splicing, autoantigen for anti-Sm antibodies produced by individuals with systemic lupus erythematosus                                                                             |
| SW:U2AF_HUMAN | U2AF65   | 37 | 1  | 2.05 | 0.00 | SW:U2AF_HUMAN P26368 homo sapiens (human). splicing factor u2af 65 kda subunit (u2 auxiliary factor 65 kda subunit) (u2 snrnp auxiliary factor large subunit). 12/1998 [MASS=53501]/U2 small nuclear ribonucleoprotein auxiliary factor (65 kDa), a component of U2 small nucleoprotein auxiliary factor, which is necessary for mRNA splicing, binds to pre-mRNA                                                                                           |
| GP:D21163_1   | U5-116KD | 37 | 1  | 2.11 | 0.00 | GP:D21163_1 Human mRNA for KIAA0031 gene, complete cds; similar to human elongation factor 2 mRNA (HSEF2).. [MASS=109436]/U5 snRNP-specific protein 116 kD, a spliceosome component with GTPase activity, plays a role in mRNA splicing and processing                                                                                                                                                                                                      |
| SW:RU17_HUMAN | SNRP70   | 37 | 3  | 2.11 | 0.26 | SW:RU17_HUMAN P08621 homo sapiens (human). u1 small nuclear ribonucleoprotein 70 kda (u1 snrnp 70 kda) (snrp70). 11/1995 [MASS=70081]/U1 small nuclear 70 kDa ribonucleoprotein, involved in pre mRNA splicing, acts as an autoantigen in systemic lupus erythematosus and mixed connective tissue disease                                                                                                                                                  |
| PIR2:A54601   | HNRPD    | 37 | 9  | 2.17 | 0.65 | PIR2:A54601 RNA-binding protein AUF1 - human [MASS=31200]/Heterogeneous nuclear ribonucleoprotein D (AU-rich element RNA-binding protein 1 37kD), an RNA and DNA-binding protein which binds to AU-rich elements in the 3' untranslated regions of mRNAs and mediates their degradation                                                                                                                                                                     |
| SW:NHPX_HUMAN | NHP2L1   | 37 | 2  | 2.21 | 0.20 | SW:NHPX_HUMAN P55769 homo sapiens (human). nhp2/rs6 family protein yel026w homolog (high mobility group-like nuclear protein 2 homolog) (otk27). 5/2000 [MASS=14174]/Non-histone chromosome protein 2 (S. cerevisiae)-like 1, a member of a family of RNP-associated proteins, a component of the spliceosome and rRNA processing machinery, recognizes a shared stem-internal loop-stem structure in its RNA targets                                       |
| SW:DDX5_HUMAN | DDX5     | 37 | 1  | 2.27 | 0.00 | SW:DDX5_HUMAN P17844 homo sapiens (human). probable rna-dependent helicase p68 (dead-box protein p68) (dead box protein 5). 7/1998 [MASS=69148]/DEAD/H (Asp-Glu-Ala-Asp/His) box polypeptide 5 (RNA helicase 68kD), a ATP-dependent RNA helicase that has ATP-independent RNA renaturation activity and catalyses branch migration, binds estrogen receptor alpha and function as a transcriptional coactivator                                             |
| SW:U2AG_HUMAN | U2AF35   | 37 | 2  | 2.34 | 0.02 | SW:U2AG_HUMAN Q01081 homo sapiens (human). splicing factor u2af 35 kda subunit (u2 auxiliary factor 35 kda subunit) (u2 snrnp auxiliary factor small subunit). 12/1998 [MASS=27872]/U2(RNU2) small nuclear RNA auxiliary factor 1, functions as a pre-mRNA splicing protein, involved in the functional recognition of the 3' splice site AG dinucleotide, interacts with ZNF265 protein involved in alternative splicing                                   |
| SW:ROU_HUMAN  | HNRPU    | 37 | 29 | 2.48 | 0.62 | SW:ROU_HUMAN Q00839 homo sapiens (human). heterogenous nuclear ribonucleoprotein u (hnrap u) (scaffold attachment factor a) (saf-a). 5/2000 [MASS=90479]/Heterogeneous nuclear ribonucleoprotein U (scaffold attachment factor A), binds RNA, binds EP300 in a complex that binds scaffold-matrix attachment regions of TOP1, involved in chromatin structure, apoptosis, and perhaps RNA processing and transcription                                      |
| SW:ROA1_HUMAN | HNRPA1   | 37 | 11 | 2.48 | 0.85 | SW:ROA1_HUMAN P09651 homo sapiens (human). heterogeneous nuclear ribonucleoprotein a1 (helix-destabilizing protein) (single-strand binding protein) (hnrap core protein a1). 11/1997 [MASS=38715]/Heterogeneous nuclear ribonucleoprotein A1, an RNA-binding protein involved in mRNA splicing and translational control, undergoes nucleocytoplasmic shuttling possibly for mRNA export and telomerase recruitment; an autoantigen in autoimmune disorders |
| SW:DD17_HUMAN | DDX17    | 37 | 1  | 2.58 | 0.00 | SW:DD17_HUMAN Q92841 homo sapiens (human). probable rna-dependent helicase p72 (dead-box protein p72) (dead box protein 17). 5/2000 [MASS=72371]/DEAD H box protein 17, a member of the DEAD box family of RNA-dependent ATPases and ATP-dependent RNA helicases, a component of an estrogen receptor alpha (ESR) transcriptional coactivator complex                                                                                                       |
| SW:Y017_HUMAN | SF3B3    | 37 | 7  | 2.63 | 0.59 | SW:Y017_HUMAN Q15393 homo sapiens (human). hypothetical protein kiaa0017. 5/2000 [MASS=44606]/ Homo sapiens mRNA for SAP 130 spliceosomal protein/Splicing factor 3b subunit 3, a component of the U2 snRNP-associated protein complex SF3b that plays a role in spliceosome assembly, interacts with STAGA and TFTC complexes implicated in DNA repair, chromatin modification, and transcription                                                          |



|                            |          |    |    |      |      |                                                                                                                                                                                                                                                                                                                                                                                                                                                            |
|----------------------------|----------|----|----|------|------|------------------------------------------------------------------------------------------------------------------------------------------------------------------------------------------------------------------------------------------------------------------------------------------------------------------------------------------------------------------------------------------------------------------------------------------------------------|
| SW:NR54_HUMAN              | NONO     | 37 | 2  | 3.38 | 1.09 | SW:NR54_HUMAN Q15233 homo sapiens (human). 54 kda nuclear rna-binding protein (p54(nrb)) (p54nrb) (55 kda nuclear protein) (nmt55). 5/2000 [MASS=54232]/Non-POU-domain-containing octamer-binding nuclear protein, binds DNA and RNA, and implicated in transcription and pre-mRNA splicing; a fusion partner with TFE3 in papillary renal cell carcinoma                                                                                                  |
| SW:SFR7_HUMAN              | SFRS7    | 37 | 2  | 3.66 | 0.49 | SW:SFR7_HUMAN Q16629 homo sapiens (human). splicing factor, arginine/serine-rich 7 (splicing factor 9g8). 5/2000 [MASS=27367]/Splicing factor arginine serine rich 7, a splicing factor of the SR protein family containing an RNA binding domain (RBD) and a serine/arginine (SR) domain that is implicated in alternative pre-mRNA splicing                                                                                                              |
| <b>RNA Splicing</b>        |          |    |    |      |      |                                                                                                                                                                                                                                                                                                                                                                                                                                                            |
| GP:AF037448_1              | NSAP1    | 38 | 4  | 1.45 | 0.22 | GP:AF037448_1 Homo sapiens RRM RNA binding protein Gry-rbp (GRY-RBP) mRNA, complete cds; RRM RNA binding protein; Glycine, arginine and tyrosine-rich at C-terminus. [MASS=69633]/NS1 associated protein 1, component of the ApoB mRNA editosome involved in apolipoprotein B (APOB) mRNA editing, may bind RNA, may play a role in the regulation of mRNA splicing or transport from the nucleus                                                          |
| SW:SMD3_HUMAN              | SNRPD3   | 38 | 1  | 1.55 | 0.00 | SW:SMD3_HUMAN P43331 homo sapiens (human). small nuclear ribonucleoprotein sm d3 (snrnp core protein d3) (sm-d3). 10/1996 [MASS=13916]/Small nuclear ribonucleoprotein D3, part of a multimeric complex involved in biogenesis of snRNPs and mRNA splicing, interacts with the spinal muscular atrophy disease protein (SMN); autoantigen for antibodies associated with systemic lupus erythematosus                                                      |
| SW:RUXF_HUMAN              | SNRPF    | 38 | 1  | 1.76 | 0.00 | SW:RUXF_HUMAN Q15356 homo sapiens (human). small nuclear ribonucleoprotein f (snrnp-f) (sm protein f). 7/1999 [MASS=9725]/Sm protein F, a spliceosomal snRNA-associated Sm core protein that is involved in the biogenesis of the snRNPs; a target of autoantibodies in patients with the autoimmune disease systemic lupus erythematosus                                                                                                                  |
| PIR2:T09073                | SFRS2IP  | 38 | 1  | 1.89 | 0.00 | PIR2:T09073 splicing factor Sip1 - human [MASS=128875]/Splicing factor arginine serine rich 2 interacting protein, a SR domain family protein that interacts with the RNA polymerase II C-terminal domain and several splicing factors, is essential in mRNA splicing and possibly spliceosome A-complex formation                                                                                                                                         |
| PIR2:I55595                | RNPC2    | 38 | 1  | 1.92 | 0.00 | PIR2:I55595 splicing factor - human [MASS=58657]/Splicing factor CC1.3, a novel nuclear protein and putative member of the SR family of alternative splicing factors; target of autoantibodies from a patient with hepatocellular carcinoma                                                                                                                                                                                                                |
| SW:SMD2_HUMAN              | SNRPD2   | 38 | 2  | 2.02 | 0.82 | SW:SMD2_HUMAN P43330 homo sapiens (human). small nuclear ribonucleoprotein sm d2 (snrnp core protein d2) (sm-d2). 10/1996 [MASS=13527]/Small nuclear ribonucleoprotein D2 polypeptide, one of seven common core snRNP proteins involved in snRNP biogenesis and pre-mRNA splicing, autoantigen for anti-Sm antibodies produced by individuals with systemic lupus erythematosus                                                                            |
| SW:U2AF_HUMAN              | U2AF65   | 38 | 1  | 2.05 | 0.00 | SW:U2AF_HUMAN P26368 homo sapiens (human). splicing factor u2af 65 kda subunit (u2 auxiliary factor 65 kda subunit) (u2 snrnp auxiliary factor large subunit). 12/1998 [MASS=53501]/U2 small nuclear ribonucleoprotein auxiliary factor (65 kDa), a component of U2 small nucleoprotein auxiliary factor, which is necessary for mRNA splicing, binds to pre-mRNA                                                                                          |
| GP:D21163_1                | U5-116KD | 38 | 1  | 2.11 | 0.00 | GP:D21163_1 Human mRNA for KIAA0031 gene, complete cds; similar to human elongation factor 2 mRNA (HSEF2).. [MASS=109436]/U5 snRNP-specific protein 116 kD, a spliceosome component with GTPase activity, plays a role in mRNA splicing and processing                                                                                                                                                                                                     |
| SW:RU17_HUMAN              | SNRP70   | 38 | 3  | 2.11 | 0.26 | SW:RU17_HUMAN P08621 homo sapiens (human). u1 small nuclear ribonucleoprotein 70 kda (u1 snrnp 70 kda) (snrp70). 11/1995 [MASS=70081]/U1 small nuclear 70 kDa ribonucleoprotein, involved in pre mRNA splicing, acts as an autoantigen in systemic lupus erythematosus and mixed connective tissue disease                                                                                                                                                 |
| SW:U2AG_HUMAN              | U2AF35   | 38 | 2  | 2.34 | 0.02 | SW:U2AG_HUMAN Q01081 homo sapiens (human). splicing factor u2af 35 kda subunit (u2 auxiliary factor 35 kda subunit) (u2 snrnp auxiliary factor small subunit). 12/1998 [MASS=27872]/U2(RNU2) small nuclear RNA auxiliary factor 1, functions as a pre-mRNA splicing protein, involved in the functional recognition of the 3' splice site AG dinucleotide, interacts with ZNF265 protein involved in alternative splicing                                  |
| SW:ROA1_HUMAN              | HNRPA1   | 38 | 11 | 2.48 | 0.85 | SW:ROA1_HUMAN P09651 homo sapiens (human). heterogeneous nuclear ribonucleoprotein a1 (helix-destabilizing protein) (single-strand binding protein) (hnmp core protein a1). 11/1997 [MASS=38715]/Heterogeneous nuclear ribonucleoprotein A1, an RNA-binding protein involved in mRNA splicing and translational control, undergoes nucleocytoplasmic shuttling possibly for mRNA export and telomerase recruitment; an autoantigen in autoimmune disorders |
| SW:Y017_HUMAN              | SF3B3    | 38 | 7  | 2.63 | 0.59 | SW:Y017_HUMAN Q15393 homo sapiens (human). hypothetical protein k1aa0017. 5/2000 [MASS=44606]/ Homo sapiens mRNA for SAP 130 spliceosomal protein/Splicing factor 3b subunit 3, a component of the U2 snRNP-associated protein complex SF3b that plays a role in spliceosome assembly, interacts with STAGA and TFTC complexes implicated in DNA repair, chromatin modification, and transcription                                                         |
| SW:NR54_HUMAN              | NONO     | 38 | 2  | 3.38 | 1.09 | SW:NR54_HUMAN Q15233 homo sapiens (human). 54 kda nuclear rna-binding protein (p54(nrb)) (p54nrb) (55 kda nuclear protein) (nmt55). 5/2000 [MASS=54232]/Non-POU-domain-containing octamer-binding nuclear protein, binds DNA and RNA, and implicated in transcription and pre-mRNA splicing; a fusion partner with TFE3 in papillary renal cell carcinoma                                                                                                  |
| SW:SFR7_HUMAN              | SFRS7    | 38 | 2  | 3.66 | 0.49 | SW:SFR7_HUMAN Q16629 homo sapiens (human). splicing factor, arginine/serine-rich 7 (splicing factor 9g8). 5/2000 [MASS=27367]/Splicing factor arginine serine rich 7, a splicing factor of the SR protein family containing an RNA binding domain (RBD) and a serine/arginine (SR) domain that is implicated in alternative pre-mRNA splicing                                                                                                              |
| <b>Vesicular Transport</b> |          |    |    |      |      |                                                                                                                                                                                                                                                                                                                                                                                                                                                            |

|                |          |    |    |      |      |                                                                                                                                                                                                                                                                                                                                                                                                                                                   |
|----------------|----------|----|----|------|------|---------------------------------------------------------------------------------------------------------------------------------------------------------------------------------------------------------------------------------------------------------------------------------------------------------------------------------------------------------------------------------------------------------------------------------------------------|
| SW:SNAG_HUMAN  | NAPG     | 43 | 2  | 0.43 | 0.31 | SW:SNAG_HUMAN Q99747 homo sapiens (human). gamma-soluble nsf attachment protein (snap-gamma). 7/1999 [MASS=34746]/N-ethylmaleimide-sensitive factor (NSF) attachment protein gamma, member of a family of proteins involved in membrane fusion during exocytosis, may have roles in platelet exocytosis and in the attachment of mitochondria to the cytoskeleton                                                                                 |
| GP:AB018298_1  | SEC24D   | 43 | 1  | 0.47 | 0.00 | sec24-related protein D (human)/Protein with high similarity to SEC24 (S. cerevisiae) related gene family member C (human SEC24C), which is a putative COPII vesicle coat protein that forms a complex with Sec23Ap (human SEC23) and functions in ER-Golgi transport                                                                                                                                                                             |
| SW:RB3B_HUMAN  | RAB3B    | 43 | 2  | 0.50 | 0.00 | SW:RB3B_HUMAN P20337 homo sapiens (human). ras-related protein rab-3b. 10/1994 [MASS=24760]/Ras-related GTP-binding protein 3b, a GTP-binding protein and GTPase that is involved in exocytosis                                                                                                                                                                                                                                                   |
| SW:ADG_HUMAN   | ADTG     | 43 | 4  | 0.51 | 0.13 | SW:ADG_HUMAN O43747 homo sapiens (human). gamma-adaptin (golgi adaptor ha1/ap1 adaptin gamma subunit) (clathrin assembly protein complex 1 gamma large chain). 7/1999 [MASS=91592]/Adaptor-related protein complex 1 gamma 1 subunit, promotes the formation of clathrin coated vesicles and pits for intracellular transport; deletion of the corresponding gene occurs in Wilm's tumor, prostate adenocarcinomas, and hepatocellular carcinomas |
| SW:LDLR_HUMAN  | LDLR     | 43 | 3  | 0.55 | 0.04 | SW:LDLR_HUMAN P01130 homo sapiens (human). low-density lipoprotein receptor precursor (ldl receptor). 5/2000 [MASS=95376]/Low density lipoprotein receptor, mediates uptake of low density lipoproteins, involved in lipid metabolism; gene variations are associated with familial hypercholesterolemia, hypertension, atherosclerosis, and coronary artery disease                                                                              |
| SW:RB4A_HUMAN  | RAB4A    | 43 | 1  | 0.56 | 0.00 | SW:RB4A_HUMAN P20338 homo sapiens (human). ras-related protein rab-4a. 10/1996 [MASS=23902]/GTP-binding protein, a member of the rab family of proteins, involved in early endosome trafficking and receptor recycling                                                                                                                                                                                                                            |
| PIR2:A53016    | MYO5A    | 43 | 1  | 0.58 | 0.00 | PIR2:A53016 myosin heavy chain VA - human (fragment) [MASS=96052]/Class V myosin (Myosin), a member of the myosin family of proteins, a motor protein that may be involved in vesicle transport and epidermal differentiation; mutation of the corresponding gene is associated with Griscelli syndrome                                                                                                                                           |
| SW:EGFR_HUMAN  | EGFR     | 43 | 2  | 0.62 | 0.00 | SW:EGFR_HUMAN P00533 homo sapiens (human). epidermal growth factor receptor precursor (ec 2.7.1.112). 12/1998 [MASS=134277]/Epidermal growth factor receptor, a receptor protein tyrosine kinase that binds epidermal growth factor (EGF) and transforming growth factor alpha (TGFA), involved in cell proliferation and differentiation, implicated in tumor invasion and metastasis                                                            |
| SW:STB3_HUMAN  | STXBP3   | 43 | 6  | 0.66 | 0.15 | SW:STB3_HUMAN O00186 homo sapiens (human). syntaxin binding protein 3 (unc-18 homolog 3) (unc-18c) (unc-18-3). 5/2000 [MASS=67574]/Syntaxin binding protein 3, binds syntaxin 4 (STX4), predicted to be involved in vesicle transport and docking and in neurotransmitter release                                                                                                                                                                 |
| SW:CLH2_HUMAN  | CLTCL1   | 43 | 10 | 0.66 | 0.15 | SW:CLH2_HUMAN P53675 homo sapiens (human). clathrin heavy chain 2 (clh-22). 5/2000 [MASS=187030]/Clathrin heavy polypeptide-like 1, may play roles in vesicle budding and in cytoskeleton-dependent trans-Golgi network membrane sorting; gene is among those deleted in velocardiofacial and DiGeorge syndromes, and is a fusion partner with ALK in lymphoma                                                                                    |
| SW:S23B_HUMAN  | SEC23B   | 43 | 1  | 0.69 | 0.00 | SW:S23B_HUMAN Q15437 homo sapiens (human). protein transport protein sec23 homolog isoform b. 11/1997 [MASS=86470]/Member of the SEC23 family of vesicle trafficking proteins                                                                                                                                                                                                                                                                     |
| GP:AF038535_1  | SYT7     | 43 | 1  | 0.70 | 0.00 | GP:AF038535_1 Homo sapiens synaptotagmin VII mRNA, partial cds; similar to rat synaptotagmin VII. [MASS=47195]/Very strongly similar to synaptotagmin 7 (Rn.10193); may be a phospholipid-binding calcium sensor protein                                                                                                                                                                                                                          |
| SW:KINH_HUMAN  | KIF5B    | 43 | 2  | 0.73 | 0.05 | SW:KINH_HUMAN P33176 homo sapiens (human). kinesin heavy chain (ubiquitous kinesin heavy chain) (ukhc). 7/1999 [MASS=109685]/Kinesin family member 5B (kinesin heavy chain), a microtubule-associated motor protein that may function in intracellular organelle transport and may play a role in susceptibility and resistance                                                                                                                   |
| SW:RB35_HUMAN  | RAB35    | 43 | 1  | 0.73 | 0.00 | SW:RB35_HUMAN Q15286 homo sapiens (human). ras-related protein rab-35 (rab-1c) (gtp-binding protein ray). 5/2000 [MASS=23025]/Ras-related GTP-binding protein 35, member of the Rab family of GTP-binding proteins, may function in vesicular transport                                                                                                                                                                                           |
| GPN:AB047846_1 | LOC51137 | 43 | 7  | 0.74 | 0.24 | SW:COPG_HUMAN Q9y678 homo sapiens (human). coatomer gamma subunit (gamma-coat protein) (gamma-cop). 10/2001 [MASS=97718]/Coatomer protein complex subunit gamma 1, a subunit of the coat of COP I-coated vesicles, predicted to be involved in retrograde Golgi to endoplasmic reticulum transport, contains two clathrin-associated adaptin N-terminal domains                                                                                   |
| SW:SN23_HUMAN  | SNAP23   | 43 | 2  | 0.74 | 0.06 | SW:SN23_HUMAN O00161 homo sapiens (human). synaptosomal associated protein 23 (snap-23) (vesicle-membrane fusion protein snap-23). 5/2000 [MASS=23354]/Synaptosomal-associated protein 23, a member of the SNARE family of proteins that regulate membrane fusion during exocytosis, a t-SNARE that binds to syntaxins and is involved in docking and fusion of transport vesicles during exocytosis                                              |
| SW:RB3D_HUMAN  | RAB3D    | 43 | 1  | 0.74 | 0.00 | SW:RB3D_HUMAN O95716 homo sapiens (human). ras-related protein rab-3d. 5/2000 [MASS=24267]/Ras-related GTP-binding protein 3d, putative small monomeric GTP-binding protein and GTPase that plays a role in regulated secretion                                                                                                                                                                                                                   |
| SW:RAB2_HUMAN  | RAB2     | 43 | 5  | 0.77 | 0.05 | SW:RAB2_HUMAN P08886 homo sapiens (human), and canis familiaris (dog). ras-related protein rab-2. 10/1994 [MASS=23546]/Ras-related GTP-binding protein 2, a GTPase which plays a role in vesicle transport from the ER to the Golgi complex; overexpression in nonmalignant peripheral blood lymphocytes is associated with Searzy syndrome                                                                                                       |
| SW:GBAK_HUMAN  | GNAI3    | 43 | 4  | 0.77 | 0.10 | SW:GBAK_HUMAN P08754 homo sapiens (human). guanine nucleotide-binding protein g(k), alpha subunit (g(i) alpha-3). 11/1997 [MASS=40401]/G protein alpha i3 subunit, a component of pertussis toxin sensitive heterotrimeric G protein complexes, transduces signals from G protein-coupled receptors to intracellular effectors, inhibits forskolin-stimulated cAMP production                                                                     |

|               |         |    |    |      |      |                                                                                                                                                                                                                                                                                                                                                                                                                                                                              |
|---------------|---------|----|----|------|------|------------------------------------------------------------------------------------------------------------------------------------------------------------------------------------------------------------------------------------------------------------------------------------------------------------------------------------------------------------------------------------------------------------------------------------------------------------------------------|
| GP:AF091079_1 | YKT6    | 43 | 1  | 0.78 | 0.00 | GP:AF091079_1 Homo sapiens clone 560 SNARE protein Ykt6 mRNA, partial cds. [MASS=21607]/Homolog of <i>S. cerevisiae</i> Ykt6p, which is a v-SNARE required for ER to Golgi transport, likely involved in trafficking proteins from the ER to the Golgi                                                                                                                                                                                                                       |
| SW:CLH1_HUMAN | CLTC    | 43 | 49 | 0.78 | 0.44 | SW:CLH1_HUMAN Q00610 homo sapiens (human). clathrin heavy chain 1 (clh-17) (k1aa0034). 5/2000 [MASS=191615]/Clathrin heavy polypeptide c, involved in endocytosis, may bind to endocytic proteins through an LLDLD consensus sequence, interacts with huntingtin interacting protein 1 (HIP1), amino terminus folds into a seven-bladed beta-propeller                                                                                                                       |
| GP:AJ131245_1 | SEC24B  | 43 | 1  | 0.81 | 0.00 | GP:AJ131245_1 Homo sapiens mRNA for Sec24 protein (Sec24B isoform). [MASS=137789]/SEC24 related gene family member B, a member of the SEC24 family of vesicle trafficking proteins, interacts with SEC23A, predicted to be localized to COPII-coated vesicles and to be involved in the export of proteins from the endoplasmic reticulum                                                                                                                                    |
| SW:DYN2_HUMAN | DNM2    | 43 | 1  | 0.81 | 0.00 | SW:DYN2_HUMAN P50570 homo sapiens (human). dynamin 2. 10/1996 [MASS=98018]/Dynamin II, member of a family of 100-kD guanosine triphosphatases, regulates budding of endocytic vesicles at the plasma membrane and may function in the formation of transport vesicles at the trans-Golgi                                                                                                                                                                                     |
| GP:D31886_1   | RAB3GAP | 43 | 3  | 0.83 | 0.11 | GP:D31886_1 Human mRNA for KIAA0066 gene, partial cds. [MASS=110524]/RAB3 GTPase-activating protein, GTPase-activating protein specific for lipid-modified members of the Rab3 subfamily, may influence calcium-dependent exocytosis of synaptic vesicles                                                                                                                                                                                                                    |
| SW:CALX_HUMAN | CANX    | 43 | 4  | 0.84 | 0.04 | SW:CALX_HUMAN P27824 homo sapiens (human). calnexin precursor (major histocompatibility complex class i antigen-binding protein p88) (p90) (ip90). 11/1995 [MASS=67568]/Calnexin, a calcium and lectin binding protein that functions as a chaperone in the endoplasmic reticulum, involved in protein folding and secretion, mediates retention of misfolded proteins in the endoplasmic reticulum                                                                          |
| SW:ER53_HUMAN | LMAN1   | 43 | 2  | 0.84 | 0.00 | SW:ER53_HUMAN P49257 homo sapiens (human). ergic-53 protein precursor (er-golgi intermediate compartment 53 kda protein) (gp58) (mr60) (lectin, mannose-binding 1). 7/1998 [MASS=57563]/Mannose-binding lectin 1, involved in the traffic of glycoproteins between endoplasmic reticulum and the Golgi apparatus; mutations of the corresponding gene is associated with combined factor V and VIII coagulation deficiency                                                   |
| GP:U45976_1   | PICALM  | 43 | 1  | 0.85 | 0.00 | GP:U45976_1 Human clathrin assembly protein lymphoid myeloid leukemia (CALM) mRNA, complete cds. [MASS=70695]/Phosphatidylinositol binding clathrin assembly protein, binds to clathrin heavy chain (CLTC) and plays a role in coated pit internalization; rearrangements in the corresponding gene are associated with acute lymphoblastic and acute myeloid leukemias                                                                                                      |
| SW:ADB_HUMAN  | AP2B1   | 43 | 5  | 0.86 | 0.14 | SW:ADB_HUMAN P21851 homo sapiens (human), <i>rattus norvegicus</i> (rat), and <i>bos taurus</i> (bovine). beta-adaptin (plasma membrane adaptor ha2/ap2 adaptin beta subunit) (clathrin assembly protein complex 2 beta [MASS=104553]/Adaptor-related protein complex 2 beta 1 subunit, a large subunit of the AP2 adaptor complex, involved in clathrin coat assembly at the plasma membrane; may bind to the transmembrane envelope protein of HIV-1 and HTLV retroviruses |
| SW:MPRI_HUMAN | IGF2R   | 43 | 76 | 0.86 | 0.21 | SW:MPRI_HUMAN P11717 homo sapiens (human). cation-independent mannose-6-phosphate receptor precursor (ci man-6-p receptor) (ci-mpr) (insulin-like growth factor ii receptor) (300 kda mannose 6-phosphate [MASS=274309]/Insulin-like growth factor II receptor, functions in transport of mannose 6-phosphate-containing lysosomal enzymes and IGF-II maturation and clearance, mediates granzyme B-induced apoptosis, putative tumor suppressor                             |
| GP:AF044670_1 | VAP33   | 43 | 2  | 0.88 | 0.24 | GP:AF044670_1 Homo sapiens 33 kDa Vamp-associated protein (VAP33) mRNA, complete cds; VAP-33. [MASS=27318]/Vesicle-associated membrane protein (VAMP)-associated protein A, binds v-SNAREs, t-SNAREs, VAPB, and VAMP, predicted to be involved in vesicle transport and fusion                                                                                                                                                                                               |
| GP:AF128536_1 | PACSIN2 | 43 | 4  | 0.89 | 0.45 | GP:AF128536_1 Homo sapiens cytoplasmic phosphoprotein PACSIN2 mRNA, complete cds; related to PACSIN1; contains CDC15 N-terminal domain, 3 EH domain-binding NPF motifs, and a C-terminal SH3 domain. [MASS=55905]/Protein kinase C and casein kinase substrate in neurons 2, member of the PACSIN family of cytoplasmic adapter proteins, may function to organize the actin cytoskeleton and regulate vesicular traffic                                                     |
| GP:AF004563_1 | STXBP1  | 43 | 4  | 0.89 | 0.26 | GP:AF004563_1 Homo sapiens hUNC18b alternatively-spliced mRNA, complete cds; alternatively-spliced; similar to rat n-Sec1. [MASS=68736]/Syntaxin-binding protein 1, binds syntaxins, may be involved in synaptic vesicle exocytosis                                                                                                                                                                                                                                          |
| SW:G25B_HUMAN | CDC42   | 43 | 13 | 0.90 | 0.13 | SW:G25B_HUMAN P21181 homo sapiens (human), <i>mus musculus</i> (mouse), and <i>bos taurus</i> (bovine). g25k gtp-binding protein, brain isoform (gp) (cdc42 homolog). 12/1998 [MASS=21311]/Cell division cycle 42 (GTP binding protein 25kD), Rho GTPase involved in actin cytoskeleton organization, cell migration, cell cycle progression and apoptosis, downregulated in fibroblasts and macrophages from patients with Tangiers disease                                 |
| SW:143T_HUMAN | YWHAQ   | 43 | 3  | 0.91 | 0.05 | SW:143T_HUMAN P27348 homo sapiens (human). 14-3-3 protein tau (14-3-3 protein theta) (14-3-3 protein t-cell) (hs1 protein). 11/1997 [MASS=27764]/14-3-3 theta (14-3-3 tau in T-cells), may modulate T-cell signaling and cytokine expression through interaction with and inhibition of protein kinase C and phosphatidylinositol 3-kinase, may promote cell survival during amyotrophic lateral sclerosis (ALS)                                                             |
| SW:ACTZ_HUMAN | ACTR1A  | 43 | 7  | 0.92 | 0.04 | SW:ACTZ_HUMAN P42024 homo sapiens (human), <i>mus musculus</i> (mouse), and <i>canis familiaris</i> (dog). alpha-centractin (centractin) (centrosome-associated actin homolog) (actin-rpv) (arp1). 7/1999 [MASS=42614]/Actin-related protein 1, a component of the dynactin complex involved in transport along microtubules, associates with centrophilin NUMA1 at nuclear envelope breakdown, expression is significantly reduced in Down syndrome fetal brain             |

|                |          |    |    |      |      |                                                                                                                                                                                                                                                                                                                                                                                                                                                                         |
|----------------|----------|----|----|------|------|-------------------------------------------------------------------------------------------------------------------------------------------------------------------------------------------------------------------------------------------------------------------------------------------------------------------------------------------------------------------------------------------------------------------------------------------------------------------------|
| SWN:STX8_HUMAN | STX8     | 43 | 1  | 0.93 | 0.00 | SWN:STX8_HUMAN Q9unk0 homo sapiens (human). syntaxin 8. 8/2001 [MASS=26907]/Syntaxin 8, member of the soluble NSF attachment protein receptor (SNARE) family, plays a role in endosome trafficking, may mediate vesicle docking and fusion, may regulate CFTR -mediated chloride currents                                                                                                                                                                               |
| GP:AC005545_2  | AP3D1    | 43 | 2  | 0.93 | 0.18 | GP:AC005545_2 Homo sapiens chromosome 19, cosmid R26634, complete sequence; vesicle coat component, similar to alpha and gamma adaptins. [MASS=121170]/Adaptor-related protein complex 3 delta 1 subunit, a component of the AP-3 complex, involved in intracellular vesicle transport                                                                                                                                                                                  |
| SW:S23A_HUMAN  | SEC23A   | 43 | 5  | 0.94 | 0.18 | SW:S23A_HUMAN Q15436 homo sapiens (human). protein transport protein sec23 homolog isoform a. 11/1997 [MASS=86147]/Sec23 homolog A, a putative intracellular transporter that plays a role in protein trafficking, interacts with SEC24B and SEC24C                                                                                                                                                                                                                     |
| SW:ADB1_HUMAN  | AP1B1    | 43 | 20 | 0.99 | 0.27 | SW:ADB1_HUMAN Q10567 homo sapiens (human). beta-adaptin 1 (plasma membrane adaptor ha2/ap2 adaptin beta subunit) (clathrin assembly protein complex 2 beta large chain) (ap105a). 7/1999 [MASS=104607]/Adaptor-related protein complex 1 beta 1, likely participates in clathrin-coated vesicle endocytosis and intracellular receptor transport; loss is associated with meningioma tumors                                                                             |
| SW:TERA_HUMAN  | VCP      | 43 | 41 | 0.99 | 0.20 | SW:TERA_HUMAN P55072 homo sapiens (human). transitional endoplasmic reticulum atpase (ter atpase) (15s mg(2+)-atpase p97 subunit) (valosin containing protein) (vcp) [contains: valosin]. 7/1999 [MASS=89322]/Valosin-containing protein, a putative clathrin-binding ATPase involved in cell cycle control, ubiquitin-dependent protein degradation, and JAK-STAT signaling, may be involved in DNA repair via BRCA1, may be involved in receptor-mediated endocytosis |
| GP:AC006942_1  | ADTAA    | 43 | 5  | 1.00 | 0.28 | GP:AC006942_1 Homo sapiens chromosome 19, cosmid R31181, complete sequence CLATHRIN ASSEMBLY PROTEIN COMPLEX 2 ALPHA-A LARGE CHAIN); Non- consensussplice junction found at position 18996. [MASS=90046]/Adaptor-related protein complex 2 alpha 1 subunit, component of the clathrin adaptor complex, involved in vesicle transport                                                                                                                                    |
| GP:AF020797_1  | HSMU1B   | 43 | 1  | 1.03 | 0.00 | GP:AF020797_1 Homo sapiens AP-mu chain family member mu1B (HSMU1B) mRNA, complete cds. [MASS=48108]/Adaptor-related protein complex 1 mu 2 subunit, involved in protein sorting                                                                                                                                                                                                                                                                                         |
| SW:MPRD_HUMAN  | M6PR     | 43 | 1  | 1.03 | 0.00 | SW:MPRD_HUMAN P20645 homo sapiens (human). cation-dependent mannose-6-phosphate receptor precursor (cd man-6-p receptor) (cd-mpr) (46 kda mannose 6-phosphate receptor) (mpr 46). 5/2000 [MASS=30993]/Cation-dependent mannose-6-phosphate receptor, involved in intracellular sorting and transport of acid hydrolases, transports lysosomal enzymes                                                                                                                   |
| GP:AC006378_1  | BET1     | 43 | 1  | 1.04 | 0.00 | GP:AC006378_1 Homo sapiens BAC clone RP11-45519 from 7q21.2-q22, complete sequence; match to AAB62941.1 (PID:2253426); H_NH0455109.1. [MASS=13289]/S. cerevisiae Bet1 homolog, may be involved in ER to Golgi transport                                                                                                                                                                                                                                                 |
| PIR2:I53171    | H-SP1    | 43 | 1  | 1.06 | 0.00 | PIR2:I53171 pantophysin - human [MASS=28565]/Synaptophysin-like protein (pantophysin), a protein that has similarity to the synaptic vesicle protein synaptophysin (SYP), may play a role in vesicle transport                                                                                                                                                                                                                                                          |
| GP:AF260566_1  | HGS      | 43 | 1  | 1.06 | 0.00 | GP:AF260566_1 Homo sapiens hepatocyte growth factor-regulated tyrosine kinase substrate HRS isoform 2 (HRS) mRNA, complete cds. [MASS=76362]/Hepatocyte growth factor regulated tyrosine kinase substrate, zinc-finger protein with ATPase activity, tyrosine phosphorylated upon growth factor stimulation, involved in endosome trafficking and mediates FOS transcription via cytokine signaling                                                                     |
| SW:COPB_HUMAN  | COPB     | 43 | 1  | 1.07 | 0.00 | SW:COPB_HUMAN P53618 homo sapiens (human). coatomer beta subunit (beta-coat protein) (beta-cop) (fragment). 11/1997 [MASS=33444]/Coatomer protein beta, component of non-clathrin-coated vesicles essential for membrane trafficking, binds to HIV-1 Nef protein                                                                                                                                                                                                        |
| SWN:SNX3_HUMAN | SNX3     | 43 | 1  | 1.07 | 0.00 | SWN:SNX3_HUMAN O60493 homo sapiens (human). sorting nexin 3 (sdp3 protein). 8/2001 [MASS=18762]/Sorting nexin 3, involved in intracellular protein trafficking                                                                                                                                                                                                                                                                                                          |
| SW:ARF6_HUMAN  | ARF6     | 43 | 2  | 1.07 | 0.05 | SW:ARF6_HUMAN P26438 homo sapiens (human), mus musculus (mouse), and rattus norvegicus (rat). adp-ribosylation factor 6. 12/1998 [MASS=19951]/ADP-ribosylation factor 6, GTP-binding protein that stimulates cholera toxin activity and is involved in endocytosis, exocytosis, membrane trafficking, and possibly regulation of glucose transport                                                                                                                      |
| GP:AF151858_1  | LOC50999 | 43 | 2  | 1.09 | 0.01 | GP:AF151858_1 Homo sapiens CGI-100 protein mRNA, complete cds. [MASS=26005]/Protein with high similarity to T1-ST2 receptor binding protein (human IL1RL1LG), which binds to the T1/ST2 receptor (human IL1RL1), member of the emp24 family, which are involved in protein transport from endoplasmic reticulum to Golgi                                                                                                                                                |
| GP:AF032922_1  | UNC-18C  | 43 | 2  | 1.09 | 0.03 | GP:AF032922_1 Homo sapiens syntaxin 4 binding protein UNC-18c (UNC-18c) mRNA, complete cds. [MASS=67764]/Syntaxin binding protein 3, binds syntaxin 4 (STX4), predicted to be involved in vesicle transport and docking and in neurotransmitter release                                                                                                                                                                                                                 |
| SW:STB2_HUMAN  | STXBP2   | 43 | 4  | 1.09 | 0.34 | SW:STB2_HUMAN Q15833 homo sapiens (human). syntaxin binding protein 2 (unc-18 homolog 2) (unc-18b). 5/2000 [MASS=66439]/Syntaxin-binding protein 2, a member of the Sec1 family of proteins involved in synaptic transmission and secretion, may be involved in intracellular vesicular transport                                                                                                                                                                       |
| SW:AP50_HUMAN  | AP2M1    | 43 | 3  | 1.10 | 0.08 | SW:AP50_HUMAN P20172 homo sapiens clathrin coat assembly protein ap50 (clathrin coat associated protein ap50) (plasma membrane adaptor ap-2 50 kda protein) (ha2 50 kda subunit) (clathrin assembly protei [MASS=49655]/Medium chain subunit of the clathrin associated protein complex AP2, involved in vesicle transport, endocytosis, and required for V-ATPase complex activity                                                                                     |
| SW:NSF_HUMAN   | NSF      | 43 | 6  | 1.12 | 0.16 | SW:NSF_HUMAN P46459 homo sapiens (human). vesicular-fusion protein nsf (n-ethylmaleimide-sensitive fusion protein) (nem-sensitive fusion protein). 12/1998 [MASS=82654]/N-ethylmaleimide-sensitive factor, an ATPase involved in membrane fusion during exocytosis                                                                                                                                                                                                      |
| GPN:AB047847_1 | COPG2    | 43 | 5  | 1.14 | 0.06 | no_description_avail/Coatomer protein complex subunit gamma 2, putative intracellular transporter that may be involved in non-selective vesicle transport                                                                                                                                                                                                                                                                                                               |

|                |         |    |    |      |      |                                                                                                                                                                                                                                                                                                                                                                                                                                                        |
|----------------|---------|----|----|------|------|--------------------------------------------------------------------------------------------------------------------------------------------------------------------------------------------------------------------------------------------------------------------------------------------------------------------------------------------------------------------------------------------------------------------------------------------------------|
| SW:COPP_HUMAN  | COPB2   | 43 | 5  | 1.15 | 0.22 | SW:COPP_HUMAN P35606 homo sapiens (human). coatomer beta' subunit (beta'-coat protein) (beta'-cop) (p102). 12/1998 [MASS=102356]/Coatomer protein (COP) complex subunit beta 2 (COP beta prime), part of a Golgi coatomer complex that comprises the coat of non-clathrin coated vesicles, likely to play a role in exocytosis                                                                                                                         |
| SW:RAB7_HUMAN  | RAB7    | 43 | 1  | 1.16 | 0.00 | SW:RAB7_HUMAN P51149 homo sapiens (human). ras-related protein rab-7. 7/1998 [MASS=23490]/Ras-related GTP-binding protein 7, a member of the rab family of proteins that is involved in vesicle transport, membrane fusion, and vacuole formation; implicated in Chediak Higashi Syndrome                                                                                                                                                              |
| GP:AB019435_1  | P125    | 43 | 3  | 1.17 | 0.10 | GP:AB019435_1 Homo sapiens mRNA for putative phospholipase, complete cds; putative. [MASS=111076]/Sec23-interacting protein p125, a proline rich protein containing a phospholipase motif, binds to the COPII vesicle coat protein Sec23p (mouse Sec23a), may play a role in protein transport between the endoplasmic reticulum and Golgi                                                                                                             |
| GP:U85946_1    | SEC10L1 | 43 | 5  | 1.33 | 0.11 | GP:U85946_1 Homo sapiens brain secretory protein hSec10p (HSEC10) mRNA, complete cds; similar to S. cerevisiae Sec10p. [MASS=81853]/SEC10 (S. cerevisiae)-like 1, a component of the exocyst complex, involved in the synthesis and delivery of secretory proteins in epithelial cells, involved in the development of epithelial cysts and tubules                                                                                                    |
| GPN:AF191298_1 | VPS35   | 43 | 7  | 1.35 | 0.49 | Homo sapiens, vacuolar protein sorting 35/Maternal-embryonic 3, may be a component of the sorting machinery required for vesicle to Golgi retrieval                                                                                                                                                                                                                                                                                                    |
| PIR2:S33377    | CKAP4   | 43 | 5  | 1.35 | 0.22 | PIR2:S33377 P63 protein - human [MASS=65793]/Cytoskeleton-associated protein 4, type II membrane protein of the endoplasmic reticulum, binds to microtubules and links them to the endoplasmic reticulum, promotes tubulin polymerization and endoplasmic reticulum reorganization                                                                                                                                                                     |
| SW:TM21_HUMAN  | TMP21   | 43 | 3  | 1.37 | 0.60 | SW:TM21_HUMAN P49755 homo sapiens (human). transmembrane protein tmp21 precursor (s31iii125) (s31i125). 12/1998 [MASS=24976]/Transmembrane protein Mr 21,000, involved in biosynthetic protein transport from the ER to Golgi, regulates Rac-GTP levels through interaction with beta 2-chimaerin (CHN2); corresponding gene is located in the AD3 region mutated in Alzheimer's Disease                                                               |
| SWN:CNE3_HUMAN | CPN3    | 43 | 28 | 1.47 | 0.27 | SWN:CNE3_HUMAN O75131 homo sapiens (human). copine iii. 8/2001 [MASS=60131]/Copine III, a member of the copine family of phospholipid binding proteins, contains C2 and integrin A domains, may play a role in membrane trafficking, displays protein kinase activity, however, it does not contain a traditional kinase catalytic domain                                                                                                              |
| SW:RB13_HUMAN  | RAB13   | 43 | 1  | 1.49 | 0.00 | SW:RB13_HUMAN P51153 homo sapiens (human). ras-related protein rab-13. 12/1998 [MASS=22774]/Ras-related GTP-binding protein 13, a putative RAB small monomeric GTPase that is likely to play a role in intracellular protein trafficking and cell adhesion                                                                                                                                                                                             |
| SW:GDIB_HUMAN  | GDI2    | 43 | 2  | 1.70 | 0.01 | SW:GDIB_HUMAN P50395 homo sapiens (human). rab gdp dissociation inhibitor beta (rab gdi beta) (gdi-2). 7/1998 [MASS=50664]/Guanosine diphosphate dissociation inhibitor 2, one of a family proteins that regulate GDP/GTP cycle and are involved in intracellular vesicular trafficking, associates with RAB1B, RAB5 and RAB6 and may play a role in their intracellular targeting                                                                     |
| PIR2:I53799    | KTN1    | 43 | 2  | 1.73 | 0.08 | PIR2:I53799 CG1 protein - human [MASS=149611]/human kinectin/Kinectin, functions as a receptor for the microtubule-motor protein kinesin and plays a role in intracellular movement of organelles; mutations in the corresponding gene are associated with childhood papillary thyroid carcinoma                                                                                                                                                       |
| PIR2:A55575    | ANK3    | 43 | 9  | 1.85 | 0.18 | PIR2:A55575 ankyrin 3, long splice form - human [MASS=480403]/Ankyrin 3 (ankyrin G), may link integral membrane proteins to the cytoskeleton, may play a role in localizing sodium channels to the axonal initial segment and nodes of Ranvier, may play a role in vesicle transport                                                                                                                                                                   |
| SW:COPA_HUMAN  | COPA    | 43 | 15 | 1.95 | 3.01 | SW:COPA_HUMAN P53621 homo sapiens (human). coatomer alpha subunit (alpha-coat protein) (alpha-cop) (hepcop) (hepcop) [contains: xenin (xenopsin-related peptide); proxenin]. 5/2000 [MASS=138332]/ Coatomer protein complex subunit alpha, involved in transport between the endoplasmic reticulum and the Golgi apparatus, binds to RNA, N-terminal 25 amino acids may be cleaved to release the peptide xenin, which stimulates pancreatic secretion |

Panel 10, pgs. 270-274

| Metabolic Pathways                             | AccessID      | Gene  | Cellular Process | Gravy Index | XPRESS Count | d0:d8 ratio | d0:d8 StdDev | Description                                                                                                                                                                                                                                                                                                                                                                                                                                                                        |
|------------------------------------------------|---------------|-------|------------------|-------------|--------------|-------------|--------------|------------------------------------------------------------------------------------------------------------------------------------------------------------------------------------------------------------------------------------------------------------------------------------------------------------------------------------------------------------------------------------------------------------------------------------------------------------------------------------|
| <b>TCA Cycle</b>                               |               |       |                  |             |              |             |              |                                                                                                                                                                                                                                                                                                                                                                                                                                                                                    |
| Pyruvate dehydrogenase complex                 | SW:ODPB_HUMAN | PDHB  | 5, 18            |             | 1            | 1.05        | 0.00         | SW:ODPB_HUMAN P11177 homo sapiens (human). pyruvate dehydrogenase e1 component beta subunit, mitochondrial precursor (ec 1.2.4.1) (pdhe1-b). 7/1999 [MASS=39219]/E1 beta subunit of pyruvate dehydrogenase complex, oxidatively decarboxylates pyruvate to acetyl-CoA                                                                                                                                                                                                              |
|                                                | SW:ODPA_HUMAN | PDHA1 | 5                |             | 3            | 1.17        | 0.41         | SW:ODPA_HUMAN P08559 homo sapiens (human). pyruvate dehydrogenase e1 component alpha subunit, somatic form, mitochondrial precursor (ec 1.2.4.1) (pdhe1-a type i). 7/1999 [MASS=43296]/E1 alpha subunit of pyruvate dehydrogenase complex, somatic form, oxidatively decarboxylates pyruvate to acetyl-CoA; mutation of the corresponding gene causes the majority of pyruvate dehydrogenase deficiencies                                                                          |
|                                                | SW:ODPX_HUMAN | PDX1  | 5                |             | 3            | 1.24        | 0.16         | SW:ODPX_HUMAN O00330 homo sapiens (human). pyruvate dehydrogenase protein x component, mitochondrial precursor (dihydrolipoamide dehydrogenase-binding protein of pyruvate dehydrogenase complex) (e3-bind [MASS=54138]/Dihydrolipoamide dehydrogenase-binding protein (protein X), lipoyl-containing component of the pyruvate dehydrogenase complex, anchors the dihydrolipoamide dehydrogenase (E3) to the dihydrolipoamide transacetylase (E2) core, deficiency causes disease |
|                                                | SW:DLDH_HUMAN | DLD   | 5, 18            |             | 10           | 1.59        | 0.59         | SW:DLDH_HUMAN P09622 homo sapiens (human). dihydrolipoamide dehydrogenase, mitochondrial precursor (ec 1.8.1.4). 5/2000 [MASS=54150]/Dihydrolipoamide dehydrogenase, E3 component of pyruvate dehydrogenase complex, also component of alpha-ketoglutarate dehydrogenase and branched-chain alpha-ketoacid dehydrogenase complexes and the glycine cleavage system                                                                                                                 |
| Citrate Synthase                               | SW:CISY_HUMAN | CS    | 5, 18            |             | 1            | 1.62        | 0.00         | SW:CISY_HUMAN O75390 homo sapiens (human). citrate synthase, mitochondrial precursor (ec 4.1.3.7). 7/1999 [MASS=51706]/Citrate synthase, converts acetyl-CoA and oxaloacetate into citrate plus CoA in the tricarboxylic acid cycle                                                                                                                                                                                                                                                |
| Aconitase                                      | SW:ACON_HUMAN | ACO2  | 5, 18            |             | 1            | 1.27        | 0.00         | SW:ACON_HUMAN Q99798 homo sapiens (human). aconitate hydratase, mitochondrial precursor (ec 4.2.1.3) (citrate hydrolyase) (aconitase). 5/2000 [MASS=85425]/Aconitase 2 mitochondrial (aconitate hydratase), catalyzes the conversion of citrate to cis-aconitate in the tricarboxylic acid cycle, may be involved in iron homeostasis; deficiency may be associated with lifelong exercise intolerance                                                                             |
| Isocitrate dehydrogenase                       | SW:IDHP_HUMAN | IDH2  | 5, 18            | -0.391      | 7            | 2.04        | 0.65         | SW:IDHP_HUMAN P48735 homo sapiens (human). isocitrate dehydrogenase [nadp], mitochondrial precursor (ec 1.1.1.42) (oxalosuccinate decarboxylase) (idh) (nadp+-specific icdh) (idp) (icd-m). 2/1996 [MASS=50948]/Isocitrate dehydrogenase 2 (NADP+) mitochondrial, catalyzes the oxidative decarboxylation of isocitrate to form alpha-ketoglutarate                                                                                                                                |
| alpha-ketoglutarate dehydrogenase              | SW:ODO1_HUMAN | OGDH  | 5, 18            |             | 9            | 0.94        | 0.18         | SW:ODO1_HUMAN Q02218 homo sapiens (human). 2-oxoglutarate dehydrogenase e1 component, mitochondrial precursor (ec 1.2.4.2) (alpha-ketoglutarate dehydrogenase). 7/1999 [MASS=113475]/2-Oxoglutarate dehydrogenase (alpha-ketoglutarate dehydrogenase), E1 component of the complex that converts alpha-ketoglutarate to succinyl coenzyme A in the Krebs cycle; deficiency has been observed in Alzheimer and Parkinson disease                                                    |
| Succinyl CoA synthase                          | NI            |       |                  |             |              |             |              |                                                                                                                                                                                                                                                                                                                                                                                                                                                                                    |
| Succinate dehydrogenase                        | SW:DHSB_HUMAN | SDHB  | 5, 18            | -0.410      | 1            | 2.24        | 0.00         | SW:DHSB_HUMAN P21912 homo sapiens (human). succinate dehydrogenase [ubiquinone] iron-sulfur protein, mitochondrial precursor (ec 1.3.5.1) (ip) (ip subunit of complex ii). 5/2000 [MASS=31629]/Succinate dehydrogenase complex iron sulfur subunit B, part of an enzyme complex that transports electrons from succinate to ubiquinone in the TCA cycle and aerobic respiratory chain, may be involved in familial pheochromocytoma                                                |
|                                                | SW:DHSA_HUMAN | SDHA  | 5, 18            | -0.270      | 5            | 2.48        | 0.32         | SW:DHSA_HUMAN P31040 homo sapiens (human). succinate dehydrogenase [ubiquinone] flavoprotein subunit, mitochondrial precursor (ec 1.3.5.1) (fp) (flavoprotein subunit of complex ii). 5/2000 [MASS=72692]/Succinate dehydrogenase complex subunit A (flavoprotein), transports electrons from succinate to ubiquinone in the TCA cycle and respiratory chain; gene mutation is associated with Leigh syndrome, which is a complex II respiratory chain deficiency                  |
| Malate dehydrogenase                           | SW:MDHM_HUMAN | MDH2  | 18               | 0.151       | 27           | 2.29        | 1.04         | SW:MDHM_HUMAN P40926 homo sapiens (human). malate dehydrogenase, mitochondrial precursor (ec 1.1.1.37). 5/2000 [MASS=35531]/Mitochondrial malate dehydrogenase, part of the malate-aspartate shuttle where it putatively catalyzes the oxidation of malate to oxaloacetate                                                                                                                                                                                                         |
| <b>Glycerol 3-phosphate shuttle</b>            |               |       |                  |             |              |             |              |                                                                                                                                                                                                                                                                                                                                                                                                                                                                                    |
| Mitochondrial glycerol 3-phosphate             | SW:GPDM_HUMAN | GPD2  | 5                | -0.211      | 1            | 3.30        | 0.00         | SW:GPDM_HUMAN P43304 homo sapiens (human). glycerol-3-phosphate dehydrogenase, mitochondrial precursor (ec 1.1.99.5) (gpd-m) (gpdh-m). 5/2000 [MASS=80815]/Mitochondrial glycerol-3-phosphate dehydrogenase, component of the glycerol phosphate shuttle; mutation of the calcium binding domain in the corresponding gene has been found in a patient with type A diabetes                                                                                                        |
| <b>Malate-aspartate shuttle</b>                |               |       |                  |             |              |             |              |                                                                                                                                                                                                                                                                                                                                                                                                                                                                                    |
| Cytosolic malate dehydrogenase                 | SW:MDHC_HUMAN | MDH1  | 18               |             | 4            | 1.27        | 0.10         | SW:MDHC_HUMAN P40925 homo sapiens (human). malate dehydrogenase, cytoplasmic (ec 1.1.1.37). 5/2000 [MASS=36295]/Cytosolic malate dehydrogenase, part of the malate-aspartate shuttle where it putatively catalyzes the reduction of oxaloacetate to malate                                                                                                                                                                                                                         |
| Mitochondrial malate dehydrogenase             | SW:MDHM_HUMAN | MDH2  | 18               | 0.151       | 27           | 2.29        | 1.04         | SW:MDHM_HUMAN P40926 homo sapiens (human). malate dehydrogenase, mitochondrial precursor (ec 1.1.1.37). 5/2000 [MASS=35531]/Mitochondrial malate dehydrogenase, part of the malate-aspartate shuttle where it putatively catalyzes the oxidation of malate to oxaloacetate                                                                                                                                                                                                         |
| <b>Mitochondrial Fatty Acid beta-oxidation</b> |               |       |                  |             |              |             |              |                                                                                                                                                                                                                                                                                                                                                                                                                                                                                    |
| Lipoprotein Lipase                             | NI            |       |                  |             |              |             |              |                                                                                                                                                                                                                                                                                                                                                                                                                                                                                    |
| Fatty acid Coenzyme A Ligase                   | SW:LCFA_HUMAN | FACL1 | 19               |             | 14           | 0.81        | 0.13         | SW:LCFA_HUMAN P41215 homo sapiens (human). long-chain-fatty-acid-coa ligase 1 (ec 6.2.1.3) (long-chain acyl-coa synthetase 1) (lacs 1) (palmitoyl-coa ligase). 10/1996 [MASS=78348]/Long chain fatty acid-Coenzyme A ligase (palmitoyl-CoA ligase), a member of the long chain acyl-CoA synthetase family required for lipid synthesis and fatty acid degradation                                                                                                                  |
| Carnitine acyltransferase                      | SW:CPT1_HUMAN | CPT1A | 18, 19           |             | 1            | 1.30        | 0.00         | SW:CPT1_HUMAN P50416 homo sapiens (human). carnitine o-palmitoyltransferase i, mitochondrial liver isoform (ec 2.3.1.21) (cpt i) (cptl-i). 7/1999 [MASS=88429]/Liver carnitine palmitoyltransferase I, enzyme of long-chain fatty acid beta-oxidation pathway; mutations in the corresponding gene are associated with carnitine palmitoyltransferase I deficiency                                                                                                                 |

|                                              |                |         |            |        |    |      |      |                                                                                                                                                                                                                                                                                                                                                                                                                                                                                  |
|----------------------------------------------|----------------|---------|------------|--------|----|------|------|----------------------------------------------------------------------------------------------------------------------------------------------------------------------------------------------------------------------------------------------------------------------------------------------------------------------------------------------------------------------------------------------------------------------------------------------------------------------------------|
|                                              | SW:CPT2_HUMAN  | CPT2    | 18, 19, 42 |        | 1  | 1.08 | 0.00 | SW:CPT2_HUMAN P23786 homo sapiens (human). carnitine o-palmitoyltransferase ii, mitochondrial precursor (ec 2.3.1.21) (cpt ii). 5/2000 [MASS=73777]/Carnitine palmitoyltransferase II, a mitochondrial long-chain fatty acid oxidation enzyme; mutations are associated with a lipid metabolism disorder that includes recurrent myopathy with progressive rhabdomyolysis, muscle weakness and myoglobinuria                                                                     |
| Acyl CoA dehydrogenase                       | SW:ACDV_HUMAN  | ACADVL  | 18, 19     | -0.065 | 1  | 0.32 | 0.00 | SW:ACDV_HUMAN P49748 homo sapiens (human). acyl-coa dehydrogenase, very-long-chain specific, mitochondrial precursor (ec 1.3.99.-) (vicad). 5/2000 [MASS=70390]/Very long chain acyl-coenzyme A dehydrogenase, oxidizes straight chain acyl-CoAs in the initial step of fatty acid beta-oxidation, severe deficiency results in infant cardiomyopathy with high mortality, mild deficiency results in hypoketotic hypoglycemia                                                   |
| Enoyl CoA hydratase                          | SW:D3D2_HUMAN  | DCI     | 18, 19     |        | 3  | 1.31 | 0.20 | SW:D3D2_HUMAN P42126 homo sapiens (human). 3,2-trans-enoyl-coa isomerase, mitochondrial precursor (ec 5.3.3.8) (dodecenoyl-coa delta-isomerase). 7/1999 [MASS=32816]/Dodecenoyl-Coenzyme A delta isomerase (3,2 trans-enoyl-Coenzyme A isomerase), catalyzes the isomerization of 3-cis and 3-trans enoyl CoA esters to 2-trans enoyl CoA esters, functions in mitochondrial beta-oxidation of unsaturated fatty acids                                                           |
| 3-hydroxyacyl-CoA dehydrogenase              | SW:HCD2_HUMAN  | HADH2   | 19         | 0.233  | 4  | 1.67 | 0.12 | SW:HCD2_HUMAN Q99714 homo sapiens (human). 3-hydroxyacyl-coa dehydrogenase type ii (ec 1.1.1.35) (endoplasmic reticulum-associated amyloid beta-peptide binding protein) (short- chain type dehydrogenase/ [MASS=26923]/Hydroxyacyl-Coenzyme A dehydrogenase (type II), catalyzes the oxidation of steroids and alcohols, binds amyloid-beta protein; overexpressed and mediates neurotoxicity of Alzheimer's disease, mutation in the corresponding gene causes hyperinsulinism |
| b-ketothiolase                               | SW:ECHB_HUMAN  | HADHB   | 18, 19, 42 | -0.072 | 4  | 1.87 | 0.07 | SW:ECHB_HUMAN P55084 homo sapiens (human). trifunctional enzyme beta subunit, mitochondrial precursor (tp-beta) [includes: 3-ketoacyl-coa thiolase (ec 2.3.1.16) (acetyl-coa acyltransferase) (beta-ketothi [MASS=51294]/3-hydroxyacyl-CoA dehydrogenase, 3-ketoacyl-CoA thiolase trifunctional protein beta subunit, involved in fatty acid beta-oxidation; variants are associated with trifunctional protein deficiency, sudden infant death syndrome and liver failure       |
|                                              | SW:ECHA_HUMAN  | HADHA   | 18, 19, 42 | -0.083 | 13 | 1.97 | 0.65 | SW:ECHA_HUMAN P40939 homo sapiens (human). mitochondrial trifunctional enzyme alpha subunit precursor (tp-alpha) [includes: long-chain enoyl-coa hydratase (ec 4.2.1.17); long chain 3-hydroxyacyl-coa deh [MASS=82960]/Mitochondrial long-chain enoyl-CoA hydratase/3-hydroxyacyl-CoA dehydrogenase/3-ketoacyl-CoA thiolase alpha subunit, involved in fatty acid beta-oxidation, mutations are associated with trifunctional protein deficiency and Reye-like syndrome         |
| <b>Peroxisomal Fatty Acid beta-oxidation</b> |                |         |            |        |    |      |      |                                                                                                                                                                                                                                                                                                                                                                                                                                                                                  |
| Acyl-CoA synthetase                          | NI             |         |            |        |    |      |      |                                                                                                                                                                                                                                                                                                                                                                                                                                                                                  |
| Phytanoyl-CoA hydroxylase                    | NI             |         |            |        |    |      |      |                                                                                                                                                                                                                                                                                                                                                                                                                                                                                  |
| 2-hydroxyphytanoyl-CoA lyase                 | GP:AF161397_1  | HPCL2   | 19         | -0.059 | 2  | 2.53 | 0.16 | GP:AF161397_1 Homo sapiens HSPC279 mRNA, partial cds. [MASS=64199]/Homo sapiens mRNA for 2-hydroxyphytanoyl-CoA lyase; thiamine pyrophosphate dependent enzyme/2-Hydroxyphytanoyl-CoA lyase (peroxisomal 2-hydroxyphytanoyl-CoA lyase), catalyzes the thiamine pyrophosphate-dependent cleavage of C-C bonds during alpha-oxidation of 3-methyl-branched fatty acids to form formyl-CoA and 2-methyl-branched fatty aldehyde                                                     |
| Aldehyde dehydrogenase                       | SW:DHA4_HUMAN  | ALDH3A2 | 16, 19     |        | 2  | 1.62 | 0.67 | SW:DHA4_HUMAN P51648 homo sapiens (human). fatty aldehyde dehydrogenase (ec 1.2.1.3) (aldehyde dehydrogenase, microsomal) (aldh class 3). 7/1999 [MASS=54848]/Aldehyde dehydrogenase 3 family member A2, catalyzes the oxidation of long chain fatty aldehydes and leukotrienes; mutation of the corresponding gene causes Sjogren Larsson syndrome, a disorder marked by mental retardation, spasticity, and ichthyosis                                                         |
| alpha-methyl-CoA racemase                    | NI             |         |            |        |    |      |      |                                                                                                                                                                                                                                                                                                                                                                                                                                                                                  |
| branched chain acyl-CoA oxidase              | SW:CAOP_HUMAN  | ACOX    | 18, 19     |        | 1  | 1.53 | 0.00 | SW:CAOP_HUMAN Q15067 homo sapiens (human). acyl-coenzyme a oxidase, peroxisomal (ec 1.3.3.6) (palmitoyl-coa oxidase) (aox). 11/1997 [MASS=74502]/Peroxisomal acyl-coenzyme A oxidase, catalyzes the first step in very long chain fatty acid beta-oxidation, desaturates acyl-CoA to 2-trans-enoyl-CoA and produces hydrogen peroxide                                                                                                                                            |
| 2-enoyl-CoA hydratase                        | NI             |         |            |        |    |      |      |                                                                                                                                                                                                                                                                                                                                                                                                                                                                                  |
| 3-hydroxyacyl-CoA dehydrogenase              | NI             |         |            |        |    |      |      |                                                                                                                                                                                                                                                                                                                                                                                                                                                                                  |
| 3-ketoacyl-CoA thiolase                      | SW:THIK_HUMAN  | ACAA1   | 18, 19     |        | 15 | 1.26 | 0.25 | SW:THIK_HUMAN P09110 homo sapiens (human). 3-ketoacyl-coa thiolase, peroxisomal precursor (ec 2.3.1.16) (beta-ketothiolase) (acetyl-coa acyltransferase) (peroxisomal 3-oxoacyl-coa thiolase), 7/1999 [MASS=44292]/Peroxisomal 3-oxoacyl-coenzyme A thiolase (peroxisomal 3-ketoacyl-Coenzyme A thiolase), functions in peroxisomal beta-oxidation of fatty acids, deficiency is associated with rhizomelic chondrodysplasia punctata (RCDP)                                     |
| <b>Gluconeogenesis</b>                       |                |         |            |        |    |      |      |                                                                                                                                                                                                                                                                                                                                                                                                                                                                                  |
| Pyruvate carboxylase                         | NI             |         |            |        |    |      |      |                                                                                                                                                                                                                                                                                                                                                                                                                                                                                  |
| Phosphoenolpyruvate carboxykinase            | SW:PPCM_HUMAN  | PCK2    | 5, 18      | -0.266 | 6  | 2.45 | 1.09 | SW:PPCM_HUMAN Q16822 homo sapiens (human). phosphoenolpyruvate carboxykinase, mitochondrial precursor [gtp] (ec 4.1.1.32) (phosphoenolpyruvate carboxylase) (pepck-m). 7/1999 [MASS=70637]/Phosphoenolpyruvate carboxykinase 2, catalyzes the formation of phosphoenolpyruvate by decarboxylation of oxaloacetate, rate-limiting step of gluconeogenesis                                                                                                                         |
| Fructose 1, 6-bisphosphatase                 | NI             |         |            |        |    |      |      |                                                                                                                                                                                                                                                                                                                                                                                                                                                                                  |
| Glucose 6-phosphatase                        | NI             |         |            |        |    |      |      |                                                                                                                                                                                                                                                                                                                                                                                                                                                                                  |
| <b>Glycolysis</b>                            |                |         |            |        |    |      |      |                                                                                                                                                                                                                                                                                                                                                                                                                                                                                  |
| Hexokinase                                   | SW:H XK1_HUMAN | HK1     | 5, 18      |        | 5  | 1.07 | 0.11 | SW:H XK1_HUMAN P19367 homo sapiens (human). hexokinase, type i (ec 2.7.1.1) (hk i) (brain form hexokinase). 12/1998 [MASS=102503]/Hexokinase Type I (ATP:D-hexose 6-phosphotransferase), catalyzes ATP-dependent conversion of glucose to glucose 6 phosphate in glycolysis, deficiency may lead to non-spherocytic hemolytic anemia                                                                                                                                             |
| Phosphoglucose isomerase                     | SW:G6PI_HUMAN  | GPI     | 5          |        | 2  | 0.85 | 0.01 | SW:G6PI_HUMAN P06744 homo sapiens (human). glucose-6-phosphate isomerase (gpi) (ec 5.3.1.9) (phosphoglucose isomerase) (pgi) (phosphohexose isomerase) (phi) (neuroleukin) (nlk). 5/2000 [MASS=63189]/Glucose phosphate isomerase, plays a role in glycolysis and gluconeogenesis, tumor-secreted form (neuroleukin) acts as an autocrine factor to stimulate motility, invasion and metastasis of cancer cells; deficiency is associated with hemolytic anemia                  |
| Phosphofructokinase                          | SW:K6PL_HUMAN  | PFKL    | 5, 18      |        | 8  | 0.97 | 0.17 | SW:K6PL_HUMAN P17858 homo sapiens (human). 6-phosphofructokinase, liver type (ec 2.7.1.11) (phosphofructokinase 1) (phosphohexokinase) (phosphofructo-1-kinase isozyme b). 10/1996 [MASS=85148]/Liver phosphofructokinase, catalyzes the phosphorylation of fructose-6-phosphate to fructose-1,6-bisphosphate in glycolysis, deficiency is linked to glycogenesis type VII while overexpression may lead to the cognitive disabilities of Down's syndrome                        |
|                                              | SW:K6PP_HUMAN  | PFKP    | 5          | -0.146 | 1  | 2.96 | 0.00 | SW:K6PP_HUMAN Q01813 homo sapiens (human). 6-phosphofructokinase, type c (ec 2.7.1.11) (phosphofructokinase 1) (phosphohexokinase) (phosphofructo-1-kinase isozyme c) (6-phosphofructokinase, platelet typ [MASS=85596]/Platelet-type phosphofructokinase, rate-limiting enzyme of glycolysis that catalyzes the formation of fructose 1,6-bisphosphate from fructose 6-phosphate and ATP; expression may be elevated upon malignant transformation                              |

|                                          |               |       |           |        |    |      |      |                                                                                                                                                                                                                                                                                                                                                                                                                                                                                       |
|------------------------------------------|---------------|-------|-----------|--------|----|------|------|---------------------------------------------------------------------------------------------------------------------------------------------------------------------------------------------------------------------------------------------------------------------------------------------------------------------------------------------------------------------------------------------------------------------------------------------------------------------------------------|
| Aldolase                                 | SW:ALFA_HUMAN | ALDOA | 5         |        | 4  | 0.71 | 0.25 | SW:ALFA_HUMAN P04075 homo sapiens (human), fructose-bisphosphate aldolase a (ec 4.1.2.13) (muscle-type aldolase). 5/2000 [MASS=39289]/Aldolase A (fructose-bisphosphate aldolase); reversibly cleaves FBP into DHAP and GAP in glycolysis                                                                                                                                                                                                                                             |
| Triose phosphate isomerase               | SW:TPIS_HUMAN | TPI1  | 5, 16, 18 |        | 9  | 1.00 | 0.18 | SW:TPIS_HUMAN P00938 homo sapiens (human), and pan troglodytes (chimpanzee), triosephosphate isomerase (ec 5.3.1.1) (tim). 7/1998 [MASS=26538]/Triosephosphate isomerase 1, catalyzes the reversible interconversion of glyceraldehyde 3-phosphate and dihydroxyacetone phosphate in glycolysis; variant forms cause hemolytic anemia and neurodegeneration; variant form is an antigen on melanoma cells                                                                             |
| Glyceraldehyde 3-phosphate dehydrogenase | SW:G3P2_HUMAN | GAPD  | 5, 14, 18 |        | 2  | 0.85 | 0.01 | SW:G3P2_HUMAN P04406 homo sapiens (human), glyceraldehyde 3-phosphate dehydrogenase, liver (ec 1.2.1.12). 7/1999 [MASS=35922]/Glyceraldehyde-3-phosphate dehydrogenase, catalyzes reversible oxidation and phosphorylation of glyceraldehyde-3-phosphate to 1,3-diphosphoglycerate in glycolysis, involved in apoptosis, may play a role in neurodegeneration in diseases like Alzheimer's                                                                                            |
| Phosphoglycerate kinase                  | SW:PGK1_HUMAN | PGK1  | 5, 18     |        | 16 | 0.93 | 0.18 | SW:PGK1_HUMAN P00558 homo sapiens (human), phosphoglycerate kinase 1 (ec 2.7.2.3) (primer recognition protein 2) (prp 2). 7/1999 [MASS=44597]/Phosphoglycerate kinase 1, catalyzes conversion of 1,3-diphosphoglycerate to 3-phosphoglycerate in glycolysis, forming one molecule of ATP; PGK1 gene transcription is induced by hypoxia and mutation is associated with non-spherocytic hemolytic anemia                                                                              |
| Phosphoglyceromutase                     | NI            |       |           |        |    |      |      |                                                                                                                                                                                                                                                                                                                                                                                                                                                                                       |
| Enolase                                  | SW:ENOB_HUMAN | ENO3  | 5, 18     |        | 4  | 0.86 | 0.13 | SW:ENOB_HUMAN P13929 homo sapiens (human), beta enolase (ec 4.2.1.11) (2-phospho-d-glycerate hydro-lyase) (skeletal muscle enolase) (mse). 7/1998 [MASS=46856]/Enolase 3 (muscle-specific enolase, beta enolase), a putative enolase which catalyzes the conversion of 2-phospho-D-glycerate to phosphoenolpyruvate in muscle glycolysis, deficiency is associated with exercise intolerance and myalgias                                                                             |
|                                          | SW:ENOA_HUMAN | ENO1  | 5, 18, 29 |        | 3  | 1.01 | 0.08 | SW:ENOA_HUMAN P06733 homo sapiens (human), alpha enolase (ec 4.2.1.11) (2-phospho-d-glycerate hydro-lyase) (non-neural enolase) (nne) (phosphopyruvate hydratase). 7/1998 [MASS=47038]/Enolase 1 (alpha enolase), converts 2-phospho-D-glycerate to phosphoenolpyruvate in glycolysis, an autoantigen in multiple autoimmune diseases, shorter alternative form c-myc promoter binding protein (MPB1) is a transcriptional repressor                                                  |
| Pyruvate kinase                          | SW:KPY1_HUMAN | PKM2  | 5, 18     |        | 19 | 1.09 | 0.24 | SW:KPY1_HUMAN P14618 homo sapiens (human), pyruvate kinase, m1 isozyme (ec 2.7.1.40) (pyruvate kinase muscle isozyme) (cytosolic thyroid hormone-binding protein) (cthb) (thbp1). 12/1998 [MASS=57747]/Pyruvate kinase muscle (pyruvate kinase 3), glycolytic enzyme that converts phosphoenolpyruvate to pyruvate with phosphorylation of ADP to ATP, exists as M1 and M2 alternative forms, may have roles in viral transformation and cell differentiation                         |
| <b>Glycogen Catabolism</b>               |               |       |           |        |    |      |      |                                                                                                                                                                                                                                                                                                                                                                                                                                                                                       |
| Phosphorylase kinase                     | SW:KPB1_HUMAN | PHKA1 | 5, 18     |        | 3  | 1.00 | 0.09 | SW:KPB1_HUMAN P46020 homo sapiens (human), phosphorylase b kinase alpha regulatory chain, skeletal muscle isoform (phosphorylase kinase alpha m subunit). 2/1996 [MASS=137338]/Phosphorylase kinase regulatory subunit alpha-1 (muscle), which phosphorylates and thereby activates muscle-specific glycogen phosphorylase (PYGM); mutations in the corresponding gene are associated with muscle glycogenosis, a glycogen storage disease                                            |
| Glycogen phosphorylase                   | SW:PHS2_HUMAN | PYGM  | 5, 18     | -0.371 | 1  | 0.36 | 0.00 | SW:PHS2_HUMAN P11217 homo sapiens (human), glycogen phosphorylase, muscle form (ec 2.4.1.1) (myophosphorylase). 5/2000 [MASS=97092]/Muscle glycogen phosphorylase, participates in glycogen catabolism; mutation of corresponding gene is associated with McArdle disease                                                                                                                                                                                                             |
|                                          | SW:PHS3_HUMAN | PYGB  | 5, 18     | -0.334 | 10 | 0.48 | 0.06 | SW:PHS3_HUMAN P11216 homo sapiens (human), glycogen phosphorylase, brain form (ec 2.4.1.1). 10/1996 [MASS=96683]/Brain glycogen phosphorylase, catalyzes the rate-limiting step in glycogen catabolism, activated by AMP and phosphorylation, may play a role in intestinal development; associated with gastric carcinomas displaying a differentiated intestinal phenotype                                                                                                          |
| Glycogen transferase                     | SW:GLYG_HUMAN | GYG   | 5, 18     | -0.158 | 6  | 0.51 | 0.11 | SW:GLYG_HUMAN P46976 homo sapiens (human), glycogenin-1 (ec 2.4.1.186). 7/1999 [MASS=37347]/Glycogenin (glycogenin glucosyltransferase), autocatalytic and self-glucosylating enzyme that primes de novo glycogen synthesis                                                                                                                                                                                                                                                           |
| Alpha-1, 6-glucosidase                   | SW:GDE_HUMAN  | AGL   | 5, 18     |        | 18 | 0.92 | 0.22 | SW:GDE_HUMAN P35573 homo sapiens (human), glycogen debranching enzyme (glycogen debrancher) [includes: 4-alpha-glycanotransferase (ec 2.4.1.25) (oligo-1,4-1,4-glycanotransferase); amylo-1,6-glucosidase [MASS=172497]/Glycogen debranching enzyme, (amylo-1,6-glucosidase 4-alpha-glycanotransferase), catalyzes glycantransferase and glucosidase activities required for glycogen degradation; mutations and dysregulation are associated with type III glycogen storage diseases |
| <b>Fatty Acid Synthesis</b>              |               |       |           |        |    |      |      |                                                                                                                                                                                                                                                                                                                                                                                                                                                                                       |
| ATP citrate lyase                        | SW:ACLY_HUMAN | ACLY  | 5, 19, 25 | -0.093 | 6  | 0.44 | 0.09 | SW:ACLY_HUMAN P53396 homo sapiens (human), atp-citrate (pro-s-)-lyase (ec 4.1.3.8) (citrate cleavage enzyme). 10/1996 [MASS=121420]/ATP citrate lyase, catalyzes the formation of acetyl-CoA and oxaloacetate from citrate and CoA with the concomitant hydrolysis of ATP to ADP and phosphate, involved in cholesterol and fatty acid synthesis, nutritionally regulated                                                                                                             |
| Acetyl CoA carboxylase                   | SW:COA1_HUMAN | ACACA | 19        | -0.242 | 2  | 0.41 | 0.05 | SW:COA1_HUMAN Q13085 homo sapiens (human), acetyl-coa carboxylase 1 (ec 6.4.1.2) (acc-alpha) [includes: biotin carboxylase (ec 6.3.4.14)]. 7/1999 [MASS=265040]/Acetyl-Coenzyme A carboxylase alpha, catalyzes the rate-limiting step in long-chain fatty acid biogenesis; deficiency leads to defects in fatty acid synthesis                                                                                                                                                        |
| Fatty acid synthase                      | SW:FAS_HUMAN  | FASN  | 19        | -0.095 | 90 | 0.34 | 0.15 | SW:FAS_HUMAN P49327 homo sapiens (human), fatty acid synthase (ec 2.3.1.85) [includes: ec 2.3.1.38; ec 2.3.1.39; ec 2.3.1.41; ec 1.1.1.100; ec 4.2.1.61; ec 1.3.1.10; ec 3.1.2.14]. 7/1999 [MASS=273102]/Fatty acid synthase, multifunctional enzyme that synthesizes fatty acids from dietary proteins and carbohydrates; increased expression is associated with tumor growth and development, expression may serve as a prognostic maker for breast cancer                         |
| <b>Cholesterol Synthesis</b>             |               |       |           |        |    |      |      |                                                                                                                                                                                                                                                                                                                                                                                                                                                                                       |
| Hydroxymethyl glutaryl CoA synthase      | NI            |       |           |        |    |      |      |                                                                                                                                                                                                                                                                                                                                                                                                                                                                                       |
| Hydroxymethyl glutaryl CoA reductase     | NI            |       |           |        |    |      |      |                                                                                                                                                                                                                                                                                                                                                                                                                                                                                       |
| Melavonate Kinase                        | NI            |       |           |        |    |      |      |                                                                                                                                                                                                                                                                                                                                                                                                                                                                                       |
| Phosphomelavonate kinase                 | NI            |       |           |        |    |      |      |                                                                                                                                                                                                                                                                                                                                                                                                                                                                                       |
| Diphosphomelavonate decarboxylase        | NI            |       |           |        |    |      |      |                                                                                                                                                                                                                                                                                                                                                                                                                                                                                       |
| Isopentenylidiphosphate isomerase        | NI            |       |           |        |    |      |      |                                                                                                                                                                                                                                                                                                                                                                                                                                                                                       |
| Dimethylallyl-trans-transferase          | NI            |       |           |        |    |      |      |                                                                                                                                                                                                                                                                                                                                                                                                                                                                                       |
| Geranyl-trans-transferase                | NI            |       |           |        |    |      |      |                                                                                                                                                                                                                                                                                                                                                                                                                                                                                       |
| Farnesyl-PP farnesyl transferase         | SW:FDFT_HUMAN | FDFT1 | 19        | -0.224 | 1  | 0.22 | 0.00 | SW:FDFT_HUMAN P37268 homo sapiens (human), farnesyl-diphosphate farnesyltransferase (ec 2.5.1.121) (squalene synthetase) (sq) (ss) (fpp:pp farnesyltransferase). 10/1996 [MASS=48115]/Squalene synthase (farnesyl-diphosphate farnesyltransferase 1), catalyzes the conversion of farnesyl diphosphate to squalene in cholesterol biosynthesis, may be a potential target for cholesterol lowering therapy                                                                            |
| Squalene Monooxygenase                   | NI            |       |           |        |    |      |      |                                                                                                                                                                                                                                                                                                                                                                                                                                                                                       |



|                                  |               |         |        |        |   |      |      |                                                                                                                                                                                                                                                                                                                                                                                                                                                                   |
|----------------------------------|---------------|---------|--------|--------|---|------|------|-------------------------------------------------------------------------------------------------------------------------------------------------------------------------------------------------------------------------------------------------------------------------------------------------------------------------------------------------------------------------------------------------------------------------------------------------------------------|
| Lanosterol synthase              | SW:ERG7_HUMAN | LSS     | 19     | -0.319 | 1 | 0.37 | 0.00 | SW:ERG7_HUMAN P48449 homo sapiens (human). lanosterol synthase (ec 5.4.99.7) (oxidosqualene--lanosterol cyclase) (2,3-epoxysqualene--lanosterol cyclase) (osc). 5/2000 [MASS=83309]/Lanosterol synthase, catalyzes the cyclization of (S)-2,3-oxidosqualene forming lanosterol in sterol biosynthesis                                                                                                                                                             |
| <b>Oxidative Phosphorylation</b> |               |         |        |        |   |      |      |                                                                                                                                                                                                                                                                                                                                                                                                                                                                   |
| <b>Complex I</b>                 |               |         |        |        |   |      |      |                                                                                                                                                                                                                                                                                                                                                                                                                                                                   |
| NDUFB7                           | SW:NB8M_HUMAN | NDUFB7  | 6, 18  | -0.990 | 2 | 2.27 | 0.65 | SW:NB8M_HUMAN P17568 homo sapiens (human). nadh-ubiquinone oxidoreductase b18 subunit (ec 1.6.5.3) (ec 1.6.99.3) (complex i-b18) (ci-b18) (cell adhesion protein sqm1). 7/1998 [MASS=15648]/Subunit of the NADH-ubiquinone oxidoreductase (complex I), a multiprotein complex that transports electrons from NADH to ubiquinone, functions as a cell adhesion molecule with a role in metastasis, may have a role in drug transport                               |
| NDUFA8                           | SW:NUPM_HUMAN | NDUFA8  | 18     | -0.780 | 5 | 2.10 | 0.44 | SW:NUPM_HUMAN P51970 homo sapiens (human). nadh-ubiquinone oxidoreductase 19 kda subunit (ec 1.6.5.3) (ec 1.6.99.3) (complex i-19kd) (ci-19kd) (complex i-pgiv) (ci-pgiv). 5/2000 [MASS=19974]/NADH dehydrogenase ubiquinone 1 alpha subcomplex 8 (19 kDa), a subunit of NADH-ubiquinone oxidoreductase (complex I), a multiprotein complex that transports electrons from NADH to ubiquinone                                                                     |
| NDUFV1                           | SW:NUBM_HUMAN | NDUFV1  | 18     | -0.260 | 7 | 2.18 | 0.99 | SW:NUBM_HUMAN P49821 homo sapiens (human). nadh-ubiquinone oxidoreductase 51 kda subunit precursor (ec 1.6.5.3) (ec 1.6.99.3) (complex i-51kd) (ci-51kd). 5/2000 [MASS=50956]/NADH dehydrogenase ubiquinone flavoprotein 1 (51 kDa), a subunit of NADH-ubiquinone oxidoreductase (Complex I); genetic variants are associated with mitochondrial complex I deficiency, leukodystrophy, and myoclonic epilepsy                                                     |
| NDUFS5                           | SW:NIPM_HUMAN | NDUFS5  | 18     | -0.941 | 2 | 2.69 | 0.02 | SW:NIPM_HUMAN O43920 homo sapiens (human). nadh-ubiquinone oxidoreductase 15 kda subunit (ec 1.6.5.3) (ec 1.6.99.3) (complex i-15 kda) (ci-15 kda). 7/1999 [MASS=12386]/NADH dehydrogenase Fe-S protein 5 (15kD) (NADH-coenzyme Q reductase), putative subunit of NADH-ubiquinone oxidoreductase (complex I), a multiprotein complex that transports electrons from NADH to ubiquinone in the mitochondrial respiratory chain                                     |
| NDUFAB1                          | SW:ACPM_HUMAN | NDUFAB1 | 18     |        | 3 | 1.46 | 0.23 | SW:ACPM_HUMAN O14561 homo sapiens (human). acyl carrier protein, mitochondrial precursor (acp) (nadh-ubiquinone oxidoreductase 9.6 kda subunit) (ec 1.6.5.3) (ec 1.6.99.3) (ci-sdap). 5/2000 [MASS=14806]/NADH-ubiquinone oxidoreductase subunit of alpha-beta subcomplex 1 (8 kD), a probable acyl carrier component of the multiprotein complex that transports electrons from NADH to ubiquinone, present within the hydrophobic fraction of complex I         |
| NDUFS1                           | SW:NUAM_HUMAN | NDUFS1  | 18     | -0.107 | 1 | 1.87 | 0.00 | SW:NUAM_HUMAN P28331 homo sapiens (human). nadh-ubiquinone oxidoreductase 75 kda subunit precursor (ec 1.6.5.3) (ec 1.6.99.3) (complex i-75kd) (ci-75kd). 7/1999 [MASS=79574]/NADH-dehydrogenase ubiquinone Fe-S protein 1 (75kD), a multiprotein complex that transports electrons from NADH to ubiquinone, present within the hydrophobic fraction of complex I; genetic variants are associated with mitochondrial complex I deficiency                        |
| <b>Complex II</b>                |               |         |        |        |   |      |      |                                                                                                                                                                                                                                                                                                                                                                                                                                                                   |
| SDHA                             | SW:DHSA_HUMAN | SDHA    | 5, 18  | -0.270 | 5 | 2.48 | 0.32 | SW:DHSA_HUMAN P31040 homo sapiens (human). succinate dehydrogenase [ubiquinone] flavoprotein subunit, mitochondrial precursor (ec 1.3.5.1) (fp) (flavoprotein subunit of complex ii). 5/2000 [MASS=72692]/Succinate dehydrogenase complex subunit A (flavoprotein), transports electrons from succinate to ubiquinone in the TCA cycle and respiratory chain; gene mutation is associated with Leigh syndrome, which is a complex II respiratory chain deficiency |
| SDHB                             | SW:DHSB_HUMAN | SDHB    | 5, 18  | -0.410 | 1 | 2.24 | 0.00 | SW:DHSB_HUMAN P21912 homo sapiens (human). succinate dehydrogenase [ubiquinone] iron-sulfur protein, mitochondrial precursor (ec 1.3.5.1) (ip) (ip subunit of complex ii). 5/2000 [MASS=31629]/Succinate dehydrogenase complex iron sulfur subunit B, part of an enzyme complex that transports electrons from succinate to ubiquinone in the TCA cycle and aerobic respiratory chain, may be involved in familial pheochromocytoma                               |
| <b>Complex III</b>               |               |         |        |        |   |      |      |                                                                                                                                                                                                                                                                                                                                                                                                                                                                   |
| UQCRC2                           | SW:UCR2_HUMAN | UQCRC2  | 18     | -0.077 | 1 | 2.42 | 0.00 | SW:UCR2_HUMAN P22695 homo sapiens (human). ubiquinol-cytochrome c reductase complex core protein 2 precursor (ec 1.10.2.2) (complex iii subunit ii). 7/1999 [MASS=48470]/Ubiquinol-cytochrome c reductase core protein II, a putative ubiquinol-cytochrome c reductase subunit of the mitochondrial cytochrome bc1 complex, likely to play a role in oxidative phosphorylation, may be involved in aerobic respiration                                            |
| CYC1                             | SW:CY1_HUMAN  | CYC1    | 18     | -0.130 | 2 | 2.10 | 0.00 | SW:CY1_HUMAN P08574 homo sapiens (human). cytochrome c1, heme protein precursor. 7/1999 [MASS=35390]/Cytochrome c1, a member of the cytochrome bc1 complex                                                                                                                                                                                                                                                                                                        |
| UQCRH                            | SW:UCRH_HUMAN | UQCRH   | 18     | -1.141 | 3 | 2.36 | 0.26 | SW:UCRH_HUMAN P07919 homo sapiens (human). ubiquinol-cytochrome c reductase complex 11 kda protein precursor (ec 1.10.2.2) (mitochondrial hinge protein) (cytochrome c1, nonheme 11 kda protein) (complex [MASS=10755]/Ubiquinol-cytochrome c reductase hinge protein, hinges cytochrome c with cytochrome c1 in the mitochondrial respiratory chain, may function to accelerate apoptosis by enhancing cytochrome c release from the mitochondria                |
| UQCRC1                           | SW:UCR1_HUMAN | UQCRC1  | 18     | -0.135 | 8 | 2.24 | 0.43 | SW:UCR1_HUMAN P31930 homo sapiens (human). ubiquinol-cytochrome c reductase complex core protein i precursor (ec 1.10.2.2). 7/1999 [MASS=52619]/Ubiquinol-cytochrome c reductase core protein I, a subunit of the ubiquinol-cytochrome c oxidoreductase component of the mitochondrial respiratory chain, may function as an electron transporter in aerobic respiration and oxidative phosphorylation                                                            |
| <b>Complex IV</b>                |               |         |        |        |   |      |      |                                                                                                                                                                                                                                                                                                                                                                                                                                                                   |
| MTCO1                            | SW:COX1_HUMAN | MTCO1   | 18     | 0.682  | 1 | 1.97 | 0.00 | SW:COX1_HUMAN P00395 homo sapiens (human). cytochrome c oxidase polypeptide i (ec 1.9.3.1). 5/2000 [MASS=57041]/Mitochondrial cytochrome c oxidase subunit I, a subunit of complex IV of the mitochondrial respiratory chain; mutations in the corresponding gene may be associated with mitochondrial diseases and acquired idiopathic sideroblastic anemia                                                                                                      |
| COX6B                            | SW:COXG_HUMAN | COX6B   | 18     | -1.021 | 6 | 2.77 | 1.08 | SW:COXG_HUMAN P14854 homo sapiens (human). cytochrome c oxidase polypeptide vib (ec 1.9.3.1) (aed). 11/1997 [MASS=10061]/Cytochrome c oxidase subunit Vib, a putative subunit of cytochrome C oxidase, which couples reduction of oxygen with proton translocation during oxidative phosphorylation                                                                                                                                                               |
| COX17                            | SW:COXS_HUMAN | COX17   | 18, 42 |        | 1 | 1.18 | 0.00 | SW:COXS_HUMAN Q14061 homo sapiens (human). cytochrome c oxidase copper chaperone. 7/1999 [MASS=6784]/Cytochrome c oxidase assembly protein 17, a putative copper binding protein, may function to transport copper to mitochondria for assembly into cytochrome oxidase complex; mutation does not appear to be a common cause of COX deficiency disorders                                                                                                        |
| <b>Complex V</b>                 |               |         |        |        |   |      |      |                                                                                                                                                                                                                                                                                                                                                                                                                                                                   |

|                     |               |        |        |        |   |      |      |                                                                                                                                                                                                                                                                                                                                                                                               |
|---------------------|---------------|--------|--------|--------|---|------|------|-----------------------------------------------------------------------------------------------------------------------------------------------------------------------------------------------------------------------------------------------------------------------------------------------------------------------------------------------------------------------------------------------|
| ATP6D               | SW:VATX_HUMAN | ATP6D  | 42     |        | 2 | 0.89 | 0.03 | SW:VATX_HUMAN Q02547 homo sapiens (human). vacuolar atp synthase subunit ac39 (ec 3.6.1.34) (v-atpase ac39 subunit) (32 kda accessory protein) (p39). 11/1997 [MASS=31704]/Vacuolar H+-ATPase proton pump (subunit D), an accessory subunit in the peripheral catalytic V1 complex, may be involved in coupling ATP hydrolysis (V1 complex) and proton transport (V0 complex)                 |
| ATP5C1              | SW:ATPG_HUMAN | ATP5C1 | 18, 42 | -0.180 | 3 | 2.15 | 0.32 | SW:ATPG_HUMAN P36542 homo sapiens (human). atp synthase gamma chain, mitochondrial precursor (ec 3.6.1.34). 5/2000 [MASS=32996]/ATP synthase H+ transporting mitochondrial F1 complex gamma 1, putative component of multisubunit enzyme that synthesizes ATP during oxidative phosphorylation, exists in tissue-specific alternative forms that are spliced in response to acidic conditions |
| ATP5A1              | SW:ATPA_HUMAN | ATP5A1 | 18, 42 | -0.067 | 8 | 2.38 | 0.42 | SW:ATPA_HUMAN P25705 homo sapiens (human). atp synthase alpha chain, mitochondrial precursor (ec 3.6.1.34). 12/1998 [MASS=59751]/ATP synthase H+ transporting mitochondrial F1 complex alpha subunit isoform 1 cardiac muscle, part of the synthase enzymatic complex that catalyzes the synthesis of ATP during oxidative phosphorylation                                                    |
| ATP5H               | SW:ATPQ_HUMAN | ATP5H  | 18     | -0.569 | 3 | 2.67 | 0.53 | SW:ATPQ_HUMAN O75947 homo sapiens (human). atp synthase d chain, mitochondrial (ec 3.6.1.34). 5/2000 [MASS=18360]/Protein with high similarity to subunit d of the mitochondrial H(+)-ATP synthase (rat Atp5jd), which is part of a multisubunit enzyme that catalyzes the synthesis of ATP during oxidative phosphorylation                                                                  |
|                     |               |        |        |        |   |      |      |                                                                                                                                                                                                                                                                                                                                                                                               |
| NI = Not Identified |               |        |        |        |   |      |      |                                                                                                                                                                                                                                                                                                                                                                                               |
